# Supplementary material for: Hypervalent iodide( iii )-mediated thiofluorination of alkenes and alkynes from thioureas/thiocarbamoyl fluorides with water and a nucleophilic fluoride source
Source: Royal Society of Chemistry journal article supplement (doi:10.1039/d4qo01569j), 2024-01-01

# Supporting Information

## **Hypervalent Iodide(III)-Mediated Thiofluorination of Alkenes and Alkynes from Thioureas/Thiocarbamoyl Fluorides with Water and Nucleophilic Fluoride Source**

Junyi Zhou, Xiang Wang, Wenjun Tang and Liqin Jiang \*

School of Chemistry and Molecular Engineering, East China Normal University, Shanghai 200241, China.

lqjiang@sat.ecnu.edu.cn

## Table of contents

|                                                                                                                                                                         |    |
|-------------------------------------------------------------------------------------------------------------------------------------------------------------------------|----|
| 2. General experimental procedures for synthesis of (homo)allyl/propargyl amines, alkenyl/alkynyl thioureas, thiocarbamoyl fluorides and PhI(OPiv) <sub>2</sub> . ..... | 3  |
| 2.1 General procedure for preparation of (homo)allyl/propargyl secondary amines <sup>1</sup> . 3                                                                        |    |
| 2.2 General procedure for preparation of alkenyl/alkynyl thioureas 1, 5 <sup>1</sup> . .....                                                                            | 4  |
| 2.3 General procedure for preparation of thiocarbamoyl fluorides 3 <sup>2</sup> . .....                                                                                 | 4  |
| 2.4 General procedure for preparation of PhI(OPiv) <sub>2</sub> <sup>3</sup> . .....                                                                                    | 5  |
| 2.5 The procedure for reactions of Ph <sub>2</sub> S <sub>2</sub> /PhSH/ <i>n</i> -butylthioalcohol, Et <sub>3</sub> N • 3HF, and cyclohexane. ....                     | 5  |
| 3. Optimization of reaction conditions for (Z)- <i>N</i> -(5-(fluoromethyl)-3-phenylthiazolidin-2-ylidene)benzamide 2a. ....                                            | 5  |
| 4. Optimization of reaction conditions for <i>N</i> -((2Z,5E)-5-(1-fluoroethylidene)-3-phenylthiazolidin-2-ylidene)benzamide 6a. ....                                   | 7  |
| 5. General procedure for synthesis of acylcarbamimidothioate 2. ....                                                                                                    | 8  |
| 6. General procedure for synthesis of carbamothioate 4. ....                                                                                                            | 9  |
| 7. General procedure for synthesis of carbamothioate 8. ....                                                                                                            | 9  |
| 6. Analytical data. ....                                                                                                                                                | 10 |
| 7. Mechanism study. ....                                                                                                                                                | 81 |
| 7.1 Radical trapping experiment . . . . .                                                                                                                               | 81 |
| 7.2 Isotope labeling experiment (H <sub>2</sub> <sup>18</sup> O) . . . . .                                                                                              | 82 |
| 7.3 Chiral regulation experiment . . . . .                                                                                                                              | 83 |
| 7.4 Experiment of disulfide as a sulfur source. . . . .                                                                                                                 | 83 |
| 8. The 4 mmol scale of procedures for 2a. ....                                                                                                                          | 84 |
| 9. The 10 mmol scale of procedures for 4a. ....                                                                                                                         | 84 |
| 10. The 4.6 mmol scale of procedures for 6a. ....                                                                                                                       | 85 |
| 11. The X-ray crystallographic analysis for 2af (CCDC 2364347). ....                                                                                                    | 85 |
| 12. 1D NOESY spectra. ....                                                                                                                                              | 87 |
| 12.1 1D NOESY spectra of 2ae . . . . .                                                                                                                                  | 88 |
| 12.2 1D NOESY spectra of 2af . . . . .                                                                                                                                  | 89 |
| 12.3 1D NOESY spectra of 4k . . . . .                                                                                                                                   | 90 |
| 12.4 1D NOESY spectra of 4l . . . . .                                                                                                                                   | 92 |
| 12.5 1D NOESY spectra of 4m . . . . .                                                                                                                                   | 93 |
| 12.6 1D NOESY spectra of 6h . . . . .                                                                                                                                   | 95 |
| 13. NMR spectra. ....                                                                                                                                                   | 96 |

## 1. General information & materials. ....

Unless otherwise stated, all commercial reagents and solvents were used without additional purification.  $^1\text{H}$  NMR and  $^{13}\text{C}$  NMR spectra were recorded in  $\text{CDCl}_3$  at Bruker 500 MHz or 600 MHz, using  $\text{CDCl}_3$  as a reference standard ( $\delta = 7.26$  ppm) for  $^1\text{H}$  NMR and ( $\delta = 77.0$  ppm) for  $^{13}\text{C}$  NMR. Thin-layer chromatography (TLC) was carried out using commercially prepared 100-400 mesh silica gel plates (GF254) and visualization was effected at 254 nm. The dilute solvents usually used ethyl acetate/petroleum ether, which was abbreviated as petroleum ether / ethyl acetate. High resolution mass spectra (HRMS) were recorded on the Exactive Mass Spectrometer equipped with EI or ESI ionization source and a time-of-flight (TOF) mass spectrometer.

## 2. General experimental procedures for synthesis of (homo)allyl/propargyl amines, alkenyl/alkynyl

thioureas, thiocarbamoyl fluorides and  $\text{PhI}(\text{OPiv})_2$ .

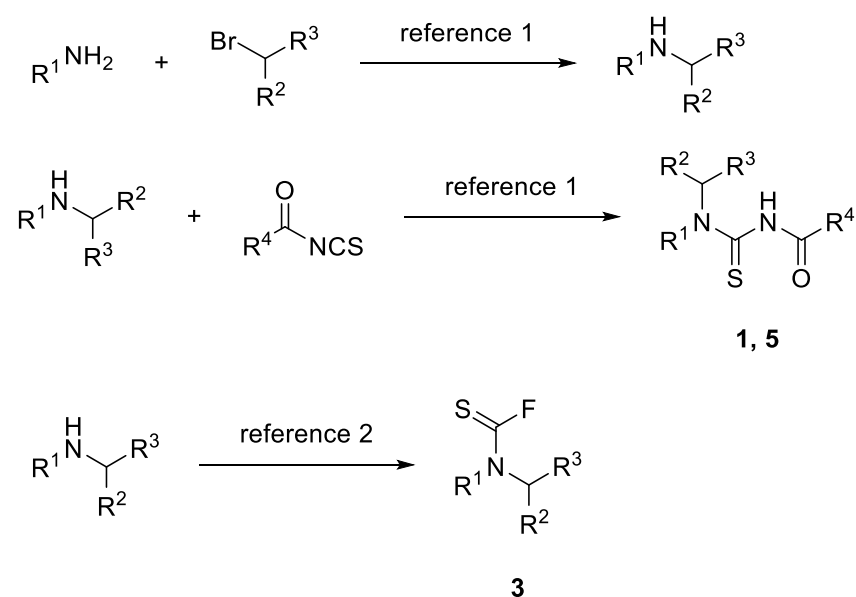

### 2.1 General procedure for preparation of (homo)allyl/propargyl secondary amines<sup>1</sup>.

A solution of primary amine (2.0 eq), potassium carbonate (2.0 eq) and (homo)allyl/propargyl bromide (1.0 eq, containing an alkene or alkyne group) in DMF (0.5 M) was stirred at room temperature overnight. The reaction was then quenched with water, extracted with EA, and the combined organic phases were washed with brine, dried with anhydrous  $\text{Na}_2\text{SO}_4$  and filtered. The filtrate was concentrated under reduced

pressure and the residue was purified by column chromatography on silica gel using petroleum ether or petroleum ether / ethyl acetate afforded the desired secondary amine.

## 2.2 General procedure for preparation of alkenyl/alkynyl thioureas **1**, **5**<sup>1</sup>.

### Method A

A solution of KSCN (2 eq) and acyl chloride (1 eq) in acetone (1 M) was stirred at room temperature for 1~2 h, then secondary amine was added and the reaction was stirred at room temperature for 2~12 h. The reaction mixture was filtered. The filtrate was concentrated and the residue was purified by flash chromatography on silica gel using petroleum ether / ethyl acetate to give alkenyl/alkynyl thioureas **1a-1o**, **1q-1af**, **1ah**, **lai**, **5a-5c**, **5h**, **5k**, **5l**.

### Method B

A solution of acyl isothiocyanate (1 eq) and secondary amine (1 eq) in THF (0.1 M) was stirred at room temperature for 1~12 h until one of the reactants was consumed. The reaction mixture was concentrated and the residue was purified by flash chromatography on silica gel using petroleum ether / ethyl acetate to give alkenyl/alkynyl thioureas **1p**, **1ag**, **1aj**, **1ak**, **5d-5g**, **5i**, **5j**.

## 2.3 General procedure for preparation of thiocarbamoyl fluorides **3**<sup>2</sup>.

### Method A

A solution of sulfur (4 eq) and KF (3 eq) in THF (0.1 M) was added TMSCF<sub>3</sub> (5 eq) under N<sub>2</sub>, followed by the solution of secondary amines (1 eq, it could be dissolved in a small amount of THF if the amine is a solid). The mixture was stirred under N<sub>2</sub> at room temperature for 1-12 h until the secondary amine was consumed. Then the reaction mixture was filtered. The filtrate was concentrated and the residue was purified by flash chromatography on silica gel using petroleum ether / ethyl acetate to give thiocarbamoyl fluorides **3a-3c**, **3e-3i**, **3k-3l**, **3n**, **3p-3t**.

### Method B

A solution of secondary amines (1 eq), AgSCF<sub>3</sub> (1.5 eq), KBr (2.5 eq) in acetonitrile (0.05 M) was stirred at atmosphere at room temperature for 2 h until the amine was consumed. Then the reaction mixture was

filtered. The filtrate was concentrated and the residue was purified by flash chromatography on silica gel using petroleum ether / ethyl acetate to give the **3d**, **3j**, **3m**, **3o**.

#### 2.4 General procedure for preparation of PhI(OPiv)<sub>2</sub><sup>3</sup>.

A known compound, see references<sup>3</sup> for details

Reference:

[1] Liu, S.; Jiang, L. Copper-Catalyzed Multicomponent Reactions of Intramolecular and Intermolecular Thiotrifluoromethylation of Alkenes: Access to CF<sub>3</sub>-Containing 2-Iminothiazolidines and Isothioureas. *Org. Lett.* **2022**, *39*, 7157-7162.

[2] Zhen, L.; Fan, H. Wang, X.; Jiang, L. Synthesis of Thiocarbamoyl Fluorides and Isothiocyanates Using CF<sub>3</sub>SiMe<sub>3</sub> and Elemental Sulfur or AgSCF<sub>3</sub> and KBr with Amines. *Org. Lett.* **2019**, *21*, 2106–2110.

[3] Atmuri, N.; Reilley, D.; Lubell, W. *Org. Lett.* **2017**, *19*, 5066–5069.

#### 2.5 The procedure for reactions of Ph<sub>2</sub>S<sub>2</sub>/PhSH/*n*-butylthioalcohol, Et<sub>3</sub>N·3HF, and cyclohexane

A solution of PhI(OPiv)<sub>2</sub> (0.4 mmol) and Et<sub>3</sub>N·3HF (0.6 mmol, 3 eq) in CH<sub>2</sub>Cl<sub>2</sub> (3 mL) was stirred at room temperature for 5 minutes, then 1,2-diphenyldisulfane (0.16 mmol) or PhSH (0.16 mmol) or *n*-butylthioalcohol (0.16 mmol) was added. The mixture was stirred at the room temperature in N<sub>2</sub> atmosphere for 30 min. Subsequently, a CH<sub>2</sub>Cl<sub>2</sub> solution (3 mL) of cyclohexane (0.30 mmol) was added slowly. The mixture was stirred for 1 hour, and the reaction was subjected to detected by TLC and HRMS. The desired alkene 1,2-thiofluorination products were not detected. The PhSF or *n*-butyl-SF species was not been detected.

### 3. Optimization of reaction conditions for (Z)-N-(5-(fluoromethyl)-3-phenylthiazolidin-2-

ylidene)benzamide **2a**.

A solution of oxidant and alkenyl thioureas **1a** (0.2 mmol) in solvent (3 mL) was stirred, then fluorinating reagent was added. The mixture was stirred at the room temperature for 2-12 h until **2a** was consumed. Then

the reaction mixture was quenched with saturated NaHCO<sub>3</sub> solution, extracted with EA, and the combined organic phases were washed with brine, dried with anhydrous Na<sub>2</sub>SO<sub>4</sub> and filtered. The filtrate was concentrated under reduced pressure and the residue was purified by flash chromatography on silica gel eluting with petroleum ether: ethyl acetate = 10:1~5:1 to give product **2a**.

Initial discovery:

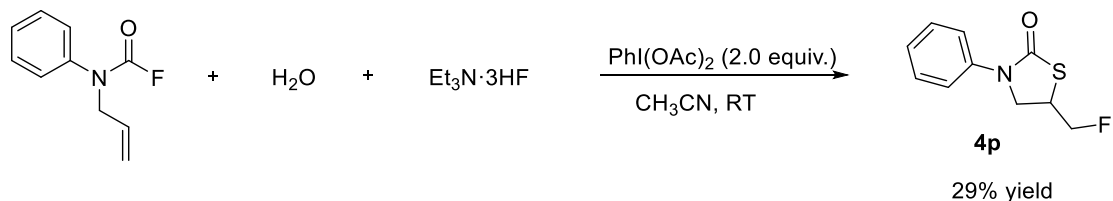

**Table S1.** Optimization of the reaction conditions for **2a**<sup>a</sup>.

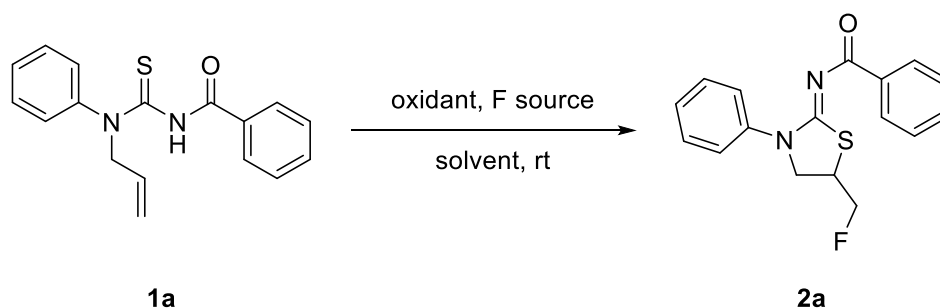

| entry           | oxidant                  | fluorinating reagent  | solvent                         | yield(%) <sup>b</sup> |
|-----------------|--------------------------|-----------------------|---------------------------------|-----------------------|
| 1               | PhI(OAc) <sub>2</sub>    | Et <sub>3</sub> N·3HF | MeCN                            | 54                    |
| 2               | PhI(OPiv) <sub>2</sub>   | Et <sub>3</sub> N·3HF | MeCN                            | 64                    |
| 3               | PhI(OAd) <sub>2</sub>    | Et <sub>3</sub> N·3HF | MeCN                            | 56                    |
| 4               | PhI, m-CPBA <sup>c</sup> | Et <sub>3</sub> N·3HF | MeCN                            | 45                    |
| 5               | PhI(OPiv) <sub>2</sub>   | Et <sub>3</sub> N·3HF | CH <sub>2</sub> Cl <sub>2</sub> | 34                    |
| 6               | PhI(OPiv) <sub>2</sub>   | Et <sub>3</sub> N·3HF | Et <sub>2</sub> O               | 56                    |
| 7               | PhI(OPiv) <sub>2</sub>   | Et <sub>3</sub> N·3HF | PhMe                            | 68                    |
| 8               | PhI(OPiv) <sub>2</sub>   | Et <sub>3</sub> N·3HF | xylene                          | 56                    |
| 9               | PhI(OPiv) <sub>2</sub>   | Et <sub>3</sub> N·3HF | PhCl                            | 27                    |
| 10              | PhI(OPiv) <sub>2</sub>   | Et <sub>3</sub> N·3HF | PhCF <sub>3</sub>               | 32                    |
| 11              | Selectfluor              | --                    | PhMe                            | 0                     |
| 12              | Selectfluor              | Et <sub>3</sub> N·3HF | PhMe                            | 0                     |
| 13 <sup>d</sup> | PhI(OPiv) <sub>2</sub>   | Et <sub>3</sub> N·3HF | PhMe                            | 84                    |
| 14 <sup>d</sup> | PhI(OPiv) <sub>2</sub>   | Et <sub>3</sub> N·3HF | PhCl                            | 72                    |
| 15 <sup>d</sup> | PhI(OPiv) <sub>2</sub>   | Et <sub>3</sub> N·3HF | PhCF <sub>3</sub>               | 81                    |
| 16 <sup>d</sup> | PhI(OPiv) <sub>2</sub>   | Et <sub>3</sub> N·3HF | xylene                          | 79                    |
| 17 <sup>d</sup> | PhI(OPiv) <sub>2</sub>   | Et <sub>3</sub> N·3HF | MeCN                            | 65                    |

|                 |                                     |                                                |                               |                      |
|-----------------|-------------------------------------|------------------------------------------------|-------------------------------|----------------------|
| 18 <sup>d</sup> | PhI(OPiv) <sub>2</sub>              | Et <sub>3</sub> N·3HF                          | PhMe/ Et <sub>2</sub> O (2:1) | 80                   |
| 19 <sup>d</sup> | PhI(OPiv) <sub>2</sub>              | Py·HF <sup>e</sup>                             | PhMe                          | trace                |
| 20 <sup>d</sup> | PhI(OPiv) <sub>2</sub>              | BF <sub>3</sub> ·OEt <sub>2</sub> <sup>e</sup> | PhMe                          | 0                    |
| 21 <sup>d</sup> | PhI(OPiv) <sub>2</sub> <sup>f</sup> | Et <sub>3</sub> N·3HF                          | PhMe                          | 86(86 <sup>g</sup> ) |
| 22 <sup>d</sup> | PhI(OPiv) <sub>2</sub> <sup>f</sup> | Et <sub>3</sub> N·3HF <sup>h</sup>             | PhMe                          | 77                   |
| 23 <sup>d</sup> | PhI(OPiv) <sub>2</sub> <sup>f</sup> | Et <sub>3</sub> N·3HF <sup>i</sup>             | PhMe                          | 75                   |

<sup>a</sup>Reaction conditions: **1a** (0.2 mmol), oxidant (0.4 mmol), fluorinating reagent (0.6 mmol) in 3 ml solvent for 2 h. <sup>b</sup><sup>1</sup>H NMR yield with CH<sub>2</sub>Br<sub>2</sub> as internal standard. <sup>c</sup>PhI (20 mol%), m-CPBA (0.4 mmol) at -20 °C for 4 h. <sup>d</sup> Oxidant (0.4 mmol) and fluorinating reagent (0.6 mmol) stirred 5 minutes before **1a** (0.2 mmol) was added and then the mixture stirred for 2 h. <sup>e</sup>Py·HF (0.6 mmol). <sup>f</sup>oxidant (0.23 mmol). <sup>g</sup>Isolated yield. <sup>h</sup>Et<sub>3</sub>N·3HF (0.5 mmol). <sup>i</sup> Et<sub>3</sub>N·3HF (0.4 mmol).

#### 4. Optimization of reaction conditions for *N*-((2*Z*,5*E*)-5-(1-fluoroethylidene)-3-phenylthiazolidin-2-ylidene)benzamide **6a**.

A solution of oxidant and fluorinating reagent in solvent (3 mL) was stirred at room temperature for 5 minutes, then alkynyl thioureas **5a** (0.2 mmol) was added. The mixture was stirred at the room temperature for 2-12 h until **5a** was consumed. Then the reaction mixture was filtered. The filtrate was concentrated under reduced pressure and the residue was purified by flash chromatography on silica gel eluting with petroleum ether: ethyl acetate = 10:1 to give product **6a**.

**Table S1.** Optimization of the reaction conditions for **6a**<sup>a</sup>.

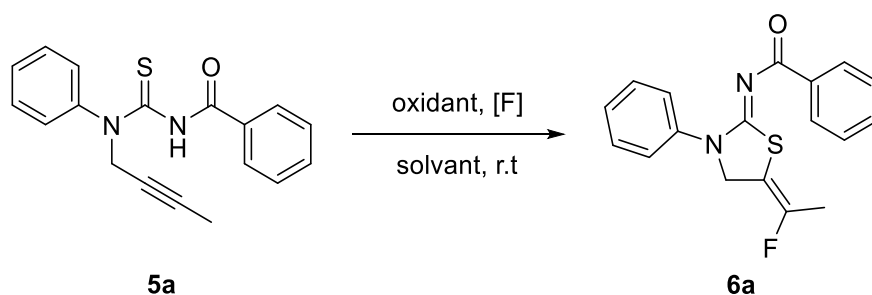

| Entry | oxidant                             | fluorinating reagent  | solvent | yield(%) <sup>b</sup> |
|-------|-------------------------------------|-----------------------|---------|-----------------------|
| 1     | PhI(OPiv) <sub>2</sub> <sup>c</sup> | Et <sub>3</sub> N·3HF | PhMe    | 46                    |
| 2     | PhI(OPiv) <sub>2</sub>              | Et <sub>3</sub> N·3HF | PhMe    | 46                    |
| 3     | PhI(OAc) <sub>2</sub>               | Et <sub>3</sub> N·3HF | PhMe    | 36                    |

|       |                                     |                                    |                                 |                      |
|-------|-------------------------------------|------------------------------------|---------------------------------|----------------------|
| 4     | PhI(OAd) <sub>2</sub>               | Et <sub>3</sub> N·3HF              | PhMe                            | 48                   |
| 5     | PhI(OPiv) <sub>2</sub> <sup>d</sup> | Et <sub>3</sub> N·3HF              | PhMe                            | 31                   |
| 6     | PhI(OPiv) <sub>2</sub>              | Et <sub>3</sub> N·3HF              | CH <sub>2</sub> Cl <sub>2</sub> | 30                   |
| 7     | PhI(OPiv) <sub>2</sub>              | Et <sub>3</sub> N·3HF              | Et <sub>2</sub> O               | 56                   |
| 8     | PhI(OPiv) <sub>2</sub>              | Et <sub>3</sub> N·3HF              | DMF                             | trace                |
| 9     | PhI(OPiv) <sub>2</sub>              | Et <sub>3</sub> N·3HF              | DMSO                            | trace                |
| 10    | PhI(OPiv) <sub>2</sub>              | Et <sub>3</sub> N·3HF              | MeCN                            | 17                   |
| 11    | PhI(OPiv) <sub>2</sub>              | Et <sub>3</sub> N·3HF              | EtOAc                           | 38                   |
| 12    | PhI(OPiv) <sub>2</sub>              | Et <sub>3</sub> N·3HF              | acetone                         | trace                |
| 13    | PhI(OPiv) <sub>2</sub>              | Et <sub>3</sub> N·3HF              | THF                             | 53                   |
| 14    | PhI(OPiv) <sub>2</sub>              | Et <sub>3</sub> N·3HF              | 1,4-dioxane                     | 77                   |
| <hr/> |                                     |                                    |                                 |                      |
| 15    | PhI(OPiv) <sub>2</sub>              | Et <sub>3</sub> N·3HF              | DME                             | 67                   |
| 16    | PhI(OPiv) <sub>2</sub>              | Et <sub>3</sub> N·3HF              | MTBE                            | 36                   |
| 17    | PhI(OPiv) <sub>2</sub>              | Et <sub>3</sub> N·3HF              | diethylacetal                   | trace                |
| 18    | PhI(OPiv) <sub>2</sub>              | py·6HF <sup>e</sup>                | 1,4-dioxane                     | 50                   |
| 19    | PhI(OPiv) <sub>2</sub> <sup>f</sup> | Et <sub>3</sub> N·3HF              | 1,4-dioxane                     | 82                   |
| 20    | PhI(OPiv) <sub>2</sub> <sup>f</sup> | Et <sub>3</sub> N·3HF <sup>g</sup> | 1,4-dioxane                     | 83                   |
| 21    | PhI(OPiv) <sub>2</sub> <sup>f</sup> | Et <sub>3</sub> N·3HF <sup>h</sup> | 1,4-dioxane                     | 92(82 <sup>i</sup> ) |

<sup>a</sup>Reaction conditions: **5a** (0.2 mmol), oxidant (0.22 mmol), fluorinating reagent (0.6 mmol) in 3 ml solvent for 2 h. <sup>b</sup><sup>1</sup>H NMR yield with CH<sub>2</sub>Br<sub>2</sub> as internal standard. <sup>c</sup>0.23 mmol PhI(OPiv)<sub>2</sub>. <sup>d</sup>0.6 mmol PhI(OPiv)<sub>2</sub>. <sup>e</sup>py·6HF (0.3 mmol). <sup>f</sup>0.21 mmol PhI(OPiv)<sub>2</sub>. <sup>g</sup>0.5 mmol Et<sub>3</sub>N·3HF. <sup>h</sup>0.7 mmol Et<sub>3</sub>N·3HF. <sup>i</sup>Isolated yield.

### 5. General procedure for synthesis of acylcarbamiimidothioate **2**.

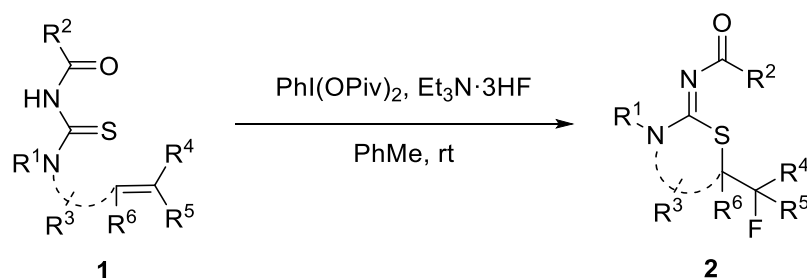

A solution of PhI(OPiv)<sub>2</sub> (0.23 mmol, 1.2 eq) and Et<sub>3</sub>N·3HF (0.6 mmol, 3 eq) in PhMe (3 mL) was stirred at room temperature for 5 minutes, then alkenyl thioureas **1** (0.2 mmol, 1 eq) was added. The mixture was stirred at the room temperature for 2 h until alkenyl thioureas **1** was consumed. Then the reaction mixture was quenched with saturated NaHCO<sub>3</sub> solution, extracted with EA, and the combined organic phases were



washed with brine, dried with anhydrous  $\text{Na}_2\text{SO}_4$  and filtered. The filtrate was concentrated under reduced pressure and the residue was purified by flash chromatography on silica gel to give product **2**.

#### 6. General procedure for synthesis of carbamothioate **4**.

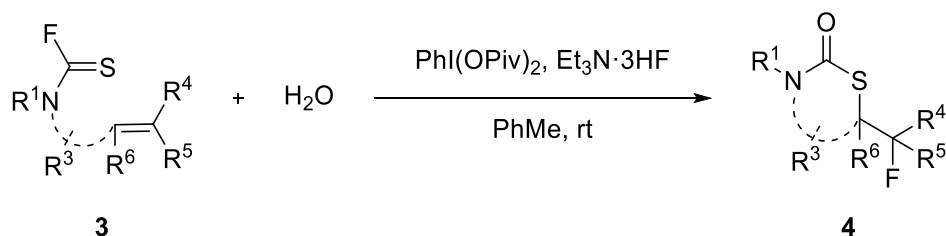

A solution of  $\text{PhI}(\text{OPiv})_2$  (0.4 mmol, 2 eq) and  $\text{Et}_3\text{N}\cdot 3\text{HF}$  (0.6 mmol, 3 eq) in PhMe (3 mL) was stirred at room temperature for 5 minutes, then thiocarbamoyl fluorides **3** (0.2 mmol, 1 eq) was added. The mixture was stirred at the room temperature for 4 h until thiocarbamoyl fluorides **3** was consumed. Then the reaction mixture was quenched with saturated  $\text{NaHCO}_3$  solution, extracted with EA, and the combined organic phases were washed with brine, dried with anhydrous  $\text{Na}_2\text{SO}_4$  and filtered. The filtrate was concentrated under reduced pressure and the residue was purified by flash chromatography on silica gel to give product **4**.

#### 7. General procedure for synthesis of carbamothioate **6**.

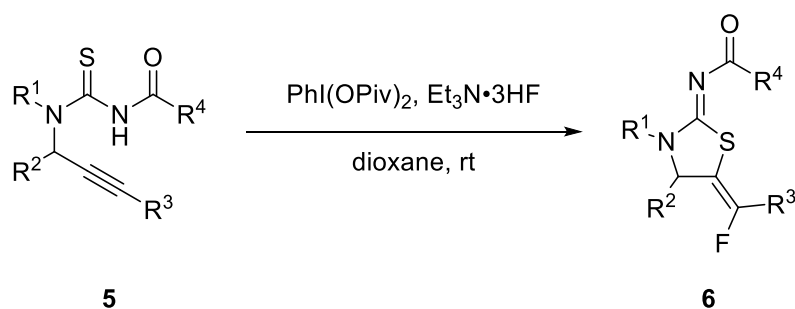

A solution of  $\text{PhI}(\text{OPiv})_2$  (0.21 mmol, 2 eq) and  $\text{Et}_3\text{N}\cdot 3\text{HF}$  (0.7 mmol, 3 eq) in dioxane (3 mL) was stirred at room temperature for 5 minutes, then alkynyl thioureas **5** (0.2 mmol, 1 eq) was added. The mixture was stirred at the room temperature for 3 h until alkynyl thioureas **5** was consumed. Then the reaction mixture was quenched with saturated  $\text{NaHCO}_3$  solution, extracted with EA, and the combined organic phases were washed with brine, dried with anhydrous  $\text{Na}_2\text{SO}_4$  and filtered. The filtrate was concentrated under reduced pressure and the residue was purified by flash chromatography on silica gel to give product **6**.

## 6. Analytical data.

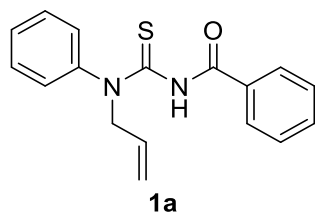

***N*-(allyl(phenyl)carbamothioyl)benzamide (1a):** Known compound<sup>[1]</sup>. The general procedure from *N*-allylaniline (669.7 mg, 5 mmol), benzoyl chloride (702.9 mg, 5 mmol), KSCN (971.8 mg, 10 mmol) and acetone (5 mL) at room temperature for 5 h, the residue was purified by column chromatography on silica gel using petroleum ether: ethyl acetate = 5:1 to give **1a** as white solid (963.1 mg, 65% yield).

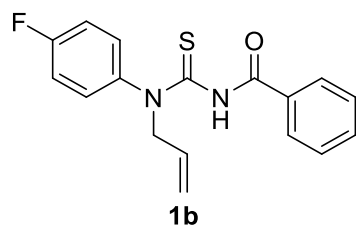

***N*-(allyl(4-fluorophenyl)carbamothioyl)benzamide (1b):** The general procedure from *N*-allyl-4-fluoroaniline (1663 mg, 11 mmol), benzoyl chloride (1546.6 mg, 11 mmol), KSCN (2138 mg, 22 mmol) and acetone (11 mL) at room temperature for 5 h, the residue was purified by column chromatography on silica gel using petroleum ether: ethyl acetate = 5:1 to give **1b** as white solid (2202.8 mg, 64% yield). Mp: 90.3-92.5 °C. <sup>1</sup>H NMR (600 MHz, CDCl<sub>3</sub>) δ 8.40 (s, 1H), 7.50 (dd, J = 18.5, 11.4 Hz, 3H), 7.41 – 7.28 (m, 4H), 7.02 (t, J = 8.3 Hz, 2H), 6.02 (m, 1H), 5.27 (dd, J = 25.8, 13.5 Hz, 2H), 5.01 – 4.73 (m, 2H). <sup>13</sup>C NMR (126 MHz, CDCl<sub>3</sub>) δ 180.9, 162.6, 161.4 (d, J = 248.4 Hz), 139.7, 132.8, 132.6, 130.5, 128.7, 127.7, 127.5, 119.4, 116.0 (d, J = 22.9 Hz), 60.1. HRMS (ESI-TOF) m/z: [M+Na]<sup>+</sup> calculated for C<sub>15</sub>H<sub>17</sub>FN<sub>2</sub>NaOS 337.0781, found 337.0780.

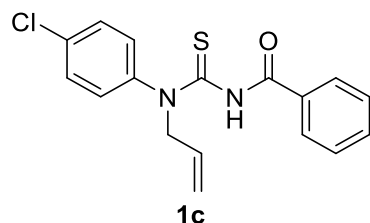

***N*-(allyl(4-chlorophenyl)carbamothioyl)benzamide (1c):** The general procedure from *N*-allyl-4-chloroaniline (2222.9 mg, 13.3 mmol), benzoyl chloride (1870 mg, 13.3 mmol), KSCN (2585 mg, 26.6 mmol) and acetone

(13 mL) at room temperature for 5 h, the residue was purified by column chromatography on silica gel using petroleum ether: ethyl acetate = 5:1 to give **1c** as white solid (2637 mg, 60% yield). Mp: 93.9-95.5 °C. <sup>1</sup>H NMR (500 MHz, CDCl<sub>3</sub>) δ 8.35 (s, 1H), 7.63 – 7.48 (m, 3H), 7.39 (t, J = 7.7 Hz, 2H), 7.32 – 7.24 (m, 4H), 6.02 (m, 1H), 5.38 – 5.22 (m, 2H), 4.86 (s, 2H). <sup>13</sup>C NMR (126 MHz, CDCl<sub>3</sub>) δ 180.9, 162.5, 142.5, 133.3, 132.8, 132.5, 130.5, 129.2, 128.7, 127.5, 127.1, 119.4, 60.1. HRMS (ESI-TOF) m/z: [M+Na]<sup>+</sup> calculated for C<sub>15</sub>H<sub>17</sub>ClN<sub>2</sub>NaOS 353.0486, found 353.0476.

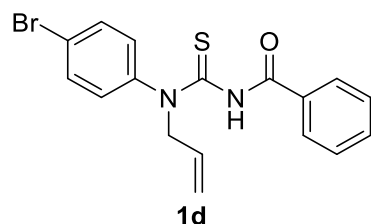

**N-(allyl(4-bromophenyl)carbamothioyl)benzamide (1d):** The general procedure from *N*-allyl-4-bromoaniline (3245 mg, 15.3 mmol), benzoyl chloride (2151.2 mg, 15.3 mmol), KSCN (2973.7 mg, 30.6 mmol) and acetone (15 mL) at room temperature for 5 h, the residue was purified by column chromatography on silica gel using petroleum ether: ethyl acetate = 5:1 to give **1d** as white solid (3999.1 mg, 70% yield). Mp: 89.9-92.3 °C. <sup>1</sup>H NMR (500 MHz, CDCl<sub>3</sub>) δ 8.34 (s, 1H), 7.64 – 7.48 (m, 3H), 7.48 – 7.34 (m, 4H), 7.23 – 7.16 (m, 2H), 6.01 (m, 1H), 5.38 – 5.21 (m, 2H), 4.86 (s, 2H). <sup>13</sup>C NMR (126 MHz, CDCl<sub>3</sub>) δ 180.9, 162.5, 143.0, 132.8, 132.4, 132.1, 130.5, 128.7, 127.5, 127.4, 121.3, 119.4, 60.0. HRMS (ESI-TOF) m/z: [M+Na]<sup>+</sup> calculated for C<sub>15</sub>H<sub>17</sub>BrN<sub>2</sub>NaOS 396.9981, found 396.9981.

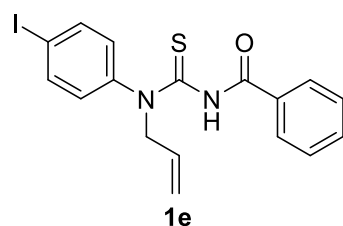

**N-(allyl(4-iodophenyl)carbamothioyl)benzamide (1e):** The general procedure from *N*-allyl-4-iodoaniline (3808.6 mg, 14.7 mmol), benzoyl chloride (2066.8 mg, 14.7 mmol), KSCN (2857.1 mg, 30.6 mmol) and acetone (15 mL) at room temperature for 5 h, the residue was purified by column chromatography on silica gel using petroleum ether: ethyl acetate = 5:1 to give **1e** as white solid (4611.9 mg, 74% yield). Mp: 105.6-109.4 °C. <sup>1</sup>H NMR (500 MHz, CDCl<sub>3</sub>) δ 8.34 (s, 1H), 7.71 – 7.61 (m, 2H), 7.61 – 7.46 (m, 3H), 7.39 (t, J = 7.7 Hz, 2H), 7.12 – 7.02 (m, 2H), 6.01 (m, 1H), 5.38 – 5.21 (m, 2H), 4.86 (s, 2H). <sup>13</sup>C NMR (126 MHz, CDCl<sub>3</sub>) δ 180.8,

162.5, 143.8, 138.1, 132.8, 132.4, 130.5, 128.7, 127.5, 119.4, 92.9, 60.0. HRMS (ESI-TOF)  $m/z$ :  $[M+Na]^+$  calculated for  $C_{15}H_{17}IN_2NaOS$  444.9842, found 444.9851.

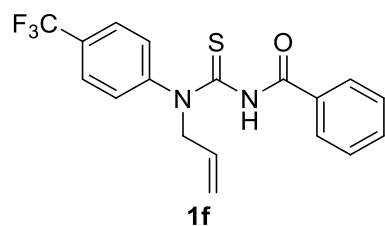

***N*-(allyl(4-(trifluoromethyl)phenyl)carbamothioyl)benzamide (1f)**: The general procedure from *N*-allyl-4-(trifluoromethyl)aniline (2454.5 mg, 12.2 mmol), benzoyl chloride (1715.3 mg, 12.2 mmol), KSCN (2371.2 mg, 24.4 mmol) and acetone (12 mL) at room temperature for 5 h, the residue was purified by column chromatography on silica gel using petroleum ether: ethyl acetate = 5:1 to give **1f** as white solid (2708.8 mg, 61% yield). Mp: 92.3-94.2 °C.  $^1H$  NMR (500 MHz,  $CDCl_3$ )  $\delta$  8.34 (s, 1H), 7.71 – 7.61 (m, 2H), 7.61 – 7.46 (m, 3H), 7.39 (t,  $J$  = 7.7 Hz, 2H), 7.12 – 7.02 (m, 2H), 6.01 (m, 1H), 5.38 – 5.21 (m, 2H), 4.86 (s, 2H).  $^{13}C$  NMR (126 MHz,  $CDCl_3$ )  $\delta$  181.3, 162.6, 147.1, 132.7, 132.1, 130.3, 129.2 (q,  $J$  = 32.9 Hz), 128.6, 127.5, 126.1, 126.0 (q,  $J$  = 3.6 Hz), 123.4 (q,  $J$  = 272.2 Hz), 119.3, 59.9. HRMS (ESI-TOF)  $m/z$ :  $[M+Na]^+$  calculated for  $C_{18}H_{15}F_3N_2NaOS$  387.0749, found 387.0748.

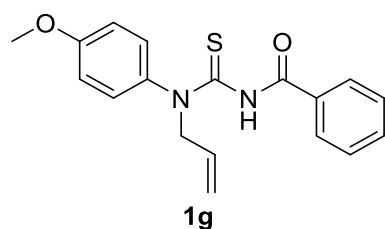

***N*-(allyl(4-methoxyphenyl)carbamothioyl)benzamide (1g)**: The general procedure from *N*-allyl-4-methoxyaniline (816.1 mg, 5 mmol), benzoyl chloride (702.9 mg, 5 mmol), KSCN (971.8 mg, 10 mmol) and acetone (5 mL) at room temperature for 5 h, the residue was purified by column chromatography on silica gel using petroleum ether: ethyl acetate = 5:1 to give **1g** as white solid (1170.8 mg, 68% yield). Mp: 93.5-96.1 °C.  $^1H$  NMR (500 MHz,  $CDCl_3$ )  $\delta$  8.38 (s, 1H), 7.64 – 7.42 (m, 3H), 7.40 – 7.24 (m, 3H), 6.98 – 6.73 (m, 3H), 6.04 (m, 1H), 5.36 – 5.20 (m, 2H), 4.88 (s, 2H), 3.77 (s, 3H).  $^{13}C$  NMR (126 MHz,  $CDCl_3$ )  $\delta$  179.7, 163.0, 160.2, 133.2, 132.6, 131.0, 130.1, 128.7, 127.4, 119.2, 118.2, 113.7, 112.0, 59.2, 55.5. HRMS (ESI-TOF)  $m/z$ :  $[M+Na]^+$  calculated for  $C_{18}H_{18}N_2NaO_2S$  367.0887, found 349.0972.

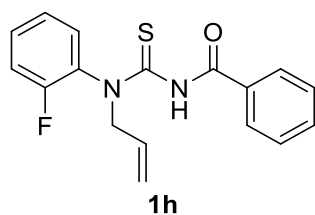

***N*-(allyl(2-fluorophenyl)carbamothioyl)benzamide (1h):** The general procedure from *N*-allyl-2-fluoroaniline (775.9 mg, 5 mmol), benzoyl chloride (702.9 mg, 5 mmol), KSCN (971.8 mg, 10 mmol) and acetone (5 mL) at room temperature for 5 h, the residue was purified by column chromatography on silica gel using petroleum ether: ethyl acetate = 5:1 to give **1h** as white solid (903.6 mg, 57% yield). Mp: 125.1-127.2 °C. <sup>1</sup>H NMR (600 MHz, CDCl<sub>3</sub>) δ 8.41 (s, 1H), 7.94 – 6.81 (m, 9H), 6.02 (dt, J = 17.0, 8.0 Hz, 1H), 5.43 – 5.14 (m, 2H), 5.08 – 4.66 (m, 2H). <sup>13</sup>C NMR (126 MHz, CDCl<sub>3</sub>) δ 181.9, 162.8, 155.9 (d, J = 252 Hz), 132.6 (q, J = 6.3 Hz), 130.3, 129.7 (d, J = 7.8 Hz), 128.7, 128.3, 127.5, 124.4, 119.6, 116.4 (d, J = 20.2 Hz), 59.2. HRMS (ESI-TOF) m/z: [M+Na]<sup>+</sup> calculated for C<sub>15</sub>H<sub>17</sub>FN<sub>2</sub>NaOS 337.0781, found 337.0772.

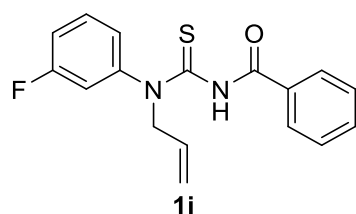

***N*-(allyl(3-fluorophenyl)carbamothioyl)benzamide (1i):** The general procedure from *N*-allyl-3-fluoroaniline (775.9 mg, 5 mmol), benzoyl chloride (702.9 mg, 5 mmol), KSCN (971.8 mg, 10 mmol) and acetone (5 mL) at room temperature for 5 h, the residue was purified by column chromatography on silica gel using petroleum ether: ethyl acetate = 5:1 to give **1i** as white solid (817.5 mg, 52% yield). Mp: 109.8-112.3 °C. <sup>1</sup>H NMR (500 MHz, CDCl<sub>3</sub>) δ 8.42 (s, 1H), 7.53 (dd, J = 37.0, 7.6 Hz, 3H), 7.44 – 7.23 (m, 3H), 7.10 (dd, J = 30.0, 8.7 Hz, 2H), 6.93 (td, J = 8.3, 2.5 Hz, 1H), 6.02 (m, 1H), 5.30 (dd, J = 32.5, 13.7 Hz, 2H), 4.88 (d, J = 5.9 Hz, 2H). <sup>13</sup>C NMR (126 MHz, CDCl<sub>3</sub>) δ 180.8, 162.4 (d, J = 249.5 Hz), 162.6, 145.3 (d, J = 9.7 Hz), 132.8, 132.6, 130.6, 130.1 (d, J = 9.1 Hz), 128.8, 127.5, 121.6, 119.4, 114.8 (d, J = 20.8 Hz), 113.4 (d, J = 23.9 Hz), 60.0. HRMS (ESI-TOF) m/z: [M+Na]<sup>+</sup> calculated for C<sub>15</sub>H<sub>17</sub>FN<sub>2</sub>NaOS 337.0781, found 337.0770.

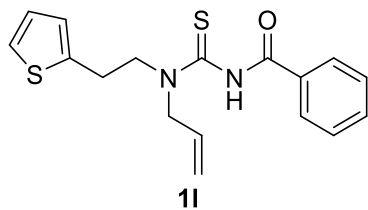

***N*-(allyl(2-(thiophen-2-yl)ethyl)carbamothioyl)benzamide (1l):** The general procedure from *N*-(2-(thiophen-2-yl)ethyl)prop-2-en-1-amine (1421.8 mg, 8.5 mmol), benzoyl chloride (1195.1 mg, 8.5 mmol), KSCN (1652.1 mg, 17 mmol) and acetone (9 mL) at room temperature for 5 h, the residue was purified by column chromatography on silica gel using petroleum ether: ethyl acetate = 10:1 to give **1l** as white solid (2321.5 mg, 71% yield). Mp: 96.4-98.1 °C. The spectra of this compound show more peaks because thioamide compounds are easy to isomerize. <sup>1</sup>H NMR (500 MHz, CDCl<sub>3</sub>) δ 8.39 (s, 2H), 8.21 (s, 1H), 7.81 (t, J = 11.5 Hz, 6H), 7.53 (dt, J = 52.7, 7.5 Hz, 9H), 7.17 (d, J = 5.2 Hz, 3H), 6.95 (s, 6H), 5.93 (s, 3H), 5.48 (d, J = 17.2 Hz, 1H), 5.36 – 5.12 (m, 5H), 4.57 (d, J = 109.6 Hz, 3H), 4.26 – 3.99 (m, 8H), 3.83 (s, 2H), 3.30 (m, 6H). <sup>13</sup>C NMR (151 MHz, CDCl<sub>3</sub>) δ 181.2, 180.4, 163.8, 140.5, 139.8, 132.9, 132.4, 132.1, 130.5, 128.8, 127.8, 127.0, 125.9, 125.6, 124.3, 123.9, 119.8, 118.7, 56.8, 56.1, 54.8, 54.2, 28.3, 26.3. HRMS (ESI-TOF) m/z: [M+Na]<sup>+</sup> calculated for C<sub>17</sub>H<sub>18</sub>N<sub>2</sub>NaOS<sub>2</sub> 3853.0753, found 353.0746.

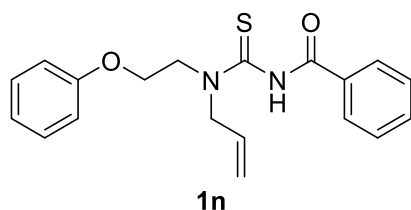

***N*-(allyl(2-phenoxyethyl)carbamothioyl)benzamide (1n):** The general procedure from *N*-(2-phenoxyethyl)prop-2-en-1-amine (1127.3 mg, 6.34 mmol), benzoyl chloride (891.4 mg, 6.34 mmol), KSCN (1232.2 mg, 12.68 mmol) and acetone (6.5 mL) at room temperature for 5 h, the residue was purified by column chromatography on silica gel using petroleum ether: ethyl acetate = 10:1 to give **1n** as purple viscous liquid (1044 mg, 48% yield). The spectra of this compound show more peaks because thioamide compounds are easy to isomerize. <sup>1</sup>H NMR (500 MHz, CDCl<sub>3</sub>) δ 8.68 (m, 1H), 7.82 (m, 2H), 7.57 (m, 1H), 7.46 (m, 2H), 7.28 (m, 2H), 7.07 – 6.79 (m, 3H), 5.99 (m, 1H), 5.52 – 5.13 (m, 2H), 4.73 (s, 1H), 4.51 – 3.87 (m, 5H). <sup>13</sup>C NMR (151 MHz, CDCl<sub>3</sub>) δ 181.3, 180.9, 164.5, 163.8, 158.3, 157.7, 133.0, 132.5, 132.2, 130.7, 129.6, 129.5, 128.8, 127.8, 121.8, 121.1, 119.8, 118.9, 114.7, 114.5, 65.9, 64.9, 57.8, 55.9, 52.4, 51.0. HRMS (ESI-TOF) m/z: [M+Na]<sup>+</sup>

calculated for  $C_{19}H_{20}N_2NaO_2S$  363.1138, found 363.1130.

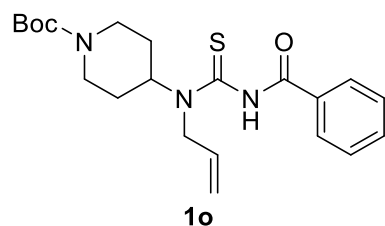

**tert-butyl 4-(1-allyl-3-benzoylthioureido)piperidine-1-carboxylate (1o):** The general procedure from tert-butyl 4-(allylamino)piperidine-1-carboxylate (2836.1 mg, 11.8 mmol), benzoyl chloride (1659.4 mg, 11.8 mmol), KSCN (2293.4 mg, 23.6 mmol) and acetone (11.8 mL) at room temperature for 5 h, the residue was purified by column chromatography on silica gel using petroleum ether: ethyl acetate = 10:1 to give **1o** as white solid (2203.2 mg, 46% yield). Mp: 133.1-135.2 °C. The spectra of this compound show more peaks because thioamide compounds are easy to isomerize.  $^1H$  NMR (500 MHz,  $CDCl_3$ )  $\delta$  8.33 (s, 1H), 7.82 (m, 2H), 7.54 (m, 3H), 5.87 (m, 1H), 5.56 – 5.02 (m, 3H), 4.59 (s, 1H), 4.19 (m, 3H), 2.74 (m, 2H), 2.00 (m, 2H), 1.76 – 1.63 (m, 2H), 1.46 (s, 9H).  $^{13}C$  NMR (151 MHz,  $CDCl_3$ )  $\delta$  181.0, 180.4, 164.1, 163.6, 154.3, 133.3, 132.7, 132.6, 132.2, 131.1, 128.5, 127.7, 117.2, 79.6, 62.0, 61.3, 50.8, 50.0, 43.0, 29.6, 28.6, 28.2. HRMS (ESI-TOF)  $m/z$ :  $[M+Na]^+$  calculated for  $C_{21}H_{29}N_3NaO_3S$  426.1822, found 426.1830.

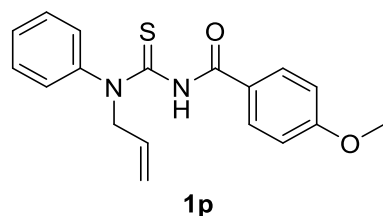

**N-(allyl(phenyl)carbamoithioyl)-4-methoxybenzamide (1p):** The general procedure from *N*-allylaniline (133.2 mg, 1 mmol), 4-methoxybenzoyl isothiocyanate (193.22 mg, 1 mmol) and THF (10 mL) at room temperature for 4 h, the residue was purified by column chromatography on silica gel using petroleum ether: ethyl acetate = 3:1 to give **1p** as white solid (296.3 mg, 91% yield). Mp: 119.2-121.3 °C.  $^1H$  NMR (500 MHz,  $CDCl_3$ )  $\delta$  8.29 (s, 1H), 7.48 (d,  $J$  = 8.6 Hz, 2H), 7.41 – 7.19 (m, 5H), 6.82 (d,  $J$  = 8.4 Hz, 2H), 6.04 (m, 1H), 5.36 – 5.19 (m, 2H), 4.89 (s, 2H), 3.80 (s, 3H).  $^{13}C$  NMR (126 MHz,  $CDCl_3$ )  $\delta$  180.4, 163.1, 162.3, 143.7, 131.0, 129.5, 129.3, 127.9, 126.0, 125.1, 119.1, 113.9, 59.6, 55.4. HRMS (ESI-TOF)  $m/z$ :  $[M+Na]^+$  calculated for  $C_{17}H_{15}IN_2NaOS$  444.9842, found 349.0971.

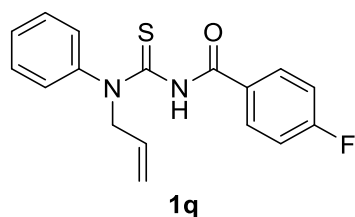

***N*-(allyl(phenyl)carbamothioyl)-4-fluorobenzamide (1q):** The general procedure from *N*-allylaniline (666.0 mg, 5 mmol), 4-fluorobenzoyl chloride (875 mg, 5 mmol), KSCN (971.8 mg, 10 mmol) and acetone (5 mL) at room temperature for 5 h, the residue was purified by column chromatography on silica gel using petroleum ether: ethyl acetate = 5:1 to give **1q** as white solid (786.6 mg, 46% yield). Mp: 79.3-81.2 °C. <sup>1</sup>H NMR (500 MHz, CDCl<sub>3</sub>) δ 8.48 (s, 1H), 7.52 (s, 2H), 7.41 – 7.19 (m, 5H), 7.01 (t, *J* = 8.2 Hz, 2H), 6.02 (m, 1H), 5.26 (m, 2H), 4.88 (s, 2H). <sup>13</sup>C NMR (126 MHz, CDCl<sub>3</sub>) δ 180.20, 165.15 (d, *J* = 254.1 Hz), 161.97, 143.42, 130.59, 130.06 (d, *J* = 9.3 Hz), 129.12, 128.91 (d, *J* = 3.1 Hz), 127.89, 125.86, 119.13, 115.64 (d, *J* = 22.1 Hz), 59.50. HRMS (ESI-TOF) *m/z*: [M+Na]<sup>+</sup> calculated for C<sub>17</sub>H<sub>15</sub>FN<sub>2</sub>NaOS 337.0781, found 337.0774

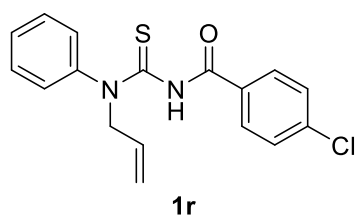

***N*-(allyl(phenyl)carbamothioyl)-4-chlorobenzamide (1r):** The general procedure from *N*-allylaniline (666.0 mg, 5 mmol), 4-chlorobenzoyl chloride (782.9 mg, 5 mmol), KSCN (971.8 mg, 10 mmol) and acetone (5 mL) at room temperature for 5 h, the residue was purified by column chromatography on silica gel using petroleum ether: ethyl acetate = 5:1 to give **1r** as white solid (757.1 mg, 46% yield). Mp: 72.1-74.2 °C. <sup>1</sup>H NMR (500 MHz, CDCl<sub>3</sub>) δ 8.27 (s, 1H), 7.51 – 7.39 (m, 2H), 7.39 – 7.21 (m, 7H), 6.03 (m, 1H), 5.37 – 5.19 (m, 2H), 4.89 (s, 2H). <sup>13</sup>C NMR (126 MHz, CDCl<sub>3</sub>) δ 180.0, 162.0, 143.4, 138.9, 131.2, 130.6, 129.2, 128.9, 128.9, 128.0, 125.9, 119.2, 59.5. HRMS (ESI-TOF) *m/z*: [M+Na]<sup>+</sup> calculated for C<sub>17</sub>H<sub>15</sub>ClN<sub>2</sub>NaOS 353.0486, found 353.0475.

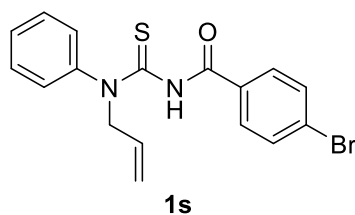

***N*-(allyl(phenyl)carbamothioyl)-4-bromobenzamide (1s):** The general procedure from *N*-allylaniline (666.0



mg, 5 mmol), 4-bromobenzoyl chloride (1097.3 mg, 5 mmol), KSCN (971.8 mg, 10 mmol) and acetone (5 mL) at room temperature for 5 h, the residue was purified by column chromatography on silica gel using petroleum ether: ethyl acetate = 5:1 to give **1s** as white solid (1138.8 mg, 61% yield). Mp: 112.2-113.1 °C. <sup>1</sup>H NMR (600 MHz, CDCl<sub>3</sub>) δ 8.28 (s, 1H), 7.48 (d, J = 8.1 Hz, 2H), 7.45 – 7.17 (m, 7H), 6.02 (m, 1H), 5.41 – 5.20 (m, 2H), 4.89 (s, 2H). <sup>13</sup>C NMR (126 MHz, CDCl<sub>3</sub>) δ 180.0, 162.2, 143.3, 131.8, 131.6, 130.5, 129.2, 129.1, 128.0, 127.4, 125.9, 119.2, 59.5. HRMS (ESI-TOF) m/z: [M+Na]<sup>+</sup> calculated for C<sub>17</sub>H<sub>15</sub>BrN<sub>2</sub>NaOS 396.9981, found 396.9977.

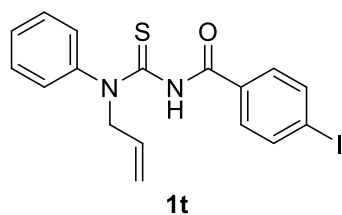

***N*-(allyl(phenyl)carbamothioyl)-4-iodobenzamide (1t)**: The general procedure from *N*-allylaniline (666.0 mg, 5 mmol), 4-iodobenzoyl chloride (1332.3 mg, 5 mmol), KSCN (971.8 mg, 10 mmol) and acetone (5 mL) at room temperature for 5 h, the residue was purified by column chromatography on silica gel using petroleum ether: ethyl acetate = 5:1 to give **1t** as white solid (1439.5 mg, 68% yield). Mp: 118.5-121.3 °C. <sup>1</sup>H NMR (600 MHz, CDCl<sub>3</sub>) δ 8.40 (s, 1H), 7.69 (d, J = 8.0 Hz, 2H), 7.47 – 7.06 (m, 7H), 6.02 (m, 1H), 5.27 (dd, J = 25.2, 13.8 Hz, 2H), 4.88 (s, 2H). <sup>13</sup>C NMR (126 MHz, CDCl<sub>3</sub>) δ 179.9, 162.4, 143.4, 137.8, 132.2, 130.6, 129.2, 128.9, 128.0, 125.9, 119.3, 100.1, 59.5. HRMS (ESI-TOF) m/z: [M+Na]<sup>+</sup> calculated for C<sub>17</sub>H<sub>15</sub>I<sub>2</sub>N<sub>2</sub>NaOS 444.9842, found 444.9846.

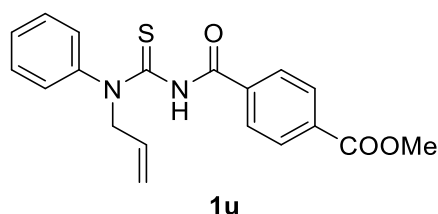

**methyl 4-((allyl(phenyl)carbamothioyl)carbamoyl)benzoate (1u)**: The general procedure from *N*-allylaniline (666.0 mg, 5 mmol), methyl 4-(chlorocarbonyl)benzoate (993 mg, 5 mmol), KSCN (971.8 mg, 10 mmol) and acetone (5 mL) at room temperature for 5 h, the residue was purified by column chromatography on silica gel using petroleum ether: ethyl acetate = 3:1 to give **1u** as white solid (1034.4 mg, 58% yield). Mp: 112.1-114.4 °C. <sup>1</sup>H NMR (500 MHz, CDCl<sub>3</sub>) δ 8.32 (s, 1H), 8.00 (d, J = 8.0 Hz, 2H), 7.55 (s, 2H), 7.38 (t, J = 7.7 Hz, 2H),

7.34 – 7.21 (m, 3H), 6.04 (m, 1H), 5.38 – 5.18 (m, 2H), 4.89 (s, 2H), 3.92 (s, 3H).  $^{13}\text{C}$  NMR (126 MHz,  $\text{CDCl}_3$ )  $\delta$  179.6, 165.9, 162.2, 143.4, 136.7, 133.6, 130.6, 129.8, 129.3, 128.2, 127.5, 126.0, 119.4, 59.6, 52.4. HRMS (ESI-TOF)  $m/z$ :  $[\text{M}+\text{Na}]^+$  calculated for  $\text{C}_{19}\text{H}_{18}\text{N}_2\text{NaO}_3\text{S}$  377.0930, found 377.0921.

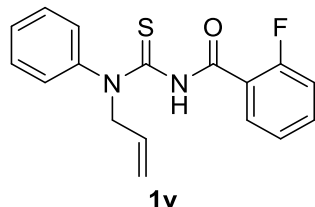

***N*-(allyl(phenyl)carbamothioyl)-2-fluorobenzamide (1v)**: The general procedure from *N*-allylaniline (666.0 mg, 5 mmol), 2-fluorobenzoyl chloride (792.8 mg, 5 mmol), KSCN (971.8 mg, 10 mmol) and acetone (5 mL) at room temperature for 5 h, the residue was purified by column chromatography on silica gel using petroleum ether: ethyl acetate = 5:1 to give **1v** as white solid (1114.7 mg, 71% yield). Mp: 103.7-106.4 °C.  $^1\text{H}$  NMR (600 MHz,  $\text{CDCl}_3$ )  $\delta$  8.73 (d,  $J$  = 13.2 Hz, 1H), 7.86 (t,  $J$  = 7.8 Hz, 1H), 7.47 – 7.38 (m, 3H), 7.33 (td,  $J$  = 7.2, 1.3 Hz, 1H), 7.31 – 7.25 (m, 2H), 7.19 (t,  $J$  = 7.6 Hz, 1H), 6.99 (dd,  $J$  = 12.1, 8.3 Hz, 1H), 6.04 (m, 1H), 5.31 – 5.16 (m, 2H), 4.99 – 4.81 (m, 2H).  $^{13}\text{C}$  NMR (126 MHz,  $\text{CDCl}_3$ )  $\delta$  178.50, 159.91 (d,  $J$  = 123.5 Hz), 159.30 (d,  $J$  = 3.4 Hz), 142.59, 134.26 (d,  $J$  = 9.3 Hz), 132.15, 130.76, 129.56, 128.36, 126.31, 124.86 (d,  $J$  = 3.2 Hz), 120.25 (d,  $J$  = 10.1 Hz), 119.18, 115.98 (d,  $J$  = 24.3 Hz), 58.84. HRMS (ESI-TOF)  $m/z$ :  $[\text{M}+\text{Na}]^+$  calculated for  $\text{C}_{17}\text{H}_{15}\text{FN}_2\text{NaOS}$  337.0781, found 337.0773.

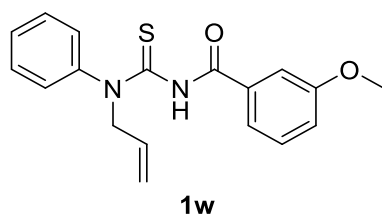

***N*-(allyl(phenyl)carbamothioyl)-3-methoxybenzamide (1w)**: The general procedure from *N*-allylaniline (666.0 mg, 5 mmol), 3-methoxybenzoyl chloride (853.0 mg, 5 mmol), KSCN (971.8 mg, 10 mmol) and acetone (5 mL) at room temperature for 5 h, the residue was purified by column chromatography on silica gel using petroleum ether: ethyl acetate = 3:1 to give **1w** as white solid (1011.5 mg, 62% yield). Mp: 106.3-108.1 °C.  $^1\text{H}$  NMR (600 MHz,  $\text{CDCl}_3$ )  $\delta$  8.33 (s, 1H), 7.44 – 7.15 (m, 6H), 7.11 – 6.89 (m, 3H), 6.04 (m, 1H), 5.27 (m, 2H), 4.89 (s, 2H), 3.76 (s, 3H).  $^{13}\text{C}$  NMR (151 MHz,  $\text{CDCl}_3$ )  $\delta$  179.9, 162.6, 159.6, 143.4, 134.1, 130.7, 129.5, 129.2, 127.9, 125.9, 119.2, 119.1, 118.9, 112.3, 59.4, 55.3. HRMS (ESI-TOF)  $m/z$ :  $[\text{M}+\text{Na}]^+$  calculated for

$C_{18}H_{18}FN_2NaO_2S$  349.0981, found 349.0971.

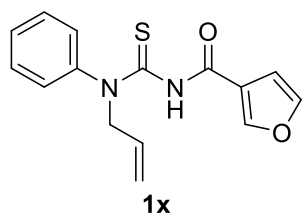

***N*-(allyl(phenyl)carbamothioyl)furan-3-carboxamide (1x)**: The general procedure from *N*-allylaniline (666.0 mg, 5 mmol), furan-3-carbonyl chloride (652.7 mg, 5 mmol), KSCN (971.8 mg, 10 mmol) and acetone (5 mL) at room temperature for 5 h, the residue was purified by column chromatography on silica gel using petroleum ether: ethyl acetate = 10:1 to give **1x** as white solid (901.4 mg, 63% yield). Mp: 97.2-98.1 °C.  $^1H$  NMR (500 MHz,  $CDCl_3$ )  $\delta$  8.57 (s, 1H), 7.62 – 7.17 (m, 6H), 7.07 (d,  $J$  = 3.7 Hz, 1H), 6.44 (d,  $J$  = 3.7 Hz, 1H), 6.02 (m, 1H), 5.24 (m, 2H), 4.88 (s, 2H).  $^{13}C$  NMR (126 MHz,  $CDCl_3$ )  $\delta$  178.2, 152.6, 146.2, 144.8, 142.9, 130.8, 129.4, 128.1, 126.1, 119.1, 116.95, 112.6, 59.0. HRMS (ESI-TOF)  $m/z$ :  $[M+Na]^+$  calculated for  $C_{15}H_{14}N_2NaO_2S$  309.0668, found 309.0661.

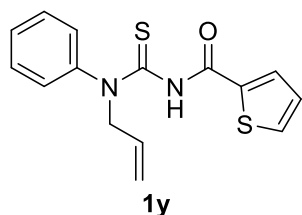

***N*-(allyl(phenyl)carbamothioyl)thiophene-2-carboxamide (1y)**: The general procedure from *N*-allylaniline (666.0 mg, 5 mmol), thiophene-2-carbonyl chloride (733 mg, 5 mmol), KSCN (971.8 mg, 10 mmol) and acetone (5 mL) at room temperature for 5 h, the residue was purified by column chromatography on silica gel using petroleum ether: ethyl acetate = 10:1 to give **1y** as white solid (899.9 mg, 60% yield). Mp: 114.2-117.3 °C.  $^1H$  NMR (500 MHz,  $CDCl_3$ )  $\delta$  8.29 (s, 1H), 7.48 (d,  $J$  = 4.9 Hz, 1H), 7.39 (t,  $J$  = 7.7 Hz, 2H), 7.28 (dd,  $J$  = 13.8, 6.2 Hz, 4H), 6.99 (t,  $J$  = 4.3 Hz, 1H), 6.03 (m, 1H), 5.42 – 5.10 (m, 2H), 4.98 – 4.71 (m, 2H).  $^{13}C$  NMR (151 MHz,  $CDCl_3$ )  $\delta$  179.1, 156.9, 143.0, 137.2, 132.2, 130.7, 129.9, 129.3, 128.0, 127.7, 126.0, 119.1, 59.1. HRMS (ESI-TOF)  $m/z$ :  $[M+Na]^+$  calculated for  $C_{15}H_{14}N_2NaOS_2$  325.0440, found 325.0431.

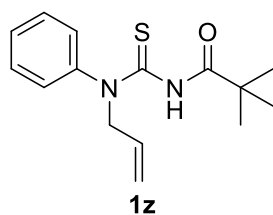

***N*-(allyl(phenyl)carbamothioyl)pivalamide (1z):** The general procedure from *N*-allylaniline (666.0 mg, 5 mmol), pivaloyl chloride (602.9 mg, 5 mmol), KSCN (971.8 mg, 10 mmol) and acetone (5 mL) at room temperature for 5 h, the residue was purified by column chromatography on silica gel using petroleum ether: ethyl acetate = 10:1 to give **1z** as white solid (931.7 mg, 67% yield). Mp: 102.3-105.9 °C. <sup>1</sup>H NMR (500 MHz, CDCl<sub>3</sub>) δ 7.81 (s, 1H), 7.38 (t, J = 7.8 Hz, 2H), 7.34 – 7.26 (m, 1H), 7.23 (dd, J = 7.4, 1.7 Hz, 2H), 6.00 (m, 1H), 5.32 – 5.17 (m, 2H), 4.84 (d, J = 6.0 Hz, 2H), 0.90 (s, 9H). <sup>13</sup>C NMR (151 MHz, CDCl<sub>3</sub>) δ 180.3, 173.2, 143.4, 130.8, 129.1, 127.9, 126.3, 119.1, 59.3, 39.6, 26.7. HRMS (ESI-TOF) m/z: [M+Na]<sup>+</sup> calculated for C<sub>15</sub>H<sub>20</sub>N<sub>2</sub>NaOS 299.1189, found 299.1184.

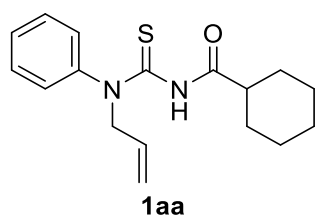

***N*-(allyl(phenyl)carbamothioyl)cyclohexanecarboxamide (1aa):** The general procedure from *N*-allylaniline (666.0 mg, 5 mmol), cyclohexanecarbonyl chloride (733.6 mg, 5 mmol), KSCN (971.8 mg, 10 mmol) and acetone (5 mL) at room temperature for 5 h, the residue was purified by column chromatography on silica gel using petroleum ether: ethyl acetate = 10:1 to give **1aa** as white solid (751.7 mg, 50% yield). Mp: 81.9-83.2 °C. <sup>1</sup>H NMR (600 MHz, CDCl<sub>3</sub>) δ 7.82 (s, 1H), 7.37 (t, J = 7.8 Hz, 2H), 7.28 (dd, J = 14.2, 6.7 Hz, 1H), 7.21 (d, J = 7.7 Hz, 2H), 5.99 (m, 1H), 5.23 (dd, J = 21.8, 13.7 Hz, 2H), 4.95 – 4.70 (m, 2H), 2.18 (tt, J = 11.5, 3.4 Hz, 1H), 1.60 (m, 5H), 1.22 – 0.96 (m, 5H). <sup>13</sup>C NMR (151 MHz, CDCl<sub>3</sub>) δ 180.6, 171.7, 143.6, 130.8, 128.9, 127.7, 126.1, 119.0, 59.5, 45.0, 28.6, 25.4, 25.1. HRMS (ESI-TOF) m/z: [M+Na]<sup>+</sup> calculated for C<sub>17</sub>H<sub>22</sub>N<sub>2</sub>NaOS 325.1351, found 325.1336.

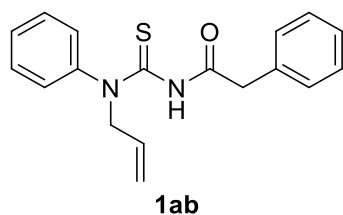

***N*-(allyl(phenyl)carbamothioyl)-2-phenylacetamide (1ab):** The general procedure from *N*-allylaniline (666.0 mg, 5 mmol), 2-phenylacetyl chloride (773.0 mg, 5 mmol), KSCN (971.8 mg, 10 mmol) and acetone (5 mL) at room temperature for 5 h, the residue was purified by column chromatography on silica gel using petroleum ether: ethyl acetate = 10:1 to give **1ab** as white solid (568.6 mg, 37% yield). Mp: 78.7-79.1 °C. <sup>1</sup>H NMR (600 MHz, CDCl<sub>3</sub>) δ 7.66 (s, 1H), 7.37 – 7.27 (m, 3H), 7.21 (q, J = 7.3 Hz, 3H), 7.11 – 6.83 (m, 4H), 5.93 (m, 1H), 5.16 (m, 2H), 4.75 (d, J = 5.6 Hz, 2H), 3.61 (s, 2H). <sup>13</sup>C NMR (126 MHz, CDCl<sub>3</sub>) δ 178.6, 167.4, 142.3, 133.0, 130.7, 129.6, 129.2, 129.0, 128.2, 127.4, 126.2, 119.2, 58.8, 44.3. HRMS (ESI-TOF) m/z: [M+Na]<sup>+</sup> calculated for C<sub>18</sub>H<sub>18</sub>N<sub>2</sub>NaOS 333.1032, found 333.1023.

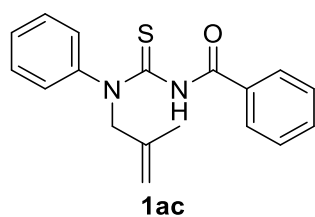

***N*-((2-methylallyl)(phenyl)carbamothioyl)benzamide (1ac):** The general procedure from *N*-(2-methylallyl)aniline (1472.2 mg, 10 mmol), benzoyl chloride (1406 mg, 10 mmol), KSCN (1943.6 mg, 20 mmol) and acetone (10 mL) at room temperature for 5 h, the residue was purified by column chromatography on silica gel using petroleum ether: ethyl acetate = 5:1 to give **1ac** as white solid (1770.8 mg, 57% yield). Mp: 121.1-123.4 °C. <sup>1</sup>H NMR (600 MHz, CDCl<sub>3</sub>) δ 8.37 (s, 1H), 7.50 (dt, J = 23.4, 7.5 Hz, 3H), 7.40 – 7.30 (m, 6H), 7.22 (t, J = 7.1 Hz, 1H), 5.12 (s, 1H), 4.99 (s, 1H), 4.90 (s, 2H), 1.86 (s, 3H). <sup>13</sup>C NMR (126 MHz, CDCl<sub>3</sub>) δ 181.0, 162.6, 144.0, 138.7, 132.7, 132.5, 128.9, 128.5, 127.6, 127.4, 125.3, 113.6, 62.4, 20.5. HRMS (ESI-TOF) m/z: [M+Na]<sup>+</sup> calculated for C<sub>18</sub>H<sub>18</sub>N<sub>2</sub>NaOS 333.1032, found 333.1022.

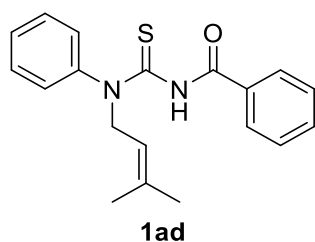

**N-((3-methylbut-2-en-1-yl)(phenyl)carbamothioyl)benzamide (1ad):** The general procedure from N-(3-methylbut-2-en-1-yl)aniline (1612.5 mg, 10 mmol), benzoyl chloride (1406 mg, 10 mmol), KSCN (1943.6 mg, 20 mmol) and acetone (10 mL) at room temperature for 5 h, the residue was purified by column chromatography on silica gel using petroleum ether: ethyl acetate = 5:1 to give **1ad** as white solid (1930.2 mg, 59% yield). Mp: 112.2-113.4 °C. <sup>1</sup>H NMR (500 MHz, CDCl<sub>3</sub>) δ 8.34 (s, 1H), 7.47 (q, J = 8.8, 7.8 Hz, 3H), 7.40 – 7.21 (m, 7H), 5.45 (t, J = 7.2 Hz, 1H), 4.87 (s, 2H), 1.69 (s, 3H), 1.44 (s, 3H). <sup>13</sup>C NMR (126 MHz, CDCl<sub>3</sub>) δ 179.4, 162.8, 143.3, 137.7, 133.0, 132.5, 129.2, 128.6, 127.9, 127.4, 126.4, 117.3, 55.0, 25.6, 17.8. HRMS (ESI-TOF) m/z: [M+Na]<sup>+</sup> calculated for C<sub>19</sub>H<sub>20</sub>N<sub>2</sub>NaOS 347.1189, found 347.1178.

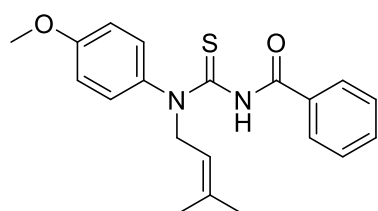

**1ae**

**N-((4-methoxyphenyl)(3-methylbut-2-en-1-yl)carbamothioyl)benzamide (1ae):** The general procedure from 4-methoxy-N-(3-methylbut-2-en-1-yl)aniline (1912.7 mg, 10 mmol), benzoyl chloride (1406 mg, 10 mmol), KSCN (1943.6 mg, 20 mmol) and acetone (10 mL) at room temperature for 5 h, the residue was purified by column chromatography on silica gel using petroleum ether: ethyl acetate = 5:1 to give **1ae** as white solid (2020.7 mg, 57% yield). Mp: 112.2-113.4 °C. <sup>1</sup>H NMR (600 MHz, CDCl<sub>3</sub>) δ 8.23 (s, 1H), 7.48 (t, J = 7.2 Hz, 3H), 7.34 (t, J = 7.7 Hz, 2H), 7.19 (d, J = 8.4 Hz, 2H), 6.86 (d, J = 8.5 Hz, 2H), 5.44 (d, J = 7.9 Hz, 1H), 4.85 (d, J = 7.0 Hz, 2H), 3.77 (s, 3H), 1.70 (s, 3H), 1.46 (s, 3H). <sup>13</sup>C NMR (151 MHz, CDCl<sub>3</sub>) δ 179.33, 162.90, 158.78, 137.55, 135.51, 133.15, 132.39, 128.56, 128.45, 127.43, 127.36, 127.30, 114.30, 55.29, 54.88, 25.59, 17.85.

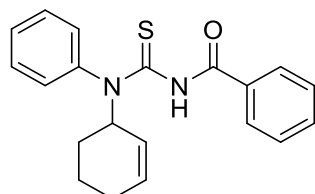

**1af**

**N-(cyclohex-2-en-1-yl)(phenyl)carbamothioyl)benzamide (1af):** The general procedure from N-(cyclohex-2-

en-1-yl)aniline (1727.0 mg, 10 mmol), benzoyl chloride (1406 mg, 10 mmol), KSCN (1943.6 mg, 20 mmol) and acetone (10 mL) at room temperature for 5 h, the residue was purified by column chromatography on silica gel using petroleum ether: ethyl acetate = 10:1 to give **1af** as white solid (2007.1 mg, 60% yield). Mp: 125.5-127.3 °C. <sup>1</sup>H NMR (600 MHz, CDCl<sub>3</sub>) δ 8.16 (s, 1H), 7.55 – 7.16 (m, 10H), 6.30 (s, 1H), 5.83 (d, J = 14.1 Hz, 2H), 2.24 – 2.07 (m, 1H), 1.99 – 1.76 (m, 2H), 1.63 (m, 2H), 1.44 (q, J = 11.6 Hz, 1H). <sup>13</sup>C NMR (126 MHz, CDCl<sub>3</sub>) δ 179.5, 163.3, 139.4, 133.3, 132.3, 131.0, 129.0, 128.7, 128.5, 128.3, 127.1, 126.9, 59.0, 26.8, 24.2, 20.8. HRMS (ESI-TOF) m/z: [M+Na]<sup>+</sup> calculated for C<sub>20</sub>H<sub>20</sub>N<sub>2</sub>NaOS 359.1189, found 359.1179.

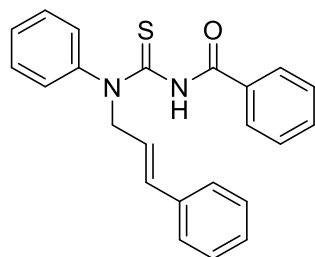

**1ag**

**N-(cinnamyl(phenyl)carbamothioyl)benzamide (1ag):** The general procedure from *N*-cinnamylaniline (1465.0 mg, 7 mmol), benzoyl chloride (984.2 mg, 7 mmol), KSCN (1360.5 mg, 14 mmol) and acetone (7 mL) at room temperature for 5 h, the residue was purified by column chromatography on silica gel using petroleum ether : ethyl acetate = 10:1 to give **1ag** as white solid (1647.2 mg, 63% yield). Mp: 121.4-123.7 °C. <sup>1</sup>H NMR (600 MHz, CDCl<sub>3</sub>) δ 8.36 (s, 1H), 7.47 (dt, J = 15.2, 7.2 Hz, 3H), 7.30 (m, 12H), 6.61 – 6.35 (m, 2H), 5.03 (s, 2H). <sup>13</sup>C NMR (151 MHz, CDCl<sub>3</sub>) δ 179.8, 162.8, 143.2, 136.4, 134.5, 133.0, 132.6, 129.4, 128.7, 128.5, 128.1, 127.8, 127.4, 126.5, 126.3, 122.0, 59.1. HRMS (ESI-TOF) m/z: [M+Na]<sup>+</sup> calculated for C<sub>23</sub>H<sub>20</sub>N<sub>2</sub>NaOS 395.1189, found 395.1186.

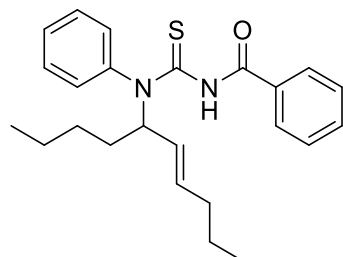

**1ah**

**(E)-N-(dec-6-en-5-yl(phenyl)carbamothioyl)benzamide (1ah):** The general procedure from (*E*)-*N*-(dec-6-en-5-yl)aniline (343.3 mg, 1.22 mmol), benzoyl isothiocyanate (199.1 mg, 1.22 mmol) and THF (12 mL) at room

temperature for 2 h, the residue was purified by column chromatography on silica gel using petroleum ether: ethyl acetate = 10:1 to give **1ah** as yellow liquid (365.4 mg, 72% yield). There is a small amount of impurities mixed in the product, but it can still be used for the next step.  $^1\text{H}$  NMR (500 MHz,  $\text{CDCl}_3$ )  $\delta$  8.07 (s, 1H), 7.29 (m, 6H), 7.22 – 7.10 (m, 4H), 6.06 (d,  $J$  = 8.1 Hz, 1H), 5.73 (dt,  $J$  = 14.8, 6.8 Hz, 1H), 5.08 (dd,  $J$  = 15.8, 7.9 Hz, 1H), 1.91 (dq,  $J$  = 14.4, 7.8, 7.2 Hz, 2H), 1.70 (dq,  $J$  = 9.6, 4.9 Hz, 1H), 1.28 (m, 6H), 0.80 (m, 8H).  $^{13}\text{C}$  NMR (126 MHz,  $\text{CDCl}_3$ )  $\delta$  179.1, 163.3, 139.2, 135.9, 133.4, 132.2, 128.9, 128.6, 128.5, 127.4, 127.1, 63.6, 34.4, 32.0, 28.2, 26.8, 22.4, 22.0, 13.9, 13.6.

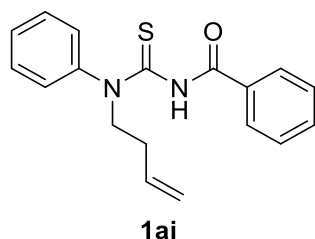

***N*-(but-3-en-1-yl(phenyl)carbamothioyl)benzamide (1ai)**: The general procedure from *N*-(but-3-en-1-yl)aniline (906.9 mg, 6.16 mmol), benzoyl chloride (866.1 mg, 6.16 mmol), KSCN (1197.3 mg, 12.32 mmol) and acetone (6.2 mL) at room temperature for 5 h, the residue was purified by column chromatography on silica gel using petroleum ether: ethyl acetate = 10:1 to give **1ai** as white solid (1057.6 mg, 55% yield). Mp: 122.3-124.3 °C.  $^1\text{H}$  NMR (600 MHz,  $\text{CDCl}_3$ )  $\delta$  8.30 (s, 1H), 7.69 – 7.15 (m, 10H), 5.82 (m, 1H), 5.10 (m, 2H), 4.34 (s, 2H), 2.56 (q,  $J$  = 7.6 Hz, 2H).  $^{13}\text{C}$  NMR (151 MHz,  $\text{CDCl}_3$ )  $\delta$  179.8, 162.7, 143.1, 134.3, 132.9, 132.5, 129.3, 128.6, 128.0, 127.4, 126.2, 117.1, 56.1, 30.6. HRMS (ESI-TOF)  $m/z$ :  $[\text{M}+\text{Na}]^+$  calculated for  $\text{C}_{18}\text{H}_{18}\text{N}_2\text{NaOS}$  333.1032, found 333.1022.

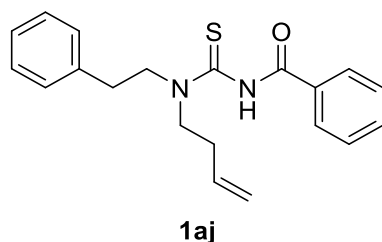

***N*-(but-3-en-1-yl(phenethyl)carbamothioyl)benzamide (1aj)**: The general procedure from *N*-phenethylbut-3-en-1-amine (1752.8 mg, 10 mmol), benzoyl chloride (1406 mg, 10 mmol), KSCN (1943.6 mg, 20 mmol) and acetone (10 mL) at room temperature for 5 h, the residue was purified by column chromatography on silica gel using petroleum ether: ethyl acetate = 10:1 to give **1aj** as white solid (2034.5 mg, 60% yield). The spectra of this compound show more peaks because thioamide compounds are easy to isomerize.  $^1\text{H}$  NMR (500 MHz,



CDCl<sub>3</sub>)  $\delta$  8.17 (d, J = 163.8 Hz, 1H), 7.78 (m, 2H), 7.52 (m, 3H), 7.40 – 7.01 (m, 6H), 6.03 – 5.57 (m, 1H), 5.15 (m, 2H), 4.10 (m, 2H), 3.69 (m, 2H), 3.07 (m, 2H), 2.75 – 2.31 (m, 2H).<sup>13</sup>C NMR (126 MHz, CDCl<sub>3</sub>)  $\delta$  180.3, 163.8, 138.3, 137.7, 134.4, 133.7, 132.8, 132.4, 128.8, 128.7, 128.5, 127.7, 126.7, 126.5, 117.9, 117.2, 55.4, 55.2, 53.4, 53.2, 34.4, 32.3, 30.4. HRMS (ESI-TOF) m/z: [M+Na]<sup>+</sup> calculated for C<sub>20</sub>H<sub>22</sub>N<sub>2</sub>NaOS 361.1345, found 361.1335.

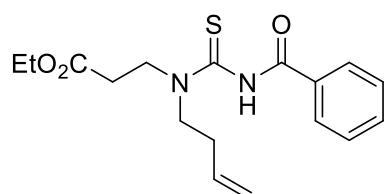

**1ak**

**ethyl 3-(3-benzoyl-1-(but-3-en-1-yl)thioureido)propanoate (1ak):** The general procedure from ethyl 3-(but-3-en-1-ylamino)propanoate (513.7 mg, 3 mmol), benzoyl isothiocyanate (489.7 mg, 3 mmol) and THF (30 mL) at room temperature for 2 h, the residue was purified by column chromatography on silica gel using petroleum ether: ethyl acetate = 10:1 to give **1ak** as white solid (602.4 mg, 60% yield). The spectra of this compound show more peaks because thioamide compounds are easy to isomerize. <sup>1</sup>H NMR (500 MHz, CDCl<sub>3</sub>)  $\delta$  8.74 (m, 1H), 7.98 – 7.73 (m, 2H), 7.52 (m, 3H), 6.05 – 5.56 (m, 1H), 5.30 – 4.98 (m, 2H), 4.33 – 4.07 (m, 3H), 3.91 (d, J = 40.0 Hz, 2H), 3.66 (s, 1H), 3.08 – 2.65 (m, 2H), 2.53 (d, J = 56.6 Hz, 2H), 1.40 – 1.14 (m, 3H).<sup>13</sup>C NMR (151 MHz, CDCl<sub>3</sub>)  $\delta$  180.7, 171.5, 164.4, 163.7, 134.3, 133.7, 132.8, 128.7, 127.8, 118.0, 117.3, 61.2, 60.8, 53.6, 52.3, 48.9, 48.2, 32.4, 31.4, 30.1, 14.0. HRMS (ESI-TOF) m/z: [M+Na]<sup>+</sup> calculated for C<sub>17</sub>H<sub>22</sub>N<sub>2</sub>NaO<sub>3</sub>S 357.1243, found 357.1234.

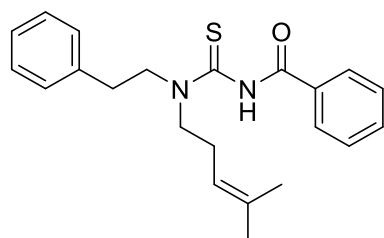

**1al**

**N-(4-methylpent-3-en-1-yl)(phenethyl)carbamothioylbenzamide (1al):** The general procedure from 4-methyl-N-phenethylpent-3-en-1-amine (610.0 mg, 3 mmol), benzoyl isothiocyanate (489.7 mg, 3 mmol) and THF (30 mL) at room temperature for 2 h, the residue was purified by column chromatography on silica gel using petroleum ether: ethyl acetate = 10:1 to give **1al** as white solid (844.8 mg, 83% yield). Mp: 72.1-74.2

°C. The spectra of this compound show more peaks because thioamide compounds are easy to isomerize. <sup>1</sup>H NMR (500 MHz, CDCl<sub>3</sub>) δ 8.27 (m, 1H), 7.94 – 6.83 (m, 10H), 5.09 (m, 1H), 4.31 – 3.39 (m, 4H), 3.07 (m, 2H), 2.75 – 2.22 (m, 2H), 1.94 – 1.44 (m, 6H). <sup>13</sup>C NMR (151 MHz, CDCl<sub>3</sub>) δ 179.9, 163.6, 138.4, 135.3, 134.9, 132.7, 132.5, 128.7, 128.5, 127.6, 126.6, 126.4, 119.6, 119.1, 55.4, 55.1, 53.7, 53.5, 34.4, 32.3, 26.8, 25.6, 24.9, 17.8, 17.6. HRMS (ESI-TOF) m/z: [M+Na]<sup>+</sup> calculated for C<sub>22</sub>H<sub>26</sub>N<sub>2</sub>NaOS 389.1658, found 389.1657.

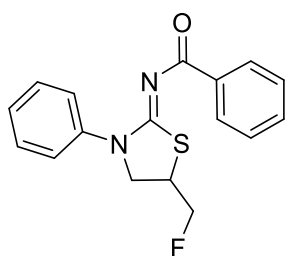

**2a**

**(Z)-N-(5-(fluoromethyl)-3-phenylthiazolidin-2-ylidene)benzamide (2a):** The general procedure from *N*-(allyl(phenyl)carbamothioyl)benzamide **1a** (59.3 mg, 0.2 mmol), PhI(OPiv)<sub>2</sub> (92.5 mg, 0.23 mmol), Et<sub>3</sub>N·3HF (96.7 mg, 0.6 mmol) and PhMe (3 mL) at room temperature for 2 h, the residue was purified by column chromatography on silica gel using petroleum ether: dichloromethane = 1:2 to give **2a** as white solid (53.9 mg, 86% yield). Mp: 100-104.3 °C. <sup>1</sup>H NMR (600 MHz, CDCl<sub>3</sub>) δ 8.26 – 8.01 (m, 2H), 7.65 – 7.43 (m, 5H), 7.35 (dt, J = 16.3, 7.4 Hz, 3H), 4.59 (dd, J = 9.6, 4.7 Hz, 0.5H), 4.51 (m, 1H), 4.43 (t, J = 9.7 Hz, 0.5H), 4.28 (dd, J = 11.1, 6.9 Hz, 1H), 4.18 (dd, J = 11.1, 2.4 Hz, 1H), 3.88 (m, 1H). <sup>13</sup>C NMR (151 MHz, CDCl<sub>3</sub>) δ 176.2, 169.1, 140.1, 136.0, 132.2, 129.8, 129.0, 128.1, 126.9, 124.7, 82.2 (d, J = 178.9 Hz), 53.4 (d, J = 3.0 Hz), 40.2 (d, J = 21.0 Hz). <sup>19</sup>F NMR (565 MHz, CDCl<sub>3</sub>) δ -211.77. HRMS (ESI-TOF) m/z: [M+Na]<sup>+</sup> calculated for C<sub>17</sub>H<sub>15</sub>FN<sub>2</sub>NaOS 337.0781, found 337.0774.

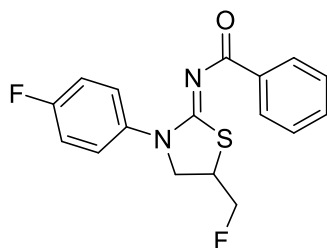

**2b**

**(Z)-N-(5-(fluoromethyl)-3-(4-fluorophenyl)thiazolidin-2-ylidene)benzamide (2b):** The general procedure from *N*-(allyl(4-fluorophenyl)carbamothioyl)benzamide **1b** (51.9 mg, 0.2 mmol), PhI(OPiv)<sub>2</sub> (92.5 mg, 0.23

mmol), Et<sub>3</sub>N·3HF (96.7 mg, 0.6 mmol) and PhMe (3 mL) at room temperature for 2 h, the residue was purified by column chromatography on silica gel using dichloromethane to give **2b** as white solid (51.9 mg, 78% yield). Mp: 90.0-92.7 °C. <sup>1</sup>H NMR (500 MHz, CDCl<sub>3</sub>) δ 8.14 – 8.04 (m, 2H), 7.47 (m, 3H), 7.37 (dd, J = 8.3, 7.0 Hz, 2H), 7.23 – 7.13 (m, 2H), 4.55 – 4.47 (m, 0.5H), 4.41 (t, J = 9.6 Hz, 1H), 4.23 (dd, J = 11.1, 6.9 Hz, 0.5H), 4.12 (dd, J = 11.1, 2.5 Hz, 1H), 3.88 (m, 1H). <sup>13</sup>C NMR (151 MHz, CDCl<sub>3</sub>) δ 176.13, 169.32, 160.88 (d, J = 247.5 Hz), 135.98, 135.85, 132.31, 129.71, 128.08, 126.63 (d, J = 8.1 Hz), 115.89 (d, J = 22.8 Hz), 82.19 (d, J = 179.0 Hz), 53.40 (d, J = 3.0 Hz), 40.27 (d, J = 20.8 Hz). <sup>19</sup>F NMR (565 MHz, CDCl<sub>3</sub>) δ -114.00, -212.24. HRMS (ESI-TOF) m/z: [M+Na]<sup>+</sup> calculated for C<sub>17</sub>H<sub>14</sub>F<sub>2</sub>N<sub>2</sub>NaOS 355.0687, found 355.0676.

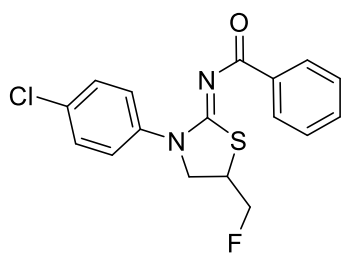

**2c**

**(Z)-N-(3-(4-chlorophenyl)-5-(fluoromethyl)thiazolidin-2-ylidene)benzamide (2c):** The general procedure from *N*-(allyl(4-chlorophenyl)carbamothioyl)benzamide **1c** (66.2 mg, 0.2 mmol), PhI(OPiv)<sub>2</sub> (92.5 mg, 0.23 mmol), Et<sub>3</sub>N·3HF (96.7 mg, 0.6 mmol) and PhMe (3 mL) at room temperature for 2 h, the residue was purified by column chromatography on silica gel using dichloromethane to give **2c** as white solid (51.6 mg, 74% yield). Mp: 120.5-127.2 °C. <sup>1</sup>H NMR (500 MHz, CDCl<sub>3</sub>) δ 8.16 – 8.04 (m, 2H), 7.53 – 7.42 (m, 5H), 7.38 (dd, J = 8.4, 7.0 Hz, 2H), 4.58 (dd, J = 9.6, 4.7 Hz, 0.5H), 4.55 – 4.45 (m, 1H), 4.40 (t, J = 9.6 Hz, 0.5H), 4.23 (dd, J = 11.1, 7.0 Hz, 1H), 4.11 (dd, J = 11.0, 2.6 Hz, 1H), 3.87 (m, 1H). <sup>13</sup>C NMR (126 MHz, CDCl<sub>3</sub>) δ 176.1, 169.1, 138.5, 135.8, 132.4, 132.1, 129.7, 129.0, 128.1, 125.8, 82.1 (d, J = 179.3 Hz), 53.1 (d, J = 3.1 Hz), 40.2 (d, J = 21.0 Hz). <sup>19</sup>F NMR (565 MHz, CDCl<sub>3</sub>) δ -212.26. HRMS (ESI-TOF) m/z: [M+Na]<sup>+</sup> calculated for C<sub>17</sub>H<sub>14</sub>ClF<sub>2</sub>N<sub>2</sub>NaOS 371.0392, found 371.0386.

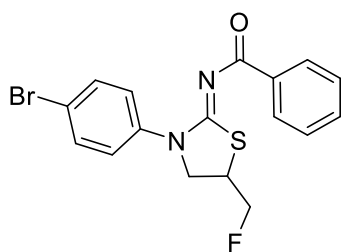

**2d**

**(Z)-N-(3-(4-bromophenyl)-5-(fluoromethyl)thiazolidin-2-ylidene)benzamide (2d):** The general procedure from *N*-(allyl(4-bromophenyl)carbamothioyl)benzamide **1d** (75.1 mg, 0.2 mmol),  $\text{PhI(OPiv)}_2$  (92.5 mg, 0.23 mmol),  $\text{Et}_3\text{N}\cdot 3\text{HF}$  (96.7 mg, 0.6 mmol) and PhMe (3 mL) at room temperature for 2 h, the residue was purified by column chromatography on silica gel using dichloromethane to give **2d** as white solid (56.5 mg, 72% yield). Mp: 84.9-89.1 °C.  $^1\text{H}$  NMR (500 MHz,  $\text{CDCl}_3$ )  $\delta$  8.10 (dd,  $J = 8.3, 1.4$  Hz, 2H), 7.60 (d,  $J = 8.7$  Hz, 2H), 7.53 – 7.45 (m, 1H), 7.45 – 7.33 (m, 4H), 4.59 (dd,  $J = 9.6, 4.7$  Hz, 0.5H), 4.49 (m, 1H), 4.40 (t,  $J = 9.6$  Hz, 0.5H), 4.24 (dd,  $J = 11.0, 7.0$  Hz, 1H), 4.12 (dd,  $J = 11.0, 2.5$  Hz, 1H), 3.87 (m, 1H).  $^{13}\text{C}$  NMR (126 MHz,  $\text{CDCl}_3$ )  $\delta$  176.1, 169.1, 139.1, 135.8, 132.4, 132.0, 129.8, 128.14 126.1, 120.0, 82.1 (d,  $J = 179.2$  Hz), 53.0 (d,  $J = 3.0$  Hz), 40.2 (d,  $J = 20.9$  Hz).  $^{19}\text{F}$  NMR (565 MHz,  $\text{CDCl}_3$ )  $\delta$  -212.17. HRMS (ESI-TOF)  $m/z$ :  $[\text{M}+\text{Na}]^+$  calculated for  $\text{C}_{17}\text{H}_{14}\text{BrFN}_2\text{NaOS}$  414.9886, found 414.9883.

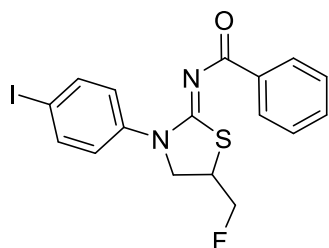

**2e**

**(Z)-N-(5-(fluoromethyl)-3-(4-iodophenyl)thiazolidin-2-ylidene)benzamide (2e):** The general procedure from *N*-(allyl(4-iodophenyl)carbamothioyl)benzamide **1e** (84.5 mg, 0.2 mmol),  $\text{PhI(OPiv)}_2$  (92.5 mg, 0.23 mmol),  $\text{Et}_3\text{N}\cdot 3\text{HF}$  (96.7 mg, 0.6 mmol) and PhMe (3 mL) at room temperature for 2 h, the residue was purified by column chromatography on silica gel using dichloromethane to give **2e** as white solid (74.6 mg, 85% yield). Mp: 98.1-102.4 °C.  $^1\text{H}$  NMR (500 MHz,  $\text{CDCl}_3$ )  $\delta$  8.10 (dd,  $J = 8.3, 1.4$  Hz, 2H), 7.83 – 7.74 (m, 2H), 7.52 – 7.45 (m, 1H), 7.43 – 7.35 (m, 2H), 7.35 – 7.26 (m, 2H), 4.57 (dd,  $J = 9.6, 4.7$  Hz, 0.5H), 4.48 (m, 1H), 4.38 (t,  $J = 9.6$  Hz, 0.5H), 4.22 (dd,  $J = 11.0, 7.0$  Hz, 1H), 4.10 (dd,  $J = 11.0, 2.6$  Hz, 1H), 3.92 – 3.80 (m, 1H).  $^{13}\text{C}$  NMR (151 MHz,  $\text{CDCl}_3$ )  $\delta$  176.1, 169.0, 139.7, 137.9, 135.7, 132.4, 129.7, 128.1, 126.2, 91.1, 82.1 (d,  $J = 179.2$  Hz), 52.9 (d,  $J = 3.0$  Hz), 40.2 (d,  $J = 21.0$  Hz).  $^{19}\text{F}$  NMR (565 MHz,  $\text{CDCl}_3$ )  $\delta$  -212.19. HRMS (ESI-TOF)  $m/z$ :  $[\text{M}+\text{Na}]^+$  calculated for  $\text{C}_{17}\text{H}_{14}\text{IFN}_2\text{NaOS}$  462.9748, found 462.9760.

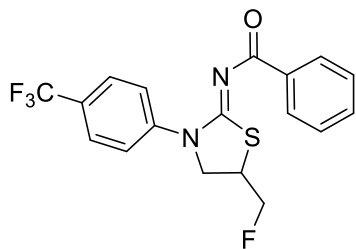

**2f**

**(Z)-N-(5-(fluoromethyl)-3-(4-(trifluoromethyl)phenyl)thiazolidin-2-ylidene)benzamide (2f):** The general procedure from *N*-(allyl(4-(trifluoromethyl)phenyl)carbamothioyl)benzamide **1f** (72.9 mg, 0.2 mmol),  $\text{PhI}(\text{OPiv})_2$  (92.5 mg, 0.23 mmol),  $\text{Et}_3\text{N}\cdot 3\text{HF}$  (96.7 mg, 0.6 mmol) and PhMe (3 mL) at room temperature for 2 h, the residue was purified by column chromatography on silica gel using dichloromethane to give **2f** as white solid (60.8 mg, 87% yield). Mp: 126.7-127.7 °C.  $^1\text{H}$  NMR (500 MHz,  $\text{CDCl}_3$ )  $\delta$  8.17 – 8.07 (m, 2H), 7.80 – 7.66 (m, 4H), 7.54 – 7.46 (m, 1H), 7.40 (dd,  $J = 8.3, 7.0$  Hz, 2H), 4.59 (dd,  $J = 9.6, 4.7$  Hz, 0.5H), 4.50 (m, 1H), 4.40 (t,  $J = 9.6$  Hz, 0.5H), 4.30 (dd,  $J = 10.9, 6.9$  Hz, 1H), 4.17 (dd,  $J = 10.9, 2.6$  Hz, 1H), 3.89 (m, Hz, 1H).  $^{13}\text{C}$  NMR (126 MHz,  $\text{CDCl}_3$ )  $\delta$  176.2, 169.3, 143.0, 135.6, 132.6, 129.8, 128.2 (q,  $J = 32.8$  Hz), 128.2, 126.0 (q,  $J = 3.7$  Hz), 123.8 (q,  $J = 272.2$  Hz), 124.3, 82.1 (d,  $J = 179.4$  Hz), 52.8 (d,  $J = 3.1$  Hz), 40.2 (d,  $J = 21.0$  Hz).  $^{19}\text{F}$  NMR (565 MHz,  $\text{CDCl}_3$ )  $\delta$  -62.31, -212.45. HRMS (ESI-TOF)  $m/z$ :  $[\text{M}+\text{Na}]^+$  calculated for  $\text{C}_{18}\text{H}_{14}\text{F}_4\text{N}_2\text{NaOS}$  405.0655, found 405.0653.

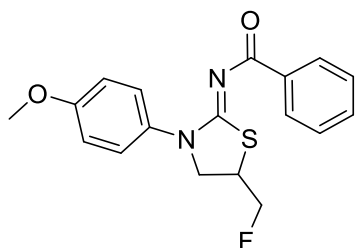

**2g**

**(Z)-N-(5-(fluoromethyl)-3-(4-methoxyphenyl)thiazolidin-2-ylidene)benzamide (2g):** The general procedure from *N*-(allyl(4-methoxyphenyl)carbamothioyl)benzamide **1g** (65.3 mg, 0.2 mmol),  $\text{PhI}(\text{OPiv})_2$  (92.5 mg, 0.23 mmol),  $\text{Et}_3\text{N}\cdot 3\text{HF}$  (96.7 mg, 0.6 mmol) and PhMe (3 mL) at room temperature for 2 h, the residue was purified by column chromatography on silica gel using dichloromethane to give **2g** as yellow liquid (22.4 mg, 33% yield).  $^1\text{H}$  NMR (500 MHz,  $\text{CDCl}_3$ )  $\delta$  8.10 (dd,  $J = 8.3, 1.4$  Hz, 2H), 7.83 – 7.74 (m, 2H), 7.52 – 7.45 (m, 1H), 7.43 – 7.35 (m, 2H), 7.35 – 7.26 (m, 2H), 4.57 (dd,  $J = 9.6, 4.7$  Hz, 0.5H), 4.48 (m, 1H), 4.38 (t,  $J = 9.6$  Hz, 0.5H), 4.22

(dd,  $J = 11.0, 7.0$  Hz, 1H), 4.10 (dd,  $J = 11.0, 2.6$  Hz, 1H), 3.92 – 3.80 (m, 1H).  $^{13}\text{C}$  NMR (151 MHz,  $\text{CDCl}_3$ )  $\delta$  176.1, 169.0, 139.7, 137.9, 135.7, 132.4, 129.7, 128.1, 126.2, 91.1, 82.1 (d,  $J = 179.2$  Hz), 52.9 (d,  $J = 3.0$  Hz), 40.2 (d,  $J = 21.0$  Hz).  $^{19}\text{F}$  NMR (565 MHz,  $\text{CDCl}_3$ )  $\delta$  -212.19. HRMS (ESI-TOF)  $m/z$ :  $[\text{M}+\text{Na}]^+$  calculated for  $\text{C}_{17}\text{H}_{14}\text{FN}_2\text{NaOS}$  462.9748, found 462.9760.

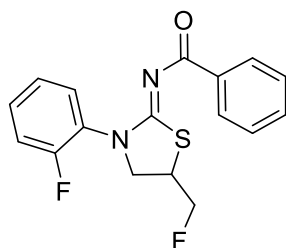

**2h**

**(Z)-N-(5-(fluoromethyl)-3-(2-fluorophenyl)thiazolidin-2-ylidene)benzamide (2h):** The general procedure from *N*-(allyl(2-fluorophenyl)carbamothioyl)benzamide **1h** (62.9 mg, 0.2 mmol),  $\text{PhI}(\text{OPiv})_2$  (92.5 mg, 0.23 mmol),  $\text{Et}_3\text{N}\cdot 3\text{HF}$  (96.7 mg, 0.6 mmol) and PhMe (3 mL) at room temperature for 2 h, the residue was purified by column chromatography on silica gel using dichloromethane to give **2h** as yellow liquid (47.5 mg, 72% yield).  $^1\text{H}$  NMR (500 MHz,  $\text{CDCl}_3$ )  $\delta$  8.03 (dd,  $J = 8.3, 1.4$  Hz, 2H), 7.53 – 7.36 (m, 3H), 7.36 – 7.21 (m, 4H), 4.62 – 4.54 (m, 1H), 4.53 – 4.44 (m, 1H), 4.18 (dd,  $J = 11.1, 6.9$  Hz, 1H), 4.08 (dd,  $J = 11.1, 2.2$  Hz, 1H), 3.92 (m, 1H).  $^{13}\text{C}$  NMR (151 MHz,  $\text{CDCl}_3$ )  $\delta$  176.2, 169.9, 157.3 (d,  $J = 251.3$  Hz), 135.8, 132.2, 129.8, 129.6 (d,  $J = 7.8$  Hz), 128.8, 128.0, 127.4 (d,  $J = 11.8$  Hz), 124.5 (d,  $J = 3.7$  Hz), 116.8 (d,  $J = 19.9$  Hz), 82.1 (d,  $J = 179.0$  Hz), 52.6 (t,  $J = 2.9$  Hz), 41.2 (d,  $J = 21.1$  Hz).  $^{19}\text{F}$  NMR (565 MHz,  $\text{CDCl}_3$ )  $\delta$  -119.45, -211.73. HRMS (ESI-TOF)  $m/z$ :  $[\text{M}+\text{Na}]^+$  calculated for  $\text{C}_{17}\text{H}_{14}\text{F}_2\text{N}_2\text{NaOS}$  355.0687, found 355.0682.

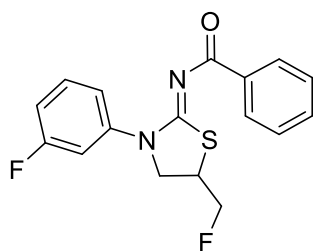

**2i**

**(Z)-N-(5-(fluoromethyl)-3-(3-fluorophenyl)thiazolidin-2-ylidene)benzamide (2i):** The general procedure from *N*-(allyl(3-fluorophenyl)carbamothioyl)benzamide **1i** (62.9 mg, 0.2 mmol),  $\text{PhI}(\text{OPiv})_2$  (92.5 mg, 0.23 mmol),  $\text{Et}_3\text{N}\cdot 3\text{HF}$  (96.7 mg, 0.6 mmol) and PhMe (3 mL) at room temperature for 2 h, the residue was purified

by column chromatography on silica gel using dichloromethane to give **2i** as yellow liquid (54.7 mg, 86% yield).

$^1\text{H}$  NMR (500 MHz,  $\text{CDCl}_3$ )  $\delta$  8.18 – 8.09 (m, 2H), 7.54 – 7.35 (m, 5H), 7.30 (dd,  $J = 8.2, 2.1$  Hz, 1H), 7.04 (td,  $J = 8.2, 2.5$  Hz, 1H), 4.59 (dd,  $J = 9.6, 4.7$  Hz, 0.5H), 4.50 (m, 1H), 4.40 (t,  $J = 9.6$  Hz, 0.5H), 4.26 (dd,  $J = 11.0, 6.9$  Hz, 1H), 4.16 (dd,  $J = 11.0, 2.5$  Hz, 1H), 3.88 (m, Hz, 1H).  $^{13}\text{C}$  NMR (151 MHz,  $\text{CDCl}_3$ )  $\delta$  176.20, 169.10, 162.62 (d,  $J = 246.8$  Hz), 141.36 (d,  $J = 10.0$  Hz), 135.77, 132.43, 130.03 (d,  $J = 9.2$  Hz), 129.79, 128.16, 119.64 (d,  $J = 3.2$  Hz), 113.61 (d,  $J = 21.1$  Hz), 112.20 (d,  $J = 24.9$  Hz), 82.11 (d,  $J = 179.3$  Hz), 53.10 (d,  $J = 3.0$  Hz), 40.15 (d,  $J = 20.9$  Hz).  $^{19}\text{F}$  NMR (565 MHz,  $\text{CDCl}_3$ )  $\delta$  -111.16, -212.12. HRMS (ESI-TOF)  $m/z$ :  $[\text{M}+\text{Na}]^+$  calculated for  $\text{C}_{17}\text{H}_{14}\text{F}_2\text{N}_2\text{NaOS}$  355.0687, found 355.0677.

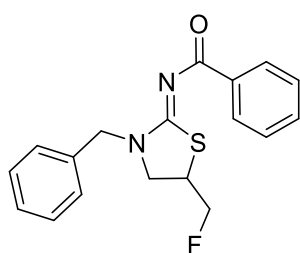

**2j**

**(Z)-N-(3-benzyl-5-(fluoromethyl)thiazolidin-2-ylidene)benzamide (2j):** The general procedure from *N*-(allyl(benzyl)carbamothioyl)benzamide **1j** (62.1 mg, 0.2 mmol),  $\text{PhI}(\text{OPiv})_2$  (92.5 mg, 0.23 mmol),  $\text{Et}_3\text{N}\cdot 3\text{HF}$  (96.7 mg, 0.6 mmol) and  $\text{PhMe}$  (3 mL) at room temperature for 2 h, the residue was purified by column chromatography on silica gel using dichloromethane to give **2j** as white solid (40.8 mg, 62% yield). Mp: 122.2–125.8 °C.  $^1\text{H}$  NMR (500 MHz,  $\text{CDCl}_3$ )  $\delta$  8.34 – 8.27 (m, 2H), 7.55 – 7.47 (m, 1H), 7.43 (dd,  $J = 8.3, 6.8$  Hz, 2H), 7.40 – 7.30 (m, 5H), 5.06 – 4.94 (m, 2H), 4.41 (m, 1H), 4.25 (dt,  $J = 47.6, 9.6$  Hz, 1H), 3.75 (m, 1H), 3.70 – 3.60 (m, 2H).  $^{13}\text{C}$  NMR (151 MHz,  $\text{CDCl}_3$ )  $\delta$  176.0, 170.2, 136.3, 135.4, 132.1, 129.7, 129.0, 128.2, 128.2, 128.1, 82.5 (d,  $J = 178.8$  Hz), 51.3, 50.2 (d,  $J = 3.1$  Hz), 40.3 (d,  $J = 20.7$  Hz).  $^{19}\text{F}$  NMR (565 MHz,  $\text{CDCl}_3$ )  $\delta$  -212.12. HRMS (ESI-TOF)  $m/z$ :  $[\text{M}+\text{Na}]^+$  calculated for  $\text{C}_{18}\text{H}_{17}\text{FN}_2\text{NaOS}$  351.0938, found 351.0935.

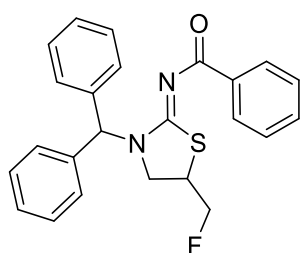

**2k**

**(Z)-N-(3-benzhydryl-5-(fluoromethyl)thiazolidin-2-ylidene)benzamide (3k):** The general procedure from *N*-(allyl(benzhydryl)carbamothioyl)benzamide **1k** (77.3 mg, 0.2 mmol), PhI(OPiv)<sub>2</sub> (92.5 mg, 0.23 mmol), Et<sub>3</sub>N·3HF (96.7 mg, 0.6 mmol) and PhMe (3 mL) at room temperature for 2 h, the residue was purified by column chromatography on silica gel using dichloromethane to give **2k** as white solid (52.8 mg, 65% yield). Mp: 122.7-124.0 °C. <sup>1</sup>H NMR (500 MHz, CDCl<sub>3</sub>) δ 8.30 – 8.15 (m, 2H), 7.52 – 7.45 (m, 1H), 7.44 – 7.26 (m, 13H), 4.48 (dd, J = 9.6, 4.9 Hz, 0.5H), 4.44 – 4.32 (m, 1H), 4.26 (t, J = 9.6 Hz, 0.5H), 3.73 (m, 1H), 3.63 (dd, J = 11.5, 2.9 Hz, 1H), 3.54 (dd, J = 11.6, 7.4 Hz, 1H). <sup>13</sup>C NMR (126 MHz, CDCl<sub>3</sub>) δ 176.0, 170.3, 137.8, 137.0, 136.2, 132.1, 129.7, 129.0, 128.8, 128.8, 128.2, 128.1, 128.0, 128.0, 82.4 (d, J = 179.0 Hz), 63.5, 48.0 (d, J = 2.9 Hz), 40.3 (d, J = 21.0 Hz). <sup>19</sup>F NMR (565 MHz, CDCl<sub>3</sub>) δ -212.21. HRMS (ESI-TOF) m/z: [M+Na]<sup>+</sup> calculated for C<sub>24</sub>H<sub>21</sub>FN<sub>2</sub>NaOS 427.1251, found 427.1253.

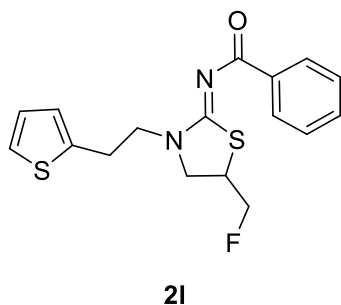

**(Z)-N-(5-(fluoromethyl)-3-(2-(thiophen-2-yl)ethyl)thiazolidin-2-ylidene)benzamide (2l):** The general procedure from *N*-(allyl(2-(thiophen-2-yl)ethyl)carbamothioyl)benzamide **1l** (66.1 mg, 0.2 mmol), PhI(OPiv)<sub>2</sub> (92.5 mg, 0.23 mmol), Et<sub>3</sub>N·3HF (96.7 mg, 0.6 mmol) and PhMe (3 mL) at room temperature for 2 h, the residue was purified by column chromatography on silica gel using dichloromethane to give **2l** as yellow liquid (36.6 mg, 53% yield). <sup>1</sup>H NMR (500 MHz, CDCl<sub>3</sub>) δ 8.35 – 8.23 (m, 2H), 7.56 – 7.47 (m, 1H), 7.44 (dd, J = 8.2, 6.8 Hz, 2H), 7.19 (dd, J = 5.1, 1.2 Hz, 1H), 6.95 (dd, J = 5.2, 3.4 Hz, 1H), 6.89 (dd, J = 3.4, 1.2 Hz, 1H), 4.34 (m, 1H), 4.22 – 4.04 (m, 2H), 3.93 (dt, J = 13.7, 6.9 Hz, 1H), 3.74 – 3.65 (m, 1H), 3.65 – 3.59 (m, 2H), 3.31 (td, J = 7.1, 4.8 Hz, 2H). <sup>13</sup>C NMR (151 MHz, CDCl<sub>3</sub>) δ 175.8, 169.5, 140.4, 136.3, 132.1, 129.7, 128.1, 127.2, 125.8, 124.4, 82.4 (d, J = 178.7 Hz), 51.6 (d, J = 3.0 Hz), 49.5, 40.5 (d, J = 21.0 Hz), 27.6. <sup>19</sup>F NMR (565 MHz, CDCl<sub>3</sub>) δ -212.52. HRMS (ESI-TOF) m/z: [M+Na]<sup>+</sup> calculated for C<sub>17</sub>H<sub>17</sub>FN<sub>2</sub>NaOS<sub>2</sub> 371.0659, found 371.0648.



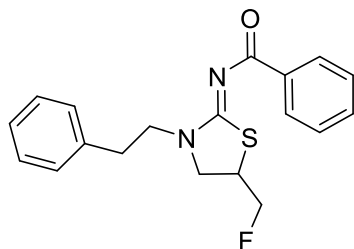

**2m**

**(Z)-N-(5-(fluoromethyl)-3-phenethylthiazolidin-2-ylidene)benzamide (2m):** The general procedure from *N*-(allyl(phenethyl)carbamothioyl)benzamide **1m** (64.9 mg, 0.2 mmol),  $\text{PhI}(\text{OPiv})_2$  (92.5 mg, 0.23 mmol),  $\text{Et}_3\text{N}\cdot 3\text{HF}$  (96.7 mg, 0.6 mmol) and PhMe (3 mL) at room temperature for 2 h, the residue was purified by column chromatography on silica gel using dichloromethane to give **2m** as white solid (47.6 mg, 70% yield). Mp: 72.8-73.4 °C.  $^1\text{H}$  NMR (600 MHz,  $\text{CDCl}_3$ )  $\delta$  8.35 – 8.24 (m, 2H), 7.52 (td,  $J = 7.1, 1.4$  Hz, 1H), 7.49 – 7.41 (m, 2H), 7.33 (t,  $J = 7.6$  Hz, 2H), 7.29 – 7.19 (m, 3H), 4.31 (m, 1H), 4.15 – 3.99 (m, 2H), 3.91 (m, 1H), 3.72 – 3.62 (m, 1H), 3.62 – 3.49 (m, 2H), 3.08 (dq,  $J = 13.4, 6.3$  Hz, 2H).  $^{13}\text{C}$  NMR (151 MHz,  $\text{CDCl}_3$ )  $\delta$  175.8, 169.4, 138.1, 136.4, 132.0, 129.6, 128.8, 128.0, 126.8, 82.3 (d,  $J = 178.6$  Hz), 51.5 (d,  $J = 2.9$  Hz), 49.2, 40.3 (d,  $J = 20.9$  Hz), 33.4.  $^{19}\text{F}$  NMR (565 MHz,  $\text{CDCl}_3$ )  $\delta$  -211.44. HRMS (ESI-TOF)  $m/z$ :  $[\text{M}+\text{H}]^+$  calculated for  $\text{C}_{19}\text{H}_{20}\text{FN}_2\text{OS}$  343.1275, found 343.1254.

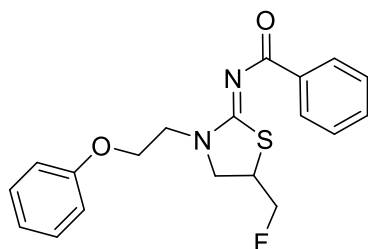

**2n**

**(Z)-N-(5-(fluoromethyl)-3-(2-phenoxyethyl)thiazolidin-2-ylidene)benzamide (2n):** The general procedure from *N*-(allyl(2-phenoxyethyl)carbamothioyl)benzamide **1n** (68.1 mg, 0.2 mmol),  $\text{PhI}(\text{OPiv})_2$  (92.5 mg, 0.23 mmol),  $\text{Et}_3\text{N}\cdot 3\text{HF}$  (96.7 mg, 0.6 mmol) and PhMe (3 mL) at room temperature for 2 h, the residue was purified by column chromatography on silica gel using dichloromethane to give **2n** as yellow liquid (59.7 mg, 83% yield).  $^1\text{H}$  NMR (500 MHz,  $\text{CDCl}_3$ )  $\delta$  8.24 (d,  $J = 7.6$  Hz, 2H), 7.50 (t,  $J = 7.3$  Hz, 1H), 7.42 (t,  $J = 7.5$  Hz, 2H), 7.29 (t,  $J = 7.7$  Hz, 2H), 6.97 (t,  $J = 7.4$  Hz, 1H), 6.91 (d,  $J = 8.0$  Hz, 2H), 4.48 – 4.16 (m, 5H), 4.13 – 4.01 (m, 2H), 3.98 (dd,  $J = 11.5, 7.1$  Hz, 1H), 3.77 (m, 1H).  $^{13}\text{C}$  NMR (151 MHz,  $\text{CDCl}_3$ )  $\delta$  175.8, 169.7, 158.1, 136.3, 132.1, 129.7,

129.7, 128.1, 121.4, 114.4, 82.3 (d, J = 178.7 Hz), 65.7, 52.7 (d, J = 2.8 Hz), 47.3, 40.8 (d, J = 21.0 Hz). <sup>19</sup>F NMR (565 MHz, CDCl<sub>3</sub>) δ -211.51. HRMS (ESI-TOF) m/z: [M+Na]<sup>+</sup> calculated for C<sub>19</sub>H<sub>19</sub>FN<sub>2</sub>NaO<sub>2</sub>S 381.1043, found 381.1047.

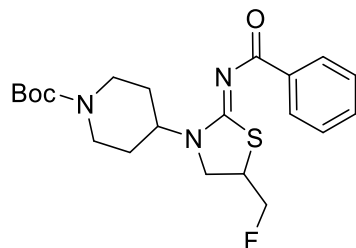

**2o**

**tert-butyl (Z)-4-(2-(benzoylimino)-5-(fluoromethyl)thiazolidin-3-yl)piperidine-1-carboxylate (2o):** The general procedure from tert-butyl 4-(1-allyl-3-benzoylthioureido)piperidine-1-carboxylate **1o** (80.7 mg, 0.2 mmol), PhI(OPiv)<sub>2</sub> (92.5 mg, 0.23 mmol), Et<sub>3</sub>N·3HF (96.7 mg, 0.6 mmol) and PhMe (3 mL) at room temperature for 2 h, the residue was purified by column chromatography on silica gel using dichloromethane : methane = 100:1 to give **2o** as yellow liquid (57.6 mg, 66% yield). <sup>1</sup>H NMR (600 MHz, CDCl<sub>3</sub>) δ 8.28 – 8.19 (m, 2H), 7.54 – 7.48 (m, 1H), 7.43 (td, J = 7.6, 1.8 Hz, 2H), 4.81 (td, J = 12.2, 4.5 Hz, 1H), 4.44 (m, 1H), 4.37 – 4.15 (m, 3H), 3.86 – 3.60 (m, 3H), 2.89 (s, 2H), 1.88 (d, J = 10.8 Hz, 2H), 1.66 (s, 2H), 1.49 (s, 9H). <sup>13</sup>C NMR (151 MHz, CDCl<sub>3</sub>) δ 175.9, 169.5, 154.6, 136.3, 132.1, 129.6, 128.1, 82.2 (d, J = 178.6 Hz), 80.0, 54.9, 46.8, 40.2 (d, J = 20.6 Hz), 29.4, 28.7, 28.4, 27.2. <sup>19</sup>F NMR (565 MHz, CDCl<sub>3</sub>) δ -212.04. HRMS (ESI-TOF) m/z: [M+Na]<sup>+</sup> calculated for C<sub>21</sub>H<sub>28</sub>FN<sub>3</sub>NaO<sub>3</sub>S 444.1728, found 444.1724.

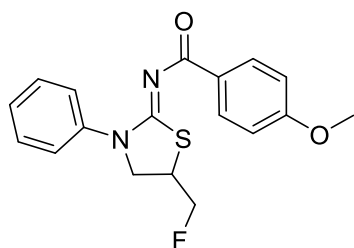

**2p**

**(Z)-N-(5-(fluoromethyl)-3-phenylthiazolidin-2-ylidene)-4-methoxybenzamide (2p):** The general procedure from *N*-(allyl(phenyl)carbamothioyl)-4-methoxybenzamide **1p** (65.3 mg, 0.2 mmol), PhI(OPiv)<sub>2</sub> (92.5 mg, 0.23 mmol), Et<sub>3</sub>N·3HF (96.7 mg, 0.6 mmol) and PhMe (3 mL) at room temperature for 2 h, the residue was purified by column chromatography on silica gel using dichloromethane to give **2p** as white solid (56.1 mg, 74%

yield).Mp: 94.6-96.1 °C. <sup>1</sup>H NMR (500 MHz, CDCl<sub>3</sub>) δ 8.13 – 8.02 (m, 2H), 7.57 – 7.44 (m, 4H), 7.33 (tt, J = 7.1, 1.5 Hz, 1H), 6.92 – 6.79 (m, 2H), 4.59 (dd, J = 9.6, 4.8 Hz, 0.5H), 4.54 – 4.45 (m, 1H), 4.42 (t, J = 9.7 Hz, 0.5H), 4.27 (dd, J = 11.1, 6.9 Hz, 1H), 4.16 (dd, J = 11.0, 2.4 Hz, 1H), 3.83 (m, 4H). <sup>13</sup>C NMR (151 MHz, CDCl<sub>3</sub>) δ 175.6, 168.4, 163.0, 140.2, 131.9, 128.9, 128.8, 126.7, 124.6, 113.3, 82.2 (d, J = 179.0 Hz), 55.3, 53.2(d, J = 3.0 Hz), 40.2 (d, J = 20.9 Hz). <sup>19</sup>F NMR (565 MHz, CDCl<sub>3</sub>) δ -211.55. HRMS (ESI-TOF) m/z: [M+Na]<sup>+</sup> calculated for C<sub>18</sub>H<sub>17</sub>FN<sub>2</sub>NaO<sub>2</sub>S 367.0887, found 367.0877.

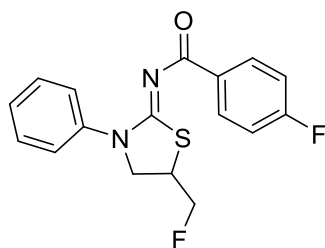

**2q**

**(Z)-4-fluoro-N-(5-(fluoromethyl)-3-phenylthiazolidin-2-ylidene)benzamide (2q):** The general procedure from *N*-(allyl(phenyl)carbamothioyl)-4-fluorobenzamide **1q** (62.9 mg, 0.2 mmol), PhI(OPiv)<sub>2</sub> (92.5 mg, 0.23 mmol), Et<sub>3</sub>N·3HF (96.7 mg, 0.6 mmol) and PhMe (3 mL) at room temperature for 2 h, the residue was purified by column chromatography on silica gel using dichloromethane to give **2q** as yellow liquid (57.5 mg, 86% yield). <sup>1</sup>H NMR (600 MHz, CDCl<sub>3</sub>) δ 8.28 – 8.19 (m, 2H), 7.54 – 7.48 (m, 1H), 7.43 (td, J = 7.6, 1.8 Hz, 2H), 4.81 (td, J = 12.2, 4.5 Hz, 1H), 4.44 (m, 1H), 4.37 – 4.15 (m, 3H), 3.86 – 3.60 (m, 3H), 2.89 (s, 2H), 1.88 (d, J = 10.8 Hz, 2H), 1.66 (s, 2H), 1.49 (s, 9H). <sup>13</sup>C NMR (151 MHz, CDCl<sub>3</sub>) δ 175.1, 169.2, 165.4 (d, J = 252.5 Hz), 140.0, 132.3 (d, J = 2.9 Hz), 132.2 (d, J = 9.2 Hz), 129.0, 127.0, 124.7, 115.0 (d, J = 21.7 Hz), 82.2 (d, J = 178.8 Hz), 53.4 (d, J = 3.0 Hz), 40.3 (d, J = 20.9 Hz). <sup>19</sup>F NMR (565 MHz, CDCl<sub>3</sub>) δ -107.28, -212.04. HRMS (ESI-TOF) m/z: [M+Na]<sup>+</sup> calculated for C<sub>17</sub>H<sub>14</sub>F<sub>2</sub>N<sub>2</sub>NaOS 355.0687, found 355.0675.

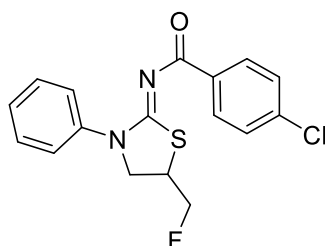

**2r**

**(Z)-4-chloro-N-(5-(fluoromethyl)-3-phenylthiazolidin-2-ylidene)benzamide (2r):** The general procedure

from *N*-(allyl(phenyl)carbamothioyl)-4-chlorobenzamide **1r** (66.2 mg, 0.2 mmol), PhI(OPiv)<sub>2</sub> (92.5 mg, 0.23 mmol), Et<sub>3</sub>N·3HF (96.7 mg, 0.6 mmol) and PhMe (3 mL) at room temperature for 2 h, the residue was purified by column chromatography on silica gel using dichloromethane to give **2r** as yellow liquid (55.6 mg, 80% yield). <sup>1</sup>H NMR (500 MHz, CDCl<sub>3</sub>) δ 8.02 (d, J = 8.1 Hz, 2H), 7.49 (d, J = 4.2 Hz, 4H), 7.33 (t, J = 6.6 Hz, 3H), 4.58 (dd, J = 9.6, 4.8 Hz, 0.5H), 4.55 – 4.45 (m, 1H), 4.42 (t, J = 9.6 Hz, 0.5H), 4.27 (dd, J = 11.3, 7.0 Hz, 1H), 4.15 (dt, J = 11.3, 1.9 Hz, 1H), 3.95 – 3.81 (m, 1H). <sup>13</sup>C NMR (151 MHz, CDCl<sub>3</sub>) δ 175.1, 169.4, 139.9, 138.4, 134.5, 131.1, 129.0, 128.3, 127.0, 124.6, 82.1 (d, J = 179.2 Hz), 53.4 (d, J = 3.1 Hz), 40.3 (d, J = 21.0 Hz). <sup>19</sup>F NMR (565 MHz, CDCl<sub>3</sub>) δ -212.25. HRMS (ESI-TOF) m/z: [M+Na]<sup>+</sup> calculated for C<sub>17</sub>H<sub>14</sub>ClFN<sub>2</sub>NaOS 371.0392, found 371.0370.

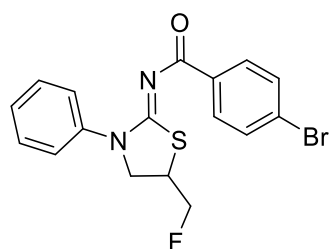

**2s**

**(Z)-4-bromo-N-(5-(fluoromethyl)-3-phenylthiazolidin-2-ylidene)benzamide (2s):** The general procedure from *N*-(allyl(phenyl)carbamothioyl)-4-bromobenzamide **1s** (75.1 mg, 0.2 mmol), PhI(OPiv)<sub>2</sub> (92.5 mg, 0.23 mmol), Et<sub>3</sub>N·3HF (96.7 mg, 0.6 mmol) and PhMe (3 mL) at room temperature for 2 h, the residue was purified by column chromatography on silica gel using dichloromethane to give **2s** as yellow liquid (59.2 mg, 75% yield). <sup>1</sup>H NMR (500 MHz, CDCl<sub>3</sub>) δ 7.95 (d, J = 8.3 Hz, 2H), 7.56 – 7.42 (m, 6H), 7.34 (dh, J = 8.7, 4.5 Hz, 1H), 4.59 (dd, J = 9.6, 4.8 Hz, 0.5H), 4.55 – 4.46 (m, 1H), 4.42 (t, J = 9.6 Hz, 0.5H), 4.27 (dd, J = 11.2, 7.0 Hz, 1H), 4.16 (dd, J = 11.2, 2.5 Hz, 1H), 3.88 (m, 1H). <sup>13</sup>C NMR (151 MHz, CDCl<sub>3</sub>) δ 175.3, 169.5, 139.9, 135.0, 131.3, 131.3, 129.0, 127.2, 127.0, 124.7, 82.1 (d, J = 179.0 Hz), 53.4 (d, J = 3.0 Hz), 40.3 (d, J = 20.8 Hz). <sup>19</sup>F NMR (565 MHz, CDCl<sub>3</sub>) δ -212.24. HRMS (ESI-TOF) m/z: [M+Na]<sup>+</sup> calculated for C<sub>17</sub>H<sub>14</sub>BrFN<sub>2</sub>NaOS 414.9886, found 414.9887.

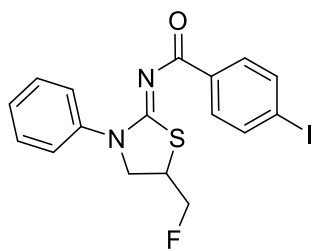

**2t**

**(Z)-N-(5-(fluoromethyl)-3-phenylthiazolidin-2-ylidene)-4-iodobenzamide (2t):** The general procedure from *N*-(allyl(phenyl)carbamothioyl)-4-iodobenzamide **1t** (84.5 mg, 0.2 mmol),  $\text{PhI}(\text{OPiv})_2$  (92.5 mg, 0.23 mmol),  $\text{Et}_3\text{N}\cdot 3\text{HF}$  (96.7 mg, 0.6 mmol) and PhMe (3 mL) at room temperature for 2 h, the residue was purified by column chromatography on silica gel using petroleum ether: dichloromethane = 1:3 to give **2t** as yellow liquid (74.3 mg, 84% yield).  $^1\text{H}$  NMR (500 MHz,  $\text{CDCl}_3$ )  $\delta$  7.87 – 7.76 (m, 2H), 7.76 – 7.65 (m, 2H), 7.56 – 7.41 (m, 4H), 7.34 (m, 1H), 4.60 (dd,  $J = 9.6, 4.7$  Hz, 0.5H), 4.56 – 4.47 (m, 1H), 4.42 (t,  $J = 9.6$  Hz, 0.5H), 4.28 (dd,  $J = 11.2, 7.0$  Hz, 1H), 4.17 (dd,  $J = 11.2, 2.5$  Hz, 1H), 3.89 (m, 1H).  $^{13}\text{C}$  NMR (151 MHz,  $\text{CDCl}_3$ )  $\delta$  175.5, 169.5, 137.4, 135.6, 131.3, 129.0, 127.1, 124.7, 100.0, 82.2 (d,  $J = 178.8$  Hz), 53.5 (d,  $J = 1.5$  Hz), 40.3 (d,  $J = 20.7$  Hz).  $^{19}\text{F}$  NMR (565 MHz,  $\text{CDCl}_3$ )  $\delta$  -212.14. HRMS (ESI-TOF)  $m/z$ :  $[\text{M}+\text{Na}]^+$  calculated for  $\text{C}_{17}\text{H}_{14}\text{IFN}_2\text{NaOS}$  462.9748, found 462.9758.

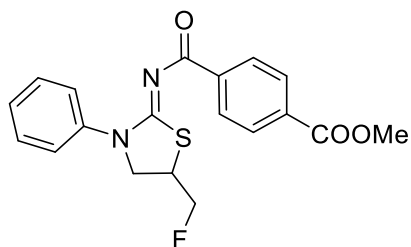

**2u**

**methyl (Z)-4-((5-(fluoromethyl)-3-phenylthiazolidin-2-ylidene)carbamoyl)benzoate (2u):** The general procedure from methyl 4-((allyl(phenyl)carbamothioyl)carbamoyl)benzoate **1u** (70.9 mg, 0.2 mmol),  $\text{PhI}(\text{OPiv})_2$  (92.5 mg, 0.23 mmol),  $\text{Et}_3\text{N}\cdot 3\text{HF}$  (96.7 mg, 0.6 mmol) and PhMe (3 mL) at room temperature for 2 h, the residue was purified by column chromatography on silica gel using dichloromethane : methane = 100:1 to give **2u** as white solid (56.0 mg, 79% yield). Mp: 86-89.2 °C.  $^1\text{H}$  NMR (500 MHz,  $\text{CDCl}_3$ )  $\delta$  8.20 – 8.11 (m, 2H), 8.08 – 7.99 (m, 2H), 7.51 (d,  $J = 5.5$  Hz, 4H), 7.36 (tt,  $J = 5.8, 2.9$  Hz, 1H), 4.61 (dd,  $J = 9.6, 4.8$  Hz, 0.5H), 4.58 – 4.48 (m, 1H), 4.44 (t,  $J = 9.7$  Hz, 0.5H), 4.31 (dd,  $J = 11.2, 7.0$  Hz, 1H), 4.19 (dd,  $J = 11.3, 2.5$  Hz, 1H), 3.91 (m,

4H).  $^{13}\text{C}$  NMR (151 MHz,  $\text{CDCl}_3$ )  $\delta$  175.4, 169.8, 166.7, 139.9, 139.9, 133.0, 129.6, 129.3, 129.1, 127.2, 124.7, 82.2 (d,  $J = 179.3$  Hz), 53.5 (d,  $J = 2.9$  Hz), 52.2, 40.3 (d,  $J = 21.1$  Hz).  $^{19}\text{F}$  NMR (565 MHz,  $\text{CDCl}_3$ )  $\delta$  -212.29. HRMS (ESI-TOF)  $m/z$ :  $[\text{M}+\text{Na}]^+$  calculated for  $\text{C}_{19}\text{H}_{17}\text{FN}_2\text{NaO}_3\text{S}$  395.0836, found 395.0830.

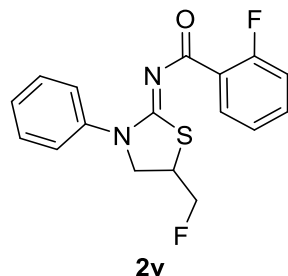

**(Z)-2-fluoro-N-(5-(fluoromethyl)-3-phenylthiazolidin-2-ylidene)benzamide (2v):** The general procedure from *N*-(allyl(phenyl)carbamothioyl)-2-fluorobenzamide **1v** (62.9 mg, 0.2 mmol),  $\text{PhI}(\text{OPiv})_2$  (92.5 mg, 0.23 mmol),  $\text{Et}_3\text{N}\cdot 3\text{HF}$  (96.7 mg, 0.6 mmol) and PhMe (3 mL) at room temperature for 2 h, the residue was purified by column chromatography on silica gel using dichloromethane to give **2v** as yellow liquid (46.7 mg, 70% yield).  $^1\text{H}$  NMR (600 MHz,  $\text{CDCl}_3$ )  $\delta$  7.96 (td,  $J = 7.7, 2.0$  Hz, 1H), 7.61 – 7.37 (m, 5H), 7.31 (t,  $J = 7.3$  Hz, 1H), 7.16 – 7.02 (m, 2H), 4.59 (dd,  $J = 9.6, 4.8$  Hz, 0.5H), 4.55 – 4.47 (m, 1H), 4.43 (t,  $J = 9.7$  Hz, 0.5H), 4.29 (dd,  $J = 11.1, 6.9$  Hz, 1H), 4.17 (dd,  $J = 11.1, 2.5$  Hz, 1H), 3.88 (m, 1H).  $^{13}\text{C}$  NMR (151 MHz,  $\text{CDCl}_3$ )  $\delta$  174.2, 169.3, 162.4 (d,  $J = 259.7$  Hz), 139.9, 133.5 (d,  $J = 9.1$  Hz), 132.5, 128.9, 126.9, 124.5, 124.5 (d,  $J = 9.1$  Hz), 123.5 (d,  $J = 3.8$  Hz), 116.8 (d,  $J = 22.6$  Hz), 82.1 (d,  $J = 179.1$  Hz), 53.5 (d,  $J = 3.0$  Hz), 40.2 (d,  $J = 20.9$  Hz).  $^{19}\text{F}$  NMR (565 MHz,  $\text{CDCl}_3$ )  $\delta$  -110.80, -212.11. HRMS (ESI-TOF)  $m/z$ :  $[\text{M}+\text{Na}]^+$  calculated for  $\text{C}_{17}\text{H}_{14}\text{F}_2\text{N}_2\text{NaOS}$  355.0687, found 355.0683.

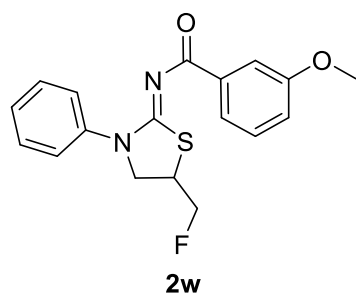

**(Z)-N-(5-(fluoromethyl)-3-phenylthiazolidin-2-ylidene)-3-methoxybenzamide (2w):** The general procedure from *N*-(allyl(phenyl)carbamothioyl)-3-methoxybenzamide **1w** (65.3 mg, 0.2 mmol),  $\text{PhI}(\text{OPiv})_2$  (92.5 mg, 0.23 mmol),  $\text{Et}_3\text{N}\cdot 3\text{HF}$  (96.7 mg, 0.6 mmol) and PhMe (3 mL) at room temperature for 2 h, the residue was purified by column chromatography on silica gel using dichloromethane : methane = 200:1 to give **2w** as yellow liquid

(56.6 mg, 87% yield).  $^1\text{H}$  NMR (500 MHz,  $\text{CDCl}_3$ )  $\delta$  7.76 – 7.64 (m, 2H), 7.59 – 7.43 (m, 4H), 7.36 – 7.22 (m, 2H), 7.06 – 6.99 (m, 1H), 4.59 (dd,  $J = 9.6, 4.8$  Hz, 0.5H), 4.56 – 4.47 (m, 1H), 4.42 (t,  $J = 9.7$  Hz, 0.5H), 4.28 (dd,  $J = 11.2, 7.0$  Hz, 1H), 4.17 (dd,  $J = 11.1, 2.4$  Hz, 1H), 3.88 (m, 1H), 3.79 (s, 3H).  $^{13}\text{C}$  NMR (151 MHz,  $\text{CDCl}_3$ )  $\delta$  175.9, 169.1, 159.4, 140.1, 137.4, 129.1, 128.9, 126.9, 124.6, 122.4, 119.3, 113.6, 82.2 (d,  $J = 178.9$  Hz), 55.2, 53.3 (d,  $J = 3.0$  Hz), 40.2 (d,  $J = 20.7$  Hz).  $^{19}\text{F}$  NMR (565 MHz,  $\text{CDCl}_3$ )  $\delta$  -211.85. HRMS (ESI-TOF)  $m/z$ :  $[\text{M}+\text{Na}]^+$  calculated for  $\text{C}_{18}\text{H}_{17}\text{FN}_2\text{NaO}_2\text{S}$  327.0574, found 367.0896.

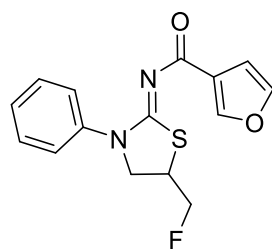

**2x**

**(Z)-N-(5-(fluoromethyl)-3-phenylthiazolidin-2-ylidene)furan-3-carboxamide (2x):** The general procedure from *N*-(allyl(phenyl)carbamothioyl)furan-3-carboxamide **1x** (57.3 mg, 0.2 mmol),  $\text{PhI}(\text{OPiv})_2$  (92.5 mg, 0.23 mmol),  $\text{Et}_3\text{N}\cdot 3\text{HF}$  (96.7 mg, 0.6 mmol) and PhMe (3 mL) at room temperature for 2 h, the residue was purified by column chromatography on silica gel using dichloromethane to give **2x** as yellow liquid (44.3 mg, 73% yield). Mp:90-93.2 °C.  $^1\text{H}$  NMR (600 MHz,  $\text{CDCl}_3$ )  $\delta$  7.62 – 7.42 (m, 5H), 7.31 (td,  $J = 7.3, 1.3$  Hz, 1H), 7.04 (d,  $J = 3.4$  Hz, 1H), 6.43 (dd,  $J = 3.4, 1.7$  Hz, 1H), 4.58 (dd,  $J = 9.6, 4.7$  Hz, 0.5H), 4.54 – 4.47 (m, 1H), 4.42 (t,  $J = 9.7$  Hz, 0.5H), 4.28 (dd,  $J = 11.1, 6.9$  Hz, 1H), 4.16 (dd,  $J = 11.1, 2.4$  Hz, 1H), 3.87 (m, 1H).  $^{13}\text{C}$  NMR (151 MHz,  $\text{CDCl}_3$ )  $\delta$  168.6, 167.2, 151.1, 146.2, 139.9, 128.9, 126.8, 124.5, 117.6, 111.7, 82.1 (d,  $J = 179.2$  Hz), 53.4 (d,  $J = 2.9$  Hz), 40.3 (d,  $J = 21.1$  Hz).  $^{19}\text{F}$  NMR (565 MHz,  $\text{CDCl}_3$ )  $\delta$  -211.95. HRMS (ESI-TOF)  $m/z$ :  $[\text{M}+\text{Na}]^+$  calculated for  $\text{C}_{15}\text{H}_{13}\text{FN}_2\text{NaO}_2\text{S}$  327.0574, found 327.0563.

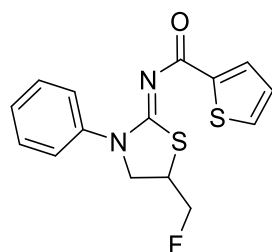

**2y**

**(Z)-N-(5-(fluoromethyl)-3-phenylthiazolidin-2-ylidene)thiophene-2-carboxamide (2y):** The general

procedure from *N*-(allyl(phenyl)carbamothioyl)thiophene-2-carboxamide **1y** (60.5 mg, 0.2 mmol),  $\text{PhI}(\text{OPiv})_2$  (92.5 mg, 0.23 mmol),  $\text{Et}_3\text{N}\cdot 3\text{HF}$  (96.7 mg, 0.6 mmol) and PhMe (3 mL) at room temperature for 2 h, the residue was purified by column chromatography on silica gel using dichloromethane to give **2y** as yellow liquid (48.8 mg, 76% yield).  $^1\text{H}$  NMR (500 MHz,  $\text{CDCl}_3$ )  $\delta$  7.77 (dd,  $J = 3.7, 1.3$  Hz, 1H), 7.59 – 7.40 (m, 5H), 7.36 – 7.27 (m, 1H), 7.04 (dd,  $J = 5.0, 3.7$  Hz, 1H), 4.58 (dd,  $J = 9.6, 4.8$  Hz, 0.5H), 4.54 – 4.45 (m, 1H), 4.41 (t,  $J = 9.7$  Hz, 0.5H), 4.28 (dd,  $J = 11.1, 7.0$  Hz, 1H), 4.16 (dd,  $J = 11.1, 2.4$  Hz, 1H), 3.87 (m, 1H).  $^{13}\text{C}$  NMR (126 MHz,  $\text{CDCl}_3$ )  $\delta$  170.9, 168.3, 142.3, 139.8, 132.3, 132.2, 128.9, 127.9, 126.8, 124.5, 82.1 (d,  $J = 179.0$  Hz), 53.3 (d,  $J = 3.0$  Hz), 40.3 (d,  $J = 21.0$  Hz).  $^{19}\text{F}$  NMR (565 MHz,  $\text{CDCl}_3$ )  $\delta$  -211.85. HRMS (ESI-TOF)  $m/z$ :  $[\text{M}+\text{Na}]^+$  calculated for  $\text{C}_{15}\text{H}_{13}\text{FN}_2\text{NaOS}_2$  343.0346, found 343.0334.

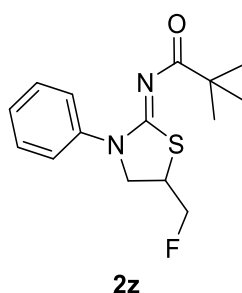

**(Z)-N-(5-(fluoromethyl)-3-phenylthiazolidin-2-ylidene)pivalamide (2z):** The general procedure from *N*-(allyl(phenyl)carbamothioyl)pivalamide **1z** (55.3 mg, 0.2 mmol),  $\text{PhI}(\text{OPiv})_2$  (92.5 mg, 0.23 mmol),  $\text{Et}_3\text{N}\cdot 3\text{HF}$  (96.7 mg, 0.6 mmol) and PhMe (3 mL) at room temperature for 2 h, the residue was purified by column chromatography on silica gel using petroleum ether: dichloromethane = 1:3 to give **2z** as white solid (39.1 mg, 66% yield). Mp: 106.5-108.0 °C.  $^1\text{H}$  NMR (600 MHz,  $\text{CDCl}_3$ )  $\delta$  7.63 – 7.37 (m, 4H), 7.36 – 7.23 (m, 1H), 4.56 (dd,  $J = 9.6, 4.8$  Hz, 0.5H), 4.54 – 4.45 (m, 1H), 4.39 (d,  $J = 9.7$  Hz, 0.5H), 4.22 (dd,  $J = 11.0, 6.9$  Hz, 1H), 4.12 (dd,  $J = 11.0, 2.5$  Hz, 1H), 3.83 (m, 1H), 1.16 (s, 9H).  $^{13}\text{C}$  NMR (151 MHz,  $\text{CDCl}_3$ )  $\delta$  190.9, 167.9, 140.2, 128.6, 126.2, 124.1, 82.2 (d,  $J = 179.0$  Hz), 52.9 (d,  $J = 2.9$  Hz), 41.2, 39.9 (d,  $J = 21.0$  Hz), 27.2.  $^{19}\text{F}$  NMR (565 MHz,  $\text{CDCl}_3$ )  $\delta$  -211.50. HRMS (ESI-TOF)  $m/z$ :  $[\text{M}+\text{Na}]^+$  calculated for  $\text{C}_{15}\text{H}_{19}\text{FN}_2\text{NaOS}$  317.1094, found 317.1085.

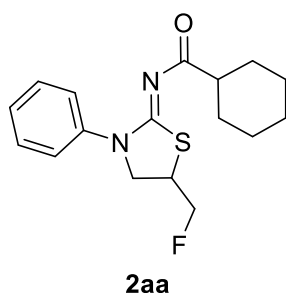



**(Z)-N-(5-(fluoromethyl)-3-phenylthiazolidin-2-ylidene)cyclohexanecarboxamide (2aa):** The general procedure from *N*-(allyl(phenyl)carbamothioyl)cyclohexanecarboxamide **1aa** (66.5 mg, 0.2 mmol), PhI(OPiv)<sub>2</sub> (92.5 mg, 0.23 mmol), Et<sub>3</sub>N·3HF (96.7 mg, 0.6 mmol) and PhMe (3 mL) at room temperature for 2 h, the residue was purified by column chromatography on silica gel using dichloromethane to give **2aa** as white solid (31.5 mg, 49% yield). Mp: 92.4-95.1 °C. <sup>1</sup>H NMR (600 MHz, CDCl<sub>3</sub>) δ 7.50 – 7.39 (m, 4H), 7.30 – 7.27 (m, 1H), 4.55 (dd, J = 9.5, 4.7 Hz, 0.5H), 4.49 – 4.43 (m, 1H), 4.38 (t, J = 9.8 Hz, 0.5H), 4.19 (dd, J = 11.1, 6.9 Hz, 1H), 4.10 (dd, J = 11.1, 2.4 Hz, 1H), 3.80 (m, 1H), 2.33 (tt, J = 11.3, 3.6 Hz, 1H), 1.95 – 1.85 (m, 2H), 1.71 (dq, J = 11.9, 3.5 Hz, 2H), 1.66 – 1.52 (m, 2H), 1.38 (m, 2H), 1.24 – 1.12 (m, 2H). <sup>13</sup>C NMR (151 MHz, CDCl<sub>3</sub>) δ 188.3, 167.8, 140.1, 128.9, 126.5, 124.3, 82.2 (d, J = 178.7 Hz), 53.2 (d, J = 2.8 Hz), 47.8, 40.0 (d, J = 20.9 Hz), 29.1, 29.1, 26.0, 25.8, 25.7. <sup>19</sup>F NMR (565 MHz, CDCl<sub>3</sub>) δ -211.53. HRMS (ESI-TOF) m/z: [M+Na]<sup>+</sup> calculated for C<sub>17</sub>H<sub>21</sub>FN<sub>2</sub>NaOS 343.1251, found 334.1232.

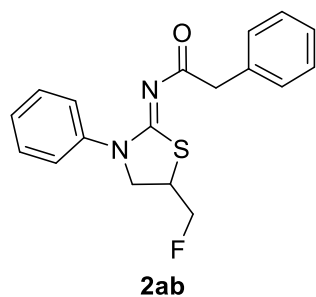

**(Z)-N-(5-(fluoromethyl)-3-phenylthiazolidin-2-ylidene)-2-phenylacetamide (2ab):** The general procedure from *N*-(allyl(phenyl)carbamothioyl)-2-phenylacetamide **1ab** (62.1 mg, 0.2 mmol), PhI(OPiv)<sub>2</sub> (92.5 mg, 0.23 mmol), Et<sub>3</sub>N·3HF (96.7 mg, 0.6 mmol) and PhMe (3 mL) at room temperature for 2 h, the residue was purified by column chromatography on silica gel using dichloromethane to give **2ab** as yellow liquid (39.4 mg, 60% yield). <sup>1</sup>H NMR (500 MHz, CDCl<sub>3</sub>) δ 7.45 – 7.35 (m, 2H), 7.35 – 7.18 (m, 8H), 4.52 (dd, J = 9.6, 4.7 Hz, 0.5H), 4.48 – 4.39 (m, 1H), 4.34 (t, J = 9.7 Hz, 0.5H), 4.17 (dd, J = 11.2, 7.0 Hz, 1H), 4.07 (dd, J = 11.2, 2.5 Hz, 1H), 3.78 (m, 1H), 3.71 (s, 2H). <sup>13</sup>C NMR (151 MHz, CDCl<sub>3</sub>) δ 183.1, 168.4, 139.7, 135.9, 129.8, 128.9, 128.2, 126.7, 126.4, 124.4, 82.1 (d, J = 178.8 Hz), 53.3 (d, J = 3.0 Hz), 47.2, 40.0 (d, J = 20.2 Hz). <sup>19</sup>F NMR (565 MHz, CDCl<sub>3</sub>) δ -211.91. HRMS (ESI-TOF) m/z: [M+Na]<sup>+</sup> calculated for C<sub>18</sub>H<sub>17</sub>FN<sub>2</sub>NaOS 351.0938, found 351.0930.

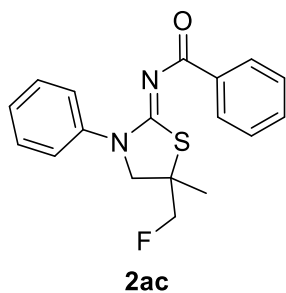

**(Z)-N-(5-(fluoromethyl)-5-methyl-3-phenylthiazolidin-2-ylidene)benzamide (2ac):** The general procedure from *N*-((2-methylallyl)(phenyl)carbamothioyl)benzamide **1ac** (77.0 mg, 0.2 mmol),  $\text{PhI}(\text{OPiv})_2$  (92.5 mg, 0.23 mmol),  $\text{Et}_3\text{N}\cdot 3\text{HF}$  (96.7 mg, 0.6 mmol) and PhMe (3 mL) at room temperature for 2 h, the residue was purified by column chromatography on silica gel using dichloromethane to give **2ac** as white solid (49.6 mg, 76% yield). Mp: 138.3-140.1 °C.  $^1\text{H}$  NMR (600 MHz,  $\text{CDCl}_3$ )  $\delta$  8.15 – 8.08 (m, 2H), 7.56 – 7.42 (m, 5H), 7.41 – 7.28 (m, 3H), 4.54 (dd,  $J = 48.2, 9.4$  Hz, 1H), 4.35 (dd,  $J = 47.4, 9.4$  Hz, 1H), 4.15 (d,  $J = 10.9$  Hz, 1H), 3.91 (d,  $J = 10.9$  Hz, 1H), 1.67 (s, 3H).  $^{13}\text{C}$  NMR (151 MHz,  $\text{CDCl}_3$ )  $\delta$  176.2, 169.4, 140.2, 136.0, 132.2, 129.8, 128.9, 128.0, 126.8, 124.6, 85.4 (d,  $J = 183.6$  Hz), 59.1 (d,  $J = 2.4$  Hz), 48.8 (d,  $J = 19.0$  Hz), 20.9 (d,  $J = 2.3$  Hz).  $^{19}\text{F}$  NMR (565 MHz,  $\text{CDCl}_3$ )  $\delta$  -212.42. HRMS (ESI-TOF)  $m/z$ :  $[\text{M}+\text{Na}]^+$  calculated for  $\text{C}_{18}\text{H}_{17}\text{FN}_2\text{NaOS}$  351.0938, found 351.0931.

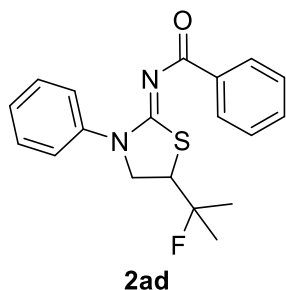

**(Z)-N-(5-(2-fluoropropan-2-yl)-3-phenylthiazolidin-2-ylidene)benzamide (2ad):** The general procedure from *N*-((3-methylbut-2-en-1-yl)(phenyl)carbamothioyl)benzamide **1ad** (64.9 mg, 0.2 mmol),  $\text{PhI}(\text{OPiv})_2$  (92.5 mg, 0.23 mmol),  $\text{Et}_3\text{N}\cdot 3\text{HF}$  (96.7 mg, 0.6 mmol) and PhMe (3 mL) at room temperature for 2 h, the residue was purified by column chromatography on silica gel using dichloromethane to give **2ad** as yellow liquid (63.9 mg, 93% yield).  $^1\text{H}$  NMR (500 MHz,  $\text{CDCl}_3$ )  $\delta$  8.20 – 8.07 (m, 2H), 7.59 – 7.45 (m, 5H), 7.37 (m, 3H), 4.31 – 4.18 (m, 2H), 3.81 (m, 1H), 1.54 (d,  $J = 9.4$  Hz, 3H), 1.50 (d,  $J = 9.1$  Hz, 3H).  $^{13}\text{C}$  NMR (151 MHz,  $\text{CDCl}_3$ )  $\delta$  176.1, 169.7, 140.0, 136.1, 132.1, 129.8, 129.0, 128.0, 126.8, 124.6, 96.2 (d,  $J = 172.5$  Hz), 52.6 (d,  $J = 4.2$  Hz), 49.3 (d,  $J = 25.6$  Hz), 25.6 (d,  $J = 23.6$  Hz), 21.8 (d,  $J = 24.5$  Hz).  $^{19}\text{F}$  NMR (565 MHz,  $\text{CDCl}_3$ )  $\delta$  -139.70. HRMS (ESI-TOF)  $m/z$ :

[M+Na]<sup>+</sup> calculated for C<sub>19</sub>H<sub>19</sub>FN<sub>2</sub>NaOS 365.1094, found 365.1091.

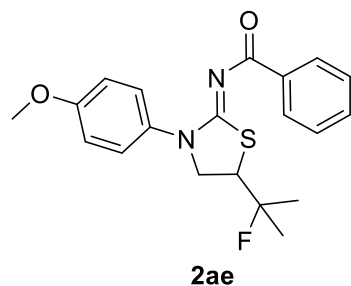

**(Z)-N-(5-(2-fluoropropan-2-yl)-3-(4-methoxyphenyl)thiazolidin-2-ylidene)benzamide (2ae):** The general procedure from *N*-((4-methoxyphenyl)(3-methylbut-2-en-1-yl)carbamothioyl)benzamide **1ae** (70.9 mg, 0.2 mmol), PhI(OPiv)<sub>2</sub> (92.5 mg, 0.23 mmol), Et<sub>3</sub>N·3HF (96.7 mg, 0.6 mmol) and PhMe (3 mL) at room temperature for 2 h, the residue was purified by column chromatography on silica gel using dichloromethane to give **2ae** as yellow liquid (61.84 mg, 83% yield). <sup>1</sup>H NMR (600 MHz, Chloroform-*d*) δ 8.11 (dd, *J* = 8.3, 1.5 Hz, 2H), 7.47 – 7.42 (m, 1H), 7.42 – 7.38 (m, 2H), 7.35 (t, *J* = 7.6 Hz, 2H), 7.03 – 6.93 (m, 2H), 4.21 – 4.08 (m, 2H), 3.85 (s, 3H), 3.75 (ddd, *J* = 10.8, 8.3, 4.0 Hz, 1H), 1.48 (dd, *J* = 21.5, 5.9 Hz, 5H). <sup>13</sup>C NMR (126 MHz, Chloroform-*d*) δ 175.95, 169.65, 158.05, 136.19, 132.81, 131.97, 129.66, 127.93, 125.92, 114.09, 96.14 (d, *J* = 172.4 Hz), 55.44, 52.80, 49.35, 49.15, 25.47 (d, *J* = 23.8 Hz), 21.81 (d, *J* = 24.3 Hz). <sup>19</sup>F NMR (471 MHz, Chloroform-*d*) δ -139.88 (d, *J* = 8.7 Hz).

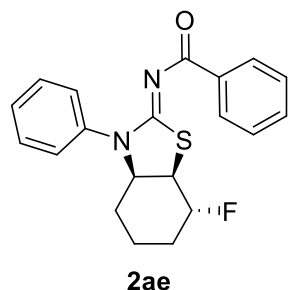

**(Z)-N-(7-fluoro-3-phenylhexahydrobenzo[d]thiazol-2(3H)-ylidene)benzamide (2ae):** The general procedure from *N*-(cyclohex-2-en-1-yl)(phenyl)carbamothioyl)benzamide **1ae** (67.3 mg, 0.2 mmol), PhI(OPiv)<sub>2</sub> (92.5 mg, 0.23 mmol), Et<sub>3</sub>N·3HF (96.7 mg, 0.6 mmol) and PhMe (3 mL) at room temperature for 2 h, the residue was purified by column chromatography on silica gel using dichloromethane to give **2ae** as white solid (56.4 mg, 80% yield). Mp: 144.1-146.3 °C. <sup>1</sup>H NMR (500 MHz, CDCl<sub>3</sub>) δ 8.09 – 7.97 (m, 2H), 7.55 – 7.27 (m, 8H), 4.88 (m, 1H), 4.42 (q, *J* = 6.1 Hz, 1H), 3.85 (dt, *J* = 14.4, 5.8 Hz, 1H), 2.06 (m, 1H), 1.93 – 1.65 (m, 3H), 1.65 – 1.45 (m, 2H). <sup>13</sup>C NMR (151 MHz, CDCl<sub>3</sub>) δ 176.2, 170.7, 139.1, 136.2, 132.0, 129.7, 129.1, 127.9, 127.6, 126.9, 91.0 (d, *J* = 174.2 Hz), 62.0 (d, *J* = 3.5 Hz), 47.0 (d, *J* = 25.0 Hz), 28.1 (d, *J* = 19.8 Hz), 25.2, 16.8 (d, *J* = 6.3 Hz). <sup>19</sup>F NMR

(565 MHz, CDCl<sub>3</sub>)  $\delta$  -175.19. HRMS (ESI-TOF)  $m/z$ : [M+Na]<sup>+</sup> calculated for C<sub>20</sub>H<sub>19</sub>FN<sub>2</sub>NaOS 377.1094, found 377.1085.

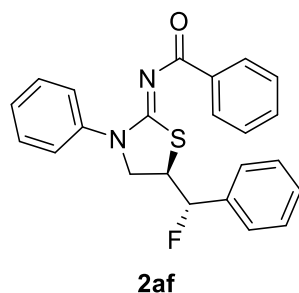

**(Z)-N-(5-(fluoro(phenyl)methyl)-3-phenylthiazolidin-2-ylidene)benzamide (2af):** The general procedure from *N*-(cinnamyl(phenyl)carbamothioyl)benzamide **1af** (74.5 mg, 0.2 mmol), PhI(OPiv)<sub>2</sub> (92.5 mg, 0.23 mmol), Et<sub>3</sub>N·3HF (96.7 mg, 0.6 mmol) and PhMe (3 mL) at room temperature for 2 h, the residue was purified by column chromatography on silica gel using dichloromethane to give **2af** as white solid (54.6 mg, 70% yield). Mp: 161-163.2 °C. <sup>1</sup>H NMR (600 MHz, CDCl<sub>3</sub>)  $\delta$  8.10 (d, *J* = 7.8 Hz, 2H), 7.70 – 7.27 (m, 13H), 5.49 (dd, *J* = 47.5, 9.0 Hz, 1H), 4.32 (qd, *J* = 11.2, 5.8 Hz, 2H), 4.15 – 3.96 (m, 1H). <sup>13</sup>C NMR (151 MHz, CDCl<sub>3</sub>)  $\delta$  176.0, 169.4, 140.0, 136.1, 136.0, 132.2, 129.8, 129.6, 128.9, 128.8, 128.0, 126.8, 126.8, 124.7, 94.0 (d, *J* = 179.5 Hz), 53.6 (d, *J* = 4.0 Hz), 46.4 (d, *J* = 26.7 Hz). <sup>19</sup>F NMR (565 MHz, CDCl<sub>3</sub>)  $\delta$  -167.30, -167.33. HRMS (ESI-TOF)  $m/z$ : [M+Na]<sup>+</sup> calculated for C<sub>23</sub>H<sub>19</sub>FN<sub>2</sub>NaOS 413.1094, found 413.1105.

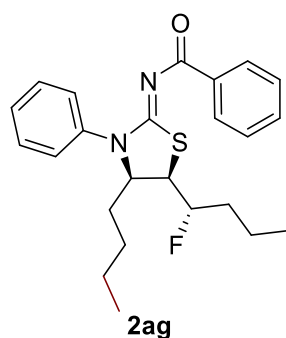

**(Z)-N-(4-butyl-5-(1-fluorobutyl)-3-phenylthiazolidin-2-ylidene)benzamide (2ag):** The general procedure from *N*-(cyclohex-2-en-1-yl(phenyl)carbamothioyl)benzamide **1ag** (67.3 mg, 0.2 mmol), PhI(OPiv)<sub>2</sub> (92.5 mg, 0.23 mmol), Et<sub>3</sub>N·3HF (96.7 mg, 0.6 mmol) and PhMe (3 mL) at room temperature for 2 h, the residue was purified by column chromatography on silica gel using dichloromethane to give **2ag** as yellow liquid (62.6 mg, 76% yield), syn : anti = 2.2:1. <sup>1</sup>H NMR (600 MHz, CDCl<sub>3</sub>)  $\delta$  8.07 – 7.92 (m, 6H), 7.49 – 7.20 (m, 26H), 4.90 – 4.73 (m, 1H), 4.58 – 4.34 (m, 6H), 4.02 (dt, *J* = 10.2, 7.0 Hz, 1H), 3.28 (t, *J* = 8.9 Hz, 2H), 1.91 – 1.32 (m, 21H),

1.31 – 1.04 (m, 14H), 0.89 (m, 10H), 0.73 (m, 10H).<sup>13</sup>C NMR (151 MHz, CDCl<sub>3</sub>) δ 176.3, 176.2, 169.0, 168.0, 139.7, 138.9, 136.1, 132.0, 131.9, 129.7, 129.7, 129.0, 128.8, 127.9, 127.4, 127.3, 127.0, 126.9, 93.7 (d, J = 177.8 Hz), 91.1 (d, J = 173.8 Hz), 64.9, 64.8 (d, J = 4.7 Hz), 49.9 (d, J = 24.0 Hz), 49.3 (d, J = 21.7 Hz), 36.5, 36.4, 34.7 (d, J = 20.6 Hz), 30.5, 27.7 (d, J = 12.3 Hz), 27.2, 22.7, 22.3, 18.3 (d, J = 2.5 Hz), 17.8 (d, J = 2.9 Hz), 13.8, 13.7, 13.7. <sup>19</sup>F NMR (471 MHz, CDCl<sub>3</sub>) δ -177.38, -178.64. HRMS (ESI-TOF) m/z: [M+Na]<sup>+</sup> calculated for C<sub>24</sub>H<sub>29</sub>FN<sub>2</sub>NaOS 435.1877, found 435.1881.

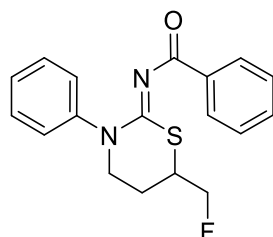

**2ah**

**(Z)-N-(6-(fluoromethyl)-3-phenyl-1,3-thiazinan-2-ylidene)benzamide (2ah):** The general procedure from *N*-(but-3-en-1-yl(phenyl)carbamothioyl)benzamide **1ah** (62.1 mg, 0.2 mmol), PhI(OPiv)<sub>2</sub> (92.5 mg, 0.23 mmol), Et<sub>3</sub>N·3HF (96.7 mg, 0.6 mmol) and PhMe (3 mL) at room temperature for 2 h, the residue was purified by column chromatography on silica gel using petroleum ether: dichloromethane = 1:3 to give **2ah** as white solid (29.6 mg, 45% yield). Mp: 109.1-115.7 °C. <sup>1</sup>H NMR (500 MHz, CDCl<sub>3</sub>) δ 7.80 (d, J = 7.7 Hz, 2H), 7.46 (t, J = 7.6 Hz, 2H), 7.39 – 7.20 (m, 6H), 4.72 – 4.44 (m, 2H), 4.01 – 3.82 (m, 2H), 3.70 (m, 1H), 2.52 (dt, J = 15.4, 5.4 Hz, 1H), 2.30 (m, 1H).<sup>13</sup>C NMR (126 MHz, CDCl<sub>3</sub>) δ 174.4, 164.1, 145.9, 136.8, 131.5, 129.5, 129.3, 127.8, 127.4, 126.3, 83.8 (d, J = 178.0 Hz), 49.8, 40.3 (d, J = 20.8 Hz), 26.2 (d, J = 3.2 Hz). <sup>19</sup>F NMR (565 MHz, CDCl<sub>3</sub>) δ -216.29. HRMS (ESI-TOF) m/z: [M+Na]<sup>+</sup> calculated for C<sub>18</sub>H<sub>17</sub>FN<sub>2</sub>NaOS 351.0938, found 351.0931.

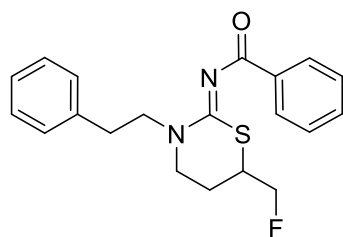

**2ai**

**(Z)-N-(6-(fluoromethyl)-3-phenethyl-1,3-thiazinan-2-ylidene)benzamide (2ai):** The general procedure from *N*-(but-3-en-1-yl(phenethyl)carbamothioyl)benzamide **1ai** (67.7 mg, 0.2 mmol), PhI(OPiv)<sub>2</sub> (92.5 mg, 0.23 mmol), Et<sub>3</sub>N·3HF (96.7 mg, 0.6 mmol) and PhMe (3 mL) at room temperature for 2 h, the residue was purified by column chromatography on silica gel using dichloromethane to give **2ai** as white solid (48.6 mg, 68% yield).

Mp:84.1-85.7 °C. <sup>1</sup>H NMR (600 MHz, CDCl<sub>3</sub>) δ 8.27 – 8.19 (m, 2H), 7.54 – 7.46 (m, 1H), 7.42 (dd, J = 8.3, 6.8 Hz, 2H), 7.33 (t, J = 7.5 Hz, 2H), 7.29 – 7.19 (m, 3H), 4.50 (dd, J = 9.6, 5.1 Hz, 0.5H), 4.45 – 4.36 (m, 1H), 4.32 (t, J = 9.1 Hz, 0.5H), 4.03 (m, 2H), 3.54 – 3.43 (m, 1H), 3.33 (m, 2H), 3.10 (t, J = 7.3 Hz, 2H), 2.22 (m, 1H), 1.96 (m, 1H). <sup>13</sup>C NMR (151 MHz, CDCl<sub>3</sub>) δ 174.4, 163.5, 138.6, 137.4, 131.5, 129.5, 128.9, 128.7, 127.9, 126.7, 83.5 (d, J = 178.3 Hz), 56.3, 47.7, 39.6 (d, J = 20.6 Hz), 33.6, 25.3 (d, J = 3.0 Hz). <sup>19</sup>F NMR (565 MHz, CDCl<sub>3</sub>) δ -215.93. HRMS (ESI-TOF) m/z: [M+Na]<sup>+</sup> calculated for C<sub>20</sub>H<sub>21</sub>FN<sub>2</sub>NaOS 379.1251, found 379.1255.

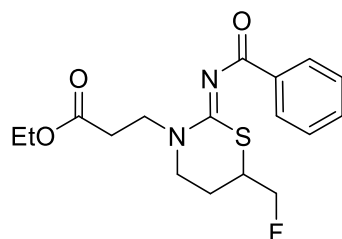

**2aj**

**ethyl (Z)-3-(2-(benzoylimino)-6-(fluoromethyl)-1,3-thiazinan-3-yl)propanoate (2aj):** The general procedure from ethyl 3-(3-benzoyl-1-(but-3-en-1-yl)thioureido)propanoate **1aj** (66.9 mg, 0.2 mmol), PhI(OPiv)<sub>2</sub> (92.5 mg, 0.23 mmol), Et<sub>3</sub>N·3HF (96.7 mg, 0.6 mmol) and PhMe (3 mL) at room temperature for 2 h, the residue was purified by column chromatography on silica gel using dichloromethane to give **2aj** as yellow liquid (48.7 mg, 69% yield). <sup>1</sup>H NMR (600 MHz, CDCl<sub>3</sub>) δ 8.12 – 8.05 (m, 2H), 7.45 – 7.27 (m, 3H), 4.45 (dd, J = 9.6, 5.2 Hz, 0.5H), 4.43 – 4.34 (m, 1H), 4.32 (dd, J = 9.6, 8.1 Hz, 0.5H), 4.07 (q, J = 7.1 Hz, 2H), 4.04 – 3.93 (m, 2H), 3.65 (m, 1H), 3.57 (m, 1H), 3.51 – 3.41 (m, 1H), 2.78 (td, J = 6.5, 2.8 Hz, 2H), 2.30 (m, 1H), 2.04 (m, 1H), 1.19 (t, J = 7.1 Hz, 3H). <sup>13</sup>C NMR (151 MHz, CDCl<sub>3</sub>) δ 174.2, 171.9, 163.8, 137.1, 131.5, 129.4, 127.9, 83.6 (d, J = 177.9 Hz), 60.8, 50.3, 48.0, 39.8 (d, J = 20.9 Hz), 32.5, 25.6 (d, J = 3.6 Hz), 14.1. <sup>19</sup>F NMR (565 MHz, CDCl<sub>3</sub>) δ -216.31. HRMS (ESI-TOF) m/z: [M+Na]<sup>+</sup> calculated for C<sub>17</sub>H<sub>21</sub>FN<sub>2</sub>NaO<sub>3</sub>S 375.1149, found 375.1160.

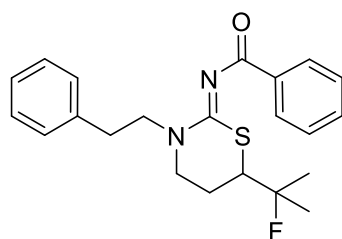

**2ak**

**(Z)-N-(6-(2-fluoropropan-2-yl)-3-phenethyl-1,3-thiazinan-2-ylidene)benzamide (2ak):** The general procedure from *N*-((4-methylpent-3-en-1-yl)(phenethyl)carbamothioyl)benzamide **1ak** (73.3 mg, 0.2 mmol), PhI(OPiv)<sub>2</sub> (92.5 mg, 0.23 mmol), Et<sub>3</sub>N·3HF (96.7 mg, 0.6 mmol) and PhMe (3 mL) at room temperature for 2

h, the residue was purified by column chromatography on silica gel using dichloromethane to give **2ak** as white solid (69.7 mg, 91% yield). Mp:88.4-89.6 °C.  $^1\text{H}$  NMR (600 MHz,  $\text{CDCl}_3$ )  $\delta$  8.27 – 8.20 (m, 2H), 7.51 – 7.45 (m, 1H), 7.42 (dd,  $J = 8.2, 6.7$  Hz, 2H), 7.32 (td,  $J = 7.2, 1.6$  Hz, 2H), 7.29 – 7.21 (m, 3H), 4.09 (m, 1H), 3.95 (m, 1H), 3.43 – 3.30 (m, 3H), 3.09 (m, 2H), 2.24 (dq,  $J = 13.7, 3.8$  Hz, 1H), 1.85 (m, 1H), 1.44 (dd,  $J = 21.9, 13.6$  Hz, 6H).  $^{13}\text{C}$  NMR (151 MHz,  $\text{CDCl}_3$ )  $\delta$  174.1, 164.4, 138.6, 137.5, 131.4, 129.5, 128.9, 128.7, 127.9, 126.7, 96.0 (d,  $J = 172.4$  Hz), 56.0, 49.7 (d,  $J = 25.7$  Hz), 49.7, 33.5, 25.4 (d,  $J = 24.1$  Hz), 25.0 (d,  $J = 4.3$  Hz), 22.6 (d,  $J = 24.2$  Hz).  $^{19}\text{F}$  NMR (565 MHz,  $\text{CDCl}_3$ )  $\delta$  -137.77. HRMS (ESI-TOF)  $m/z$ :  $[\text{M}+\text{Na}]^+$  calculated for  $\text{C}_{22}\text{H}_{25}\text{FN}_2\text{NaOS}$  407.1564, found 407.1574.

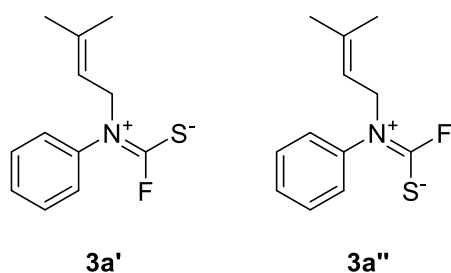

**(3-methylbut-2-en-1-yl)(phenyl)carbamothioic fluoride (3a' and 3a'')**: The general procedure from *N*-(3-methylbut-2-en-1-yl)aniline (331.3 mg, 1.75 mmol), sulfur (224 mg, 7 mmol), KF (305 mg, 5.25 mmol),  $\text{TMSCF}_3$  (1251.3 mg, 8.75 mmol) and THF (17 mL) at room temperature for 4 h, the residue was purified by column chromatography on silica gel using petroleum ether: ethyl acetate = 100:1 to give **3a':3a''** = 3.8:1 as yellow liquid (335.3 mg, 86% yield).  $^1\text{H}$  NMR (500 MHz,  $\text{CDCl}_3$ )  $\delta$  7.51 – 7.25 (m, 17H), 7.15 (m, 8H), 5.36 (tt,  $J = 7.2, 1.5$  Hz, 4H), 5.29 (t,  $J = 7.5$  Hz, 1H), 4.65 (d,  $J = 7.2$  Hz, 8H), 4.37 (d,  $J = 7.4$  Hz, 2H), 1.72 (d,  $J = 7.5$  Hz, 15H), 1.47 (d,  $J = 14.2$  Hz, 15H).  $^{13}\text{C}$  NMR (126 MHz,  $\text{CDCl}_3$ )  $\delta$  181.8, 179.2, 142.9, 139.7, 139.0, 139.0, 129.7, 129.4, 128.6, 128.5, 126.7, 125.8, 116.7, 115.9, 55.1, 55.0, 51.9, 51.9, 25.7, 25.6, 18.0, 17.6.  $^{19}\text{F}$  NMR (565 MHz,  $\text{CDCl}_3$ )  $\delta$  23.15, 17.25. HRMS (EI-TOF)  $m/z$ :  $\text{M}^+$  calculated for  $\text{C}_{12}\text{H}_{14}\text{FNS}$  223.0831, found 223.0835.

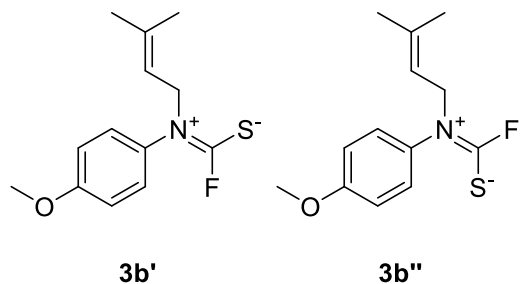

**allyl(4-methoxyphenyl)carbamothioic fluoride (3b' and 3b'')**: The general procedure from 4-methoxy-*N*-(3-methylbut-2-en-1-yl)aniline (688.6 mg, 3.6 mmol), sulfur (460.8 mg, 14.4 mmol), KF (627.5 mg, 10.8 mmol),

TMSCF<sub>3</sub> (2574 mg, 18 mmol) and THF (36 mL) at room temperature for 4 h, the residue was purified by column chromatography on silica gel using petroleum ether: ethyl acetate = 30:1 to give **3b':3b''** = 3.5:1 as yellow liquid (746.1 mg, 92% yield). <sup>1</sup>H NMR (500 MHz, CDCl<sub>3</sub>) δ 7.21 – 7.15 (m, 2H), 7.10 – 7.02 (m, 7H), 6.97 – 6.93 (m, 2H), 6.93 – 6.87 (m, 7H), 5.35 (m, 4H), 5.28 (t, J = 7.5 Hz, 1H), 4.62 (d, J = 7.2 Hz, 7H), 4.34 (d, J = 7.4 Hz, 2H), 3.82 (d, J = 4.2 Hz, 14H), 1.72 (dd, J = 6.3, 1.4 Hz, 14H), 1.48 (dd, J = 13.3, 1.4 Hz, 14H). <sup>13</sup>C NMR (151 MHz, CDCl<sub>3</sub>) δ 181.9, 179.8, 159.3, 159.2, 138.9, 138.9, 135.7, 132.3, 127.8, 126.9, 116.7, 115.9, 114.8, 114.5, 55.4, 55.4, 55.2, 55.1, 25.7, 25.6, 18.0, 17.6. <sup>19</sup>F NMR (565 MHz, CDCl<sub>3</sub>) δ 22.74, 17.10. HRMS (ESI-TOF) m/z: M<sup>+</sup> calculated for C<sub>13</sub>H<sub>16</sub>FNOS 253.0937, found 253.0939.

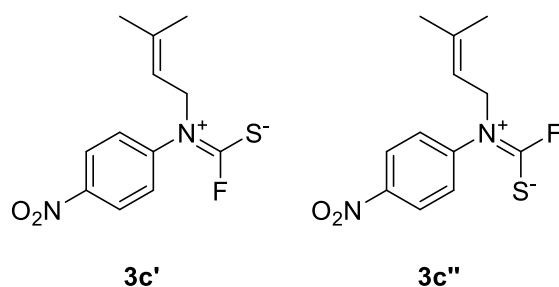

**(3-methylbut-2-en-1-yl)(4-nitrophenyl)carbamothioic fluoride (3c' and 3c'')**: The general procedure from *N*-(3-methylbut-2-en-1-yl)-4-nitroaniline (103.1 mg, 0.5 mmol), AgSCF<sub>3</sub> (155.9 mg, 0.75 mmol), KBr (147.4 mg, 1.25 mmol) and MeCN (10 mL) at room temperature for 2 h, the residue was purified by column chromatography on silica gel using petroleum ether: ethyl acetate = 30:1 to give **3c':3c''** = 3:1 as yellow solid (110.1 mg, 82% yield). Mp: 55.0-55.9 °C. <sup>1</sup>H NMR (600 MHz, CDCl<sub>3</sub>) δ 8.23 (d, J = 8.5 Hz, 4H), 7.56 – 7.23 (m, 4H), 5.25 (d, J = 13.8 Hz, 2H), 4.63 (s, 3H), 4.36 (s, 1H), 1.65 (s, 6H), 1.45 (s, 6H). <sup>13</sup>C NMR (151 MHz, CDCl<sub>3</sub>) δ 178.5, 147.1, 144.9, 139.8, 126.9, 124.8, 115.4, 54.8, 25.6, 18.0. <sup>19</sup>F NMR (565 MHz, CDCl<sub>3</sub>) δ 24.85, 19.01. HRMS (ESI-TOF) m/z: M<sup>+</sup> calculated for C<sub>12</sub>H<sub>13</sub>FN<sub>2</sub>O<sub>2</sub>S 268.0682, found 268.0685.

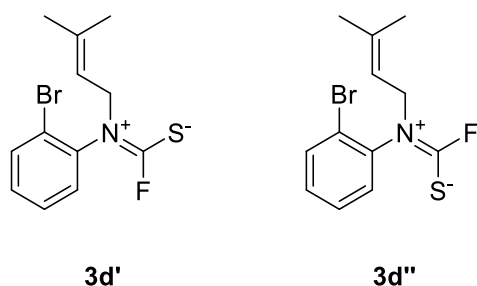

**(2-bromophenyl)(3-methylbut-2-en-1-yl)carbamothioic fluoride (3d' and 3d'')**: The general procedure from 2-bromo-*N*-(3-methylbut-2-en-1-yl)aniline (120.1 mg, 0.5 mmol), AgSCF<sub>3</sub> (155.9 mg, 0.75 mmol), KBr (147.4 mg, 1.25 mmol) and MeCN (10 mL) at room temperature for 2 h, the residue was purified by column



chromatography on silica gel using petroleum ether: ethyl acetate = 30:1 to give **3d':3d''** = 2.8:1 as yellow liquid (127.3 mg, 84% yield). <sup>1</sup>H NMR (500 MHz, CDCl<sub>3</sub>) δ 7.61 (m, 3H), 7.30 (m, 4H), 7.20 (m, 5H), 7.07 (dd, J = 7.9, 1.6 Hz, 2H), 5.38 – 5.18 (m, 4H), 4.81 (dd, J = 14.7, 6.9 Hz, 3H), 4.62 (d, J = 7.2 Hz, 1H), 4.28 (dd, J = 14.6, 8.2 Hz, 3H), 3.94 (dd, J = 14.8, 8.2 Hz, 1H), 1.64 (d, J = 10.9 Hz, 11H), 1.37 (dd, J = 7.5, 1.4 Hz, 11H). <sup>13</sup>C NMR (126 MHz, CDCl<sub>3</sub>) δ 139.9, 139.8, 138.4, 134.0, 133.6, 130.3, 130.2, 129.8, 128.8, 128.6, 128.2, 121.4, 121.4, 116.2, 115.4, 53.7, 53.7, 50.5, 50.5, 25.7, 25.7, 17.9. <sup>19</sup>F NMR (471 MHz, CDCl<sub>3</sub>) δ 24.60, 15.51. HRMS (EI-TOF) m/z: M<sup>+</sup> calculated for C<sub>12</sub>H<sub>13</sub>BrFNOS 3300.9936, found 300.9935.

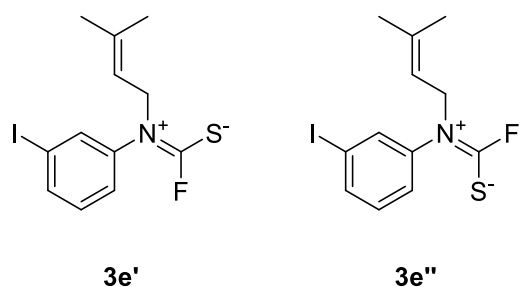

**(3-iodophenyl)(3-methylbut-2-en-1-yl)carbamothioic fluoride (3e' and 3e'')**: The general procedure from 3-iodo-*N*-(3-methylbut-2-en-1-yl)aniline (861.3 mg, 3 mmol), sulfur (384.7 mg, 12 mmol), KF (522.9 mg, 9 mmol), TMSCF<sub>3</sub> (2145 mg, 15 mmol) and THF (30 mL) at room temperature for 4 h, the residue was purified by column chromatography on silica gel using petroleum ether: ethyl acetate = 30:1 to give **3e':3e''** = 3.3:1 as yellow liquid (707 mg, 68% yield). <sup>1</sup>H NMR (500 MHz, CDCl<sub>3</sub>) δ 7.80 – 7.59 (m, 5H), 7.53 (s, 3H), 7.27 (d, J = 2.6 Hz, 1H), 7.22 – 7.10 (m, 8H), 5.34 (t, J = 7.2 Hz, 3H), 5.27 (t, J = 7.7 Hz, 1H), 4.62 (d, J = 7.2 Hz, 7H), 4.34 (d, J = 7.4 Hz, 2H), 1.74 (d, J = 5.6 Hz, 13H), 1.50 (d, J = 16.9 Hz, 13H). <sup>13</sup>C NMR (151 MHz, CDCl<sub>3</sub>) δ 181.2, 179.1, 143.8, 140.6, 139.6, 139.5, 137.6, 137.6, 135.8, 134.9, 131.1, 130.8, 126.4, 125.4, 116.5, 115.6, 93.9, 93.8, 55.0, 54.9, 51.9, 25.7, 25.7, 18.1, 17.7. <sup>19</sup>F NMR (565 MHz, CDCl<sub>3</sub>) δ 24.13, 17.81. HRMS (EI-TOF) m/z: M<sup>+</sup> calculated for C<sub>12</sub>H<sub>13</sub>FINS 348.9797, found 348.9801.

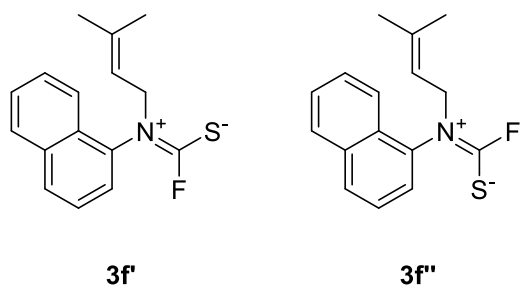

**(3-methylbut-2-en-1-yl)(naphthalen-1-yl)carbamothioic fluoride (3f' and 3f'')**: The general procedure from *N*-(3-methylbut-2-en-1-yl)naphthalen-1-amine (676.0 mg, 3 mmol), sulfur (384.7 mg, 12 mmol), KF (522.9 mg,

9 mmol), TMSCF<sub>3</sub> (2145 mg, 15 mmol) and THF (30 mL) at room temperature for 4 h, the residue was purified by column chromatography on silica gel using petroleum ether: ethyl acetate = 30:1 to give **3f':3f''** = 4.2:1 as yellow liquid (606.9 mg, 74% yield). <sup>1</sup>H NMR (500 MHz, CDCl<sub>3</sub>) δ 7.83 (dt, J = 9.9, 7.8 Hz, 10H), 7.71 (dd, J = 8.3, 1.5 Hz, 1H), 7.65 (d, J = 8.1 Hz, 4H), 7.57 – 7.30 (m, 17H), 7.24 – 7.14 (m, 5H), 5.41 – 5.25 (m, 5H), 4.90 (dd, J = 14.4, 6.9 Hz, 4H), 4.62 (dd, J = 14.6, 7.1 Hz, 1H), 4.42 (dd, J = 14.3, 7.9 Hz, 4H), 4.12 (dd, J = 14.5, 8.1 Hz, 1H), 1.64 – 1.60 (m, 3H), 1.60 – 1.53 (m, 13H), 1.25 (d, J = 1.5 Hz, 16H). <sup>13</sup>C NMR (151 MHz, CDCl<sub>3</sub>) δ 183.2, 182.5, 181.1, 180.3, 139.5, 139.5, 138.9, 136.0, 134.6, 134.3, 129.4, 129.3, 128.8, 128.7, 128.5, 128.0, 127.5, 127.3, 126.8, 126.7, 125.6, 125.2, 125.2, 124.1, 122.0, 122.0, 116.9, 115.8, 54.8, 54.8, 51.7, 51.7, 25.7, 25.6, 17.9, 17.6. <sup>19</sup>F NMR (565 MHz, CDCl<sub>3</sub>) δ 24.17, 17.15. HRMS (EI-TOF) m/z: M<sup>+</sup> calculated for C<sub>16</sub>H<sub>16</sub>FNS 273.0987, found 273.0990.

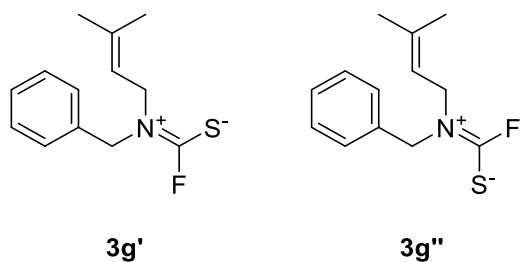

**benzyl(3-methylbut-2-en-1-yl)carbamothioic fluoride (3g' and 3g'')**: The general procedure from *N*-benzyl-3-methylbut-2-en-1-amine (771.2 mg, 4.4 mmol), sulfur (563.2 mg, 17.6 mmol), KF (766.9 mg, 13.2 mmol), TMSCF<sub>3</sub> (3146 mg, 22 mmol) and THF (44 mL) at room temperature for 4 h, the residue was purified by column chromatography on silica gel using petroleum ether: ethyl acetate = 30:1 to give **3g':3g''** = 1.1:1 as yellow liquid (884.2 mg, 85% yield). <sup>1</sup>H NMR (500 MHz, CDCl<sub>3</sub>) δ 7.28 (m, 9H), 7.13 (dd, J = 7.2, 1.6 Hz, 2H), 5.20 (m, 1H), 5.05 (m, 1H), 4.88 (s, 2H), 4.54 (s, 2H), 4.23 (d, J = 7.1 Hz, 2H), 3.90 (d, J = 7.2 Hz, 2H), 1.67 (dd, J = 14.9, 1.4 Hz, 7H), 1.53 (dd, J = 26.9, 1.4 Hz, 7H). <sup>13</sup>C NMR (126 MHz, CDCl<sub>3</sub>) δ 183.8, 182.6, 181.3, 180.0, 139.2, 138.8, 134.4, 129.0, 128.8, 128.3, 128.0, 127.6, 116.8, 116.1, 55.9, 55.9, 51.4, 51.4, 50.7, 50.7, 46.3, 46.2, 25.7, 25.7, 18.2, 17.8. <sup>19</sup>F NMR (565 MHz, CDCl<sub>3</sub>) δ 15.07, 14.69. HRMS (EI-TOF) m/z: M<sup>+</sup> calculated for C<sub>13</sub>H<sub>16</sub>FNS 237.0989, found 237.0989.

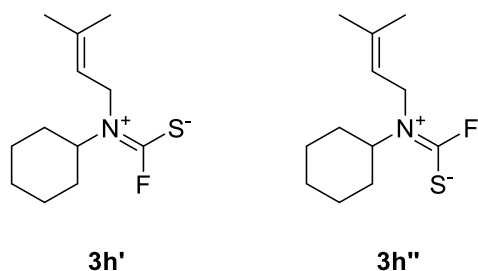

**cyclohexyl(3-methylbut-2-en-1-yl)carbamothioic fluoride (3h' and 3h'')**: The general procedure from *N*-(3-methylbut-2-en-1-yl)cyclohexanamine (836.5 mg, 5 mmol), sulfur (641.2 mg, 20 mmol), KF (871.5 mg, 20 mmol), TMSCF<sub>3</sub> (3554.8 mg, 25 mmol) and THF (50 mL) at room temperature for 4 h, the residue was purified by column chromatography on silica gel using petroleum ether: ethyl acetate = 30:1 to give **3h':3h''** = 1.3:1 as yellow liquid (822.5 mg, 72% yield). <sup>1</sup>H NMR (500 MHz, CDCl<sub>3</sub>) δ 5.15 (t, J = 6.4 Hz, 1H), 4.99 (t, J = 6.7 Hz, 1H), 4.54 (tt, J = 11.6, 4.1 Hz, 1H), 4.24 (d, J = 6.4 Hz, 2H), 3.97 – 3.77 (m, 4H), 1.93 – 1.70 (m, 11H), 1.69 – 1.54 (m, 18H), 1.53 – 1.15 (m, 12H), 1.05 (tt, J = 13.0, 3.9 Hz, 3H). <sup>13</sup>C NMR (126 MHz, CDCl<sub>3</sub>) δ 182.9, 182.9, 180.4, 180.3, 136.0, 135.8, 119.3, 118.3, 62.9, 62.8, 60.7, 60.6, 49.1, 49.0, 43.3, 43.2, 31.0, 29.6, 25.8, 25.7, 25.5, 25.3, 25.1, 18.3, 17.9. <sup>19</sup>F NMR (471 MHz, CDCl<sub>3</sub>) δ 19.39, 14.51. HRMS (EI-TOF) m/z: M<sup>+</sup> calculated for C<sub>12</sub>H<sub>20</sub>FNS 229.1300, found 229.1304.

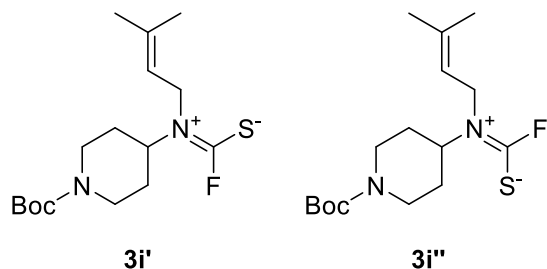

**tert-butyl 4-((fluorocarbothioyl)(3-methylbut-2-en-1-yl)amino)piperidine-1-carboxylate (3i' and 3i'')**: The general procedure from tert-butyl 4-((3-methylbut-2-en-1-yl)amino)piperidine-1-carboxylate (805.2 mg, 3 mmol), sulfur (384 mg, 12 mmol), KF (522.9 mg, 9 mmol), TMSCF<sub>3</sub> (2145 mg, 15 mmol) and THF (30 mL) at room temperature for 4 h, the residue was purified by column chromatography on silica gel using petroleum ether: ethyl acetate = 10:1 to give **3i':3i''** = 2:1 as yellow liquid (708.6 mg, 71% yield). Mp: 55.0-56.7 °C. <sup>1</sup>H NMR (500 MHz, CDCl<sub>3</sub>) δ 5.14 (m, 1H), 5.01 – 4.92 (m, 2H), 4.72 (tq, J = 12.3, 4.1 Hz, 2H), 4.31 – 4.03 (m, 8H), 3.99 (tt, J = 11.7, 4.3 Hz, 1H), 3.91 – 3.81 (m, 4H), 2.68 (d, J = 40.1 Hz, 6H), 1.83 (m, 4H), 1.70 – 1.58 (m, 24H), 1.54 – 1.44 (m, 5H), 1.40 (d, J = 2.8 Hz, 28H). <sup>13</sup>C NMR (151 MHz, CDCl<sub>3</sub>) δ 182.9, 182.6, 180.8, 154.6, 154.5, 136.6, 136.5, 118.8, 117.9, 80.1, 80.0, 61.0, 61.0, 58.6, 58.5, 49.0, 48.9, 43.4, 43.4, 30.1, 28.6, 28.4, 28.4, 25.7,

18.3, 18.0. <sup>19</sup>F NMR (565 MHz, CDCl<sub>3</sub>) δ 19.91, 15.35. HRMS (EI-TOF) m/z: M<sup>+</sup> calculated for C<sub>16</sub>H<sub>27</sub>FN<sub>2</sub>O<sub>2</sub>S 330.1777, found 330.1783.

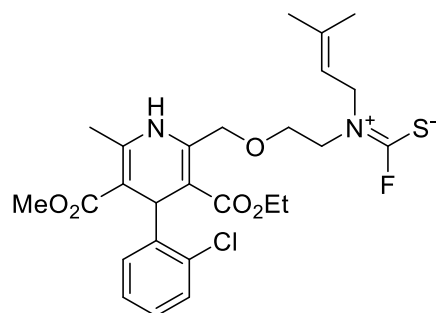

**3j'**

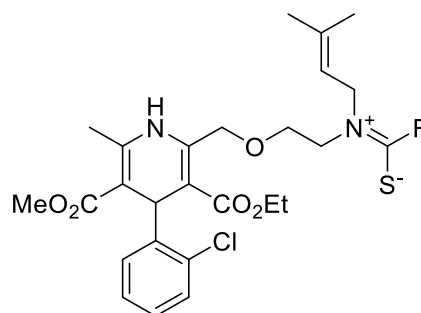

**3j''**

**3-ethyl 5-methyl 4-(2-chlorophenyl)-2-((2-((3-methylbut-2-en-1-**

**yl)amino)ethoxy)methyl)-6-methyl-1,4-dihydropyridine-3,5-dicarboxylate (3j' and 3j'')**: The general

procedure from 3-ethyl 5-methyl 4-(2-chlorophenyl)-6-methyl-2-((2-((3-methylbut-2-en-1-

yl)amino)ethoxy)methyl)-1,4-dihydropyridine-3,5-dicarboxylate (231.5 mg, 0.5 mmol), AgSCF<sub>3</sub> (155.9 mg,

0.75 mmol), KBr (147.4 mg, 1.25 mmol) and MeCN (10 mL) at room temperature for 2 h, the residue was

purified by column chromatography on silica gel using petroleum ether: ethyl acetate = 3:1 to give **3j':3j''**=

1.2:1 as white solid (222.0 mg, 85% yield). Mp: 85.5-87.2 °C. <sup>1</sup>H NMR (500 MHz, CDCl<sub>3</sub>) δ 7.31 (dd, J = 7.8, 1.7

Hz, 2H), 7.16 (dt, J = 7.9, 1.4 Hz, 2H), 7.07 (m, 4H), 6.97 (tt, J = 7.4, 1.9 Hz, 3H), 6.83 (s, 1H), 5.34 (s, 2H), 5.27

– 5.04 (m, 2H), 4.71 (dd, J = 15.8, 2.8 Hz, 2H), 4.62 (dd, J = 15.8, 6.9 Hz, 2H), 4.43 – 4.29 (m, 2H), 4.08 (d, J =

7.2 Hz, 3H), 4.04 – 3.88 (m, 8H), 3.85 – 3.73 (m, 3H), 3.70 – 3.60 (m, 4H), 3.54 (d, J = 1.2 Hz, 8H), 2.29 (d, J =

1.9 Hz, 7H), 1.77 – 1.60 (m, 15H), 1.11 (t, J = 7.1 Hz, 7H). <sup>13</sup>C NMR (126 MHz, CDCl<sub>3</sub>) δ 183.6, 181.1, 167.9,

167.9, 167.1, 167.1, 145.7, 145.6, 144.6, 144.3, 144.1, 143.9, 139.3, 139.0, 132.3, 132.2, 131.4, 129.2, 129.2,

127.4, 127.3, 126.9, 126.9, 116.8, 116.2, 104.0, 104.0, 101.6, 101.4, 68.4, 68.1, 67.6, 67.4, 59.8, 59.8, 52.4,

52.3, 51.7, 51.7, 50.8, 50.7, 48.1, 48.0, 47.8, 47.8, 37.0, 37.0, 25.7, 25.7, 19.4, 19.4, 18.2, 17.9, 14.2. <sup>19</sup>F NMR

(471 MHz, CDCl<sub>3</sub>) δ 17.58, 16.11. HRMS (ESI-TOF) m/z: [M+Na]<sup>+</sup> calculated for C<sub>26</sub>H<sub>32</sub>ClFN<sub>2</sub>NaO<sub>5</sub>S 561.1597,

found 561.1600.

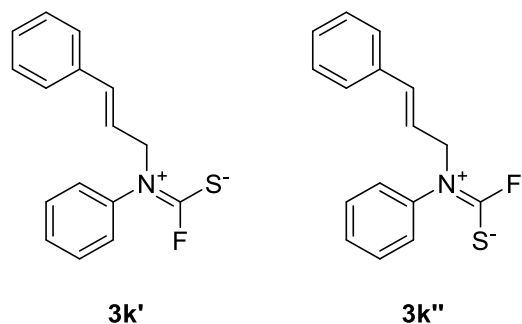

**cinnamyl(phenyl)carbamothioic fluoride (3k' and 3k'')**: The general procedure from *N*-cinnamylaniline (248.7 mg, 1.15 mmol), sulfur (147.2 mg, 4.6 mmol), KF (200.4 mg, 3.45 mmol), TMSCF<sub>3</sub> (822.3 mg, 5.75 mmol) and THF (12 mL) at room temperature for 4 h, the residue was purified by column chromatography on silica gel using petroleum ether: ethyl acetate = 30:1 to give **3k'**:**3k''** = 4.3:1 as yellow liquid (247.4 mg, 76% yield). <sup>1</sup>H NMR (600 MHz, CDCl<sub>3</sub>) δ 7.53 – 7.13 (m, 5H), 6.51 (m, 5H), 6.36 (dt, J = 16.0, 6.8 Hz, 4H), 6.24 (dt, J = 15.8, 6.7 Hz, 1H), 4.80 (d, J = 6.8 Hz, 9H), 4.53 (d, J = 6.8 Hz, 2H). <sup>13</sup>C NMR (151 MHz, CDCl<sub>3</sub>) δ 181.8, 179.7, 142.9, 139.7, 136.0, 135.7, 135.6, 135.3, 129.9, 129.6, 128.8, 128.7, 128.7, 128.6, 128.4, 128.2, 126.8, 126.6, 125.9, 121.1, 120.3, 59.4, 59.3, 56.1. <sup>19</sup>F NMR (565 MHz, CDCl<sub>3</sub>) δ 24.03, 18.31. HRMS (EI-TOF) m/z: M<sup>+</sup> calculated for C<sub>16</sub>H<sub>14</sub>FNS 271.0831, found 271.0827.

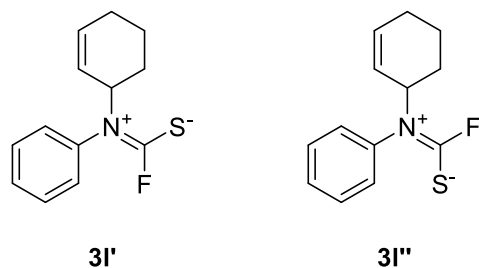

**cyclohex-2-en-1-yl(phenyl)carbamothioic fluoride (3l' and 3l'')**: The general procedure from *N*-(cyclohex-2-en-1-yl)aniline (545.8 mg, 3.15 mmol), sulfur (403.2 mg, 12.6 mmol), KF (549 mg, 9.45 mmol), TMSCF<sub>3</sub> (2252.3 mg, 15.75 mmol) and THF (12 mL) at room temperature for 4 h, the residue was purified by column chromatography on silica gel using petroleum ether: ethyl acetate = 30:1 to give **3l'**:**3l''** = 4.3:1 as white solid (519.9 mg, 70% yield). Mp: 84.7-86.6 °C. <sup>1</sup>H NMR (600 MHz, CDCl<sub>3</sub>) δ 7.42 – 7.26 (m, 3H), 7.17 – 6.99 (m, 2H), 5.83 – 5.72 (m, 1H), 5.69 (dt, J = 10.4, 2.1 Hz, 1H), 5.63 – 5.52 (m, 1H), 2.07 – 1.90 (m, 1H), 1.90 – 1.81 (m, 1H), 1.76 (m, 1H), 1.62 – 1.46 (m, 2H), 1.41 – 1.26 (m, 1H). <sup>13</sup>C NMR (151 MHz, CDCl<sub>3</sub>) δ 182.2, 180.1, 136.6, 132.2, 131.9, 129.5, 129.2, 129.0, 128.8, 128.3, 127.6, 125.8, 125.4, 61.1, 61.0, 58.8, 28.0, 26.5, 24.2, 24.1, 20.8, 20.7. <sup>19</sup>F NMR (565 MHz, CDCl<sub>3</sub>) δ 28.36, 17.33. HRMS (EI-TOF) m/z: M<sup>+</sup> calculated for C<sub>13</sub>H<sub>14</sub>FNS

235.0831, found 235.0835.

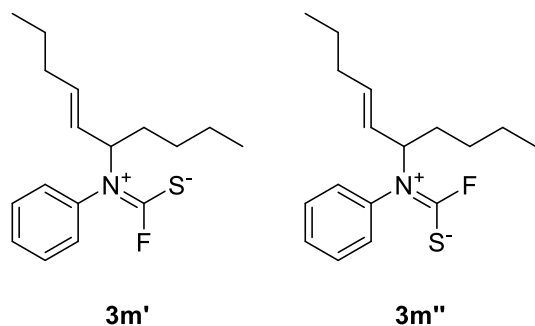

**(E)-dec-6-en-5-yl(phenyl)carbamothioic fluoride (3m' and 3m'')**: The general procedure from (E)-*N*-(dec-6-en-5-yl)aniline (140.7 mg, 0.5 mmol), AgSCF<sub>3</sub> (155.9 mg, 0.75 mmol), KBr (147.4 mg, 1.25 mmol) and MeCN (10 mL) at room temperature for 2 h, the residue was purified by column chromatography on silica gel using petroleum ether: ethyl acetate = 30:1 to give **3m':3m''** = 2.8:1 as yellow liquid (99.6 mg, 68% yield). <sup>1</sup>H NMR (600 MHz, CDCl<sub>3</sub>) δ 7.43 – 7.29 (m, 10H), 7.11 (dd, J = 7.4, 1.6 Hz, 2H), 7.04 – 6.97 (m, 5H), 5.77 (dt, J = 15.3, 6.8 Hz, 3H), 5.63 (m, 1H), 5.36 (m, 3H), 5.19 – 5.09 (m, 1H), 5.04 (m, 3H), 4.66 (q, J = 7.9 Hz, 1H), 2.06 – 1.83 (m, 7H), 1.73 – 1.57 (m, 4H), 1.52 – 1.22 (m, 29H), 0.82 (m, 22H). <sup>13</sup>C NMR (151 MHz, CDCl<sub>3</sub>) δ 181.8, 179.7, 140.4, 136.9, 136.4, 136.3, 129.4, 129.0, 128.9, 128.7, 128.3, 127.9, 126.9, 126.3, 66.3, 66.2, 65.4, 34.4, 34.2, 33.1, 31.6, 28.4, 28.2, 22.3, 22.2, 22.0, 22.0, 13.9, 13.9, 13.6, 13.6. <sup>19</sup>F NMR (565 MHz, CDCl<sub>3</sub>) δ 27.97, 17.11. HRMS (EI-TOF) m/z: M<sup>+</sup> calculated for C<sub>17</sub>H<sub>14</sub>FNS 293.1614, found 293.1609.

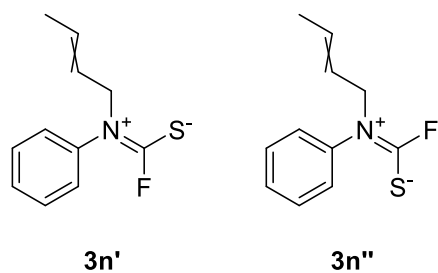

**but-2-en-1-yl(phenyl)carbamothioic fluoride (3n' and 3n'')**: The general procedure from *N*-(but-2-en-1-yl)aniline (368.1 mg, 2.5 mmol, trans and cis mixture), sulfur (320 mg, 10 mmol), KF (435.8 mg, 7.5 mmol), TMSCF<sub>3</sub> (1787.5 mg, 12.5 mmol) and THF (25 mL) at room temperature for 4 h, the residue was purified by column chromatography on silica gel using petroleum ether: ethyl acetate = 100:1 to give **3n:3n''** = 4:1 as yellow liquid (407.0 mg, 78% yield, trans: cis = 4:1). <sup>1</sup>H NMR (500 MHz, CDCl<sub>3</sub>) δ 7.45 – 7.25 (m, 35H), 7.22 (d, J = 6.7 Hz, 5H), 7.15 – 7.04 (m, 24H), 6.59 (dd, J = 17.4, 7.8 Hz, 9H), 5.76 – 5.29 (m, 31H), 4.64 (d, J = 7.0 Hz, 4H), 4.49 (d, J = 5.1 Hz, 15H), 4.35 (d, J = 7.1 Hz, 1H), 4.22 (d, J = 6.5 Hz, 4H), 3.83 – 3.68 (m, 12H), 1.72 – 1.54

(m, 37H), 1.41 (m, 7H). <sup>13</sup>C NMR (126 MHz, CDCl<sub>3</sub>) δ 148.7, 132.4, 130.3, 129.7, 129.5, 129.4, 129.0, 128.6, 128.6, 127.7, 127.1, 126.7, 126.7, 125.9, 125.8, 122.1, 116.1, 112.4, 59.2, 59.1, 56.0, 51.8, 51.5, 17.7, 17.6. <sup>19</sup>F NMR (471 MHz, CDCl<sub>3</sub>) δ 23.92, 23.29, 17.88, 17.61. HRMS (EI-TOF) m/z: M<sup>+</sup> calculated for C<sub>11</sub>H<sub>17</sub>FNS 209.0674, found 209.0676.

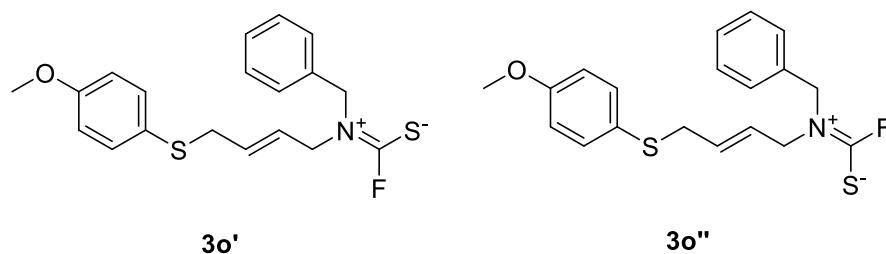

**(E)-benzyl(4-((4-methoxyphenyl)thio)but-2-en-1-yl)carbamothioic fluoride (3o' and 3o'')**: The general procedure from (E)-N-benzyl-4-((4-methoxyphenyl)thio)but-2-en-1-amine (149.7 mg, 0.5 mmol), AgSCF<sub>3</sub> (155.9 mg, 0.75 mmol), KBr (147.4 mg, 1.25 mmol) and MeCN (10 mL) at room temperature for 2 h, the residue was purified by column chromatography on silica gel using petroleum ether: ethyl acetate = 10:1 to give 3o':3o'' = 1:1 as yellow liquid (157.8 mg, 87% yield). <sup>1</sup>H NMR (500 MHz, CDCl<sub>3</sub>) δ 7.37 – 7.22 (m, 10H), 7.21 – 7.15 (m, 2H), 7.08 – 7.01 (m, 2H), 6.86 – 6.75 (m, 4H), 5.68 – 5.49 (m, 2H), 5.38 – 5.27 (m, 1H), 5.21 – 5.04 (m, 1H), 4.68 (s, 2H), 4.29 (s, 2H), 4.08 (d, J = 6.5 Hz, 2H), 3.74 (dd, J = 21.8, 7.6 Hz, 8H), 3.41 – 3.26 (m, 4H). <sup>13</sup>C NMR (126 MHz, CDCl<sub>3</sub>) δ 182.6, 181.1, 159.4, 159.4, 134.7, 134.4, 134.1, 134.0, 132.1, 131.7, 129.0, 128.9, 128.4, 128.1, 127.7, 124.8, 124.7, 124.5, 124.0, 114.6, 114.5, 55.6, 55.6, 55.4, 55.3, 53.8, 53.7, 51.1, 51.0, 49.4, 49.3, 37.8, 37.7. <sup>19</sup>F NMR (565 MHz, CDCl<sub>3</sub>) δ 27.97, 17.11. HRMS (ESI-TOF) m/z: [M+Na]<sup>+</sup> calculated for C<sub>19</sub>H<sub>20</sub>FNNaOS<sub>2</sub> 384.0863, found 384.0857.

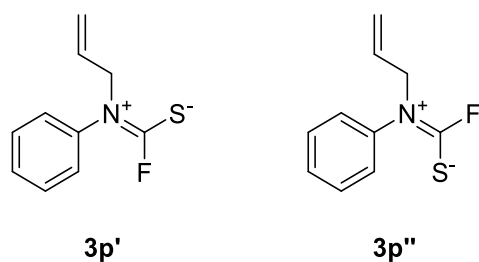

**allyl(phenyl)carbamothioic fluoride (3p' and 3p'')**: The general procedure from N-allylaniline (1688.9 mg, 12.68 mmol), sulfur (1623 mg, 50.72 mmol), KF (2206.7 mg, 38.04 mmol), TMSCF<sub>3</sub> (9066.2 mg, 63.4 mmol) and THF (127 mL) at room temperature for 4 h, the residue was purified by column chromatography on silica gel using petroleum ether: ethyl acetate = 30:1 to give 3p':3p'' = 4.3:1 as yellow liquid (1992.5 mg, 80% yield).

$^1\text{H}$  NMR (500 MHz,  $\text{CDCl}_3$ )  $\delta$  7.56 – 7.31 (m, 9H), 7.20 (dd,  $J$  = 7.5, 2.0 Hz, 4H), 5.96 (m, 3H), 5.36 – 5.20 (m, 5H), 4.67 (dq,  $J$  = 6.4, 1.2 Hz, 4H), 4.44 – 4.36 (m, 1H).  $^{13}\text{C}$  NMR (126 MHz,  $\text{CDCl}_3$ )  $\delta$  182.0, 180.8, 179.4, 142.9, 139.7, 130.4, 129.7, 129.5, 129.4, 128.7, 128.6, 126.6, 125.7, 120.3, 119.9, 59.6, 59.6, 56.5, 56.4.  $^{19}\text{F}$  NMR (471 MHz,  $\text{CDCl}_3$ )  $\delta$  23.95, 18.51. HRMS (EI-TOF)  $m/z$ :  $M^+$  calculated for  $\text{C}_{10}\text{H}_{10}\text{FNS}$  195.0518, found 195.0520.

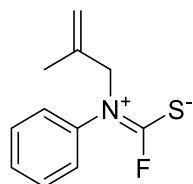

**3q'**

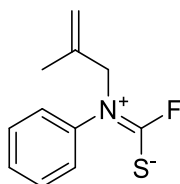

**3q''**

**allyl(phenyl)carbamothioic fluoride (3q' and 3q'')**: The general procedure from *N*-(2-methylallyl)aniline (611 mg, 4.15 mmol), sulfur (531.2 mg, 16.6 mmol), KF (723.3 mg, 12.45 mmol),  $\text{TMSCF}_3$  (2967.2 mg, 20.75 mmol) and THF (42 mL) at room temperature for 4 h, the residue was purified by column chromatography on silica gel using petroleum ether: ethyl acetate = 30:1 to give **3q':3q''** = 3.4:1 as yellow liquid (831.1 mg, 96% yield).

$^1\text{H}$  NMR (500 MHz,  $\text{CDCl}_3$ )  $\delta$  7.48 – 7.30 (m, 14H), 7.22 – 7.14 (m, 6H), 4.98 (s, 1H), 4.93 (t,  $J$  = 1.5 Hz, 3H), 4.87 – 4.81 (m, 4H), 4.67 (s, 6H), 4.34 (s, 2H), 1.81 (s, 13H).  $^{13}\text{C}$  NMR (151 MHz,  $\text{CDCl}_3$ )  $\delta$  182.4, 180.3, 143.0, 139.6, 138.2, 137.7, 129.6, 129.4, 128.6, 128.5, 126.5, 125.5, 114.9, 114.8, 62.6, 62.5, 59.7, 59.6, 20.3, 20.1.  $^{19}\text{F}$  NMR (565 MHz,  $\text{CDCl}_3$ )  $\delta$  24.93, 18.89. HRMS (EI-TOF)  $m/z$ :  $M^+$  calculated for  $\text{C}_{11}\text{H}_{12}\text{FNS}$  209.0674, found 209.0677.

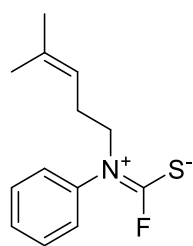

**3r'**

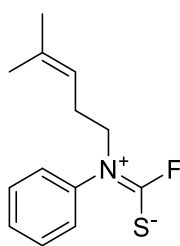

**3r''**

**(4-methylpent-3-en-1-yl)(phenyl)carbamothioic fluoride (3r' and 3r'')**: The general procedure from *N*-(4-methylpent-3-en-1-yl)aniline (280.4 mg, 1.6 mmol), sulfur (204.8 mg, 6.4 mmol), KF (278.9 mg, 4.8 mmol),  $\text{TMSCF}_3$  (1144 mg, 8 mmol) and THF (16 mL) at room temperature for 4 h, the residue was purified by column chromatography on silica gel using petroleum ether: ethyl acetate = 30:1 to give **3r':3r''** = 4.1:1 as yellow liquid (157.8 mg, 87% yield).  $^1\text{H}$  NMR (500 MHz,  $\text{CDCl}_3$ )  $\delta$  7.44 – 7.27 (m, 8H), 7.22 (dd,  $J$  = 7.5, 1.8 Hz, 1H),



7.10 (dd,  $J = 7.5, 1.8$  Hz, 4H), 4.96 (m, 2H), 4.00 – 3.90 (m, 4H), 3.72 (td,  $J = 7.5, 1.6$  Hz, 1H), 2.35 (q,  $J = 7.6$  Hz, 4H), 2.27 (q,  $J = 7.5$  Hz, 1H), 1.61 (dd,  $J = 10.5, 1.5$  Hz, 8H), 1.52 (d,  $J = 1.5$  Hz, 9H).  $^{13}\text{C}$  NMR (126 MHz,  $\text{CDCl}_3$ )  $\delta$  181.8, 179.3, 139.8, 135.5, 129.8, 129.5, 128.7, 128.6, 126.8, 125.8, 119.0, 118.7, 56.7, 56.6, 53.6, 53.6, 26.9, 25.7, 25.7, 24.8, 17.8, 17.8.  $^{19}\text{F}$  NMR (565 MHz,  $\text{CDCl}_3$ )  $\delta$  24.59, 17.15. HRMS (EI-TOF)  $m/z$ :  $M^+$  calculated for  $\text{C}_{13}\text{H}_{16}\text{FNS}$  237.0987, found 237.0981.

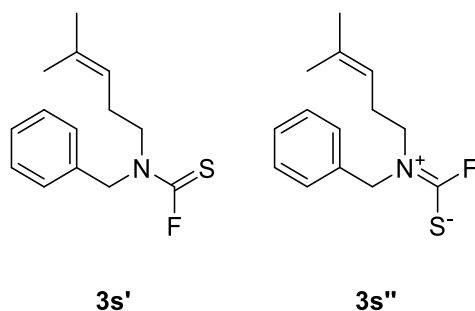

**benzyl(4-methylpent-3-en-1-yl)carbamothioic fluoride (3s' and 3s'')**: The general procedure from *N*-benzyl-4-methylpent-3-en-1-amine (378.6 mg, 2 mmol), sulfur (256 mg, 8 mmol), KF (348.6 mg, 6 mmol),  $\text{TMSCF}_3$  (1430 mg, 10 mmol) and THF (20 mL) at room temperature for 4 h, the residue was purified by column chromatography on silica gel using petroleum ether: ethyl acetate = 30:1 to give **3s':3s''** = 1.3:1 as yellow liquid (443.5 mg, 88% yield).  $^1\text{H}$  NMR (500 MHz,  $\text{CDCl}_3$ )  $\delta$  7.35 – 7.22 (m, 9H), 7.17 – 7.11 (m, 2H), 4.99 (tt,  $J = 7.3, 1.5$  Hz, 1H), 4.93 (d,  $J = 3.9$  Hz, 4H), 4.58 (s, 2H), 3.60 – 3.48 (m, 2H), 3.28 (td,  $J = 7.7, 1.9$  Hz, 2H), 2.33 (q,  $J = 7.6$  Hz, 2H), 2.18 (q,  $J = 7.5$  Hz, 3H), 1.62 (dd,  $J = 3.0, 1.5$  Hz, 7H), 1.55 (d,  $J = 1.3$  Hz, 3H), 1.50 (d,  $J = 1.3$  Hz, 4H).  $^{13}\text{C}$  NMR (126 MHz,  $\text{CDCl}_3$ )  $\delta$  182.8 (d,  $J = 321.3$  Hz), 181.1 (d,  $J = 321.1$  Hz), 135.8, 135.5, 134.4, 134.4, 129.0, 128.9, 128.3, 128.0, 127.6, 119.1, 118.7, 57.1, 57.0, 53.2, 53.2, 53.0, 52.9, 48.6, 48.6, 26.7, 25.7, 24.3, 17.7, 17.6.  $^{19}\text{F}$  NMR (471 MHz,  $\text{CDCl}_3$ )  $\delta$  15.36, 15.31. HRMS (EI-TOF)  $m/z$ :  $M^+$  calculated for  $\text{C}_{14}\text{H}_{18}\text{FNS}$  251.1144, found 251.1148.

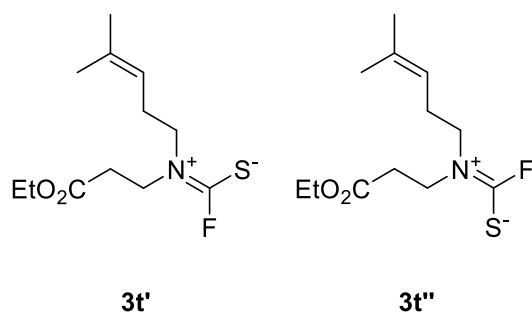

**ethyl 3-((fluorocarbonothioyl)(4-methylpent-3-en-1-yl)amino)propanoate (3t' and 3t'')**: The general

procedure from ethyl 3-((4-methylpent-3-en-1-yl)amino)propanoate (299.0 mg, 1.5 mmol), sulfur (192 mg, 6 mmol), KF (261.5 mg, 4.5 mmol), TMSCF<sub>3</sub> (1072.5 mg, 7.5 mmol) and THF (15 mL) at room temperature for 4 h, the residue was purified by column chromatography on silica gel using petroleum ether: ethyl acetate = 20:1 to give **3t':3t''** = 1.6:1 as yellow liquid (290.3 mg, 74% yield). <sup>1</sup>H NMR (500 MHz, CDCl<sub>3</sub>) δ 5.07 – 5.01 (m, 1H), 4.98 (t, J = 7.6 Hz, 1H), 4.09 (qd, J = 7.1, 1.5 Hz, 5H), 3.84 (t, J = 7.0 Hz, 3H), 3.73 – 3.54 (m, 4H), 3.52 – 3.37 (m, 3H), 2.77 (t, J = 7.0 Hz, 3H), 2.58 (t, J = 7.1 Hz, 2H), 2.38 (q, J = 7.6 Hz, 2H), 2.25 (q, J = 7.4 Hz, 3H), 1.64 (s, 8H), 1.59 (s, 3H), 1.56 (s, 5H), 1.21 (t, J = 7.2 Hz, 8H). <sup>13</sup>C NMR (126 MHz, CDCl<sub>3</sub>) δ 181.4 (d, J = 322.0 Hz), 181.3 (d, J = 321.5 Hz), 171.2, 170.4, 135.8, 135.6, 119.0, 118.6, 61.0, 60.9, 54.2, 54.1, 50.8, 50.8, 49.6, 49.5, 45.9, 45.8, 33.1, 30.7, 30.6, 27.0, 25.6, 24.6, 17.7, 17.5, 14.0, 14.0. <sup>19</sup>F NMR (471 MHz, CDCl<sub>3</sub>) δ 16.84, 15.29. HRMS (ESI-TOF) m/z: [M+Na]<sup>+</sup> calculated for C<sub>12</sub>H<sub>20</sub>FNNaO<sub>2</sub>S 284.1091, found 284.1091.

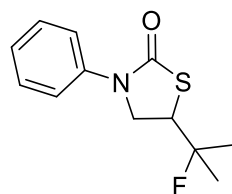

**4a**

**5-(2-fluoropropan-2-yl)-3-phenylthiazolidin-2-one (4a):** The general procedure from (3-methylbut-2-en-1-yl)(phenyl)carbamothioic fluoride **2a** (44.7 mg, 0.2 mmol), PhI(OPiv)<sub>2</sub> (162.5 mg, 0.4 mmol), Et<sub>3</sub>N·3HF (96.7 mg, 0.6 mmol) and PhMe (3 mL) at room temperature for 4 h, the residue was purified by column chromatography on silica gel using petroleum ether: ethyl acetate = 10:1 to give **4a** as white solid (43.2 mg, 90% yield). Mp: 72.9-74.0 °C. <sup>1</sup>H NMR (500 MHz, CDCl<sub>3</sub>) δ 7.43 – 7.35 (m, 4H), 7.20 (m, 1H), 4.22 (m, 1H), 4.09 (m, 1H), 3.85 (m, 1H), 1.49 (m, 6H). <sup>13</sup>C NMR (126 MHz, CDCl<sub>3</sub>) δ 169.5, 138.5, 129.1, 125.7, 122.0, 96.12 (d, J = 172.7 Hz), 51.17 (d, J = 5.0 Hz), 48.05 (d, J = 27.2 Hz), 25.15 (d, J = 23.7 Hz), 22.13 (d, J = 24.4 Hz). <sup>19</sup>F NMR (565 MHz, CDCl<sub>3</sub>) δ -141.41. HRMS (ESI-TOF) m/z: [M+Na]<sup>+</sup> calculated for C<sub>12</sub>H<sub>14</sub>FNNaOS 262.0672, found 262.0679.

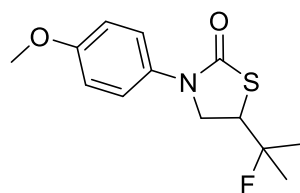

**4b**

**5-(2-fluoropropan-2-yl)-3-(4-methoxyphenyl)thiazolidin-2-one (4b):** The general procedure from (4-

methoxyphenyl)(3-methylbut-2-en-1-yl)carbamothioic fluoride **2b** (50.7 mg, 0.2 mmol), PhI(OPiv)<sub>2</sub> (162.5 mg, 0.4 mmol), Et<sub>3</sub>N·3HF (96.7 mg, 0.6 mmol) and PhMe (3 mL) at room temperature for 4 h, the residue was purified by column chromatography on silica gel using petroleum ether: ethyl acetate = 5:1 to give **4b** as yellow liquid (43.8 mg, 81% yield). <sup>1</sup>H NMR (500 MHz, CDCl<sub>3</sub>) δ 7.25 – 7.17 (m, 2H), 6.87 – 6.80 (m, 2H), 4.09 (dd, J = 10.8, 8.0 Hz, 1H), 3.95 (dd, J = 10.8, 3.9 Hz, 1H), 3.81 – 3.67 (m, 4H), 1.42 (t, J = 21.9 Hz, 6H). <sup>13</sup>C NMR (151 MHz, CDCl<sub>3</sub>) δ 169.4, 157.6, 131.4, 124.1, 114.4, 96.17 (d, J = 172.4 Hz), 55.4, 51.59 (d, J = 5.0 Hz), 48.06 (d, J = 27.1 Hz), 25.14 (d, J = 23.7 Hz), 22.13 (d, J = 24.2 Hz). <sup>19</sup>F NMR (565 MHz, CDCl<sub>3</sub>) δ -141.46. HRMS (ESI-TOF) m/z: [M+Na]<sup>+</sup> calculated for C<sub>13</sub>H<sub>16</sub>FNNaO<sub>2</sub>S 292.0778, found 292.0770.

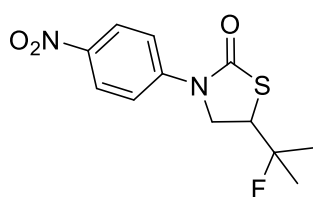

**4c**

**5-(2-fluoropropan-2-yl)-3-(4-nitrophenyl)thiazolidin-2-one (4c):** The general procedure from (3-methylbut-2-en-1-yl)(4-nitrophenyl)carbamothioic fluoride **2c** (53.7 mg, 0.2 mmol), PhI(OPiv)<sub>2</sub> (162.5 mg, 0.4 mmol), Et<sub>3</sub>N·3HF (96.7 mg, 0.6 mmol) and PhMe (3 mL) at room temperature for 4 h, the residue was purified by column chromatography on silica gel using petroleum ether: ethyl acetate = 5:1 to give **4c** as white solid (52 mg, 91% yield). Mp: 75.3-79.0 °C. <sup>1</sup>H NMR (500 MHz, CDCl<sub>3</sub>) δ 8.33 – 8.20 (m, 2H), 7.72 – 7.60 (m, 2H), 4.29 (dd, J = 10.6, 7.9 Hz, 1H), 4.20 (dd, J = 10.6, 4.3 Hz, 1H), 3.94 (m, 1H), 1.53 (d, J = 2.7 Hz, 3H), 1.49 (d, J = 2.6 Hz, 3H). <sup>13</sup>C NMR (126 MHz, CDCl<sub>3</sub>) δ 170.1, 143.9, 143.9, 124.7, 120.4, 95.7 (d, J = 173.7 Hz), 50.5 (d, J = 5.0 Hz), 47.9 (d, J = 27.1 Hz), 25.2 (d, J = 23.9 Hz), 22.4 (d, J = 24.2 Hz). <sup>19</sup>F NMR (565 MHz, CDCl<sub>3</sub>) δ -142.36. HRMS (ESI-TOF) m/z: [M+Na]<sup>+</sup> calculated for C<sub>12</sub>H<sub>13</sub>FN<sub>2</sub>NaO<sub>3</sub>S 307.1523, found 307.1532.

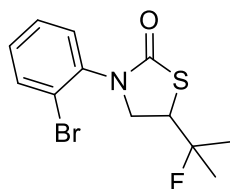

**4d**

**3-(2-bromophenyl)-5-(2-fluoropropan-2-yl)thiazolidin-2-one (4d):** The general procedure from (2-bromophenyl)(3-methylbut-2-en-1-yl)carbamothioic fluoride **2d** (60.4 mg, 0.2 mmol), PhI(OPiv)<sub>2</sub> (162.5 mg, 0.4 mmol), Et<sub>3</sub>N·3HF (96.7 mg, 0.6 mmol) and PhMe (3 mL) at room temperature for 4 h, the residue was

purified by column chromatography on silica gel using petroleum ether: ethyl acetate = 10:1 to give **4d** as yellow liquid (57 mg, 90% yield).  $^1\text{H}$  NMR (500 MHz,  $\text{CDCl}_3$ )  $\delta$  7.59 (dd,  $J$  = 8.1, 1.4 Hz, 1H), 7.31 (td,  $J$  = 7.6, 1.4 Hz, 1H), 7.24 (dd,  $J$  = 7.9, 1.7 Hz, 1H), 7.17 (td,  $J$  = 7.7, 1.7 Hz, 1H), 4.05 (d,  $J$  = 10.7 Hz, 1H), 3.97 (m, 1H), 3.92 – 3.79 (m, 1H), 1.53 (d,  $J$  = 21.2 Hz, 3H), 1.43 (d,  $J$  = 21.4 Hz, 3H).  $^{13}\text{C}$  NMR (126 MHz,  $\text{CDCl}_3$ )  $\delta$  170.2, 137.5, 133.9, 130.1, 129.6, 128.7, 122.5, 95.8 (d,  $J$  = 172.7 Hz), 51.1 (d,  $J$  = 5.3 Hz), 49.5 (d,  $J$  = 26.3 Hz), 25.25 (d,  $J$  = 23.7 Hz), 23.05 (d,  $J$  = 24.0 Hz).  $^{19}\text{F}$  NMR (565 MHz,  $\text{CDCl}_3$ )  $\delta$  -142.01. HRMS (ESI-TOF)  $m/z$ :  $[\text{M}+\text{Na}]^+$  calculated for  $\text{C}_{12}\text{H}_{13}\text{BrFNNaOS}$  339.9777, found 339.9778.

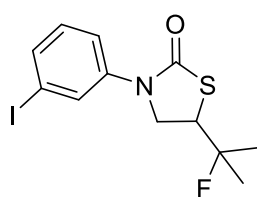

**4e**

**5-(2-fluoropropan-2-yl)-3-(3-iodophenyl)thiazolidin-2-one (4e):** The general procedure from (3-iodophenyl)(3-methylbut-2-en-1-yl)carbamothioic fluoride **2e** (69.8 mg, 0.2 mmol),  $\text{PhI}(\text{OPiv})_2$  (162.5 mg, 0.4 mmol),  $\text{Et}_3\text{N}\cdot 3\text{HF}$  (96.7 mg, 0.6 mmol) and PhMe (3 mL) at room temperature for 4 h, the residue was purified by column chromatography on silica gel using petroleum ether: ethyl acetate = 10:1 to give **4e** as yellow liquid (67.6 mg, 93% yield).  $^1\text{H}$  NMR (600 MHz,  $\text{CDCl}_3$ )  $\delta$  7.67 (m, 1H), 7.46 (m, 1H), 7.37 – 7.32 (m, 1H), 7.03 (t,  $J$  = 8.0 Hz, 1H), 4.11 (dd,  $J$  = 10.7, 7.9 Hz, 1H), 3.99 (dd,  $J$  = 10.7, 3.9 Hz, 1H), 3.78 (m, 1H), 1.41 (m, 6H).  $^{13}\text{C}$  NMR (151 MHz,  $\text{CDCl}_3$ )  $\delta$  169.6, 139.6, 134.6, 130.5, 130.3, 121.0, 96.0 (d,  $J$  = 173.0 Hz), 94.1, 50.9 (d,  $J$  = 5.0 Hz), 48.0 (d,  $J$  = 27.2 Hz), 25.2 (d,  $J$  = 23.8 Hz), 22.2 (d,  $J$  = 24.2 Hz).  $^{19}\text{F}$  NMR (565 MHz,  $\text{CDCl}_3$ )  $\delta$  -141.65. HRMS (ESI-TOF)  $m/z$ :  $[\text{M}+\text{Na}]^+$  calculated for  $\text{C}_{12}\text{H}_{13}\text{FINNaOS}$  387.9639, found 387.9650.

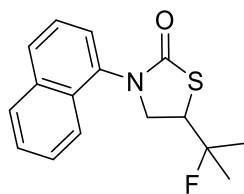

**4f**

**5-(2-fluoropropan-2-yl)-3-(naphthalen-1-yl)thiazolidin-2-one (4f):** The general procedure from (3-methylbut-2-en-1-yl)(naphthalen-1-yl)carbamothioic fluoride **2f** (54.7 mg, 0.2 mmol),  $\text{PhI}(\text{OPiv})_2$  (162.5 mg, 0.4 mmol),  $\text{Et}_3\text{N}\cdot 3\text{HF}$  (96.7 mg, 0.6 mmol) and PhMe (3 mL) at room temperature for 4 h, the residue was

purified by column chromatography on silica gel using petroleum ether: ethyl acetate = 10:1 to give **4f** as white solid (55.3 mg, 96% yield). Mp: 118.2-119.4 °C. <sup>1</sup>H NMR (500 MHz, CDCl<sub>3</sub>) δ 7.77 (m, 3H), 7.54 – 7.36 (m, 3H), 7.32 (d, J = 7.3 Hz, 1H), 4.11 (t, J = 9.4 Hz, 1H), 3.95 (d, J = 34.1 Hz, 2H), 1.53 (d, J = 21.2 Hz, 3H), 1.42 (d, J = 21.2 Hz, 3H). <sup>13</sup>C NMR (126 MHz, CDCl<sub>3</sub>) δ 170.30, 135.00, 134.59, 129.64, 128.95, 128.61, 127.09, 126.52, 125.53, 125.10, 124.15, 122.71, 122.28, 95.60 (d, J = 173.2 Hz), 52.80, 49.54, 25.01 (d, J = 24.0 Hz), 23.29. <sup>19</sup>F NMR (565 MHz, CDCl<sub>3</sub>) δ -142.51, -144.47. HRMS (ESI-TOF) m/z: [M+Na]<sup>+</sup> calculated for C<sub>16</sub>H<sub>16</sub>FNNaOS 312.0829, found 312.0826.

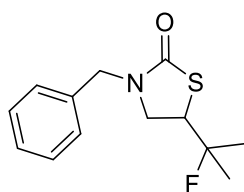

**4g**

**3-benzyl-5-(2-fluoropropan-2-yl)thiazolidin-2-one (4g):** The general procedure from benzyl(3-methylbut-2-en-1-yl)carbamothioic fluoride **2g** (47.5 mg, 0.2 mmol), PhI(OPiv)<sub>2</sub> (162.5 mg, 0.4 mmol), Et<sub>3</sub>N·3HF (96.7 mg, 0.6 mmol) and PhMe (3 mL) at room temperature for 4 h, the residue was purified by column chromatography on silica gel using petroleum ether: dichloromethane = 1:2 to give **4g** as yellow liquid (45 mg, 89% yield). <sup>1</sup>H NMR (600 MHz, CDCl<sub>3</sub>) δ 7.31 – 7.26 (m, 2H), 7.26 – 7.21 (m, 1H), 7.21 – 7.16 (m, 2H), 4.39 (s, 2H), 3.67 (m, 1H), 3.47 (dd, J = 11.0, 8.4 Hz, 1H), 3.40 (dd, J = 10.9, 4.3 Hz, 1H), 1.27 (t, J = 21.3 Hz, 6H). <sup>13</sup>C NMR (151 MHz, CDCl<sub>3</sub>) δ 170.40, 135.45, 128.81, 128.34, 128.00, 96.10 (d, J = 171.9 Hz), 48.60, 48.36 (d, J = 5.0 Hz), 48.18 (d, J = 27.0 Hz), 25.12 (d, J = 24.0 Hz), 22.00 (d, J = 24.4 Hz). <sup>19</sup>F NMR (565 MHz, CDCl<sub>3</sub>) δ -141.43. HRMS (ESI-TOF) m/z: [M+Na]<sup>+</sup> calculated for C<sub>13</sub>H<sub>16</sub>FNNaOS 276.0829, found 276.0827.

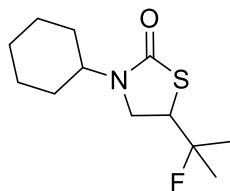

**4h**

**3-cyclohexyl-5-(2-fluoropropan-2-yl)thiazolidin-2-one (4h):** The general procedure from cyclohexyl(3-methylbut-2-en-1-yl)carbamothioic fluoride **2h** (43.9 mg, 0.2 mmol), PhI(OPiv)<sub>2</sub> (162.5 mg, 0.4 mmol), Et<sub>3</sub>N·3HF (96.7 mg, 0.6 mmol) and PhMe (3 mL) at room temperature for 4 h, the residue was purified by column chromatography on silica gel using petroleum ether: ethyl acetate = 20:1 to give **4h** as white solid (39

mg, 79% yield). Mp: 48.6-49.5 °C. <sup>1</sup>H NMR (500 MHz, CDCl<sub>3</sub>) δ 3.98 (tt, J = 11.9, 3.8 Hz, 1H), 3.74 (m, 1H), 3.66 (m, 2H), 1.90 – 1.73 (m, 4H), 1.73 – 1.65 (m, 1H), 1.52 – 1.32 (m, 11H). <sup>13</sup>C NMR (126 MHz, CDCl<sub>3</sub>) δ 169.6, 96.7 (d, J = 171.7 Hz), 53.6, 48.2 (d, J = 26.4 Hz), 45.0 (d, J = 5.0 Hz), 30.3 (d, J = 27.2 Hz), 25.6, 25.5, 25.5 (d, J = 23.9 Hz), 25.4, 21.8, 21.6. <sup>19</sup>F NMR (565 MHz, CDCl<sub>3</sub>) δ -140.86. HRMS (ESI-TOF) m/z: [M+Na]<sup>+</sup> calculated for C<sub>18</sub>H<sub>20</sub>FNNaOS 268.1142, found 268.1151.

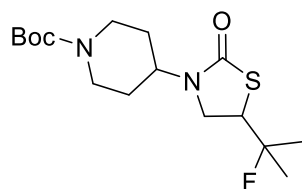

**4i**

**tert-butyl 4-(5-(2-fluoropropan-2-yl)-2-oxothiazolidin-3-yl)piperidine-1-carboxylate (4i):** The general procedure from tert-butyl 4-((fluorocarbonothioyl)(3-methylbut-2-en-1-yl)amino)piperidine-1-carboxylate **2i** (66.1 mg, 0.2 mmol), PhI(OPiv)<sub>2</sub> (162.5 mg, 0.4 mmol), Et<sub>3</sub>N·3HF (96.7 mg, 0.6 mmol) and PhMe (3 mL) at room temperature for 4 h, the residue was purified by column chromatography on silica gel using petroleum ether: ethyl acetate = 5:1 to give **4i** as white solid (60.4 mg, 87% yield). Mp: 69.1-72 °C. <sup>1</sup>H NMR (500 MHz, CDCl<sub>3</sub>) δ 4.34 – 3.98 (m, 3H), 3.68 (m, 1H), 3.60 – 3.50 (m, 2H), 2.70 (s, 2H), 1.70 – 1.61 (m, 2H), 1.55 (m, 2H), 1.44 – 1.29 (m, 15H). <sup>13</sup>C NMR (151 MHz, CDCl<sub>3</sub>) δ 169.98, 154.44, 96.26 (d, J = 172.3 Hz), 79.83, 51.77, 48.28 (d, J = 27.2 Hz), 44.90 (d, J = 5.0 Hz), 43.0, 29.19 (d, J = 29.3 Hz), 28.35, 25.33 (d, J = 23.9 Hz), 21.98, 21.82. <sup>19</sup>F NMR (565 MHz, CDCl<sub>3</sub>) δ -141.25, 141.66. HRMS (ESI-TOF) m/z: [M+Na]<sup>+</sup> calculated for C<sub>16</sub>H<sub>27</sub>FN<sub>2</sub>NaO<sub>3</sub>S 369.1619, found 369.1618.

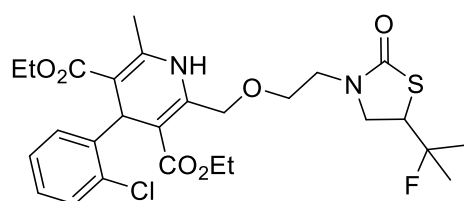

**4j**

**3-ethyl 5-methyl 4-(2-chlorophenyl)-2-((2-(5-(2-fluoropropan-2-yl)-2-oxothiazolidin-3-yl)ethoxy)methyl)-6-methyl-1,4-dihydropyridine-3,5-dicarboxylate (4j):** The general procedure from 3-ethyl 5-methyl 4-(2-chlorophenyl)-2-((2-((fluorocarbonothioyl)(3-methylbut-2-en-1-yl)amino)ethoxy)methyl)-6-methyl-1,4-dihydropyridine-3,5-dicarboxylate **2j** (105.0 mg, 0.2 mmol), PhI(OPiv)<sub>2</sub> (162.5 mg, 0.4 mmol), Et<sub>3</sub>N·3HF (96.7

mg, 0.6 mmol) and PhMe (3 mL) at room temperature for 4 h, the residue was purified by column chromatography on silica gel using petroleum ether: ethyl acetate = 1:1 to give **4j** as yellow liquid (74.5 mg, 67% yield). <sup>1</sup>H NMR (600 MHz, CDCl<sub>3</sub>) δ 7.40 (m, 1H), 7.28 – 7.22 (m, 2H), 7.15 (m, 1H), 7.10 – 7.03 (m, 1H), 5.42 (s, 1H), 4.86 – 4.63 (m, 2H), 4.11 – 4.01 (m, 2H), 3.87 – 3.70 (m, 5H), 3.70 – 3.50 (m, 5H), 2.39 (s, 3H), 1.54 – 1.41 (m, 6H), 1.21 (t, J = 7.1 Hz, 3H). <sup>13</sup>C NMR (126 MHz, CDCl<sub>3</sub>) δ 171.3, 171.2, 168.0, 167.2, 145.9, 144.9, 144.9, 144.6, 144.6, 132.3, 131.5, 131.5, 129.2, 127.3, 126.9, 126.8, 103.8, 103.8, 101.4, 101.3, 96.9, 95.5, 68.1, 68.1, 67.8, 67.6, 59.8, 50.8, 49.4, 49.4, 49.3, 49.2, 48.5, 48.5, 48.3, 48.3, 44.4, 44.4, 37.0, 37.0, 29.7, 25.5, 25.5, 25.3, 25.3, 22.0, 22.0, 21.8, 21.8, 19.1, 19.1, 14.3. <sup>19</sup>F NMR (471 MHz, CDCl<sub>3</sub>) δ -142.13, -142.19. HRMS (ESI-TOF) m/z: [M+Na]<sup>+</sup> calculated for C<sub>26</sub>H<sub>32</sub>ClFN<sub>2</sub>NaO<sub>6</sub>S 577.1546, found 577.1535.

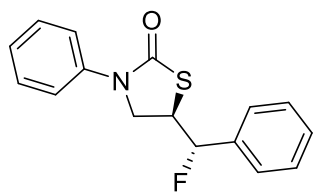

**4k**

**5-(fluorophenyl)methyl-3-phenylthiazolidin-2-one (4k):** The general procedure from cinnamyl(phenyl)carbamothioic fluoride **2k** (54.3 mg, 0.2 mmol), PhI(OPiv)<sub>2</sub> (162.5 mg, 0.4 mmol), Et<sub>3</sub>N·3HF (96.7 mg, 0.6 mmol) and PhMe (3 mL) at room temperature for 4 h, the residue was purified by column chromatography on silica gel using petroleum ether: ethyl acetate = 5:1 to give **4k** as white solid (43.2 mg, 75% yield). Mp: 107.7-111.1 °C. <sup>1</sup>H NMR (600 MHz, CDCl<sub>3</sub>) δ 7.47 – 7.34 (m, 9H), 7.21 (tt, J = 5.5, 3.0 Hz, 1H), 5.50 (dd, J = 47.2, 9.1 Hz, 1H), 4.30 (m, 2H), 4.07 (m, 1H). <sup>13</sup>C NMR (126 MHz, CDCl<sub>3</sub>) δ 13C NMR (126 MHz, Chloroform-d) δ 169.0, 138.6, 136.1, 135.9, 129.7, 129.6, 129.1, 128.7, 126.8, 126.7, 125.8, 122.0, 93.96 (d, J = 180.3 Hz), 52.12 (d, J = 3.8 Hz), 45.16 (d, J = 28.7 Hz). <sup>19</sup>F NMR (565 MHz, CDCl<sub>3</sub>) δ -168.37. HRMS (ESI-TOF) m/z: [M+Na]<sup>+</sup> calculated for C<sub>16</sub>H<sub>14</sub>FNNaOS 310.0672, found 310.0675.

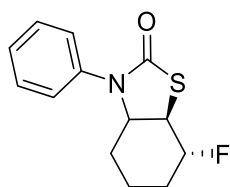

**4l**

**7-fluoro-3-phenylhexahydrobenzo[d]thiazol-2(3H)-one (4l):** The general procedure from cyclohex-2-en-1-yl(phenyl)carbamothioic fluoride **2l** (47.1 mg, 0.2 mmol), PhI(OPiv)<sub>2</sub> (162.5 mg, 0.4 mmol), Et<sub>3</sub>N·3HF (96.7 mg,

0.6 mmol) and PhMe (3 mL) at room temperature for 4 h, the residue was purified by column chromatography on silica gel using petroleum ether: ethyl acetate = 10:1 to give **4l** as white solid (42.1 mg, 84% yield). Mp: 112.4-113.2 °C. <sup>1</sup>H NMR (500 MHz, CDCl<sub>3</sub>) δ 7.34 (m, 2H), 7.26 – 7.20 (m, 1H), 7.20 – 7.14 (m, 2H), 4.77 (m, 1H), 4.37 (m, 1H), 3.80 (dt, J = 13.8, 6.1 Hz, 1H), 2.04 (m, 1H), 1.87 – 1.76 (m, 1H), 1.72 – 1.57 (m, 2H), 1.57 – 1.33 (m, 2H). <sup>13</sup>C NMR (126 MHz, CDCl<sub>3</sub>) δ 171.27, 137.55, 129.37, 127.30, 125.98, 92.14 (d, J = 175.3 Hz), 61.48 (d, J = 4.7 Hz), 47.14 (d, J = 25.4 Hz), 28.72 (d, J = 19.3 Hz), 25.98, 17.08 (d, J = 7.6 Hz). <sup>19</sup>F NMR (565 MHz, CDCl<sub>3</sub>) δ -176.14. HRMS (ESI-TOF) m/z: [M+Na]<sup>+</sup> calculated for C<sub>13</sub>H<sub>14</sub>FNNaOS 274.0668, found 274.0668.

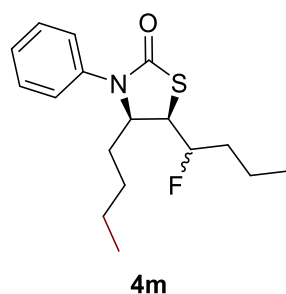

**5-butyl-5-(1-fluorobutyl)-3-phenylthiazolidin-2-one (4m):** The general procedure from (E)-dec-6-en-5-yl(phenyl)carbamothioic fluoride **2m** (58.1 mg, 0.2 mmol), PhI(OPiv)<sub>2</sub> (162.5 mg, 0.4 mmol), Et<sub>3</sub>N·3HF (96.7 mg, 0.6 mmol) and PhMe (3 mL) at room temperature for 4 h, the residue was purified by column chromatography on silica gel using petroleum ether: ethyl acetate = 50:1 to give anti-**4m** and syn-**4m** as yellow liquid (anti-**4m**: 36.2 mg, 58% yield; syn-**4m**: 13.7 mg, 22% yield). anti-**4m**: <sup>1</sup>H NMR (500 MHz, CDCl<sub>3</sub>) δ 7.38 – 7.27 (m, 4H), 7.18 (tt, J = 6.9, 1.4 Hz, 1H), 4.54 (m, 1H), 4.33 (dd, J = 9.2, 3.4 Hz, 1H), 3.30 (dd, J = 9.4, 8.0 Hz, 1H), 1.85 – 1.68 (m, 2H), 1.67 – 1.50 (m, 3H), 1.43 (m, 1H), 1.32 – 1.19 (m, 4H), 0.92 (t, J = 7.3 Hz, 3H), 0.78 (td, J = 8.5, 7.0, 4.8 Hz, 3H). <sup>13</sup>C NMR (126 MHz, CDCl<sub>3</sub>) δ 168.2, 137.6, 129.3, 126.7, 125.2, 93.9 (d, J = 177.4 Hz), 63.6 (d, J = 4.7 Hz), 48.3 (d, J = 23.4 Hz), 34.7, 34.5, 31.1, 27.1, 22.3, 18.2 (d, J = 2.7 Hz), 13.8 (d, J = 8.3 Hz). <sup>19</sup>F NMR (471 MHz, CDCl<sub>3</sub>) δ -179.22. HRMS (ESI-TOF) m/z: [M+Na]<sup>+</sup> calculated for C<sub>17</sub>H<sub>24</sub>FNNaOS 332.1446, found 332.1445. syn-**4m**: <sup>1</sup>H NMR (500 MHz, CDCl<sub>3</sub>) δ 7.46 – 7.39 (m, 2H), 7.39 – 7.33 (m, 2H), 7.31 – 7.24 (m, 1H), 4.95 – 4.75 (m, 1H), 4.47 (q, J = 6.1 Hz, 1H), 4.28 (dt, J = 9.8, 6.7 Hz, 1H), 1.89 – 1.60 (m, 5H), 1.53 (m, 1H), 1.40 – 1.15 (m, 4H), 1.01 (t, J = 7.2 Hz, 3H), 0.82 (t, J = 7.2 Hz, 3H). <sup>13</sup>C NMR (126 MHz, CDCl<sub>3</sub>) δ 169.4, 138.3, 129.3, 126.8, 125.5, 91.0 (d, J = 173.6 Hz), 64.0 (d, J = 1.9 Hz), 49.5 (d, J = 25.8 Hz), 36.5 (d, J =



21.1 Hz), 28.4 (d, J = 1.8 Hz), 27.7 (d, J = 2.2 Hz), 22.8, 17.9 (d, J = 3.1 Hz), 13.8 (d, J = 6.3 Hz). <sup>19</sup>F NMR (471 MHz, CDCl<sub>3</sub>) δ -179.54. HRMS (ESI-TOF) m/z: [M+Na]<sup>+</sup> calculated for C<sub>17</sub>H<sub>24</sub>FNNaOS 332.1455, found 332.1445.

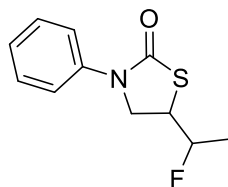

**4n**

**5-(1-fluoroethyl)-3-phenylthiazolidin-2-one (4n):** The general procedure from but-2-en-1-yl(phenyl)carbamothioic fluoride **2n** (41.9 mg, 0.2 mmol, trans : cis = 4:1), PhI(OPiv)<sub>2</sub> (162.5 mg, 0.4 mmol), Et<sub>3</sub>N·3HF (96.7 mg, 0.6 mmol) and PhMe (3 mL) at room temperature for 4 h, the residue was purified by column chromatography on silica gel using petroleum ether: ethyl acetate = 50:1 to give **4n** as yellow liquid (anti-**4n**: 26.9 mg, 60% yield, syn-**4n**: 10.6 mg, 24% yield). anti-**4n**: <sup>1</sup>H NMR (500 MHz, CDCl<sub>3</sub>) δ 7.41 – 7.27 (m, 4H), 7.14 (qt, J = 5.5, 2.9 Hz, 1H), 4.70 (ddq, J = 48.5, 9.1, 6.1 Hz, 1H), 4.18 (ddd, J = 10.7, 7.0, 1.1 Hz, 1H), 4.08 (dd, J = 10.6, 3.4 Hz, 1H), 3.62 (dtd, J = 9.1, 7.2, 3.4 Hz, 1H), 1.41 (dd, J = 24.0, 6.1 Hz, 3H). <sup>13</sup>C NMR (126 MHz, CDCl<sub>3</sub>) δ 169.0, 138.6, 129.1, 125.8, 122.0, 90.5 (d, J = 175.1 Hz), 52.2 (d, J = 5.3 Hz), 45.0 (d, J = 24.4 Hz), 18.8 (d, J = 22.4 Hz). <sup>19</sup>F NMR (471 MHz, CDCl<sub>3</sub>) δ -170.47. HRMS (ESI-TOF) m/z: [M+Na]<sup>+</sup> calculated for C<sub>11</sub>H<sub>12</sub>FNNaOS 248.0516, found 248.0522. syn-**4n**: <sup>1</sup>H NMR (500 MHz, CDCl<sub>3</sub>) δ 7.37 – 7.28 (m, 4H), 7.14 (dq, J = 8.6, 4.0 Hz, 1H), 4.78 (dq, J = 46.9, 6.3, 4.9 Hz, 1H), 4.15 (dd, J = 10.5, 7.8 Hz, 1H), 3.94 (dd, J = 10.4, 4.7 Hz, 1H), 3.87 (ddt, J = 14.8, 7.8, 4.9 Hz, 1H), 1.41 (dd, J = 23.6, 6.2 Hz, 3H). <sup>13</sup>C NMR (126 MHz, CDCl<sub>3</sub>) δ 169.39, 138.53, 129.13, 125.82, 122.09, δ 90.50 (d, J = 174.8 Hz), 51.39 (d, J = 4.4 Hz), 44.56 (d, J = 23.3 Hz), 17.05 (d, J = 22.8 Hz). <sup>19</sup>F NMR (471 MHz, CDCl<sub>3</sub>) δ -175.30. HRMS (ESI-TOF) m/z: [M+Na]<sup>+</sup> calculated for C<sub>11</sub>H<sub>12</sub>FNNaOS 248.0516, found 248.0519.

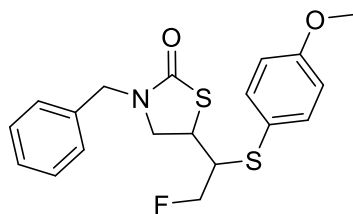

**4o**

**5-(fluoro(phenyl)methyl)-3-phenylthiazolidin-2-one (4o):** The general procedure from (E)-benzyl(4-(4-methoxyphenyl)thio)but-2-en-1-yl)carbamothioic fluoride **2o** (63.3 mg, 0.2 mmol), PhI(OPiv)<sub>2</sub> (162.5 mg, 0.4

mmol), Et<sub>3</sub>N·3HF (96.7 mg, 0.6 mmol) and PhMe (3 mL) at room temperature for 4 h, the residue was purified by column chromatography on silica gel using petroleum ether: ethyl acetate = 5:1 to give **4o** as yellow liquid (32.4 mg, 43% yield). <sup>1</sup>H NMR (500 MHz, CDCl<sub>3</sub>) δ 7.35 – 7.15 (m, 7H), 6.80 – 6.70 (m, 2H), 4.65 – 4.40 (m, 3H), 4.34 (d, J = 14.8 Hz, 1H), 3.74 (s, 3H), 3.70 – 3.59 (m, 3H), 3.03 (m, 1H). <sup>13</sup>C NMR (126 MHz, CDCl<sub>3</sub>) δ 170.41, 160.34, 136.37, 135.75, 128.88, 128.27, 127.95, 121.90, 114.95, 82.85 (d, J = 175.3 Hz), 55.37, 54.07 (d, J = 18.3 Hz), 51.68, 48.58, 42.09 (d, J = 2.9 Hz). <sup>19</sup>F NMR (471 MHz, CDCl<sub>3</sub>) δ -221.57. HRMS (ESI-TOF) m/z: [M+Na]<sup>+</sup> calculated for C<sub>19</sub>H<sub>20</sub>FNNaO<sub>2</sub>S<sub>2</sub> 400.0812, found 400.0811.

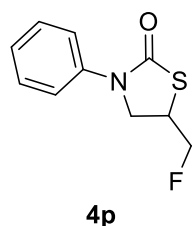

**5-(fluoromethyl)-3-phenylthiazolidin-2-one (4p):** The general procedure from allyl(phenyl)carbamothioic fluoride **2p** (39.1 mg, 0.2 mmol), PhI(OPiv)<sub>2</sub> (162.5 mg, 0.4 mmol), Et<sub>3</sub>N·3HF (96.7 mg, 0.6 mmol) and PhMe (3 mL) at room temperature for 4 h, the residue was purified by column chromatography on silica gel using petroleum ether: ethyl acetate = 5:1 to give **4p** as yellow liquid (21.1 mg, 50% yield). <sup>1</sup>H NMR (500 MHz, CDCl<sub>3</sub>) δ 7.42 (m, 4H), 7.24 (m, 1H), 4.62 (d, J = 7.2 Hz, 1H), 4.52 (d, J = 7.3 Hz, 1H), 4.31 (dd, J = 10.7, 6.7 Hz, 1H), 4.10 (dd, J = 10.6, 2.6 Hz, 1H), 3.96 (m, 1H). <sup>13</sup>C NMR (151 MHz, CDCl<sub>3</sub>) δ 168.97, 138.58, 129.11, 125.86, 122.04, 82.49 (d, J = 179.2 Hz), 51.76 (d, J = 3.4 Hz), 39.06 (d, J = 22.3 Hz). <sup>19</sup>F NMR (565 MHz, CDCl<sub>3</sub>) δ -211.10. HRMS (ESI-TOF) m/z: [M+Na]<sup>+</sup> calculated for C<sub>10</sub>H<sub>10</sub>FNNaOS 234.0359, found 234.0362.

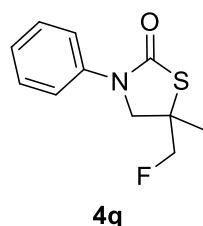

**5-(fluoromethyl)-5-methyl-3-phenylthiazolidin-2-one (4q):** The general procedure from (2-methylallyl)(phenyl)carbamothioic fluoride **2q** (41.9 mg, 0.2 mmol), PhI(OPiv)<sub>2</sub> (162.5 mg, 0.4 mmol), Et<sub>3</sub>N·3HF (96.7 mg, 0.6 mmol) and PhMe (3 mL) at room temperature for 4 h, the residue was purified by column chromatography on silica gel using petroleum ether: ethyl acetate = 5:1 to give **4q** as white solid (17.5 mg, 39% yield). Mp: 124.9-131.4 °C. <sup>1</sup>H NMR (600 MHz, CDCl<sub>3</sub>) δ 7.39 (m, 4H), 7.25 – 7.18 (m, 1H), 4.59 (dd,

$J = 48.1, 9.3$  Hz, 1H), 4.36 (dd,  $J = 47.1, 9.1$  Hz, 1H), 4.07 (d,  $J = 10.4$  Hz, 1H), 3.90 (d,  $J = 10.4$  Hz, 1H), 1.66 (d,  $J = 1.4$  Hz, 3H).  $^{13}\text{C}$  NMR (151 MHz,  $\text{CDCl}_3$ )  $\delta$  169.28, 138.70, 129.12, 125.85, 122.12, 85.60 (d,  $J = 184.2$  Hz), 57.80 (d,  $J = 2.9$  Hz), 48.56 (d,  $J = 19.8$  Hz), 21.94 (d,  $J = 2.8$  Hz).  $^{19}\text{F}$  NMR (565 MHz,  $\text{CDCl}_3$ )  $\delta$  -210.89. HRMS (ESI-TOF)  $m/z$ :  $[\text{M}+\text{Na}]^+$  calculated for  $\text{C}_{11}\text{H}_{12}\text{FNNaOS}$  248.0516, found 248.0519.

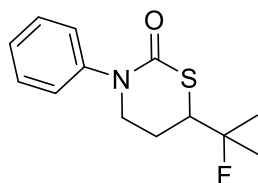

**4r**

**6-(2-fluoropropan-2-yl)-3-phenyl-1,3-thiazinan-2-one (4r):** The general procedure from (4-methylpent-3-en-1-yl)(phenyl)carbamothioic fluoride **2r** (47.5 mg, 0.2 mmol),  $\text{PhI}(\text{OPiv})_2$  (162.5 mg, 0.4 mmol),  $\text{Et}_3\text{N}\cdot 3\text{HF}$  (96.7 mg, 0.6 mmol) and  $\text{PhMe}$  (3 mL) at room temperature for 4 h, the residue was purified by column chromatography on silica gel using petroleum ether: ethyl acetate = 5:1 to give **4r** as white solid (33.4 mg, 70% yield). Mp: 95.1-97.2 °C.  $^1\text{H}$  NMR (500 MHz,  $\text{CDCl}_3$ )  $\delta$  7.31 (t,  $J = 7.7$  Hz, 2H), 7.25 – 7.09 (m, 3H), 3.86 – 3.63 (m, 3H), 2.33 (m, 1H), 2.03 (m, 1H), 1.42 (dd,  $J = 21.6, 13.4$  Hz, 6H).  $^{13}\text{C}$  NMR (151 MHz,  $\text{CDCl}_3$ )  $\delta$  165.2, 143.0, 129.2, 127.0, 125.8, 95.8 (d,  $J = 172.0$  Hz), 52.8 (d,  $J = 25.0$  Hz), 51.1, 26.2 (d,  $J = 4.4$  Hz), 24.6 (d,  $J = 24.3$  Hz), 23.2 (d,  $J = 24.3$  Hz).  $^{19}\text{F}$  NMR (565 MHz,  $\text{CDCl}_3$ )  $\delta$  -138.79. HRMS (ESI-TOF)  $m/z$ :  $[\text{M}+\text{Na}]^+$  calculated for  $\text{C}_{13}\text{H}_{16}\text{FNNaOS}$  276.0829, found 276.0828.

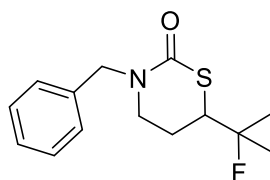

**4s**

**3-benzyl-6-(2-fluoropropan-2-yl)-1,3-thiazinan-2-one (4s):** The general procedure from benzyl(4-methylpent-3-en-1-yl)carbamothioic fluoride **2s** (50.3 mg, 0.2 mmol),  $\text{PhI}(\text{OPiv})_2$  (162.5 mg, 0.4 mmol),  $\text{Et}_3\text{N}\cdot 3\text{HF}$  (96.7 mg, 0.6 mmol) and  $\text{PhMe}$  (3 mL) at room temperature for 4 h, the residue was purified by column chromatography on silica gel using petroleum ether: ethyl acetate = 10:1 to give **4s** as yellow liquid (27.9 mg, 52% yield).  $^1\text{H}$  NMR (500 MHz,  $\text{CDCl}_3$ )  $\delta$  7.34 – 7.13 (m, 5H), 4.66 (d,  $J = 14.8$  Hz, 1H), 4.50 (d,  $J = 14.8$  Hz, 1H), 3.57 (m, 1H), 3.36 – 3.17 (m, 2H), 2.16 (m, 1H), 1.78 (m, 1H), 1.36 (dd,  $J = 21.7, 9.5$  Hz, 6H).  $^{13}\text{C}$  NMR (126 MHz,  $\text{CDCl}_3$ )  $\delta$  165.2, 136.3, 128.7, 128.1, 127.7, 95.7 (d,  $J = 172.1$  Hz), 52.5 (d,  $J = 25.3$  Hz), 51.9,

46.9, 25.7 (d, J = 4.4 Hz), 24.7 (d, J = 24.1 Hz), 23.1 (d, J = 24.3 Hz). <sup>19</sup>F NMR (471 MHz, CDCl<sub>3</sub>) δ -138.74. HRMS (ESI-TOF) m/z: [M+Na]<sup>+</sup> calculated for C<sub>14</sub>H<sub>18</sub>FNNaOS 290.0985, found 290.0978.

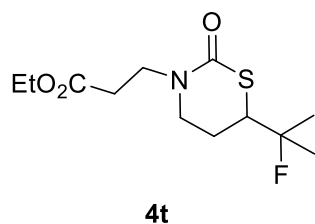

**ethyl 3-(6-(2-fluoropropan-2-yl)-2-oxo-1,3-thiazinan-3-yl)propanoate (4t):** The general procedure from ethyl 3-((fluorocarbonothioyl)(4-methylpent-3-en-1-yl)amino)propanoate **2t** (52.3 mg, 0.2 mmol), PhI(OPiv)<sub>2</sub> (162.5 mg, 0.4 mmol), Et<sub>3</sub>N·3HF (96.7 mg, 0.6 mmol) and PhMe (3 mL) at room temperature for 4 h, the residue was purified by column chromatography on silica gel using petroleum ether: ethyl acetate = 10:1 to give **4t** as yellow liquid (28.2 mg, 51% yield). <sup>1</sup>H NMR (500 MHz, CDCl<sub>3</sub>) δ 4.16 (q, J = 7.1 Hz, 2H), 3.80 – 3.45 (m, 5H), 2.65 (q, J = 6.4 Hz, 2H), 2.30 (m, 1H), 1.91 (m, 1H), 1.44 (dd, J = 21.7, 12.2 Hz, 6H), 1.28 (t, J = 7.1 Hz, 3H). <sup>13</sup>C NMR (126 MHz, CDCl<sub>3</sub>) δ 171.88, 165.07, 95.72 (d, J = 172.0 Hz), 60.74, 52.50 (d, J = 25.2 Hz), 48.96, 45.99, 32.90, 25.96 (d, J = 4.3 Hz), 24.58 (d, J = 24.1 Hz), 23.12 (d, J = 24.3 Hz), 14.14. <sup>19</sup>F NMR (471 MHz, CDCl<sub>3</sub>) δ -138.68. HRMS (ESI-TOF) m/z: [M+Na]<sup>+</sup> calculated for C<sub>12</sub>H<sub>20</sub>FNNaO<sub>3</sub>S 300.1040, found 300.1033.

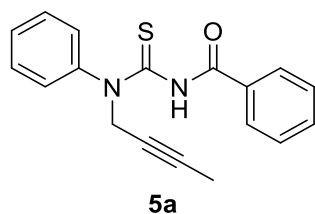

**N-(but-2-yn-1-yl(phenyl)carbamothioyl)benzamide (5a):** The general procedure from *N*-(but-2-yn-1-yl)aniline (1036.4 mg, 5 mmol), benzoyl isothiocyanate (816.0 mg, 5 mmol) and THF (50 mL) at room temperature for 2 h, the residue was purified by column chromatography on silica gel using petroleum ether: ethyl acetate = 5:1 to give **5a** as white solid (1249.3 mg, 81% yield). <sup>1</sup>H NMR (500 MHz, CDCl<sub>3</sub>) δ 8.37 (s, 1H), 7.43 (m, 10H), 5.00 (s, 2H), 1.81 (s, 3H). <sup>13</sup>C NMR (126 MHz, CDCl<sub>3</sub>) δ 179.6, 162.9, 142.6, 133.0, 132.6, 129.5, 128.7, 128.5, 127.4, 126.5, 81.5, 72.3, 46.6, 3.6. HRMS (ESI-TOF) m/z: [M+Na]<sup>+</sup> calculated for C<sub>18</sub>H<sub>16</sub>N<sub>2</sub>NaOS 331.0876, found 331.0670. HRMS (ESI-TOF) m/z: [M+Na]<sup>+</sup> calculated for C<sub>18</sub>H<sub>16</sub>N<sub>2</sub>NaOS 331.0876, found 331.0670.

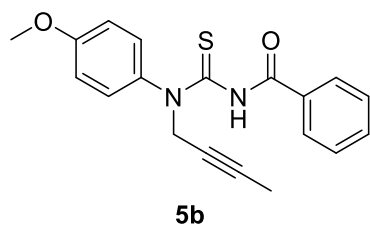

***N*-(but-2-yn-1-yl)(4-methoxyphenyl)carbamothioylbenzamide (5b):** The general procedure from *N*-(but-2-yn-1-yl)-4-methoxyaniline (876.2 mg, 5 mmol), benzoyl isothiocyanate (816.0 mg, 5 mmol) and THF (50 mL) at room temperature for 2 h, the residue was purified by column chromatography on silica gel using petroleum ether: ethyl acetate = 3:1 to give **5b** as white solid (1397.0 mg, 70% yield). <sup>1</sup>H NMR (500 MHz, CDCl<sub>3</sub>) δ 8.34 (s, 1H), 7.61 – 7.28 (m, 7H), 6.93 (d, *J* = 8.9 Hz, 2H), 4.97 (s, 2H), 3.79 (s, 3H), 1.80 (t, *J* = 2.4 Hz, 3H). <sup>13</sup>C NMR (126 MHz, CDCl<sub>3</sub>) δ 179.5, 159.3, 134.7, 133.2, 132.6, 128.7, 127.8, 127.4, 114.7, 72.5, 55.4, 46.6, 3.6. HRMS (ESI-TOF) *m/z*: [M+Na]<sup>+</sup> calculated for C<sub>19</sub>H<sub>18</sub>N<sub>2</sub>NaO<sub>2</sub>S 361.0981, found 361.0973. HRMS (ESI-TOF) *m/z*: [M+Na]<sup>+</sup> calculated for C<sub>19</sub>H<sub>18</sub>N<sub>2</sub>NaO<sub>2</sub>S 361.0981, found 361.0973.

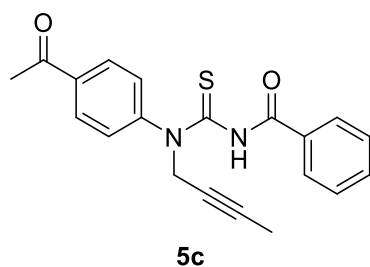

***N*-(4-acetylphenyl)(but-2-yn-1-yl)carbamothioylbenzamide (5c):** The general procedure from 1-(4-(but-2-yn-1-ylamino)phenyl)ethan-1-one (505.5 mg, 2.7 mmol), benzoyl isothiocyanate (440.6 mg, 2.7 mmol) and THF (27 mL) at room temperature for 2 h, the residue was purified by column chromatography on silica gel using petroleum ether: ethyl acetate = 3:1 to give **5c** as yellow solid (1397.0 mg, 70% yield). The product was very unstable; therefore, we didn't get pure **5c**. The product was immediately put into the next step. <sup>1</sup>H NMR (500 MHz, CDCl<sub>3</sub>) δ 8.70 (s, 1H), 8.02 – 7.88 (m, 2H), 7.64 – 7.43 (m, 5H), 7.34 (t, *J* = 7.8 Hz, 2H), 5.00 (q, *J* = 2.4 Hz, 2H), 2.53 (s, 3H), 1.78 (t, *J* = 2.4 Hz, 3H). HRMS (ESI-TOF) *m/z*: [M+Na]<sup>+</sup> calculated for C<sub>20</sub>H<sub>18</sub>N<sub>2</sub>NaO<sub>2</sub>S 373.0981, found 373.0985.

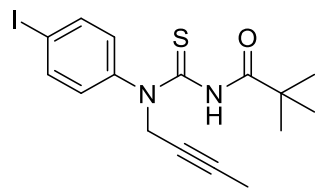

**5d**

***N*-(but-2-yn-1-yl)(4-iodophenyl)carbamothioylpivalamide (5d):** The general procedure from *N*-(but-2-yn-1-yl)-4-iodoaniline (964.6 mg, 8 mmol), pivaloyl chloride (2168.8 mg, 8 mmol), KSCN (1554.9 mg, 18 mmol) and acetone (8 mL) at room temperature for 5 h, the residue was washed with petroleum ether without additional purification to give **5d** as white solid (2.9412 g, 89% yield). The product contained a small amount of impurities, which was directly put into the next reaction. <sup>1</sup>H NMR (500 MHz, CDCl<sub>3</sub>) δ 7.83 (s, 1H), 7.74 (d, J = 8.5 Hz, 2H), 7.07 (d, J = 8.5 Hz, 2H), 4.89 (s, 2H), 1.79 (t, J = 2.4 Hz, 3H), 0.97 (s, 9H). <sup>13</sup>C NMR (126 MHz, CDCl<sub>3</sub>) δ 180.8, 173.1, 142.8, 138.1, 137.6, 128.5, 125.7, 93.2, 72.0, 47.0, 39.6, 26.7, 3.6. HRMS (ESI-TOF) m/z: [M+Na]<sup>+</sup> calculated for C<sub>16</sub>H<sub>19</sub>N<sub>2</sub>NaOS 437.0155, found 437.0160.

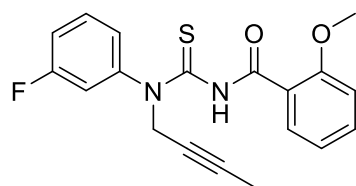

**5e**

***N*-(but-2-yn-1-yl)(3-fluorophenyl)carbamothioyl-2-methoxybenzamide (5e):** The general procedure from *N*-(but-2-yn-1-yl)-3-fluoroaniline (887.1 mg, 5.2 mmol), 2-methoxybenzoyl chloride (848.6 mg, 5.2 mmol), KSCN (1010.7 mg, 10.4 mmol) and acetone (8 mL) at room temperature for 5 h, the residue was purified by column chromatography on silica gel using petroleum ether: ethyl acetate = 3:1 to give **5e** as white solid (1241.1 g, 67% yield). Isomerism is unobvious in the <sup>1</sup>H NMR spectrum, but it is obvious in the <sup>13</sup>C NMR spectrum. <sup>1</sup>H NMR (500 MHz, CDCl<sub>3</sub>) δ 10.25 (s, 1H), 8.01 (dd, J = 8.0, 1.9 Hz, 1H), 7.49 – 7.38 (m, 2H), 7.22 – 7.12 (m, 2H), 7.08 (td, J = 8.3, 2.5 Hz, 1H), 7.02 (t, J = 7.6 Hz, 1H), 6.87 (d, J = 8.4 Hz, 1H), 4.97 (q, J = 2.5 Hz, 2H), 3.68 (s, 3H), 1.79 (t, J = 2.5 Hz, 3H). <sup>13</sup>C NMR (126 MHz, CDCl<sub>3</sub>) δ 179.3, 176.1, 167.3, 163.6, 161.6, 161.3, 159.6, 156.9, 144.2 (d, J = 9.4 Hz), 141.2 (d, J = 10.5 Hz), 134.0, 132.9, 132.8, 132.4, 130.6 (d, J = 9.1 Hz), 129.7 (d, J = 9.1 Hz), 129.0, 125.7, 122.7 (d, J = 3.2 Hz), 121.6, 120.4, 119.8, 118.8 (d, J = 3.1 Hz), 117.2, 115.3 (d, J = 20.9 Hz), 114.4 (d, J = 23.0 Hz), 113.0 (d, J = 21.3 Hz), 112.0, 111.8 (d, J = 4.2 Hz), 111.4, 81.5, 72.4, 55.9, 55.7, 46.0,

15.4, 3.6. HRMS (ESI-TOF) m/z: [M+Na]<sup>+</sup> calculated for C<sub>19</sub>H<sub>17</sub>FN<sub>2</sub>NaO<sub>2</sub>S 379.0887, found 379.0892.

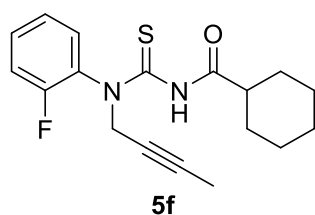

***N*-(but-2-yn-1-yl)(2-fluorophenyl)carbamothioyl)cyclohexanecarboxamide (5f)**: The general procedure from *N*-(but-2-yn-1-yl)-2-fluoroaniline (1387.2 mg, 8.5 mmol), cyclohexanecarbonyl chloride (1246.2 mg, 8.5 mmol), KSCN (1652.1 mg, 17 mmol) and acetone (8.5 mL) at room temperature for 5 h, the residue was purified by column chromatography on silica gel using petroleum ether: ethyl acetate = 3:1 to give **5f** as white solid (1.72 g, 61% yield). <sup>1</sup>H NMR (500 MHz, CDCl<sub>3</sub>) δ 8.11 (s, 1H), 7.42 – 7.28 (m, 2H), 7.23 – 7.07 (m, 2H), 5.12 (s, 1H), 4.88 – 4.53 (m, 1H), 2.18 (d, J = 12.0 Hz, 1H), 1.75 (q, J = 2.4 Hz, 3H), 1.70 – 1.43 (m, 5H), 1.11 (m, 5H). <sup>13</sup>C NMR (126 MHz, CDCl<sub>3</sub>) δ 181.7, 171.9, 156.5 (d, J = 251.9 Hz), 130.2, 129.9 (d, J = 7.9 Hz), 128.8, 124.2, 124.2, 116.5 (d, J = 19.9 Hz), 81.5, 71.8, 46.1, 45.1, 28.7, 28.6, 25.4, 25.1, 3.5. HRMS (ESI-TOF) m/z: [M+Na]<sup>+</sup> calculated for C<sub>18</sub>H<sub>21</sub>FN<sub>2</sub>NaOS 355.1251, found 355.1251.

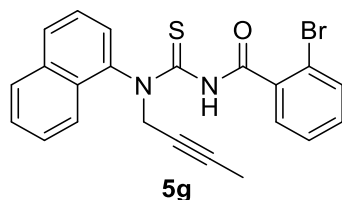

**2-bromo-*N*-(but-2-yn-1-yl)(naphthalen-1-yl)carbamothioyl)benzamide (5g)**: The general procedure from *N*-(but-2-yn-1-yl)naphthalen-1-amine (976.4 mg, 5 mmol), 2-bromobenzoyl chloride (1097.3 mg, 5 mmol), KSCN (971.8 mg, 10 mmol) and acetone (5 mL) at room temperature for 5 h, the residue was purified by column chromatography on silica gel using petroleum ether: ethyl acetate = 5:1 to give **5g** as white solid (1.5092 g, 69% yield). The product contained a small amount of impurities, which was directly put into the next reaction. <sup>1</sup>H NMR (600 MHz, CDCl<sub>3</sub>) δ 8.14 (s, 1H), 8.02 – 7.93 (m, 2H), 7.88 (d, J = 8.2 Hz, 1H), 7.68 – 7.56 (m, 4H), 7.38 (dd, J = 7.8, 1.3 Hz, 1H), 7.25 – 7.16 (m, 2H), 7.14 (dd, J = 7.5, 1.9 Hz, 1H), 5.40 (dt, J = 16.9, 2.4 Hz, 1H), 4.79 (dt, J = 16.9, 2.4 Hz, 1H), 1.73 (t, J = 2.4 Hz, 3H). <sup>13</sup>C NMR (126 MHz, CDCl<sub>3</sub>) δ 178.4, 165.5, 137.1, 136.41 134.7, 133.1, 131.6, 130.1, 129.8, 129.4, 128.6, 127.9, 127.3, 127.1, 126.0, 125.7, 122.4, 118.7, 81.9,

72.4, 45.7, 3.5. . HRMS (ESI-TOF) m/z: [M+Na]<sup>+</sup> calculated for C<sub>22</sub>H<sub>17</sub>BrN<sub>2</sub>NaOS 459.0137, found 459.0140.

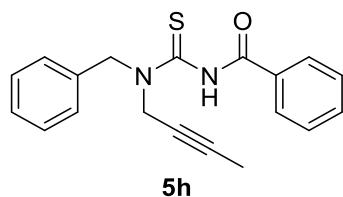

**N-(benzyl(but-2-yn-1-yl)carbamothioyl)benzamide (5h):** The general procedure from *N*-benzylbut-2-yn-1-amine (640.1 mg, 4 mmol), benzoyl isothiocyanate (656.1 mg, 4 mmol) and THF (40 mL) at room temperature for 2 h, the residue was purified by column chromatography on silica gel using petroleum ether: ethyl acetate = 5:1 to give **5h** as purple liquid (1097.3 mg, 81% yield). The product contained a small amount of impurities, which was directly put into the next reaction. <sup>1</sup>H NMR (500 MHz, CDCl<sub>3</sub>) δ 8.58 (s, 1H), 7.79 (d, J = 63.9 Hz, 2H), 7.62 – 7.08 (m, 8H), 5.46 (s, 1H), 5.20 – 4.54 (m, 2H), 4.22 (d, J = 17.0 Hz, 1H), 1.84 (s, 3H). <sup>13</sup>C NMR (126 MHz, CDCl<sub>3</sub>) δ 180.9, 163.7, 133.0, 132.5, 128.8, 128.7, 128.0, 127.8, 71.9, 56.1, 42.2, 3.6. HRMS (ESI-TOF) m/z: [M+Na]<sup>+</sup> calculated for C<sub>19</sub>H<sub>18</sub>N<sub>2</sub>NaOS 345.1032, found 345.1032.

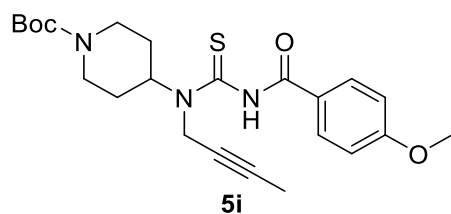

**tert-butyl 4-(1-(but-2-yn-1-yl)-3-(4-methoxybenzoyl)thioureido)piperidine-1-carboxylate (5i):** The general procedure from tert-butyl 4-(but-2-yn-1-ylamino)piperidine-1-carboxylate (1261.8 mg, 5 mmol), 4-methoxybenzoyl chloride (938.2 mg, 5 mmol), KSCN (971.8 mg, 10 mmol) and acetone (5 mL) at room temperature for 5 h, the residue was purified by column chromatography on silica gel using petroleum ether: ethyl acetate = 3:1 to give **5i** as white solid (1.9237 g, 86% yield). The product are easy to isomerize, therefore, there are more peaks in the <sup>1</sup>H NMR and <sup>13</sup>C NMR spectrum. <sup>1</sup>H NMR (500 MHz, CDCl<sub>3</sub>) δ 8.61 (s, 1H), 7.82 (d, J = 8.4 Hz, 2H), 6.96 (d, J = 8.5 Hz, 2H), 5.22 (s, 1H), 4.66 – 4.00 (m, 4H), 3.87 (s, 3H), 2.81 (s, 2H), 2.03 (d, J = 12.2 Hz, 2H), 1.82 (s, 5H), 1.47 (s, 9H), 1.25 (s, 1H). <sup>13</sup>C NMR (126 MHz, CDCl<sub>3</sub>) δ 180.8, 163.3, 154.5, 129.9, 125.0, 114.0, 79.7, 73.2, 61.1, 55.5, 37.4, 28.8, 28.3, 3.6. HRMS (ESI-TOF) m/z: [M+Na]<sup>+</sup> calculated for C<sub>23</sub>H<sub>31</sub>N<sub>3</sub>NaO<sub>4</sub>S 468.1927, found 468.1931.



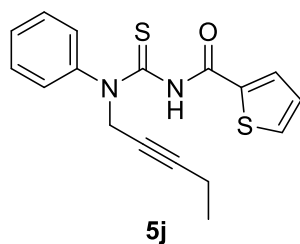

***N*-(pent-2-yn-1-yl)(phenyl)carbamothioylthiophene-2-carboxamide (5j):** The general procedure from *N*-(pent-2-yn-1-yl)aniline (1242.0 mg, 7.8 mmol), thiophene-2-carbonyl chloride (1143.5 mg, 7.8 mmol), KSCN (971.8 mg, 15.6 mmol) and acetone (7.8 mL) at room temperature for 5 h, the residue was purified by column chromatography on silica gel using petroleum ether: ethyl acetate = 5:1 to give **5j** as white solid (1804.3 mg, 70% yield). <sup>1</sup>H NMR (500 MHz, CDCl<sub>3</sub>) δ 8.32 (s, 1H), 7.55 – 7.31 (m, 6H), 7.20 (d, J = 5.6 Hz, 1H), 6.98 (t, J = 4.4 Hz, 1H), 4.99 (s, 2H), 2.25 – 2.08 (m, 2H), 1.06 (t, J = 7.5 Hz, 3H). <sup>13</sup>C NMR (126 MHz, CDCl<sub>3</sub>) δ 178.5, 178.4, 157.1, 142.1, 137.5, 132.3, 129.7, 129.6, 128.7, 127.9, 126.8, 87.6, 72.5, 46.1, 13.6, 12.4. HRMS (ESI-TOF) m/z: [M+Na]<sup>+</sup> calculated for C<sub>17</sub>H<sub>16</sub>N<sub>2</sub>NaOS<sub>2</sub> 351.0596, found 351.0600.

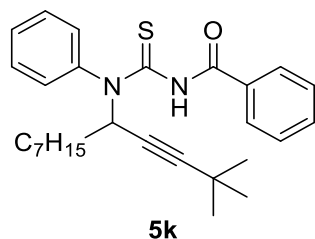

***N*-((2,2-dimethyldodec-3-yn-5-yl)(phenyl)carbamothioyl)benzamide (5k):** The general procedure from *N*-(2,2-dimethyldodec-3-yn-5-yl)aniline (1541.6 mg, 5.4 mmol), benzoyl isothiocyanate (881.3 mg, 5.4 mmol) and THF (54 mL) at room temperature for 2 h, the residue was purified by column chromatography on silica gel using petroleum ether: ethyl acetate = 10:1 to give **5k** as brown liquid (1.042 mg, 43% yield). The product contained a small amount of impurities, which was directly put into the next reaction. <sup>1</sup>H NMR (500 MHz, CDCl<sub>3</sub>) δ 8.21 (s, 1H), 7.58 – 7.18 (m, 10H), 6.45 (s, 1H), 1.97 – 1.90 (m, 1H), 1.63 – 1.40 (m, 4H), 1.40 – 1.25 (m, 11H), 1.09 (s, 9H), 0.88 (t, J = 6.7 Hz, 5H). HRMS (ESI-TOF) m/z: [M+Na]<sup>+</sup> calculated for C<sub>28</sub>H<sub>36</sub>N<sub>2</sub>NaOS 471.2441, found 471.2452.

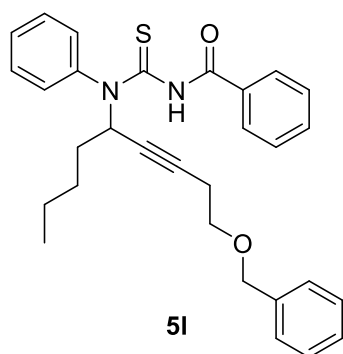

***N*-((8-(benzyloxy)oct-5-yn-4-yl)(phenyl)carbamothioyl)benzamide (5I):** The general procedure from *N*-(8-(benzyloxy)oct-5-yn-4-yl)aniline (3043.7 mg, 9.9 mmol), benzoyl isothiocyanate (1615.7 mg, 9.9 mmol) and THF (54 mL) at room temperature for 2 h, the residue was purified by column chromatography on silica gel using petroleum ether: ethyl acetate = 10:1 to give **5I** as brown liquid (2.4688 g, 53% yield). The product contained a small amount of impurities, which was directly put into the next reaction. <sup>1</sup>H NMR (600 MHz, CDCl<sub>3</sub>) δ 8.18 (s, 1H), 8.08 (dt, *J* = 8.4, 1.7 Hz, 1H), 7.49 – 7.29 (m, 14H), 6.56 (s, 1H), 4.54 (s, 2H), 3.52 (t, *J* = 7.0 Hz, 2H), 2.48 (td, *J* = 7.2, 3.9 Hz, 2H), 1.85 (d, *J* = 6.5 Hz, 1H), 1.63 – 1.46 (m, 3H), 0.99 (t, *J* = 7.1 Hz, 3H). HRMS (ESI-TOF) *m/z*: [M+Na]<sup>+</sup> calculated for C<sub>29</sub>H<sub>30</sub>FN<sub>2</sub>NaO<sub>2</sub>S 493.1920, found 493.1923.

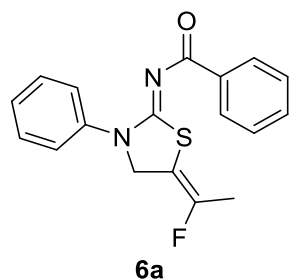

***N*-((2Z,5E)-5-(1-fluoroethylidene)-3-phenylthiazolidin-2-ylidene)benzamide (6a):** The general procedure from *N*-(but-2-yn-1-yl)(phenyl)carbamothioyl)benzamide **5a** (61.7 mg, 0.2 mmol), PhI(OPiv)<sub>2</sub> (85.3 mg, 0.21 mmol), Et<sub>3</sub>N·3HF (117 mg, 0.7 mmol) and dioxane (3 mL) at room temperature for 3 h, the residue was purified by column chromatography on silica gel using petroleum ether: ethyl acetate = 10:1 to give **6a** as white solid (53.6 mg, 82% yield). <sup>1</sup>H NMR (500 MHz, CDCl<sub>3</sub>) δ 8.12 – 7.99 (m, 2H), 7.49 (d, *J* = 7.6 Hz, 2H), 7.41 (dt, *J* = 13.5, 7.5 Hz, 3H), 7.28 (q, *J* = 7.9 Hz, 3H), 4.74 (m, 2H), 1.99 (dt, *J* = 17.0, 2.3 Hz, 3H). <sup>13</sup>C NMR (126 MHz, CDCl<sub>3</sub>) δ 176.0, 167.9, 148.1 (d, *J* = 252.8 Hz), 139.8, 135.9, 132.3, 129.8, 129.1, 128.1, 127.1, 124.8, 108.1 (d, *J* = 25.9 Hz), 52.0 (d, *J* = 6.4 Hz), 16.3 (d, *J* = 27.5 Hz). <sup>19</sup>F NMR (471 MHz, CDCl<sub>3</sub>) δ -92.00. HRMS (ESI-TOF) *m/z*: [M+Na]<sup>+</sup> calculated for C<sub>18</sub>H<sub>15</sub>FN<sub>2</sub>NaOS 349.0781, found 349.0779.

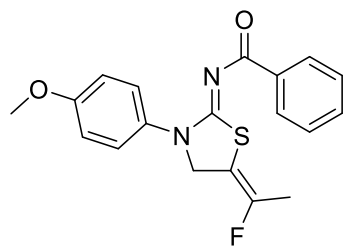

**6b**

***N*-((2Z,5E)-5-(1-fluoroethylidene)-3-(4-methoxyphenyl)thiazolidin-2-ylidene)benzamide (6b):** The general procedure from *N*-(but-2-yn-1-yl(4-methoxyphenyl)carbamothioyl)benzamide **5b** (67.7 mg, 0.2 mmol),  $\text{PhI}(\text{OPiv})_2$  (85.3 mg, 0.21 mmol),  $\text{Et}_3\text{N}\cdot 3\text{HF}$  (117 mg, 0.7 mmol) and dioxane (3 mL) at room temperature for 3 h, the residue was purified by column chromatography on silica gel using petroleum ether: ethyl acetate = 10:1 to give **6b** as white solid (52.6 mg, 74% yield).  $^1\text{H}$  NMR (500 MHz,  $\text{CDCl}_3$ )  $\delta$  8.10 (dd,  $J = 8.3, 1.4$  Hz, 2H), 7.51 – 7.40 (m, 3H), 7.36 (t,  $J = 7.7$  Hz, 2H), 6.99 (d,  $J = 9.0$  Hz, 2H), 4.73 (dq,  $J = 4.5, 2.4$  Hz, 2H), 3.86 (s, 3H), 2.04 (dt,  $J = 17.0, 2.3$  Hz, 3H).  $^{13}\text{C}$  NMR (126 MHz,  $\text{CDCl}_3$ )  $\delta$  175.9, 167.8, 158.3, 147.9 (d,  $J = 252.7$  Hz), 136.0, 132.6, 132.1, 129.7, 128.0, 126.2, 114.1, 108.2 (d,  $J = 26.0$  Hz), 55.5, 52.2 (d,  $J = 6.3$  Hz), 16.3 (d,  $J = 27.6$  Hz).  $^{19}\text{F}$  NMR (471 MHz,  $\text{CDCl}_3$ )  $\delta$  -92.15. HRMS (ESI-TOF)  $m/z$ :  $[\text{M}+\text{Na}]^+$  calculated for  $\text{C}_{19}\text{H}_{17}\text{FN}_2\text{NaO}_2\text{S}$  379.0887, found 379.0885.

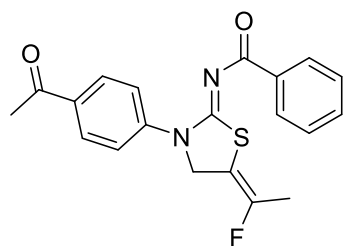

**6c**

***N*-((2Z,5E)-3-(4-acetylphenyl)-5-(1-fluoroethylidene)thiazolidin-2-ylidene)benzamide (6c):** The general procedure from *N*-((4-acetylphenyl)(but-2-yn-1-yl)carbamothioyl)benzamide **5c** (70.1 mg, 0.2 mmol),  $\text{PhI}(\text{OPiv})_2$  (85.3 mg, 0.21 mmol),  $\text{Et}_3\text{N}\cdot 3\text{HF}$  (117 mg, 0.7 mmol) and dioxane (3 mL) at room temperature for 3 h, the residue was purified by column chromatography on silica gel using petroleum ether: ethyl acetate = 5:1 to give **6c** as white solid (58.1 mg, 79% yield).  $^1\text{H}$  NMR (500 MHz,  $\text{CDCl}_3$ )  $\delta$  8.20 – 8.03 (m, 4H), 7.78 (d,  $J = 8.6$  Hz, 2H), 7.51 (t,  $J = 7.4$  Hz, 1H), 7.41 (t,  $J = 7.6$  Hz, 2H), 4.86 (t,  $J = 2.7$  Hz, 2H), 2.66 (s, 3H), 2.08 (dt,  $J = 17.0, 2.3$  Hz, 3H).  $^{13}\text{C}$  NMR (151 MHz,  $\text{CDCl}_3$ )  $\delta$  196.9, 176.1, 167.9, 148.5 (d,  $J = 253.8$  Hz), 143.7, 135.6, 134.8, 132.6, 129.8, 129.2, 128.3, 123.8, 107.5 (d,  $J = 26.1$  Hz), 51.3 (d,  $J = 6.6$  Hz), 26.6, 16.3 (d,  $J = 27.5$  Hz).  $^{19}\text{F}$  NMR (471 MHz,  $\text{CDCl}_3$ )  $\delta$  -92.16. HRMS (ESI-TOF)  $m/z$ :  $[\text{M}+\text{Na}]^+$  calculated for  $\text{C}_{20}\text{H}_{17}\text{FN}_2\text{NaO}_2\text{S}$  391.0887,

found 391.0894.

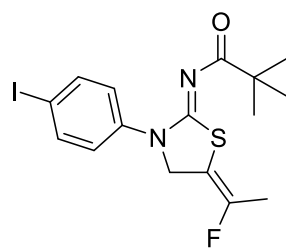

**6d**

***N*-((2Z,5E)-5-(1-fluoroethylidene)-3-(4-iodophenyl)thiazolidin-2-ylidene)pivalamide (6d):** The general procedure from *N*-(but-2-yn-1-yl(4-iodophenyl)carbamothioyl)pivalamide **5d** (82.7 mg, 0.2 mmol), PhI(OPiv)<sub>2</sub> (85.3 mg, 0.21 mmol), Et<sub>3</sub>N·3HF (117 mg, 0.7 mmol) and dioxane (3 mL) at room temperature for 3 h, the residue was purified by column chromatography on silica gel using petroleum ether: ethyl acetate = 10:1 to give **6d** as white solid (44.9 mg, 52% yield). <sup>1</sup>H NMR (500 MHz, CDCl<sub>3</sub>) δ 7.73 (d, J = 8.9 Hz, 2H), 7.43 – 7.30 (m, 2H), 4.78 – 4.61 (m, 2H), 2.02 (dt, J = 17.0, 2.2 Hz, 3H), 1.15 (s, 9H). <sup>13</sup>C NMR (126 MHz, CDCl<sub>3</sub>) δ 190.81, 166.68, 148.07 (d, J = 253.0 Hz), 139.57, 137.74, 125.71, 107.71 (d, J = 25.6 Hz), 90.65, 50.97 (d, J = 6.7 Hz), 41.22, 27.18, 16.23 (d, J = 27.5 Hz). <sup>19</sup>F NMR (471 MHz, CDCl<sub>3</sub>) δ -92.15. HRMS (ESI-TOF) *m/z*: [M+Na]<sup>+</sup> calculated for C<sub>16</sub>H<sub>18</sub>FIN<sub>2</sub>NaOS 455.0061, found 455.0070.

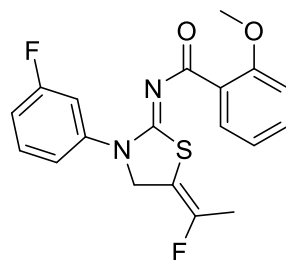

**6e**

***N*-((2Z,5E)-5-(1-fluoroethylidene)-3-(3-fluorophenyl)thiazolidin-2-ylidene)-2-methoxybenzamide (6e):** The general procedure from *N*-(but-2-yn-1-yl(3-fluorophenyl)carbamothioyl)-2-methoxybenzamide **5e** (71.3 mg, 0.2 mmol), PhI(OPiv)<sub>2</sub> (85.3 mg, 0.21 mmol), Et<sub>3</sub>N·3HF (117 mg, 0.7 mmol) and dioxane (3 mL) at room temperature for 3 h, the residue was purified by column chromatography on silica gel using petroleum ether: ethyl acetate = 5:1 to give **6e** as white solid (58.8 mg, 79% yield). <sup>1</sup>H NMR (500 MHz, CDCl<sub>3</sub>) δ 7.95 (dd, J = 7.7, 1.8 Hz, 1H), 7.66 (dt, J = 10.8, 2.3 Hz, 1H), 7.47 – 7.34 (m, 2H), 7.31 (dd, J = 8.6, 1.7 Hz, 1H), 7.04 – 6.87 (m, 3H), 4.77 (m, 2H), 3.92 (s, 3H), 2.04 (dt, J = 16.9, 2.3 Hz, 3H). <sup>13</sup>C NMR (126 MHz, CDCl<sub>3</sub>) δ 176.2, 167.1, 162.6 (d, J = 246.0 Hz), 159.8, 148.1 (d, J = 253.5 Hz), 141.2 (d, J = 10.7 Hz), 133.2, 132.5, 129.9 (d, J = 9.2 Hz), 125.3,

120.0, 118.9 (d, J = 3.0 Hz), 113.4 (d, J = 21.1 Hz), 112.1 (d, J = 25.6 Hz), 111.9, 107.9 (d, J = 25.4 Hz), 55.8, 51.5 (d, J = 6.6 Hz), 16.3 (d, J = 27.5 Hz). <sup>19</sup>F NMR (471 MHz, CDCl<sub>3</sub>) δ -91.96, -111.04. HRMS (ESI-TOF) m/z: [M+Na]<sup>+</sup> calculated for C<sub>19</sub>H<sub>16</sub>F<sub>2</sub>N<sub>2</sub>NaO<sub>2</sub>S 397.0793, found 397.0798.

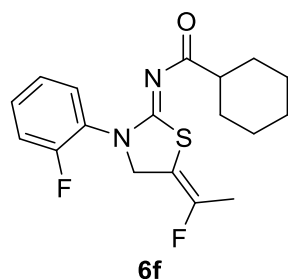

***N*-((2Z,5E)-5-(1-fluoroethylidene)-3-(2-fluorophenyl)thiazolidin-2-ylidene)cyclohexanecarboxamide (6f):**

The general procedure from *N*-(but-2-yn-1-yl(2-fluorophenyl)carbamothioyl) cyclohexanecarboxamide **5f** (66.5 mg, 0.2 mmol), PhI(OPiv)<sub>2</sub> (85.3 mg, 0.21 mmol), Et<sub>3</sub>N·3HF (117 mg, 0.7 mmol) and dioxane (3 mL) at room temperature for 3 h, the residue was purified by column chromatography on silica gel using petroleum ether: ethyl acetate = 10:1 to give **6f** as white solid (48.5 mg, 69% yield). <sup>1</sup>H NMR (500 MHz, CDCl<sub>3</sub>) δ 7.36 (m, 2H), 7.25 – 7.15 (m, 2H), 4.61 (dt, J = 4.6, 2.3 Hz, 2H), 2.26 (tt, J = 11.1, 3.6 Hz, 1H), 2.02 (dt, J = 16.9, 2.3 Hz, 3H), 1.82 (m, 2H), 1.67 (dt, J = 12.6, 3.4 Hz, 2H), 1.62 – 1.54 (m, 1H), 1.41 – 1.08 (m, 5H). <sup>13</sup>C NMR (126 MHz, CDCl<sub>3</sub>) δ 188.2, 167.7, 157.4 (d, J = 252.3 Hz), 147.8 (d, J = 252.7 Hz), 129.7 (d, J = 7.9 Hz), 128.8 (d, J = 1.8 Hz), 127.2 (d, J = 12.1 Hz), 124.5 (d, J = 3.7 Hz), 116.8 (d, J = 19.8 Hz), 108.7 (d, J = 25.9 Hz), 51.0 (d, J = 6.6 Hz), 47.5, 29.0, 26.0, 25.7, 16.3 (d, J = 27.6 Hz). <sup>19</sup>F NMR (471 MHz, CDCl<sub>3</sub>) δ -92.30, -118.77. HRMS (ESI-TOF) m/z: [M+Na]<sup>+</sup> calculated for C<sub>18</sub>H<sub>20</sub>F<sub>2</sub>N<sub>2</sub>NaOS 373.1157, found 373.1159.

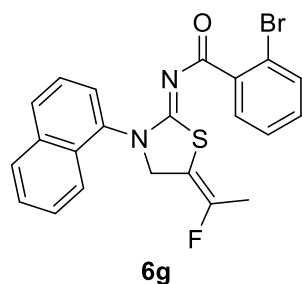

**2-bromo-*N*-((2Z,5E)-5-(1-fluoroethylidene)-3-(naphthalen-1-yl)thiazolidin-2-ylidene)benzamide (6g):** The general procedure from 2-bromo-*N*-(but-2-yn-1-yl(naphthalen-1-yl)carbamothioyl)benzamide **5g** (87.5 mg, 0.2 mmol), PhI(OPiv)<sub>2</sub> (85.3 mg, 0.21 mmol), Et<sub>3</sub>N·3HF (117 mg, 0.7 mmol) and dioxane (3 mL) at room temperature for 3 h, the residue was purified by column chromatography on silica gel using petroleum ether:

ethyl acetate = 10:1 to give **6g** as white solid (54.2 mg, 62% yield).  $^1\text{H NMR}$  (600 MHz,  $\text{CDCl}_3$ )  $\delta$  8.09 – 7.83 (m, 2H), 7.71 (dt,  $J = 6.3, 3.6$  Hz, 1H), 7.64 – 7.38 (m, 6H), 7.03 (m, 2H), 4.84 (m, 1H), 4.80 – 4.66 (m, 1H), 2.11 (dt,  $J = 16.9, 2.3$  Hz, 3H).  $^{13}\text{C NMR}$  (126 MHz,  $\text{CDCl}_3$ )  $\delta$  176.1, 169.7, 148.3 (d,  $J = 253.3$  Hz), 136.7, 136.3, 134.6, 134.1, 132.1, 131.5, 129.3, 129.1, 128.7, 127.2, 126.6, 126.6, 125.6, 125.1, 122.4, 122.0, 108.7 (d,  $J = 26.6$  Hz), 53.0 (d,  $J = 6.0$  Hz), 16.4 (d,  $J = 27.5$  Hz).  $^{19}\text{F NMR}$  (471 MHz,  $\text{CDCl}_3$ )  $\delta$  -91.16. HRMS (ESI-TOF)  $m/z$ :  $[\text{M}+\text{Na}]^+$  calculated for  $\text{C}_{22}\text{H}_{16}\text{BrFN}_2\text{NaO}_2\text{S}$  477.0043, found 477.0074.

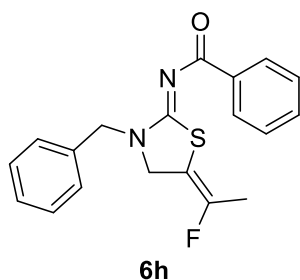

***N*-((2Z,5E)-3-benzyl-5-(1-fluoroethylidene)thiazolidin-2-ylidene)benzamide (6h)**: The general procedure from *N*-(benzyl(but-2-yn-1-yl)carbamothioyl)benzamide **5h** (64.5 mg, 0.2 mmol),  $\text{PhI}(\text{OPiv})_2$  (85.3 mg, 0.21 mmol),  $\text{Et}_3\text{N}\cdot 3\text{HF}$  (117 mg, 0.7 mmol) and dioxane (3 mL) at room temperature for 3 h, the residue was purified by column chromatography on silica gel using petroleum ether: ethyl acetate = 10:1 to give **6h** as white solid (40.9 mg, 72% yield).  $^1\text{H NMR}$  (500 MHz,  $\text{CDCl}_3$ )  $\delta$  8.37 – 8.25 (m, 2H), 7.57 – 7.47 (m, 1H), 7.43 (dd,  $J = 8.2, 6.7$  Hz, 2H), 7.40 – 7.28 (m, 5H), 5.02 (s, 2H), 4.26 (dd,  $J = 3.6, 2.3$  Hz, 2H), 1.99 (dt,  $J = 17.0, 2.3$  Hz, 3H).  $^{13}\text{C NMR}$  (126 MHz,  $\text{CDCl}_3$ )  $\delta$  175.8, 168.8, 148.0 (d,  $J = 252.3$  Hz), 136.2, 135.1, 132.1, 129.7, 129.0, 128.3, 128.2, 128.1, 108.5 (d,  $J = 26.1$  Hz), 51.2, 49.2 (d,  $J = 6.4$  Hz), 16.4 (d,  $J = 27.6$  Hz).  $^{19}\text{F NMR}$  (471 MHz,  $\text{CDCl}_3$ )  $\delta$  -92.23. HRMS (ESI-TOF)  $m/z$ :  $[\text{M}+\text{Na}]^+$  calculated for  $\text{C}_{19}\text{H}_{17}\text{FN}_2\text{NaOS}$  363.0938, found 363.0931.

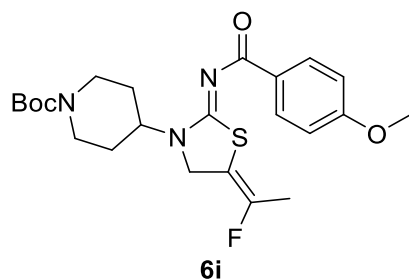

**tert-butyl 4-((2Z,5E)-5-(1-fluoroethylidene)-2-((4-methoxybenzoyl)imino)thiazolidin-3-yl)piperidine-1-carboxylate (6i)**: The general procedure from tert-butyl 4-(1-(but-2-yn-1-yl)-3-(4-methoxybenzoyl)thioureido)piperidine-1-carboxylate **5i** (89.1 mg, 0.2 mmol),  $\text{PhI}(\text{OPiv})_2$  (85.3 mg, 0.21

mmol), Et<sub>3</sub>N·3HF (117 mg, 0.7 mmol) and dioxane (3 mL) at room temperature for 3 h, the residue was purified by column chromatography on silica gel using petroleum ether: ethyl acetate = 5:1 to give **6i** as white solid (51.1 mg, 55% yield). <sup>1</sup>H NMR (500 MHz, CDCl<sub>3</sub>) δ 8.20 (d, J = 8.5 Hz, 2H), 6.93 (d, J = 8.6 Hz, 2H), 4.80 (tt, J = 12.2, 4.0 Hz, 1H), 4.33 (t, J = 2.9 Hz, 4H), 3.86 (s, 3H), 2.88 (s, 2H), 2.00 (dt, J = 17.0, 2.4 Hz, 3H), 1.95 – 1.87 (m, 2H), 1.73 (qd, J = 12.2, 4.5 Hz, 2H), 1.49 (s, 9H). <sup>13</sup>C NMR (126 MHz, CDCl<sub>3</sub>) δ 175.1, 167.5, 162.9, 154.5, 147.9 (d, J = 252.0 Hz), 131.5, 128.9, 113.3, 108.6 (d, J = 25.4 Hz), 79.9, 55.2 (d, J = 29.7 Hz), 45.8, 45.8, 43.2, 28.8, 28.4, 16.4 (d, J = 27.6 Hz). <sup>19</sup>F NMR (471 MHz, CDCl<sub>3</sub>) δ -92.56. HRMS (ESI-TOF) m/z: [M+Na]<sup>+</sup> calculated for C<sub>22</sub>H<sub>30</sub>FN<sub>3</sub>NaO<sub>4</sub>S 486.1833, found 486.1826.

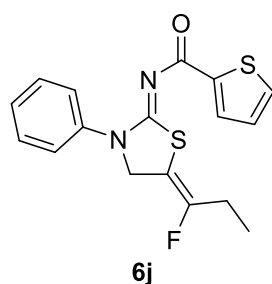

**N-((2Z,5E)-5-(1-fluoropropylidene)-3-phenylthiazolidin-2-ylidene)thiophene-2-carboxamide (6j):** The general procedure from *N*-(pent-2-yn-1-yl(phenyl)carbamothioyl)thiophene-2-carboxamide **5j** (65.7 mg, 0.2 mmol), PhI(OPiv)<sub>2</sub> (85.3 mg, 0.21 mmol), Et<sub>3</sub>N·3HF (117 mg, 0.7 mmol) and dioxane (3 mL) at room temperature for 3 h, the residue was purified by column chromatography on silica gel using petroleum ether: ethyl acetate = 10:1 to give **6j** as white solid (54.1 mg, 78% yield). <sup>1</sup>H NMR (500 MHz, CDCl<sub>3</sub>) δ 7.76 (dd, J = 3.8, 1.3 Hz, 1H), 7.67 – 7.53 (m, 2H), 7.53 – 7.42 (m, 3H), 7.32 (t, J = 7.4 Hz, 1H), 7.04 (dd, J = 5.0, 3.7 Hz, 1H), 4.80 (dt, J = 3.4, 1.7 Hz, 2H), 2.45 – 2.24 (m, 2H), 1.16 (t, J = 7.5 Hz, 3H). <sup>13</sup>C NMR (126 MHz, CDCl<sub>3</sub>) δ 170.75, 167.09, 152.45 (d, J = 256.3 Hz), 142.28, 139.51, 132.24, 132.15, 128.88, 127.86, 126.95, 124.59, 106.90 (d, J = 26.9 Hz), 51.93 (d, J = 6.5 Hz), 24.14 (d, J = 26.0 Hz), 10.14. <sup>19</sup>F NMR (471 MHz, CDCl<sub>3</sub>) δ -101.3. HRMS (ESI-TOF) m/z: [M+Na]<sup>+</sup> calculated for C<sub>17</sub>H<sub>15</sub>N<sub>2</sub>NaOS<sub>2</sub> 369.0502, found 369.0506.

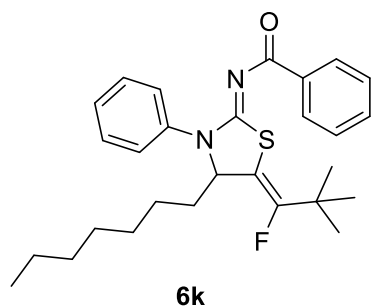

***N*-((2*Z*,5*E*)-5-(1-fluoro-2,2-dimethylpropylidene)-4-heptyl-3-phenylthiazolidin-2-ylidene)benzamide (6k):**

The general procedure from *N*-((2,2-dimethyldodec-3-yn-5-yl)(phenyl)carbamothioyl)benzamide **5k** (65.7 mg, 0.2 mmol),  $\text{PhI}(\text{OPiv})_2$  (85.3 mg, 0.21 mmol),  $\text{Et}_3\text{N}\cdot 3\text{HF}$  (117 mg, 0.7 mmol) and dioxane (3 mL) at room temperature for 3 h, the residue was purified by column chromatography on silica gel using petroleum ether: ethyl acetate = 30:1 to give **6k** as white solid (73.5 mg, 79% yield).  $^1\text{H}$  NMR (500 MHz,  $\text{CDCl}_3$ )  $\delta$  8.11 – 8.01 (m, 2H), 7.54 – 7.45 (m, 4H), 7.45 – 7.29 (m, 4H), 5.28 (q,  $J = 3.8$  Hz, 1H), 1.77 (m, 1H), 1.68 – 1.56 (m, 1H), 1.32 (d,  $J = 1.6$  Hz, 10H), 1.22 (dd,  $J = 24.9, 5.2$  Hz, 8H), 0.84 (t,  $J = 7.0$  Hz, 3H).  $^{13}\text{C}$  NMR (126 MHz,  $\text{CDCl}_3$ )  $\delta$  176.0, 168.0, 157.7 (d,  $J = 256.5$  Hz), 138.6, 136.2, 131.9, 129.7, 129.0, 127.9, 127.5, 126.9, 110.8 (d,  $J = 29.1$  Hz), 64.5 (d,  $J = 7.3$  Hz), 36.3 (d,  $J = 24.5$  Hz), 32.2 (d,  $J = 2.4$  Hz), 31.6, 29.3, 28.9, 27.7 (d,  $J = 3.7$  Hz), 22.8, 22.5, 14.0.  $^{19}\text{F}$  NMR (471 MHz,  $\text{CDCl}_3$ )  $\delta$  -98.55. HRMS (ESI-TOF)  $m/z$ :  $[\text{M}+\text{Na}]^+$  calculated for  $\text{C}_{28}\text{H}_{35}\text{FN}_2\text{NaOS}$  489.2346, found 489.2353.

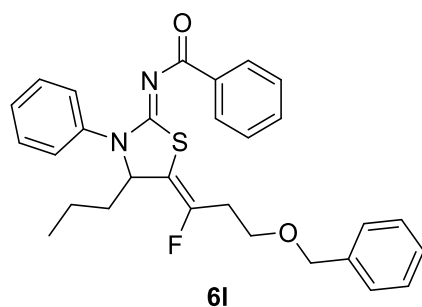

***N*-((2*Z*,5*E*)-5-(3-(benzyloxy)-1-fluoropropylidene)-3-phenyl-4-propylthiazolidin-2-ylidene)benzamide (6l):**

The general procedure from *N*-((8-(benzyloxy)oct-5-yn-4-yl)(phenyl)carbamothioyl)benzamide **5l** (97.7 mg, 0.2 mmol),  $\text{PhI}(\text{OPiv})_2$  (85.3 mg, 0.21 mmol),  $\text{Et}_3\text{N}\cdot 3\text{HF}$  (117 mg, 0.7 mmol) and dioxane (3 mL) at room temperature for 3 h, the residue was purified by column chromatography on silica gel using petroleum ether: ethyl acetate = 30:1 to give **6l** as colorless liquid (65.3 mg, 67% yield).  $^1\text{H}$  NMR (500 MHz,  $\text{CDCl}_3$ )  $\delta$  8.11 – 8.02 (m, 2H), 7.53 – 7.30 (m, 12H), 7.27 (m, 1H), 5.26 (dt,  $J = 6.1, 3.1$  Hz, 1H), 4.56 (d,  $J = 2.2$  Hz, 2H), 3.70 (t,  $J = 6.5$  Hz, 2H), 2.82 – 2.58 (m, 2H), 1.82 – 1.70 (m, 1H), 1.69 – 1.61 (m, 1H), 1.40 (m, 2H), 0.82 (t,  $J = 7.4$  Hz, 3H).  $^{13}\text{C}$  NMR (126 MHz,  $\text{CDCl}_3$ )  $\delta$  176.1, 167.6, 149.1 (d,  $J = 256.6$  Hz), 138.6, 138.0, 136.1, 132.0, 129.7, 129.1, 128.4, 128.0, 127.6, 127.6, 127.6, 126.9, 114.3 (d,  $J = 24.0$  Hz), 72.9, 65.7, 63.1 (d,  $J = 2.3$  Hz), 31.7 (d,  $J = 25.6$  Hz), 31.8, 31.6, 16.6, 13.9.  $^{19}\text{F}$  NMR (471 MHz,  $\text{CDCl}_3$ )  $\delta$  -100.46. HRMS (ESI-TOF)  $m/z$ :  $[\text{M}+\text{Na}]^+$  calculated for  $\text{C}_{29}\text{H}_{29}\text{FN}_2\text{NaO}_2\text{S}$  511.1826, found 511.1830.



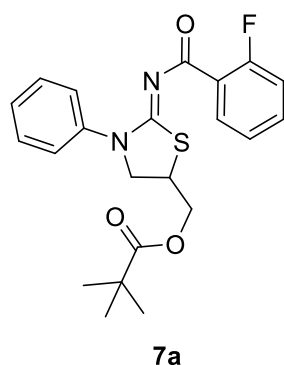

**(Z)-2-((2-fluorobenzoyl)imino)-3-phenylthiazolidin-5-yl methyl pivalate (7a):**  $^1\text{H}$  NMR (600 MHz,  $\text{CDCl}_3$ )  $\delta$  7.96 (td,  $J = 7.7, 1.9$  Hz, 1H), 7.61 – 7.51 (m, 2H), 7.47 (t,  $J = 7.9$  Hz, 2H), 7.43 – 7.37 (m, 1H), 7.31 (td,  $J = 7.3, 1.3$  Hz, 1H), 7.16 – 7.02 (m, 2H), 4.54 – 4.18 (m, 3H), 3.99 (dd,  $J = 11.0, 3.6$  Hz, 1H), 3.89 (qd,  $J = 7.2, 3.6$  Hz, 1H), 1.21 (s, 9H).  $^{13}\text{C}$  NMR (151 MHz, Chloroform- $d$ )  $\delta$  178.05, 174.18, 174.15, 169.83, 163.28, 161.56, 139.93, 133.41, 133.35, 132.49, 128.92, 126.82, 124.56, 123.49, 116.84, 116.69, 64.68, 54.26, 40.25, 38.84, 27.10.

#### Reference

[1] Liu, S.; Jiang, L. Copper-Catalyzed Multicomponent Reactions of Intramolecular and Intermolecular Thio trifluoromethylation of Alkenes: Access to  $\text{CF}_3$ -Containing 2-Iminothiazolidines and Isothioureas. *Org. Lett.* **2022**, 39, 7157-7162.

### 7. Mechanism study.

#### 7.1 Radical trapping experiment

Adding 2.0 equiv of TEMPO to the reaction system of **1b** to give **3b**

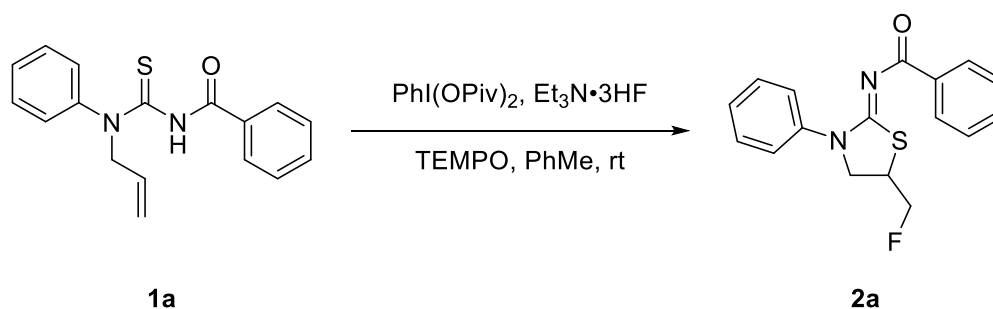

A solution of  $\text{PhI}(\text{OPiv})_2$  (0.23 mmol, 1.2 eq) and  $\text{Et}_3\text{N}\cdot 3\text{HF}$  (0.6 mmol, 3 eq) in PhMe (3 mL) was stirred at room temperature for 5 minutes, then TEMPO (0.4 mmol, 2 eq) and alkenyl thioureas **1b** (0.2 mmol, 1 eq)

was added. The mixture was stirred at the room temperature for 2 h until alkenyl thioureas **1b** was consumed. Then the reaction mixture was quenched with saturated NaHCO<sub>3</sub> solution, extracted with EA, and the combined organic phases were washed with brine, dried with anhydrous Na<sub>2</sub>SO<sub>4</sub> and filtered. The filtrate was concentrated under reduced pressure. The yield of the **1b** was 79% through <sup>1</sup>H NMR spectrum with CH<sub>2</sub>Br<sub>2</sub> as internal standard.

## 7.2 Isotope labeling experiment (H<sub>2</sub><sup>18</sup>O)

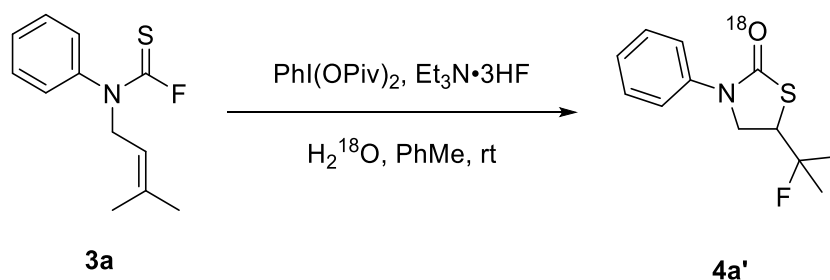

A solution of PhI(OPiv)<sub>2</sub> (162.5 mg, 0.4 mmol) and Et<sub>3</sub>N·3HF (98.2 mg, 0.6 mmol) in PhMe (3 mL) was stirred at room temperature for 5 minutes, then H<sub>2</sub><sup>18</sup>O (8 mg, 0.4 mmol) and (3-methylbut-2-en-1-yl)(phenyl)carbamothioic fluoride **3a** (44.7 mg, 0.2 mmol) was added. The mixture was stirred at the room temperature for 4 h until thiocarbamoyl fluorides **3a** was consumed. Then the reaction mixture was quenched with saturated NaHCO<sub>3</sub> solution, extracted with EA, and the combined organic phases were washed with brine, dried with anhydrous Na<sub>2</sub>SO<sub>4</sub> and filtered. The filtrate was concentrated under reduced pressure and the residue was analyzed by LC-MS.

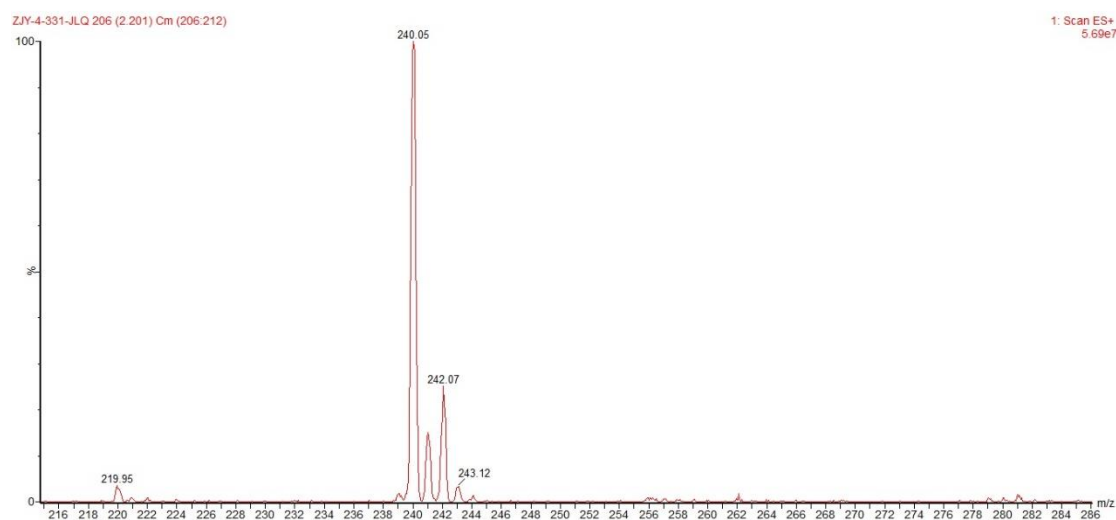

### 7.3 Chiral regulation experiment

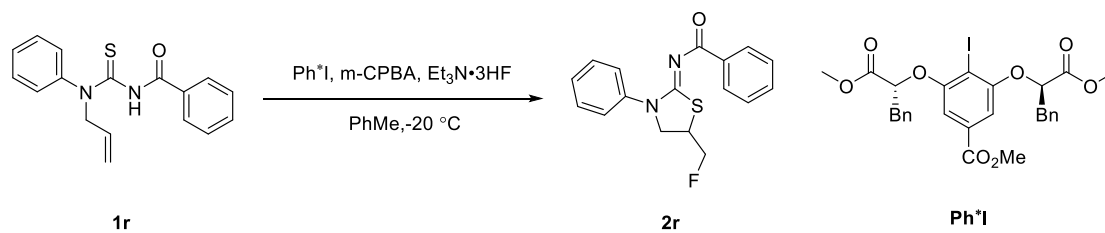

A solution of  $\text{PhI}(\text{OPiv})_2$  (0.23 mmol, 1.2 eq) and  $\text{Et}_3\text{N}\cdot 3\text{HF}$  (0.6 mmol, 3 eq) in  $\text{PhMe}$  (3 mL) was stirred at room temperature for 5 minutes, then alkenyl thioureas **1r** (0.2 mmol, 1 eq) was added. The mixture was stirred at the room temperature for 2 h until alkenyl thioureas **1r** was consumed. Then the reaction mixture was quenched with saturated  $\text{NaHCO}_3$  solution, extracted with EA, and the combined organic phases were washed with brine, dried with anhydrous  $\text{Na}_2\text{SO}_4$  and filtered. The filtrate was concentrated under reduced pressure. The yield of the **1r** was 53% by analyzing  $^1\text{H}$  NMR spectrum with  $\text{CH}_2\text{Br}_2$  as internal standard, and the residue was analyzed by HPLC, which showed the reaction is not stereoselective.

### 7.4 Experiment of disulfide as a sulfur source

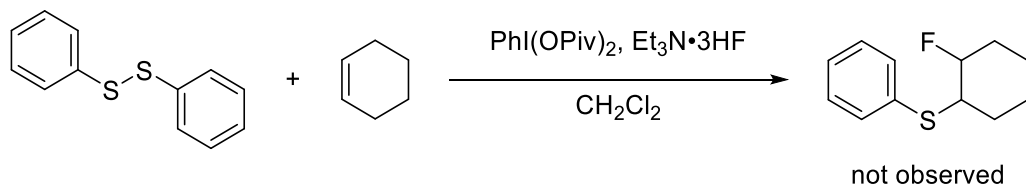

A solution of  $\text{PhI}(\text{OPiv})_2$  (0.4 mmol, 2 eq) and  $\text{Et}_3\text{N}\cdot 3\text{HF}$  (0.6 mmol, 3 eq) in  $\text{CH}_2\text{Cl}_2$  (3 mL) was stirred at room temperature for 5 minutes, then cyclohexene (0.4 mmol, 2 eq) and diphenyl disulfide (0.2 mmol, 1 eq) was added. The mixture was stirred at the room temperature for 10 h. TLC monitoring showed that a large amount of raw materials remained and few new products were produced.

### 8. The 4 mmol scale of procedures for 2a.

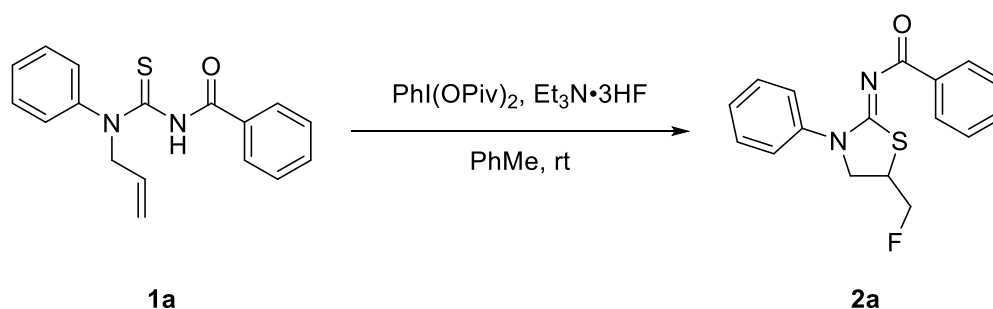

A solution of  $\text{PhI}(\text{OPiv})_2$  (1950 mg, 4.8 mmol) and  $\text{Et}_3\text{N}\cdot 3\text{HF}$  (2006.5 mg, 12 mmol) in  $\text{PhMe}$  (60 mL) was stirred at room temperature for 20 minutes, then *N*-(allyl(phenyl)carbamothioyl)benzamide **1a** (1185.6 mg, 4 mmol) was added. The mixture was stirred at the room temperature for 2 h until alkenyl thioureas **1a** was consumed. Then the reaction mixture was quenched with saturated  $\text{NaHCO}_3$  solution, extracted with EA, and the combined organic phases were washed with brine, dried with anhydrous  $\text{Na}_2\text{SO}_4$  and filtered. The filtrate was concentrated under reduced pressure and the residue was purified by flash chromatography on silica gel using petroleum ether: dichloromethane = 1:2 to give **3a** as yellow liquid (872.3 mg, 69%).

### 9. The 10 mmol scale of procedures for 4a.

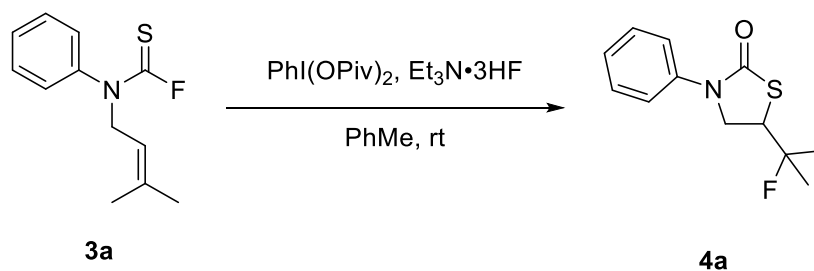

A solution of  $\text{PhI}(\text{OPiv})_2$  (8125.2 mg, 20 mmol) and  $\text{Et}_3\text{N}\cdot 3\text{HF}$  (5016.3 mg, 30 mmol) in  $\text{PhMe}$  (100 mL) was stirred at room temperature for 10 minutes, then (3-methylbut-2-en-1-yl)(phenyl)carbamothioic fluoride **3a** (2233.1 mg, 10 mmol) was added. The mixture was stirred at the room temperature for 4 h until thiocarbonyl fluorides **3a** was consumed. Then the reaction mixture was quenched with saturated  $\text{NaHCO}_3$  solution, extracted with EA, and the combined organic phases were washed with brine, dried with anhydrous  $\text{Na}_2\text{SO}_4$  and filtered. The filtrate was concentrated under reduced pressure and the residue was purified by flash chromatography on silica gel using petroleum ether: ethyl acetate = 10:1 to give **4a** as white solid

(1923.9 mg, 80%).

#### 10. The 4.6 mmol scale of procedures for 6a.

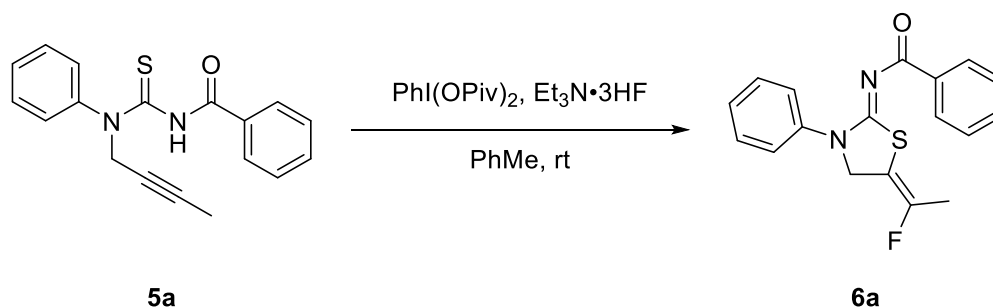

A solution of  $\text{PhI}(\text{OPiv})_2$  (1962.2 mg, 4.83 mmol) and  $\text{Et}_3\text{N}\cdot 3\text{HF}$  (2692.1 mg, 16.1 mmol) in dioxane (69 mL) was stirred at room temperature for 10 minutes, then N-(but-2-yn-1-yl(phenyl)carbamothioyl)benzamide **5a** (1418.6 mg, 4.6 mmol) was added. The mixture was stirred at the room temperature for 4 h until alkynyl thioureas **5a** was consumed. Then the reaction mixture was quenched with saturated  $\text{NaHCO}_3$  solution, extracted with EA, and the combined organic phases were washed with brine, dried with anhydrous  $\text{Na}_2\text{SO}_4$  and filtered. The filtrate was concentrated under reduced pressure and the residue was purified by flash chromatography on silica gel using petroleum ether: ethyl acetate = 10:1 to give **6a** as white solid (766.2 mg, 51%).

#### 11. The X-ray crystallographic analysis for 2af (CCDC 2364347)

With 50% ellipsoid:

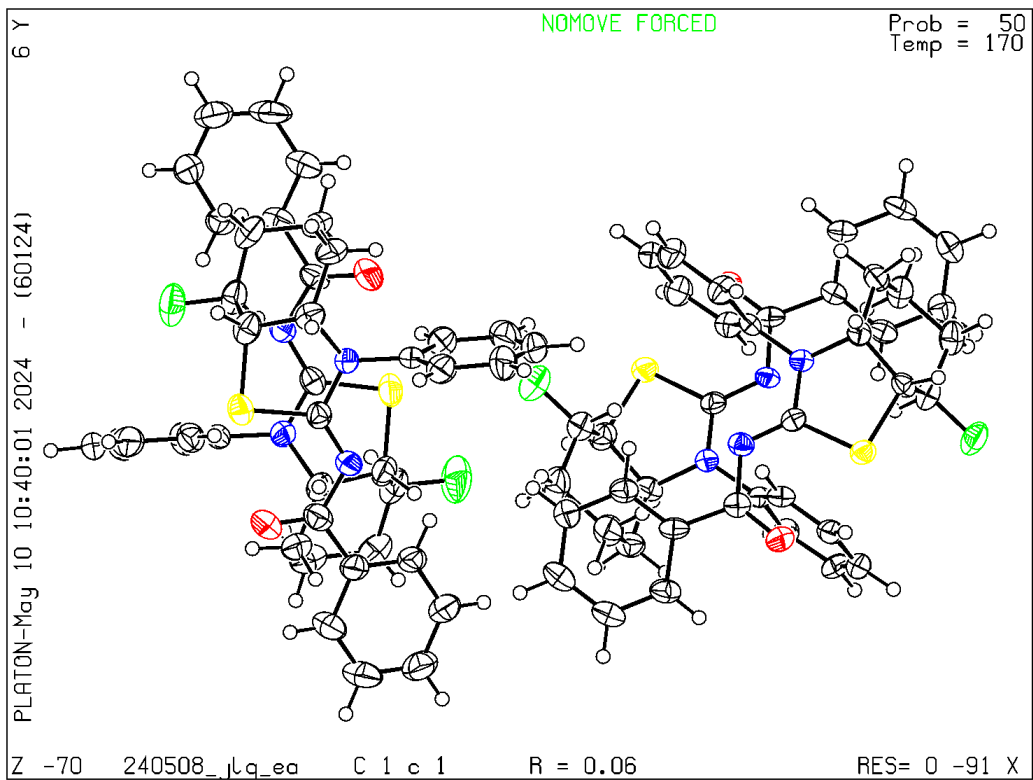

|||

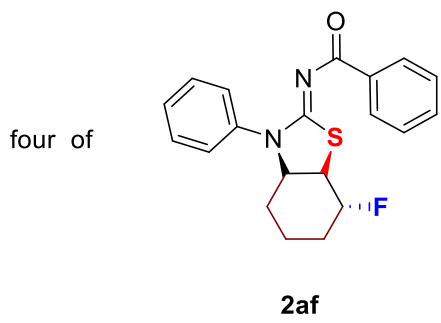

Bond precision: C-C = 0.0091 Å Wavelength=1.34139  
 Cell: a=20.6128(9) b=9.2353(4) c=37.9915(19)  
 alpha=90 beta=103.249(2) gamma=90  
 Temperature: 170 K

|                        | Calculated       | Reported         |
|------------------------|------------------|------------------|
| Volume                 | 7039.8(6)        | 7039.8(6)        |
| Space group            | C c              | C 1 c 1          |
| Hall group             | C -2yc           | C -2yc           |
| Moiety formula         | C20 H19 F N2 O S | C20 H19 F N2 O S |
| Sum formula            | C20 H19 F N2 O S | C20 H19 F N2 O S |
| Mr                     | 354.43           | 354.43           |
| Dx, g cm <sup>-3</sup> | 1.338            | 1.338            |
| Z                      | 16               | 16               |
| Mu (mm <sup>-1</sup> ) | 1.177            | 1.177            |
| F000                   | 2976.0           | 2976.0           |
| F000'                  | 2986.94          |                  |
| h, k, lmax             | 26, 12, 49       | 26, 12, 49       |
| Nref                   | 16200 [ 8103]    | 15342            |
| Tmin, Tmax             | 0.932, 0.954     | 0.674, 0.752     |
| Tmin'                  | 0.910            |                  |

Correction method= # Reported T Limits: Tmin=0.674 Tmax=0.752  
 AbsCorr = MULTII-SCAN

Data completeness= 1.89/0.95 Theta(max)= 60.739

R(reflections)= 0.0566( 12785) wR2(reflections)=  
 0.1495( 15342)  
 S = 1.077 Npar= 902

## 12. 1D NOESY spectra.

### 12.1 1D NOESY spectra of 2af

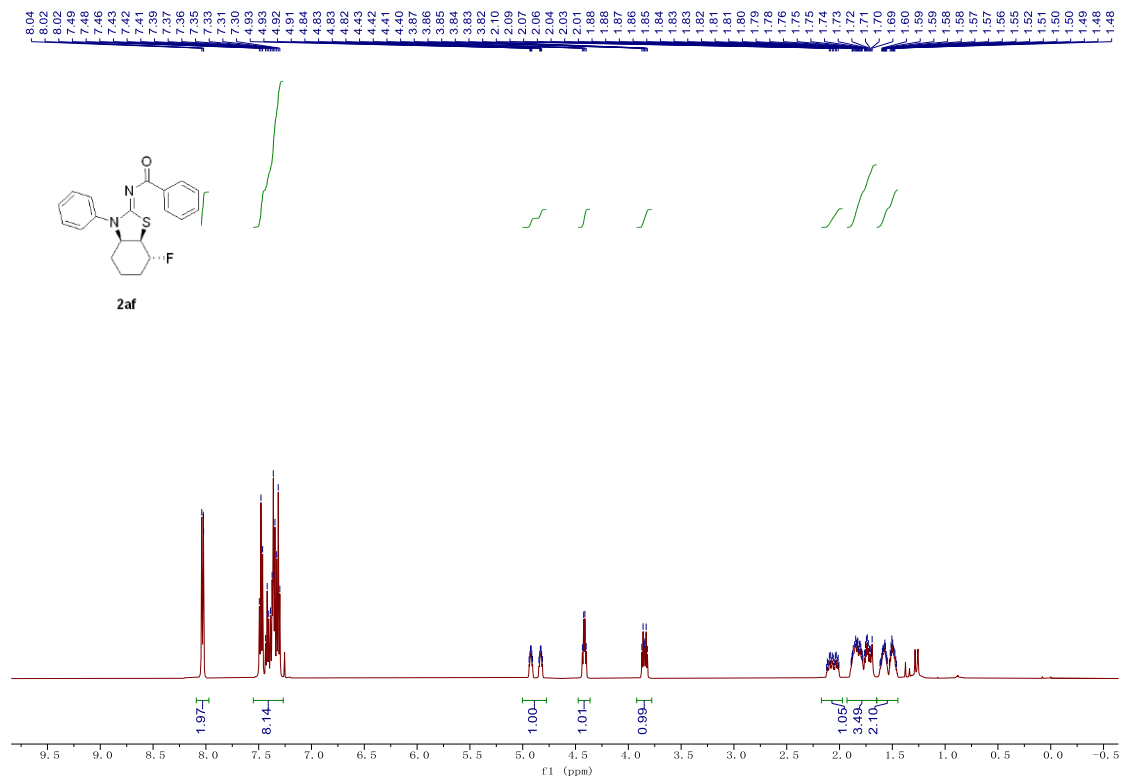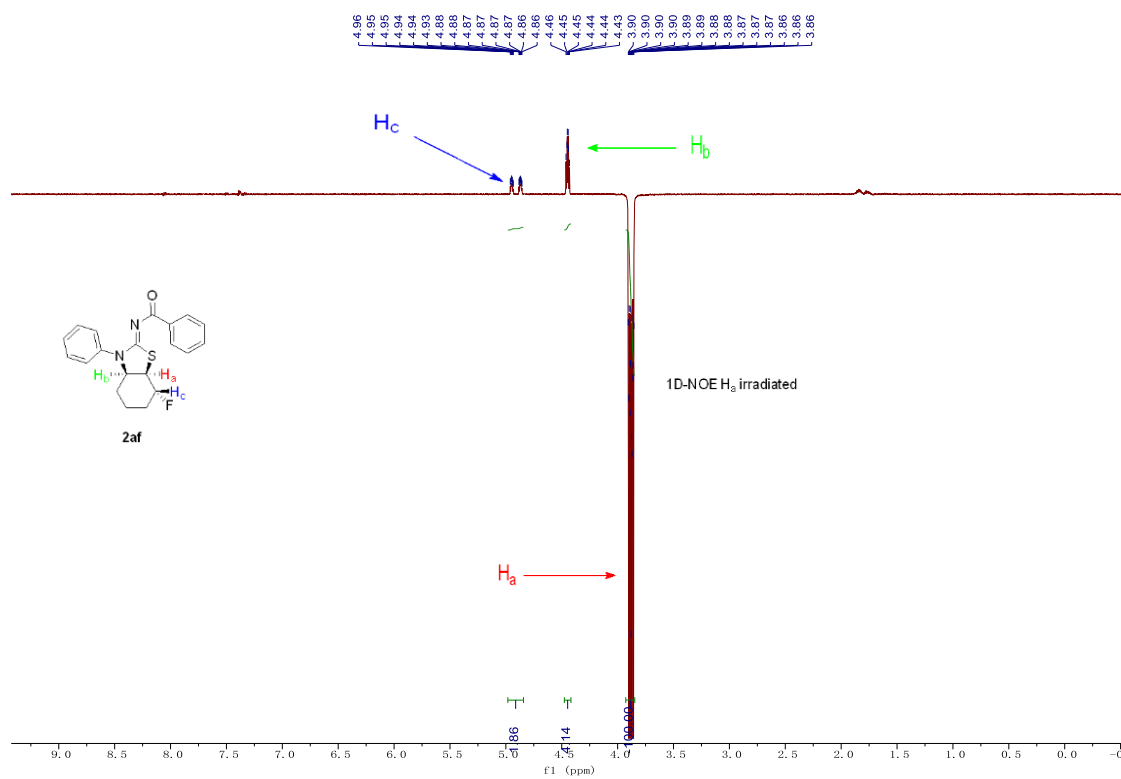

NOE (H<sub>b</sub>) enhancement = 4.1%, NOE(H<sub>c</sub>) enhancement = 1.9%



1D NOESY spectra of **2af** is shown as above. When the hydrogen  $H_a$  of the methine attached to sulfur was irradiated, the 1D NOESY spectra shows that the NOE enhancement of  $H_b$  of the methine attached to nitrogen is 4.1%. The NOE enhancement of  $H_c$  of the methine attached to fluorine is 1.9%.

### 12.2 1D NOESY spectra of **2ag**

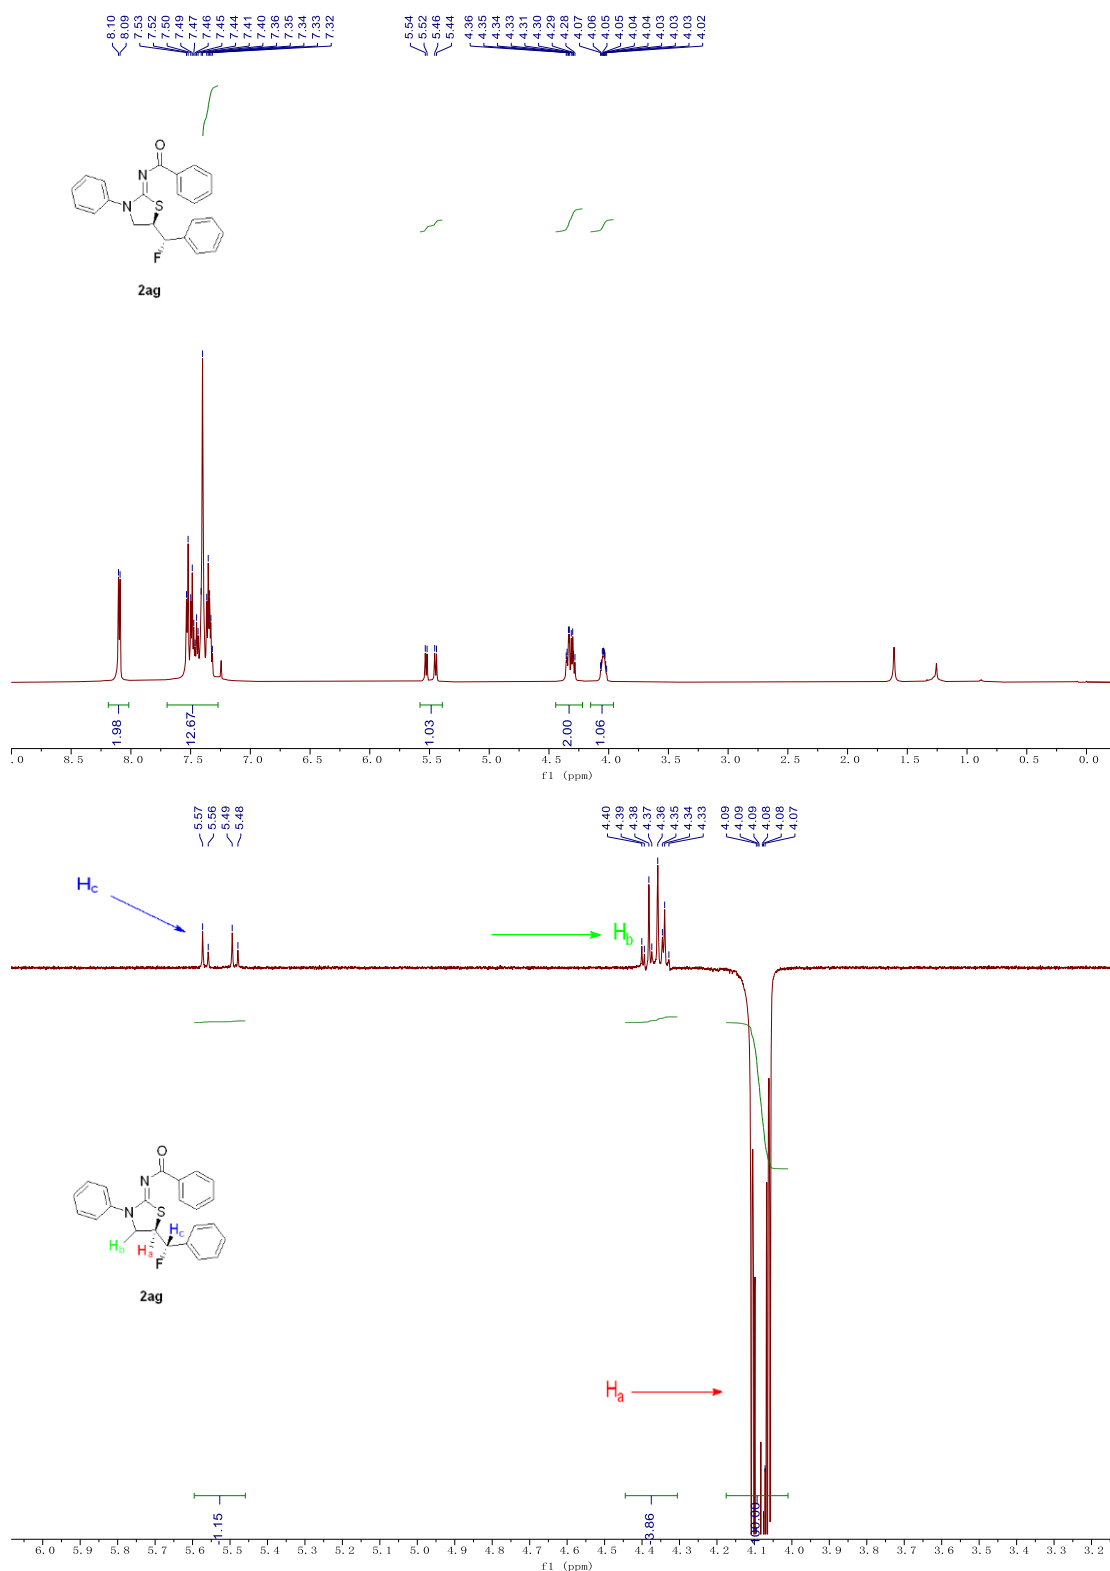

NOE ( $H_b$ ) enhancement = 3.9%, NOE( $H_c$ ) enhancement = 1.2%

1D NOESY spectra of **2ag** is shown as above. When the hydrogen  $H_a$  of the methine attached to sulfur was irradiated, the 1D NOESY spectra shows that the NOE enhancement of  $H_b$  of the methine attached to nitrogen is 3.9%. The NOE enhancement of  $H_c$  of the methine attached to fluorine is 1.2%.

### 12.3 1D NOESY spectra of **4k**

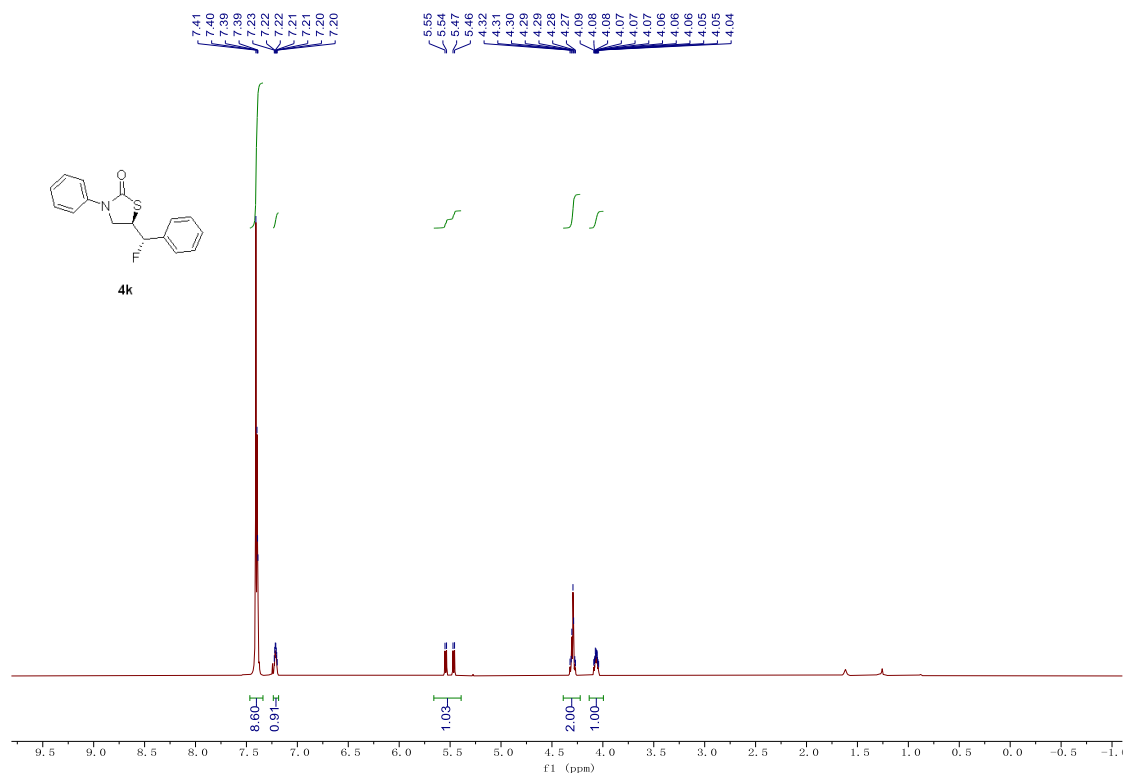

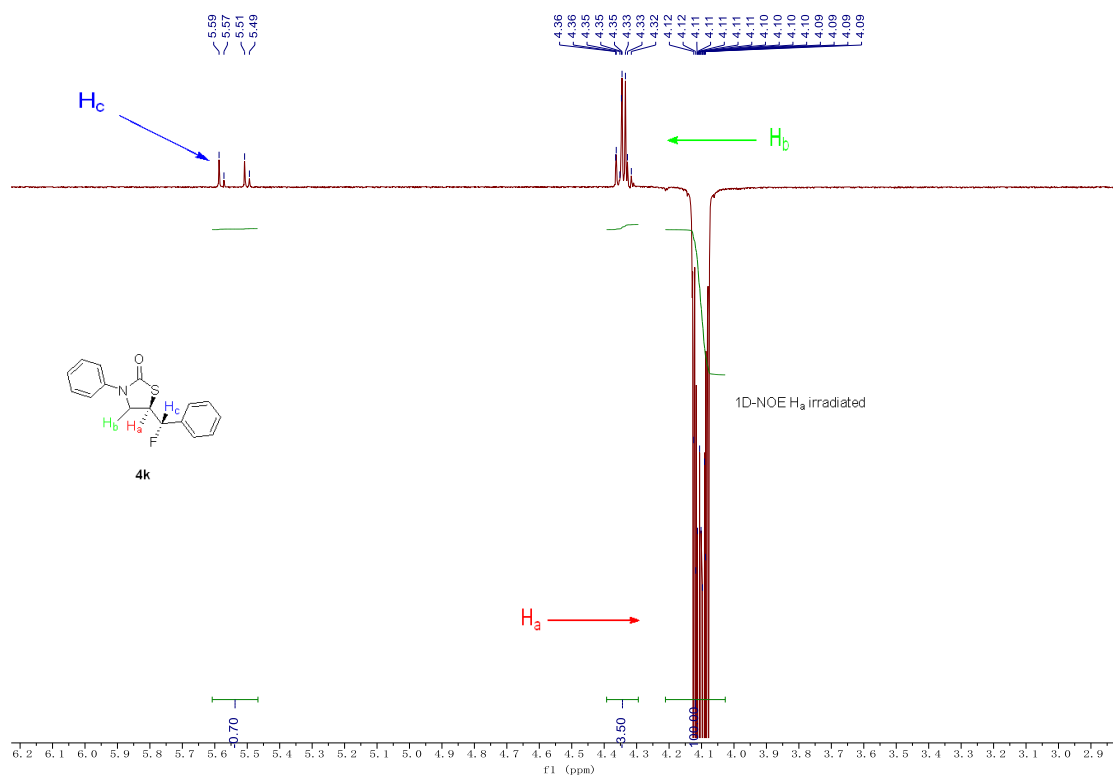

NOE ( $H_b$ ) enhancement = 3.5%, NOE( $H_c$ ) enhancement = 0.7%

1D NOESY spectra of **4k** is shown as above. When the hydrogen  $H_a$  of the methine attached to sulfur was irradiated, the 1D NOESY spectra shows that the NOE enhancement of  $H_b$  of the methine attached to nitrogen is 3.5%. The NOE enhancement of  $H_c$  of the methine attached to fluorine is 0.7%.

## 12.4 1D NOESY spectra of 4l

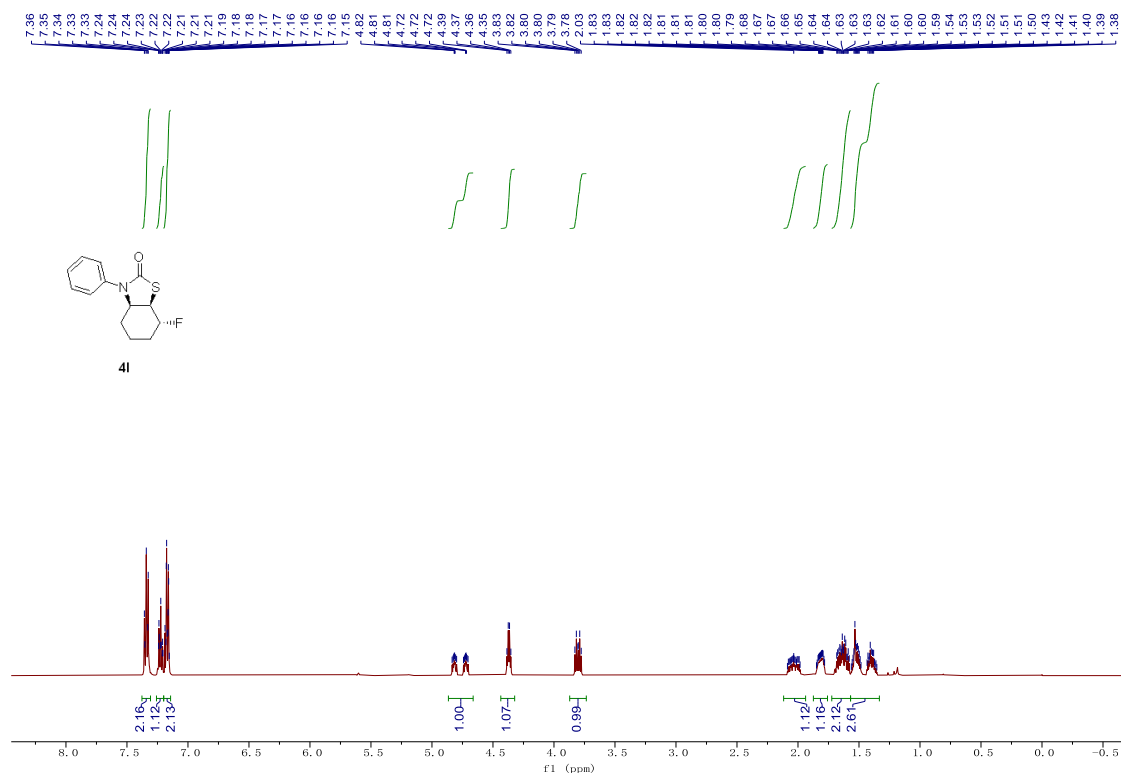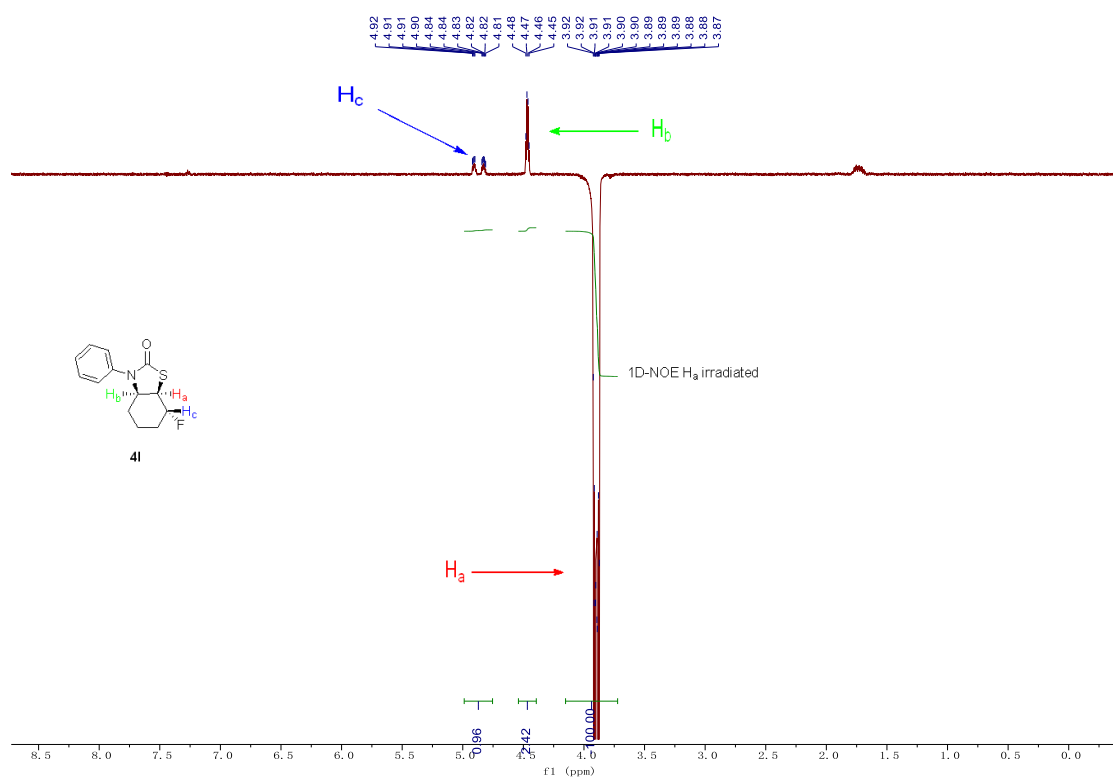

NOE (H<sub>b</sub>) enhancement = 2.4%, NOE(H<sub>c</sub>) enhancement = 1.0%

1D NOESY spectra of 4k is shown as above. When the hydrogen H<sub>a</sub> of the methine attached to sulfur was irradiated, the 1D NOESY spectra shows that the NOE enhancement of H<sub>b</sub> of the methine attached

to nitrogen is 2.4%. The NOE enhancement of  $H_c$  of the methine attached to fluorine is 1.0%.

### 12.5 1D NOESY spectra of 4m

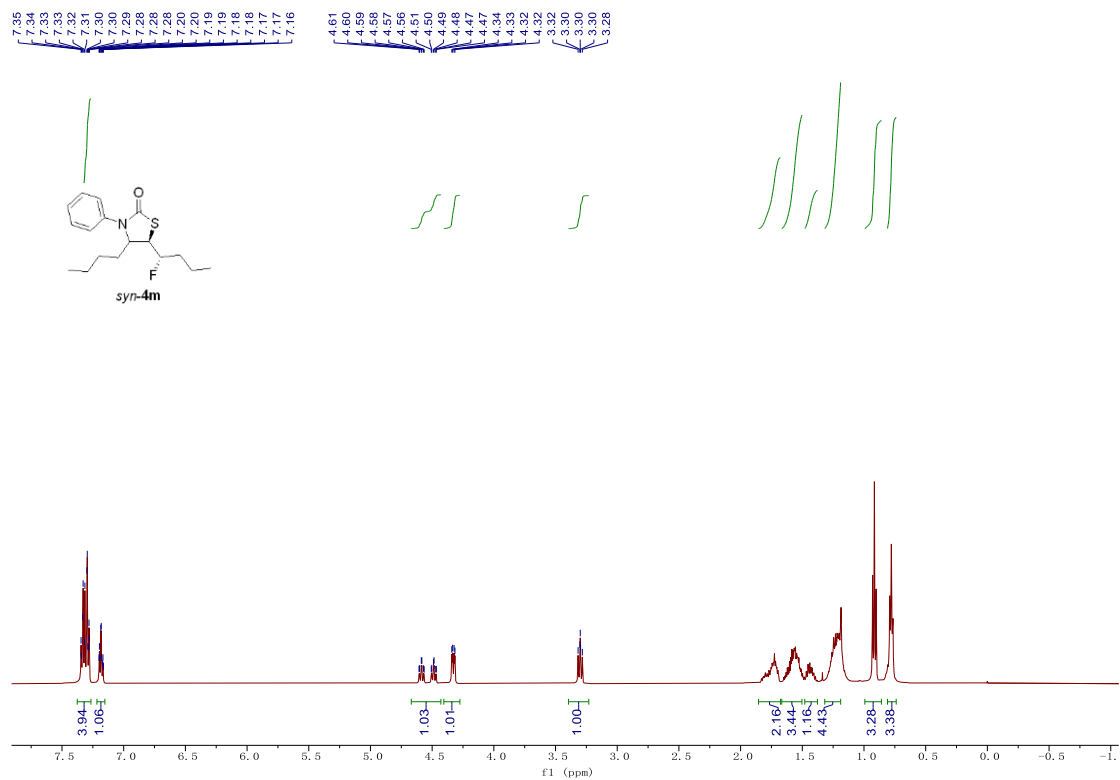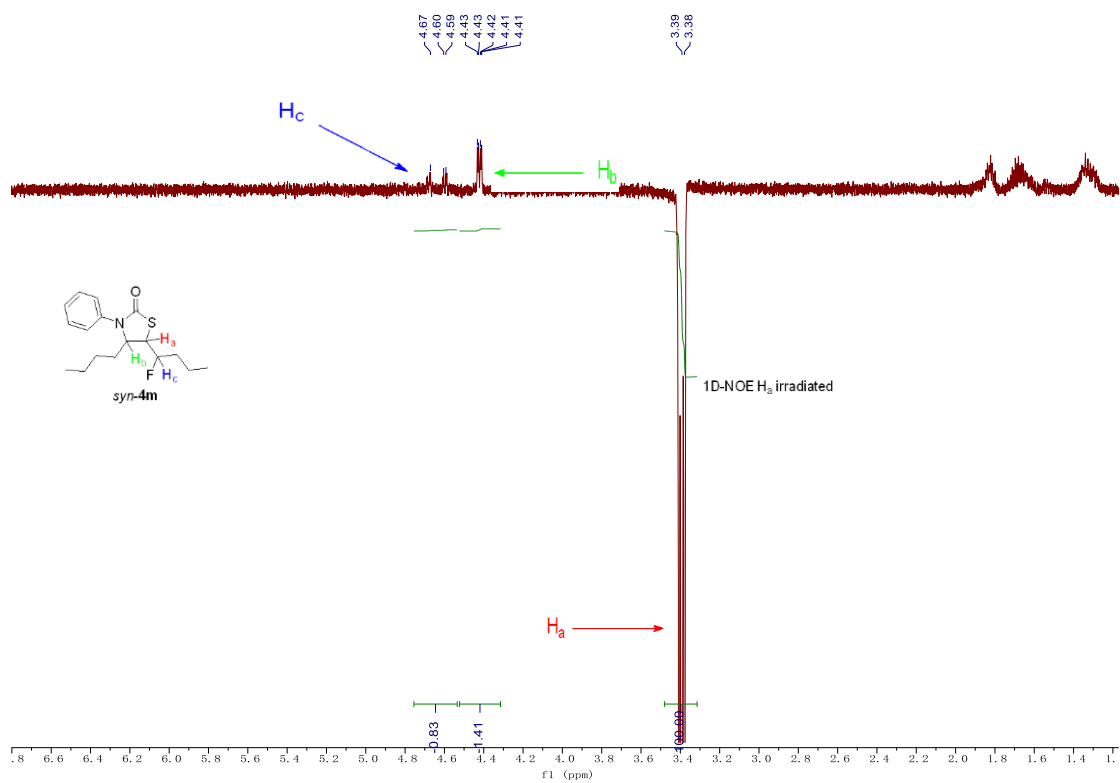

NOE ( $H_b$ ) enhancement = 1.4%, NOE( $H_c$ ) enhancement = 0.8%

1D NOESY spectra of anti-4n is shown as above. When the hydrogen H<sub>a</sub> of the methine attached to sulfur was irradiated, the 1D NOESY spectra shows that the NOE enhancement of H<sub>b</sub> of the methine attached to nitrogen is 1.4%. The NOE enhancement of H<sub>c</sub> of the methine attached to fluorine is 0.8%.

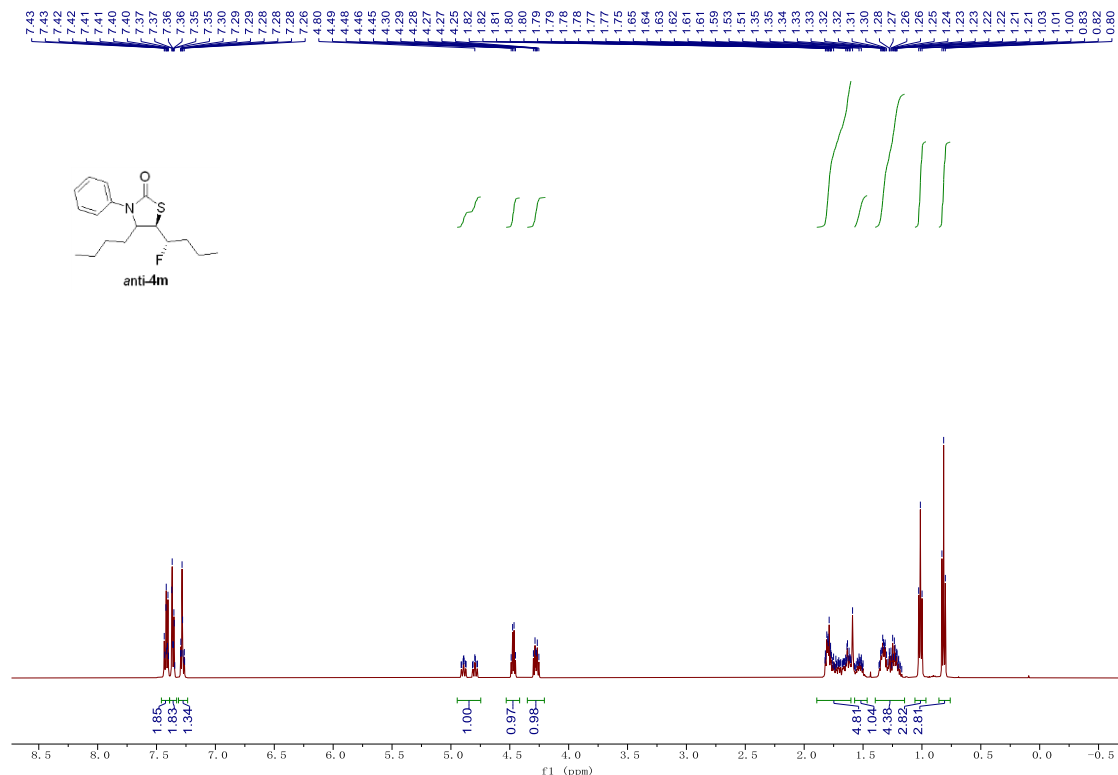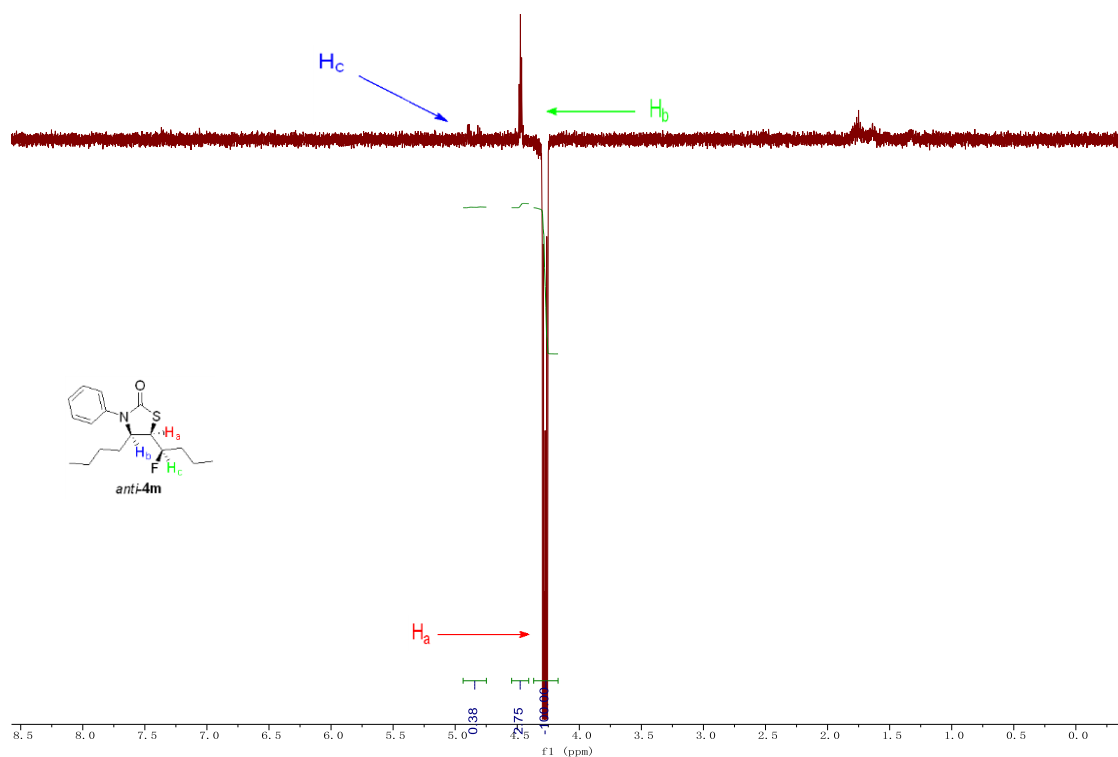

NOE (H<sub>b</sub>) enhancement = 2.8%, NOE(H<sub>c</sub>) enhancement = 0.4%

1D NOESY spectra of syn-4n is shown as above. When the hydrogen H<sub>a</sub> of the methine attached to sulfur was irradiated, the 1D NOESY spectra shows that the NOE enhancement of H<sub>b</sub> of the methine attached to nitrogen is 1.4%. The NOE enhancement of H<sub>c</sub> of the methine attached to fluorine is 0.8%.

was irradiated, the 1D NOESY spectra shows that the NOE enhancement of  $H_b$  of the methine attached to nitrogen is 2.8%. The NOE enhancement of  $H_c$  of the methine attached to fluorine is 0.4%.

### 12.6 1D NOESY spectra of 6h

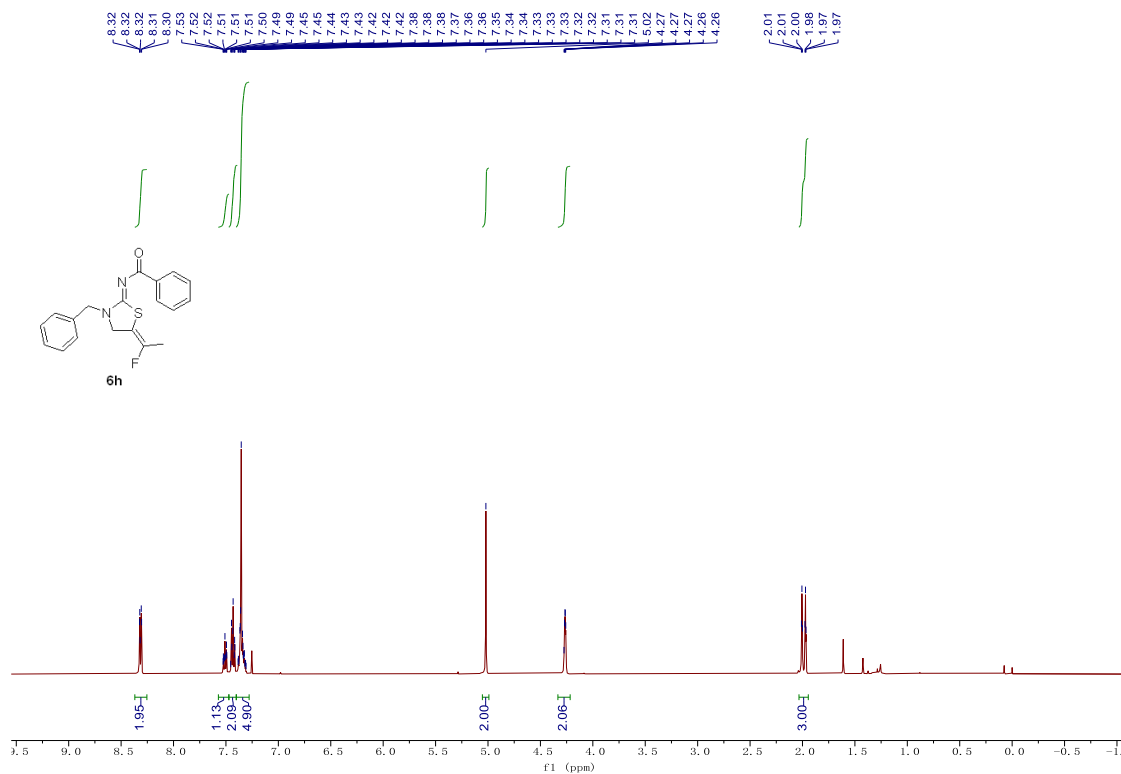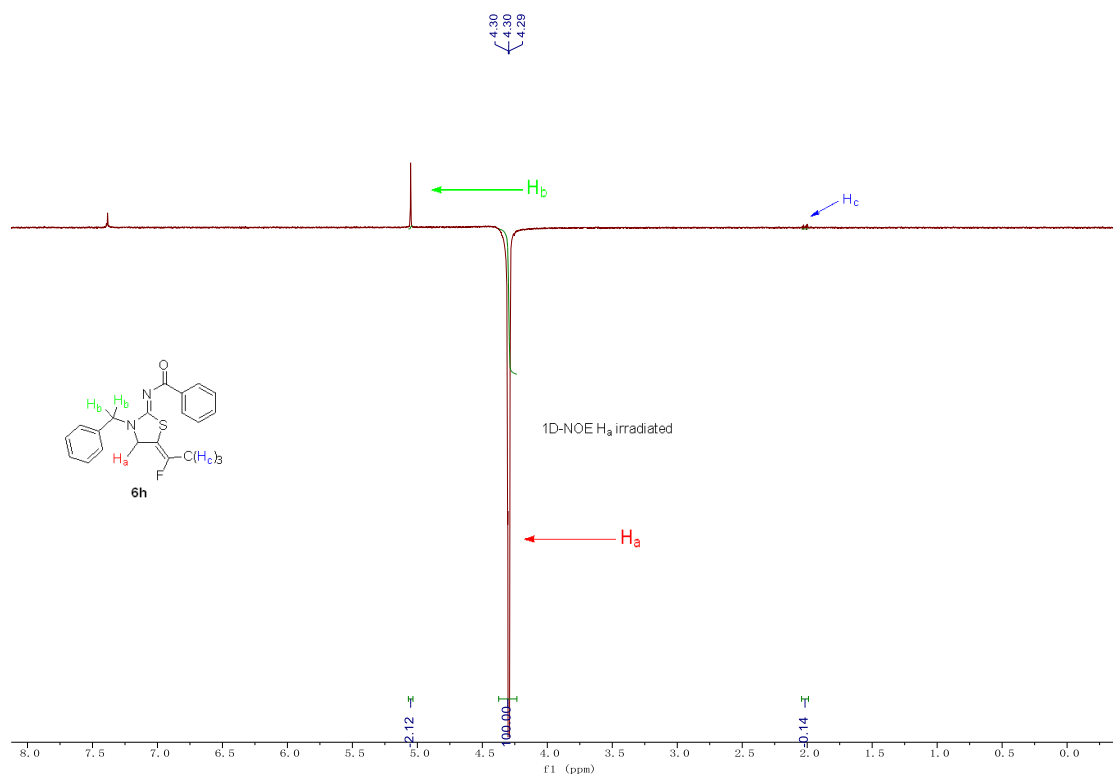

NOE( $H_c$ ) enhancement = 0.1%

1D NOESY spectra of **6h** is shown as above. When the hydrogen  $H_a$  of the methine attached to N-atom was irradiated, the 1D NOESY spectra shows that the NOE enhancement of  $H_c$  of the methine attached to double bond is 0.1%.

### 13. NMR spectra.

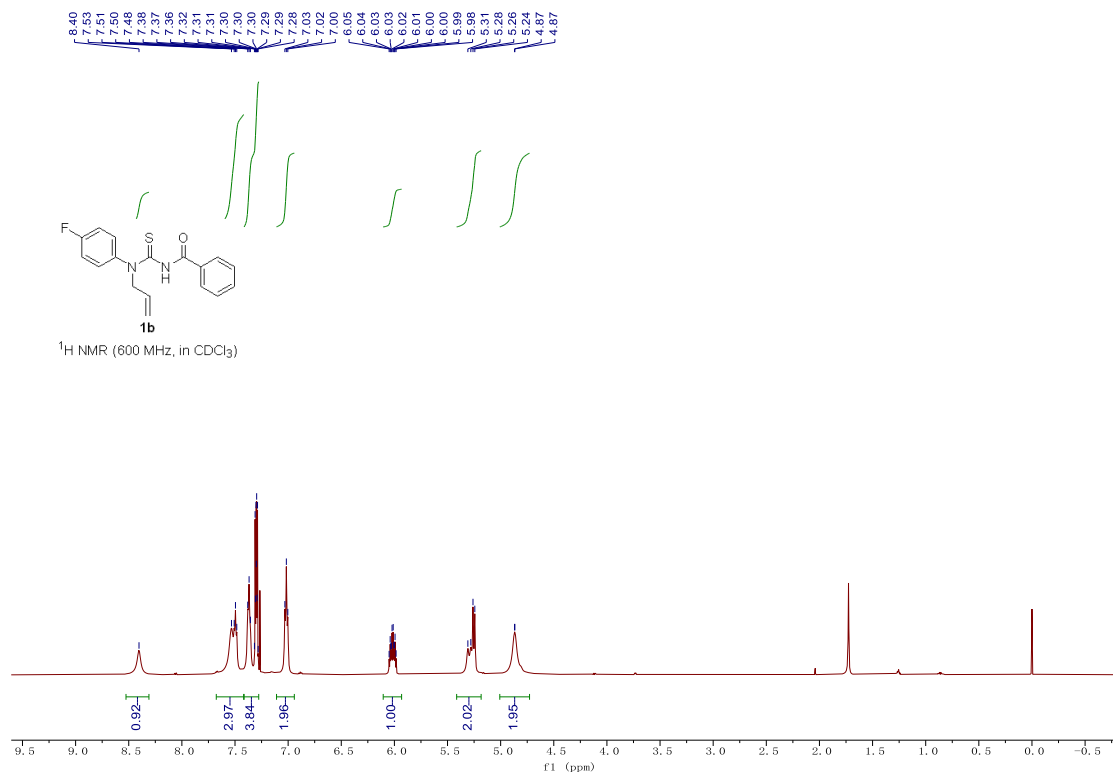



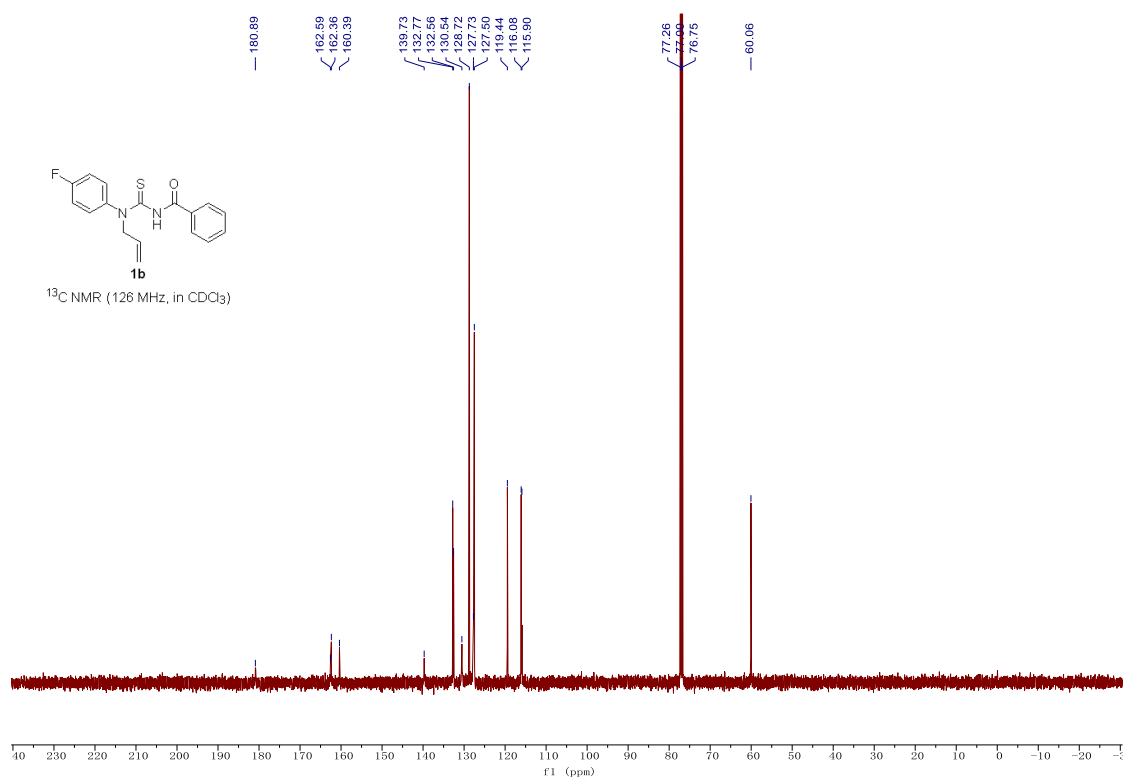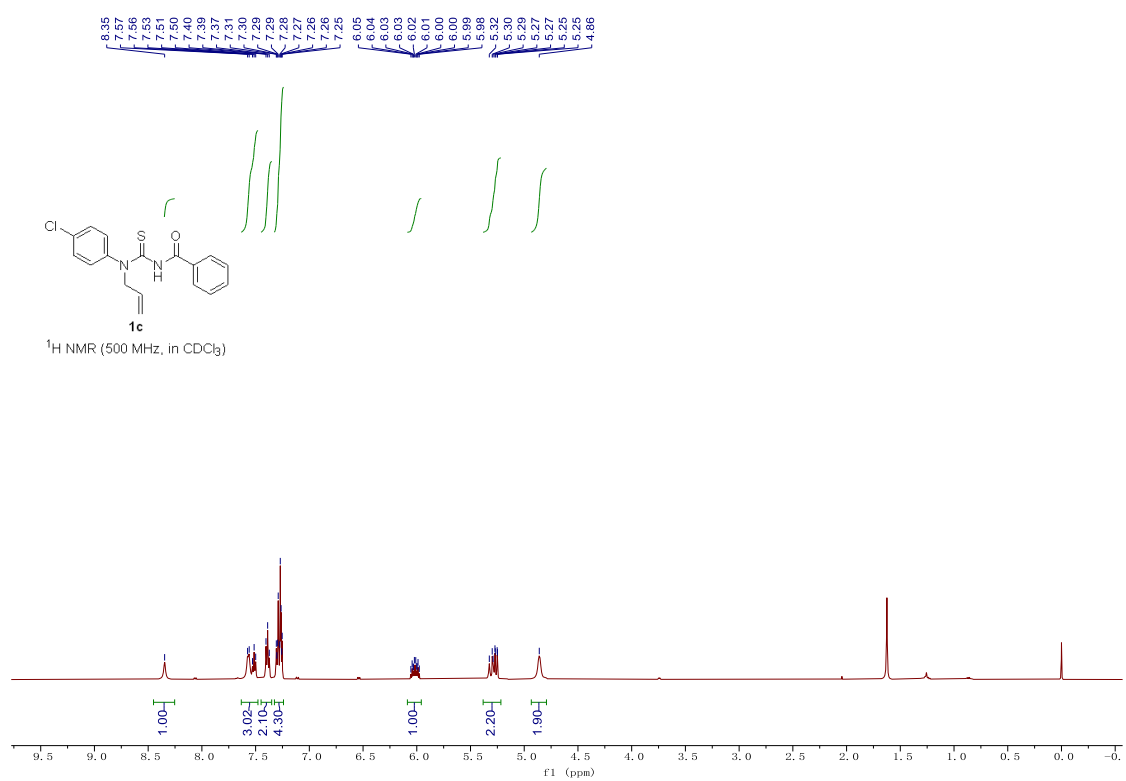

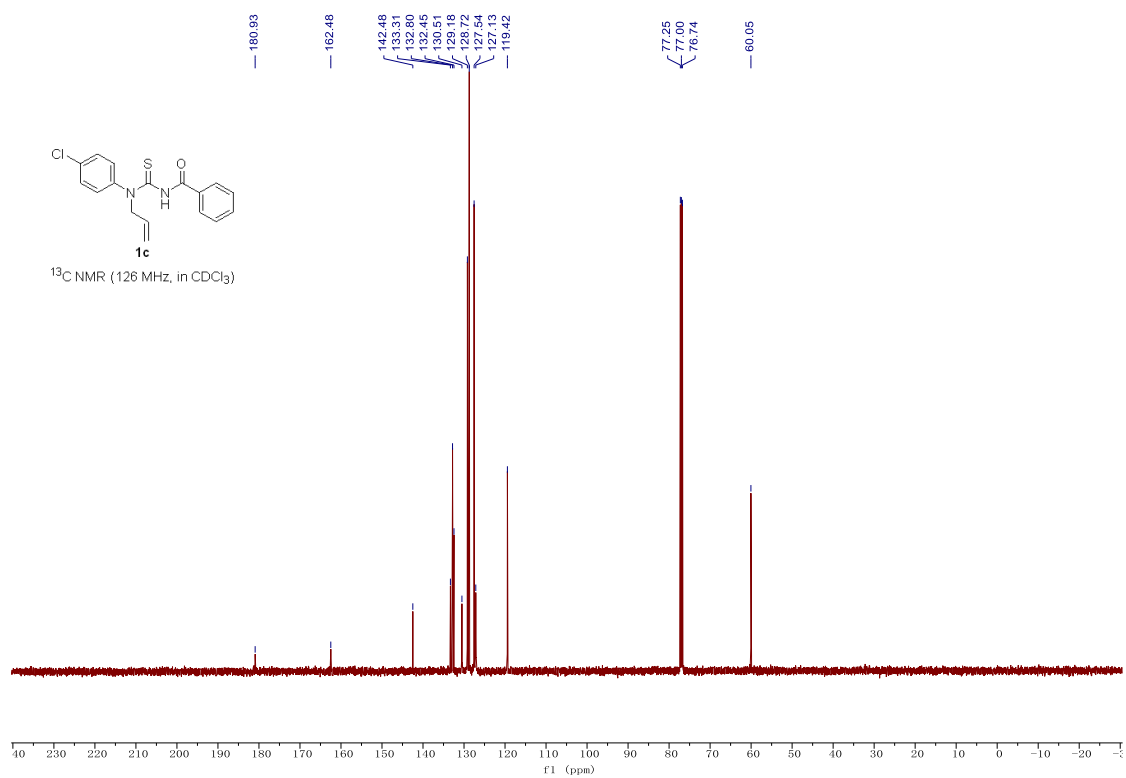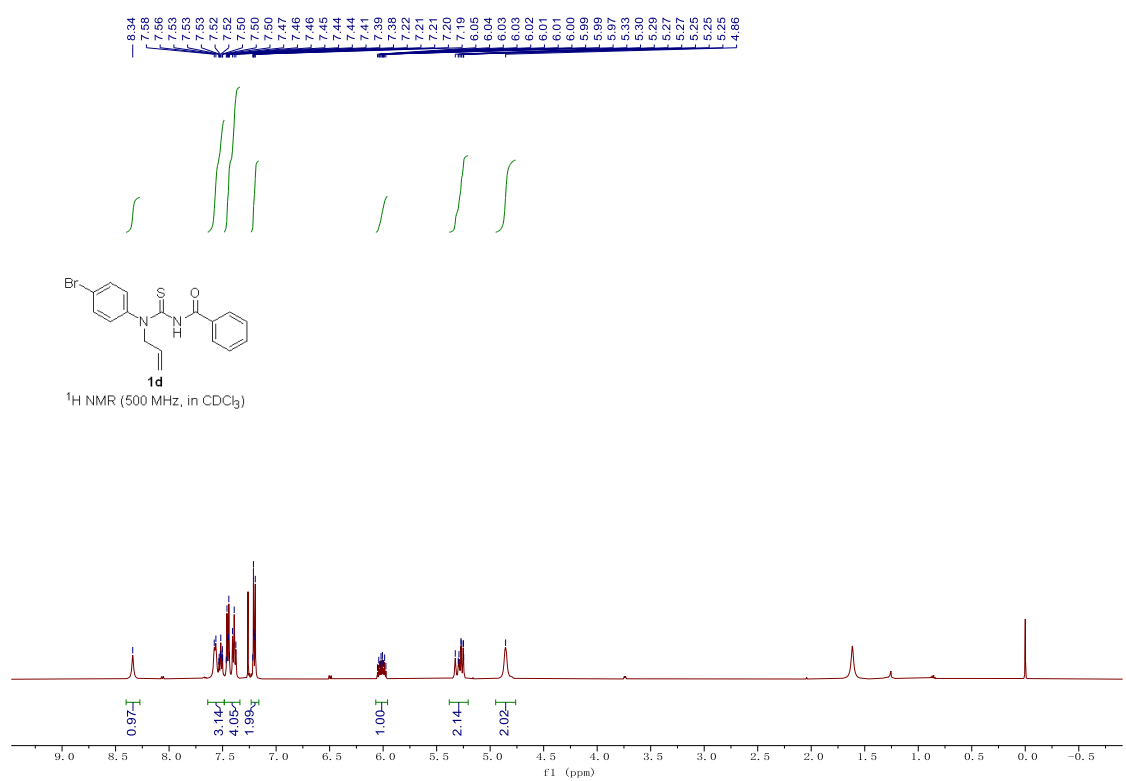

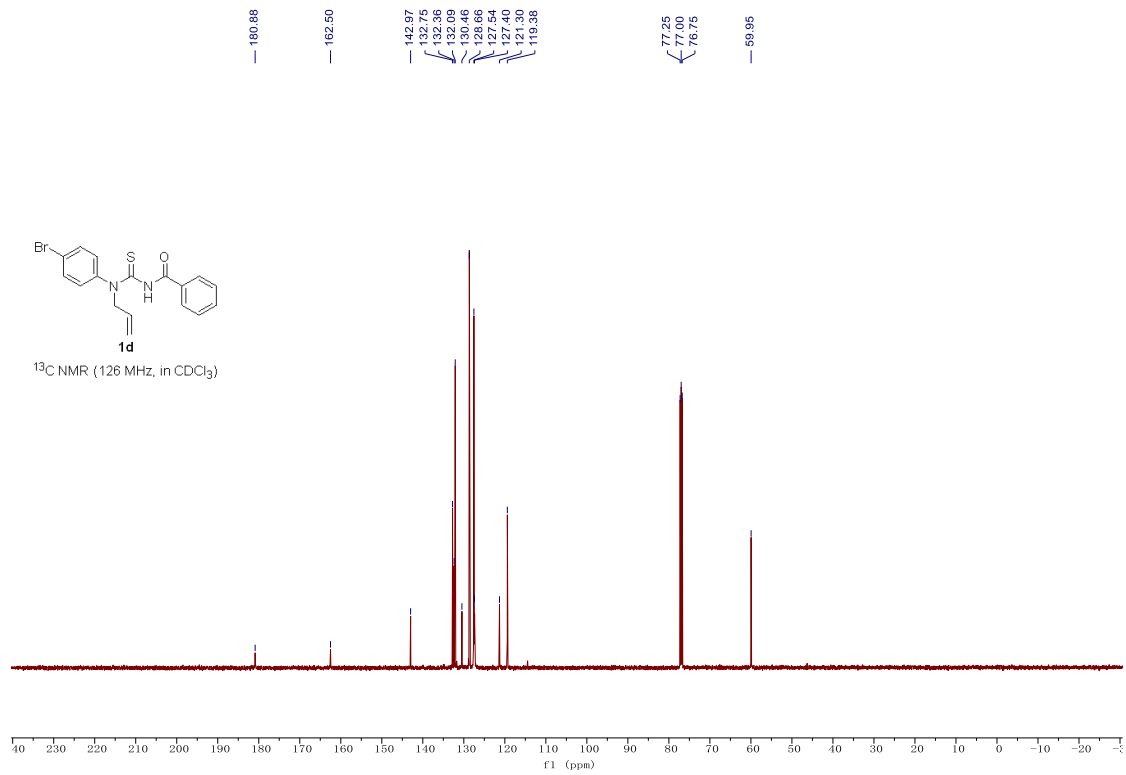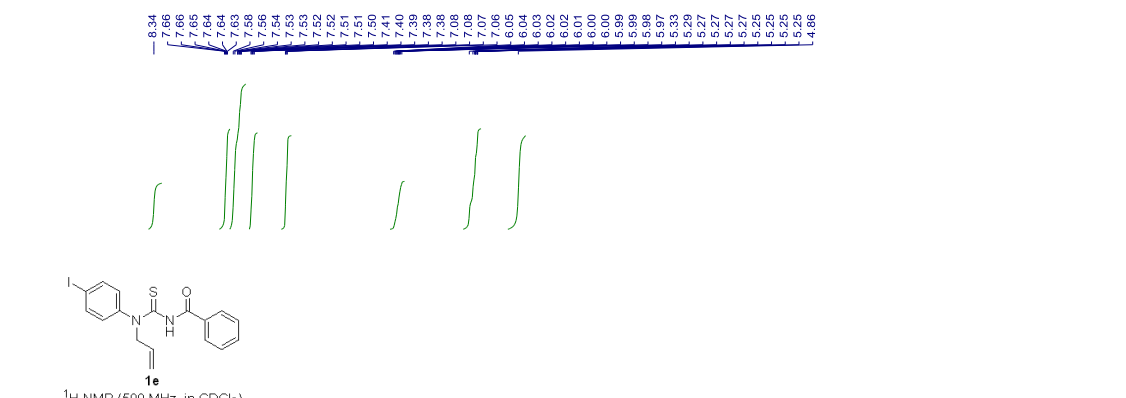

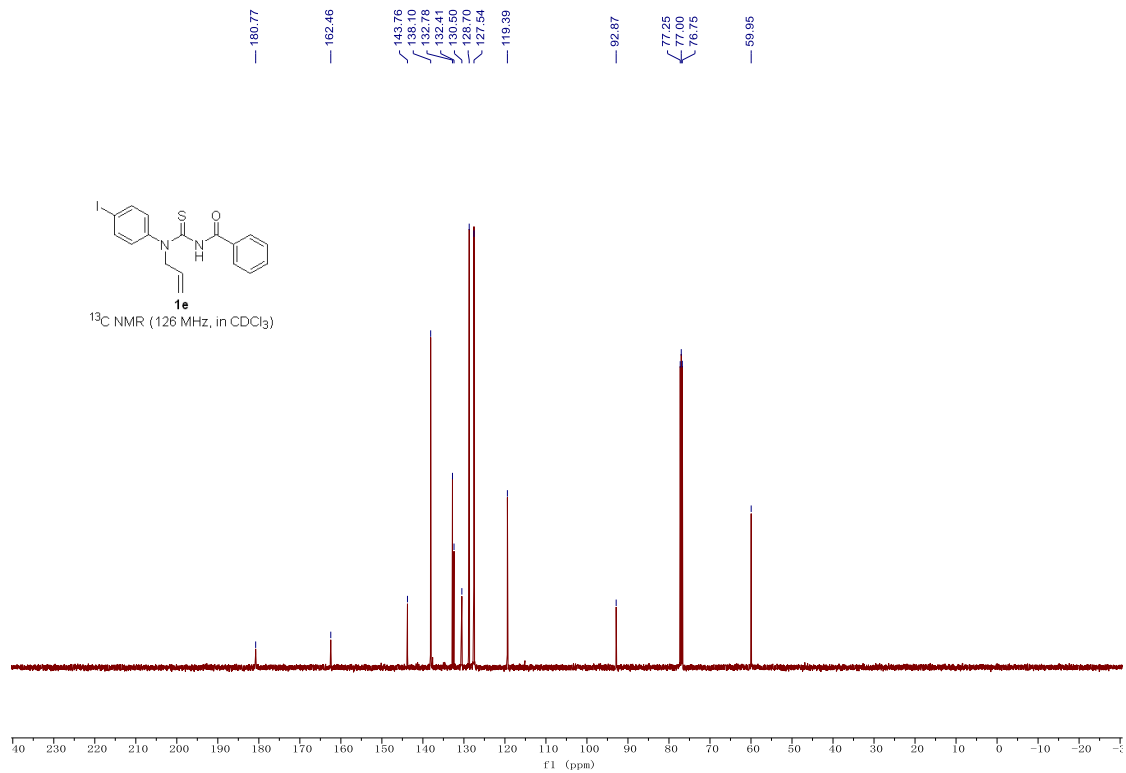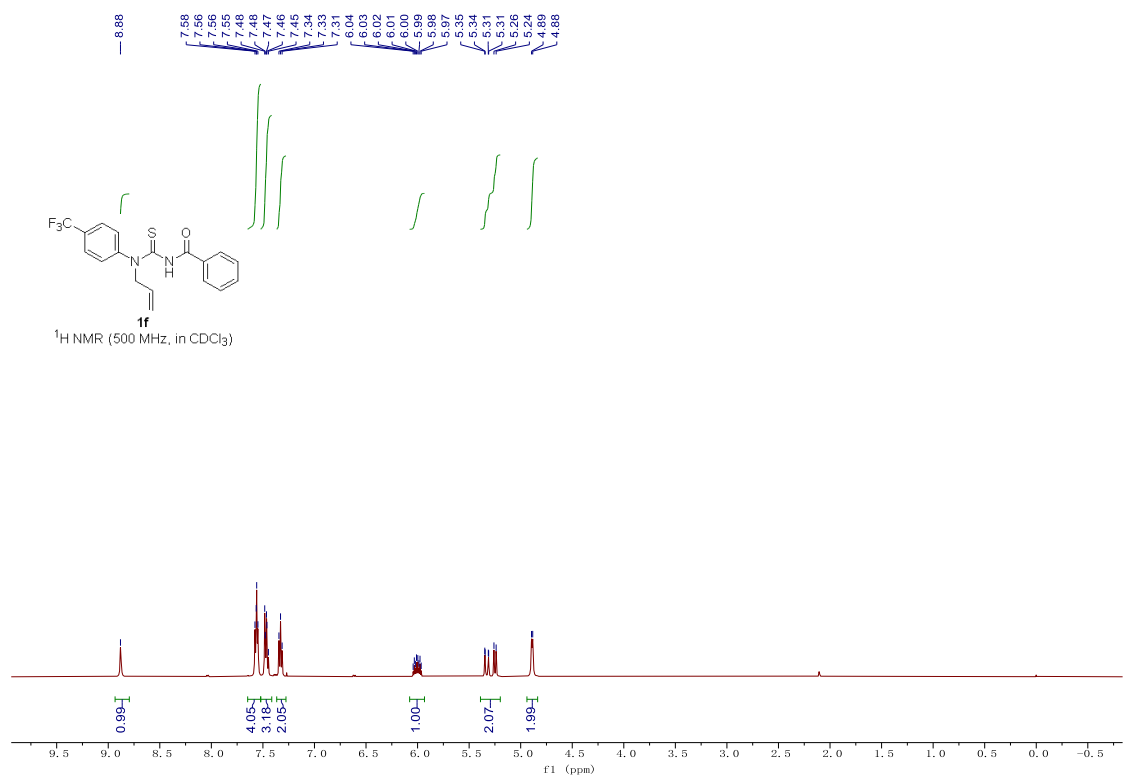

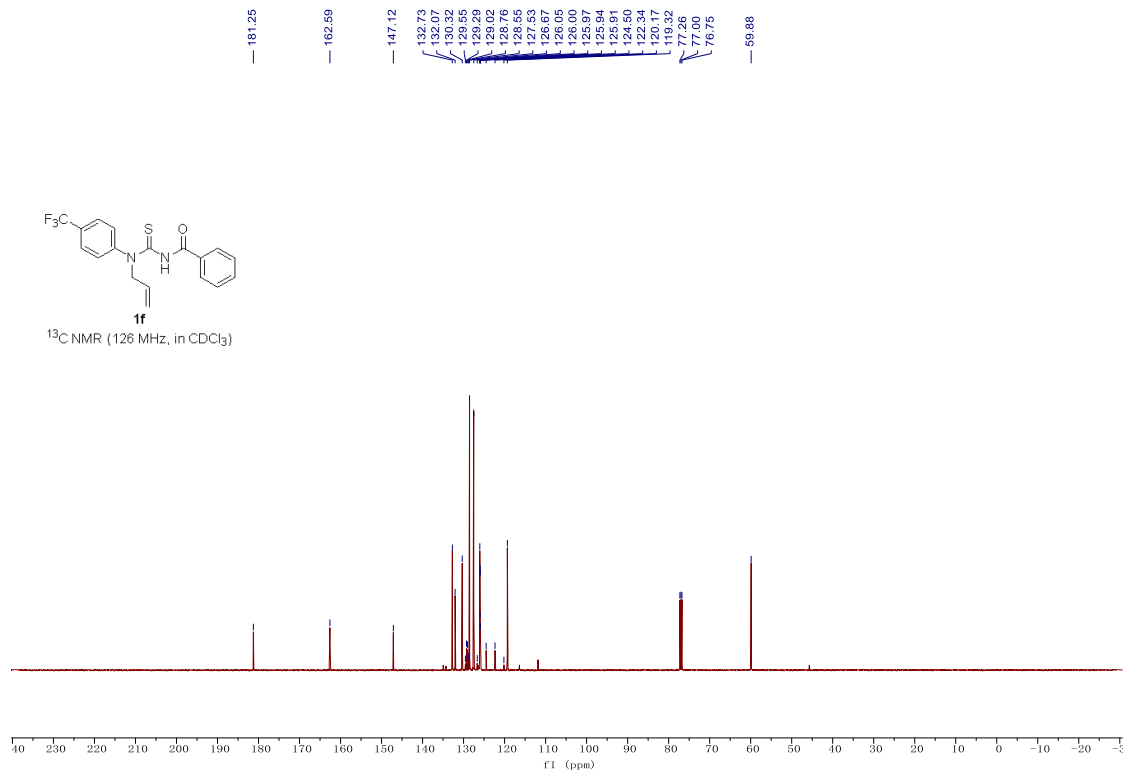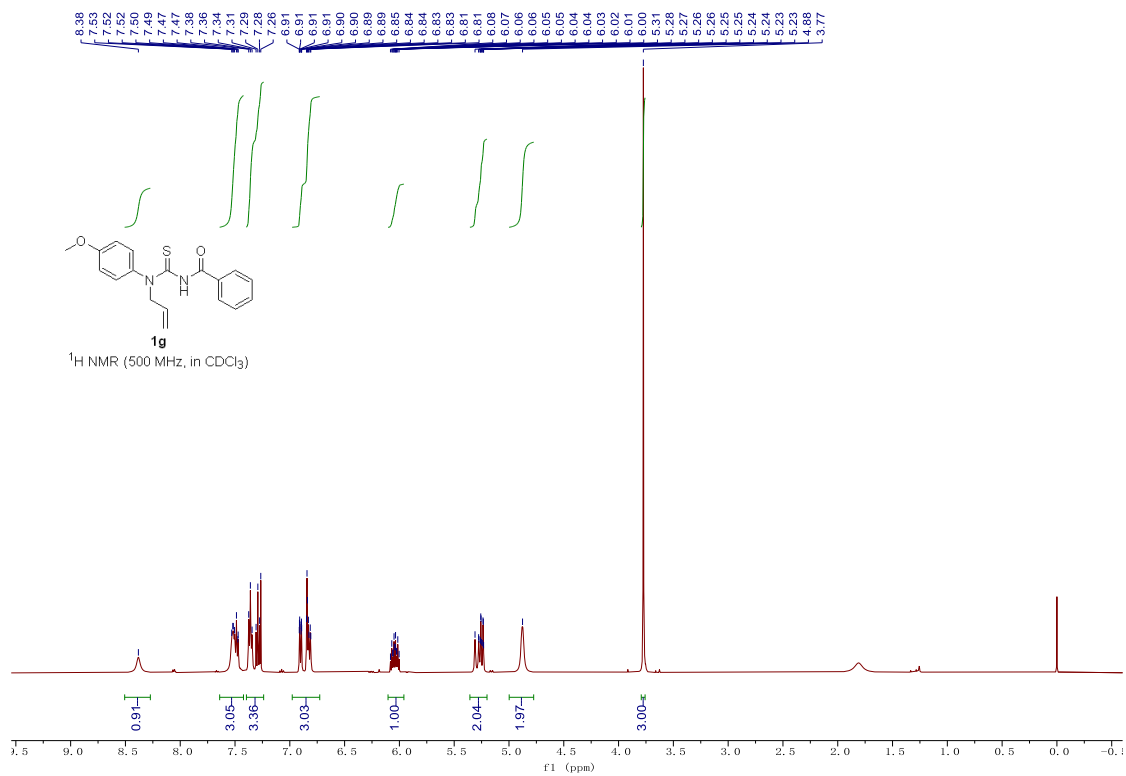

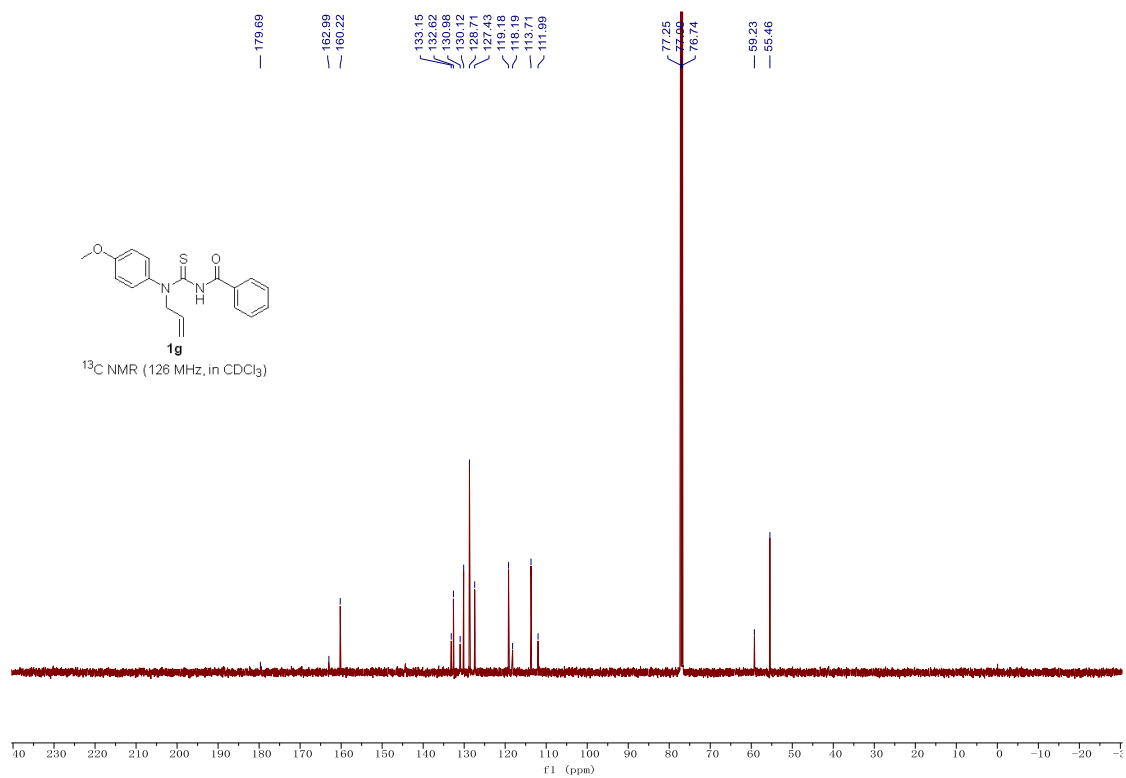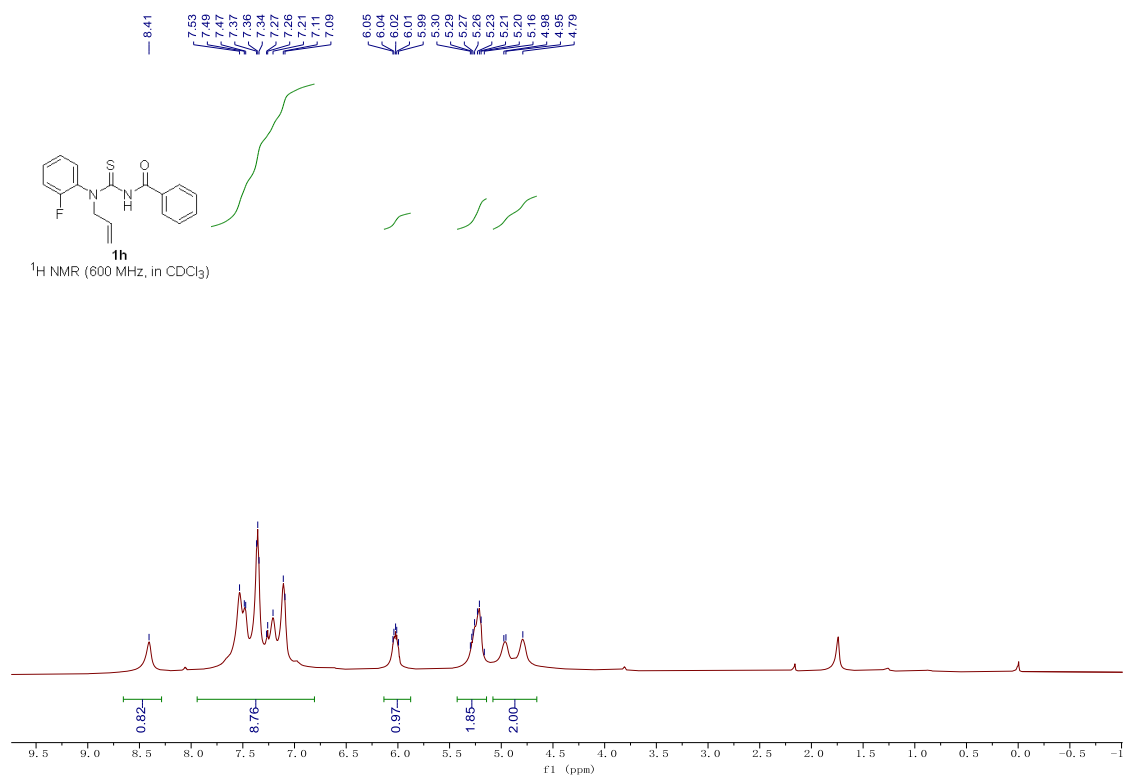

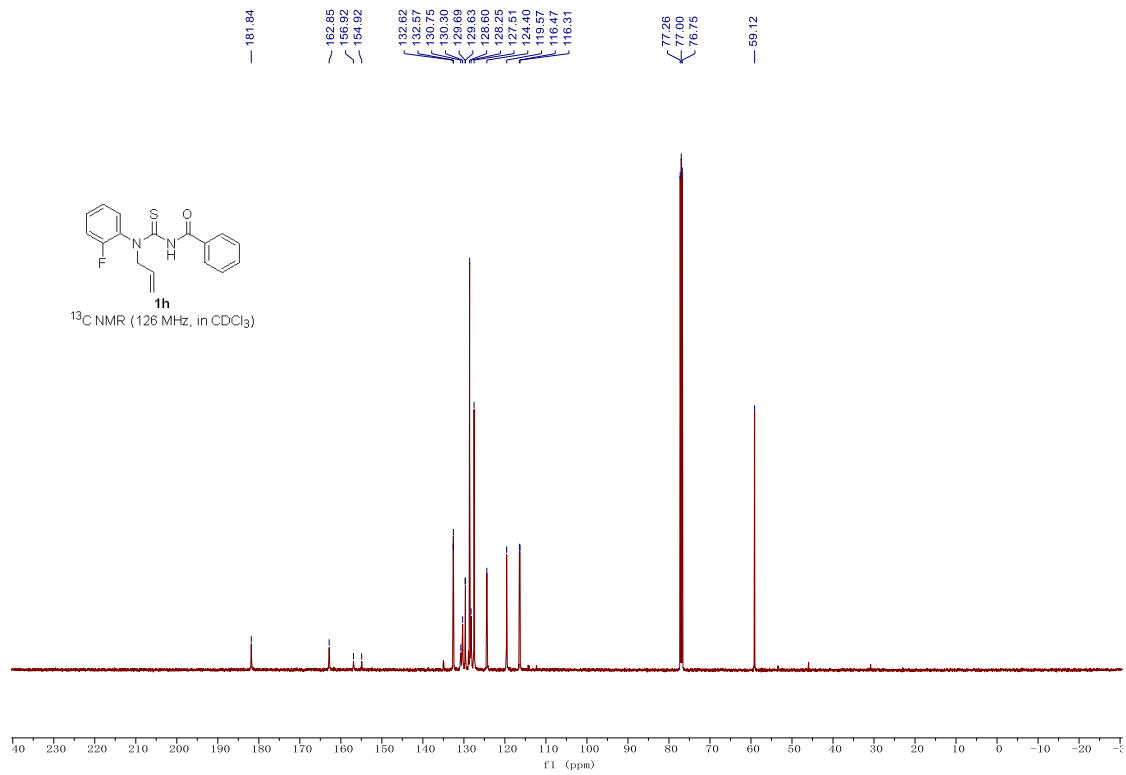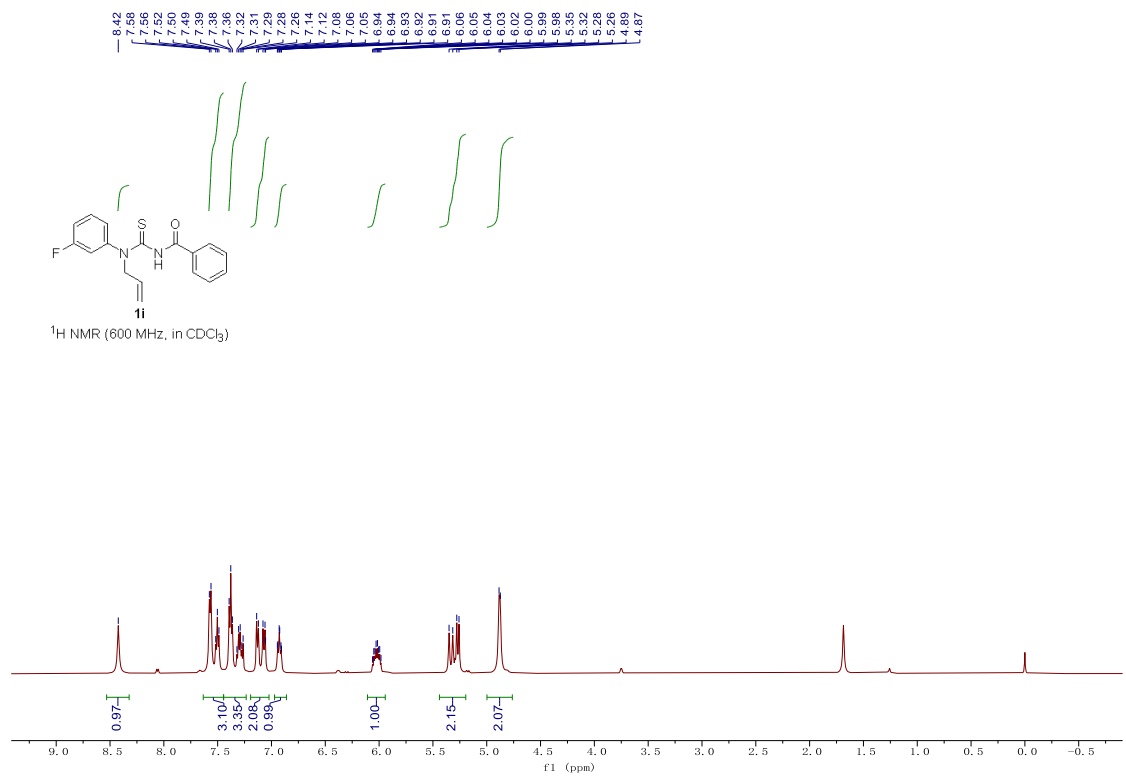

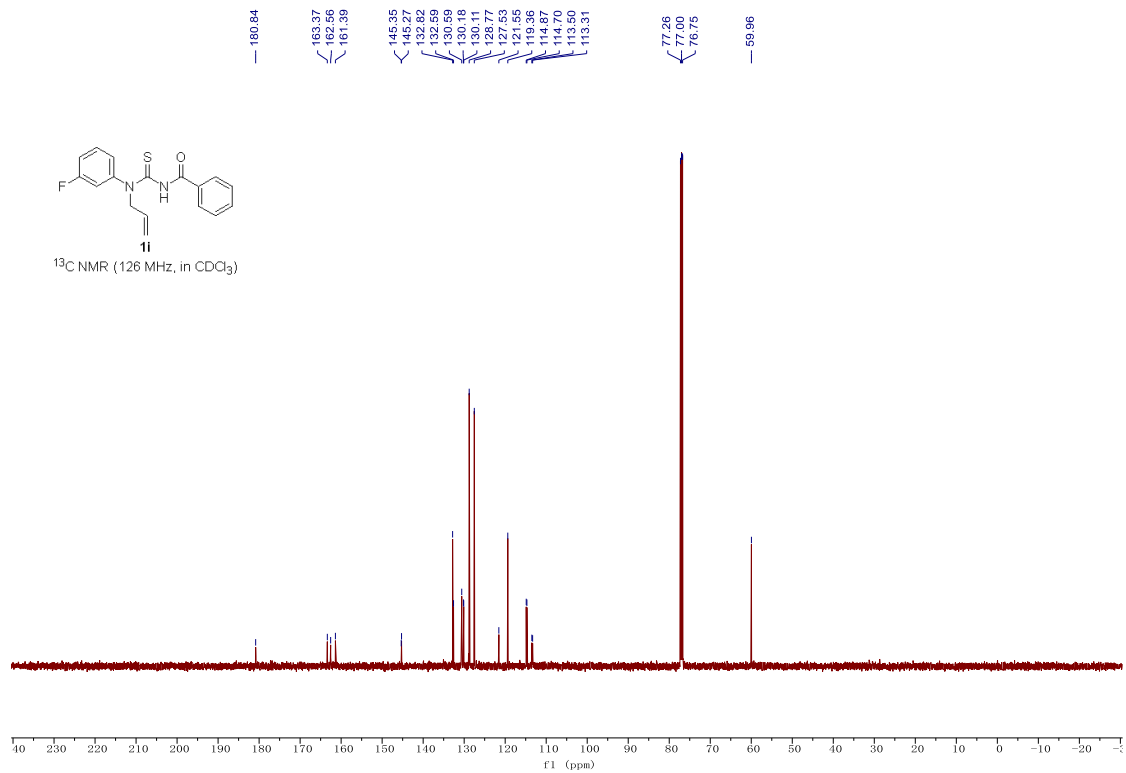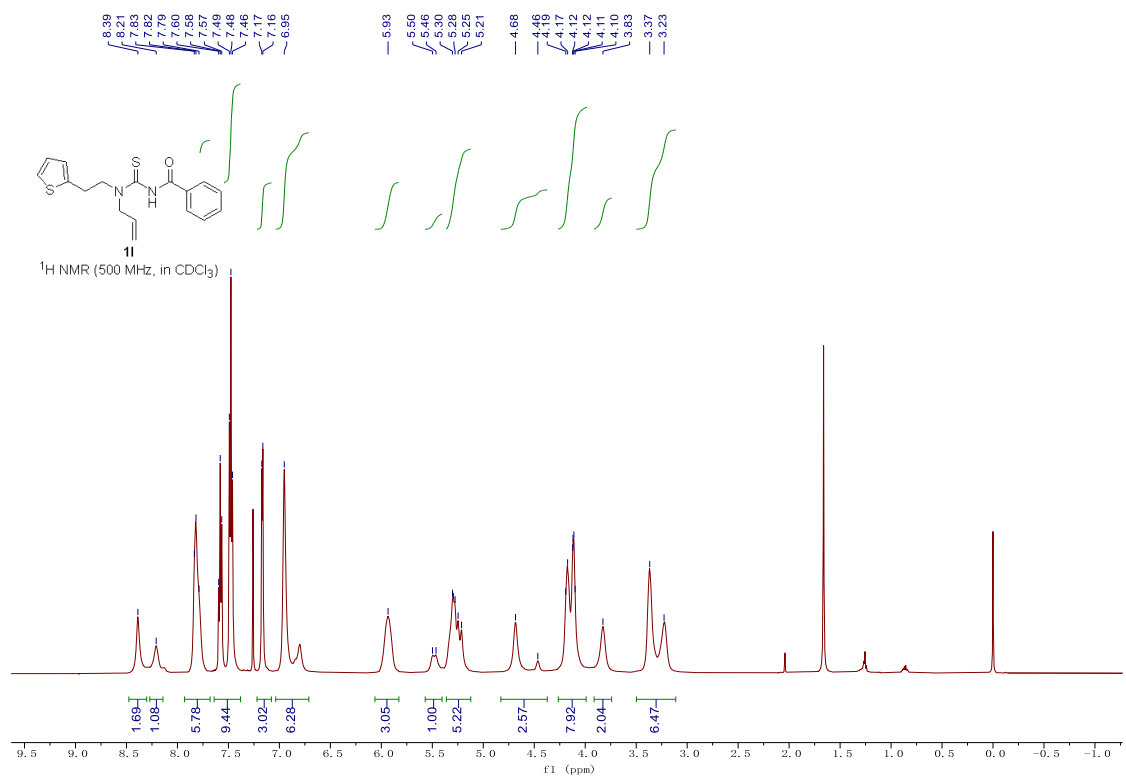



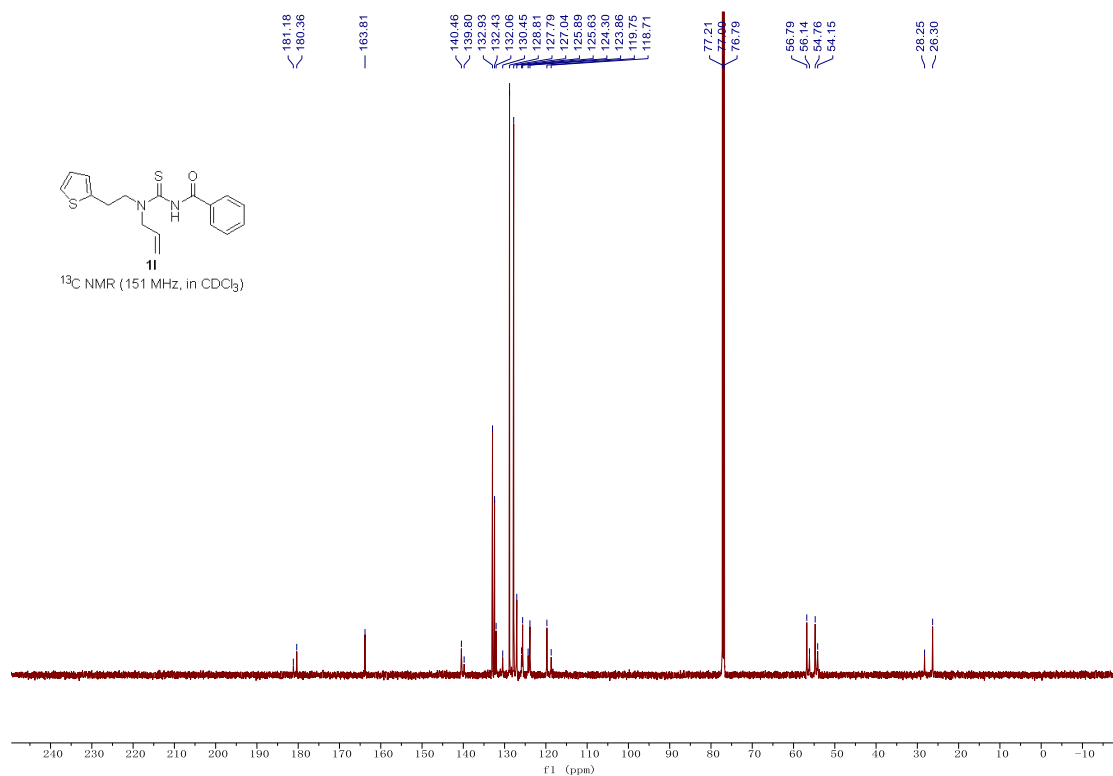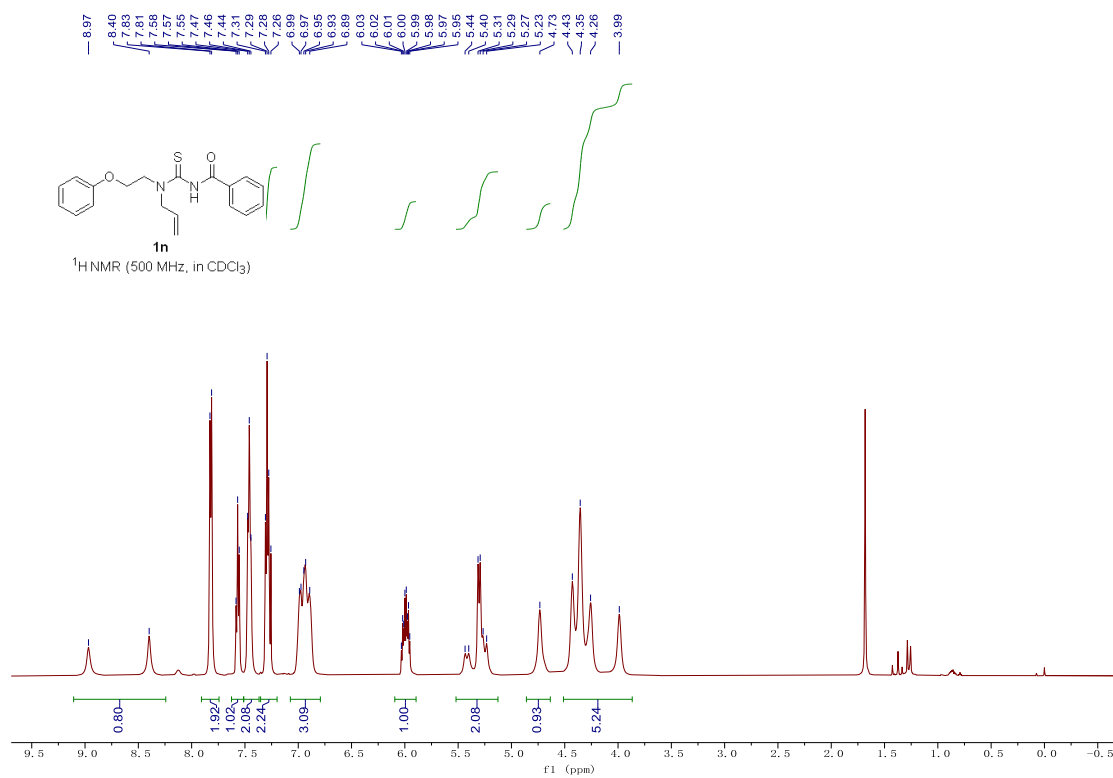

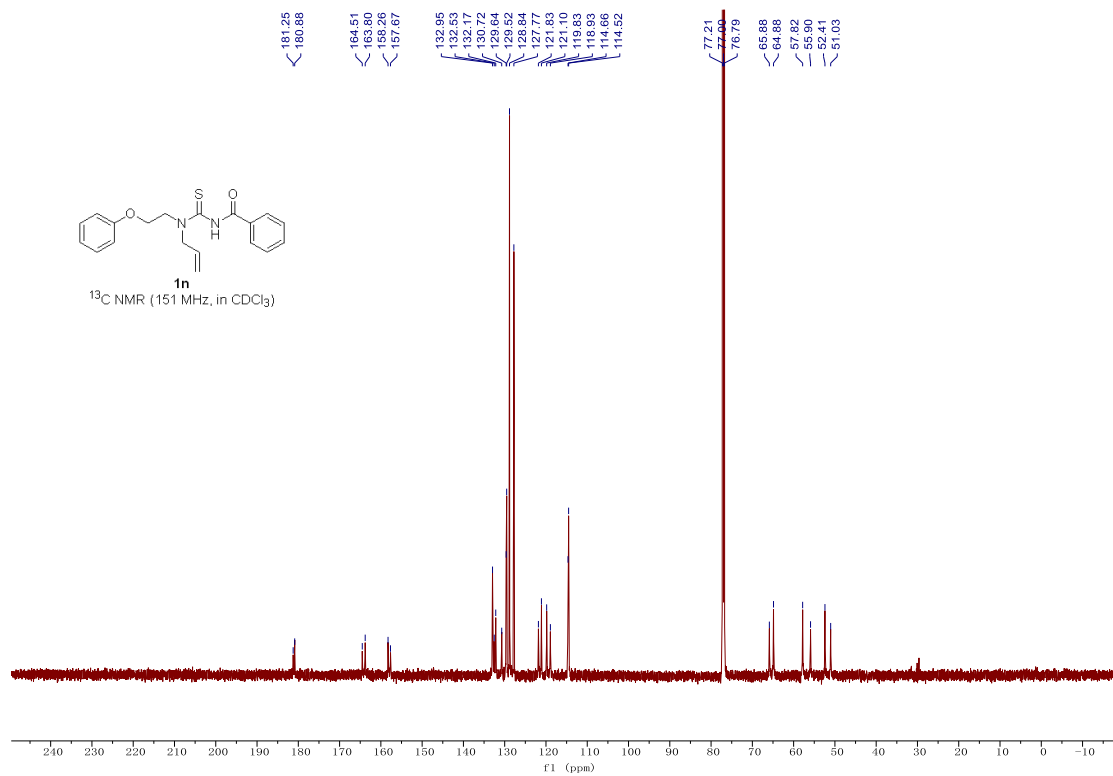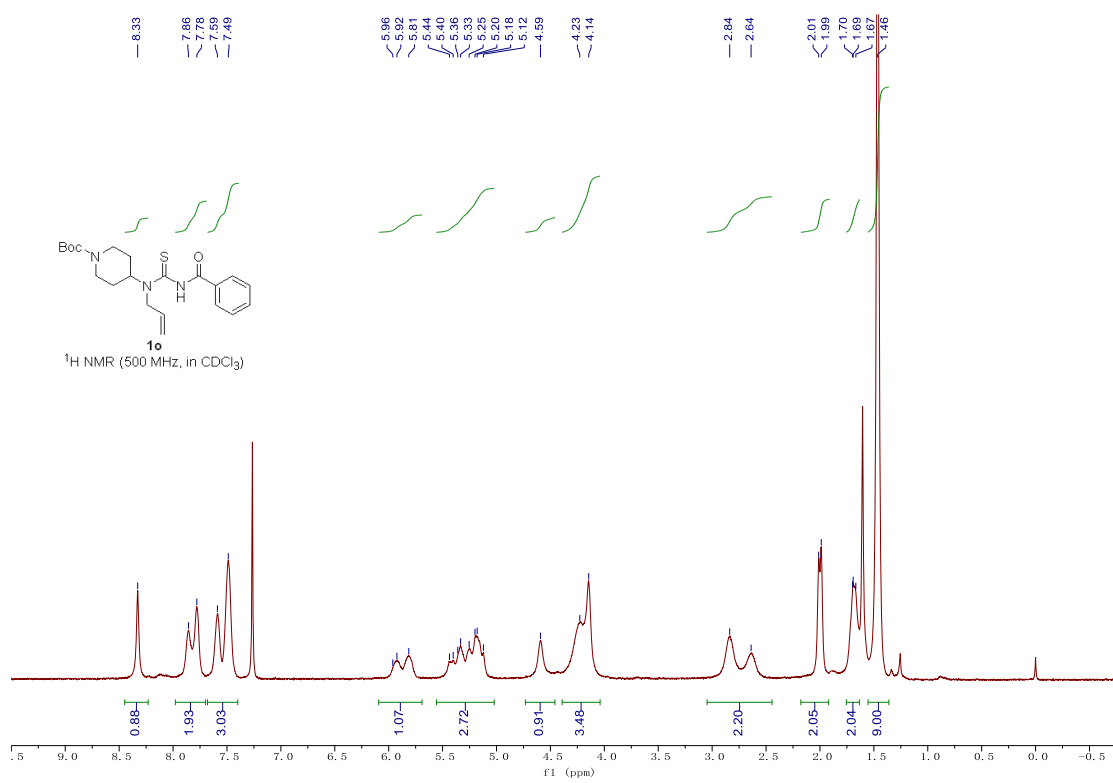

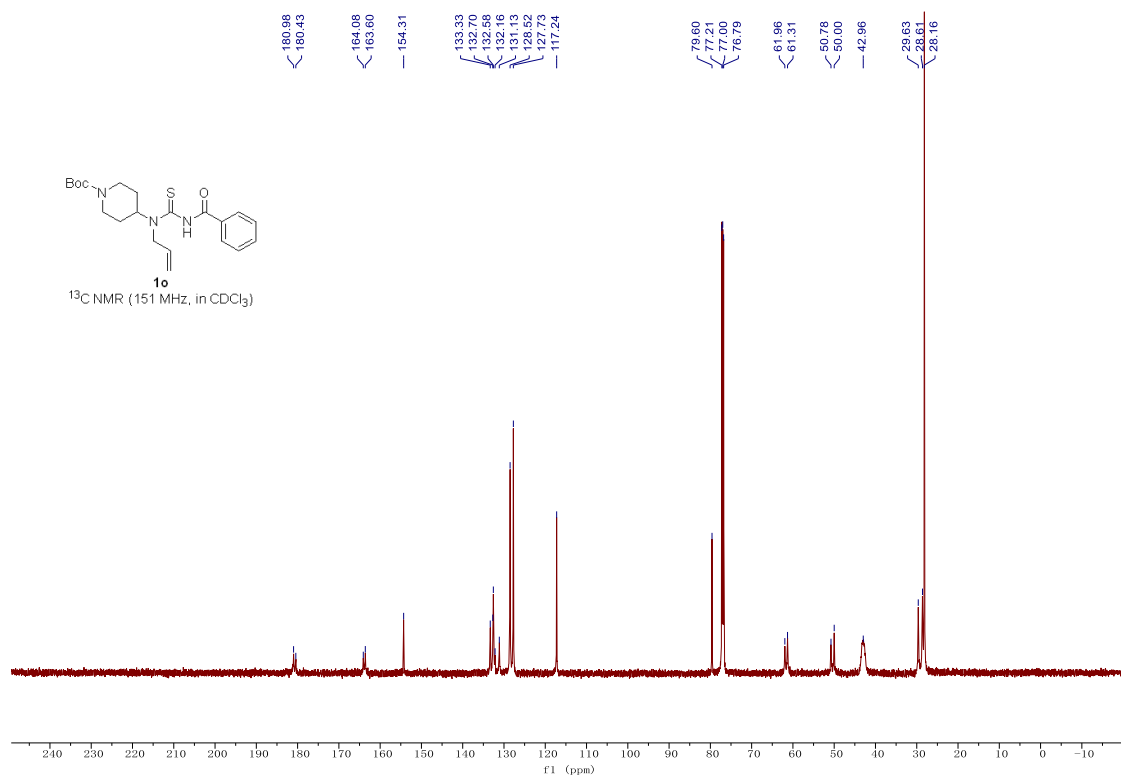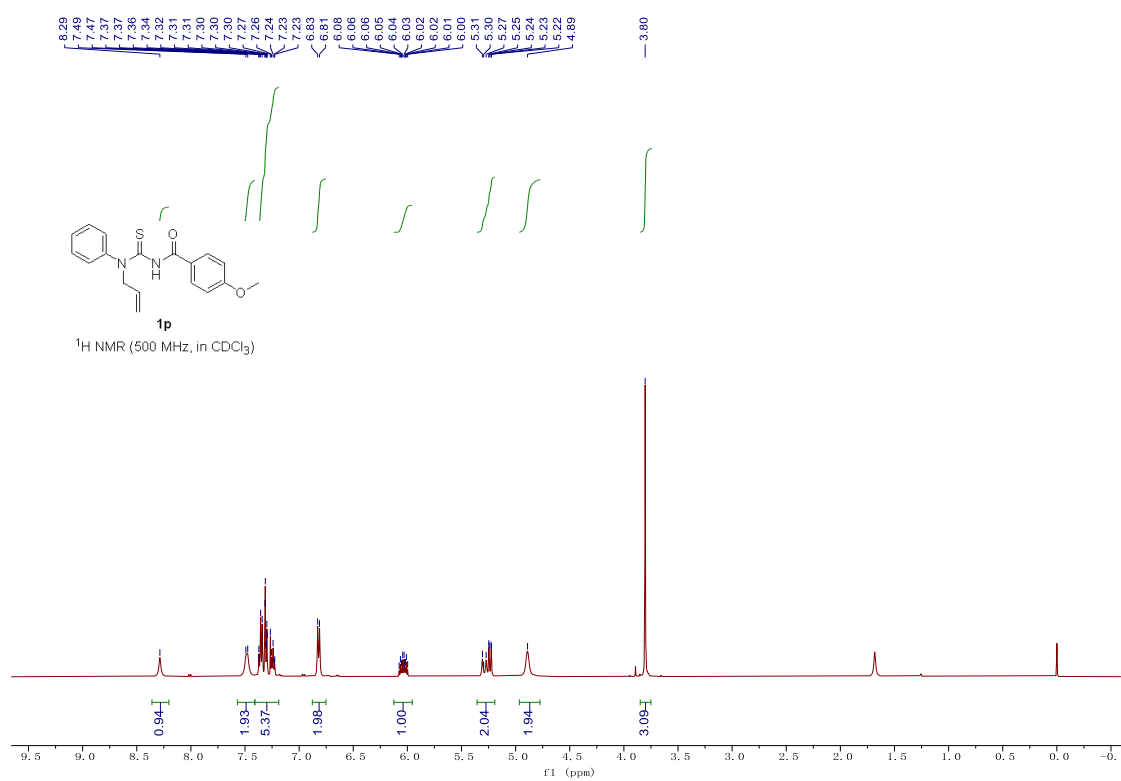

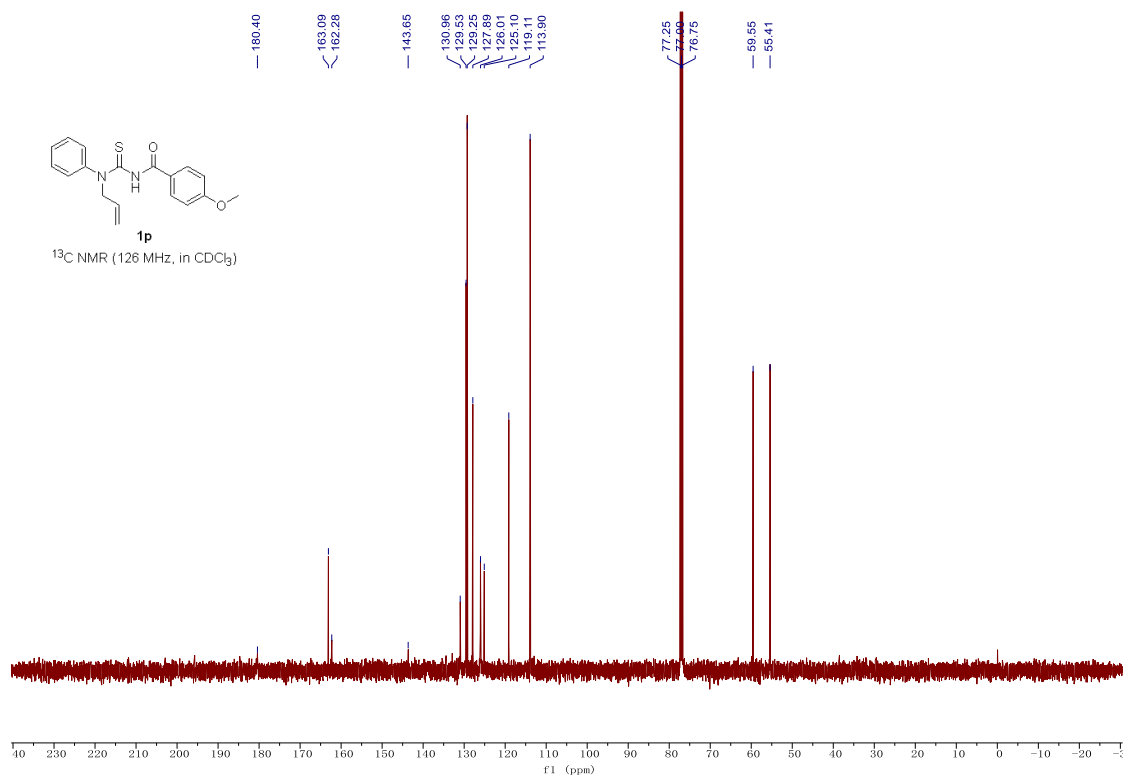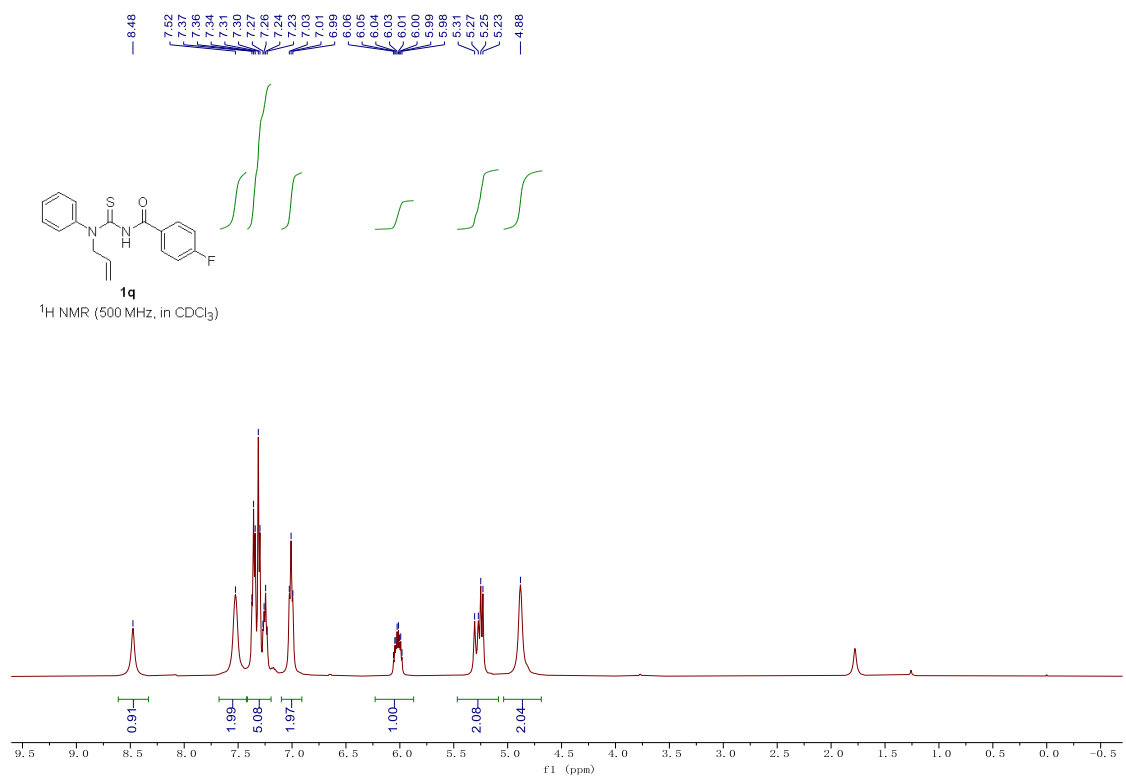

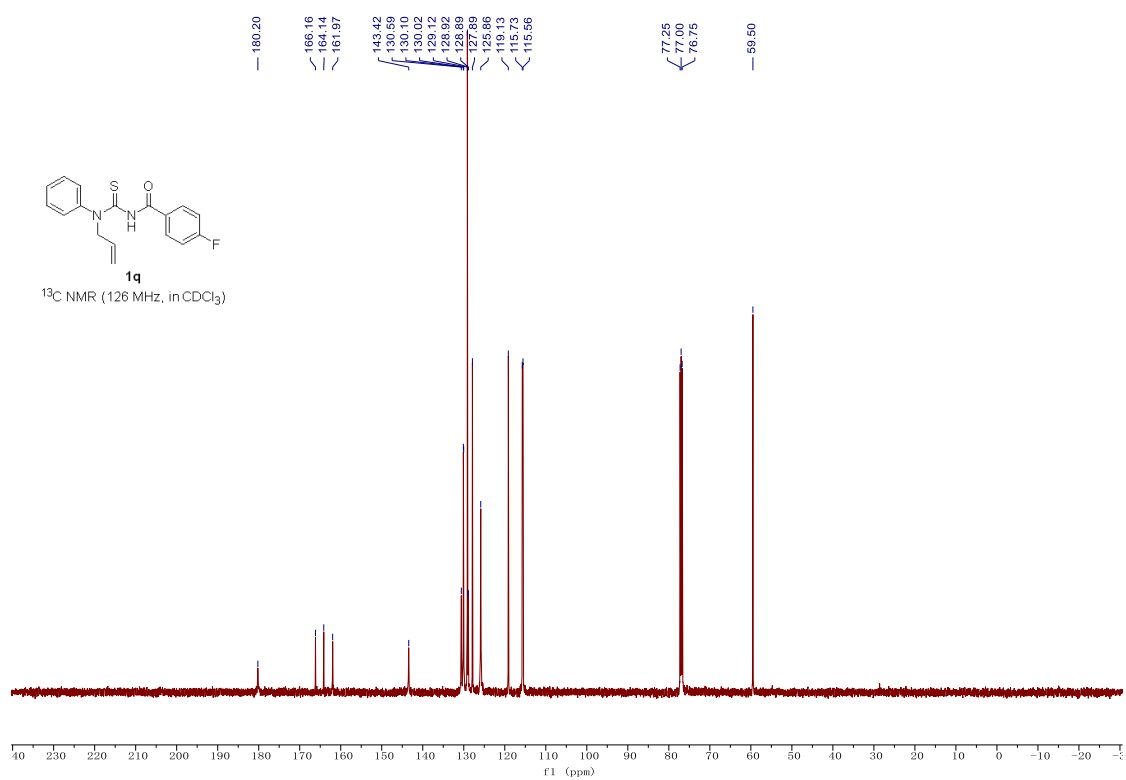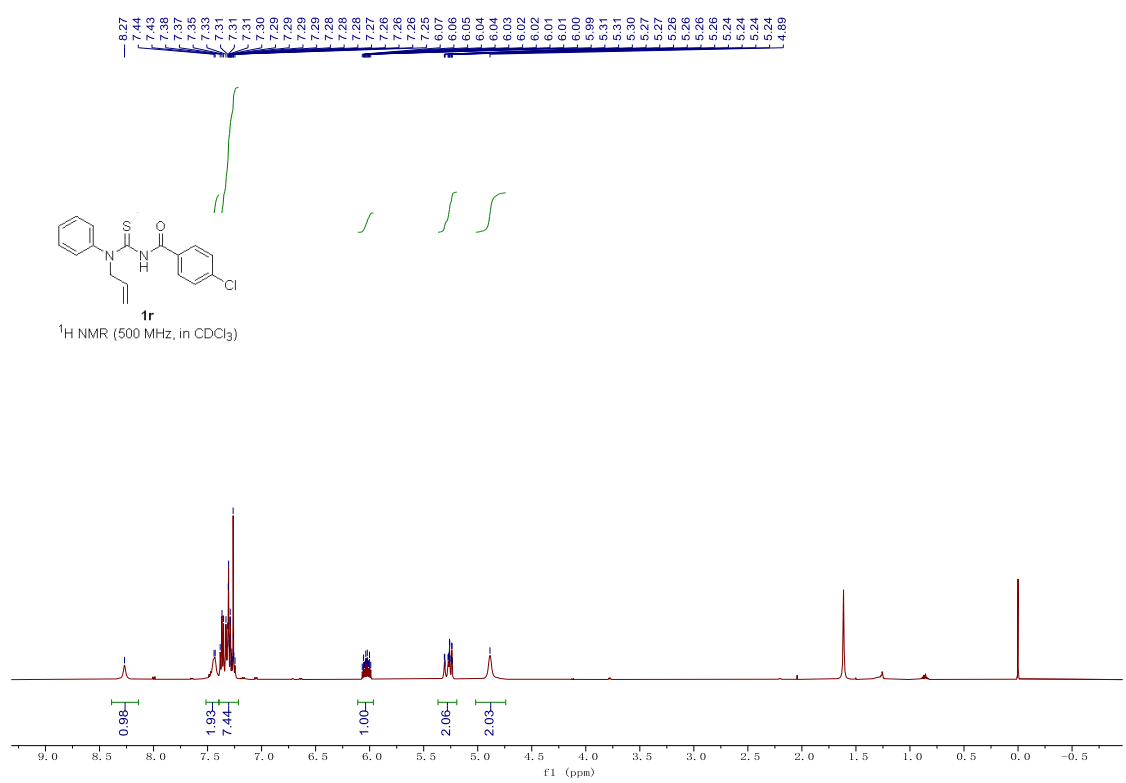

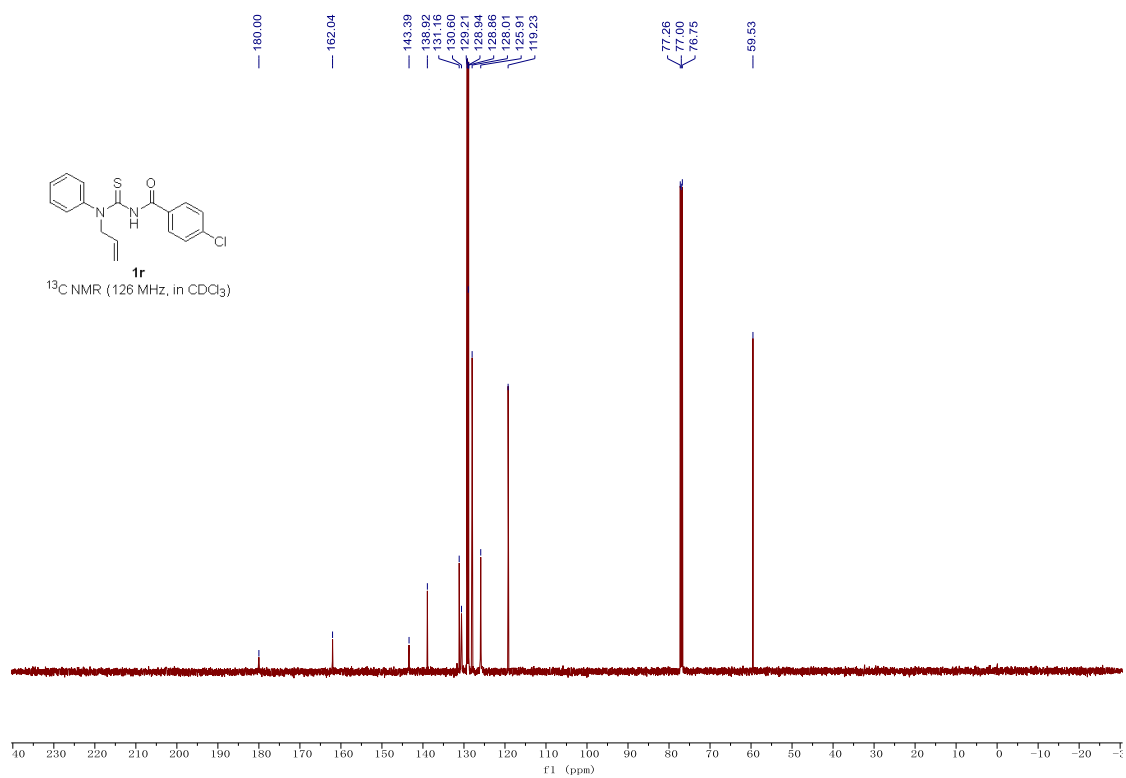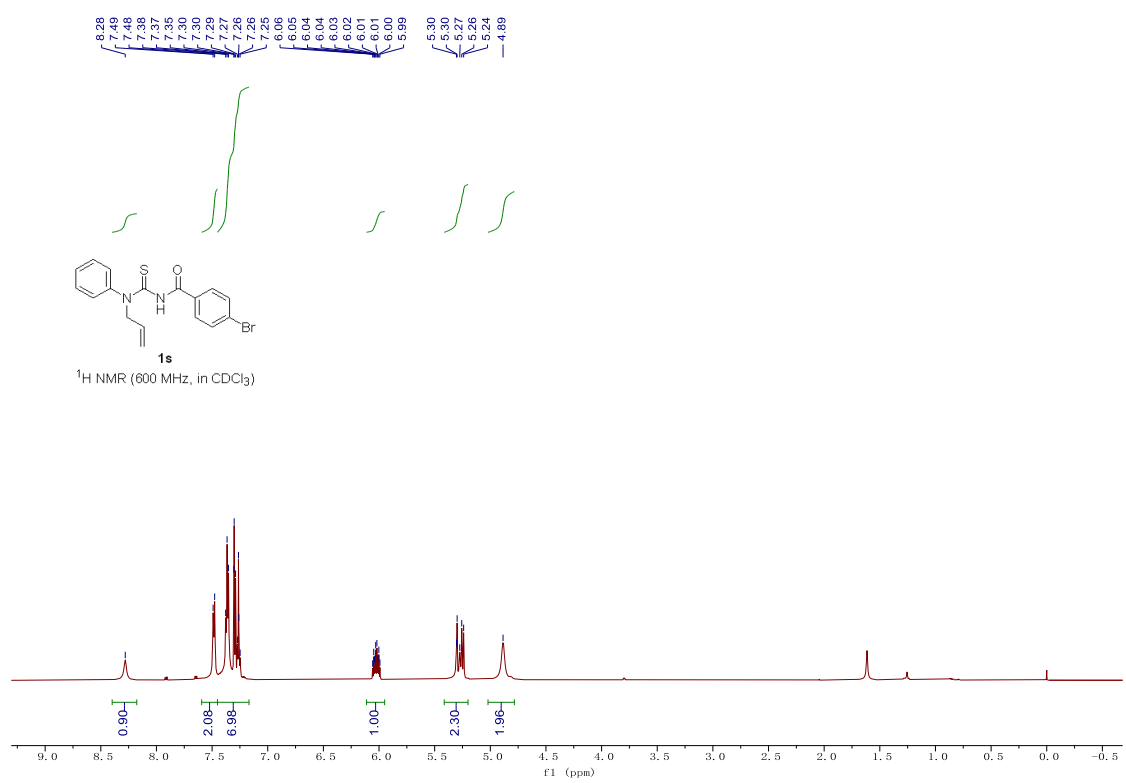

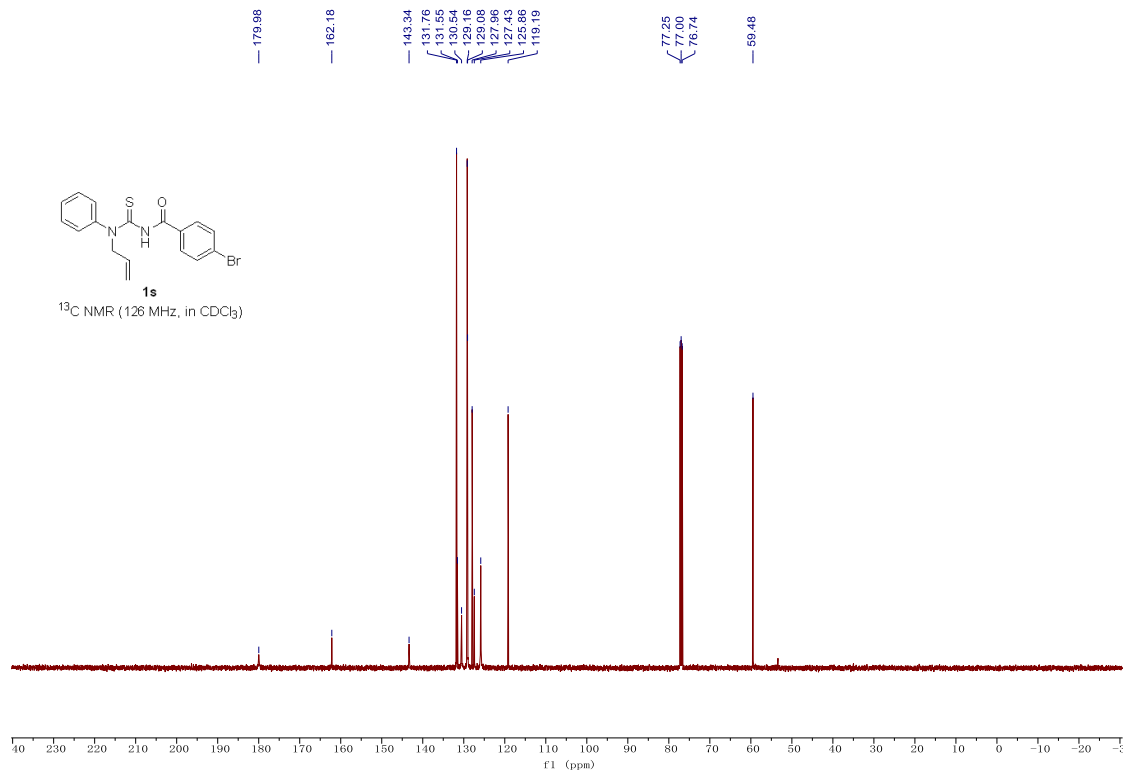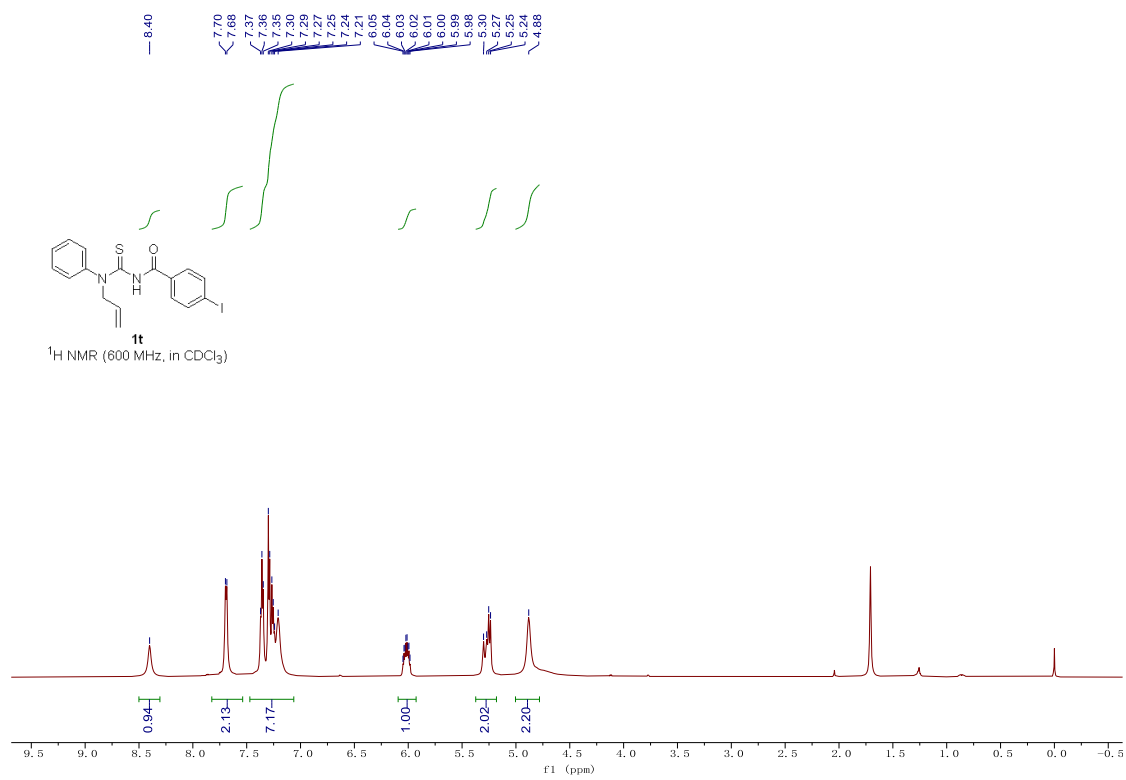

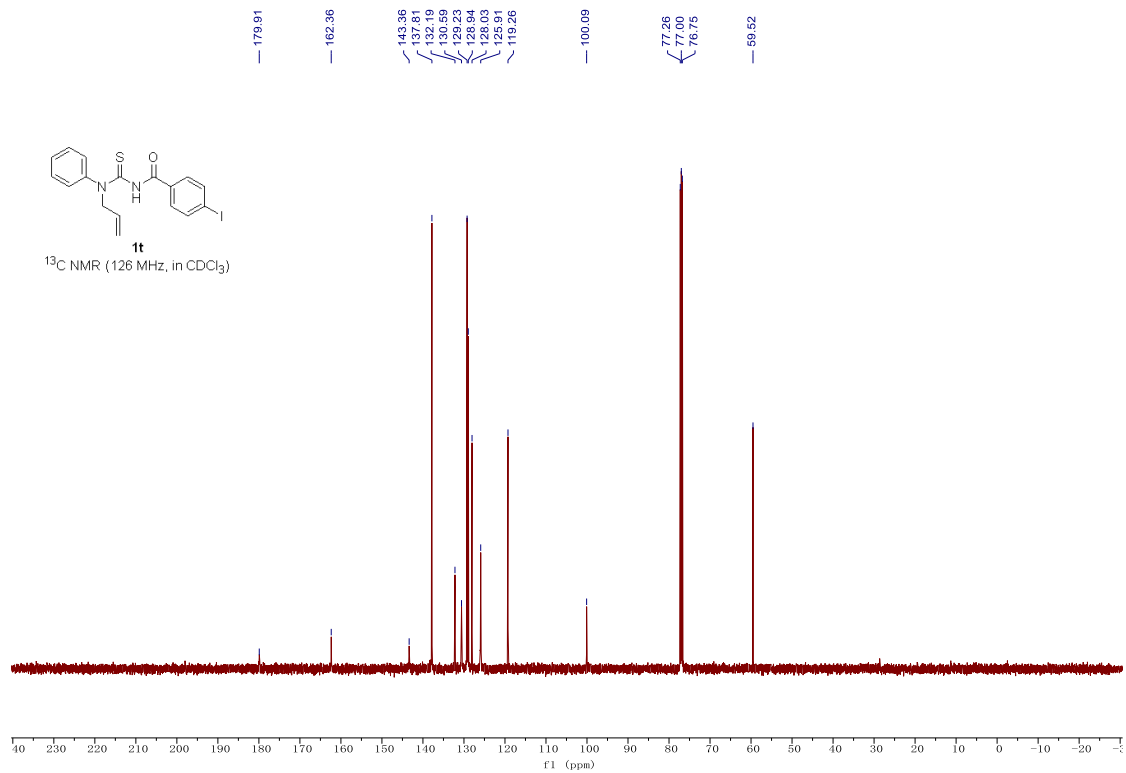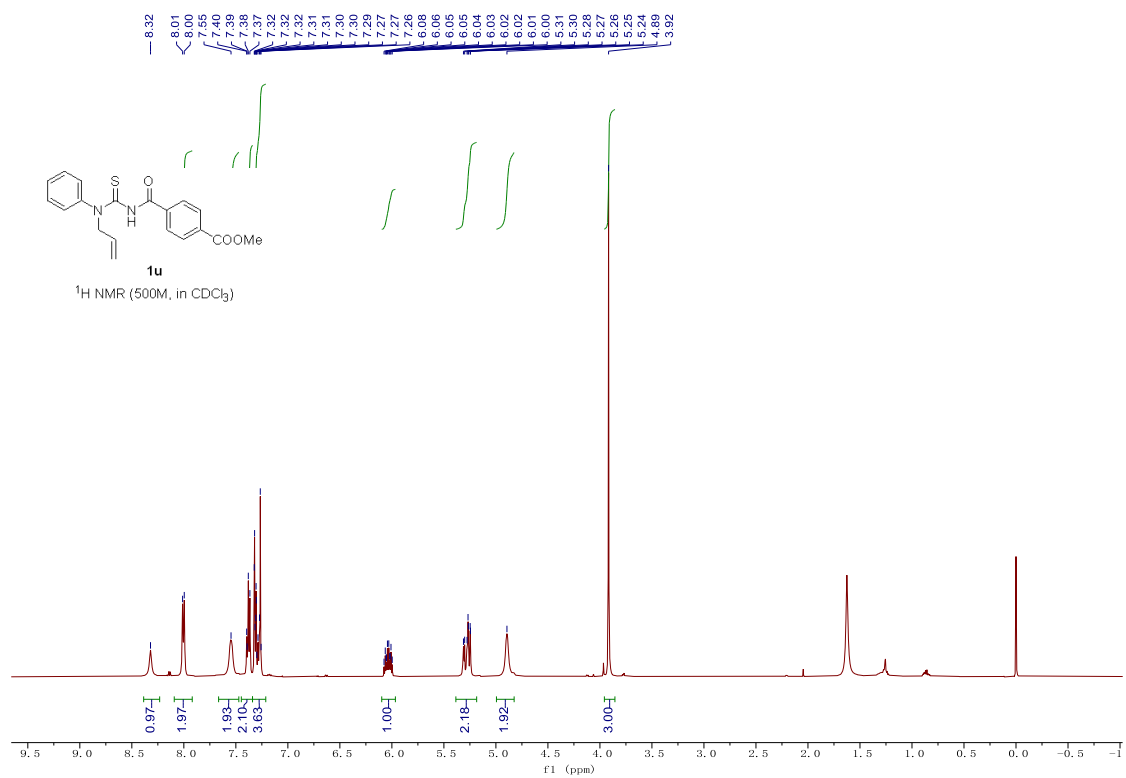



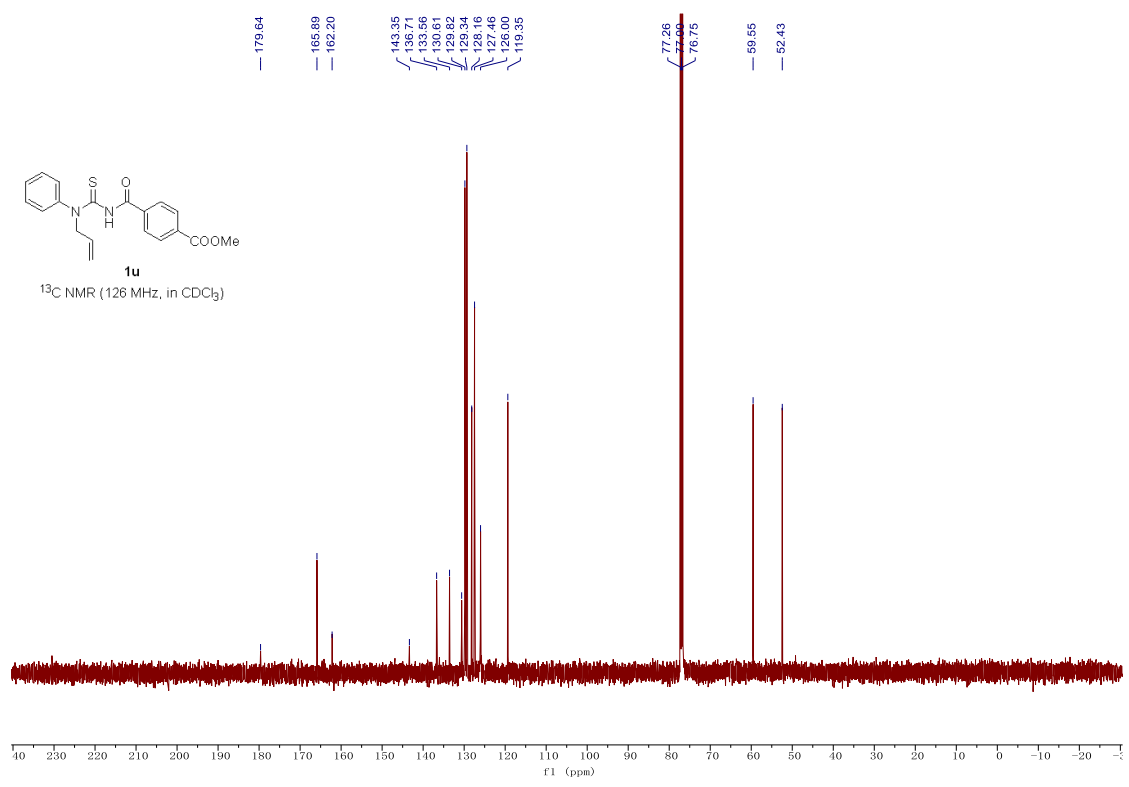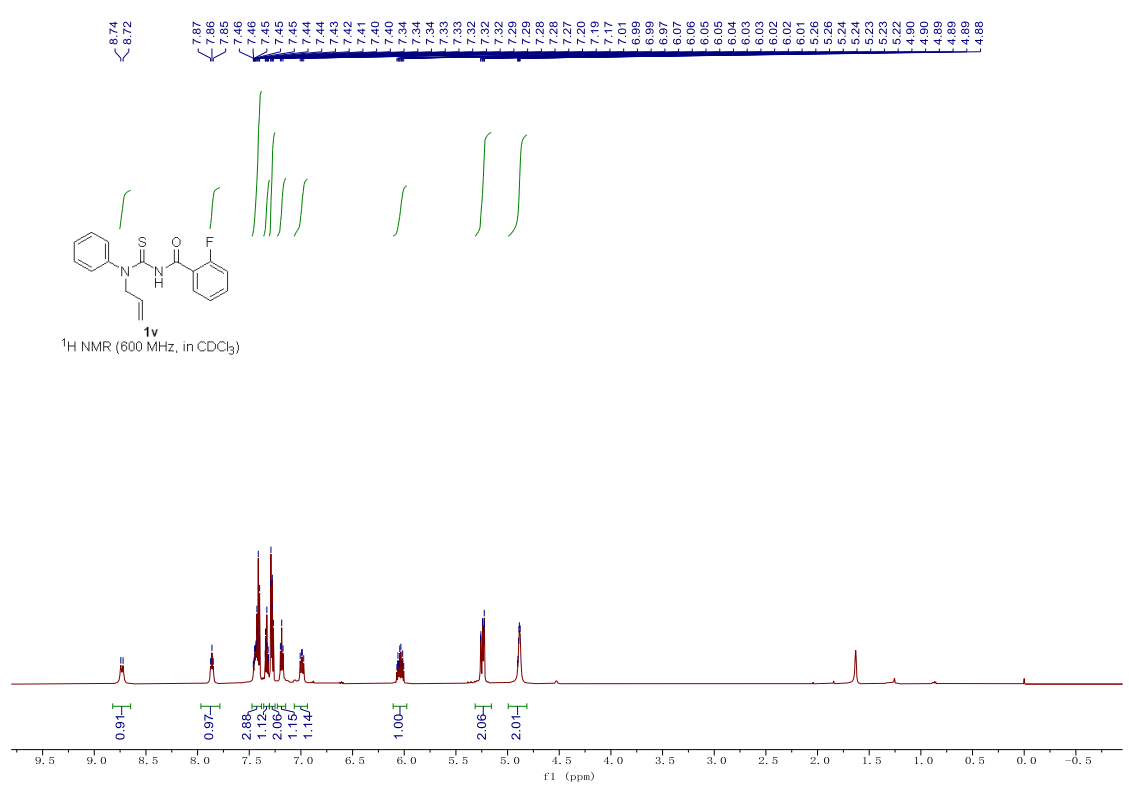

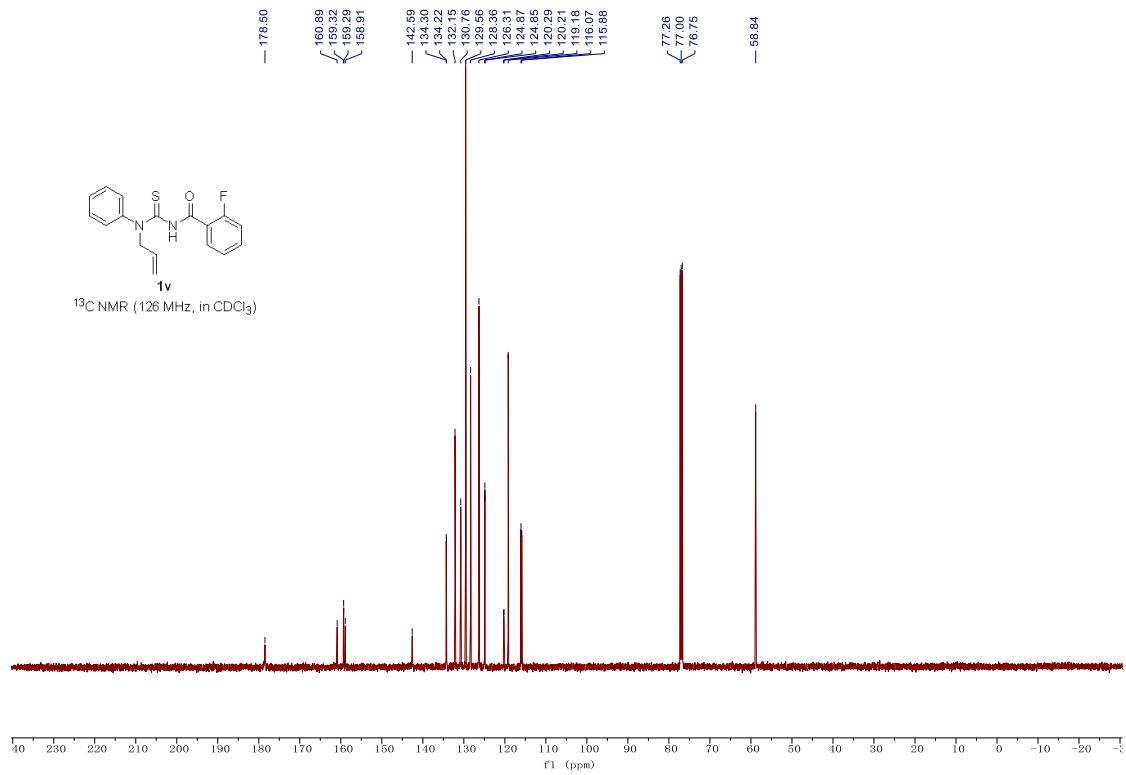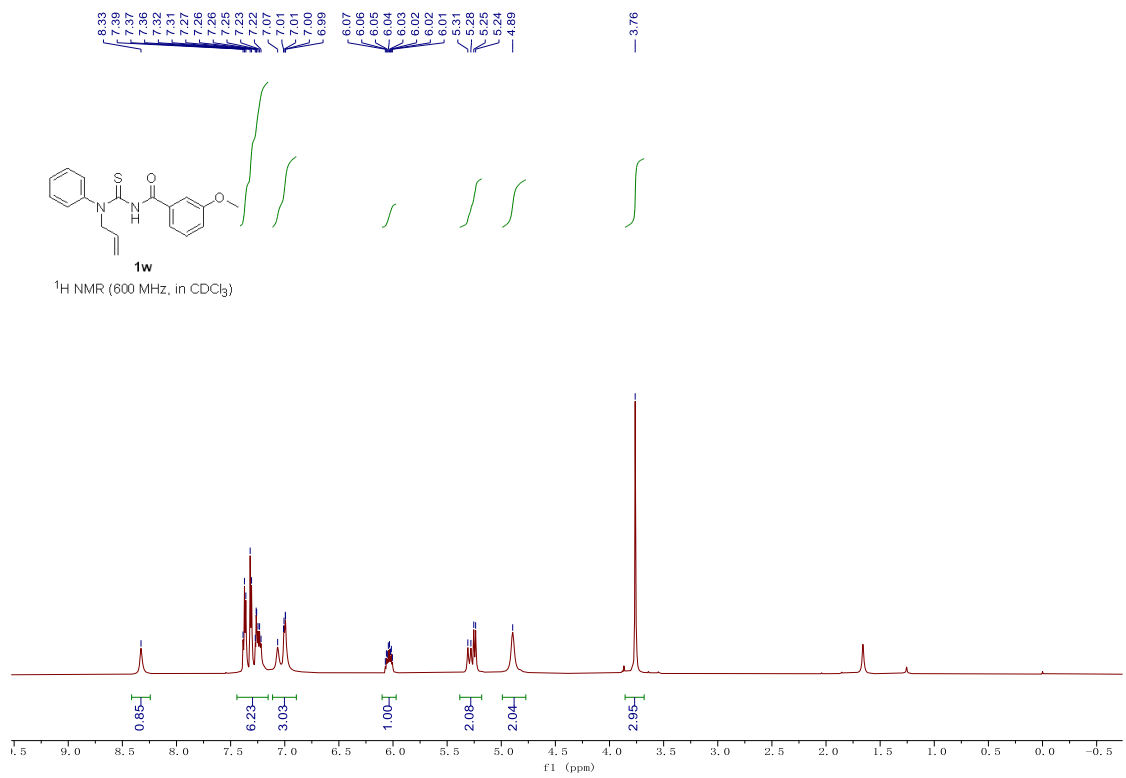

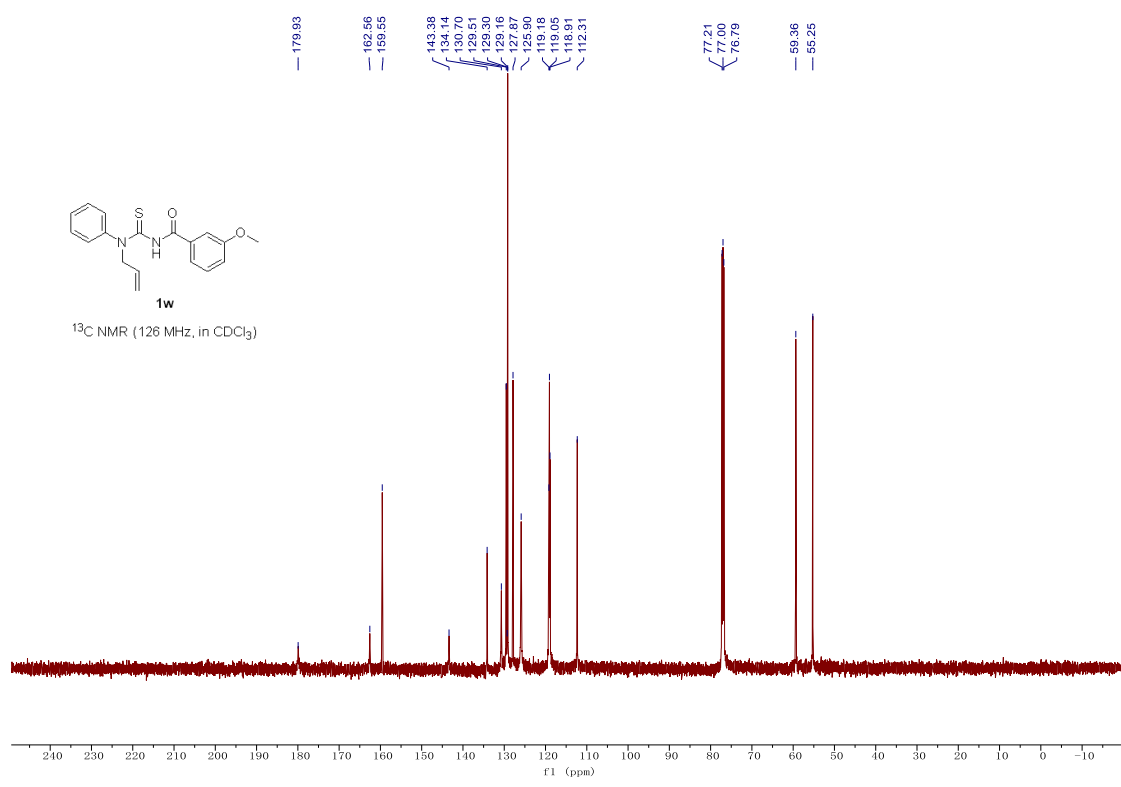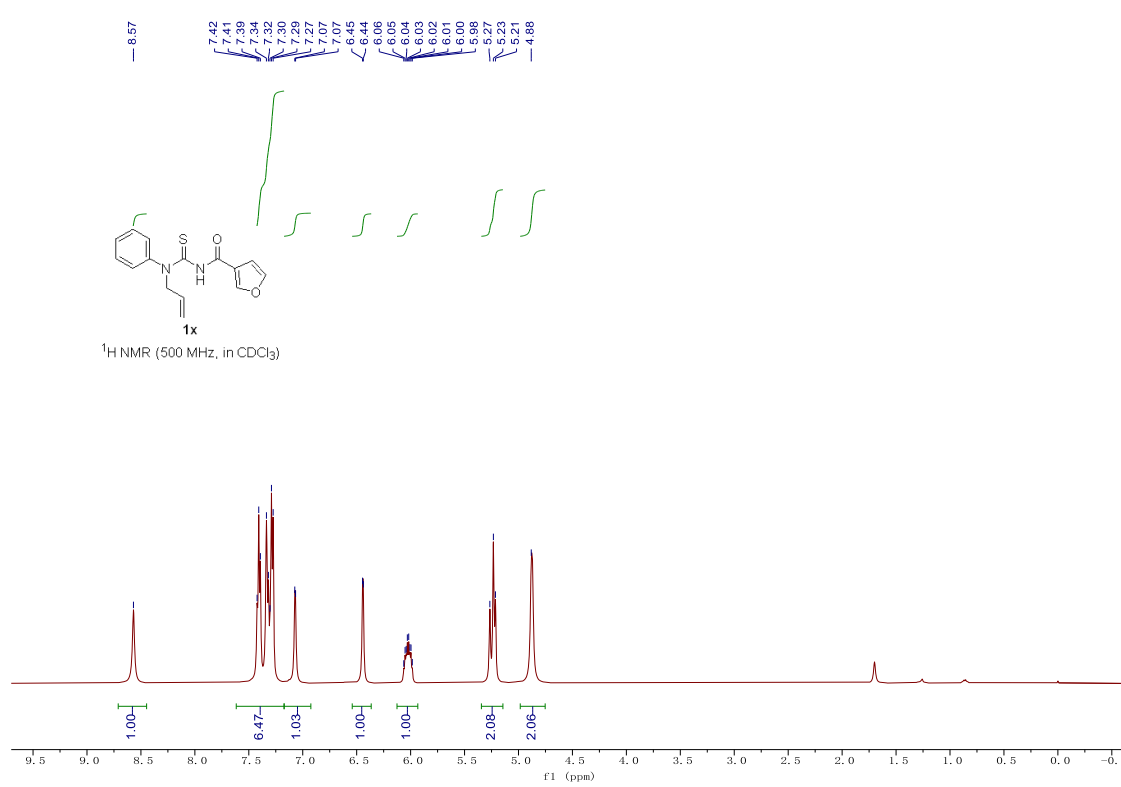

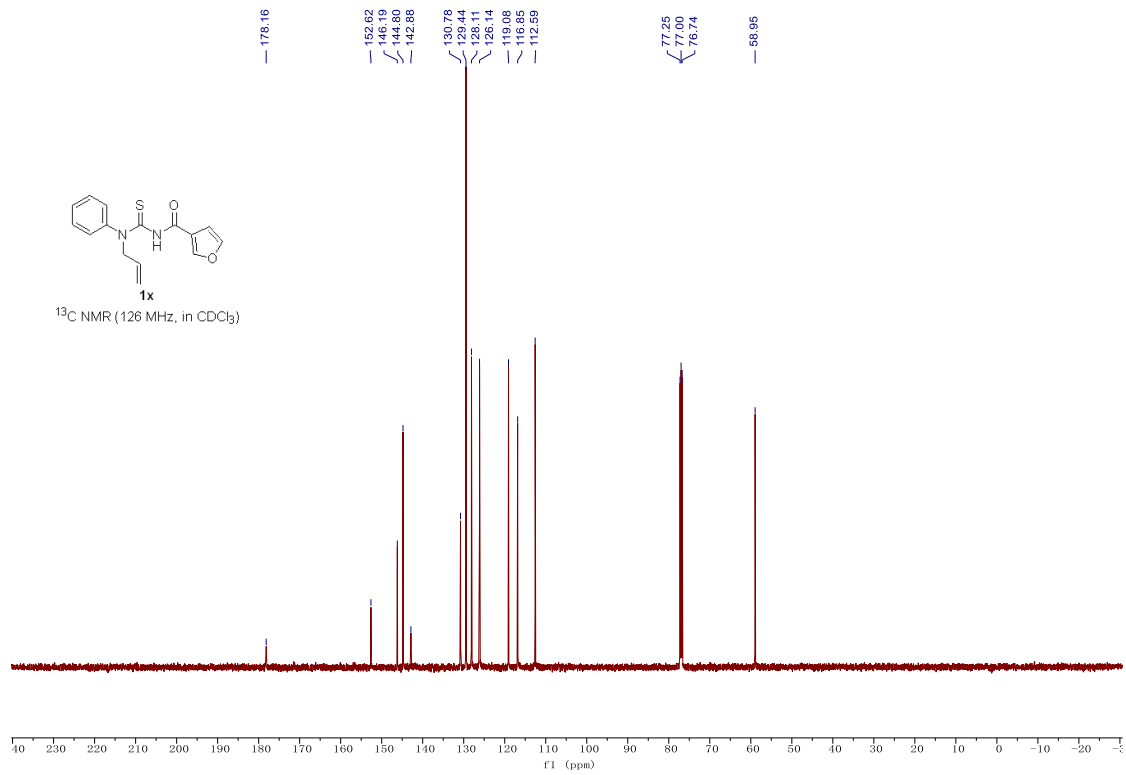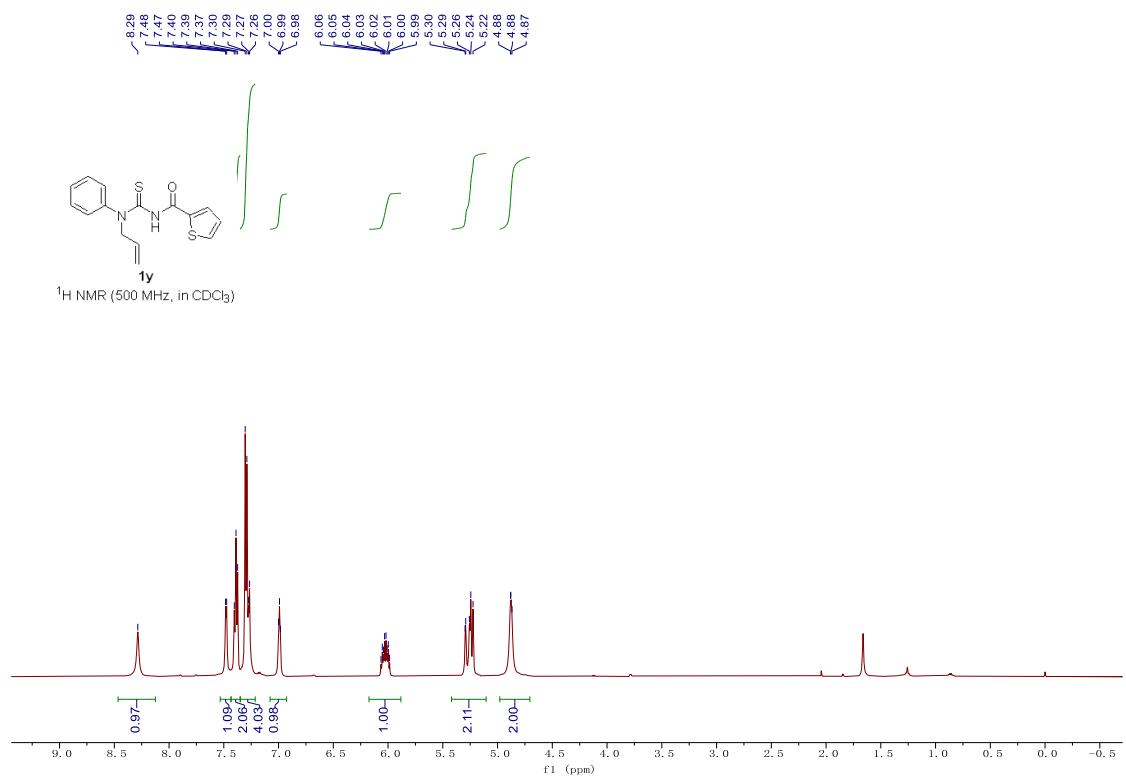

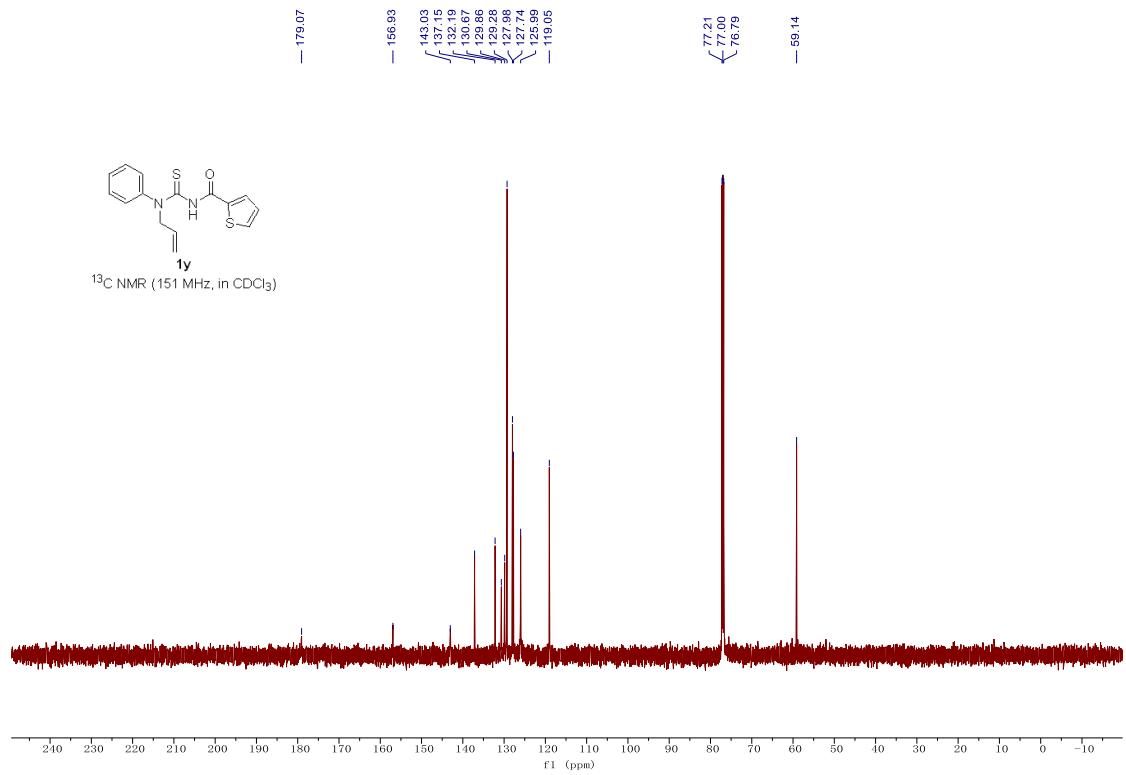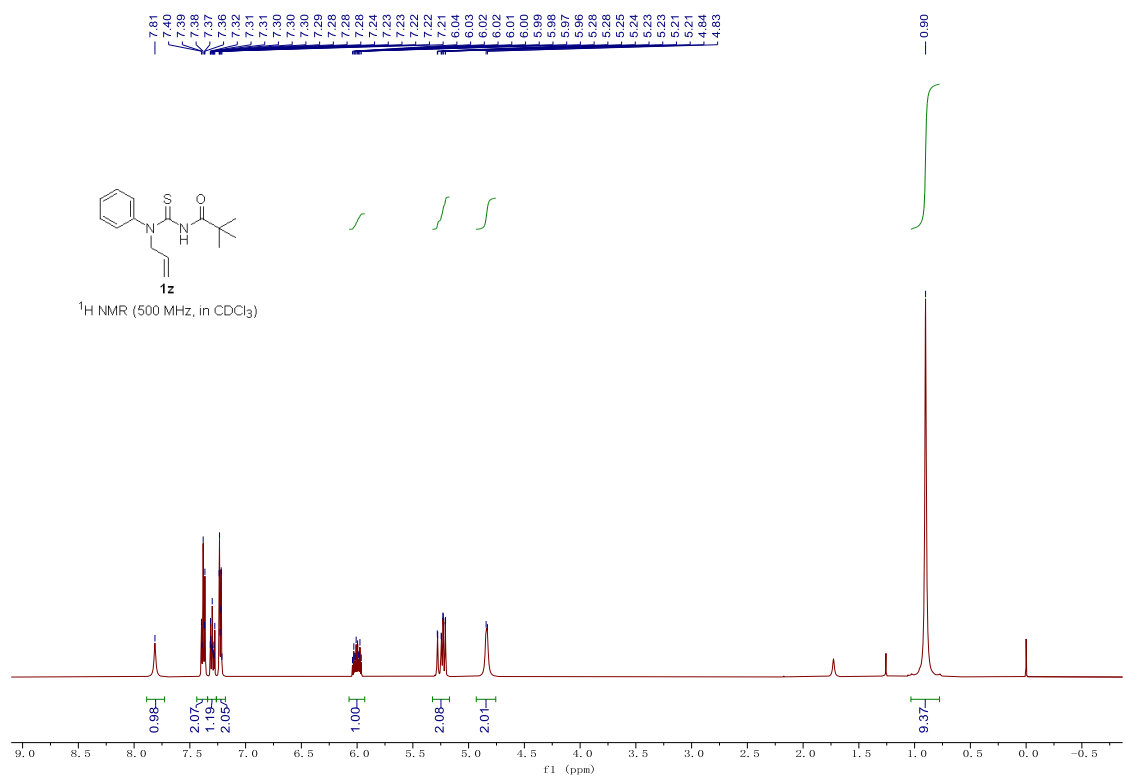

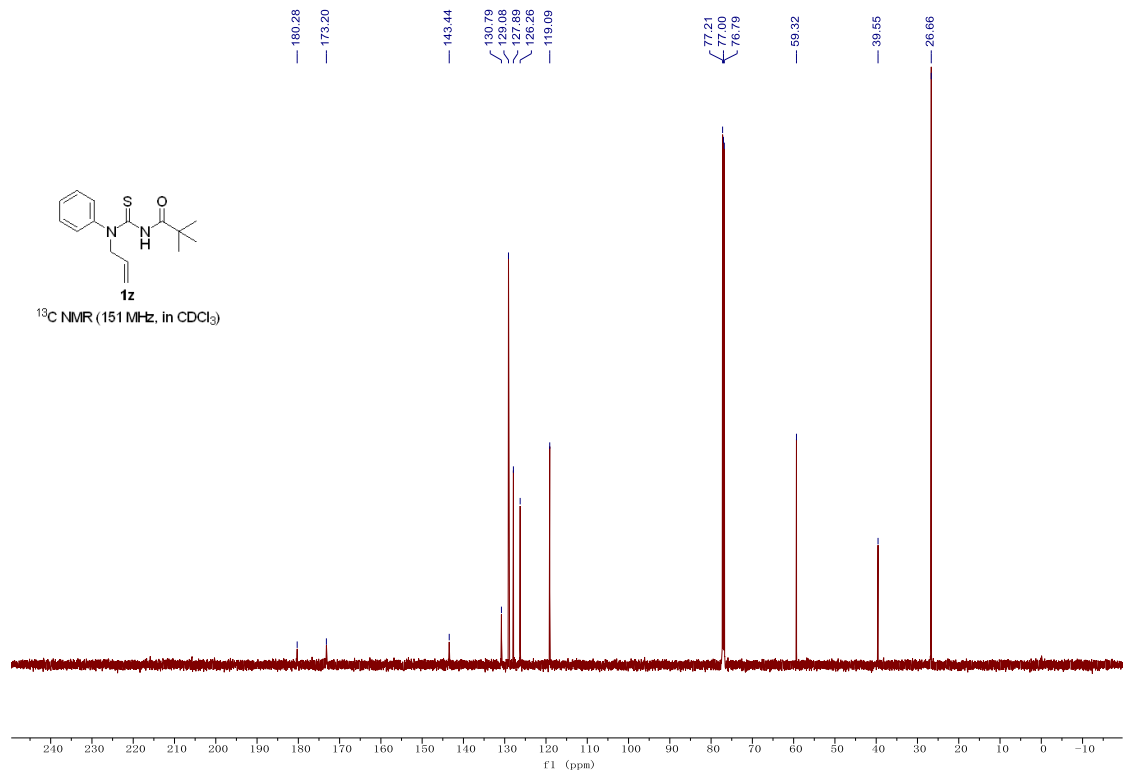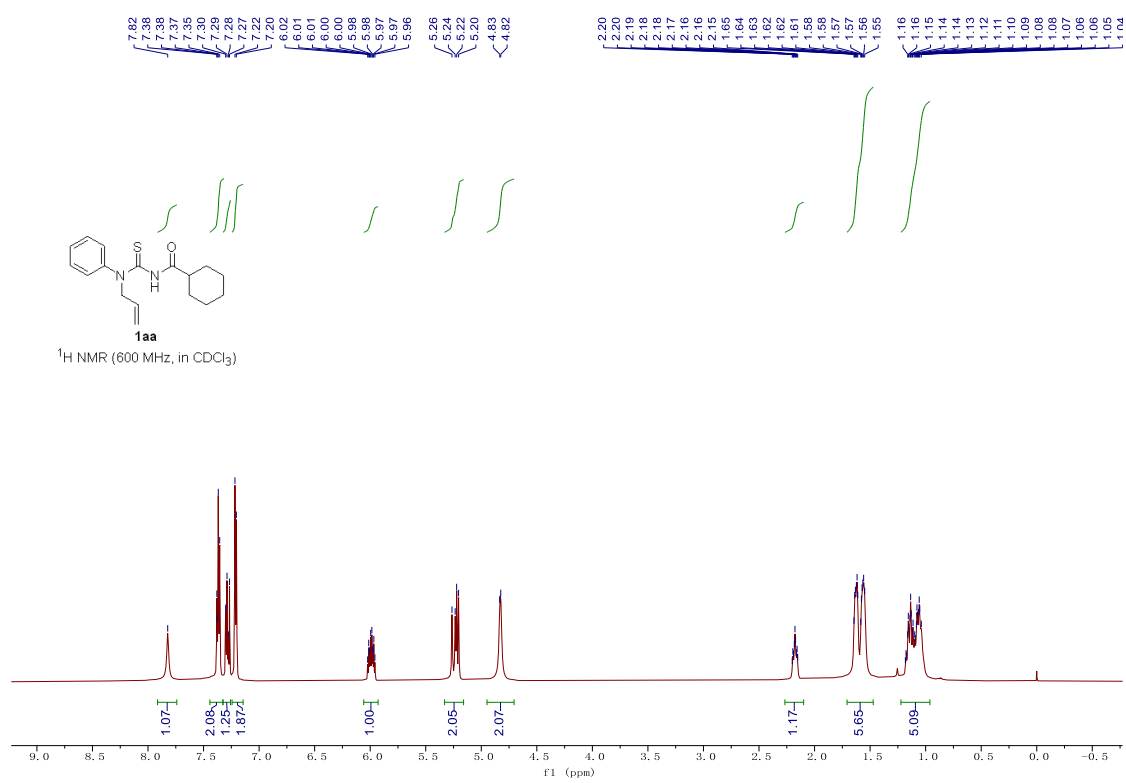

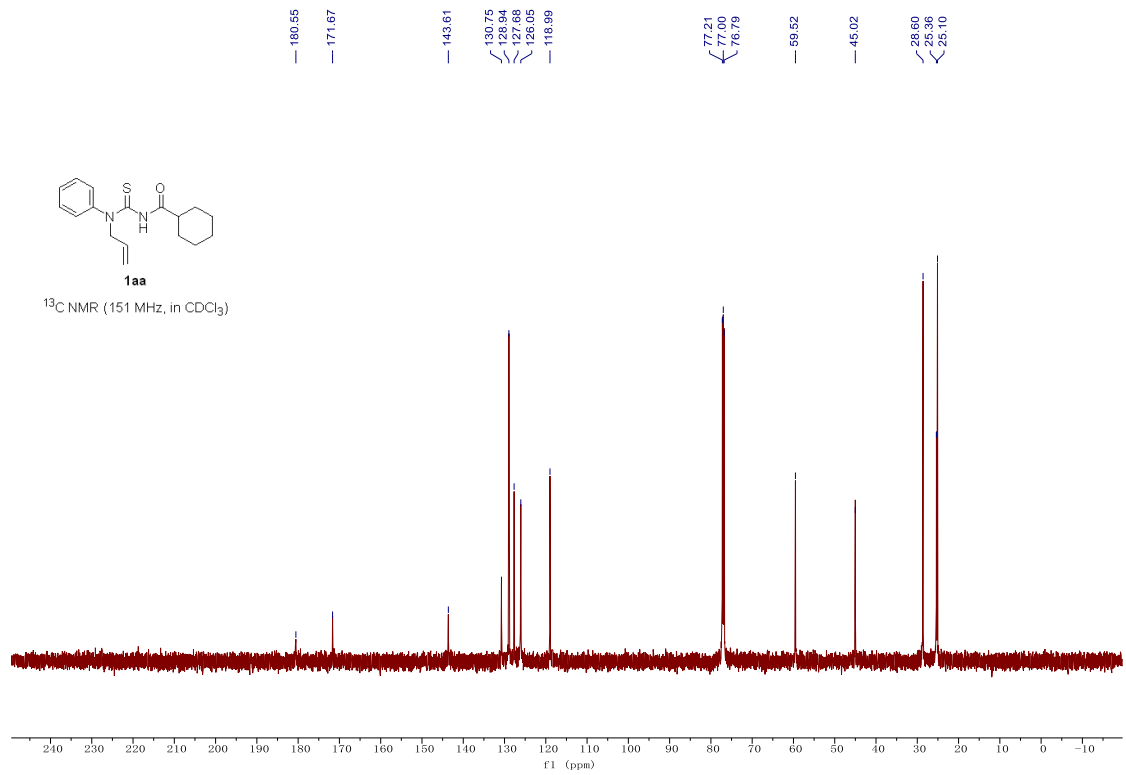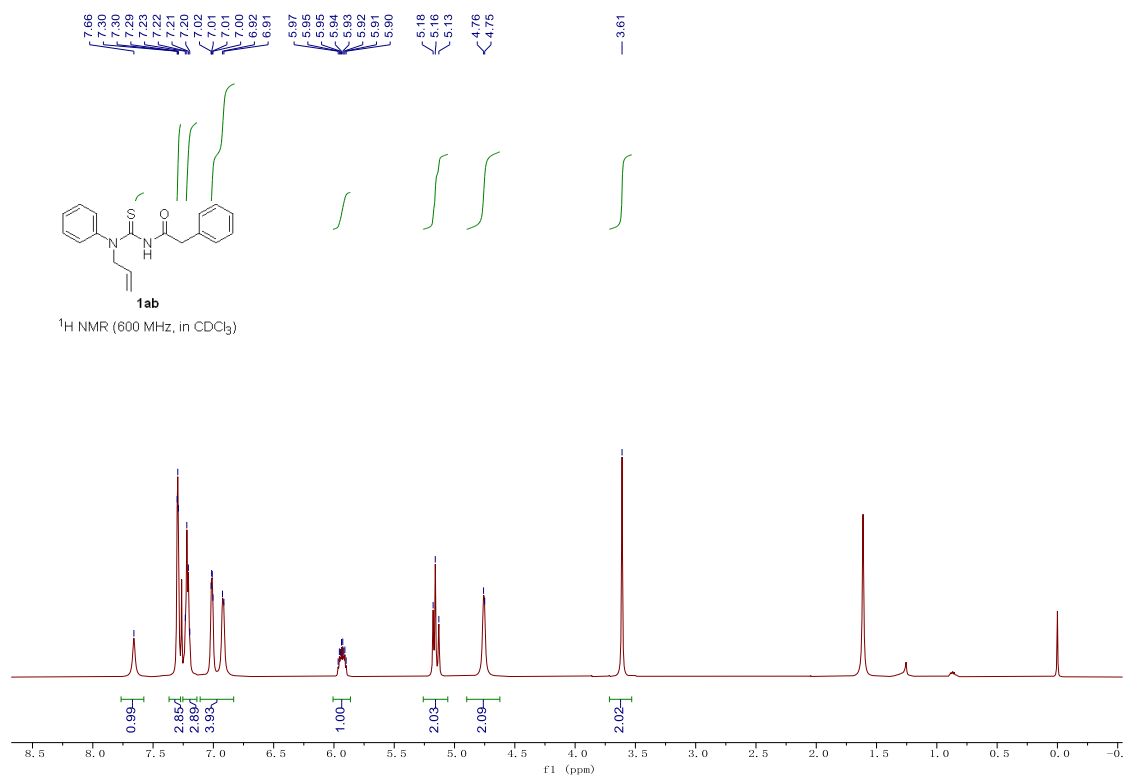

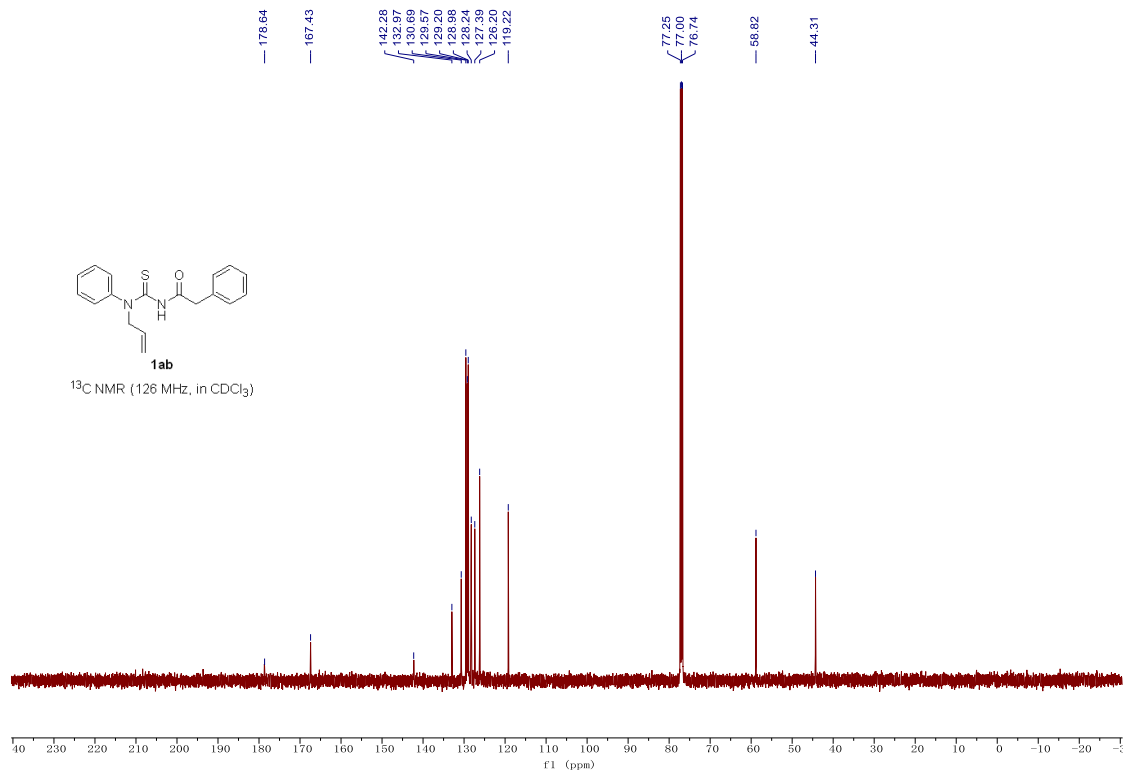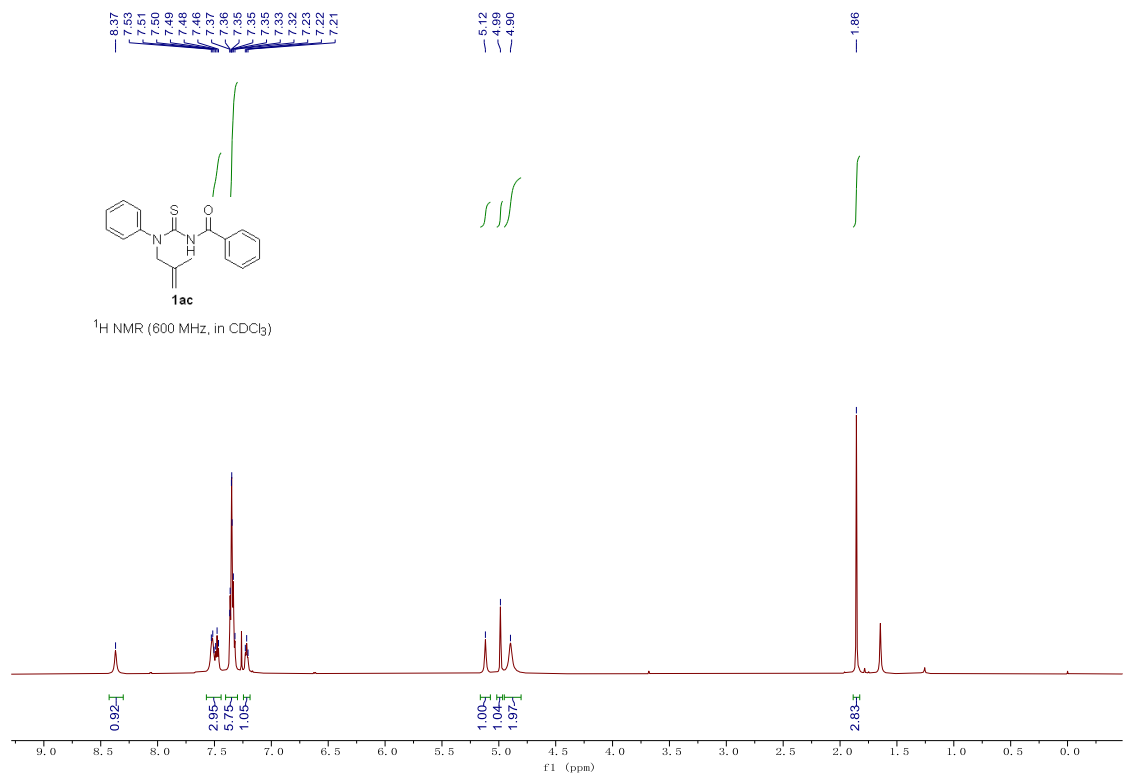



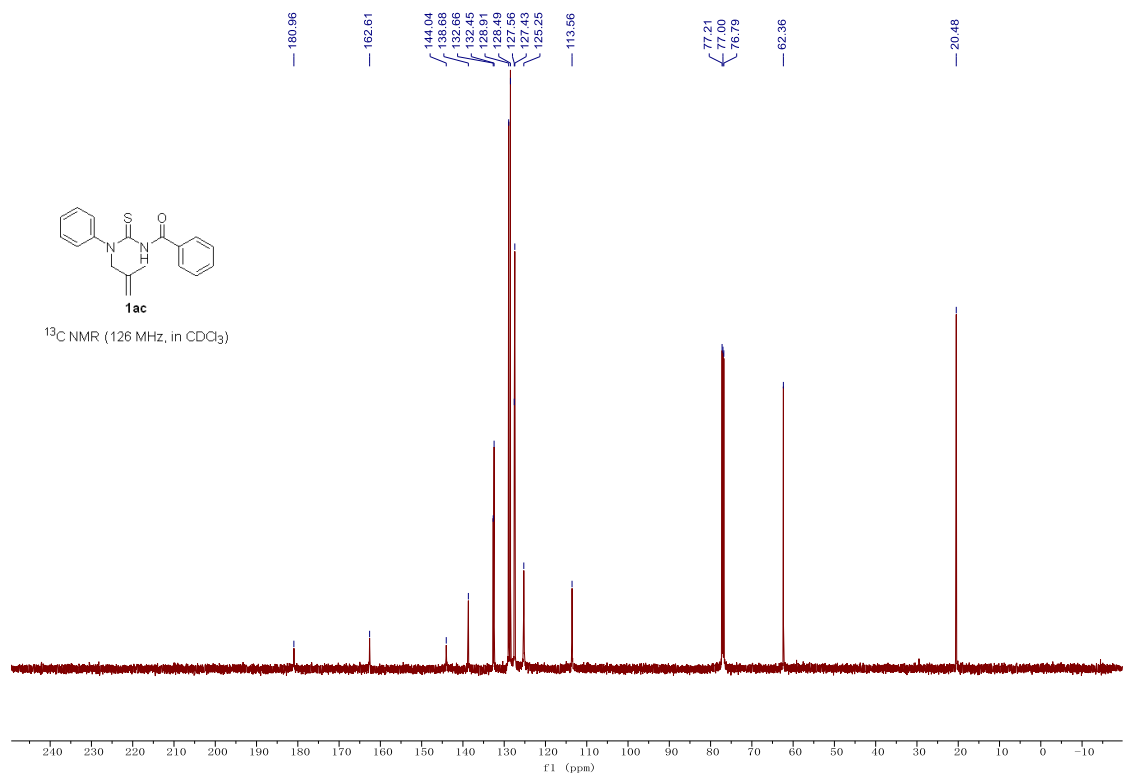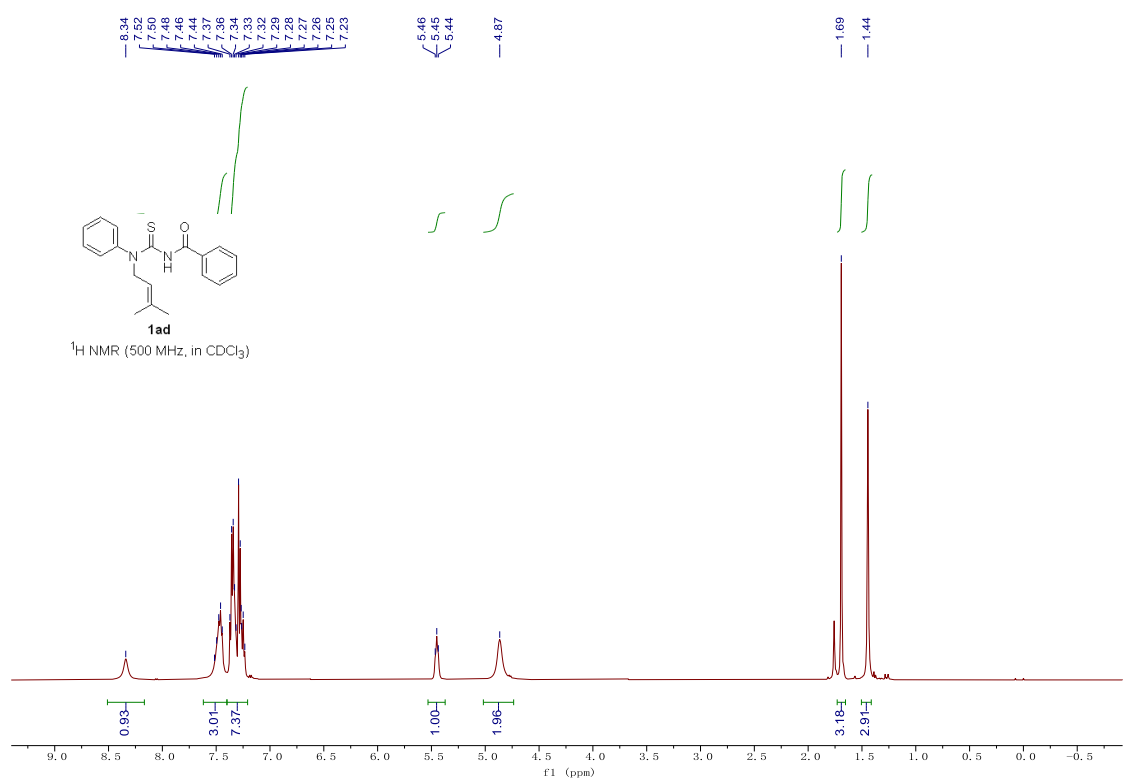

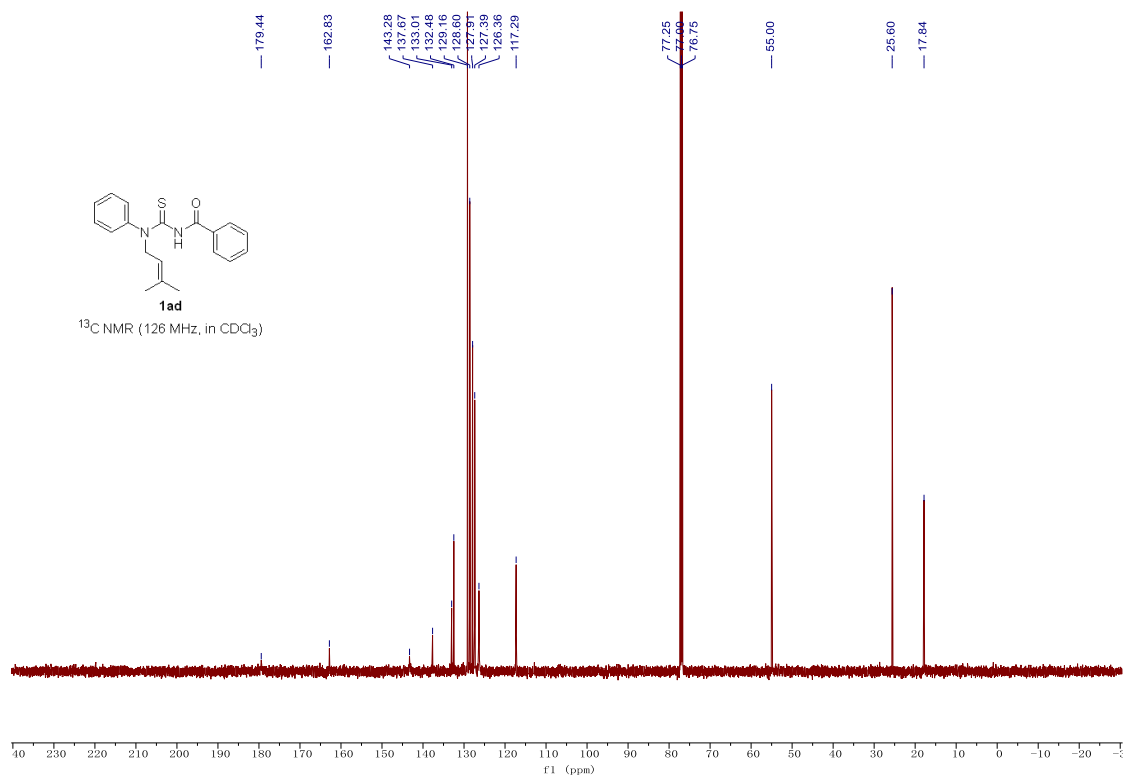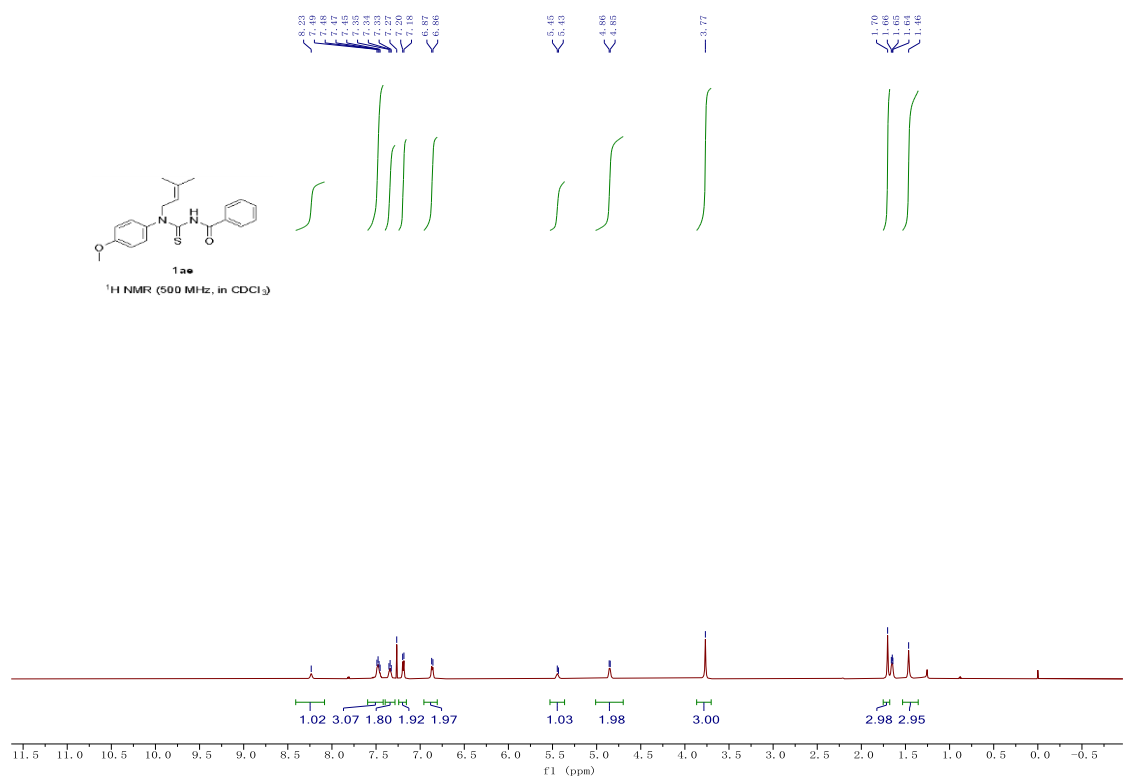

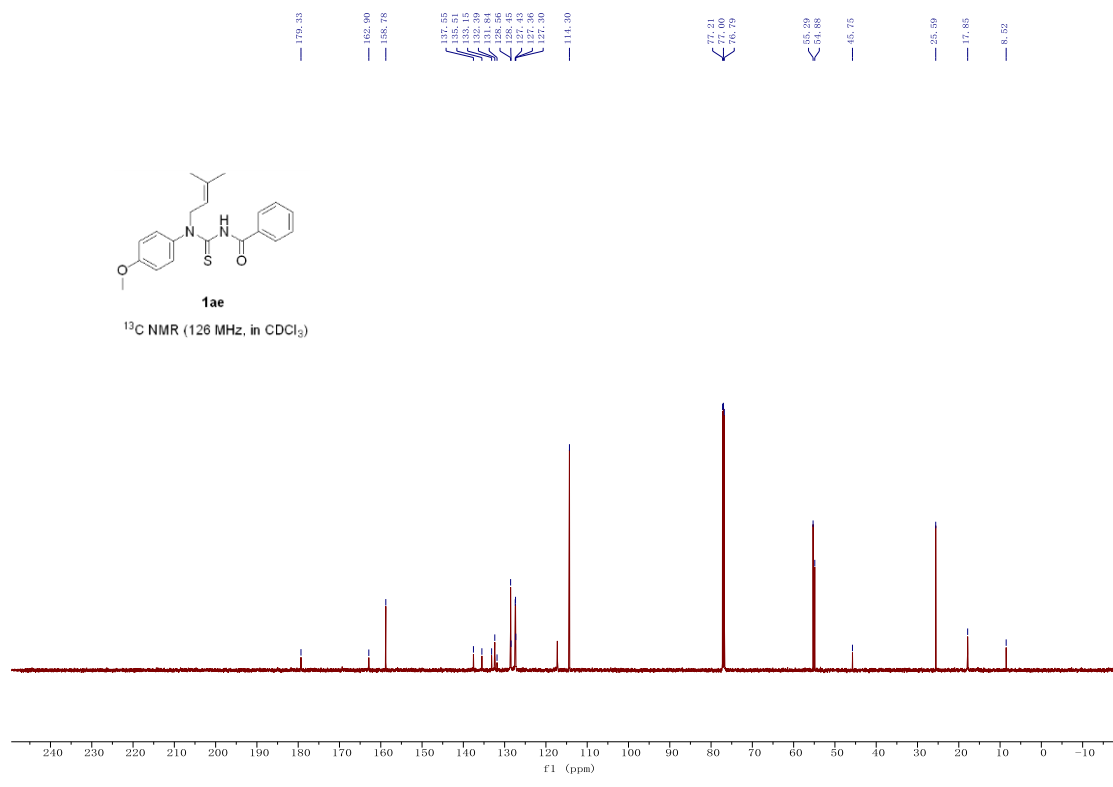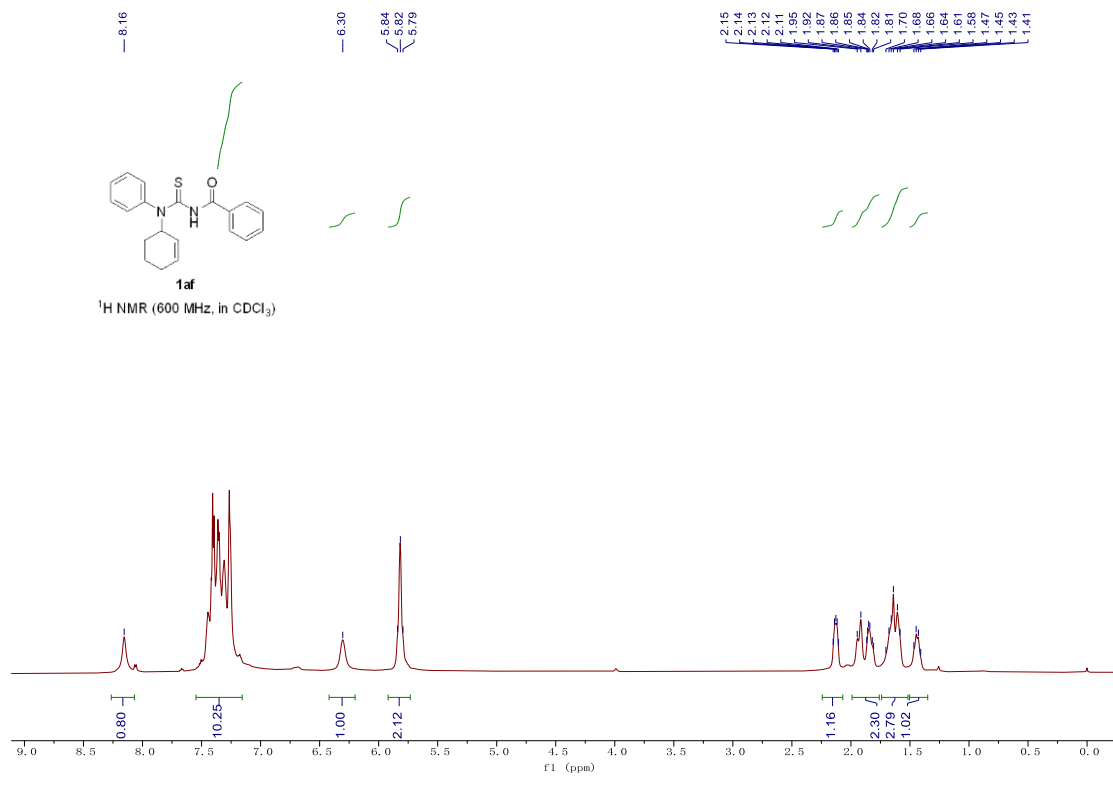

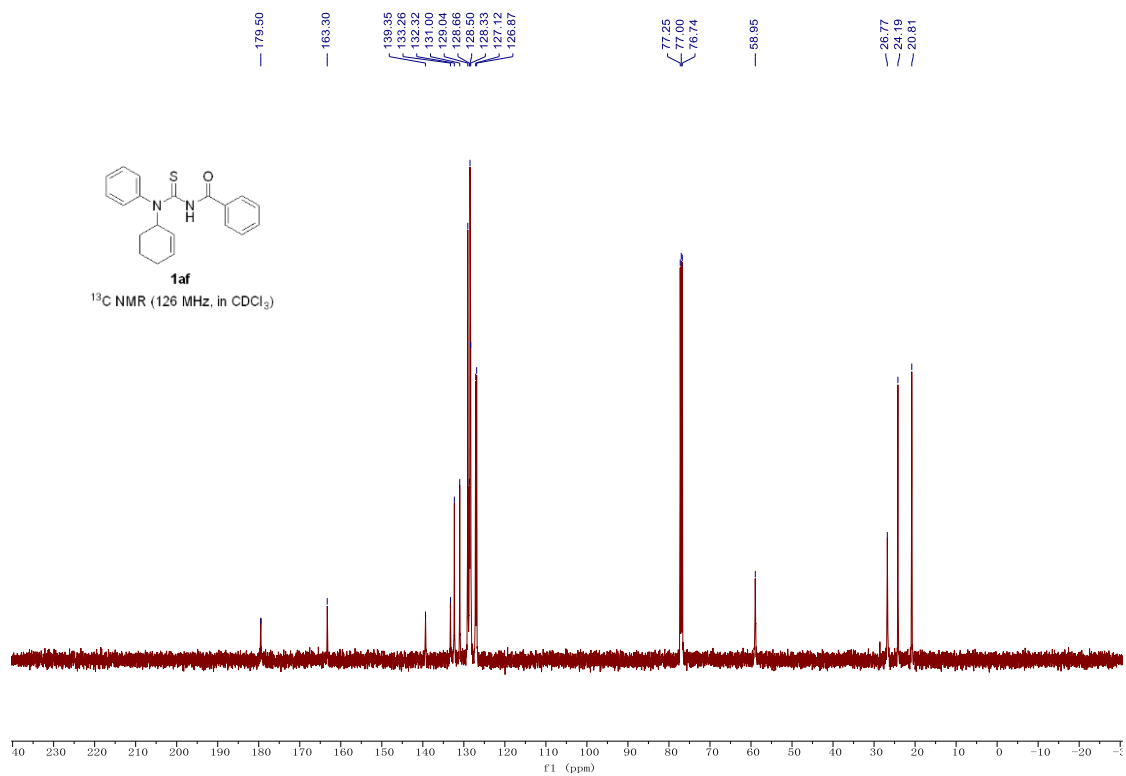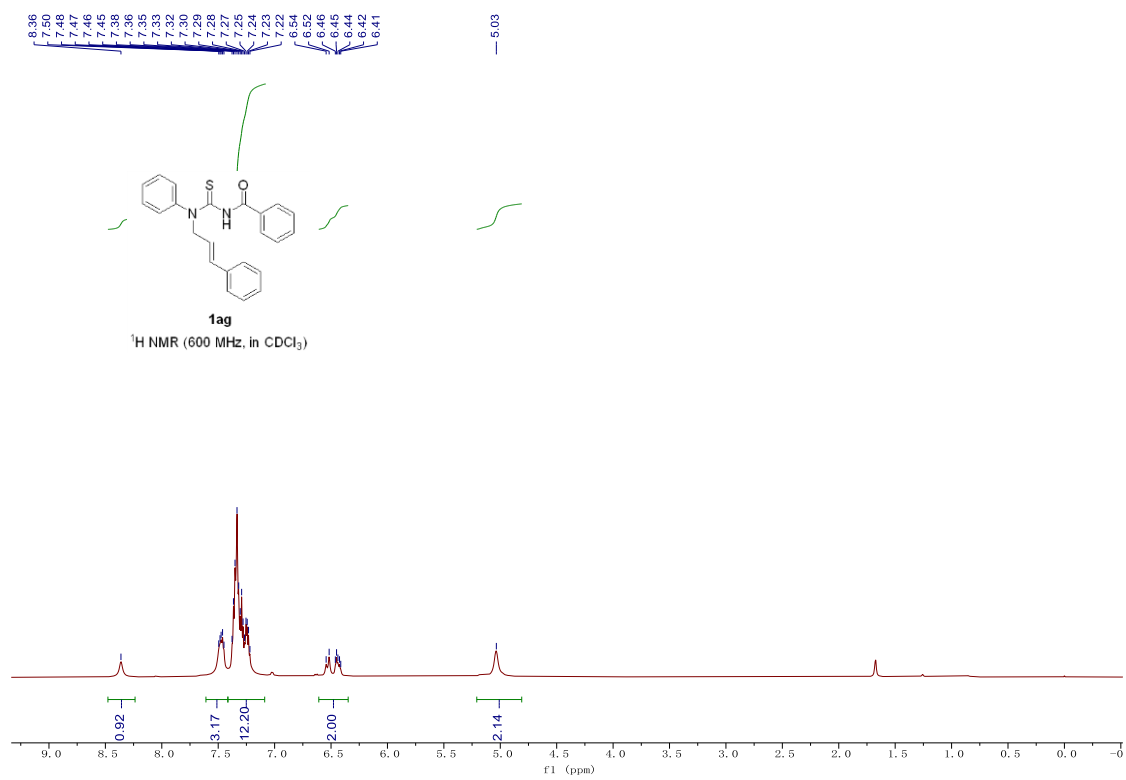

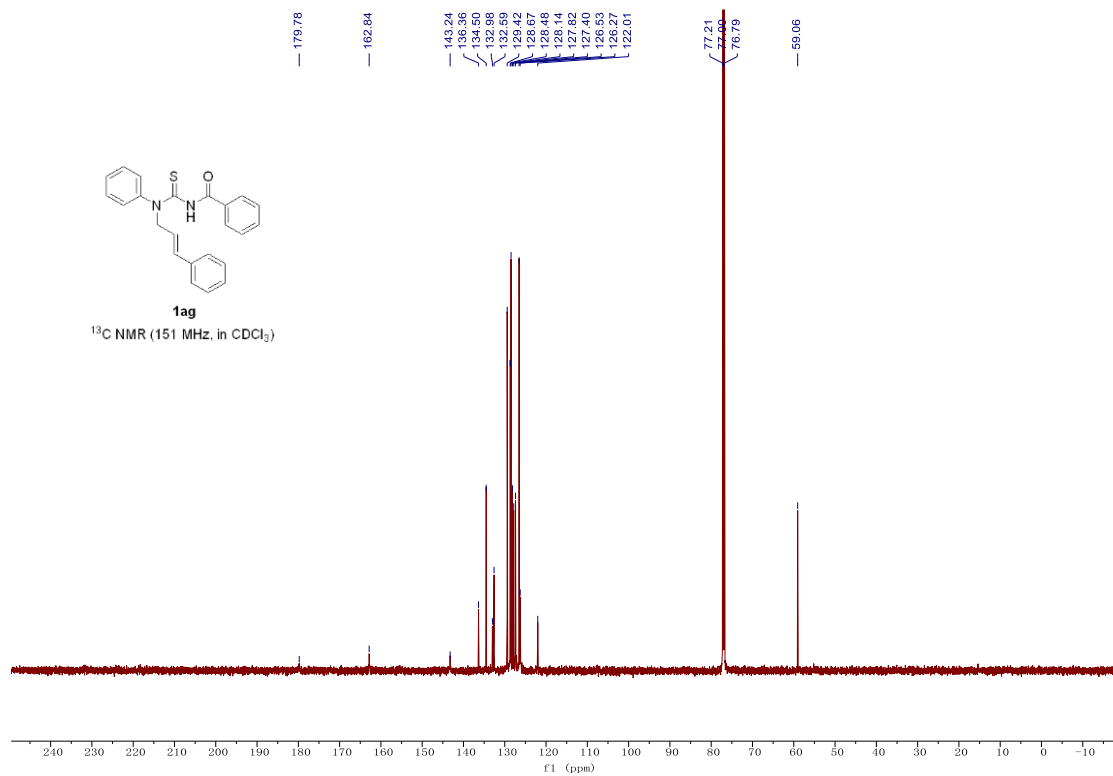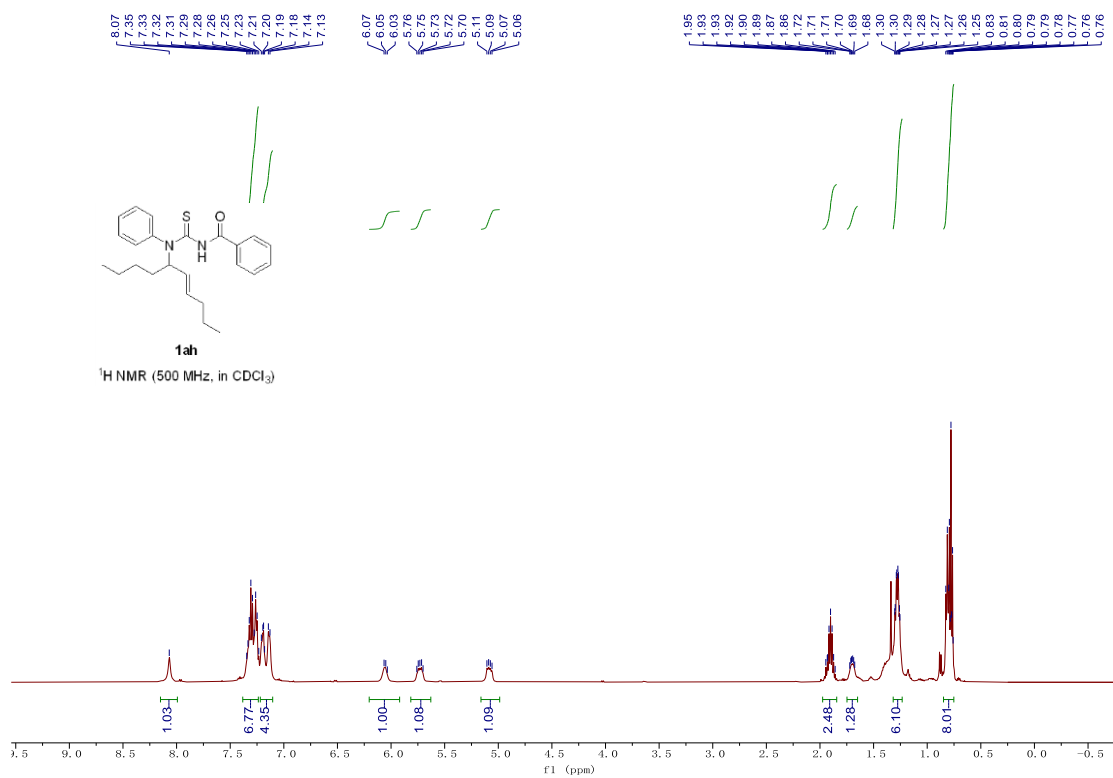

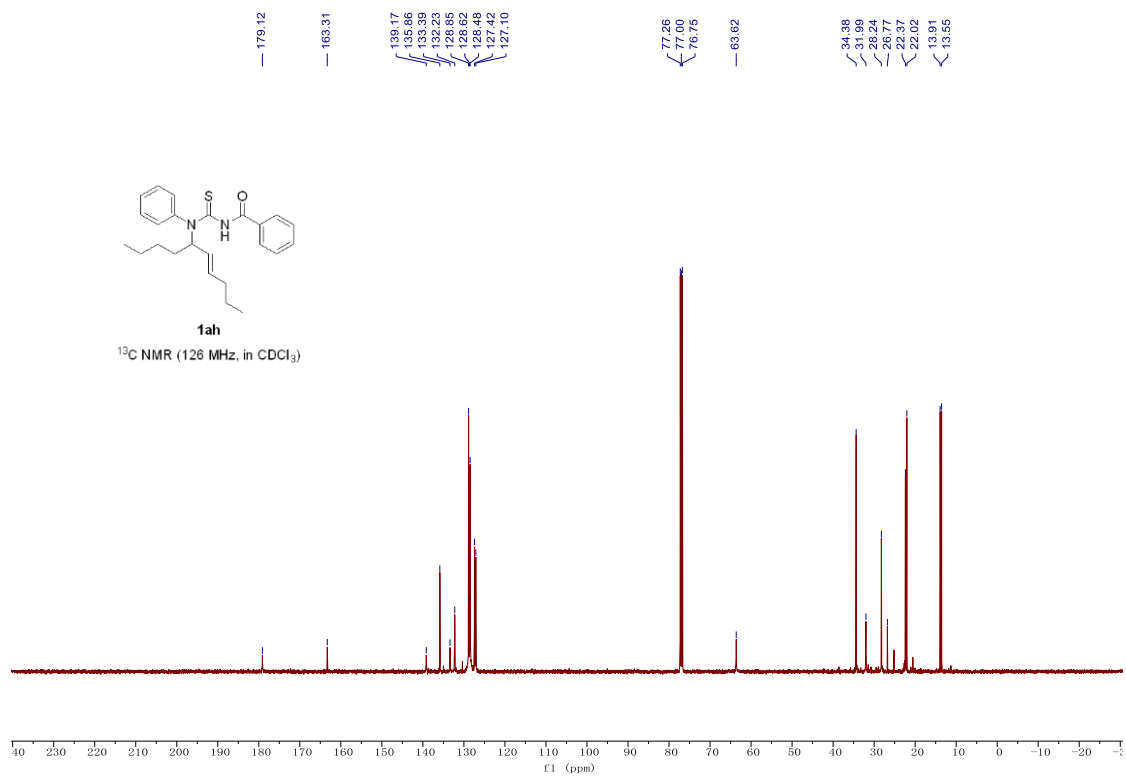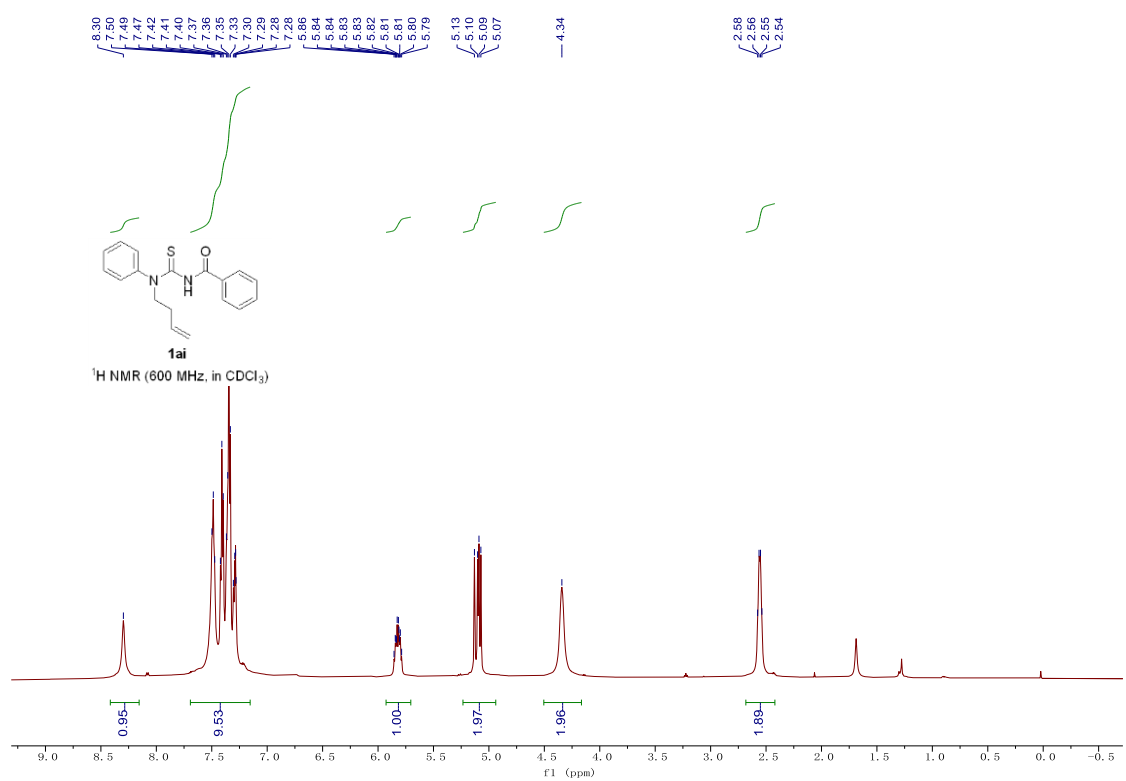

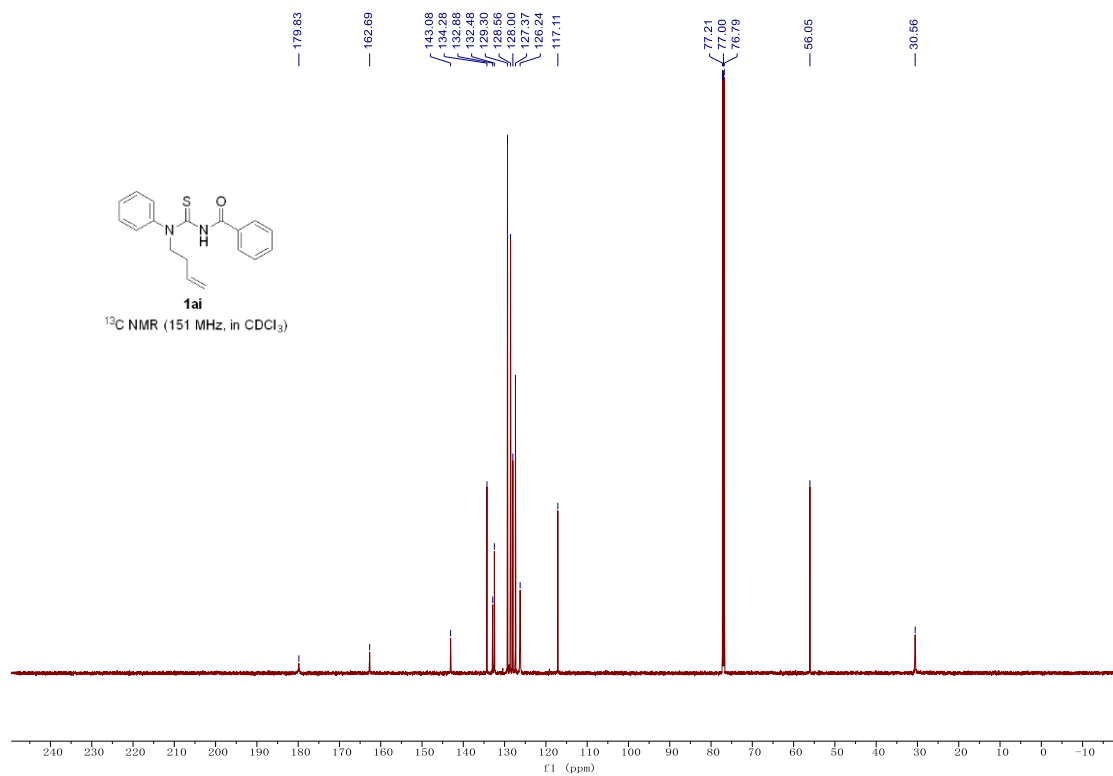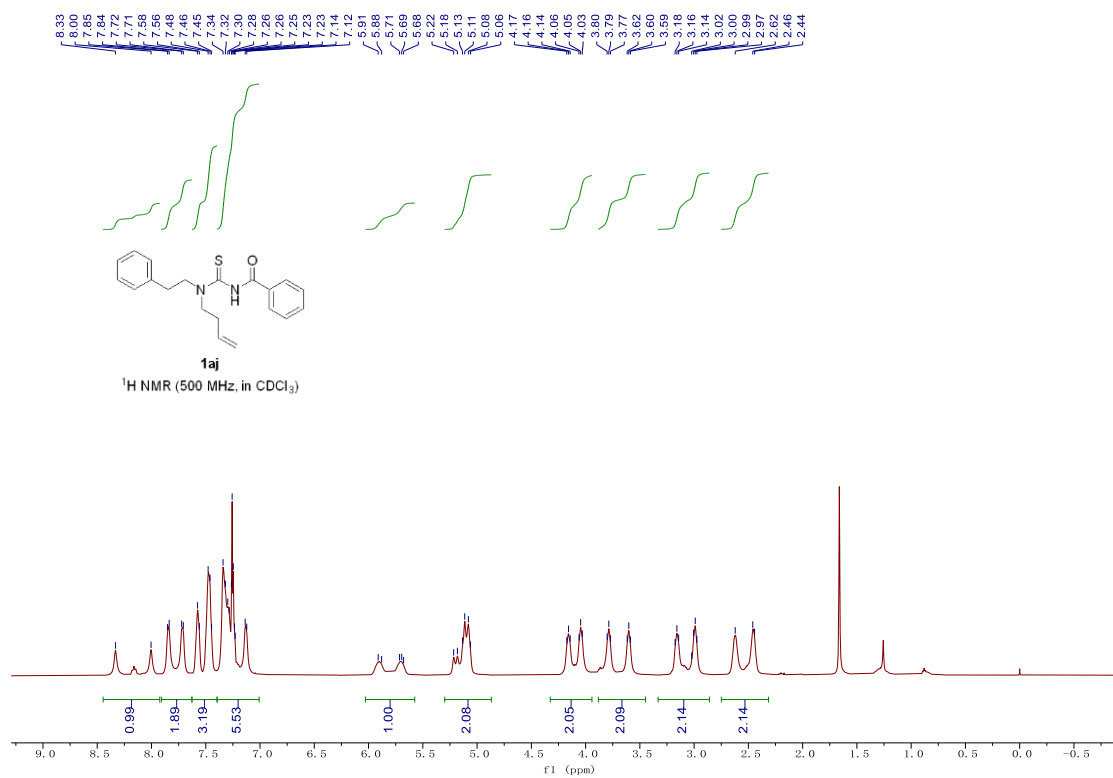

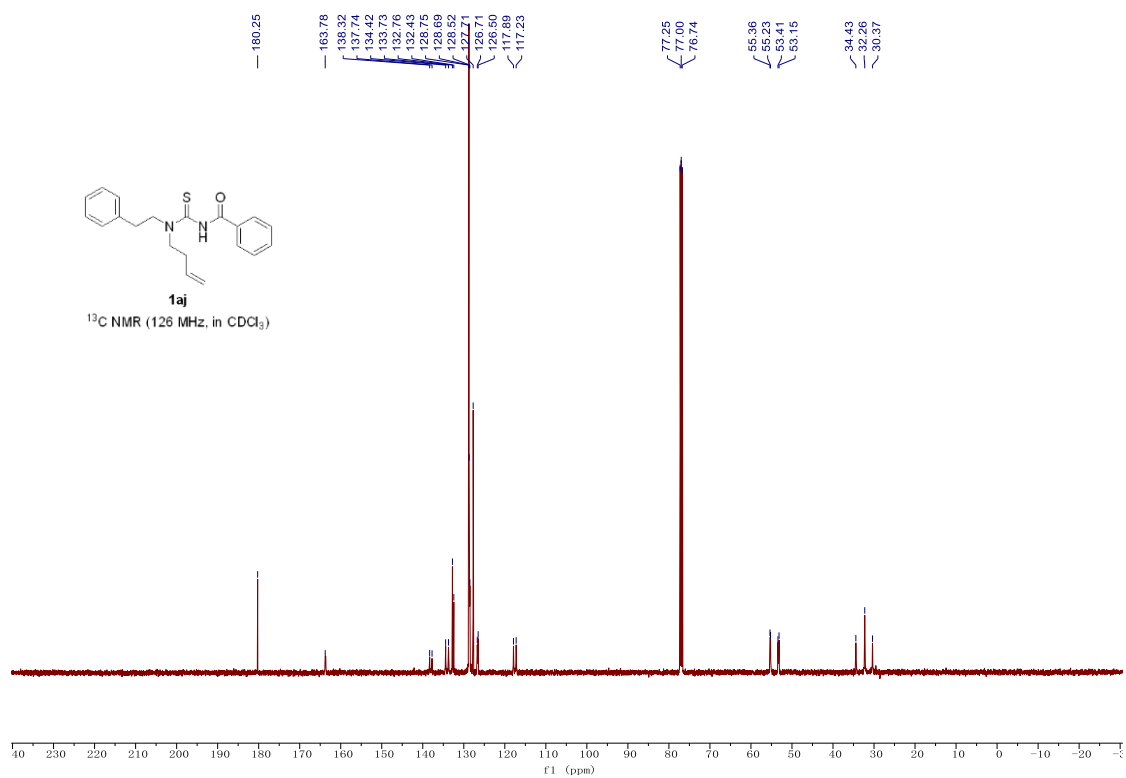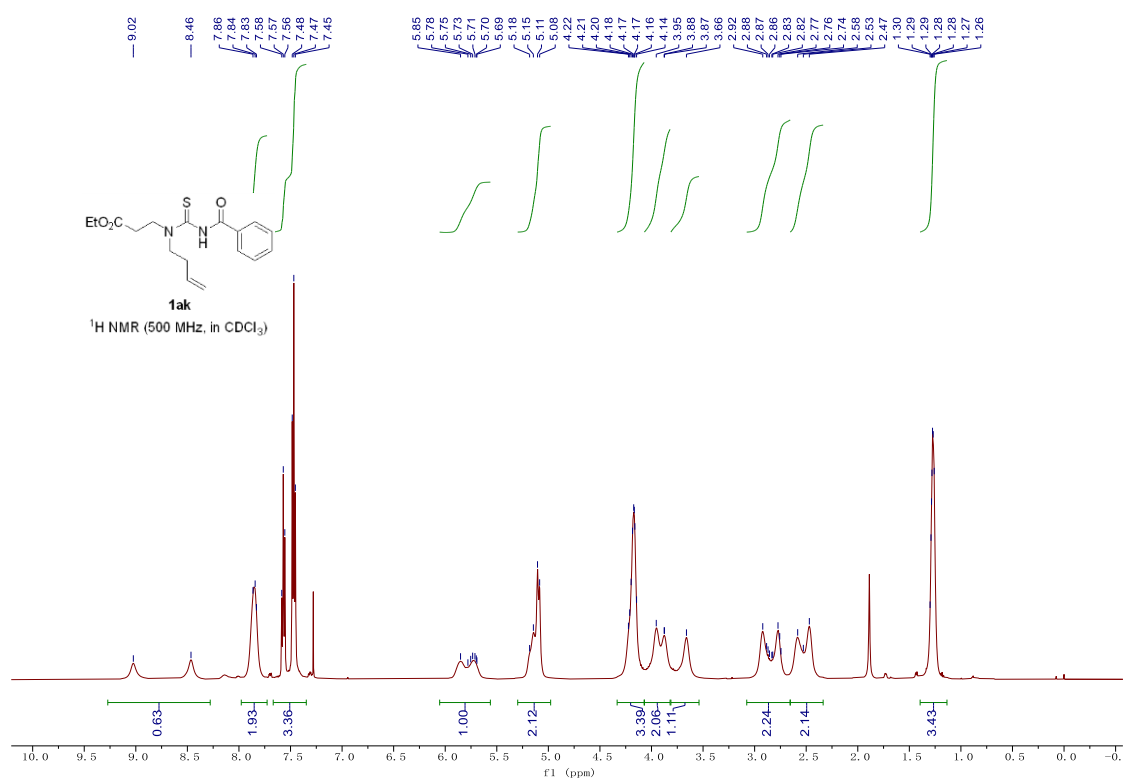



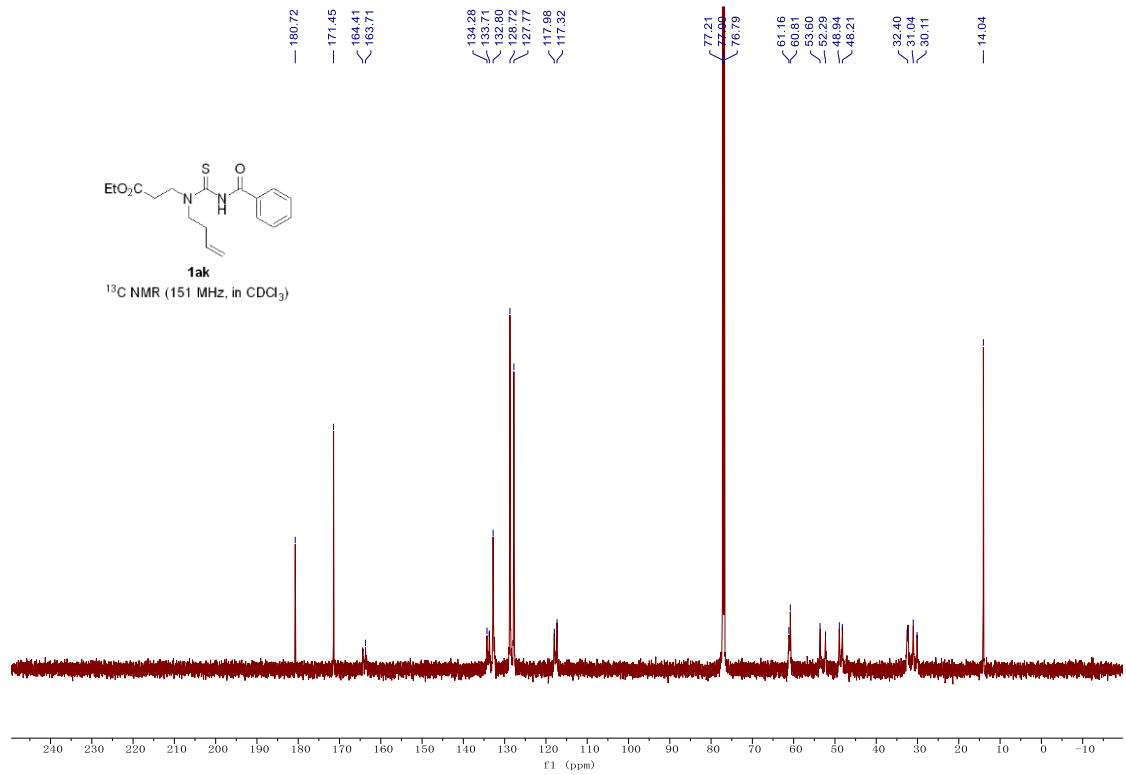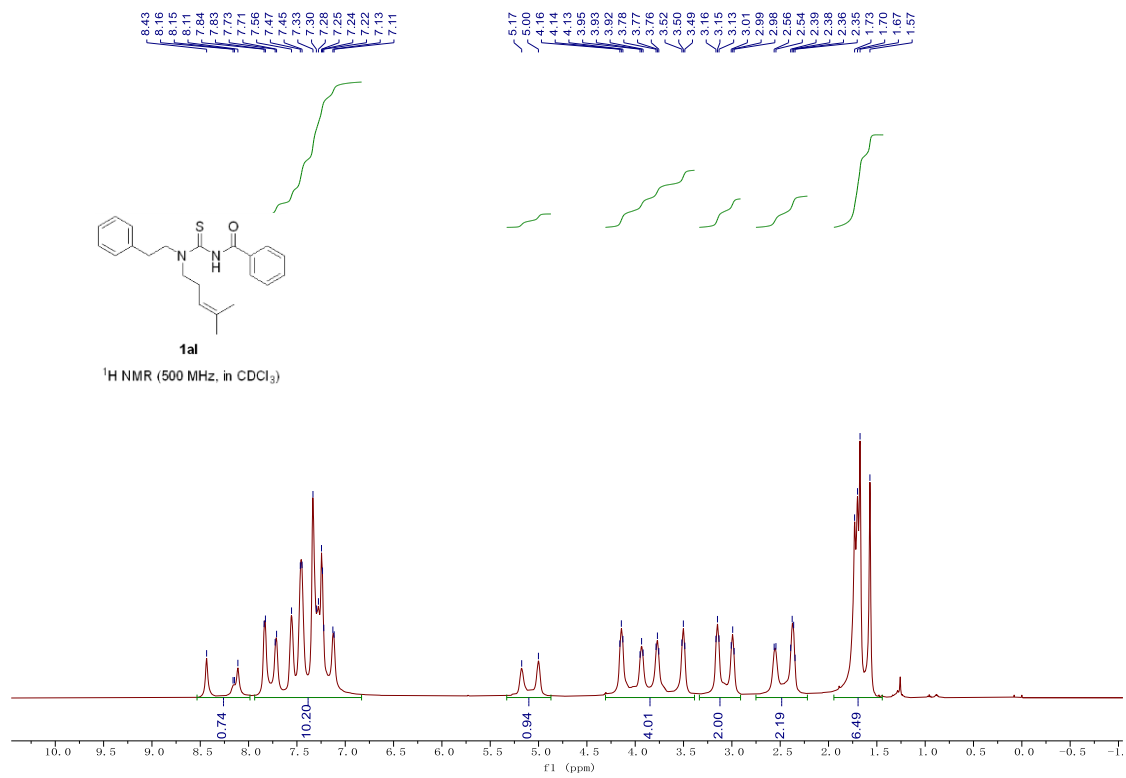

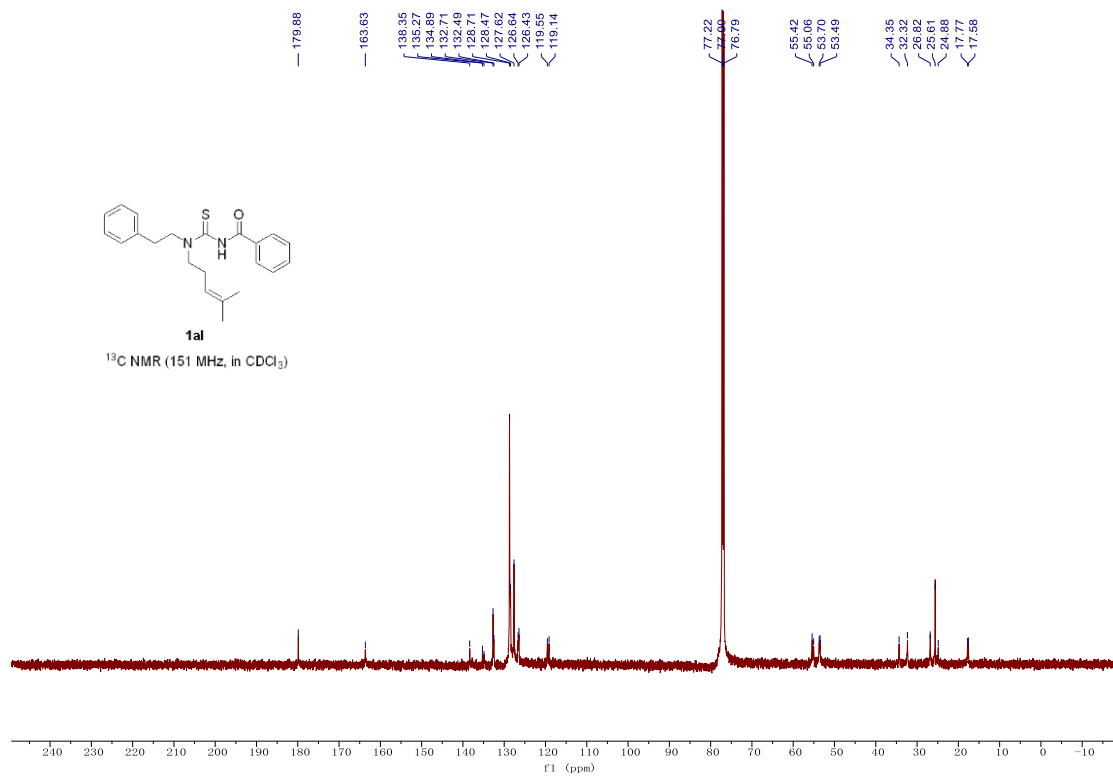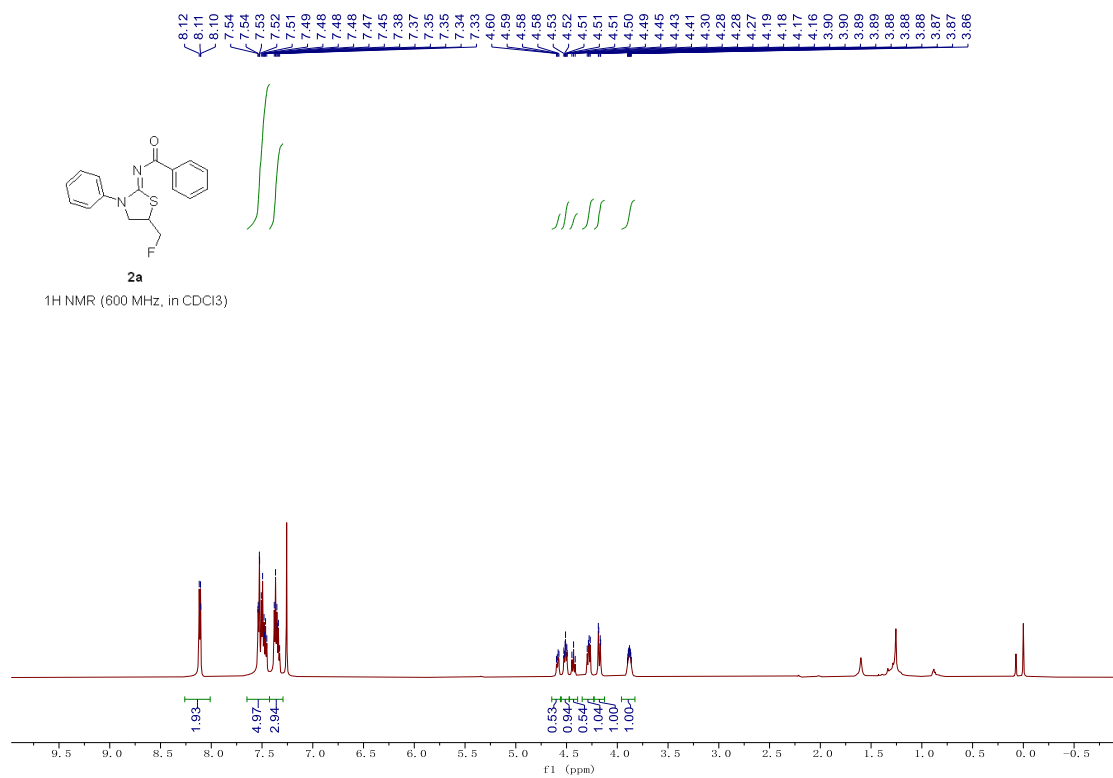

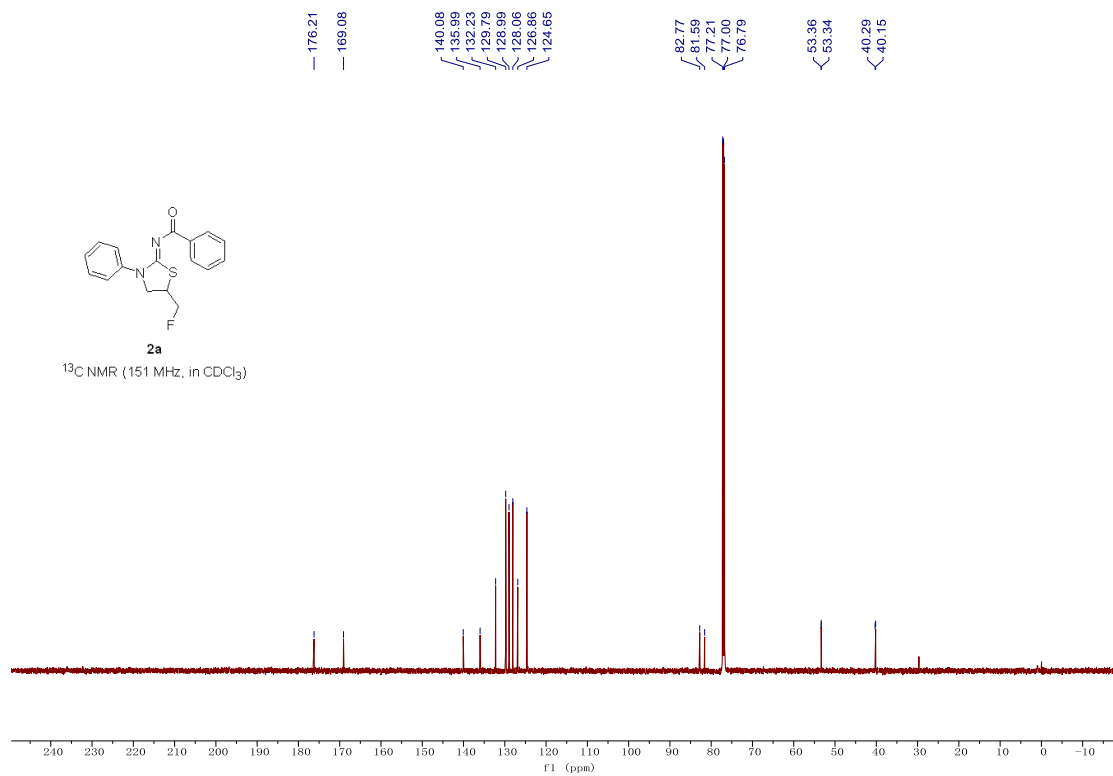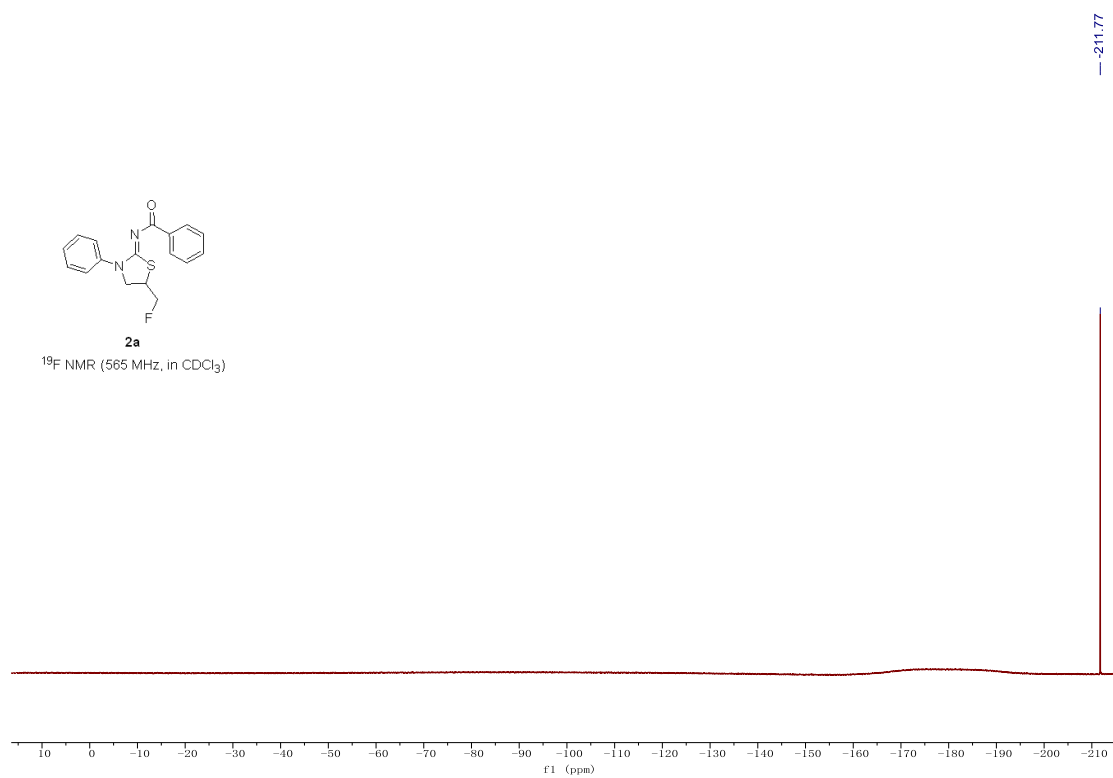

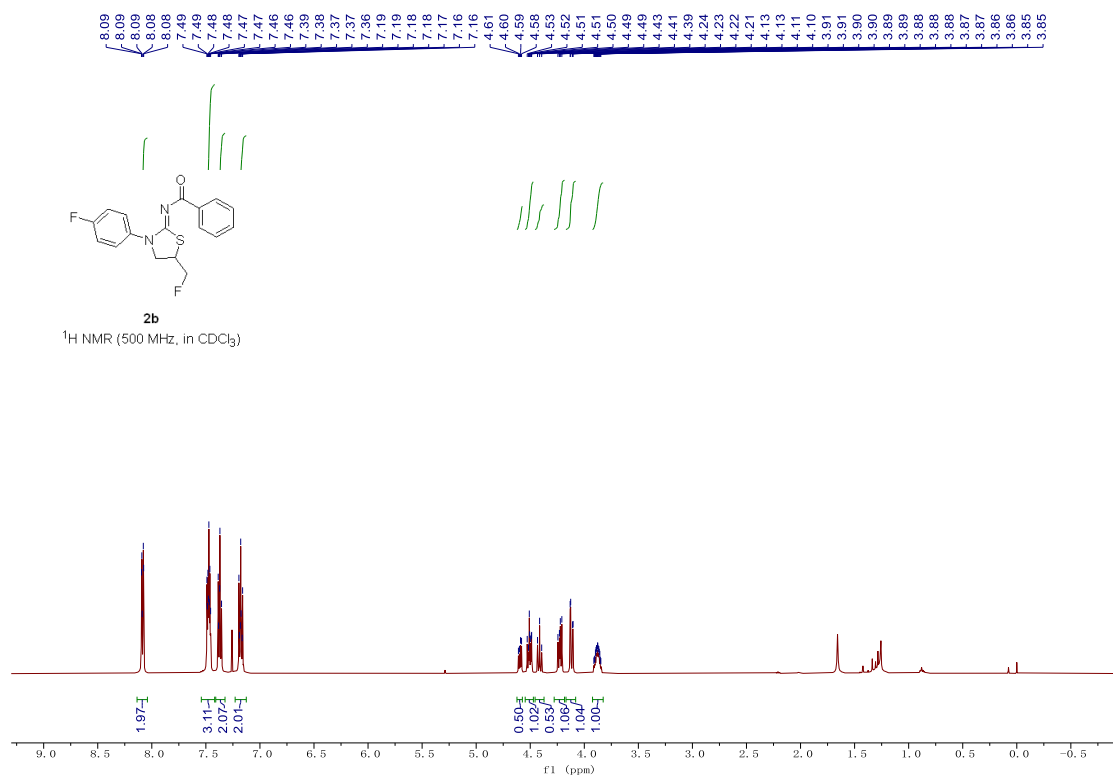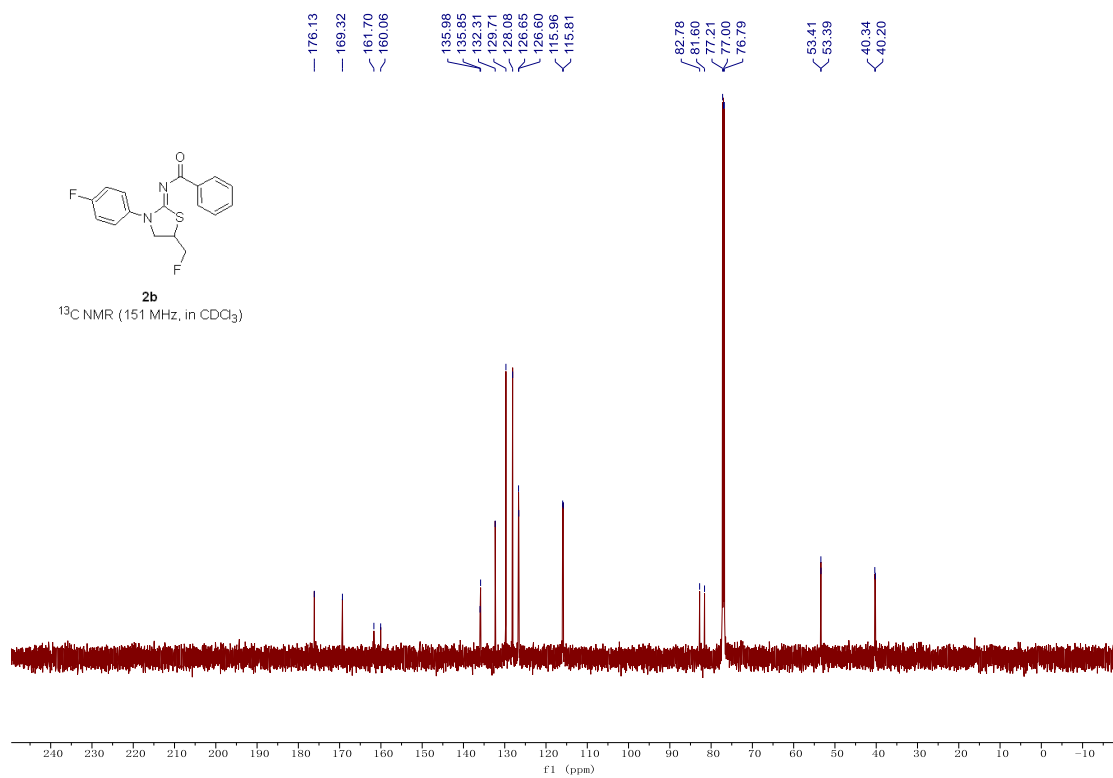

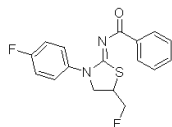

**2b**

<sup>19</sup>F NMR (565 MHz, in CDCl<sub>3</sub>)

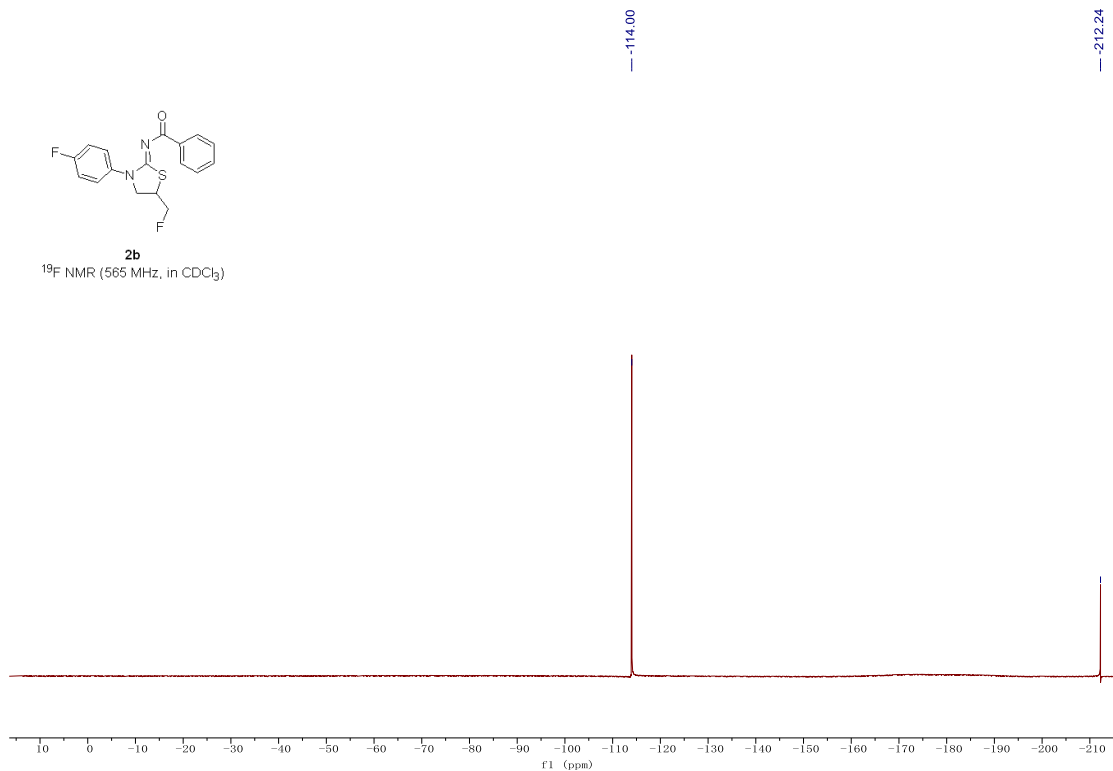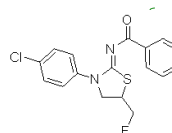

**2c**

<sup>1</sup>H NMR (500 MHz, in CDCl<sub>3</sub>)

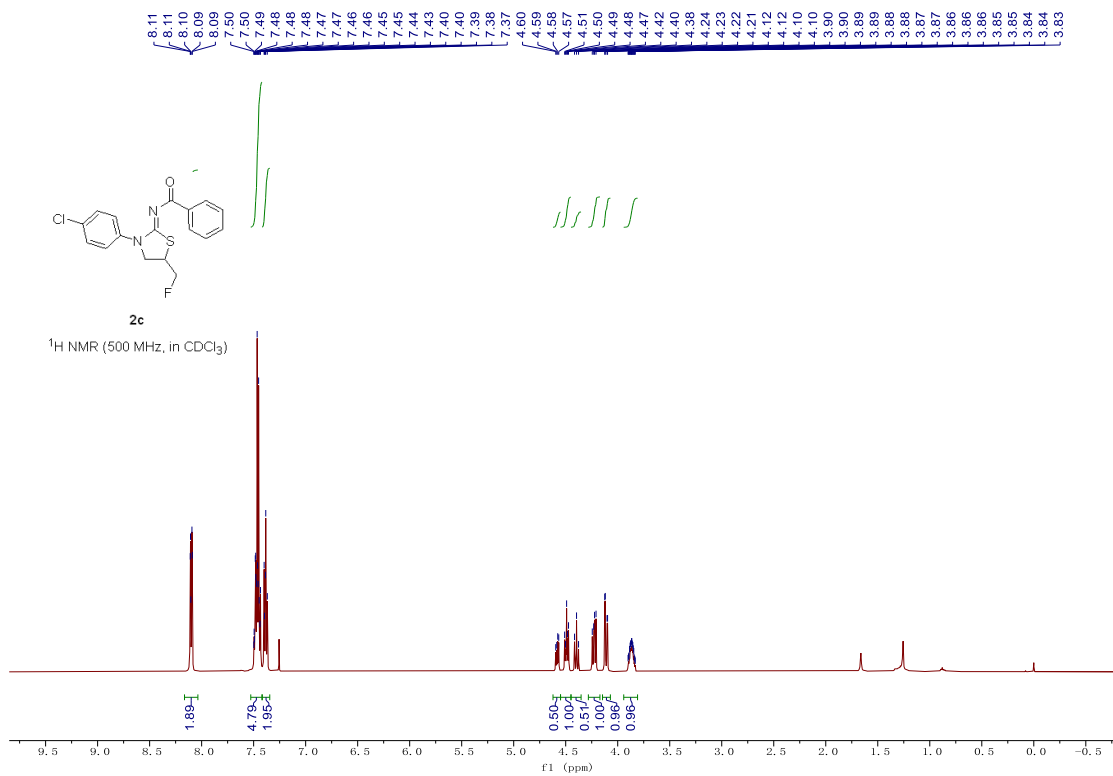

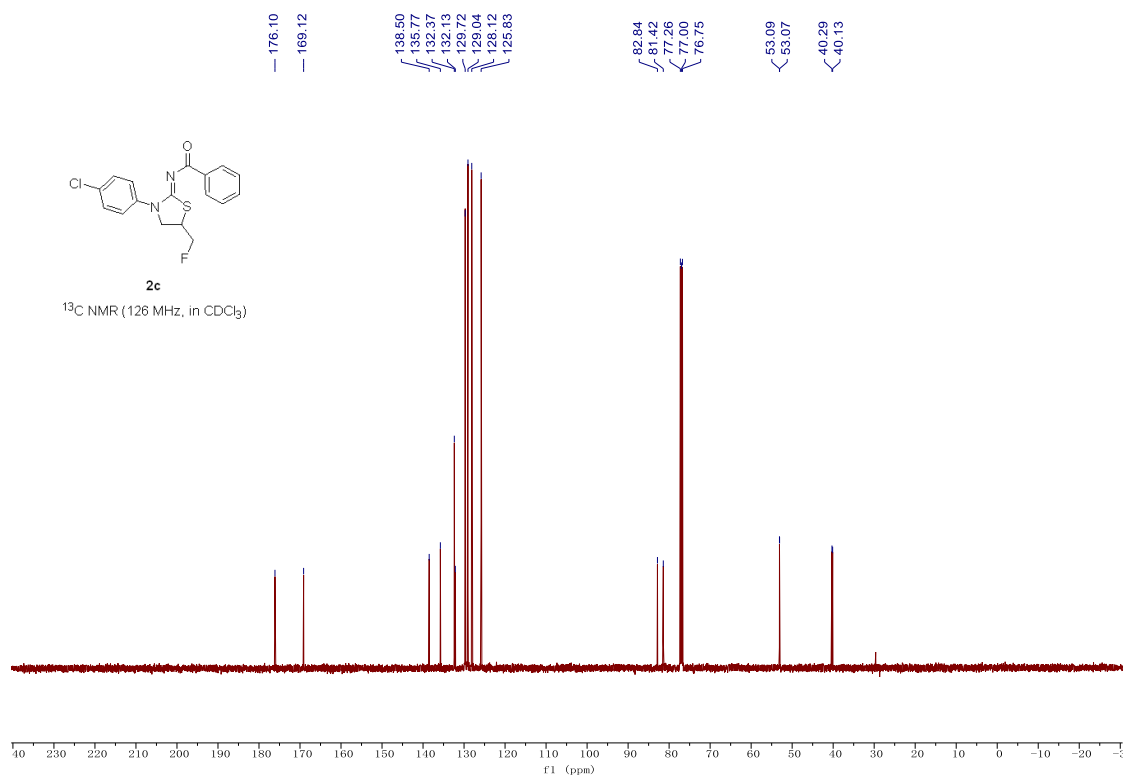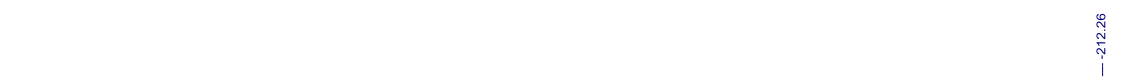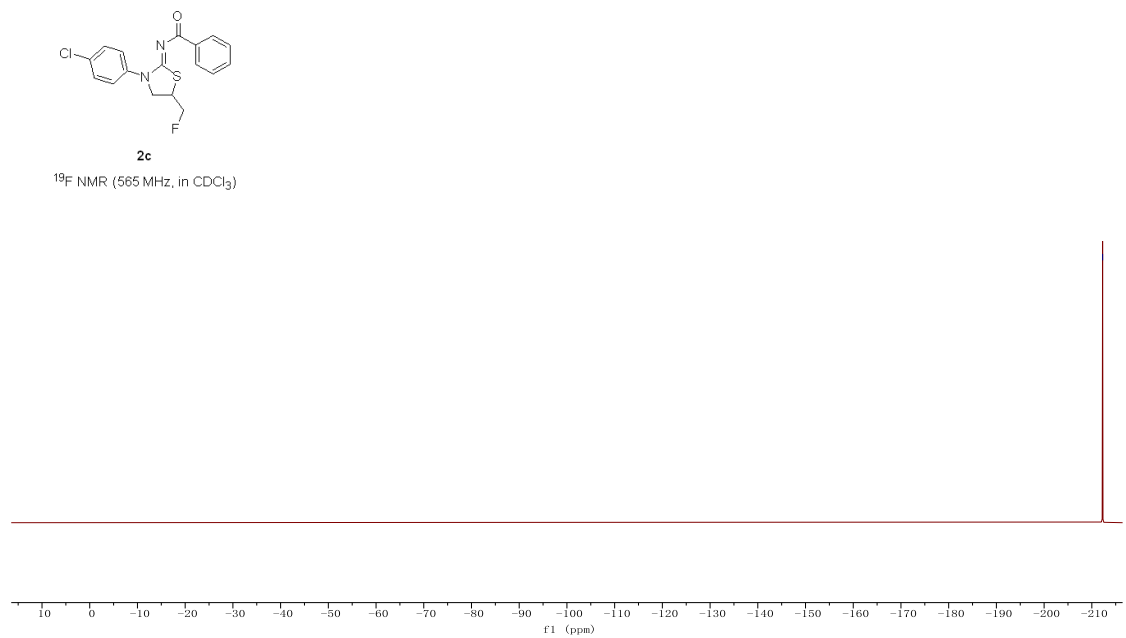

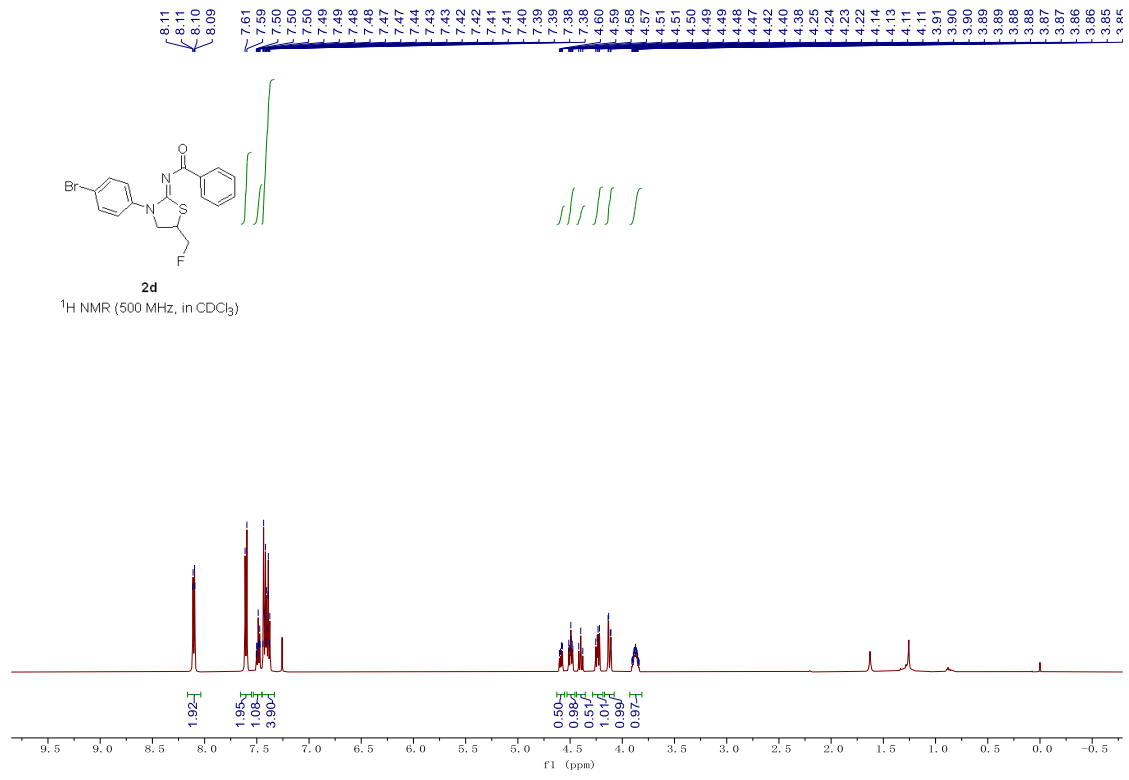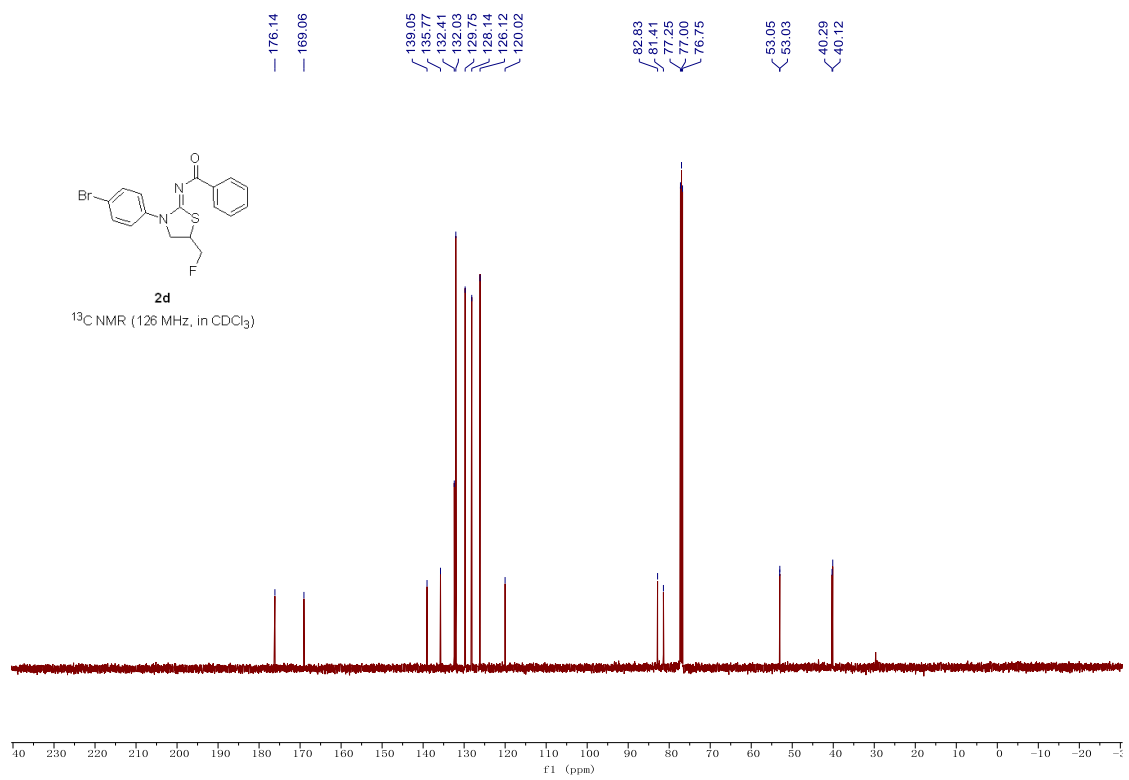

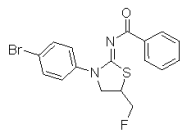

**2d**

<sup>19</sup>F NMR (565 MHz, in CDCl<sub>3</sub>)

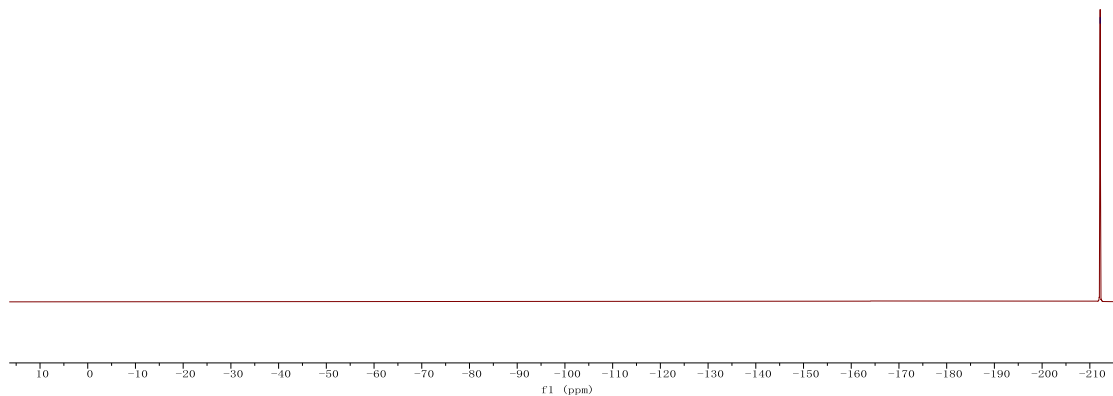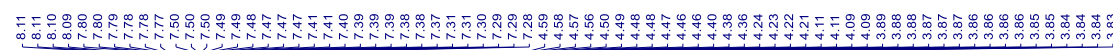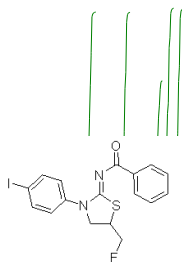

**2e**

<sup>1</sup>H NMR (500 MHz, in CDCl<sub>3</sub>)

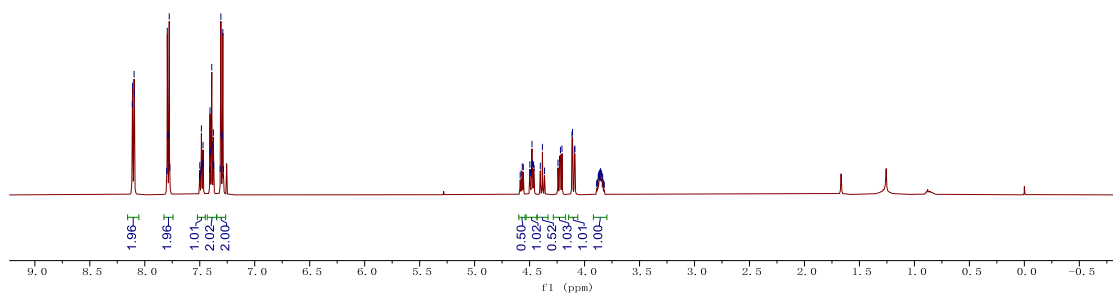



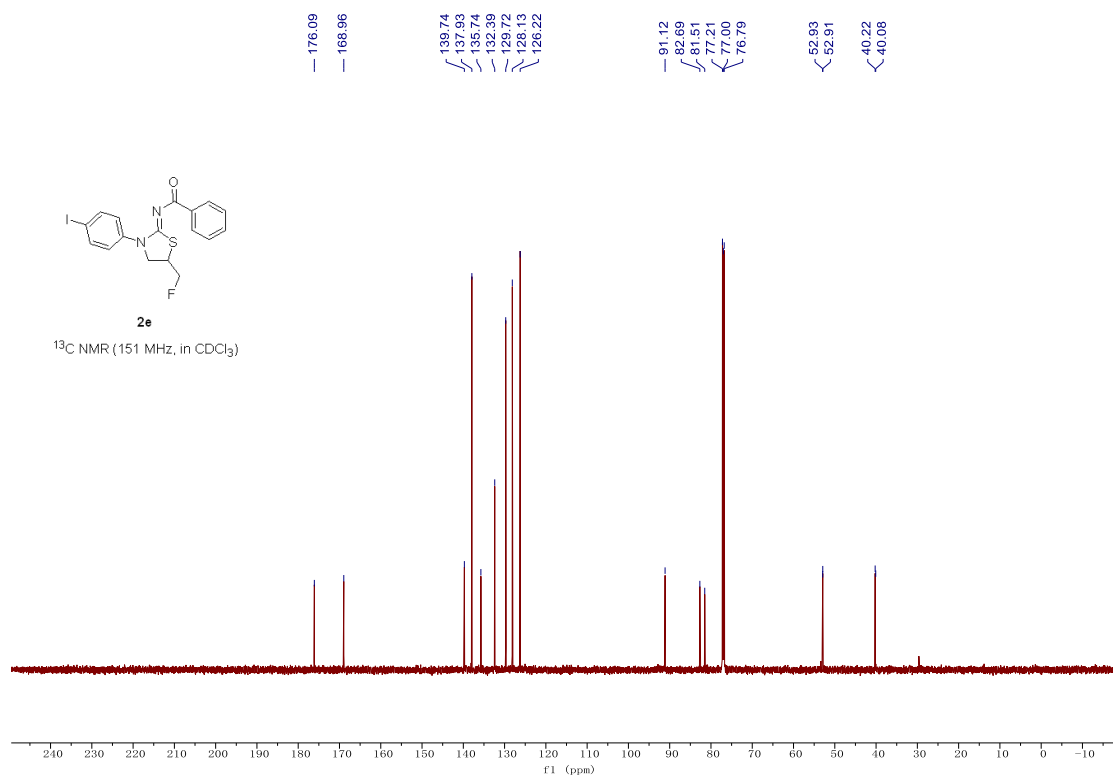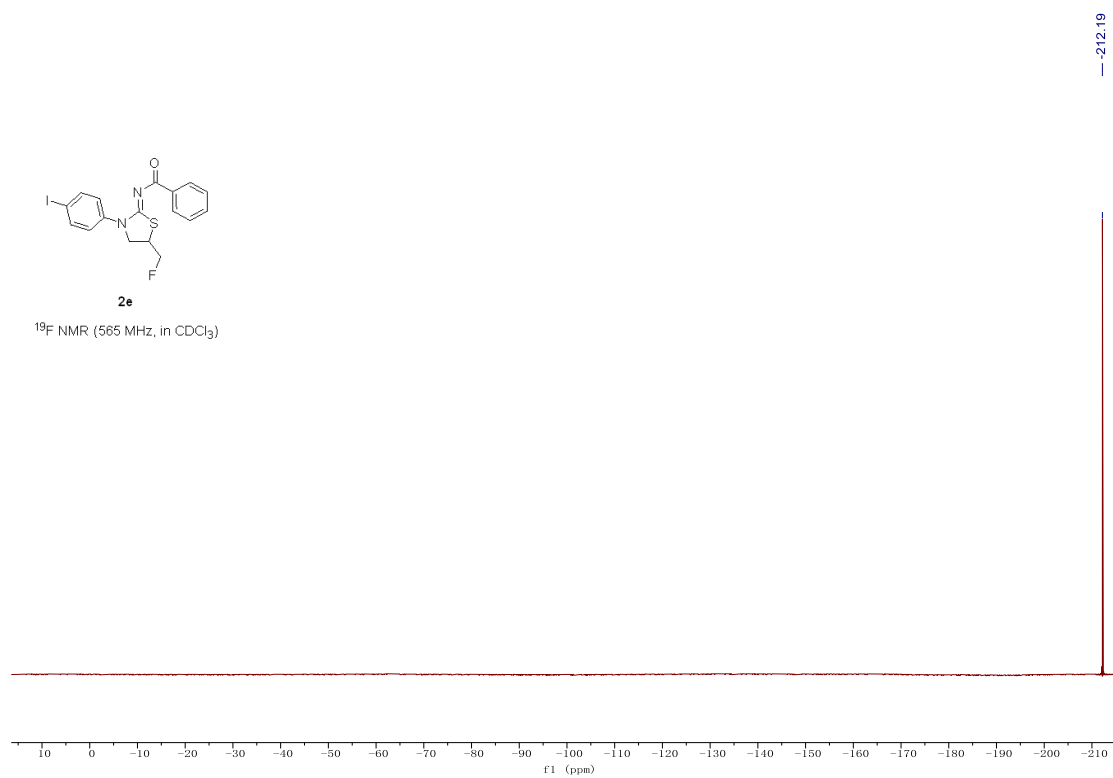

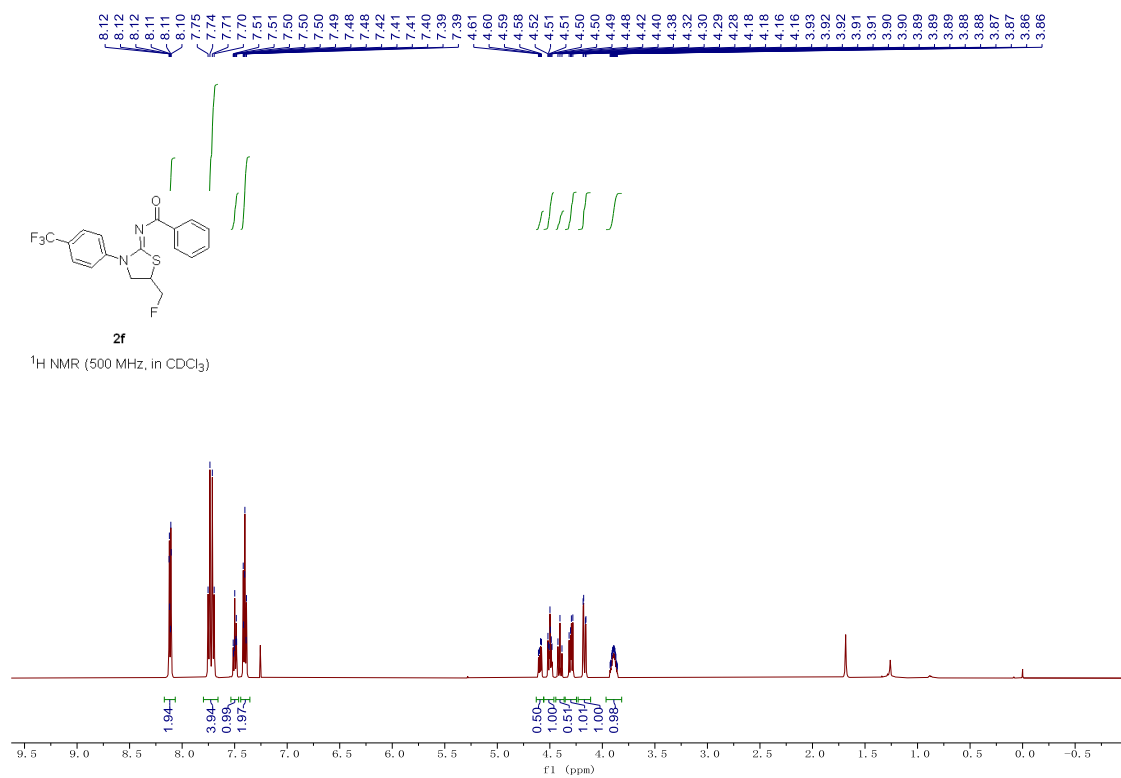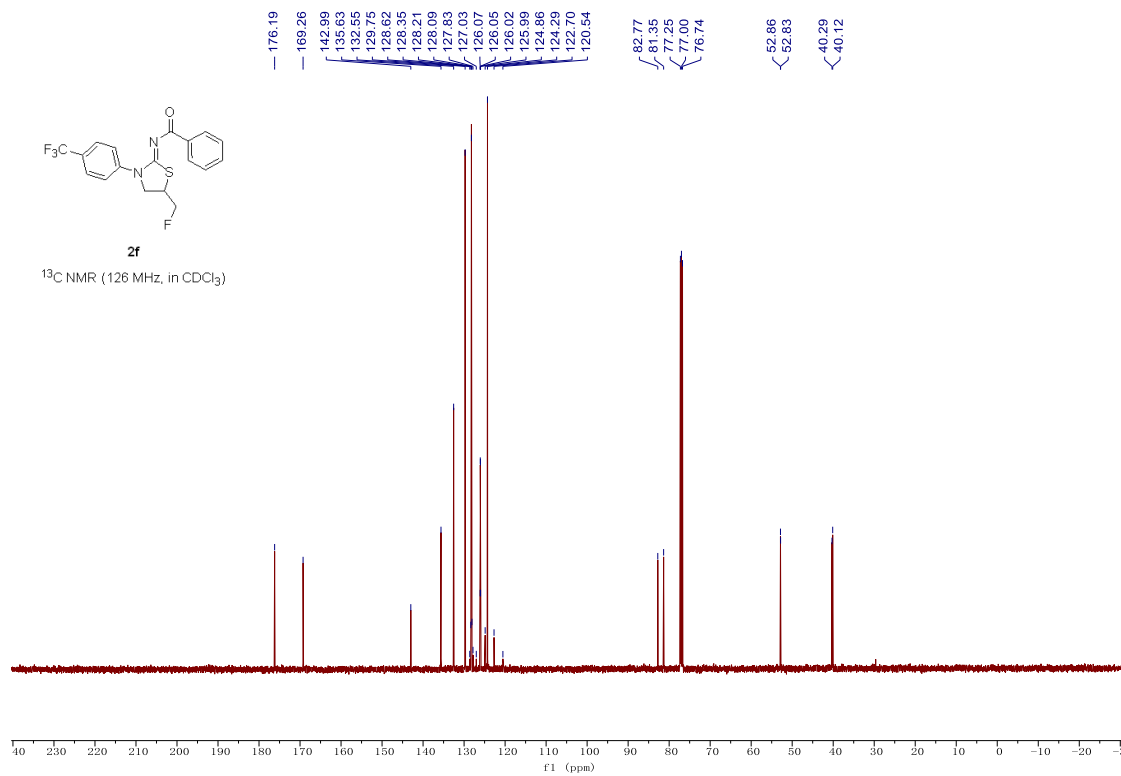

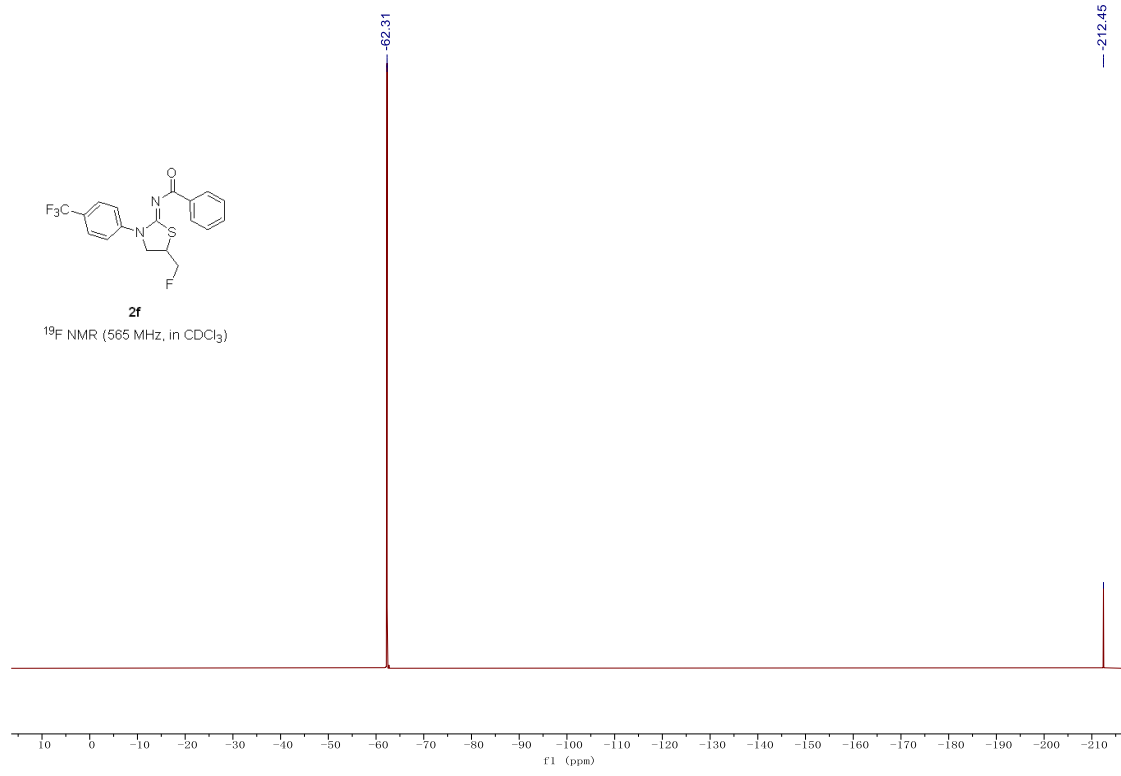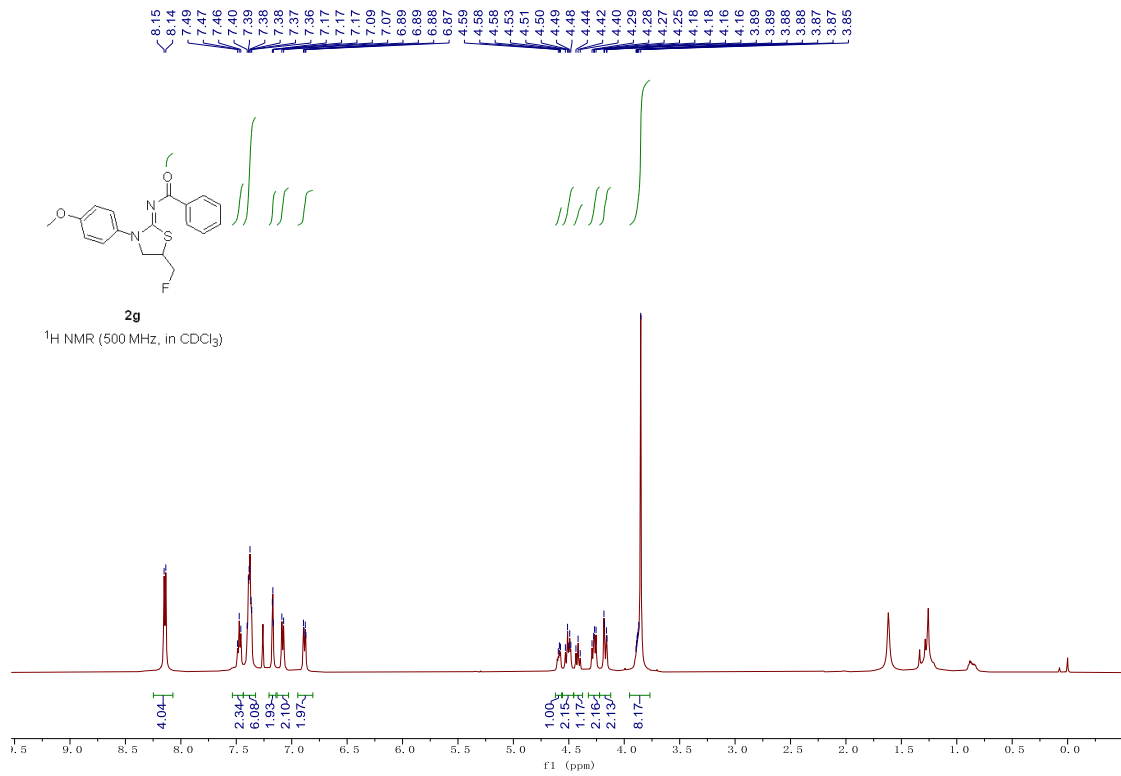

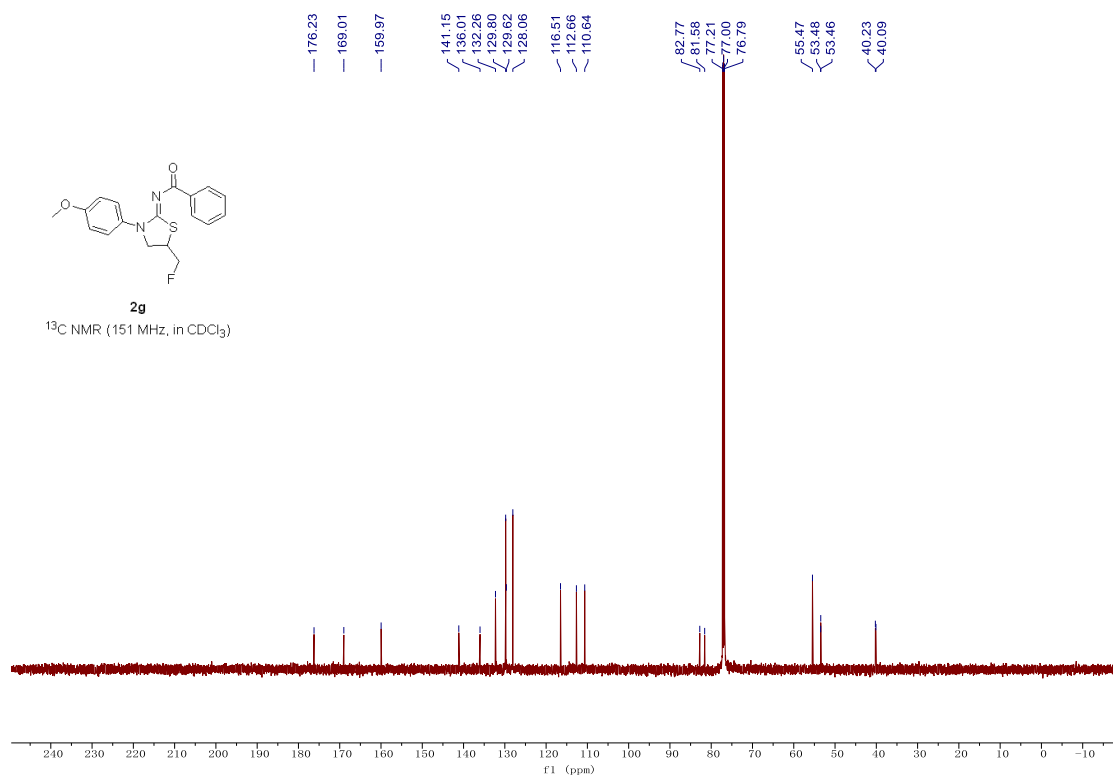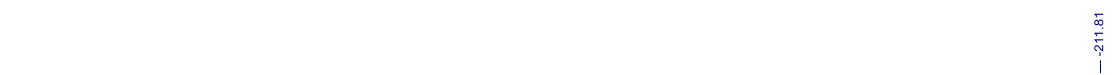

8.04  
8.04  
8.04  
8.03  
8.02  
7.49  
7.48  
7.47  
7.47  
7.46  
7.45  
7.45  
7.44  
7.44  
7.43  
7.43  
7.42  
7.42  
7.41  
7.41  
7.41  
7.40  
7.40  
7.39  
7.38  
7.38  
7.38  
7.35  
7.34  
7.34  
7.33  
7.33  
7.32  
7.31  
7.29  
7.29  
7.28  
7.27  
7.27  
7.26  
7.26  
7.26  
7.25  
7.25  
7.23  
7.23  
4.60  
4.59  
4.57  
4.55  
4.55  
4.50  
4.49  
4.47  
4.45  
4.20  
4.19  
4.16  
4.16  
4.09  
4.07  
4.06  
3.94  
3.93  
3.93  
3.92  
3.91  
3.91

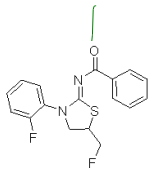

2h

<sup>1</sup>H NMR (500 MHz, in CDCl<sub>3</sub>)

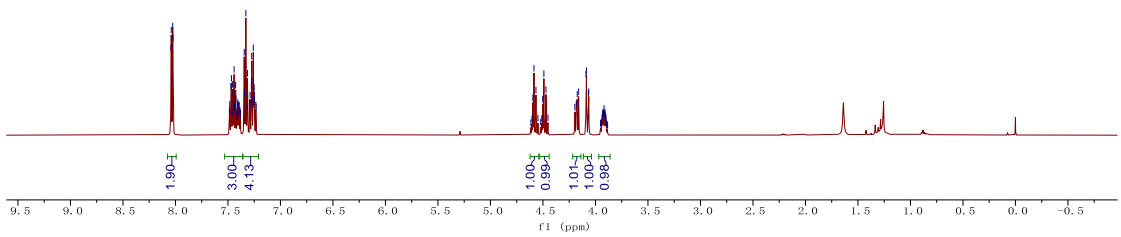

176.21  
169.87  
158.12  
156.45  
135.82  
132.23  
129.75  
129.67  
129.62  
128.75  
127.99  
127.43  
127.35  
124.54  
124.52  
116.82  
116.69  
82.72  
81.53  
77.21  
77.00  
76.79  
52.59  
52.57  
52.55  
41.22  
41.08

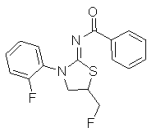

2h

<sup>13</sup>C NMR (151 MHz, in CDCl<sub>3</sub>)

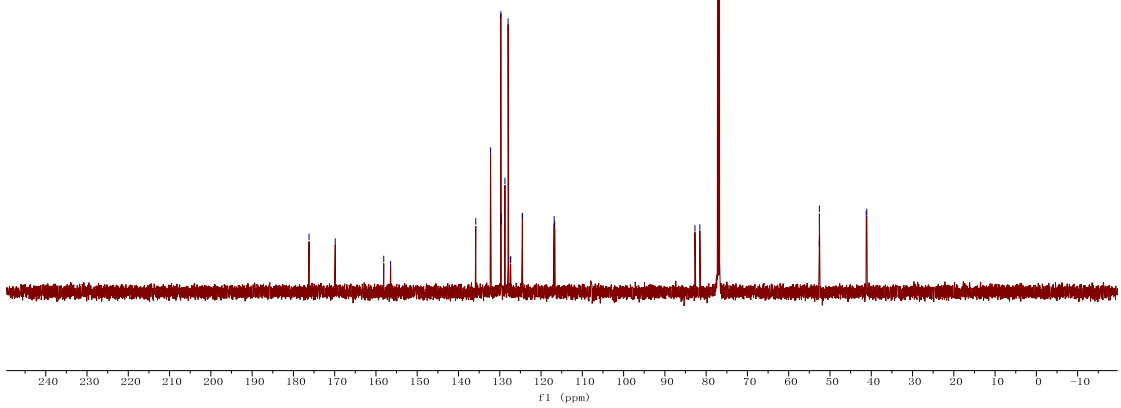

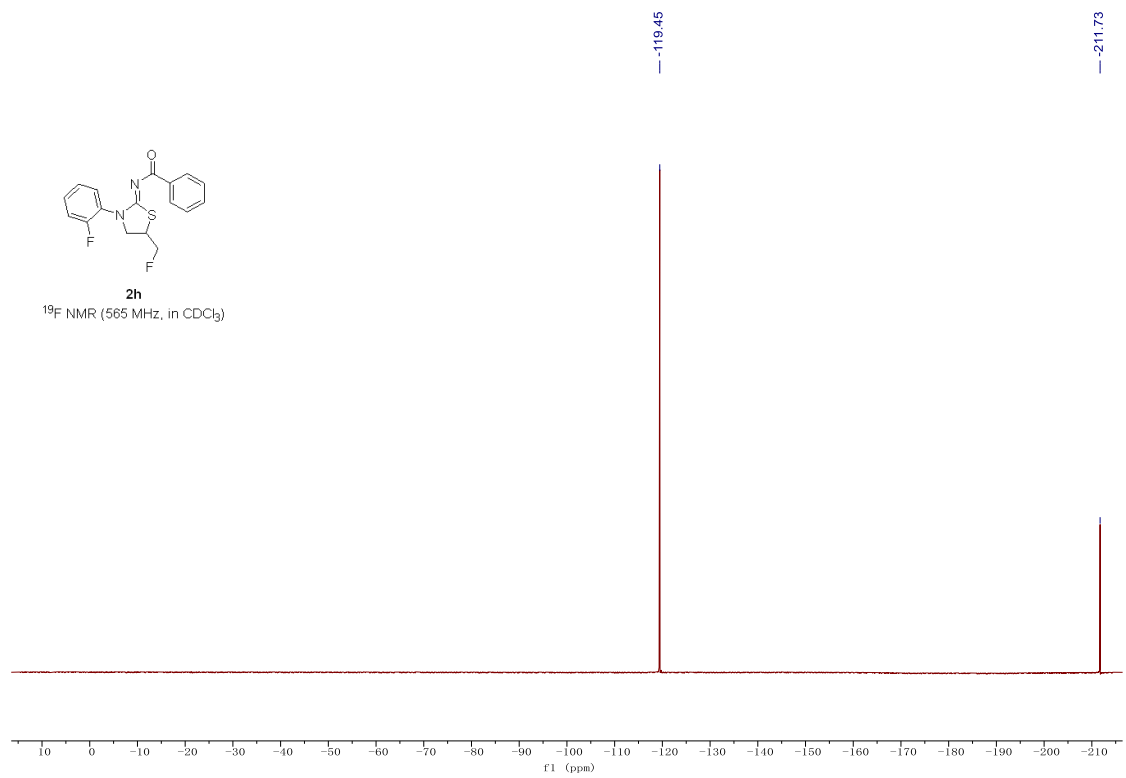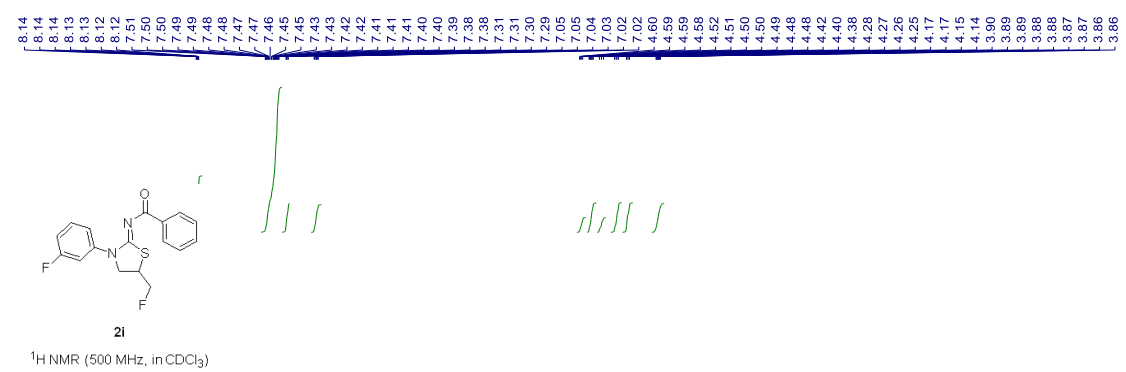

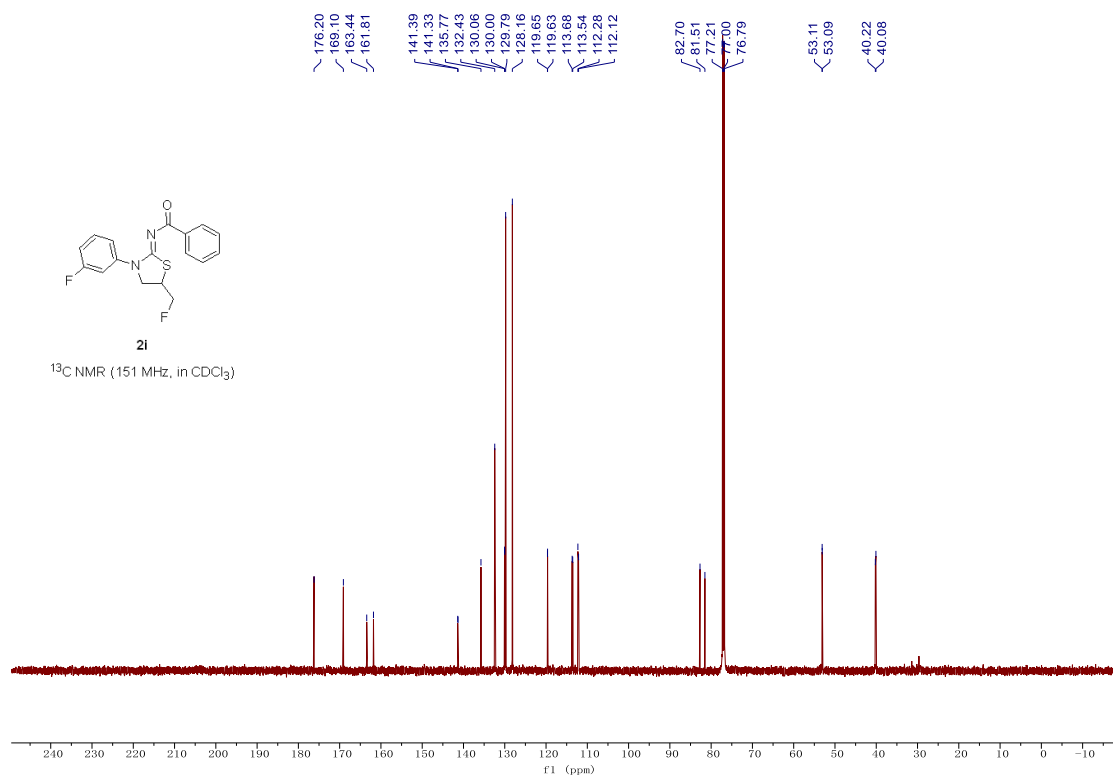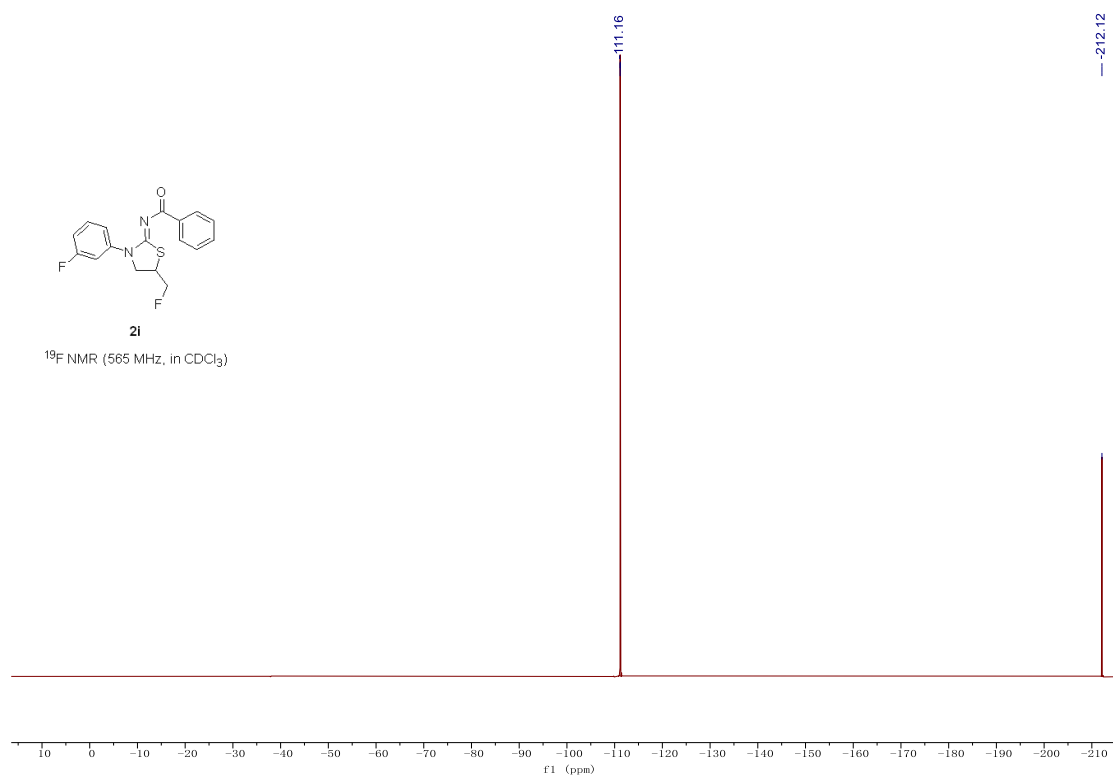

8.31  
8.31  
8.30  
8.29  
7.52  
7.52  
7.51  
7.50  
7.49  
7.44  
7.44  
7.43  
7.42  
7.41  
7.41  
7.38  
7.38  
7.38  
7.37  
7.36  
7.36  
7.35  
7.35  
7.34  
7.34  
7.33  
7.33  
7.32  
7.31  
5.04  
5.01  
5.00  
4.97  
4.48  
4.47  
4.46  
4.45  
4.38  
4.37  
4.36  
4.35  
4.31  
4.29  
4.27  
4.22  
4.20  
4.18  
3.78  
3.77  
3.77  
3.76  
3.76  
3.75  
3.74  
3.74  
3.73  
3.73  
3.72  
3.72  
3.68  
3.66  
3.65  
3.64  
3.63

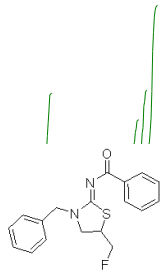

2j

<sup>1</sup>H NMR (500 MHz, in CDCl<sub>3</sub>)

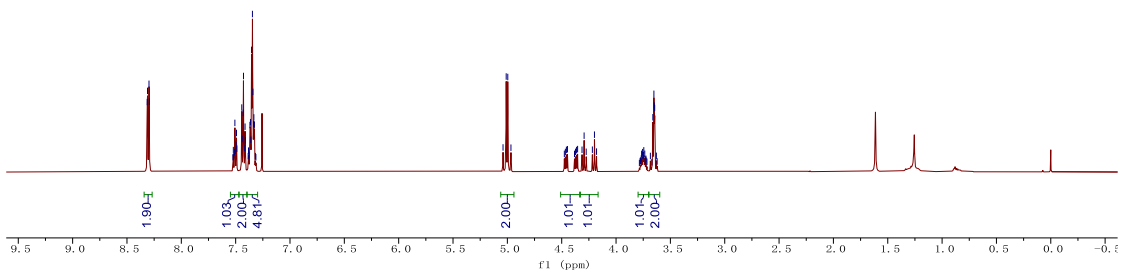

175.98  
170.16  
136.28  
135.38  
132.09  
129.70  
128.93  
128.24  
128.21  
128.06  
83.06  
81.87  
77.21  
77.00  
76.79  
51.34  
50.22  
50.20  
40.39  
40.26

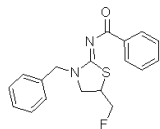

2j

<sup>13</sup>C NMR (151 MHz, in CDCl<sub>3</sub>)

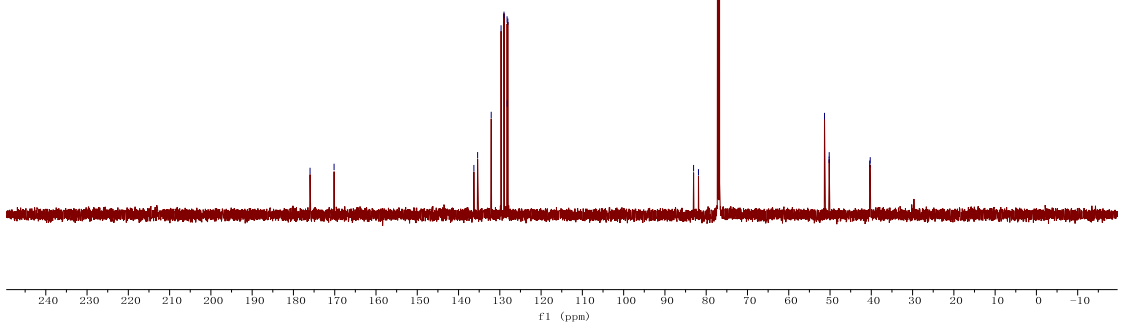



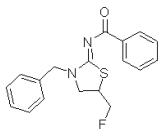

2j

<sup>19</sup>F NMR (565 MHz, in CDCl<sub>3</sub>)

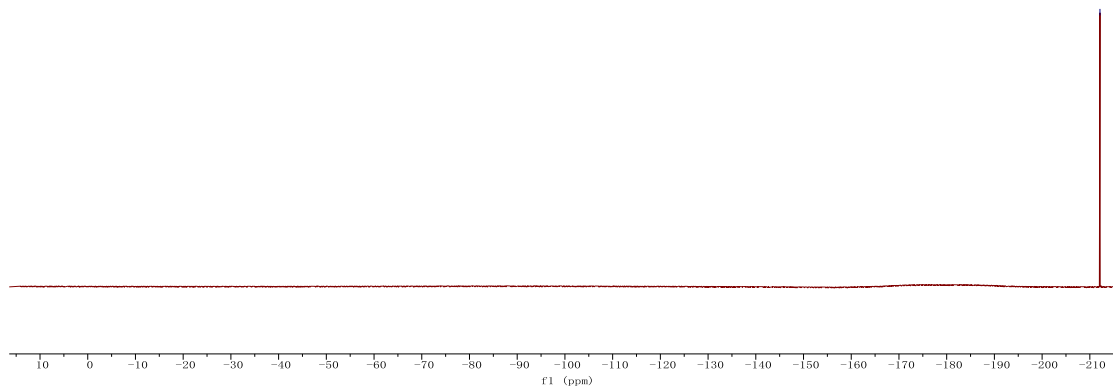

8.24  
8.24  
8.22  
8.22  
7.50  
7.49  
7.49  
7.48  
7.48  
7.47  
7.47  
7.46  
7.43  
7.43  
7.42  
7.41  
7.41  
7.40  
7.40  
7.40  
7.39  
7.38  
7.38  
7.36  
7.37  
7.36  
7.36  
7.36  
7.35  
7.35  
7.34  
7.34  
7.31  
7.31  
7.30  
7.29  
7.29  
7.29  
7.28  
4.50  
4.49  
4.48  
4.47  
4.40  
4.39  
4.38  
4.37  
4.35  
4.34  
4.28  
4.28  
4.26  
4.24  
3.75  
3.74  
3.74  
3.73  
3.72  
3.72  
3.71  
3.71  
3.64  
3.64  
3.62  
3.62  
3.56  
3.54  
3.53  
3.52

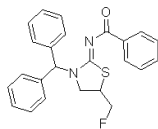

2k

<sup>1</sup>H NMR (500 MHz, in CDCl<sub>3</sub>)

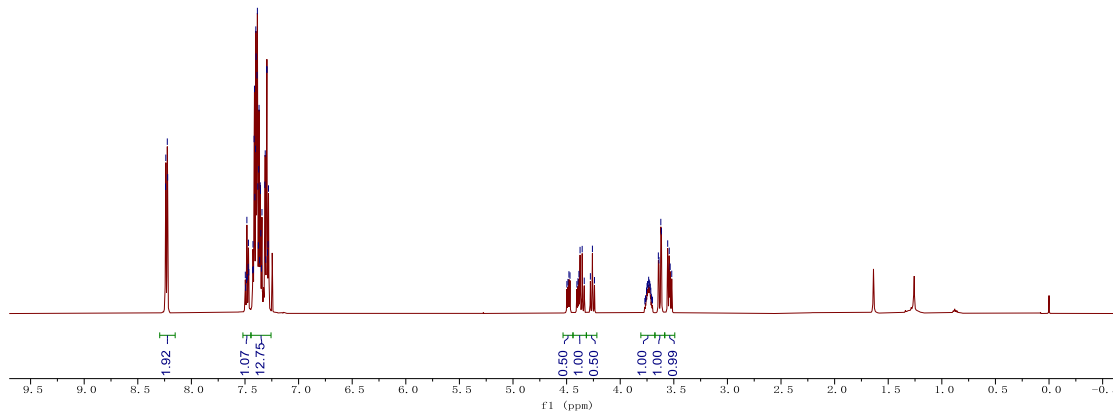

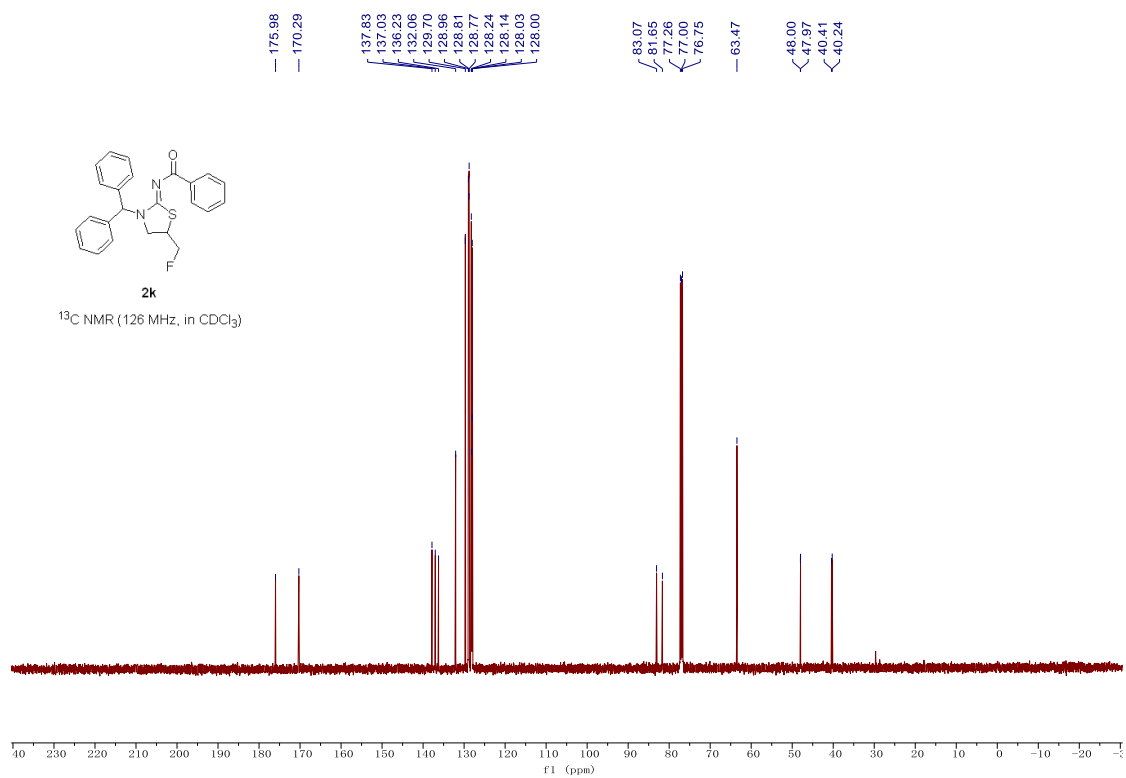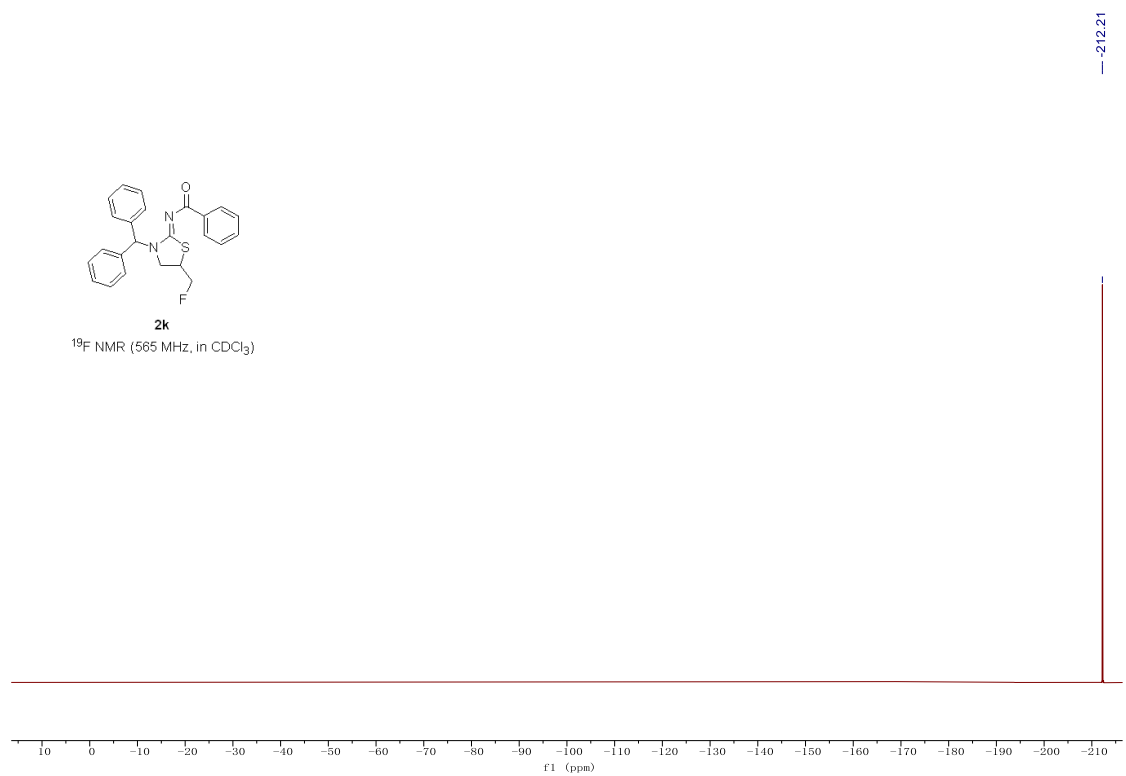

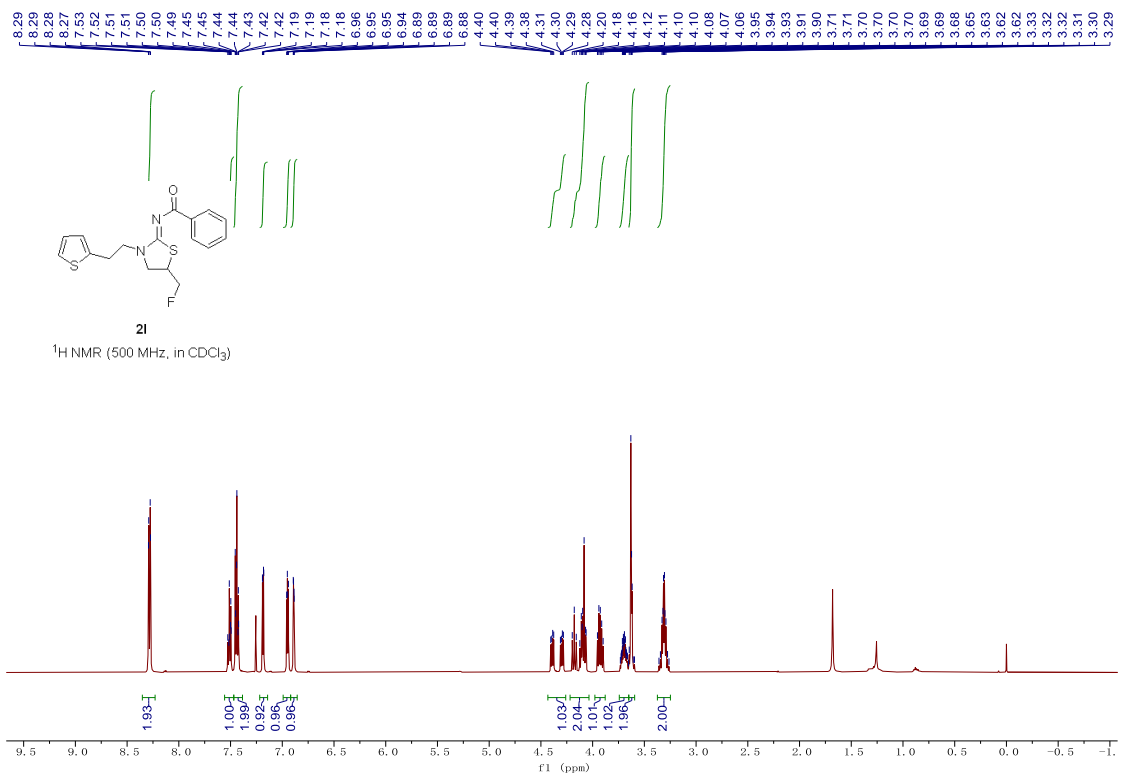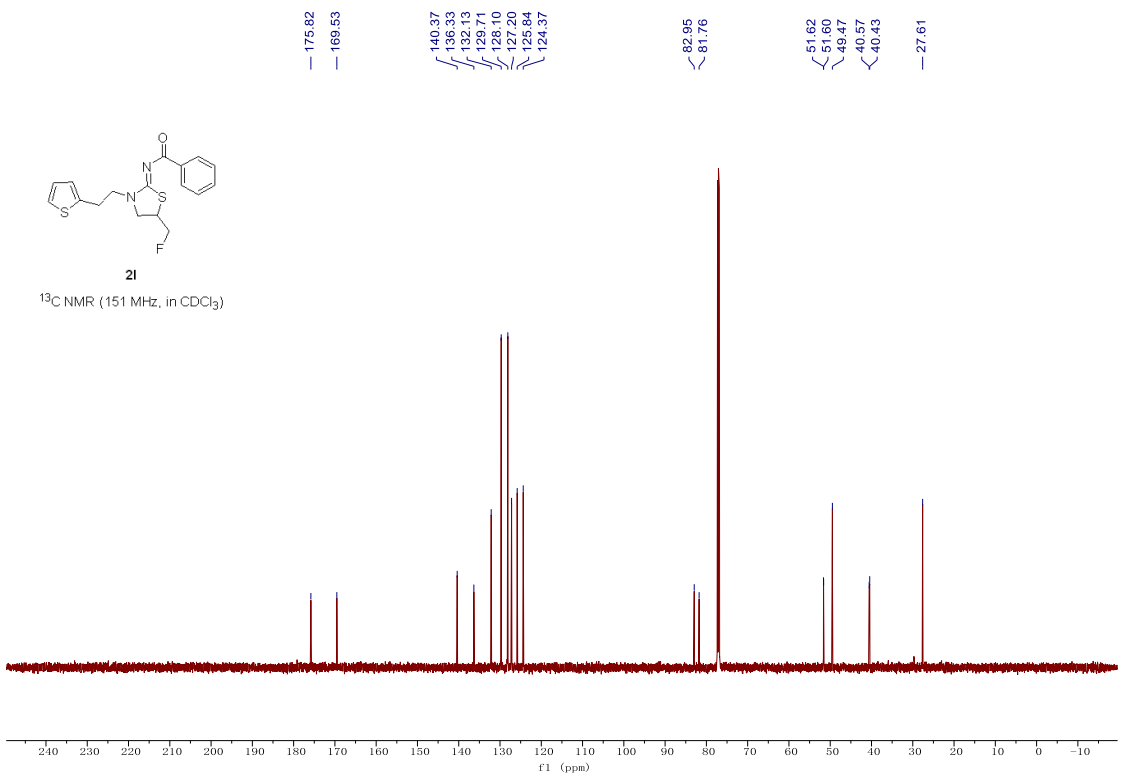

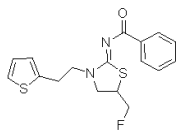

**2l**

<sup>19</sup>F NMR (565 MHz, in CDCl<sub>3</sub>)

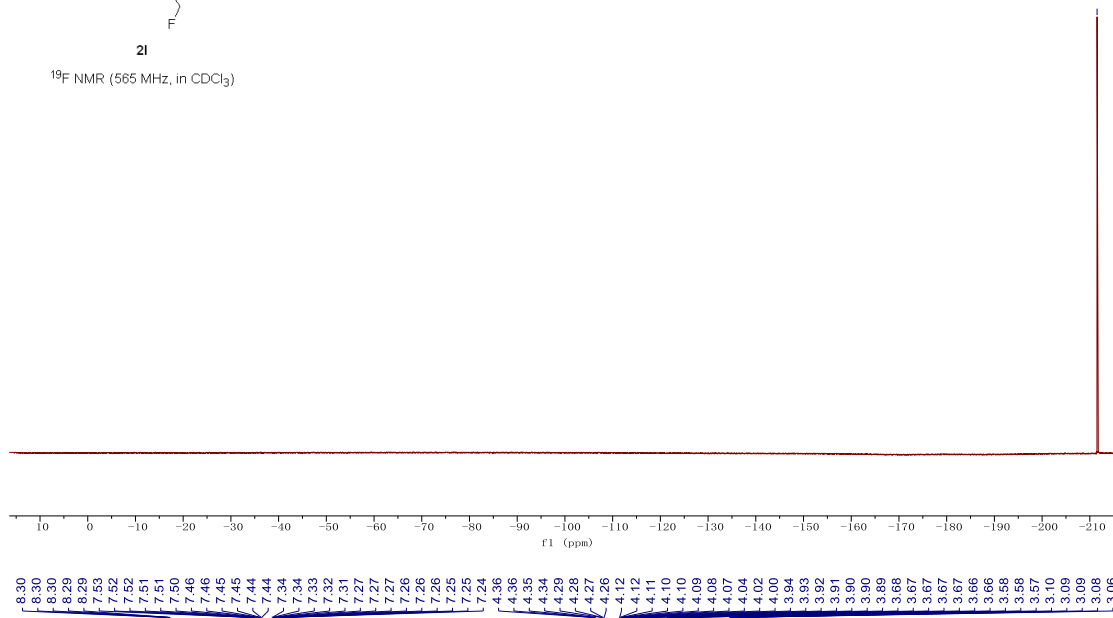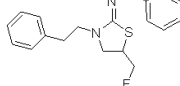

**2m**

<sup>1</sup>H NMR (600 MHz, in CDCl<sub>3</sub>)

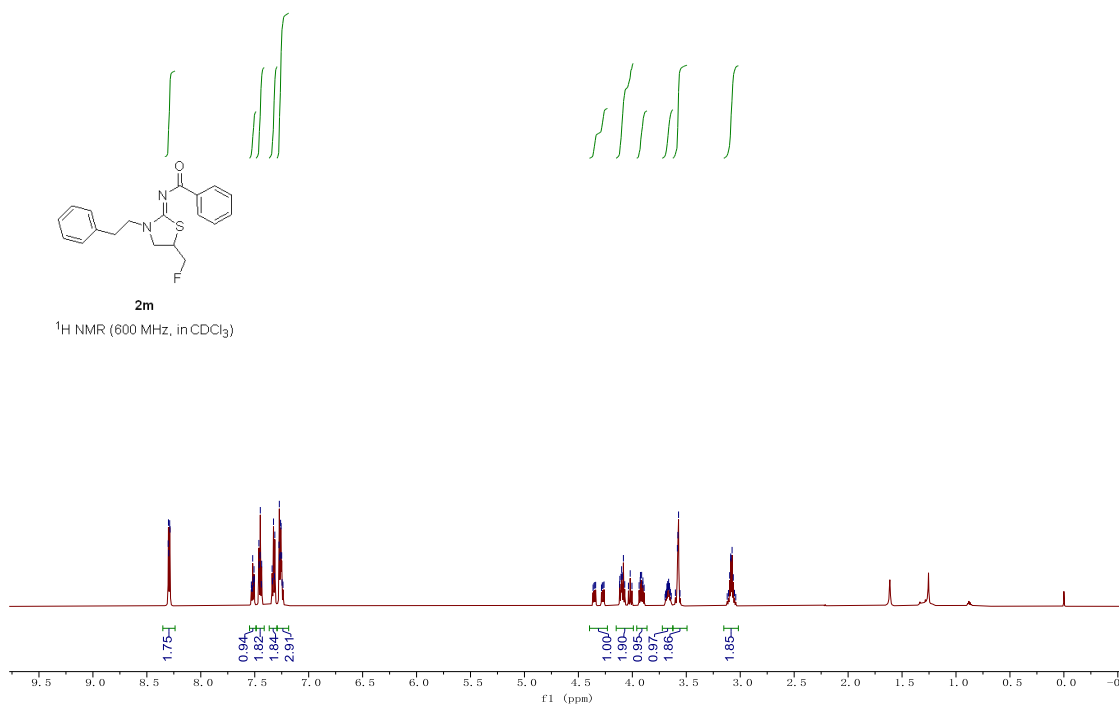

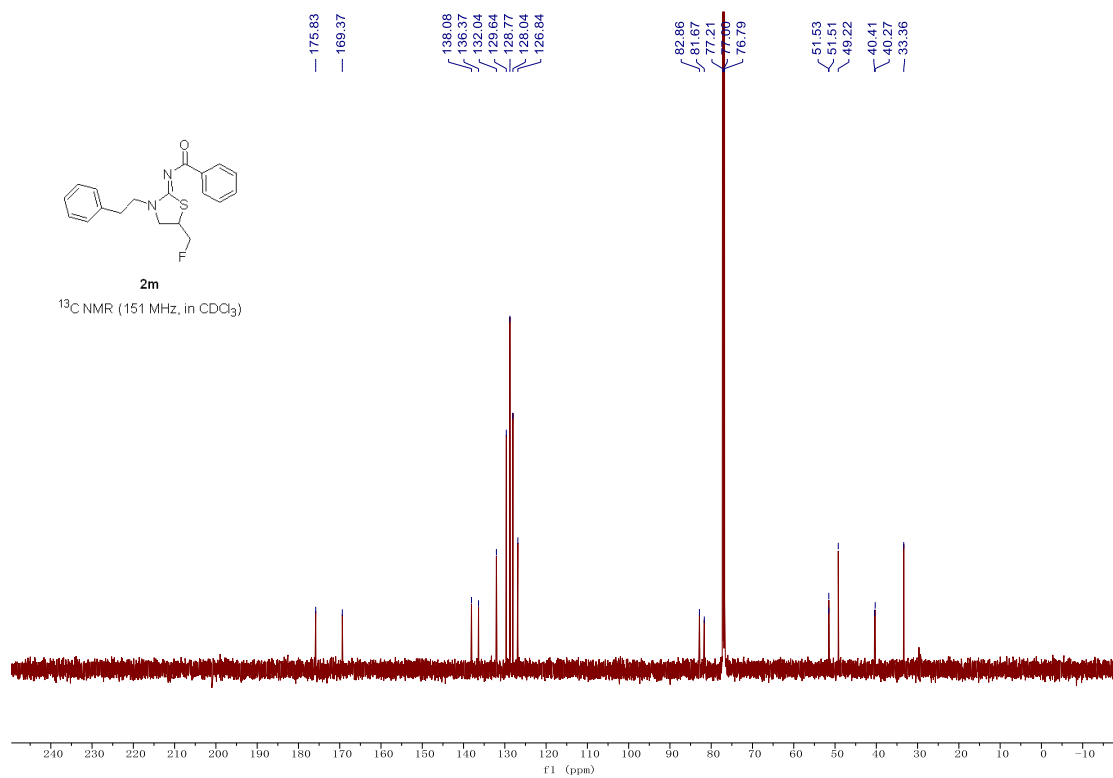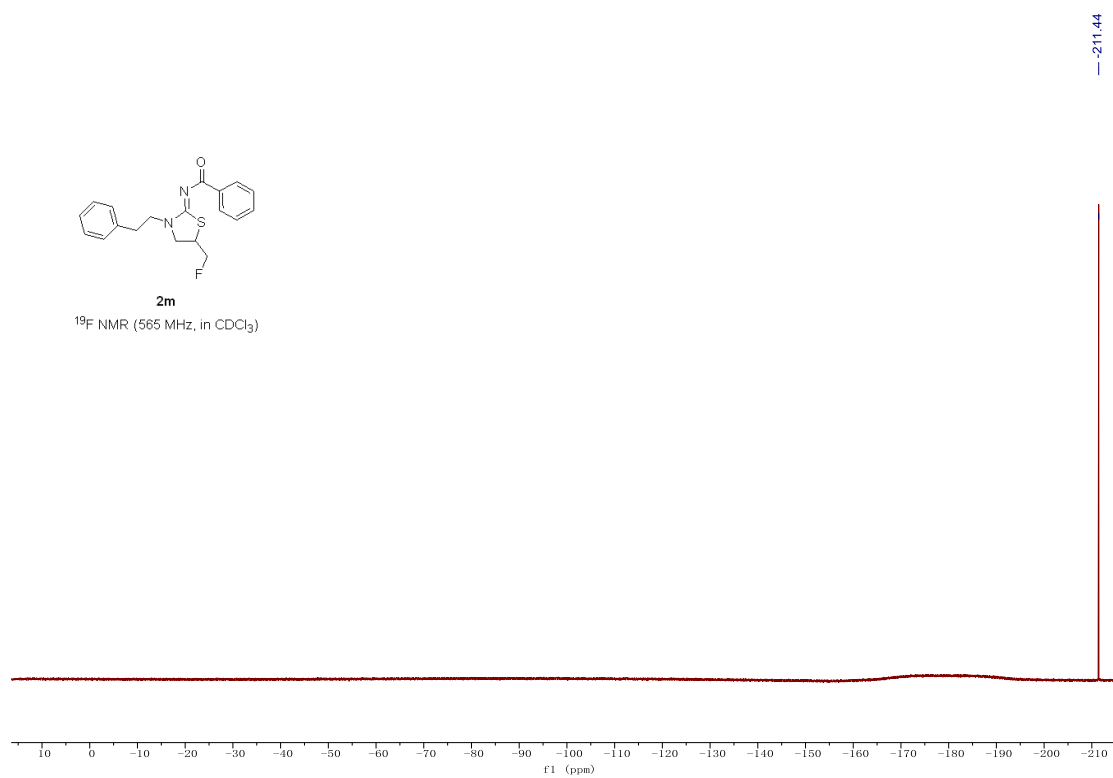

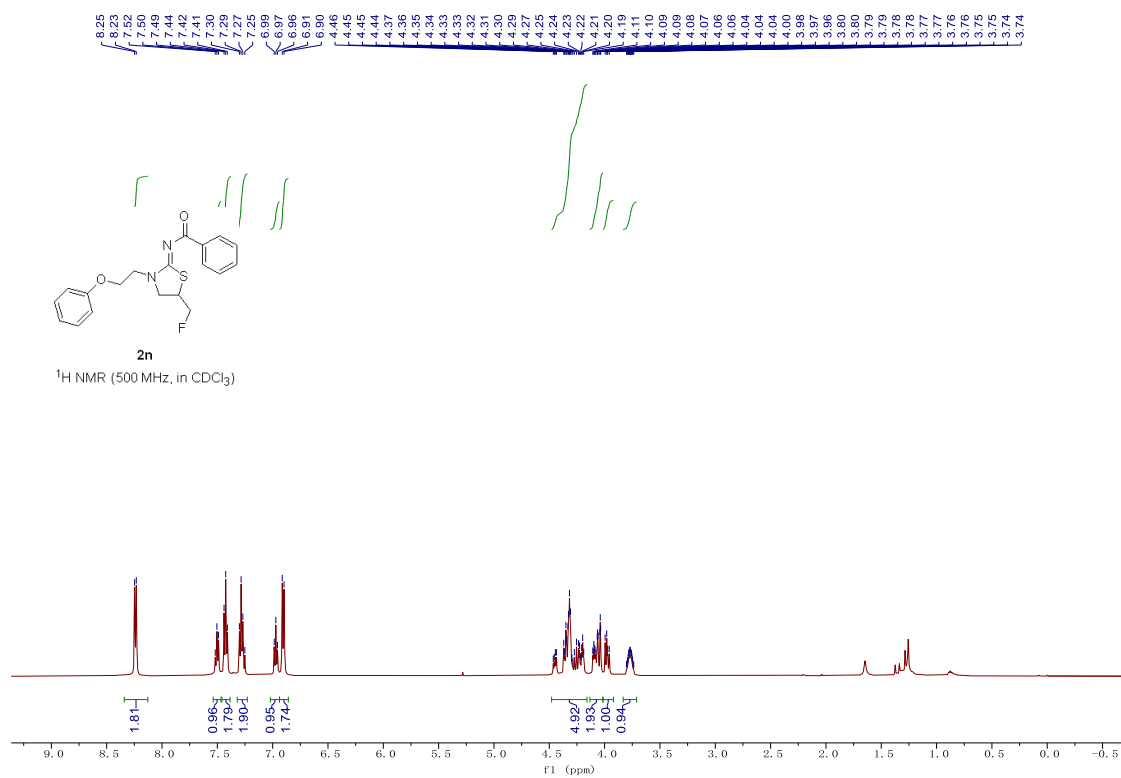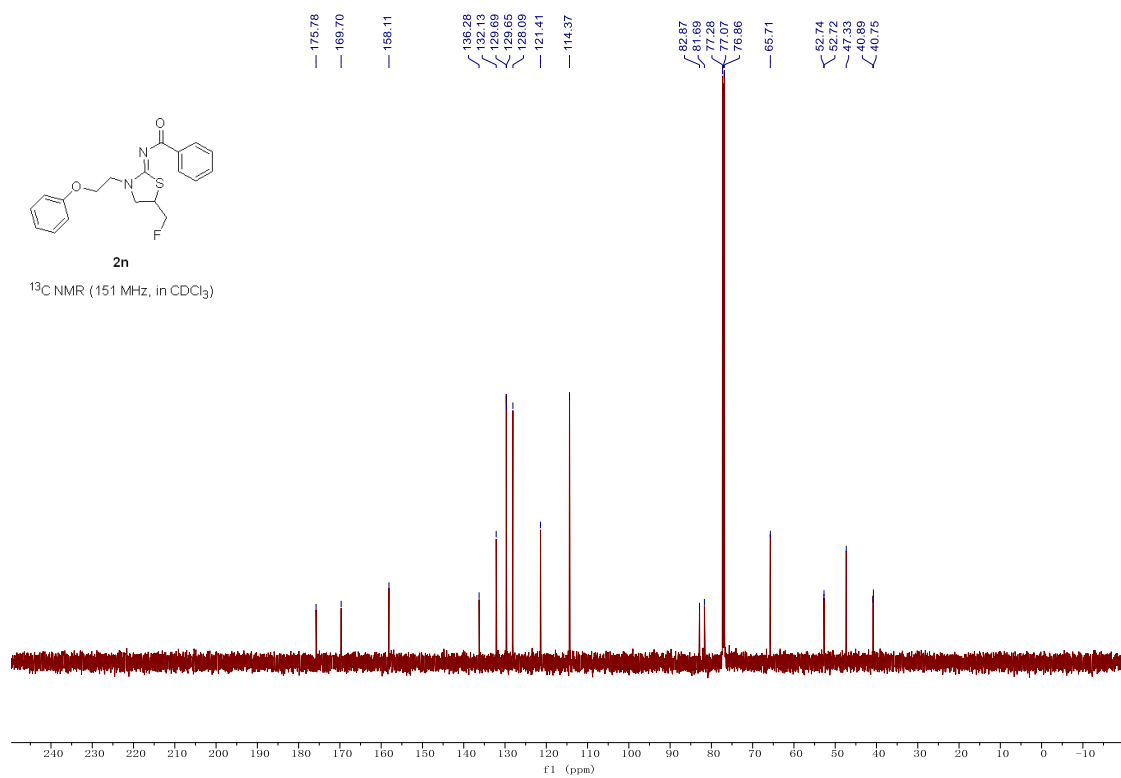

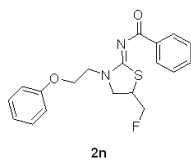

<sup>19</sup>F NMR (565 MHz, in CDCl<sub>3</sub>)

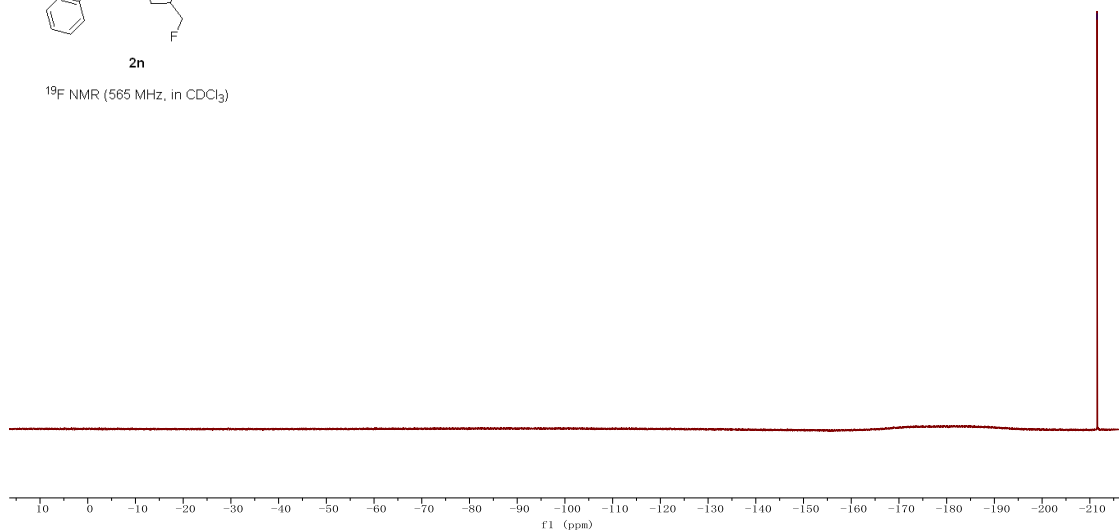

-211.51

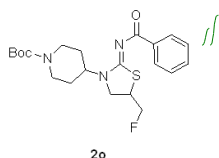

<sup>1</sup>H NMR (500 MHz, in CDCl<sub>3</sub>)

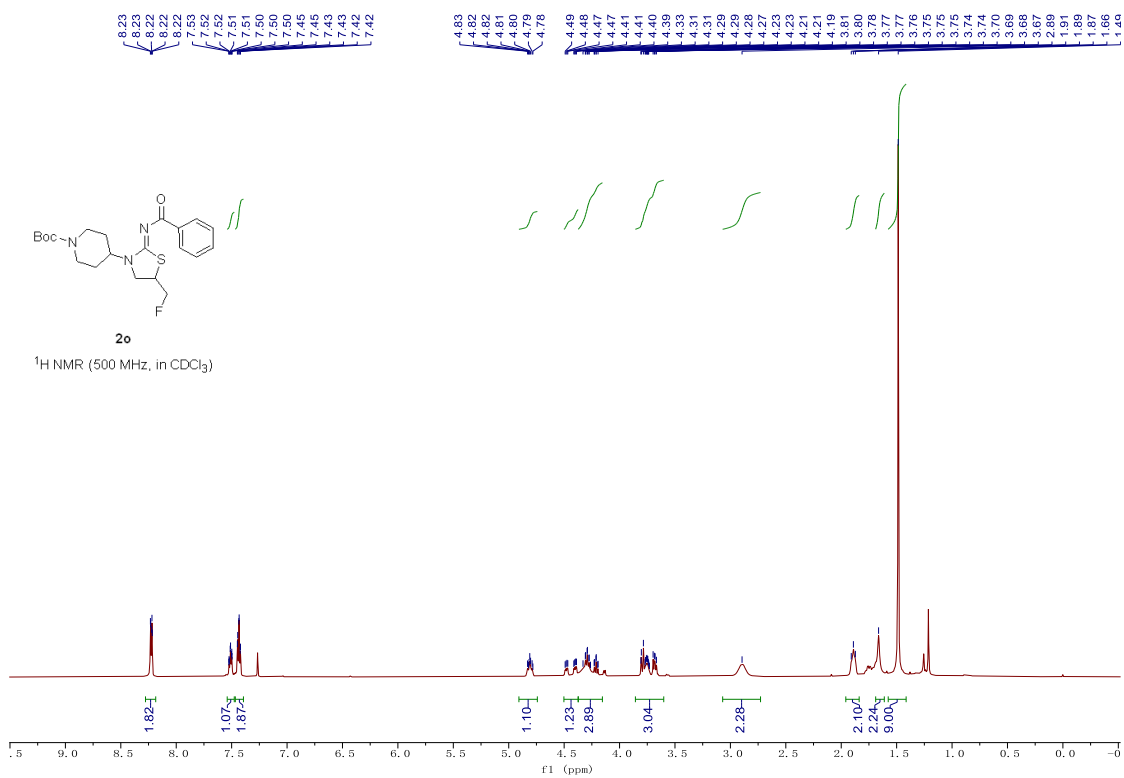

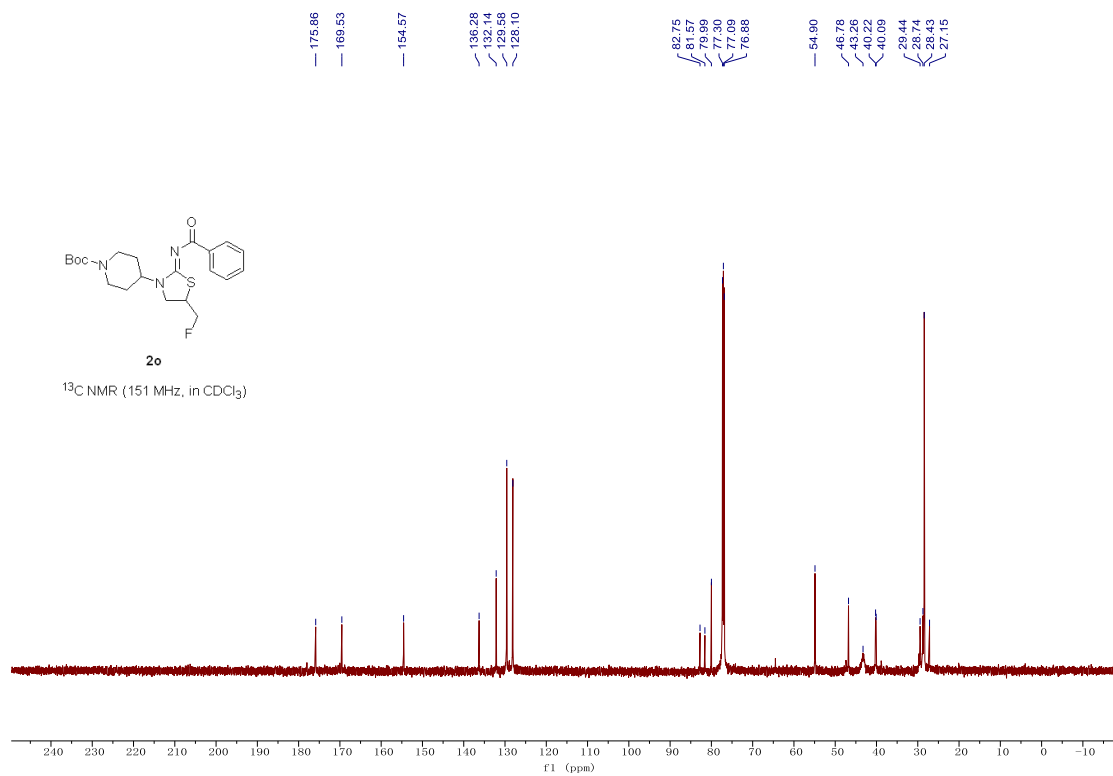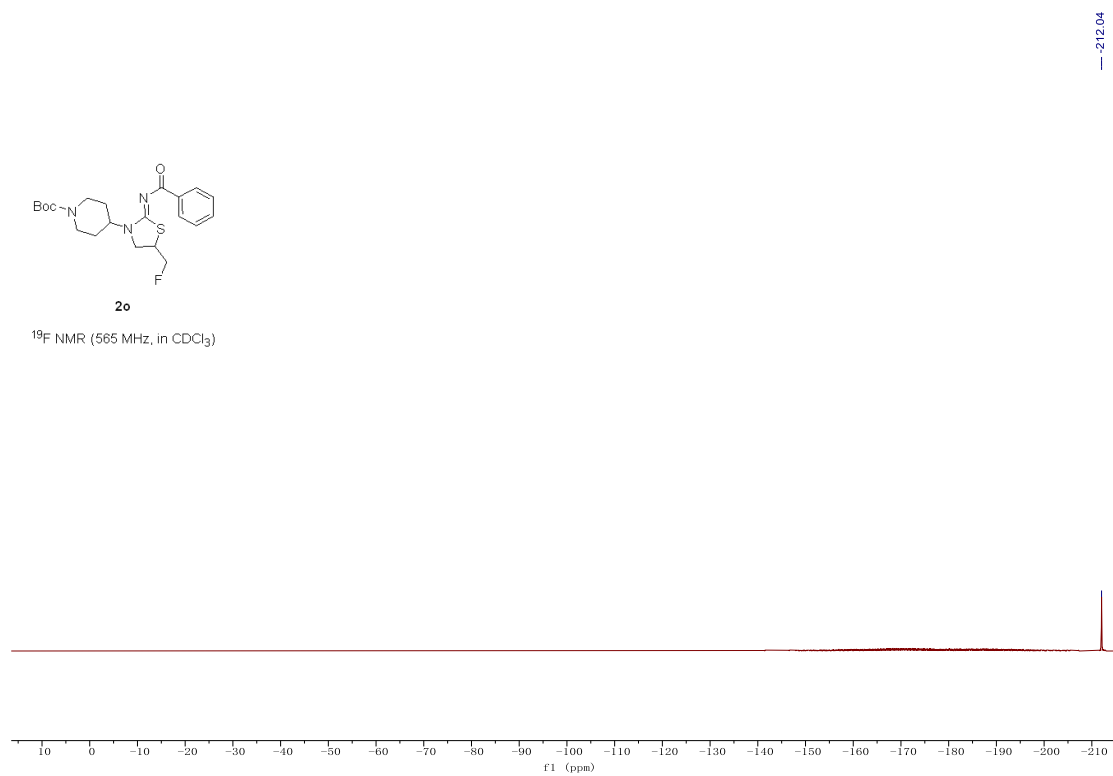



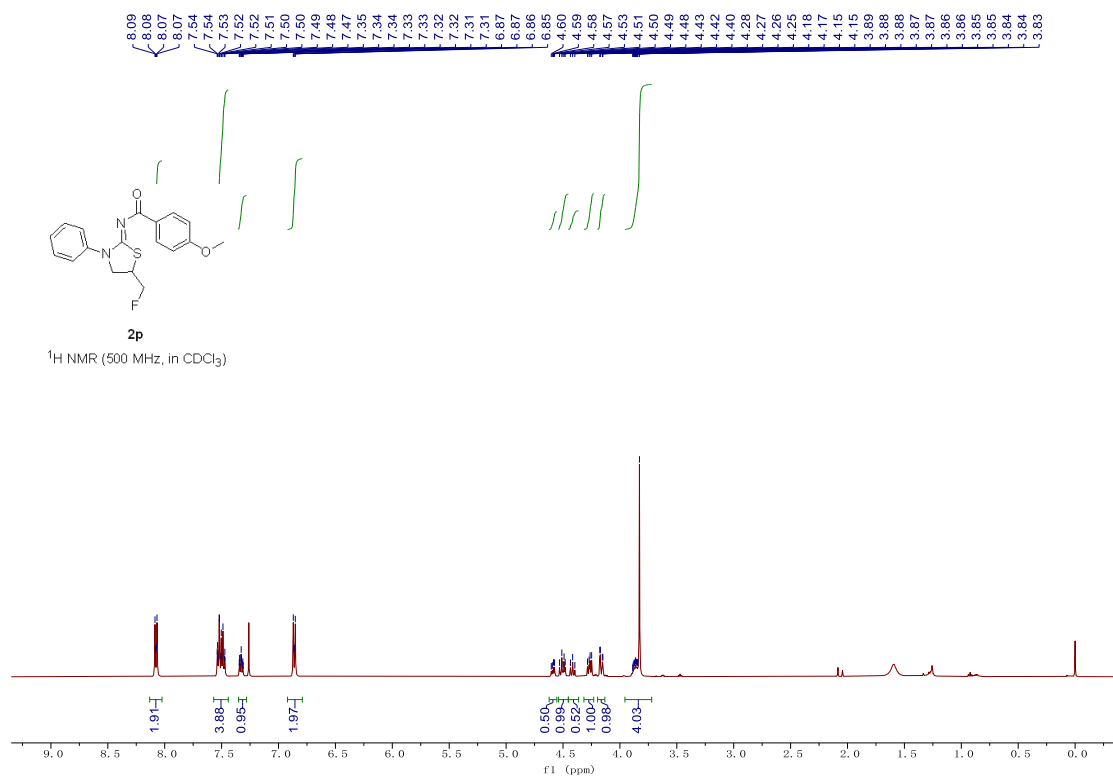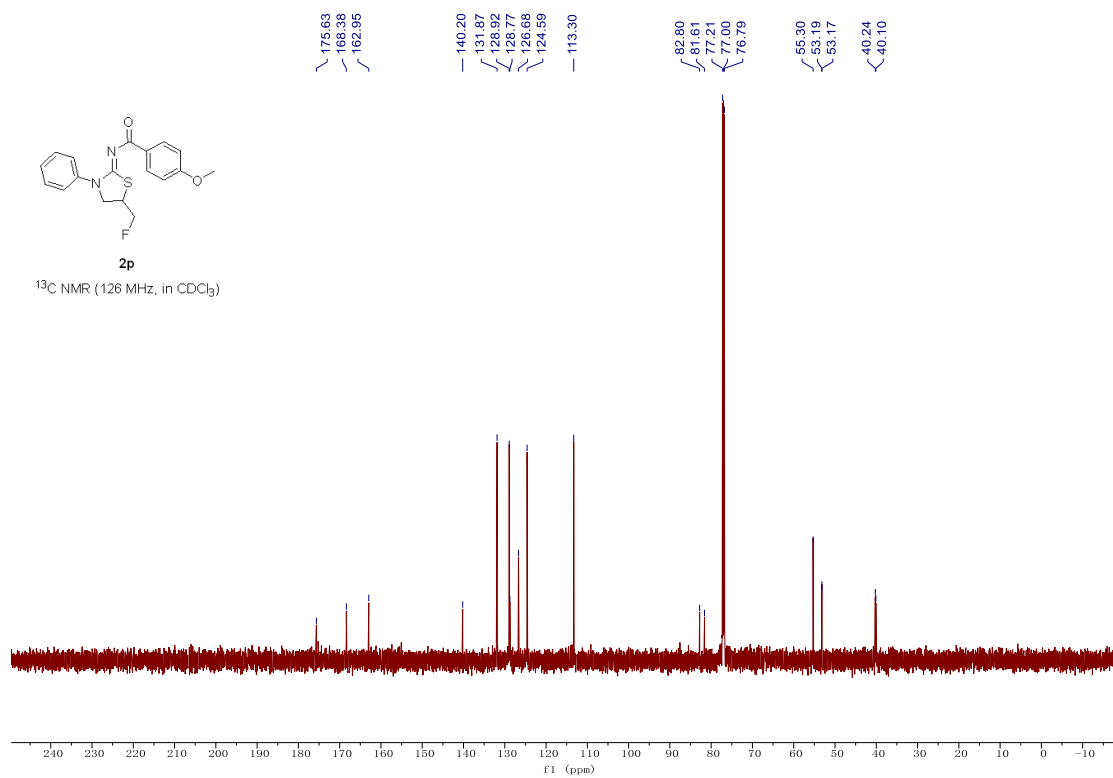

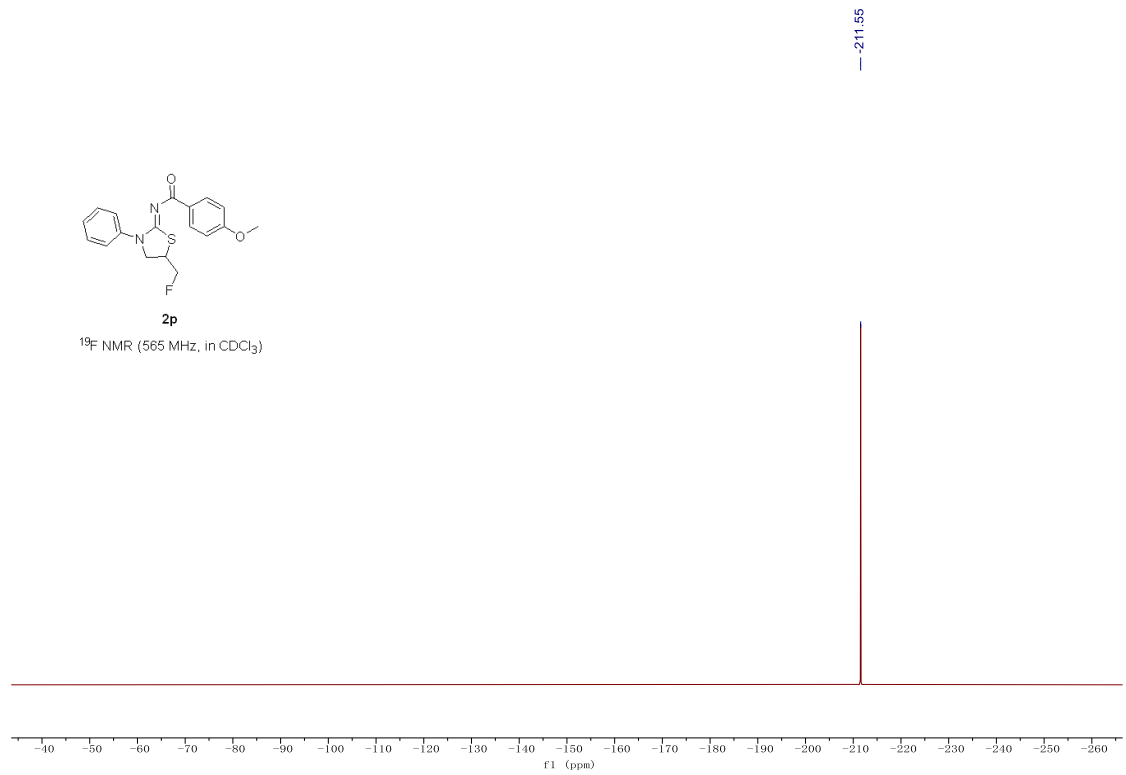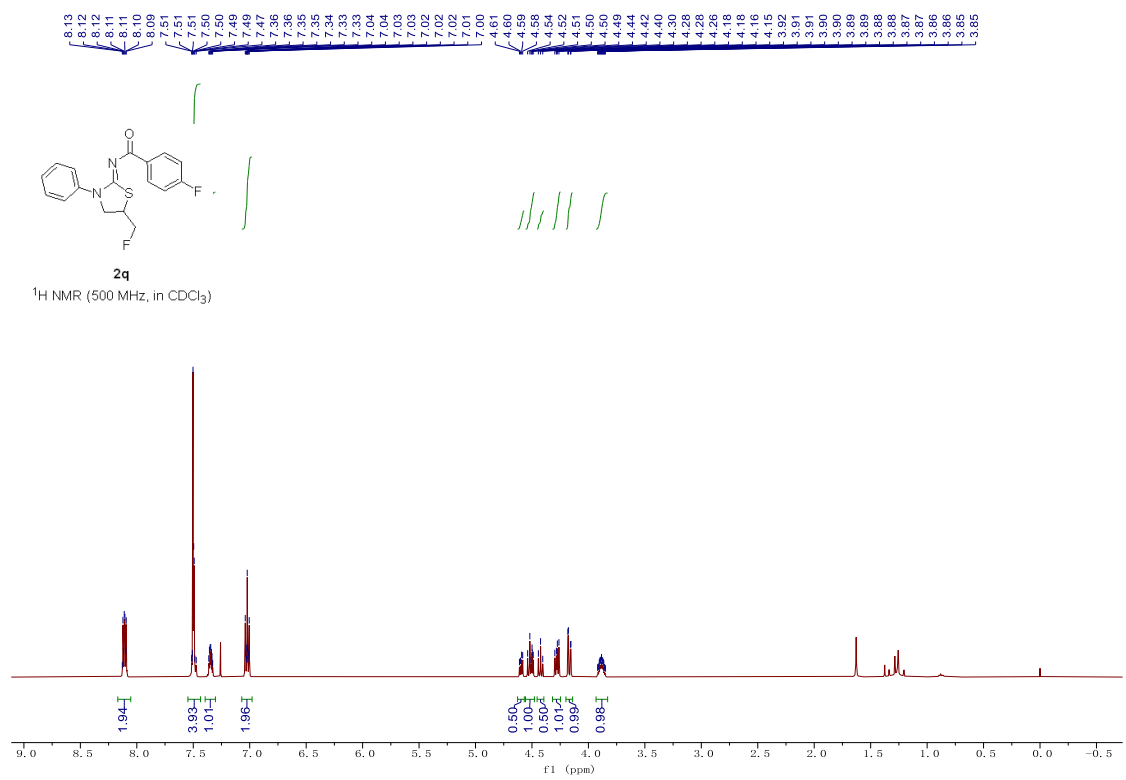

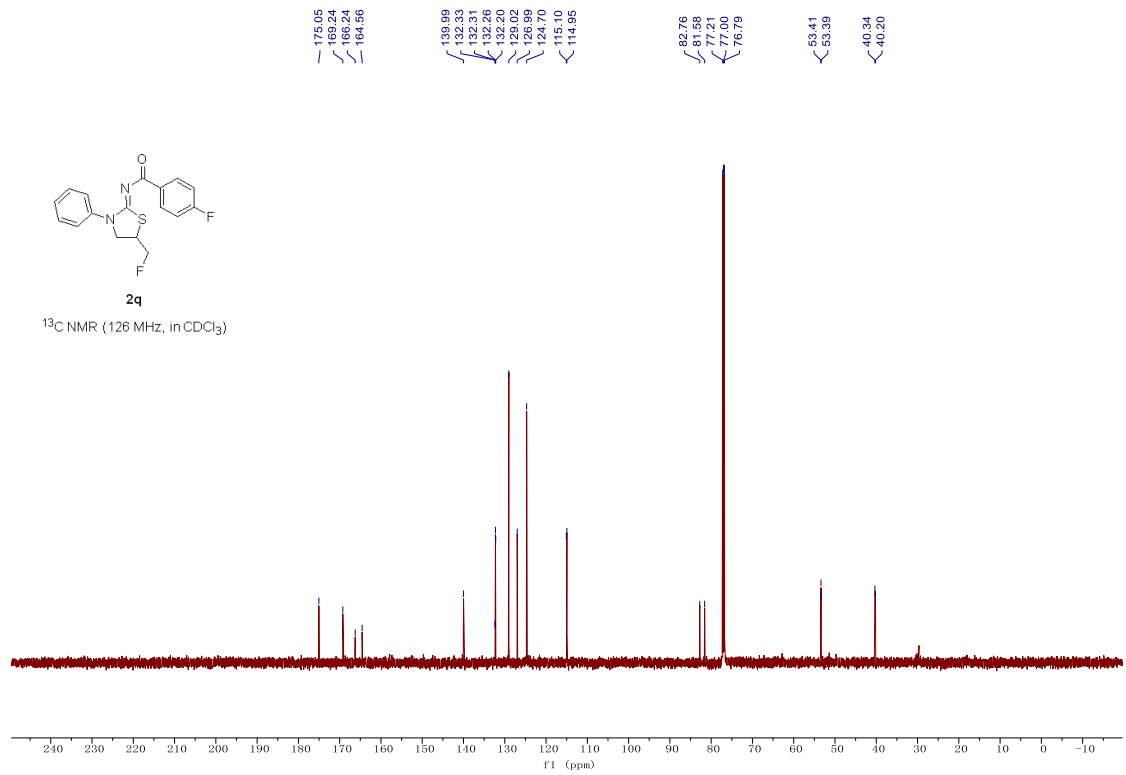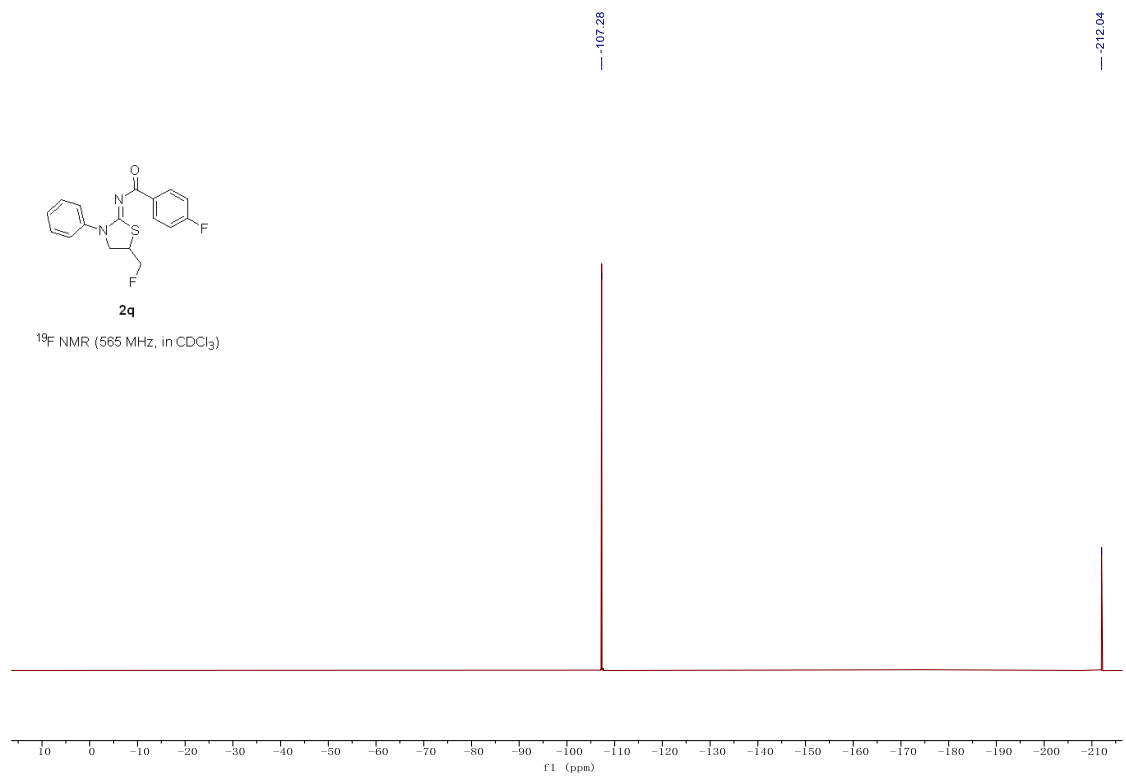

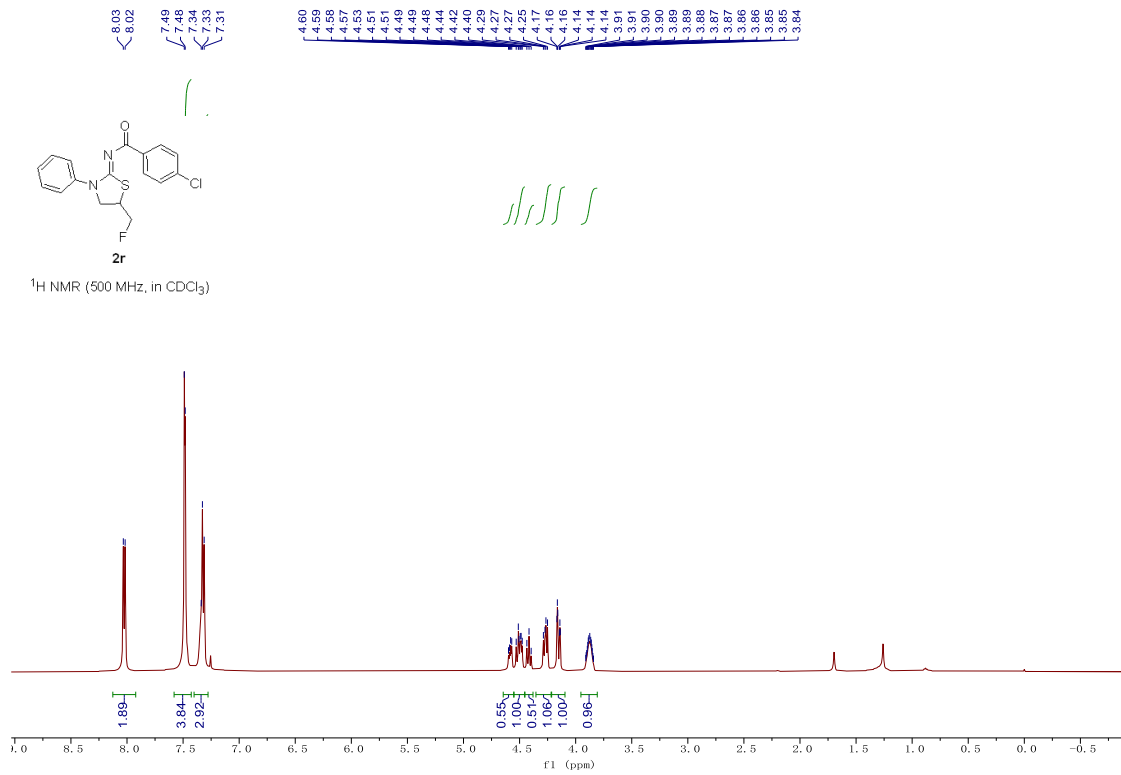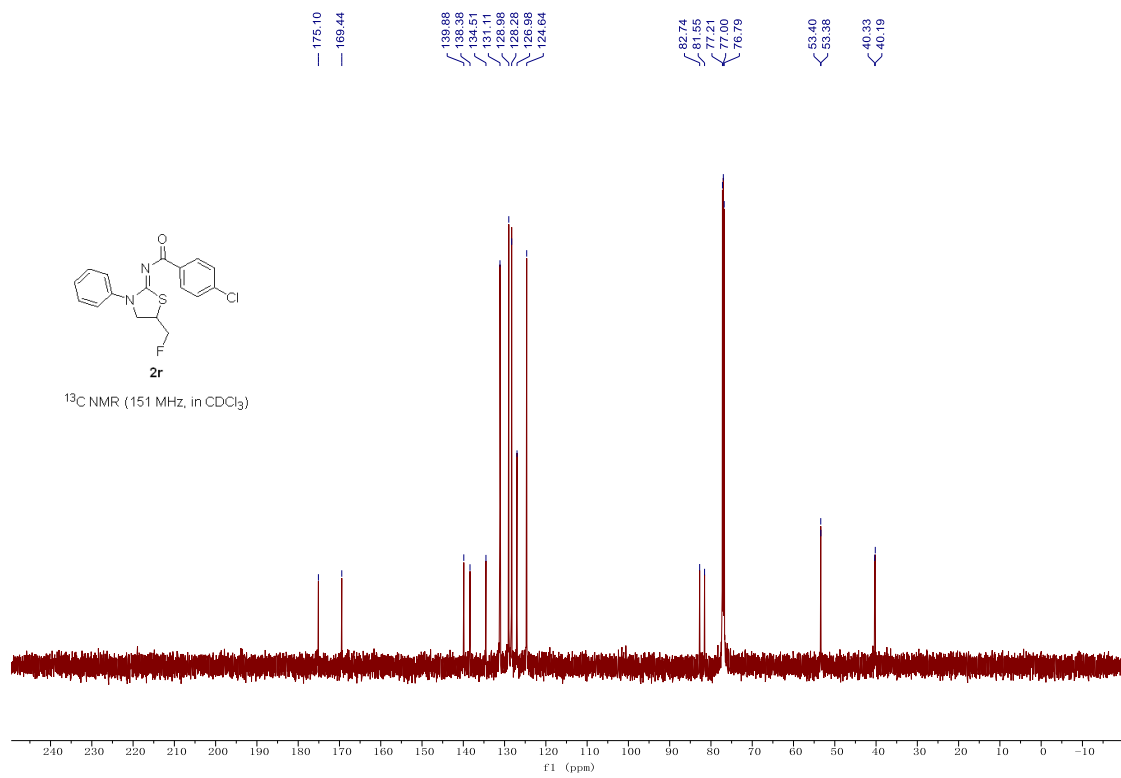

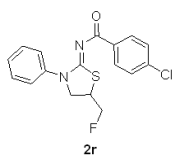

<sup>19</sup>F NMR (565 MHz, in CDCl<sub>3</sub>)

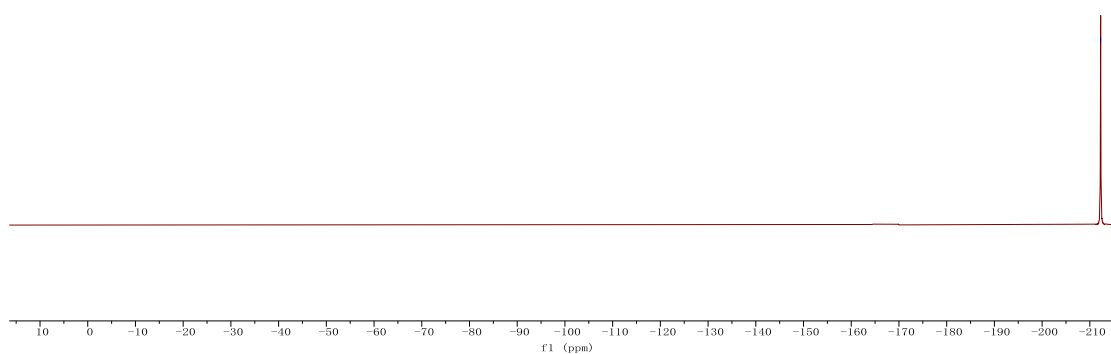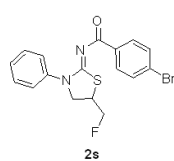

<sup>1</sup>H NMR (500 MHz, in CDCl<sub>3</sub>)

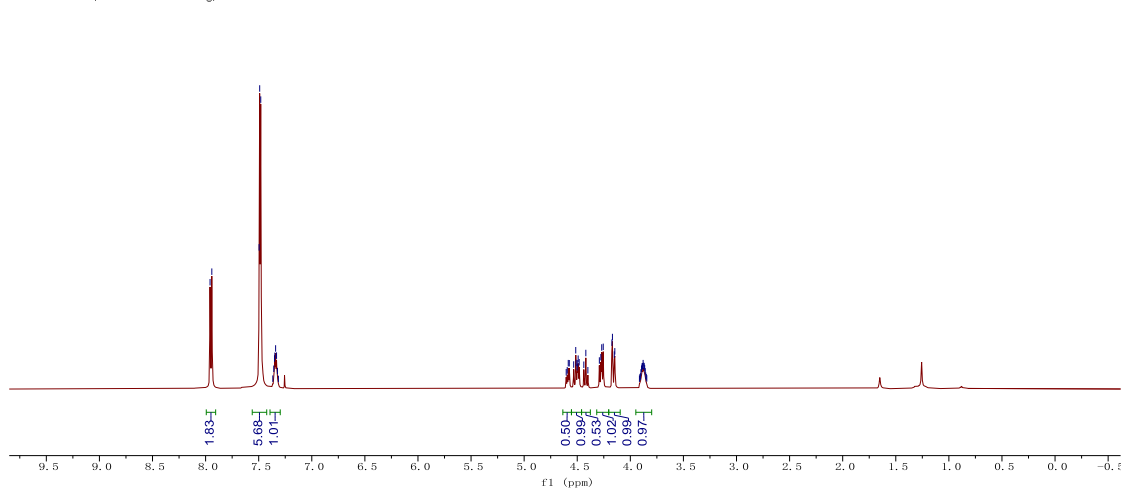

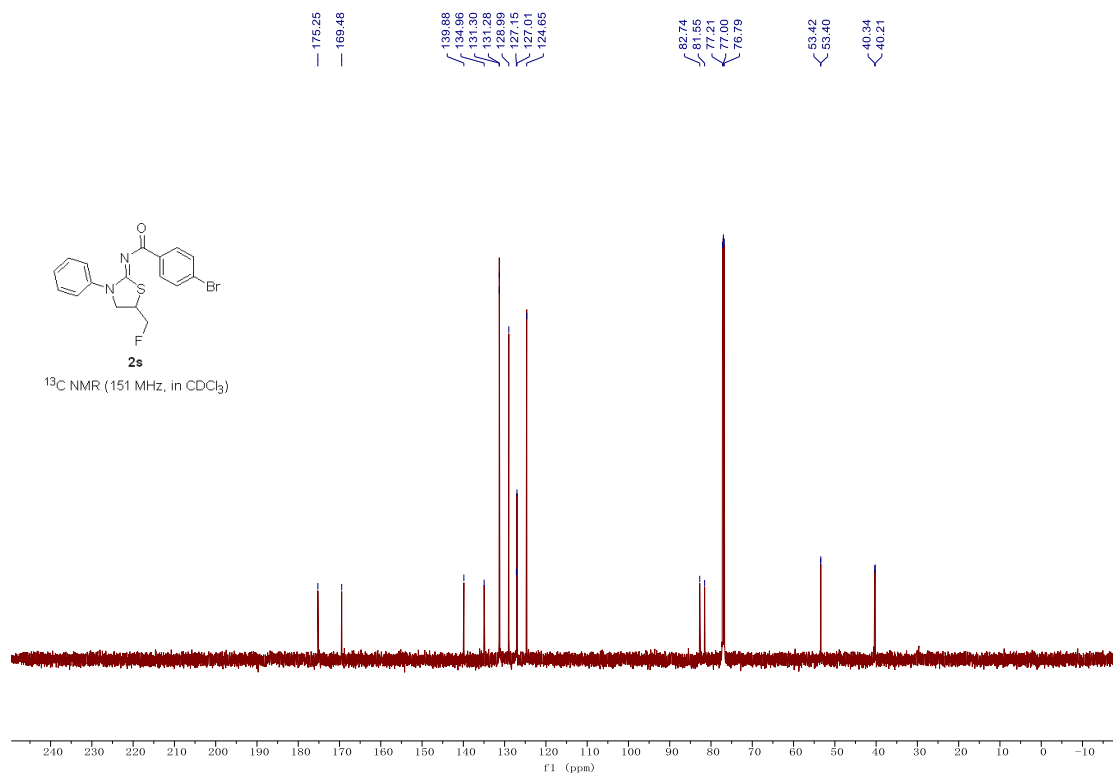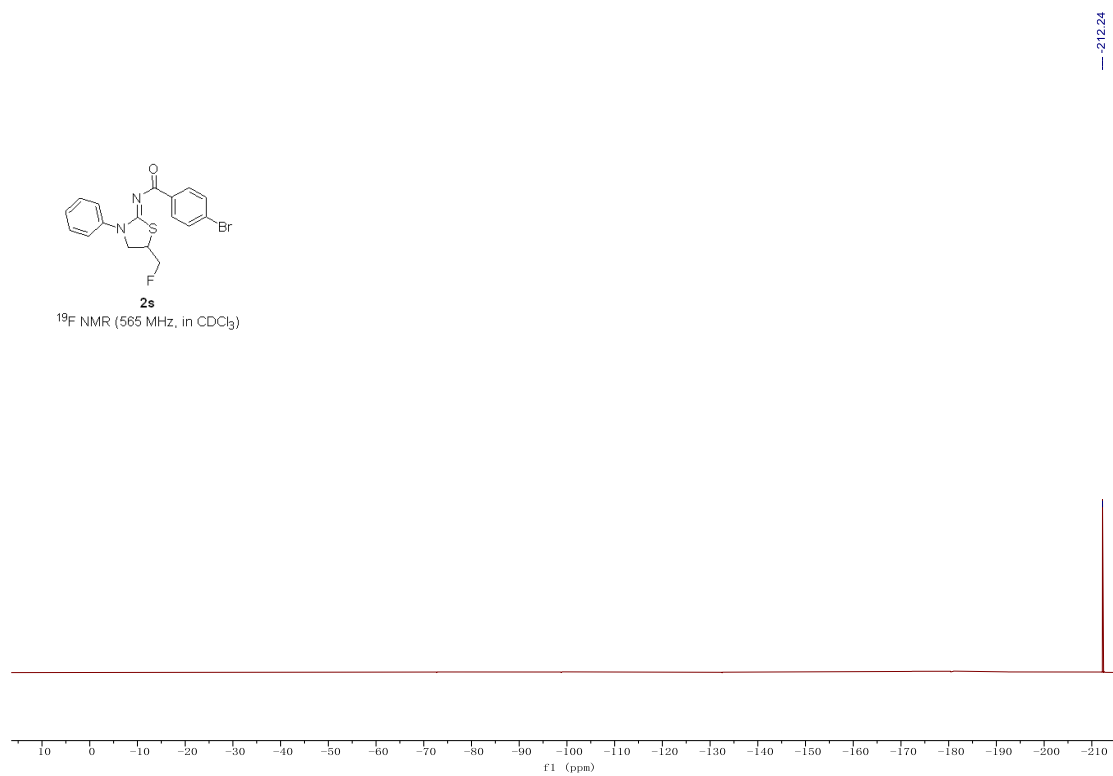

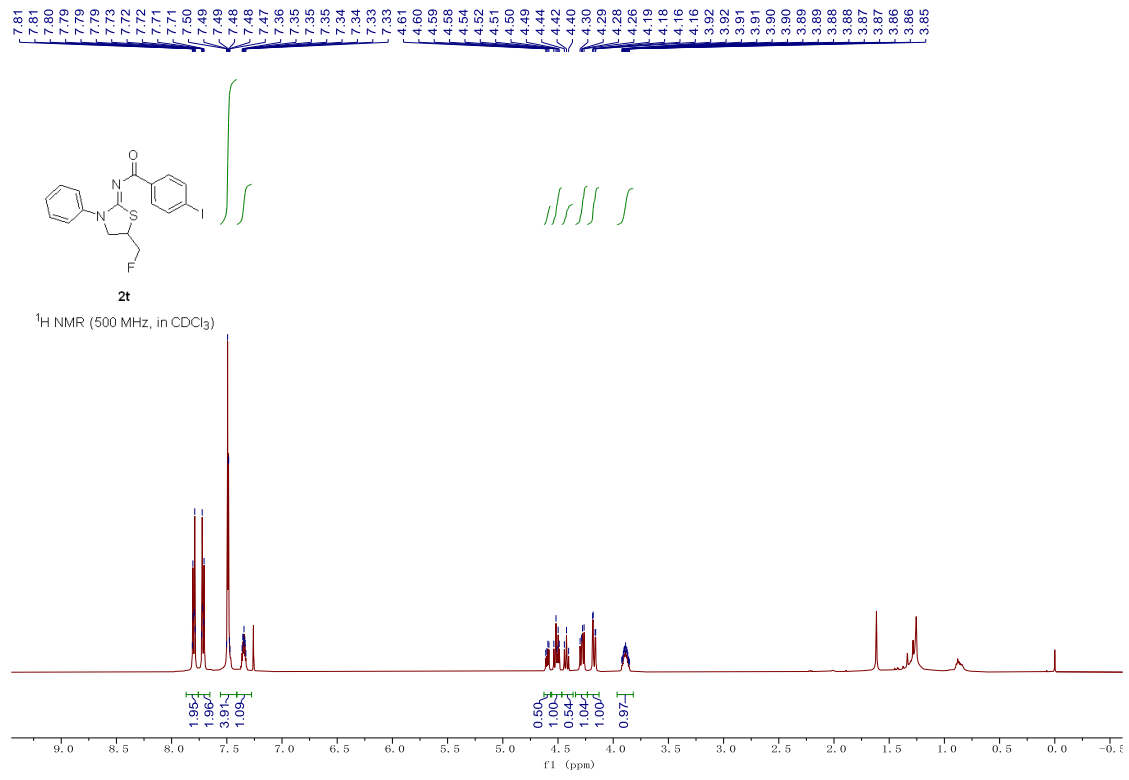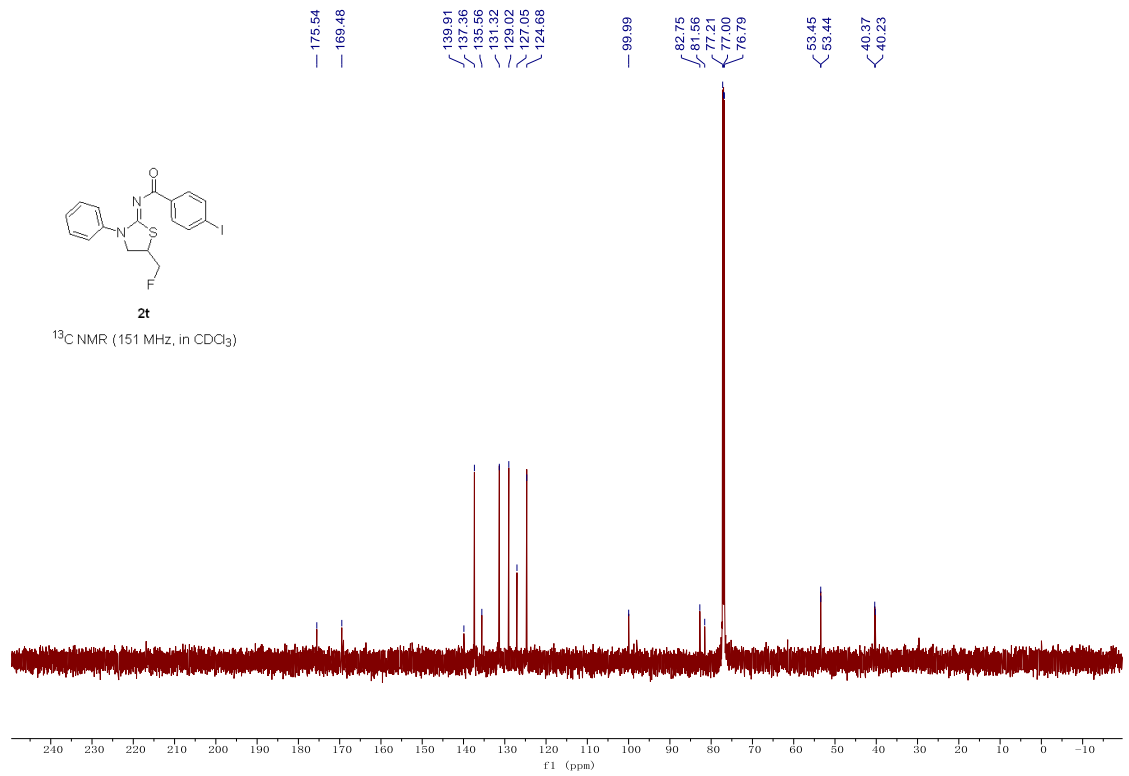

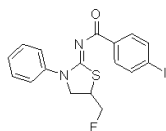

**2t**

<sup>19</sup>F NMR (565 MHz, in CDCl<sub>3</sub>)

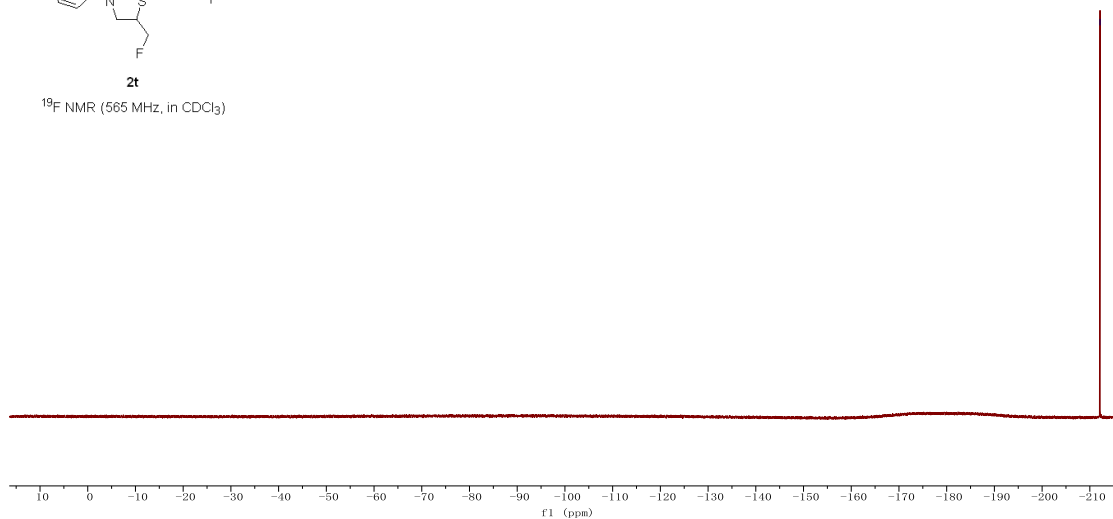

8.15  
8.14  
8.14  
8.04  
8.04  
8.03  
8.02  
7.52  
7.51  
7.50  
7.38  
7.36  
7.37  
7.36  
7.36  
7.35  
7.35  
4.63  
4.62  
4.61  
4.60  
4.55  
4.53  
4.52  
4.51  
4.50  
4.46  
4.44  
4.42  
4.32  
4.31  
4.30  
4.29  
4.21  
4.20  
4.19  
4.18  
3.94  
3.94  
3.93  
3.93  
3.92  
3.92  
3.91  
3.90  
3.90  
3.89  
3.89  
3.88  
3.88  
3.88

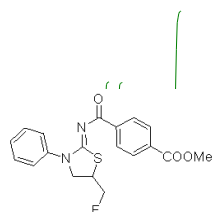

**2u**

<sup>1</sup>H NMR (500 MHz, in CDCl<sub>3</sub>)

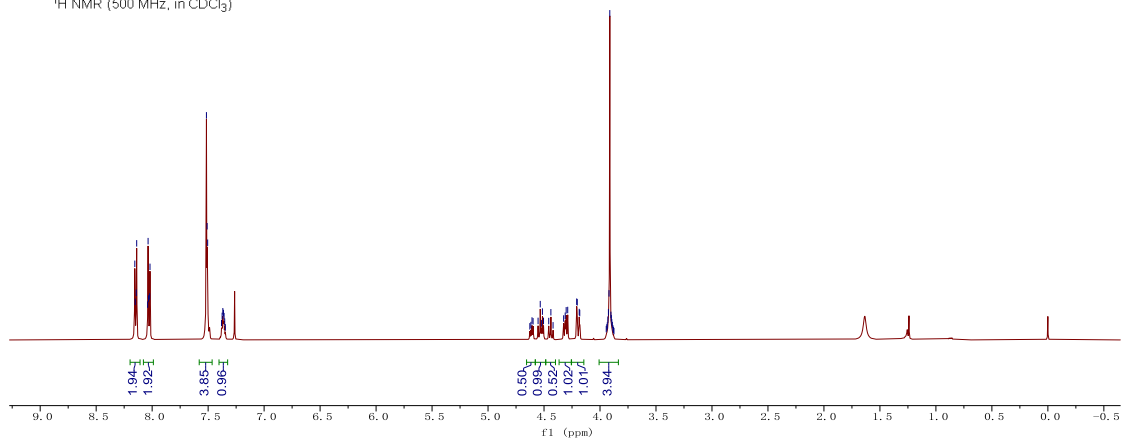



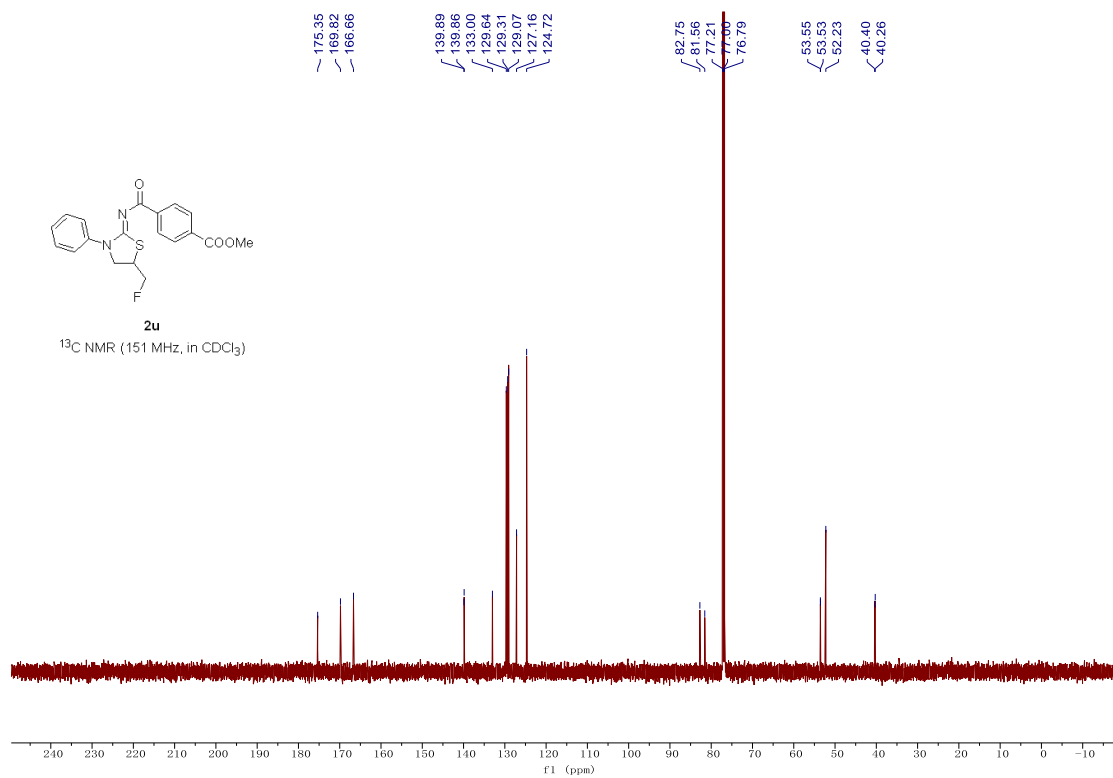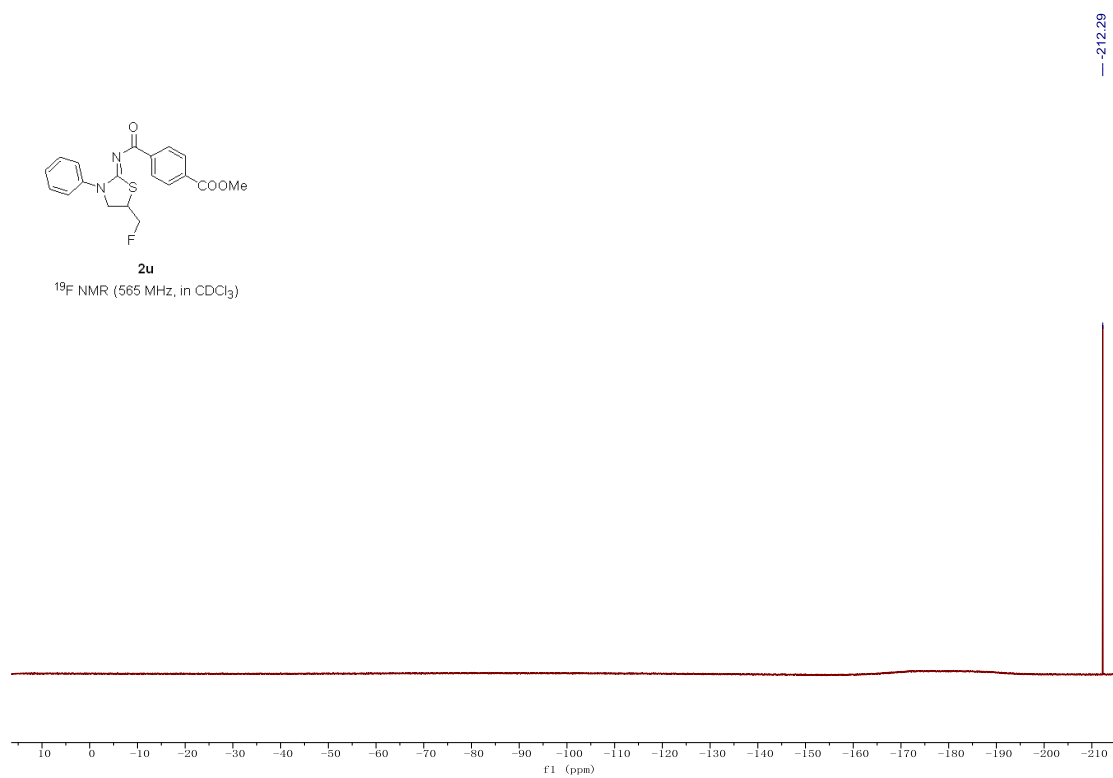

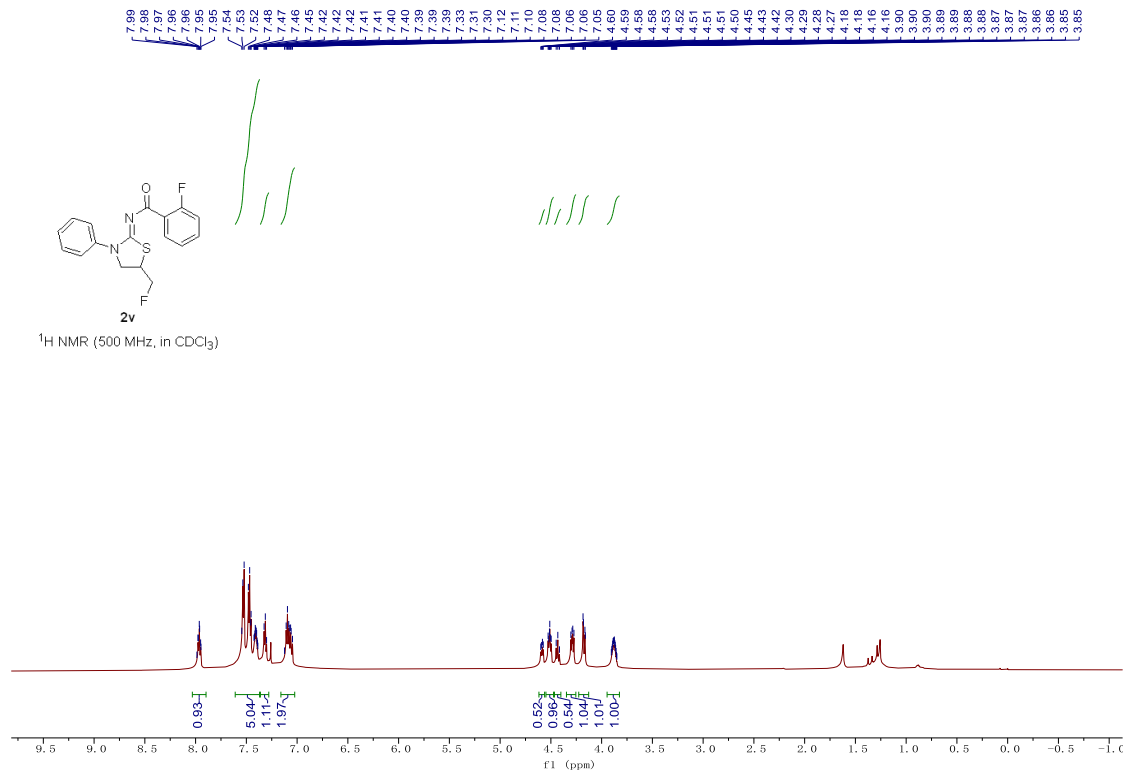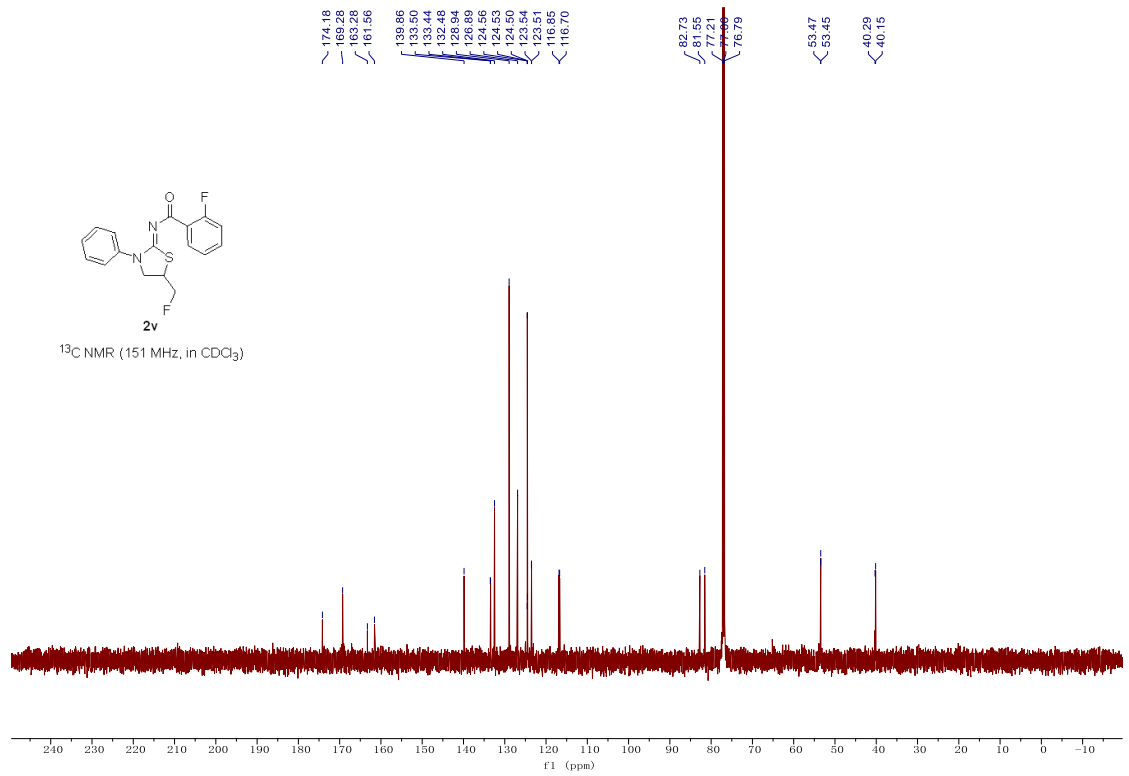

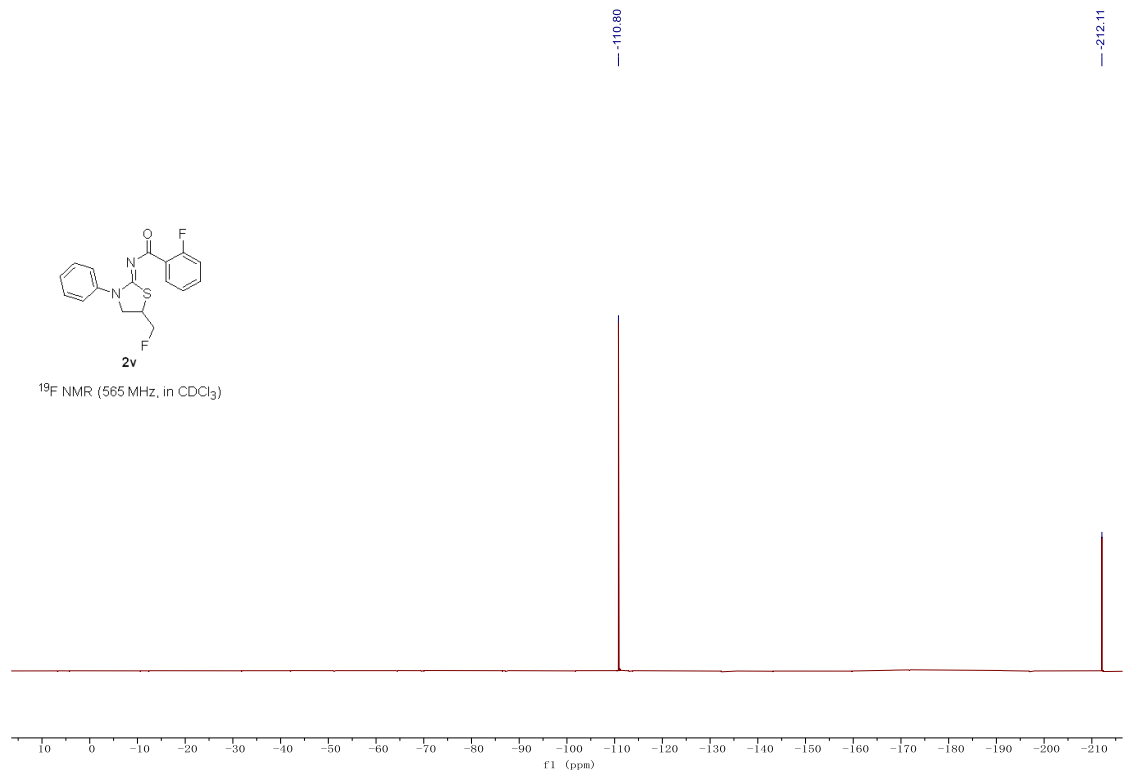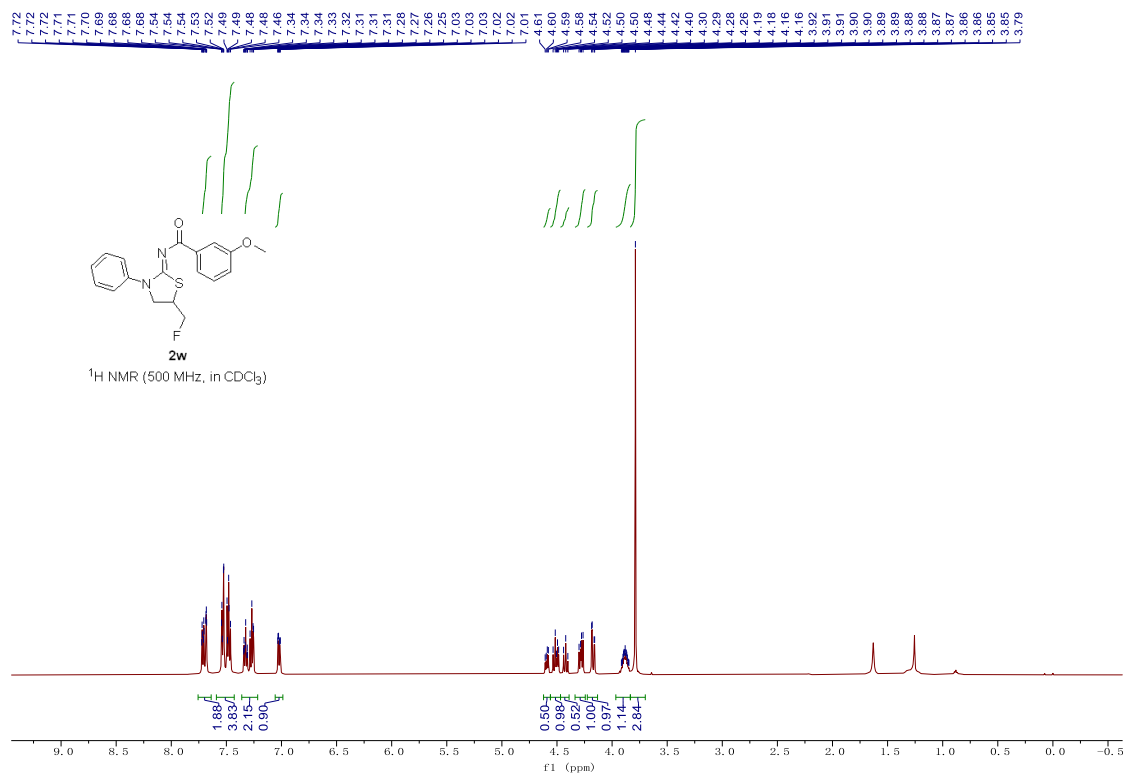

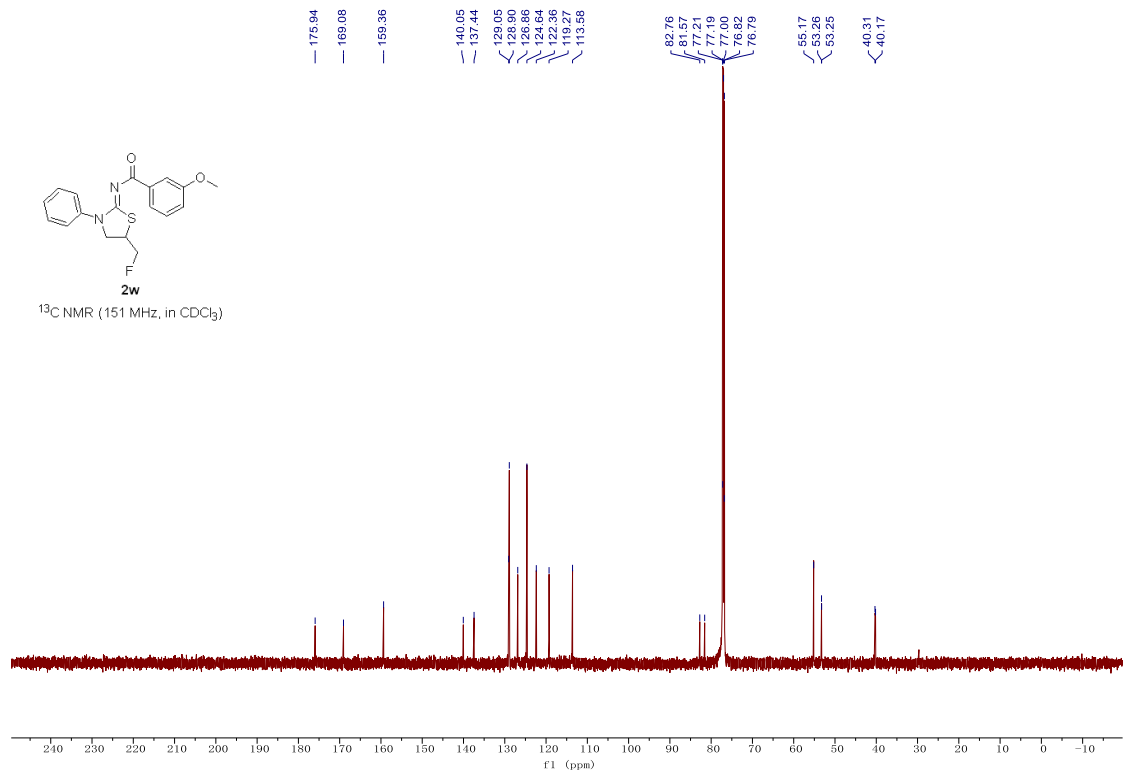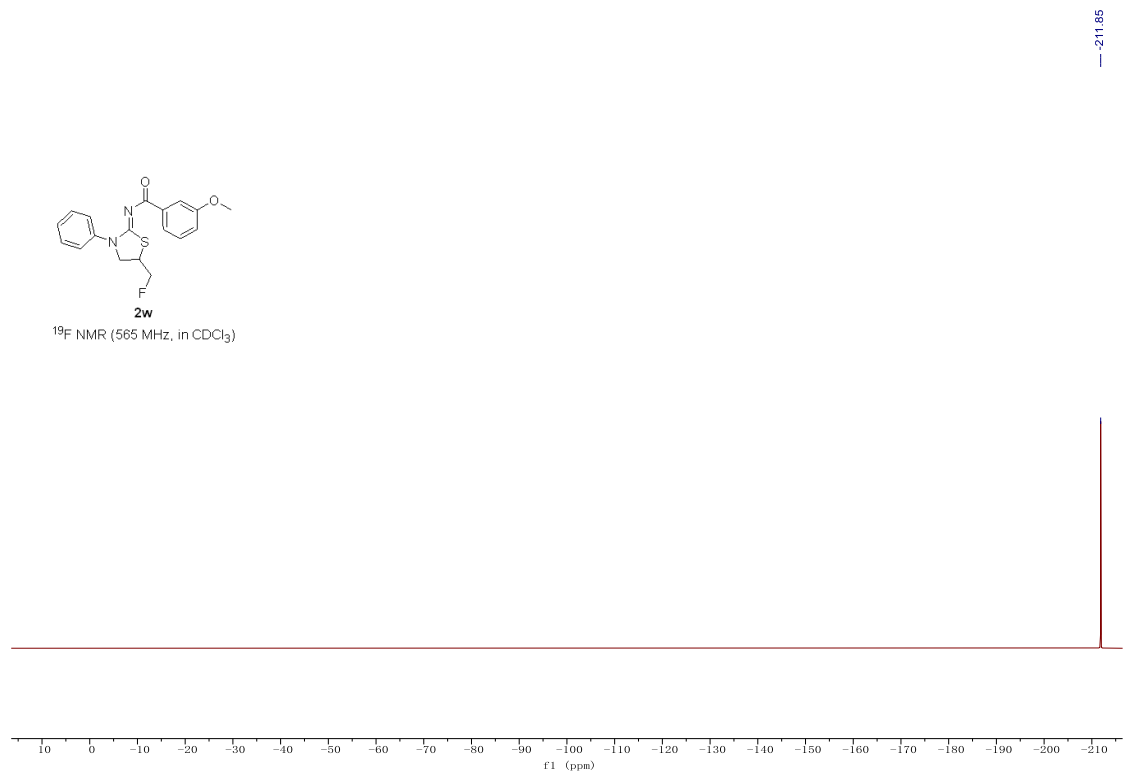

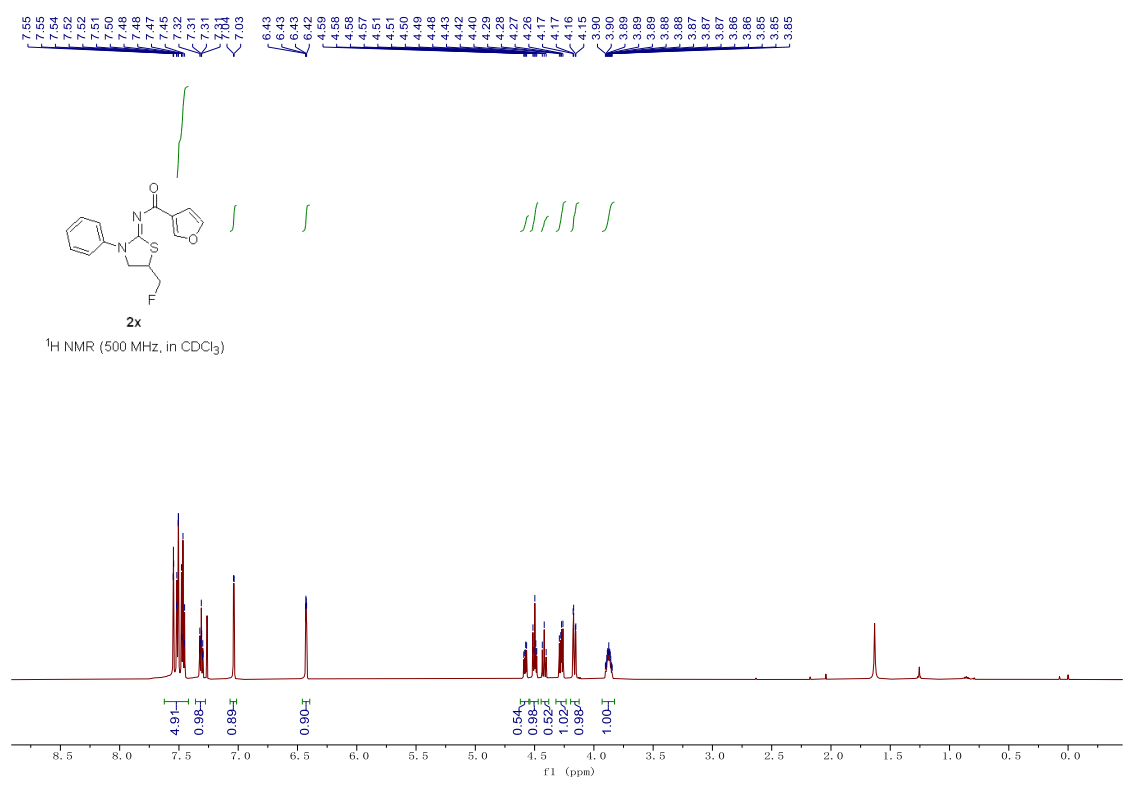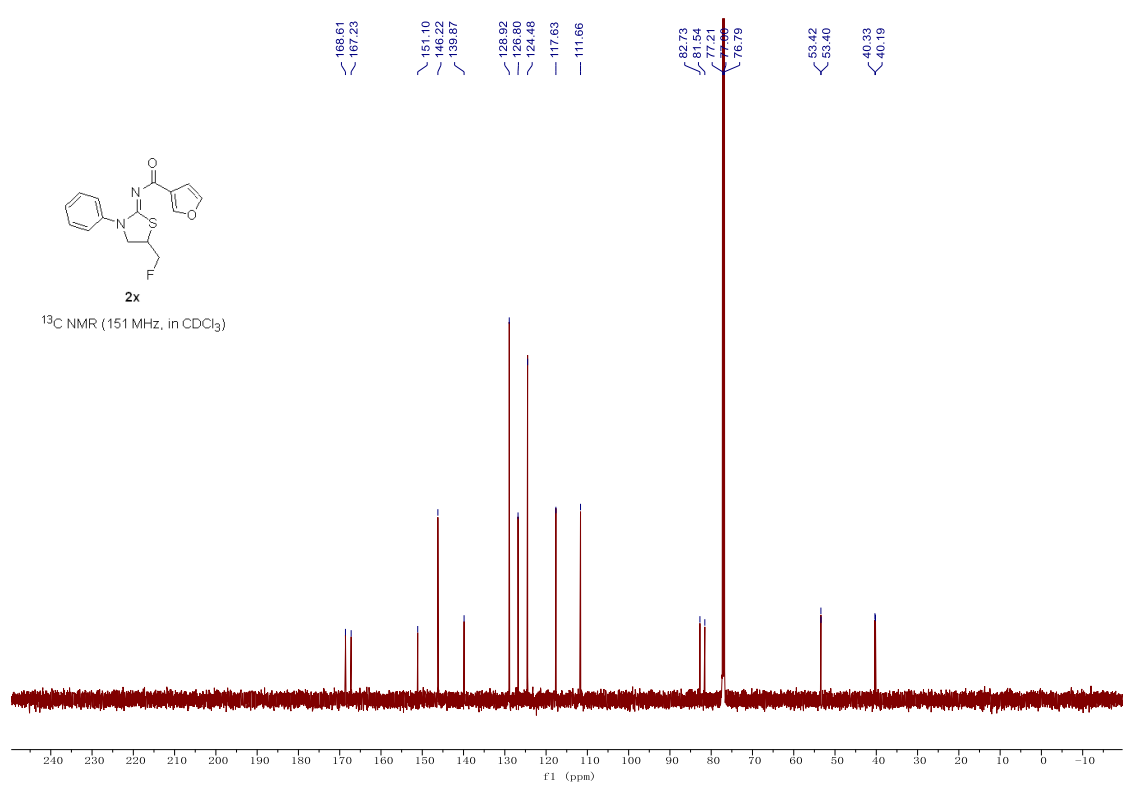

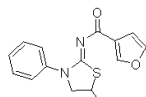

2x

<sup>19</sup>F NMR (565 MHz, in CDCl<sub>3</sub>)

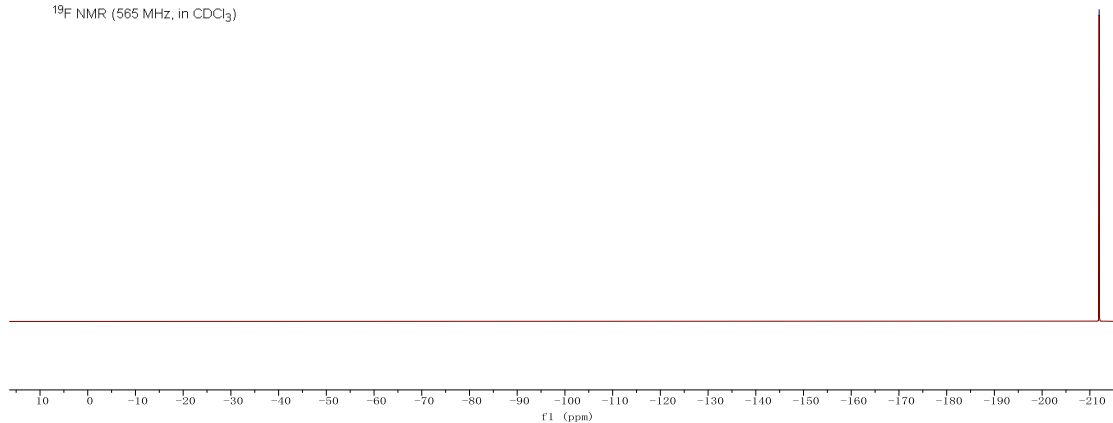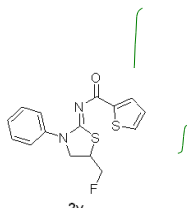

2y

<sup>1</sup>H NMR (500 MHz, in CDCl<sub>3</sub>)

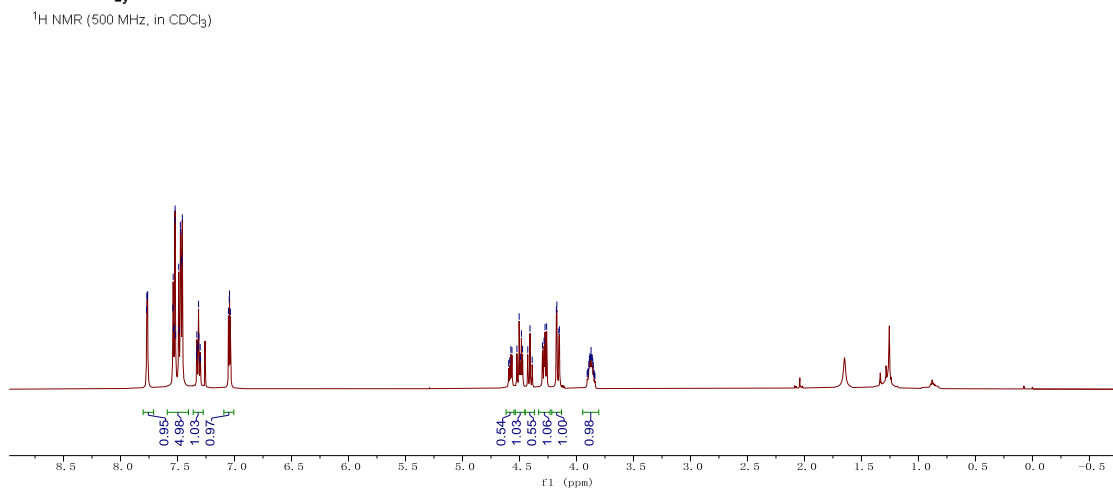

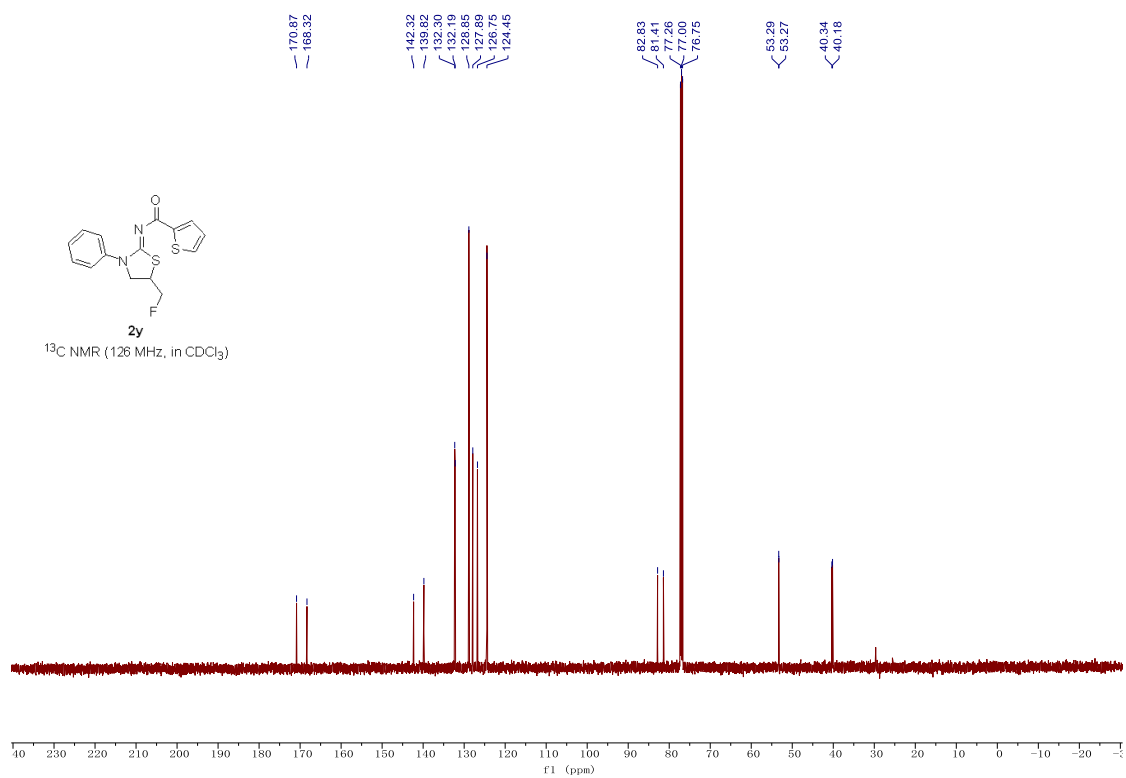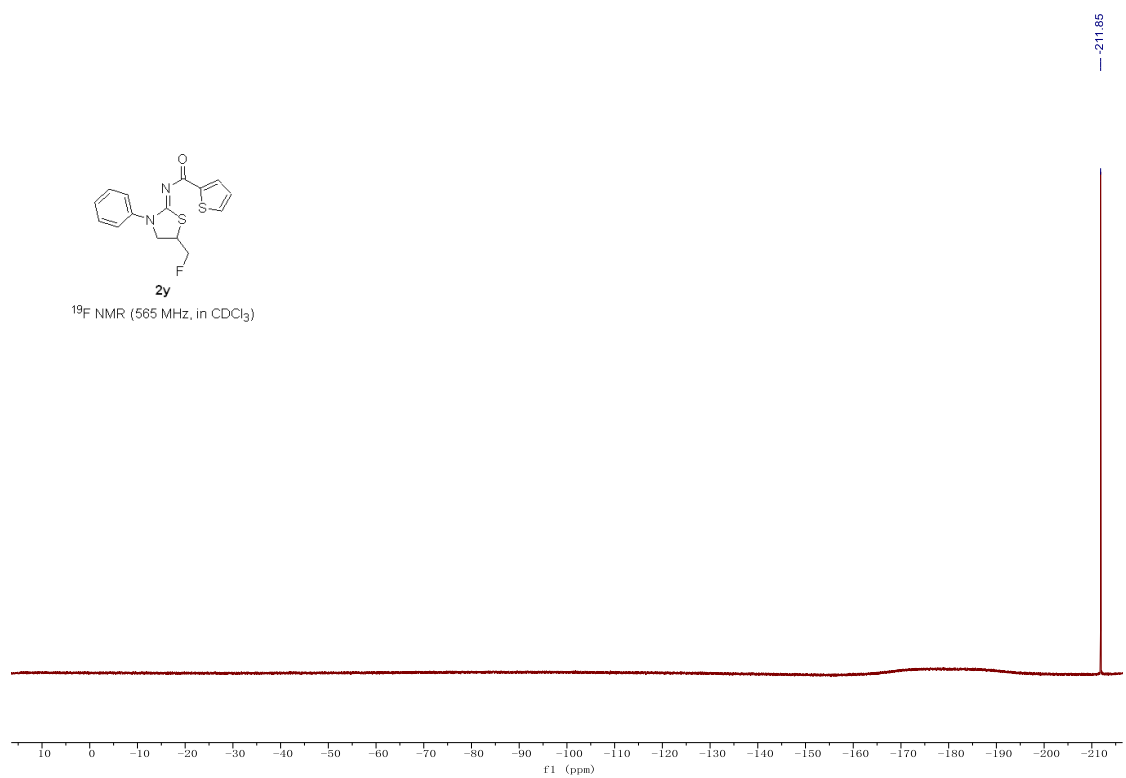

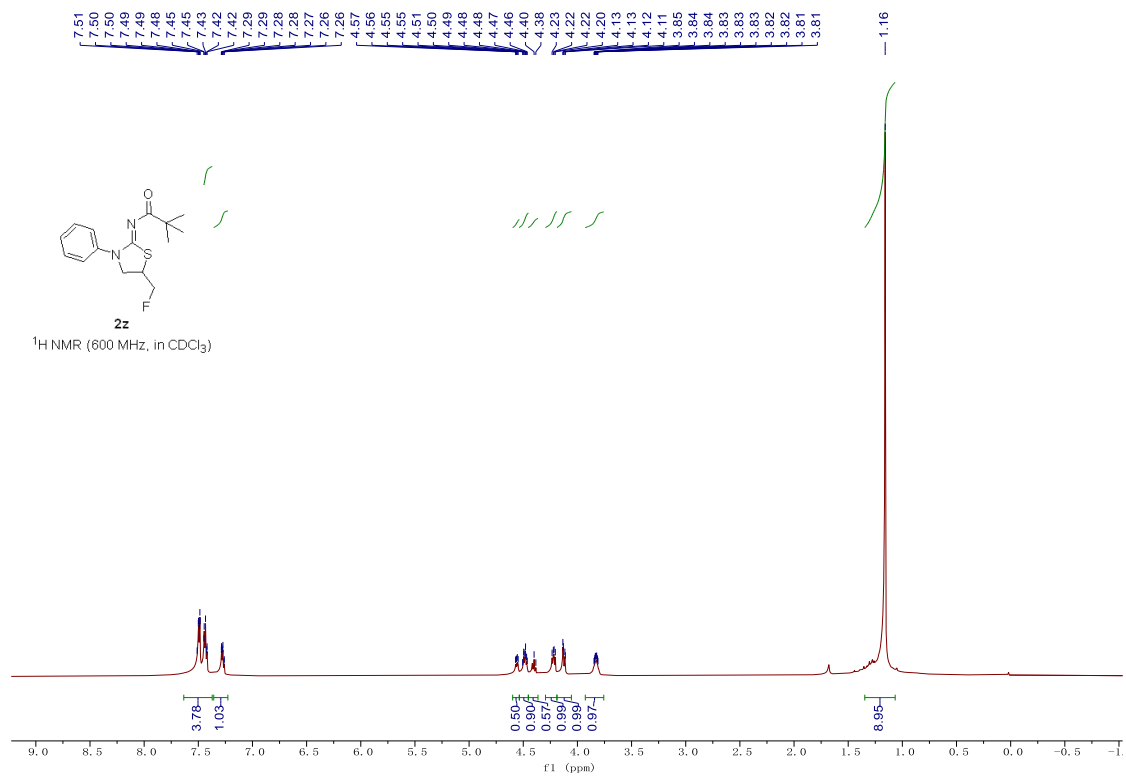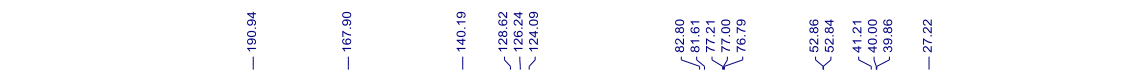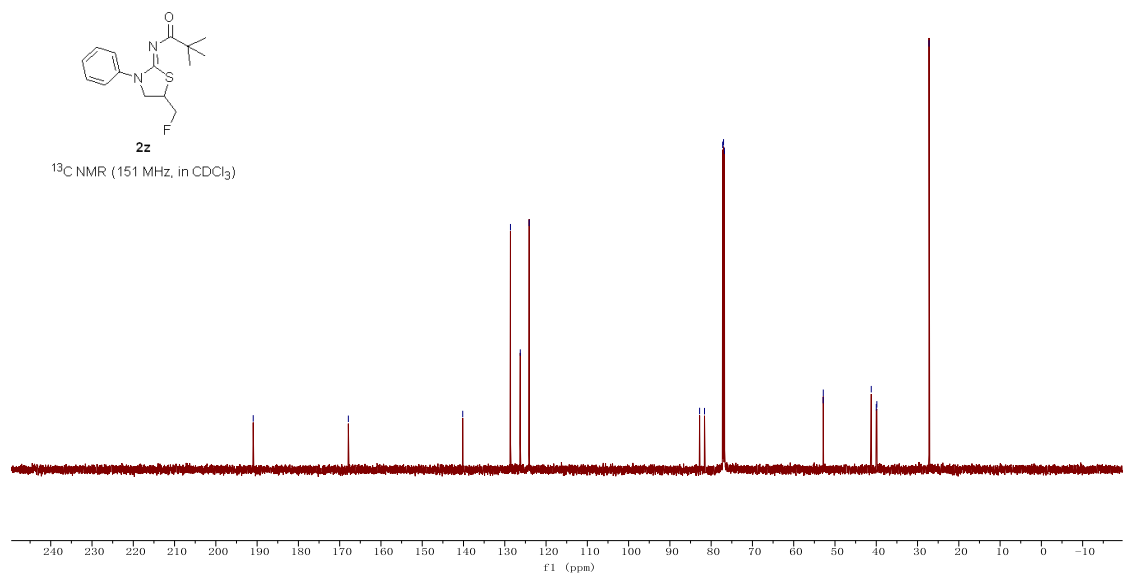



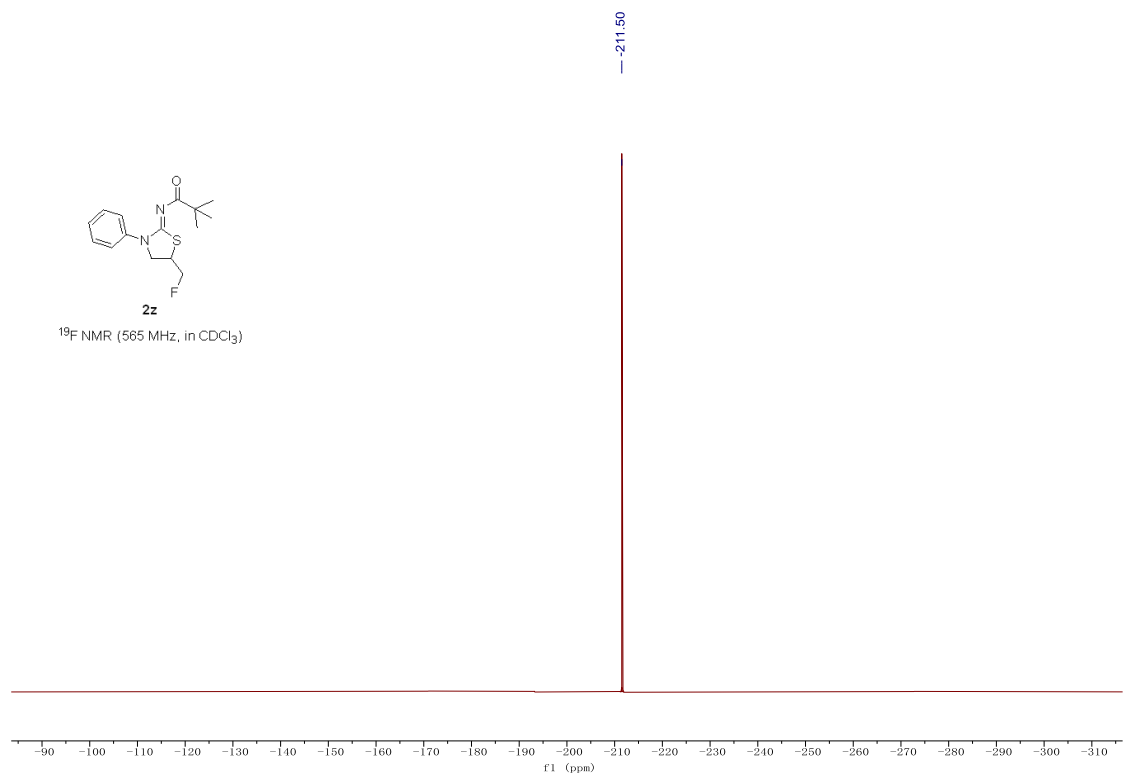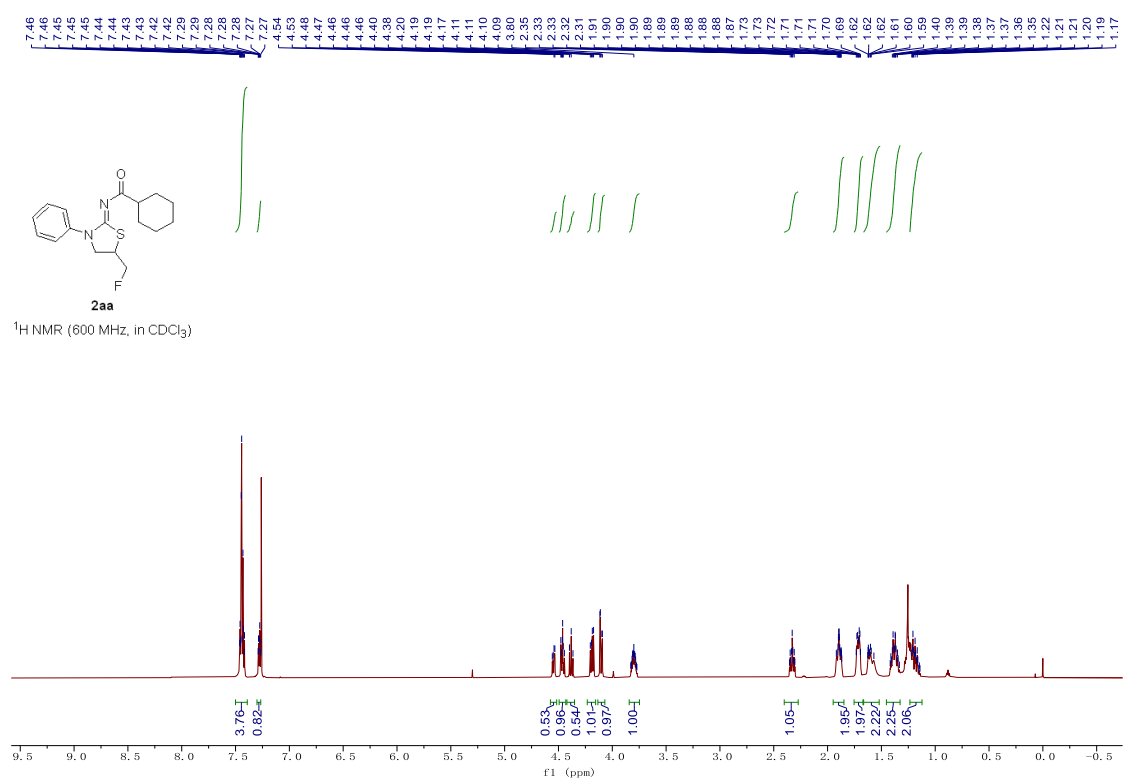

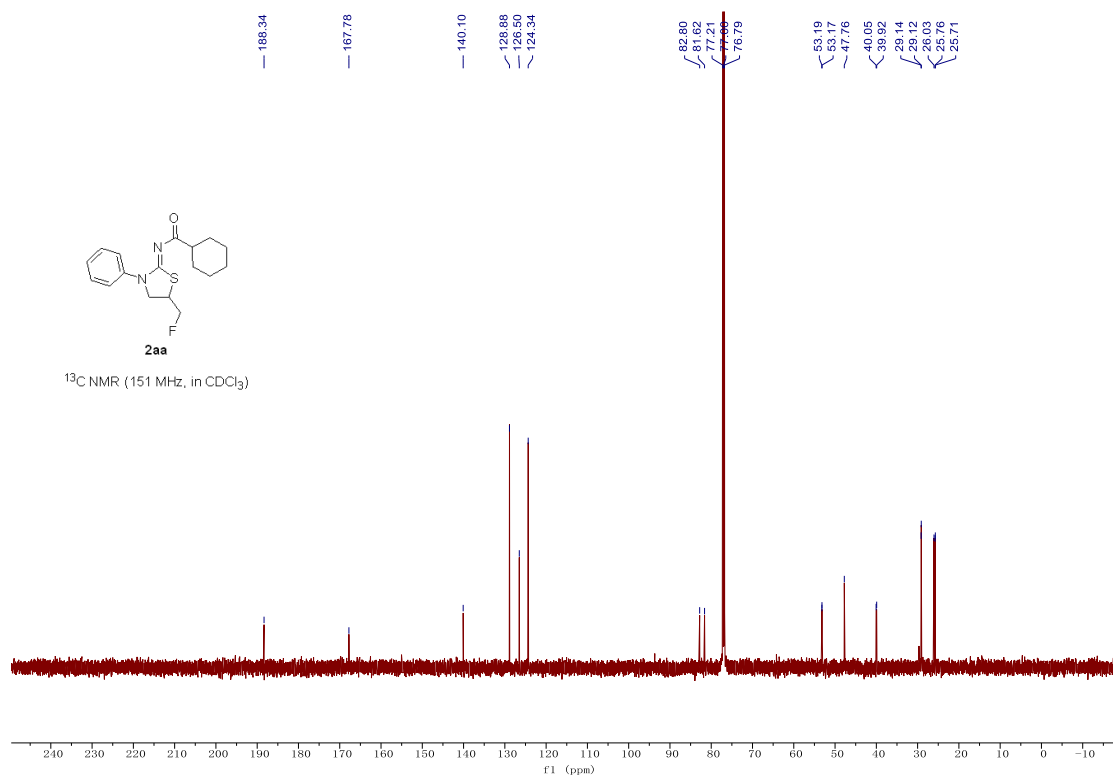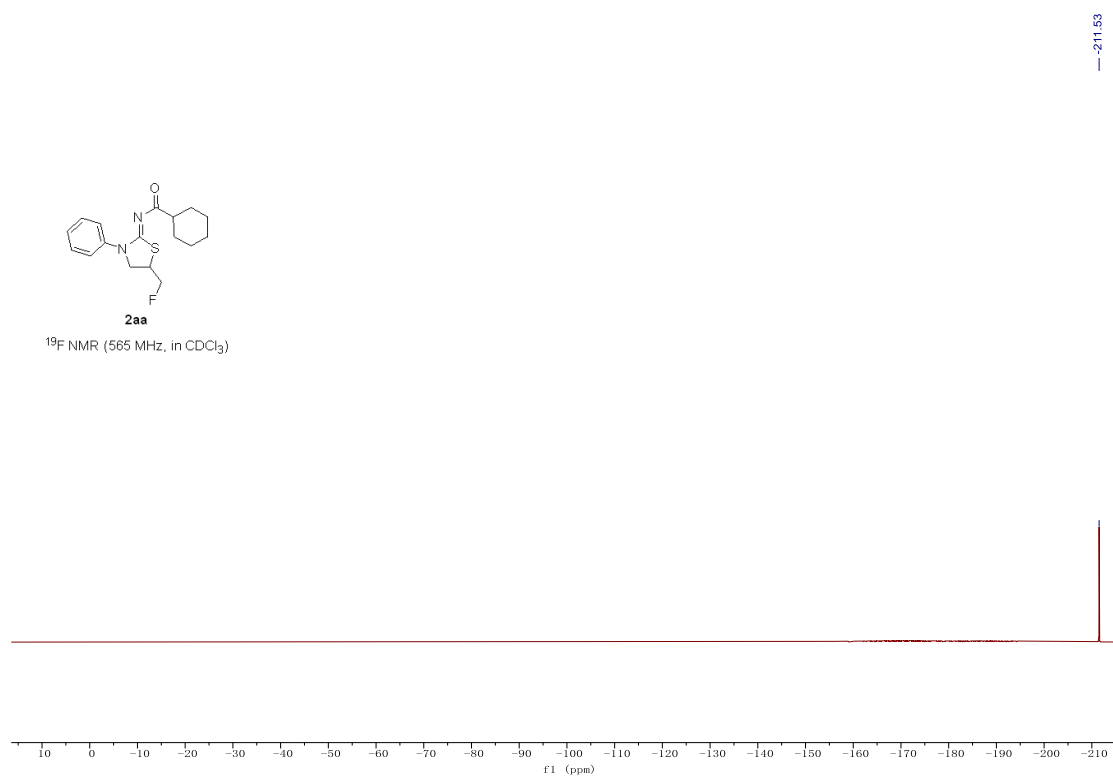

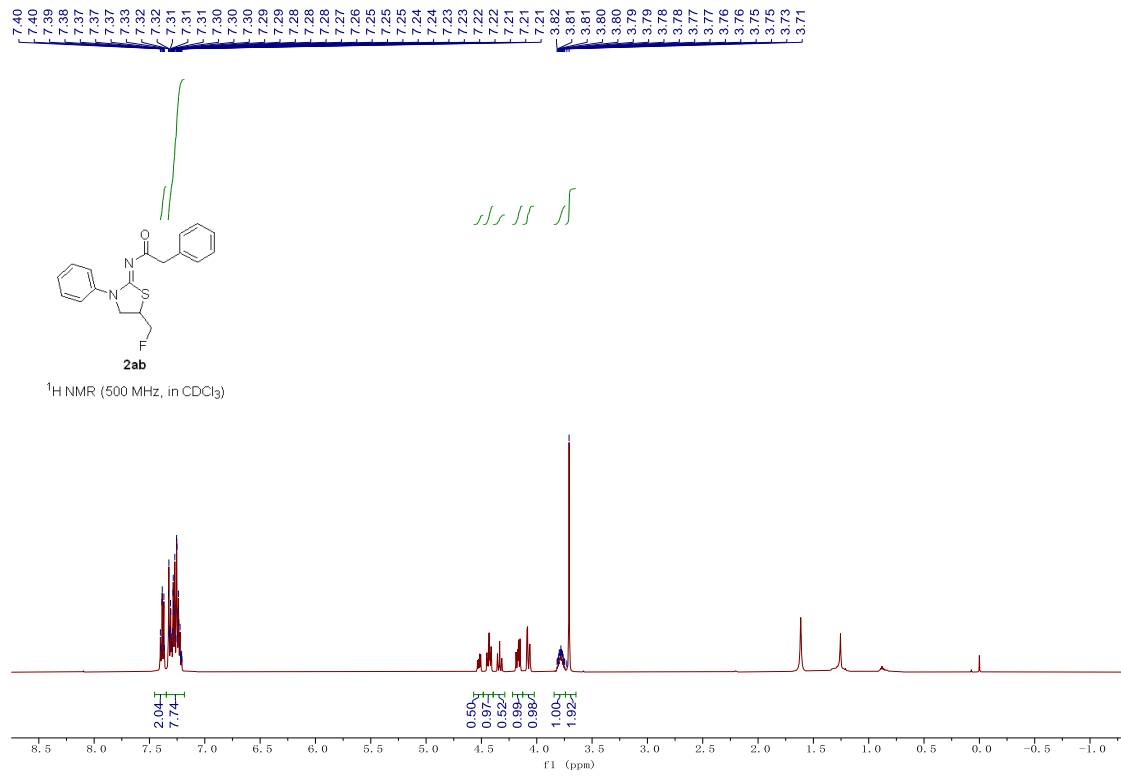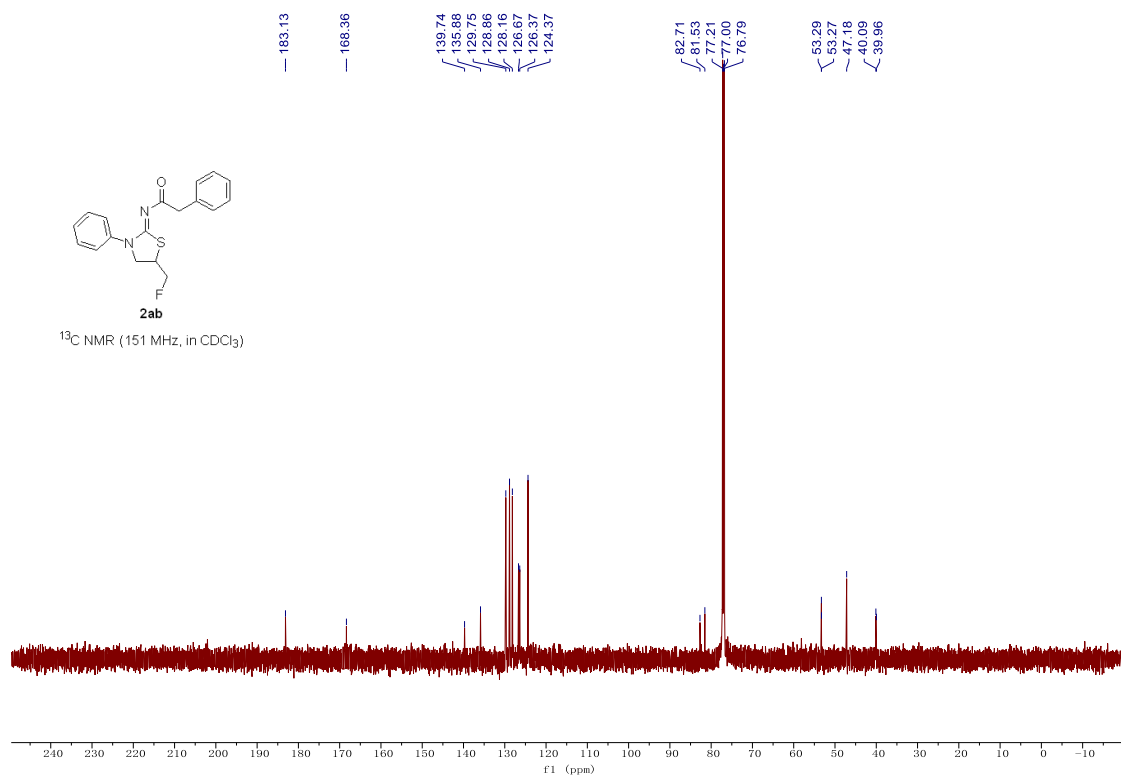

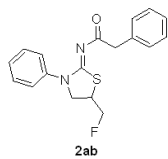

<sup>19</sup>F NMR (565 MHz, in CDCl<sub>3</sub>)

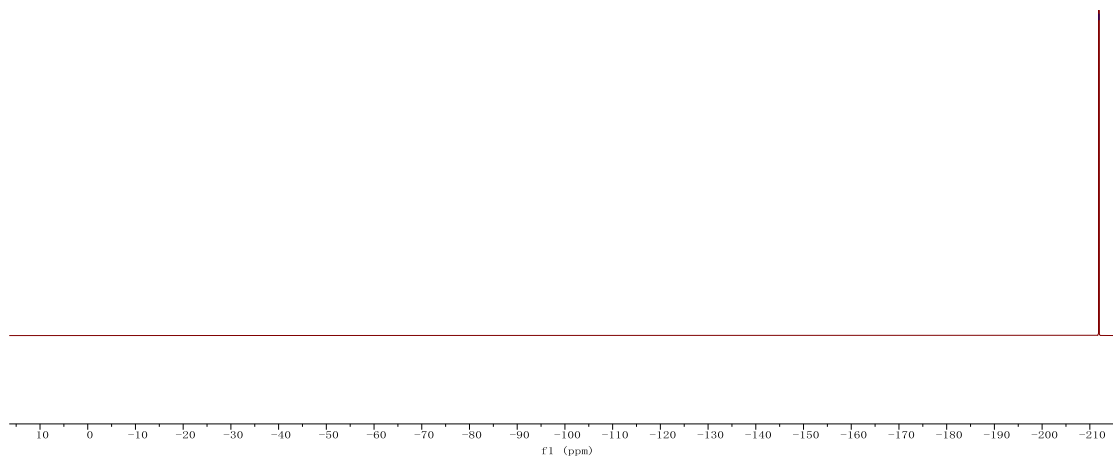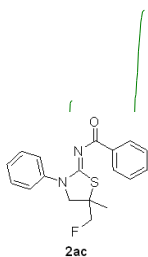

<sup>1</sup>H NMR (600 MHz, in CDCl<sub>3</sub>)

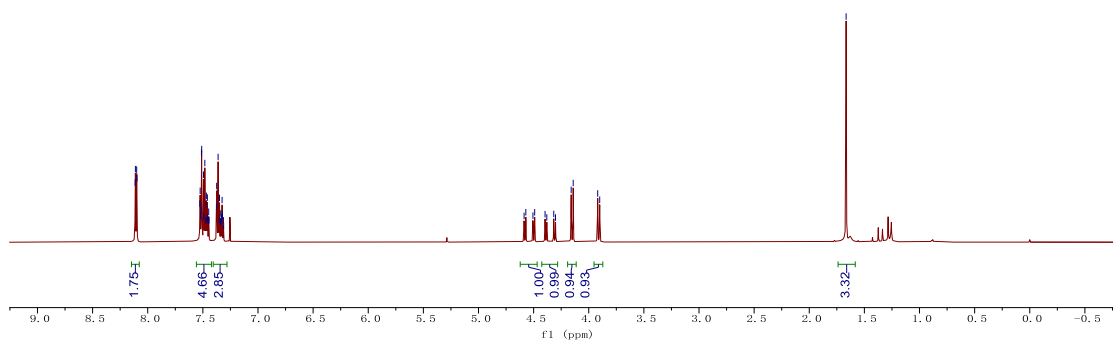

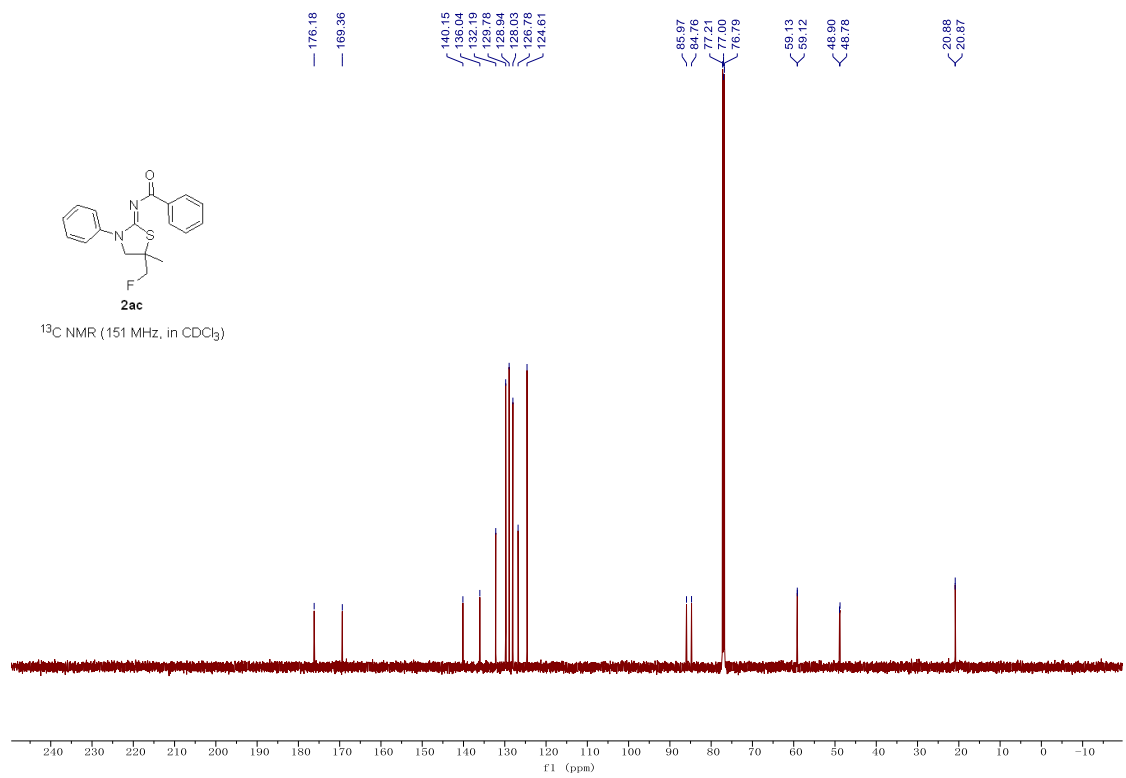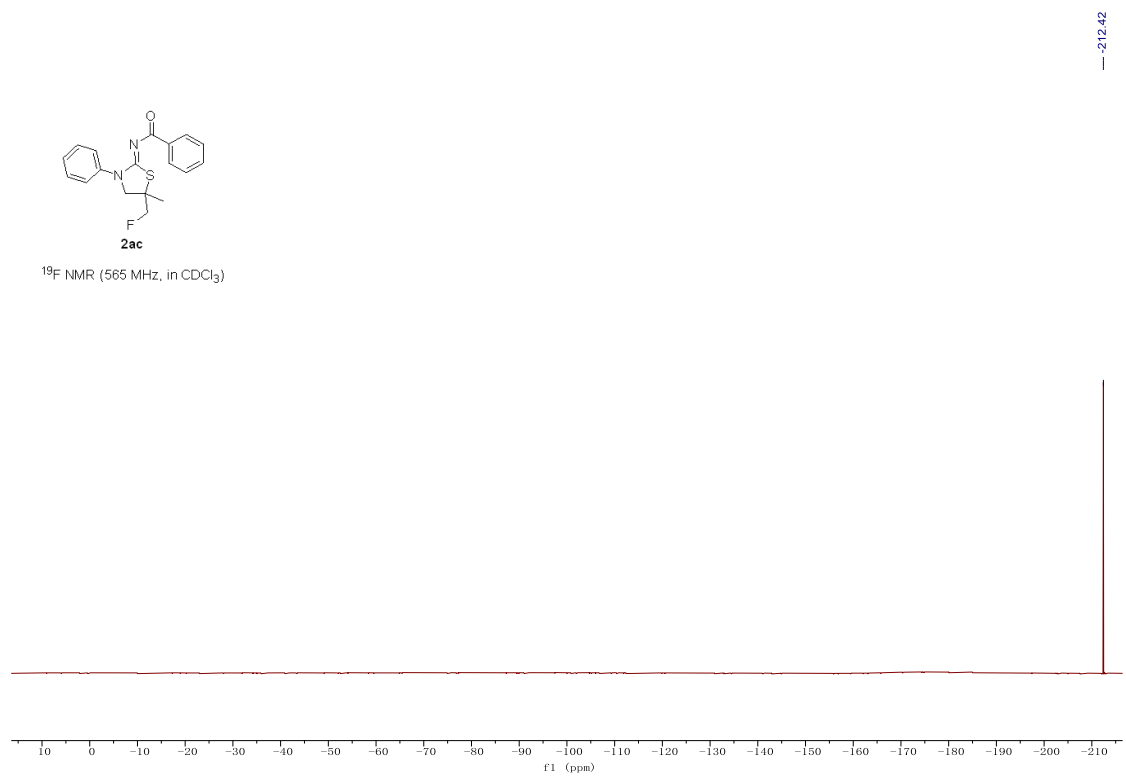

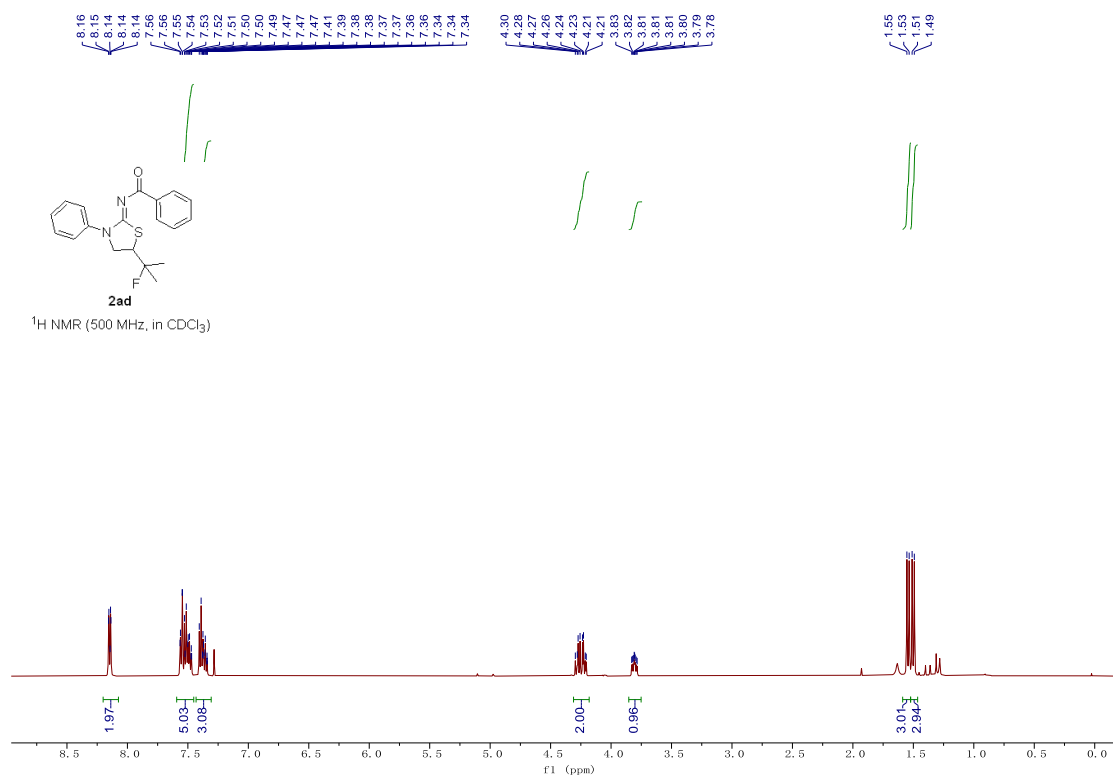

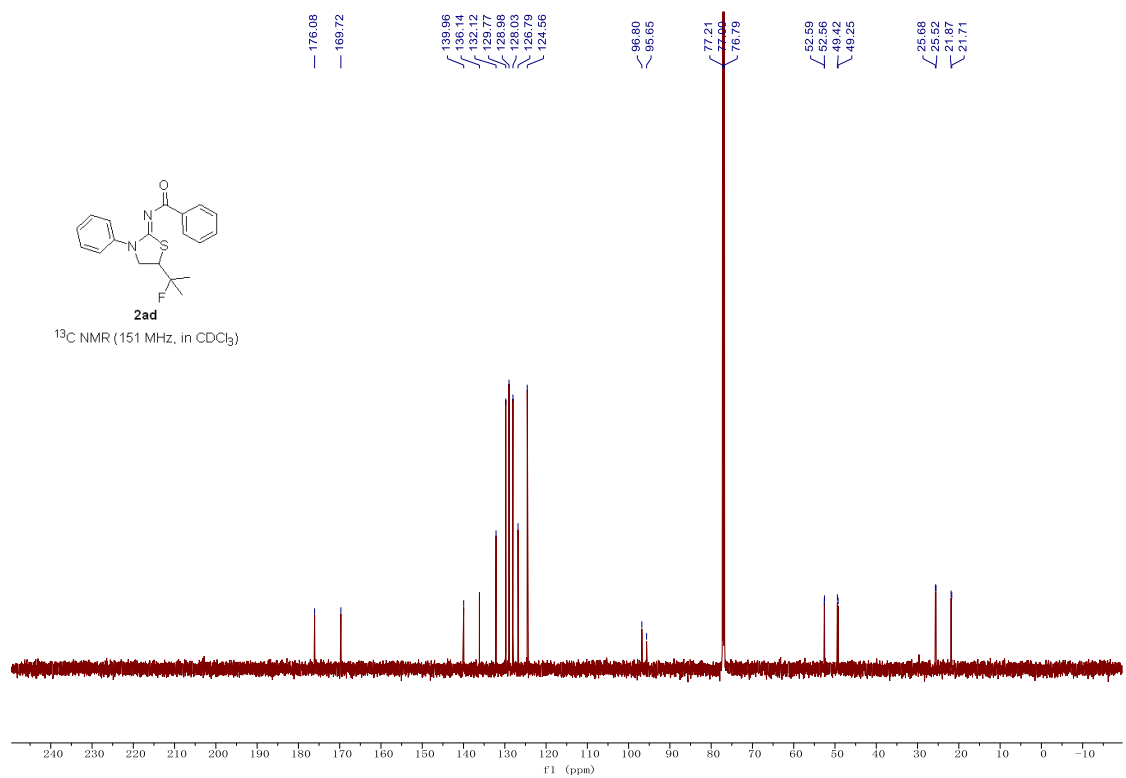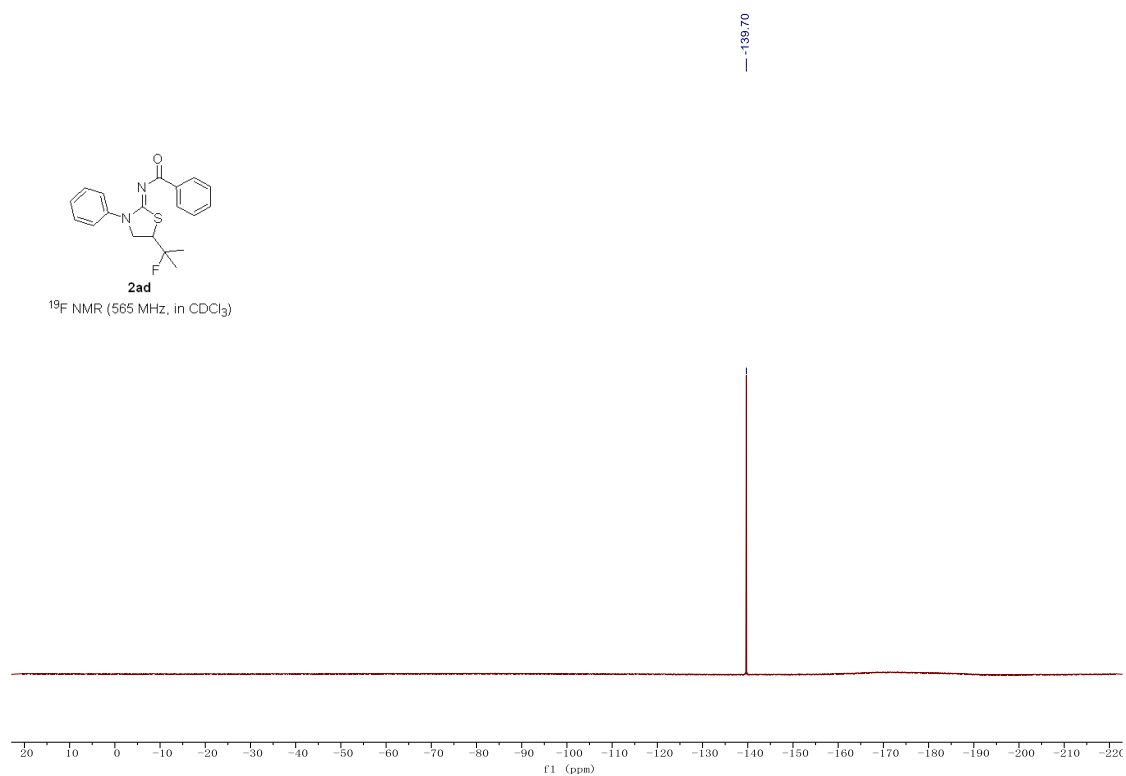

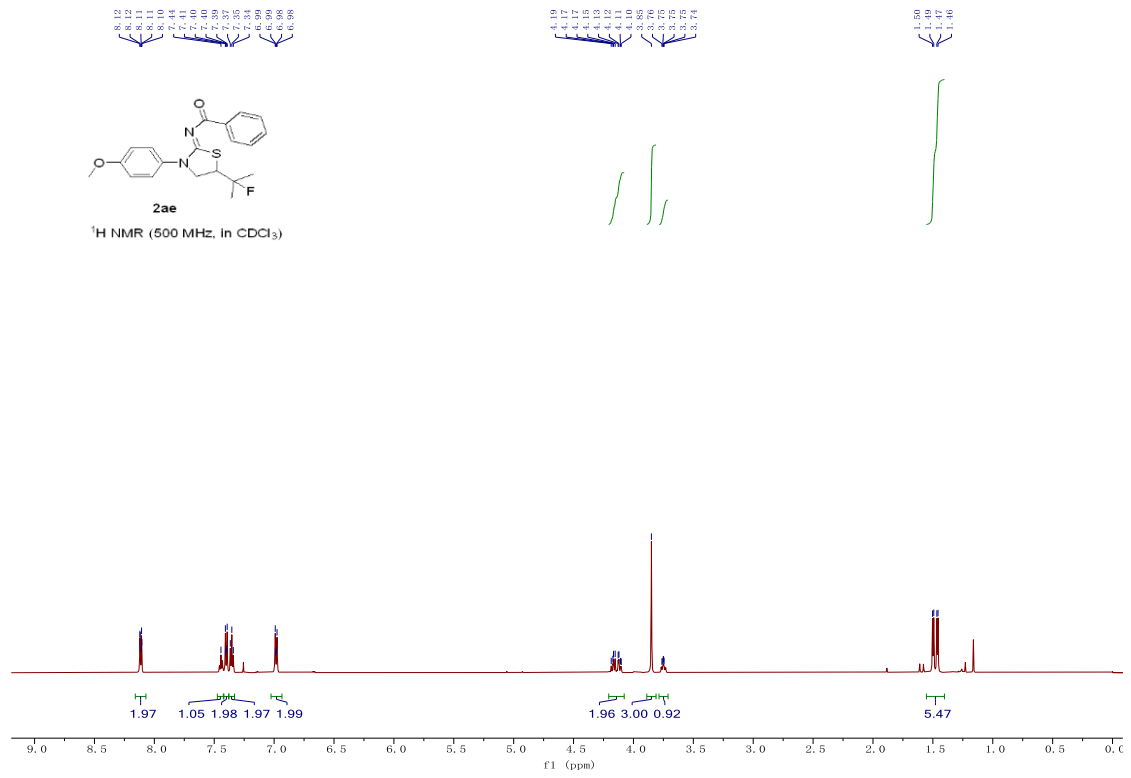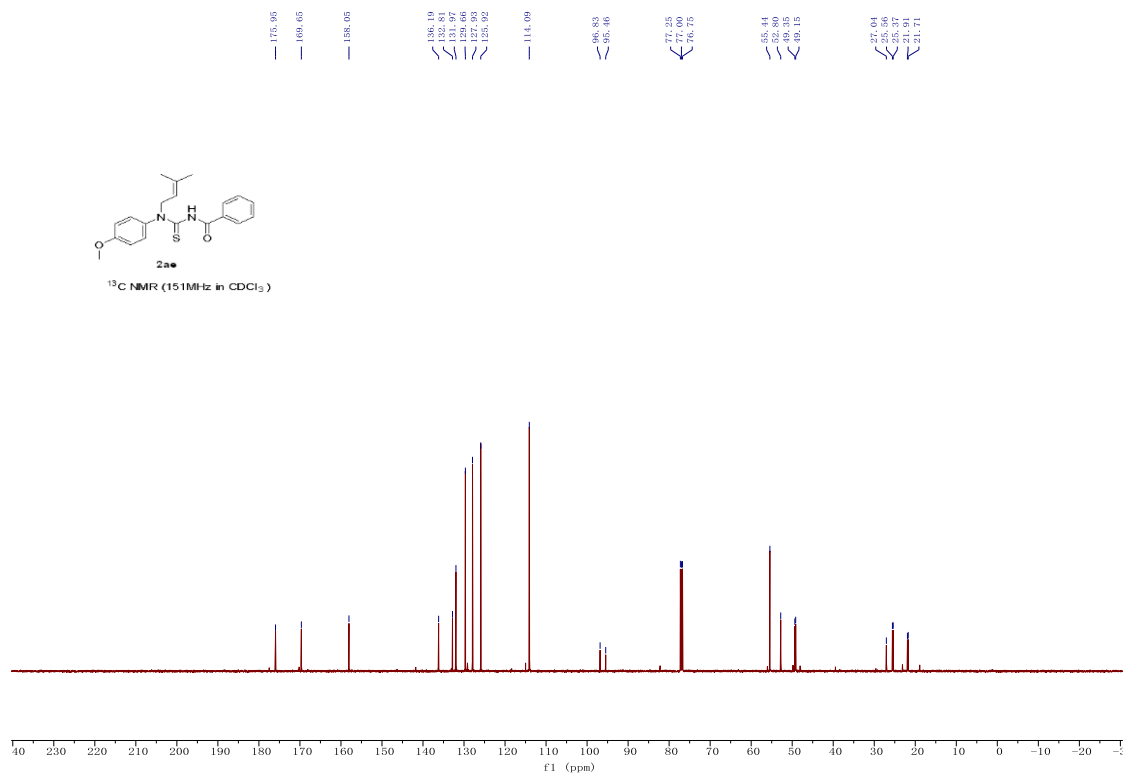



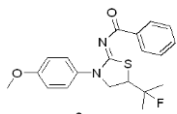

<sup>19</sup>F NMR (565 MHz, in CDCl<sub>3</sub>)

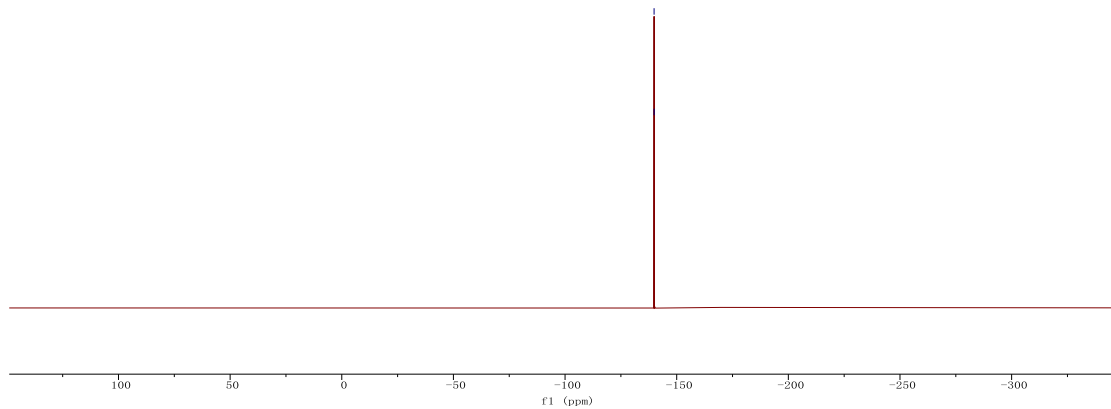

8.04  
8.02  
7.96  
7.948  
7.48  
7.46  
7.43  
7.42  
7.41  
7.37  
7.36  
7.35  
7.33  
7.31  
7.30  
4.93  
4.92  
4.91  
4.84  
4.83  
4.82  
4.81  
4.42  
4.41  
4.40  
3.87  
3.86  
3.85  
3.84  
3.82  
2.10  
2.09  
2.07  
2.06  
2.04  
2.01  
1.88  
1.88  
1.87  
1.86  
1.85  
1.84  
1.83  
1.83  
1.82  
1.81  
1.81  
1.80  
1.78  
1.78  
1.76  
1.75  
1.75  
1.74  
1.73  
1.72  
1.72  
1.70  
1.69  
1.69  
1.59  
1.59  
1.58  
1.58  
1.57  
1.57  
1.56  
1.55  
1.52  
1.51  
1.50  
1.48  
1.48  
1.48

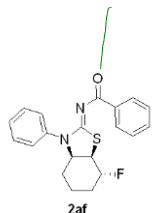

<sup>1</sup>H NMR (500 MHz, in CDCl<sub>3</sub>)

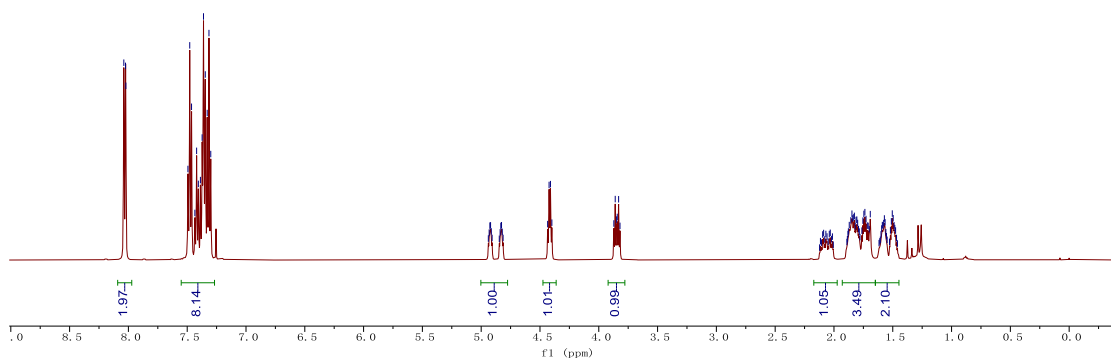

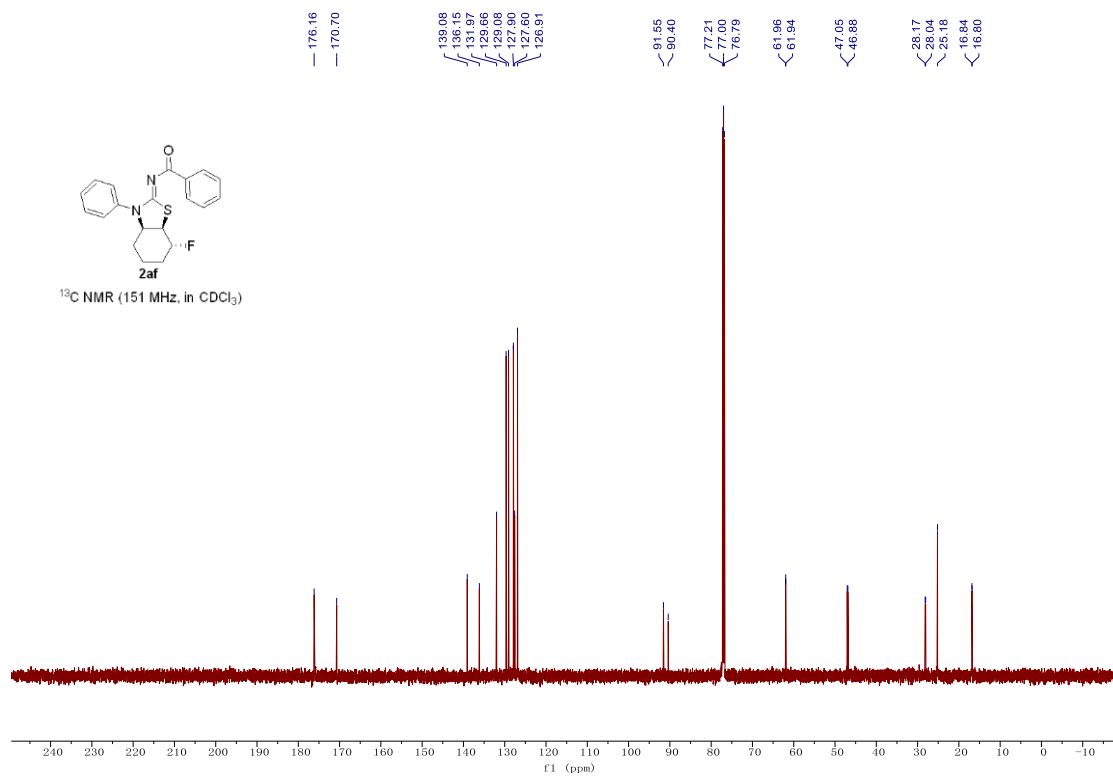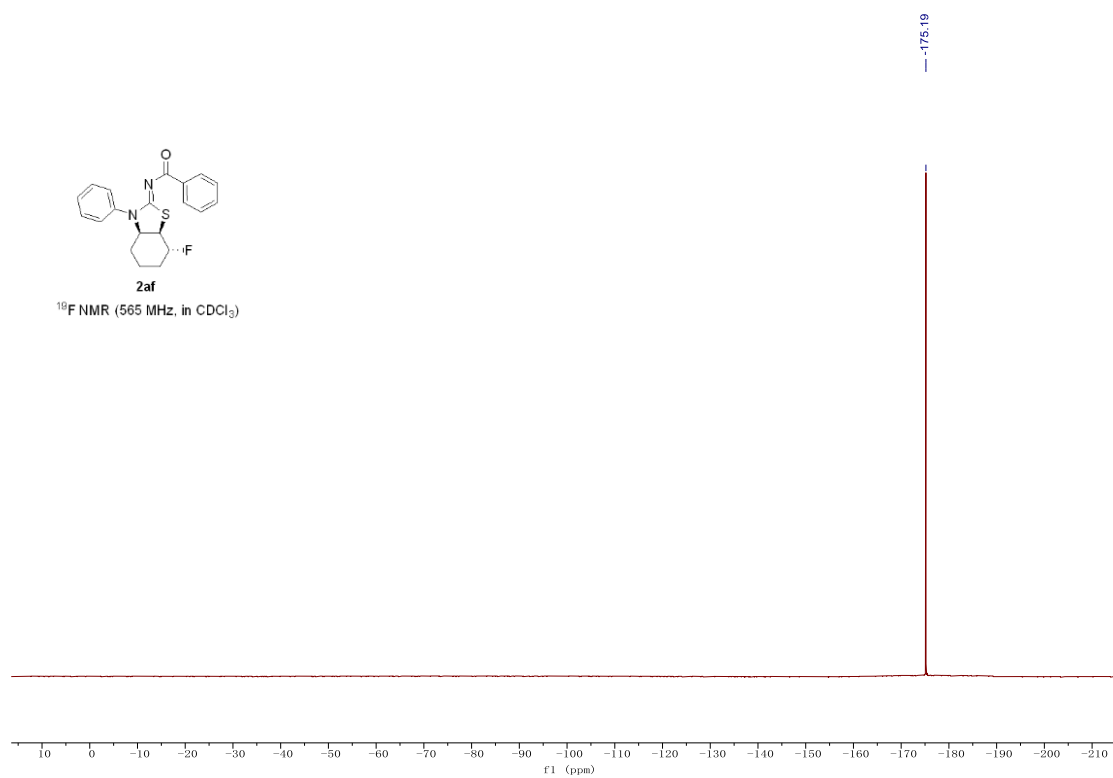

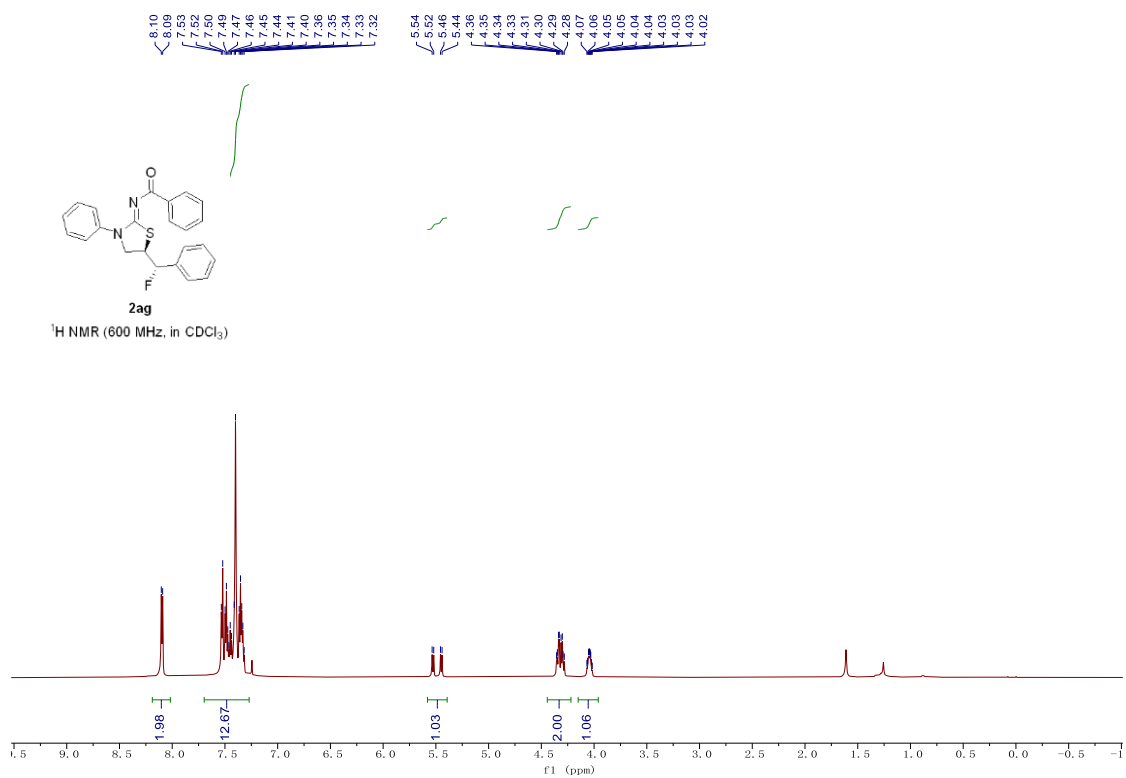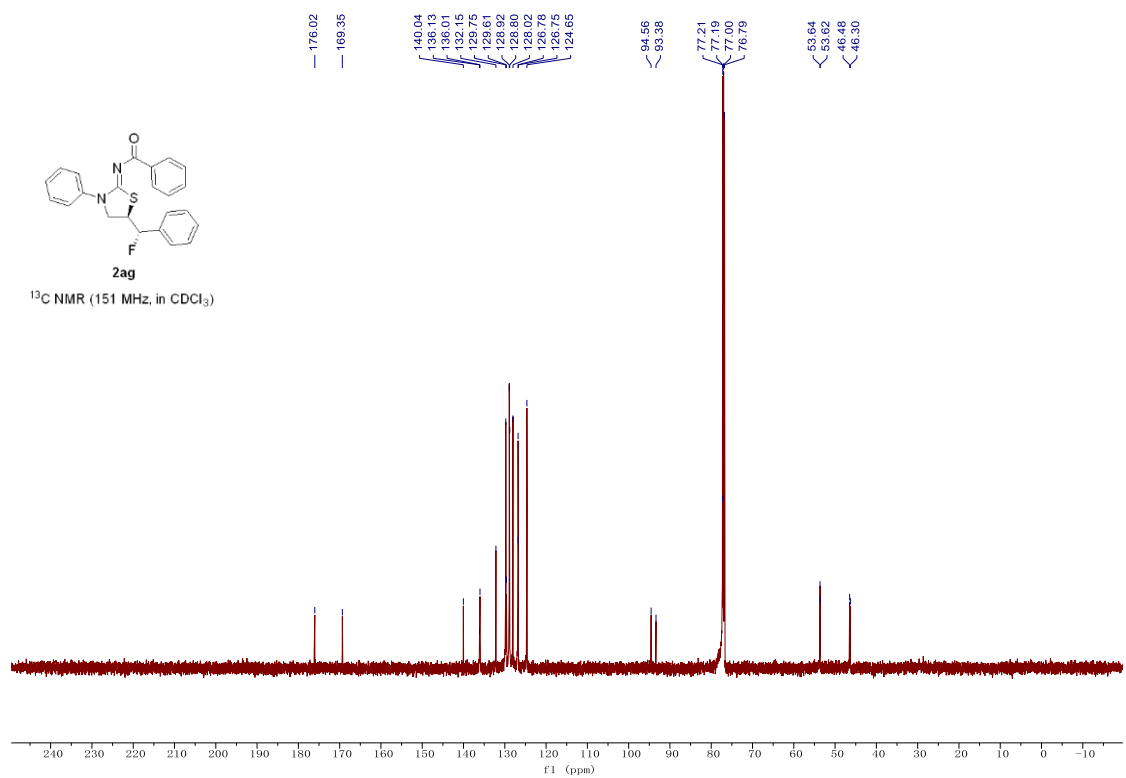

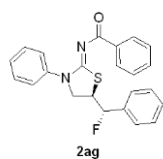

<sup>19</sup>F NMR (565 MHz, in CDCl<sub>3</sub>)

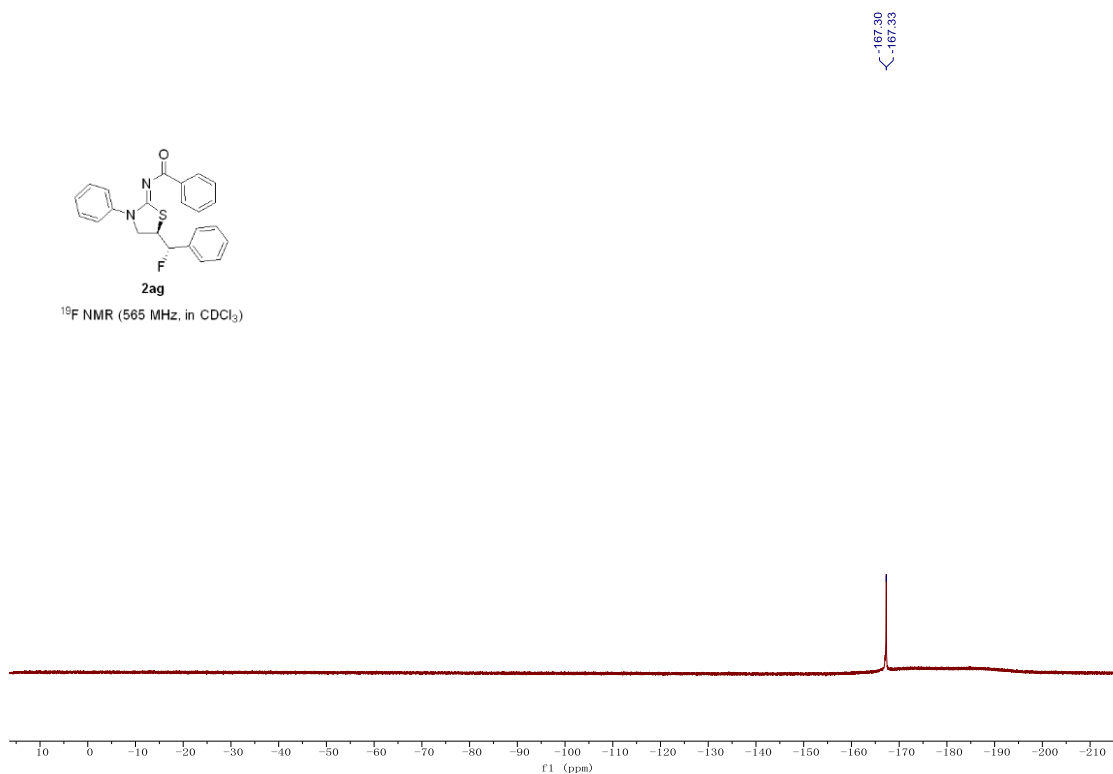

7.99  
7.98  
7.98  
7.98  
7.42  
7.41  
7.40  
7.38  
7.38  
7.38  
7.38  
7.37  
7.37  
7.37  
7.34  
7.34  
7.33  
7.33  
7.30  
7.29  
7.28  
7.28  
7.27  
7.26  
7.25  
7.25  
7.24  
7.24  
7.23  
7.23  
4.43  
4.42  
4.41  
4.40  
4.40  
4.40  
3.28  
1.73  
1.72  
1.72  
1.71  
1.71  
1.65  
1.65  
1.54  
1.54  
1.53  
1.53  
1.25  
1.24  
1.24  
1.23  
1.23  
1.21  
1.21  
1.20  
1.20  
1.19  
1.19  
1.18  
1.18  
1.18  
0.86  
0.86  
0.89  
0.89  
0.87  
0.77  
0.76  
0.75  
0.71  
0.70  
0.68

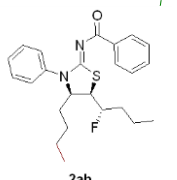

<sup>1</sup>H NMR (600 MHz, in CDCl<sub>3</sub>)

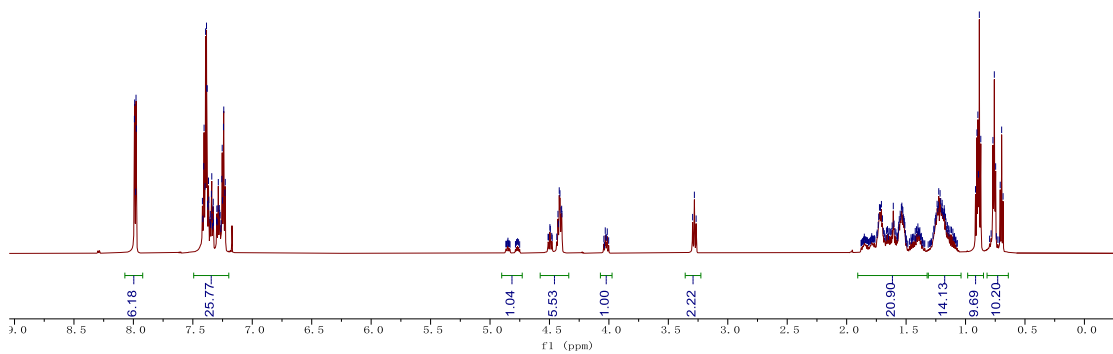

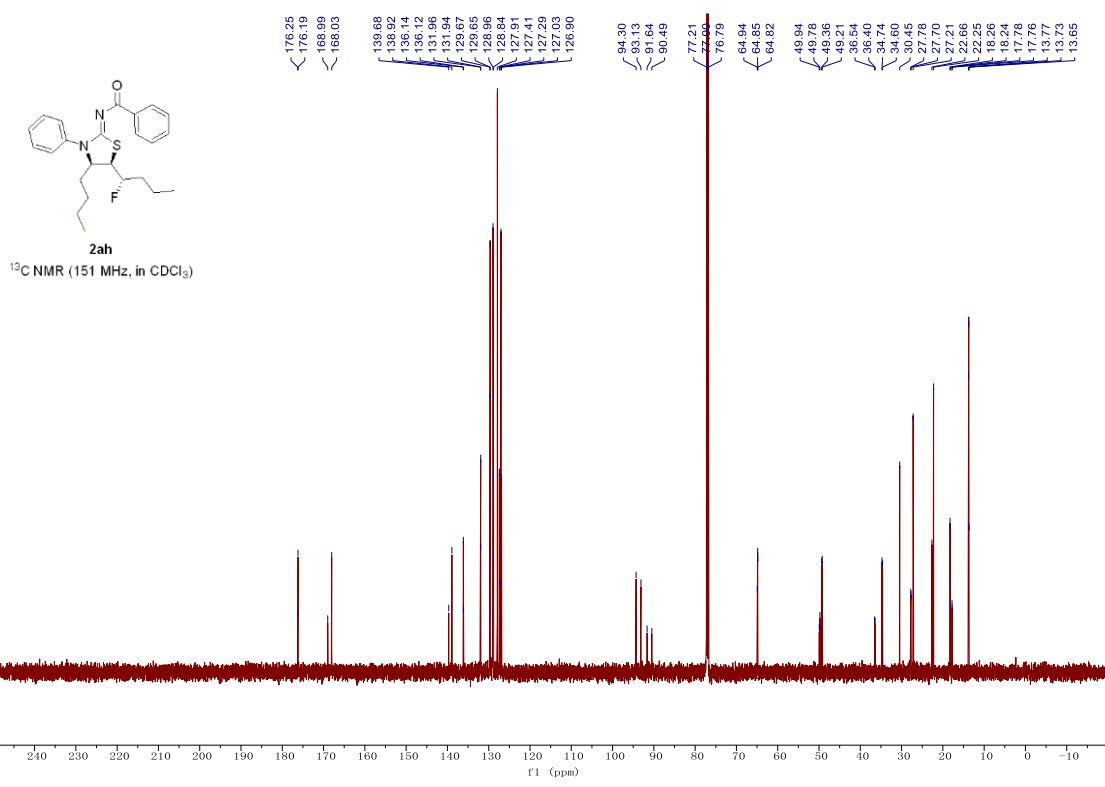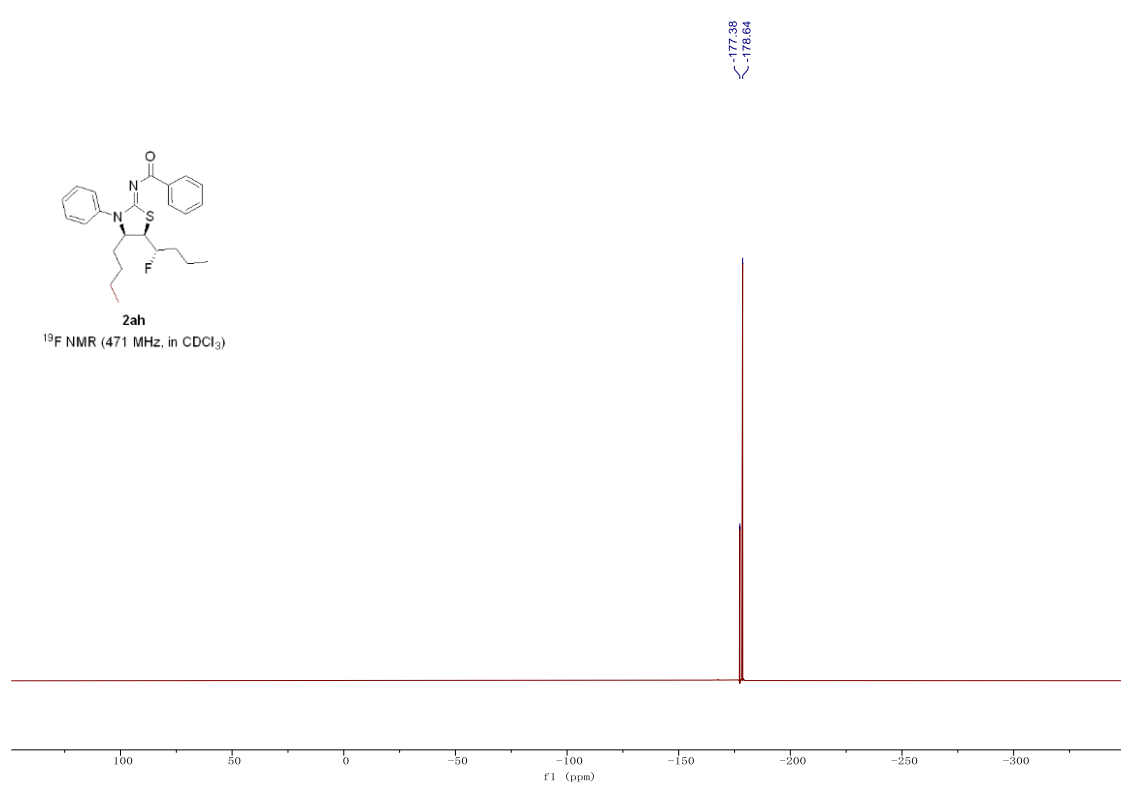

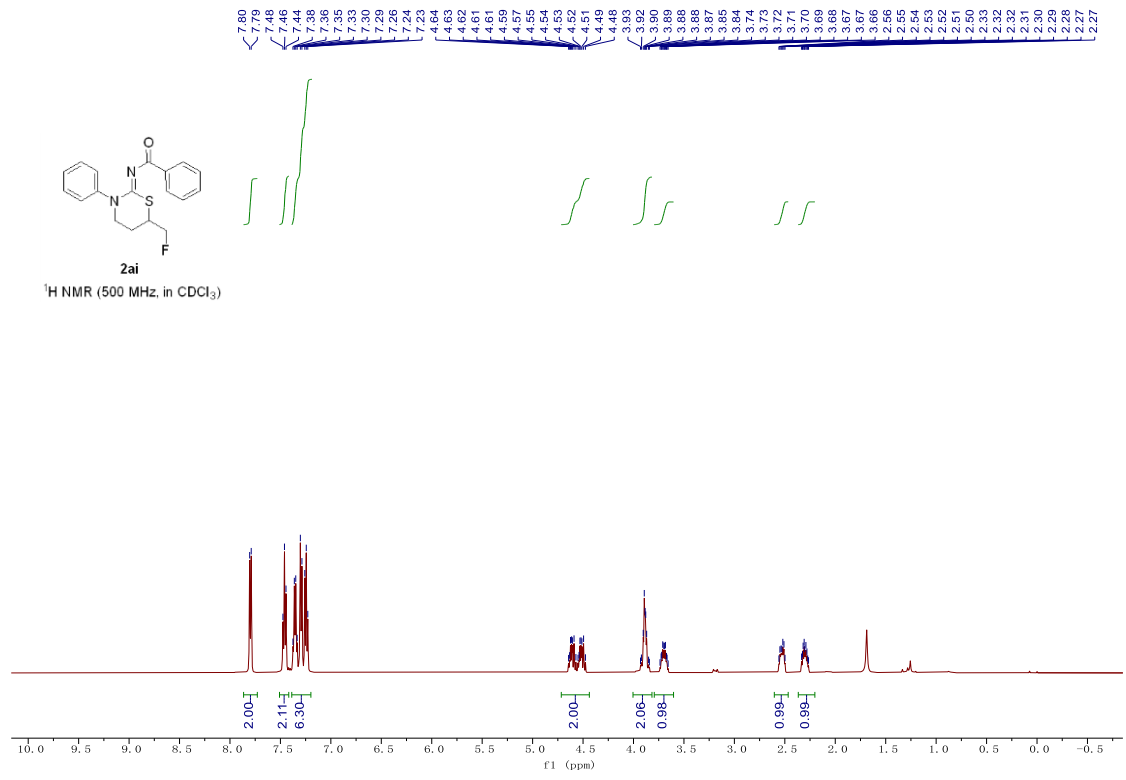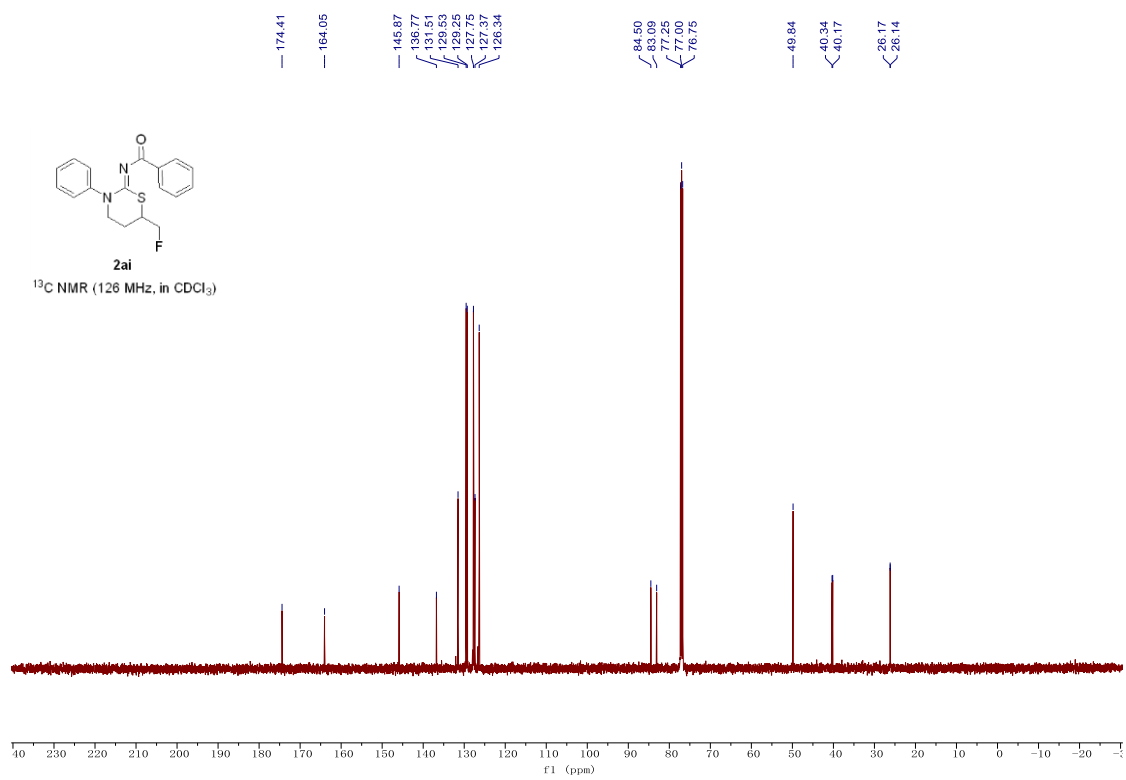

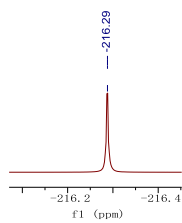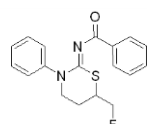

2ai

19F NMR (565 MHz, in CDCl<sub>3</sub>)

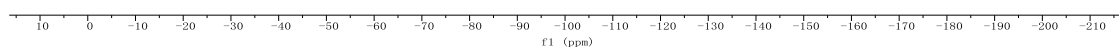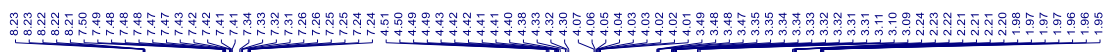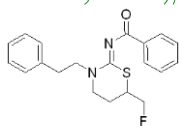

2aj

1H NMR (600 MHz, in CDCl<sub>3</sub>)

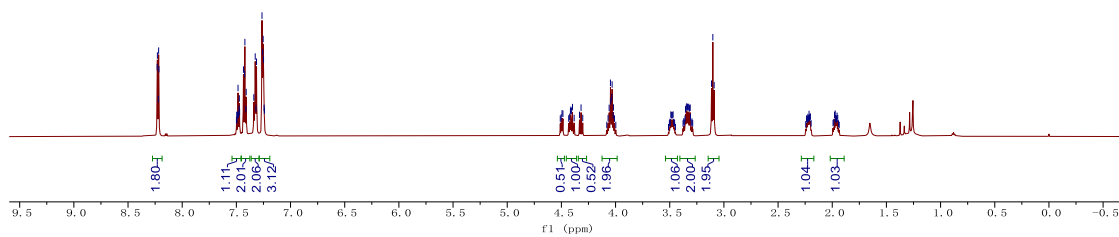

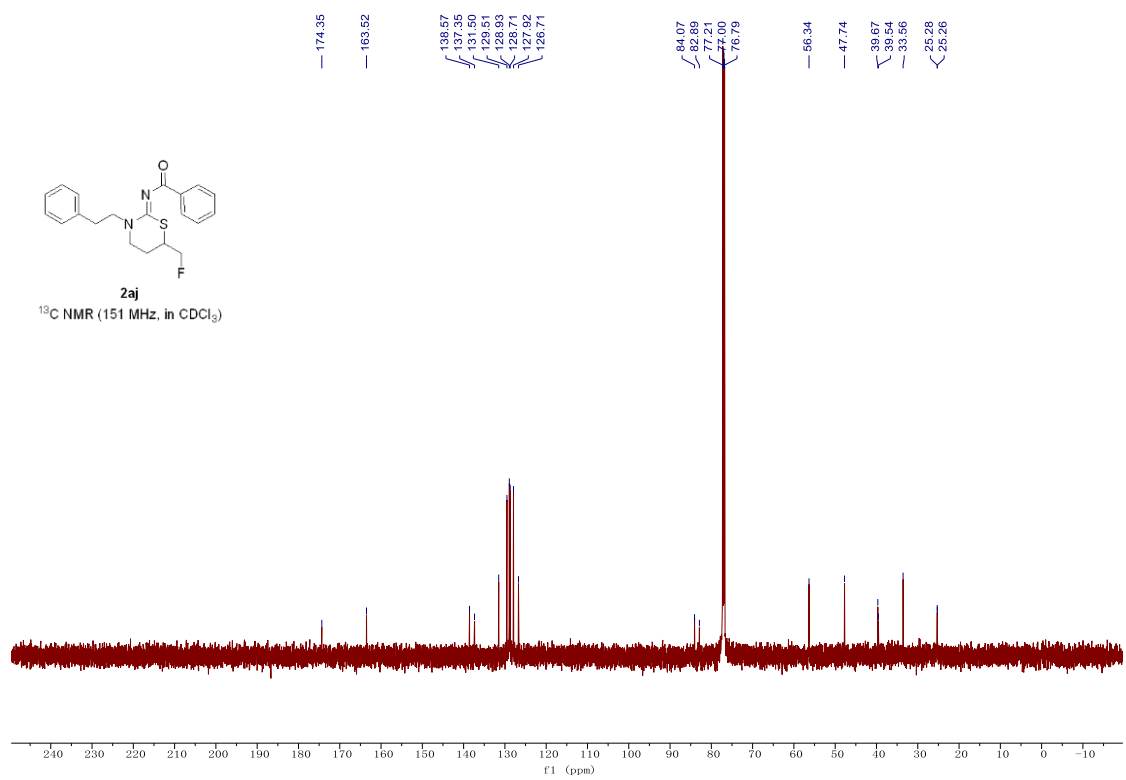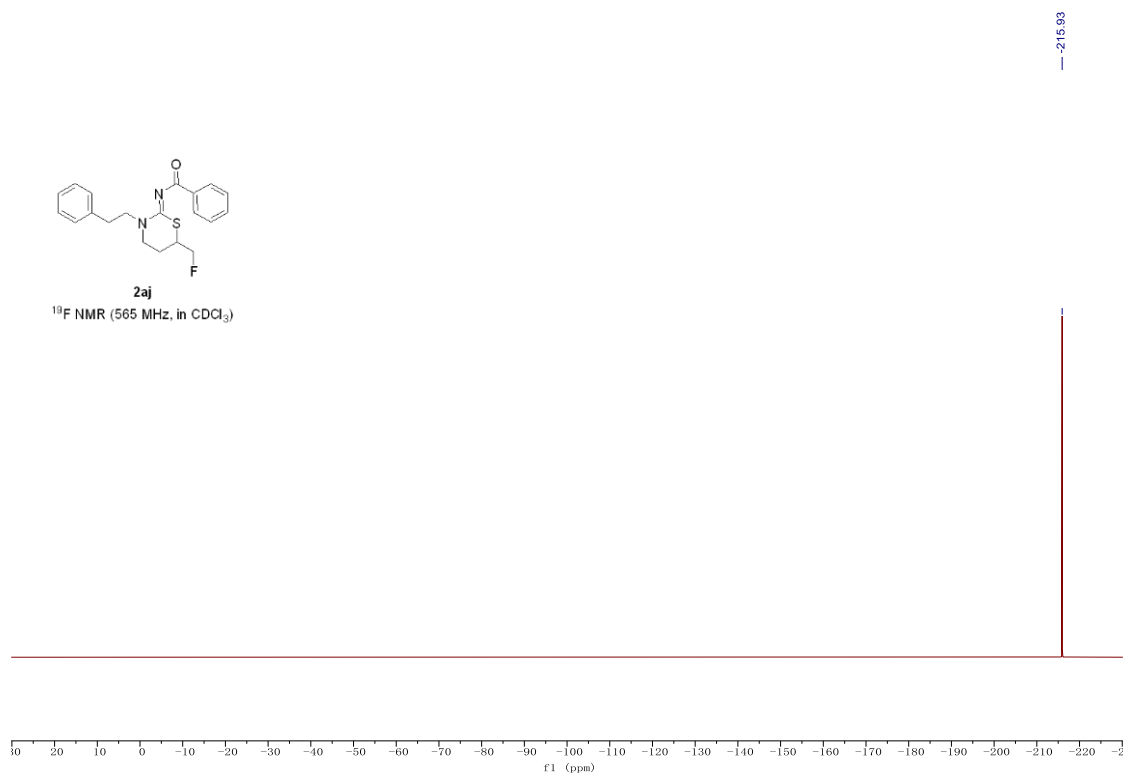



8.09  
8.09  
8.08  
8.07  
8.07  
8.07  
7.40  
7.39  
7.39  
7.38  
7.38  
7.34  
7.34  
7.33  
7.33  
7.32  
7.31  
7.31  
4.46  
4.45  
4.44  
4.41  
4.40  
4.40  
4.39  
4.38  
4.38  
4.37  
4.36  
4.33  
4.32  
4.32  
4.09  
4.09  
4.07  
4.07  
4.06  
4.05  
4.02  
4.02  
4.00  
3.99  
3.99  
3.97  
3.97  
3.95  
3.65  
3.64  
3.64  
3.63  
3.59  
3.58  
3.57  
3.57  
3.48  
3.47  
3.46  
3.46  
2.86  
2.79  
2.78  
2.77  
2.77  
2.28  
2.28  
2.05  
2.05  
2.04  
2.03  
1.20  
1.19  
1.17

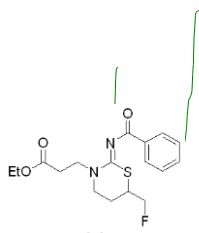

2ak

<sup>1</sup>H NMR (600 MHz, in CDCl<sub>3</sub>)

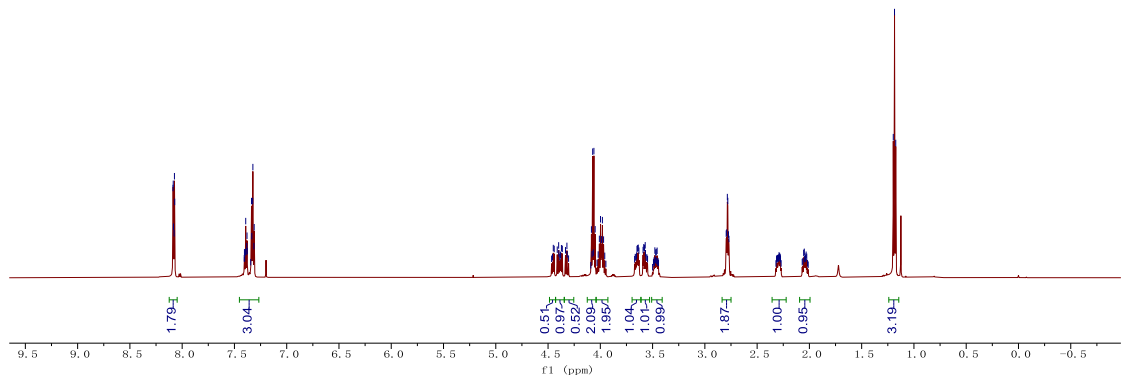

174.21

171.85

163.78

137.05

129.41

127.88

84.16

82.98

77.00

76.79

60.80

50.25

47.96

38.97

38.73

32.53

25.62

25.60

14.08

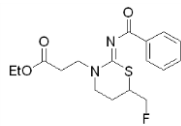

2ak

<sup>13</sup>C NMR (151 MHz, in CDCl<sub>3</sub>)

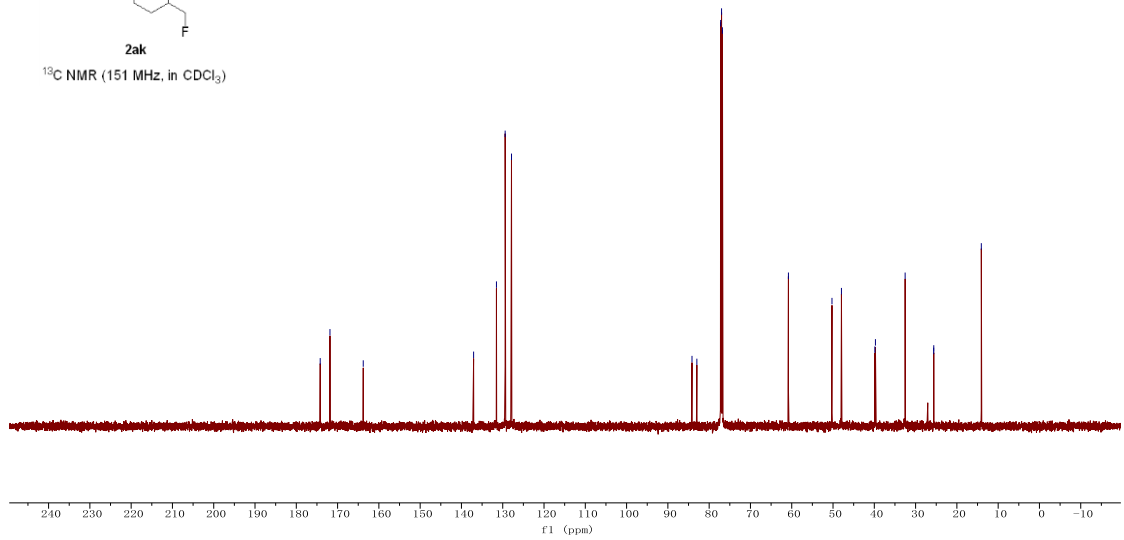

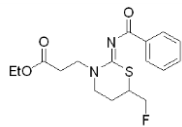

<sup>19</sup>F NMR (565 MHz, in CDCl<sub>3</sub>)

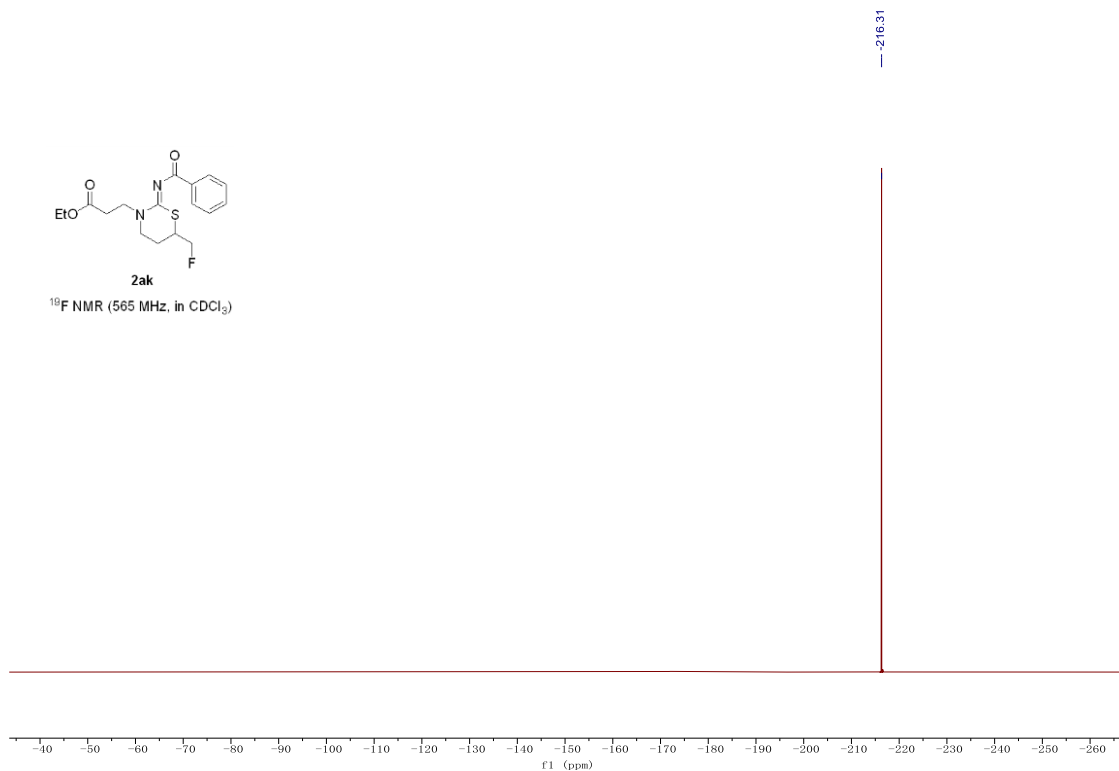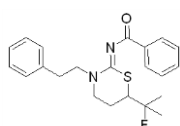

<sup>1</sup>H NMR (600 MHz, in CDCl<sub>3</sub>)

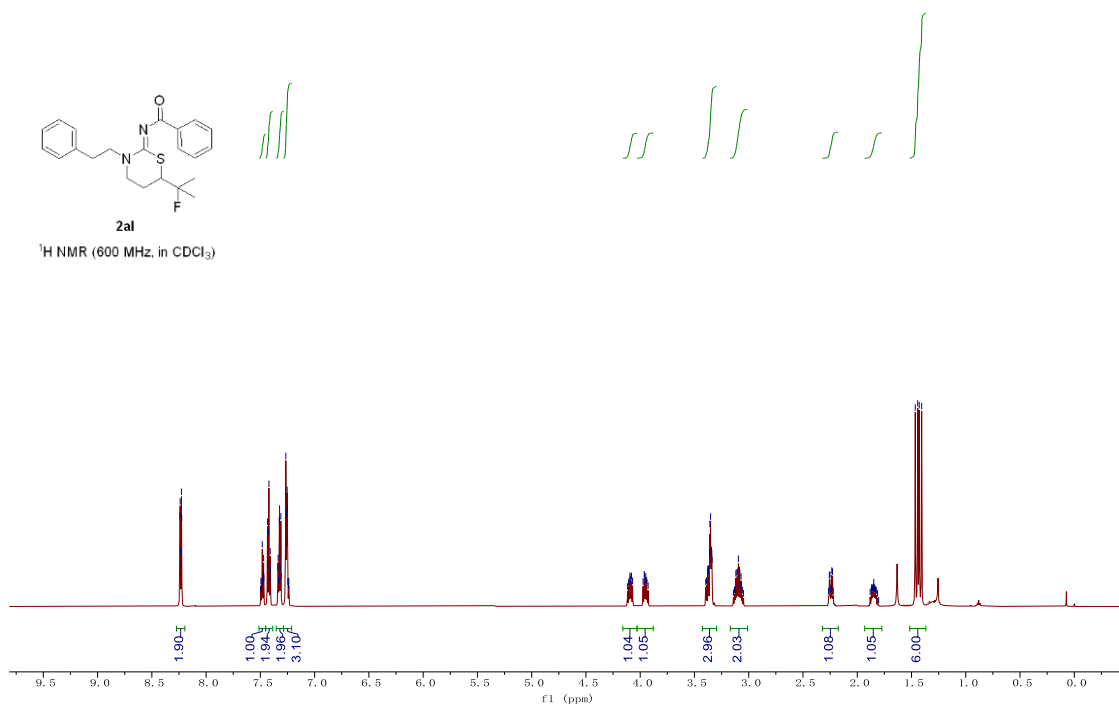

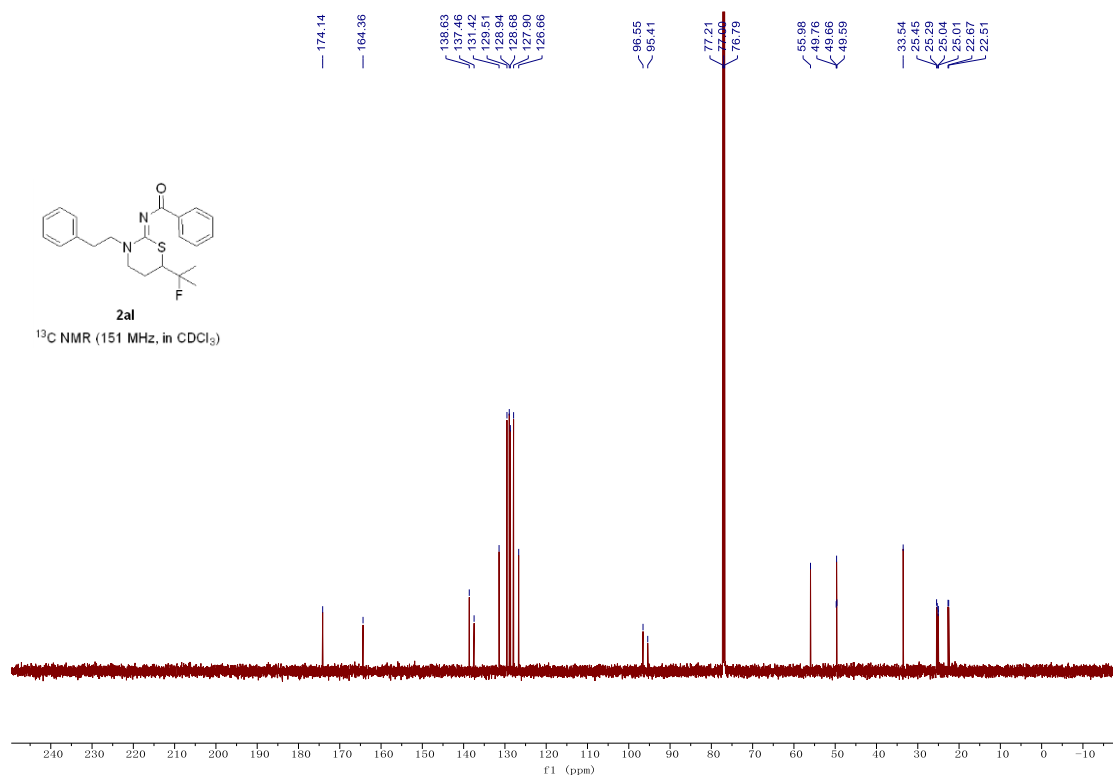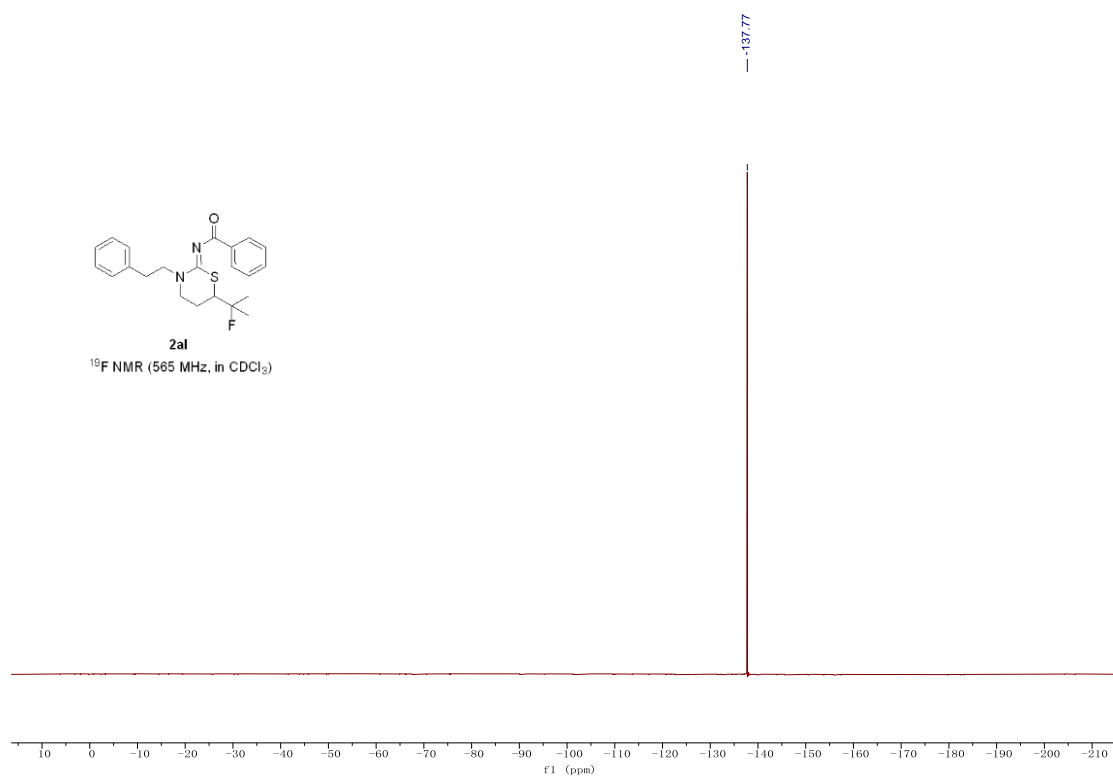

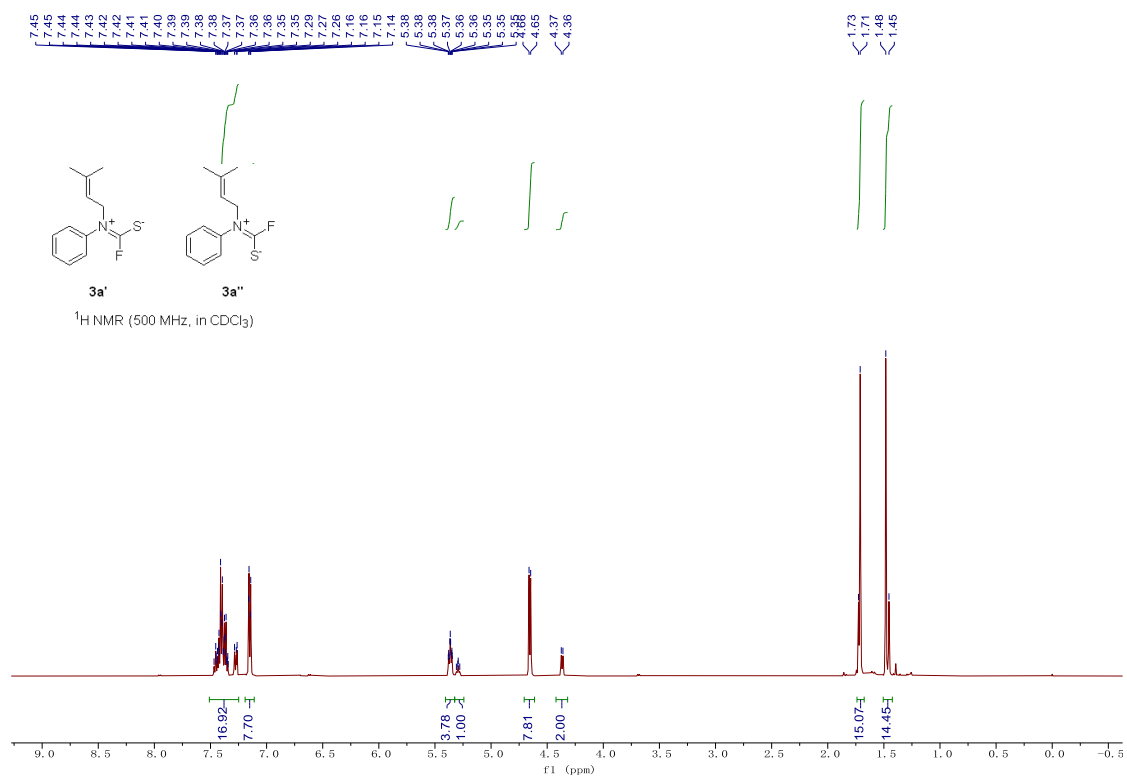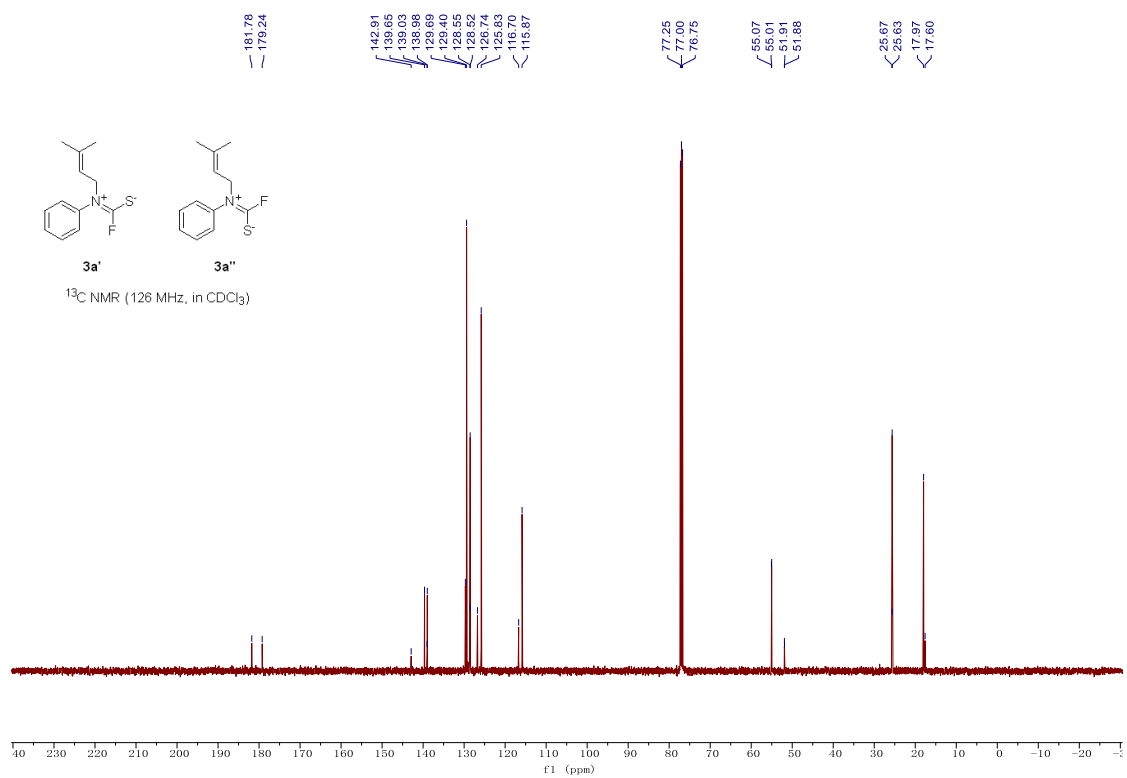

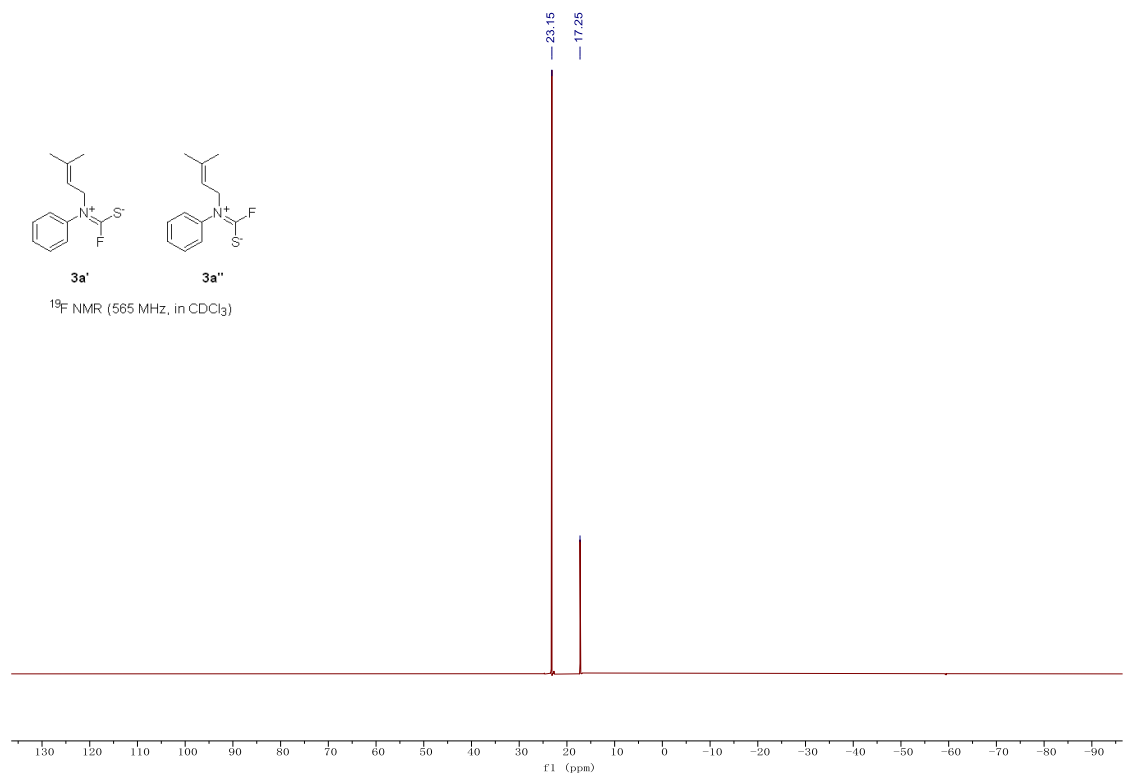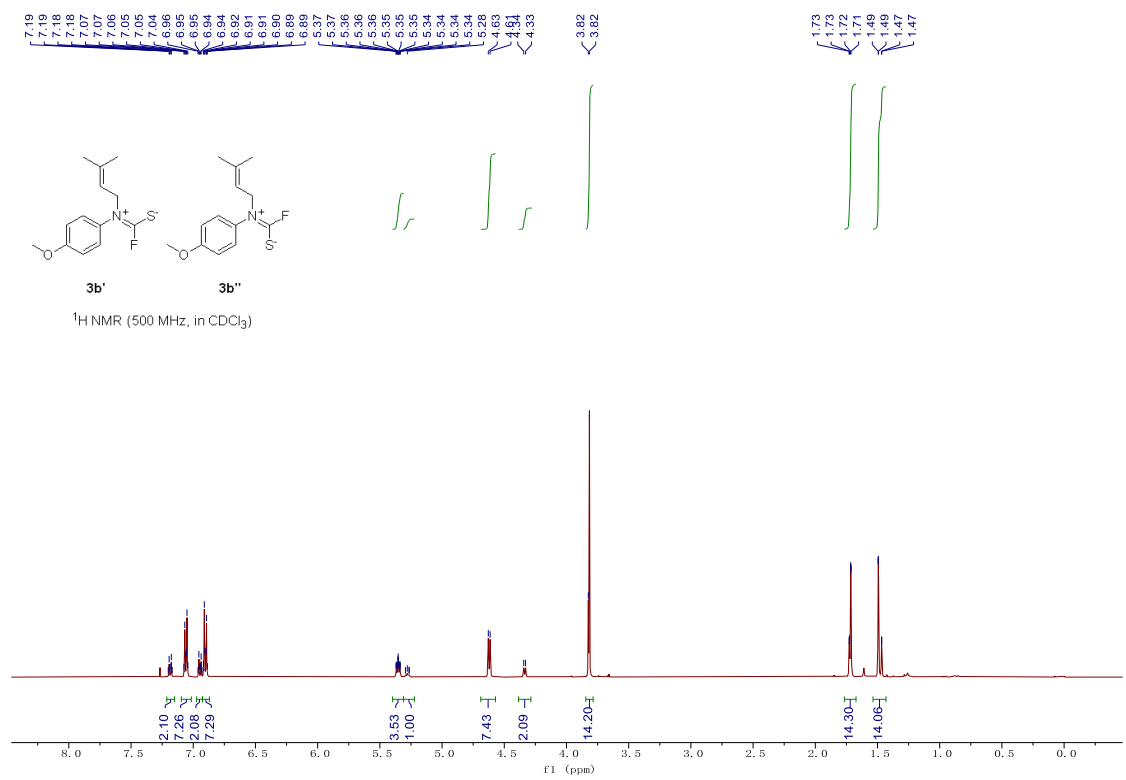

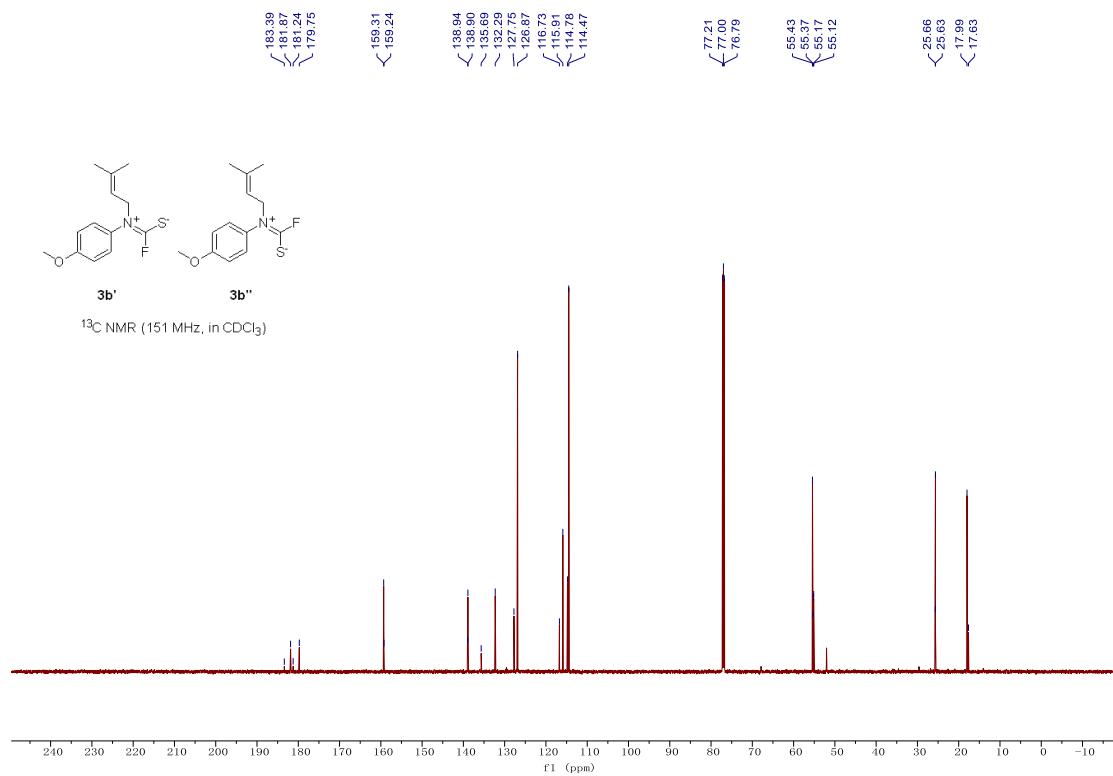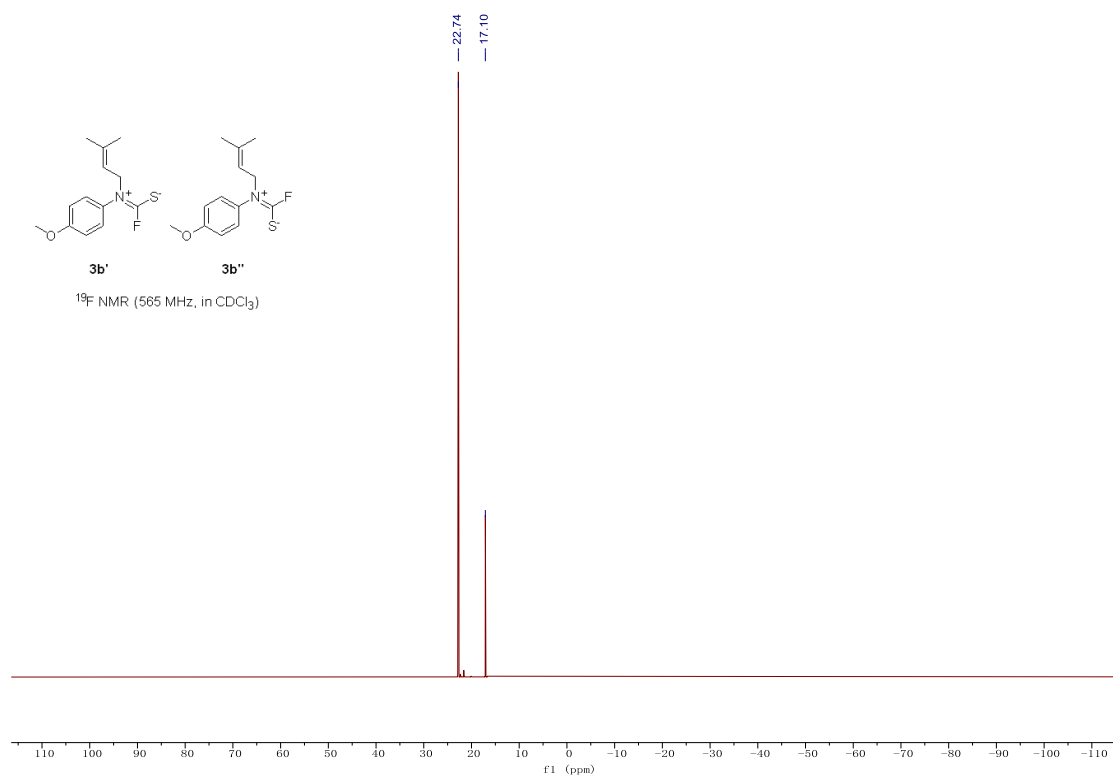

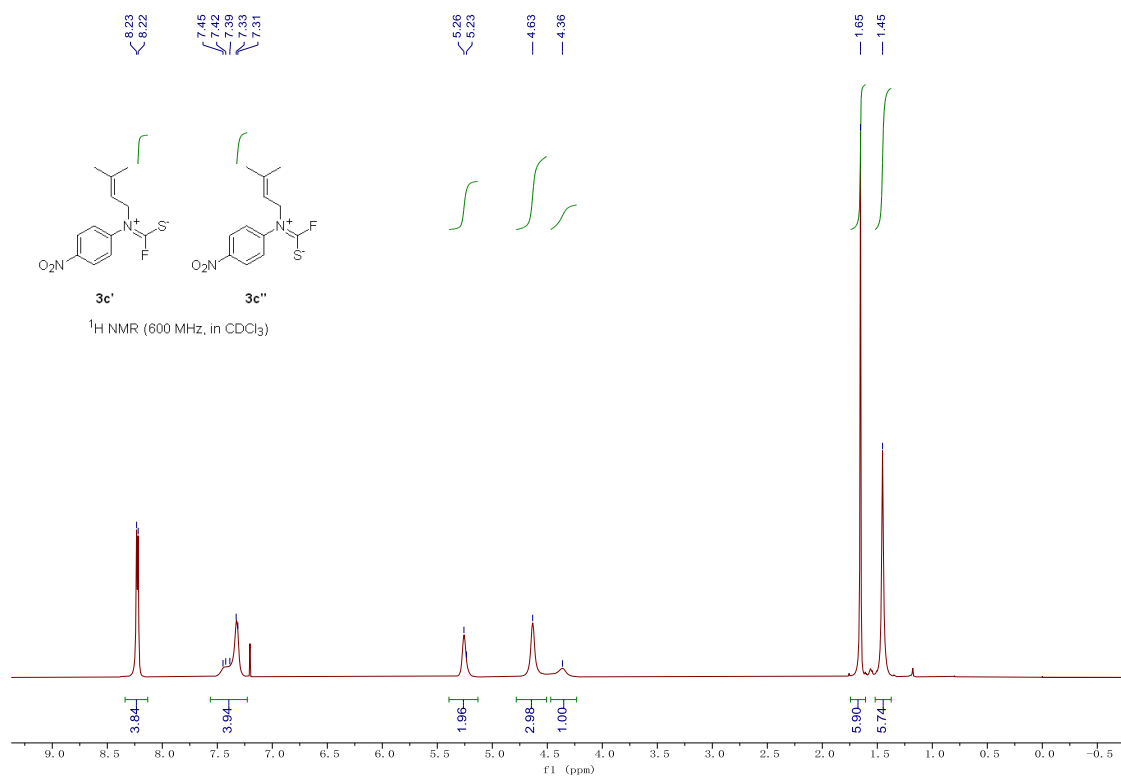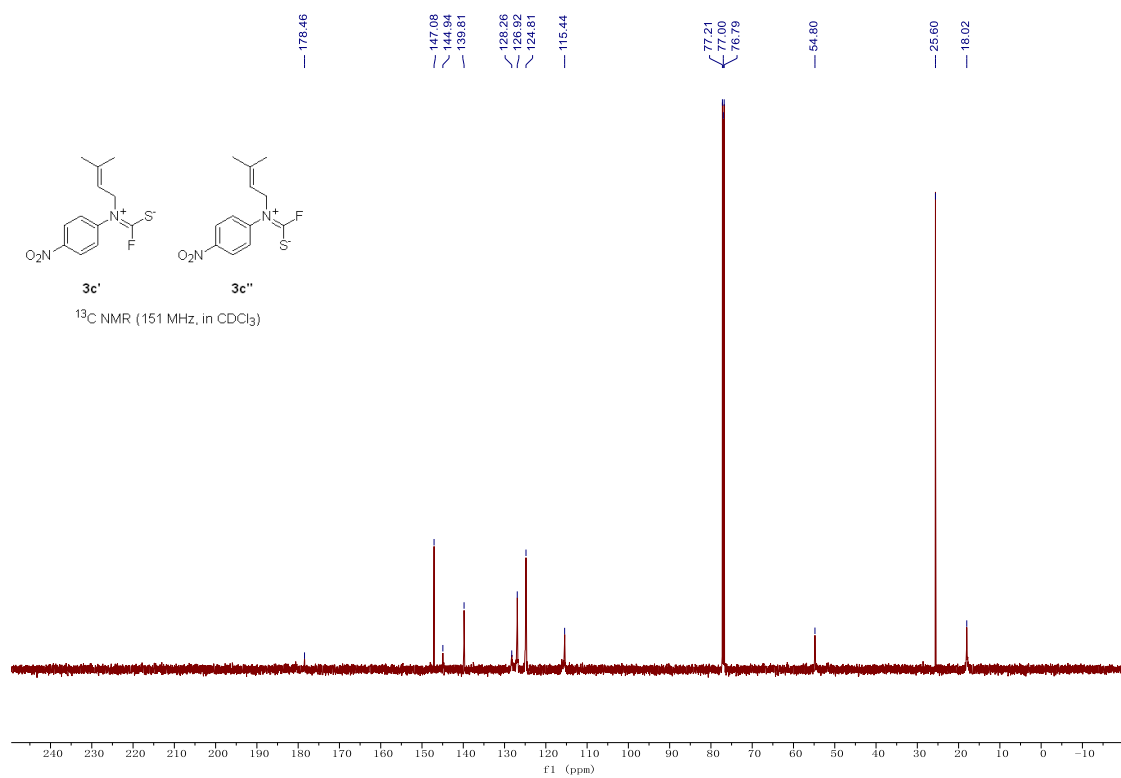

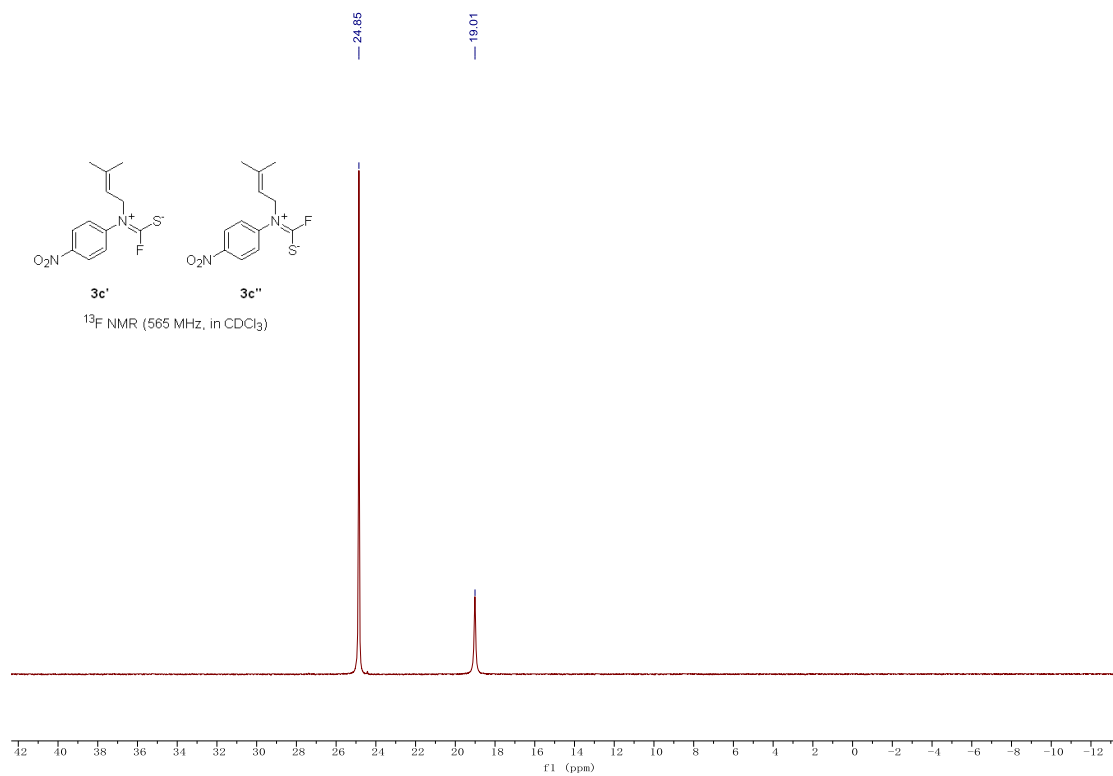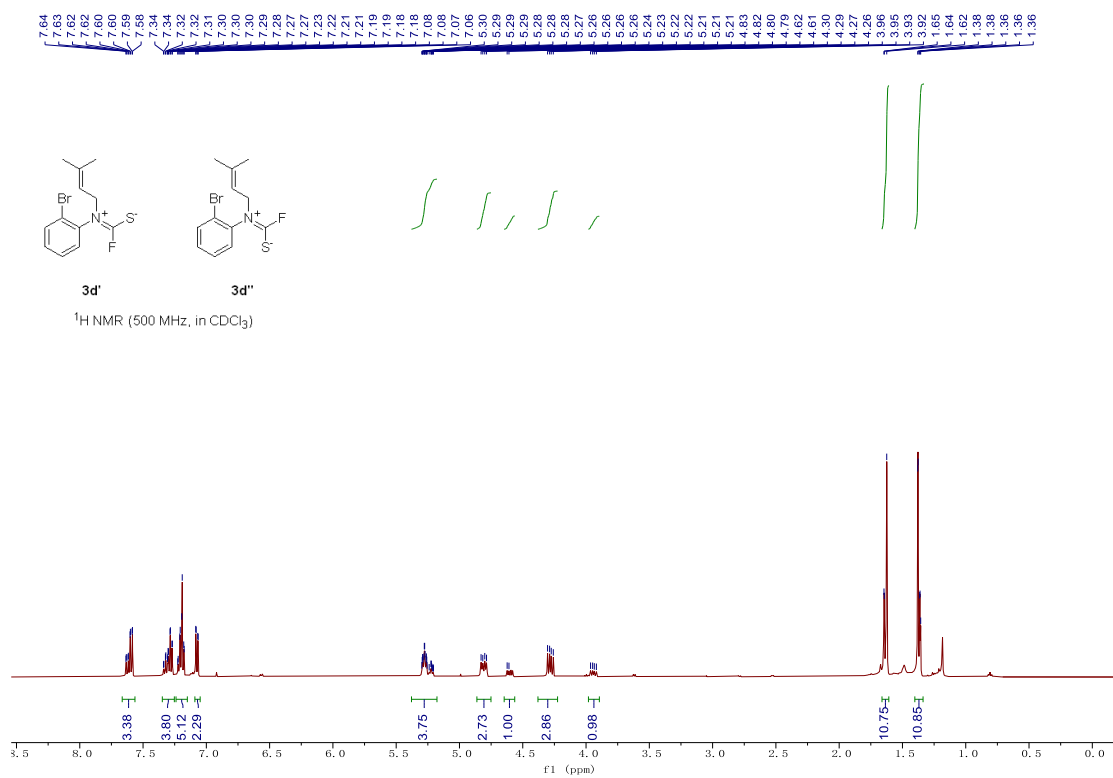



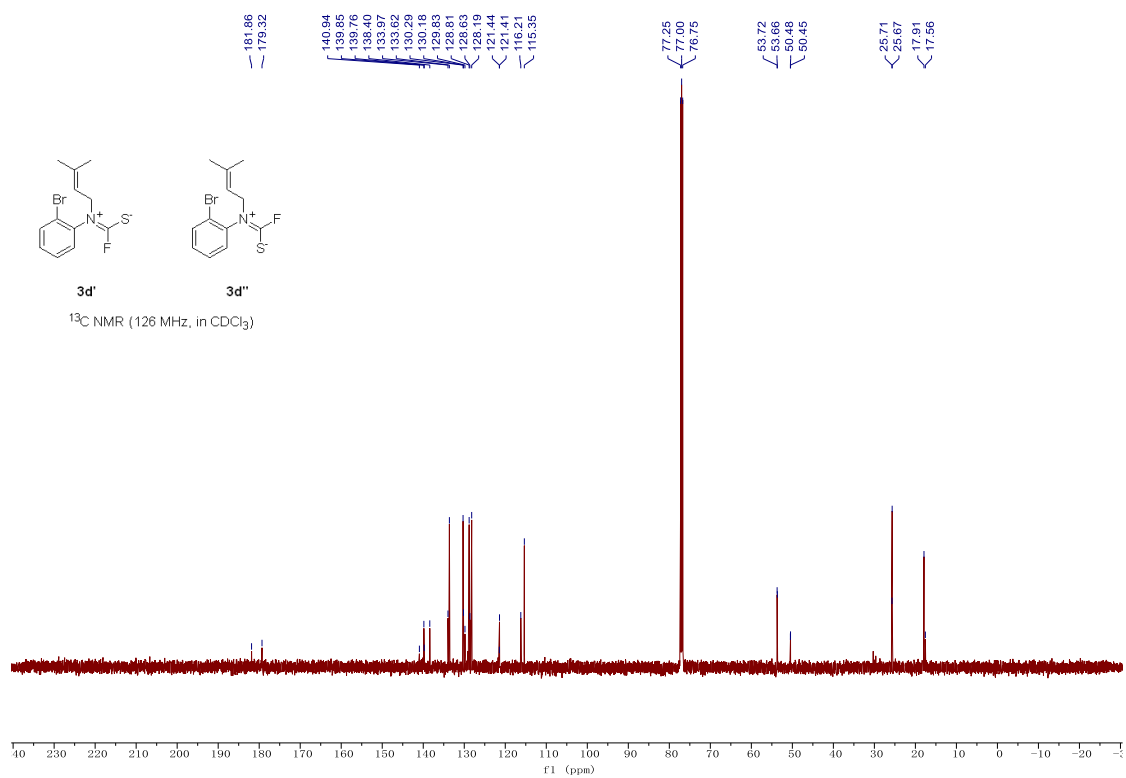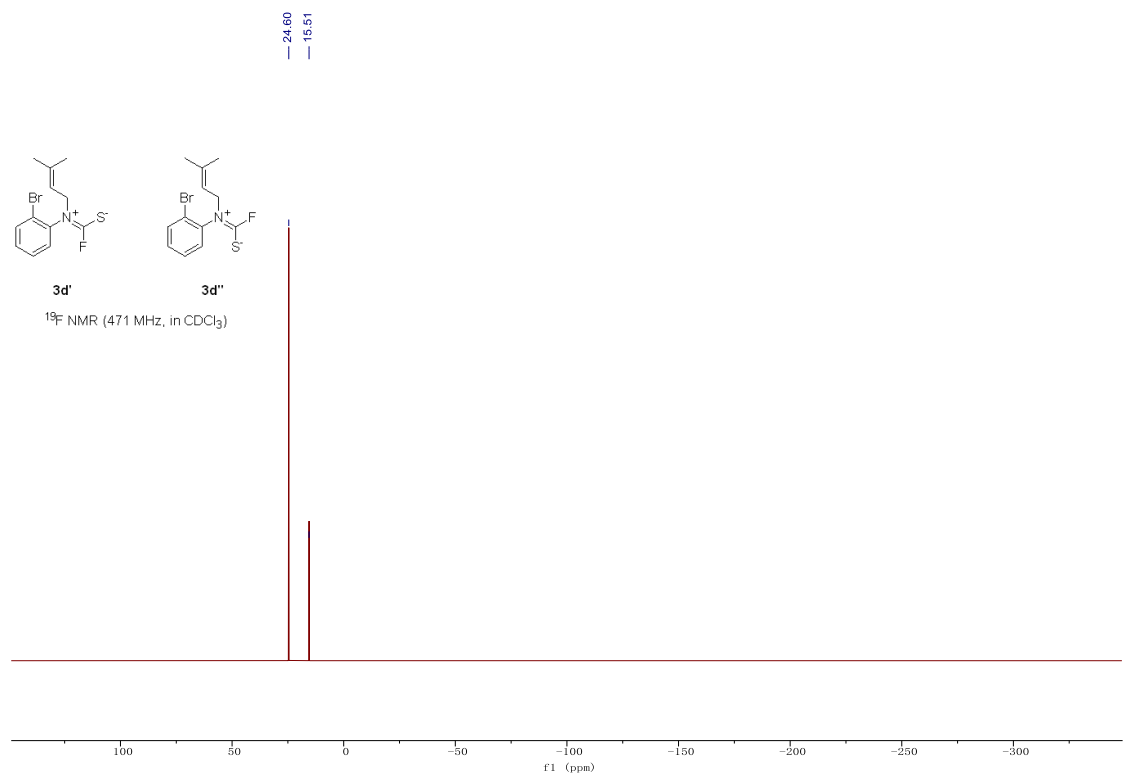

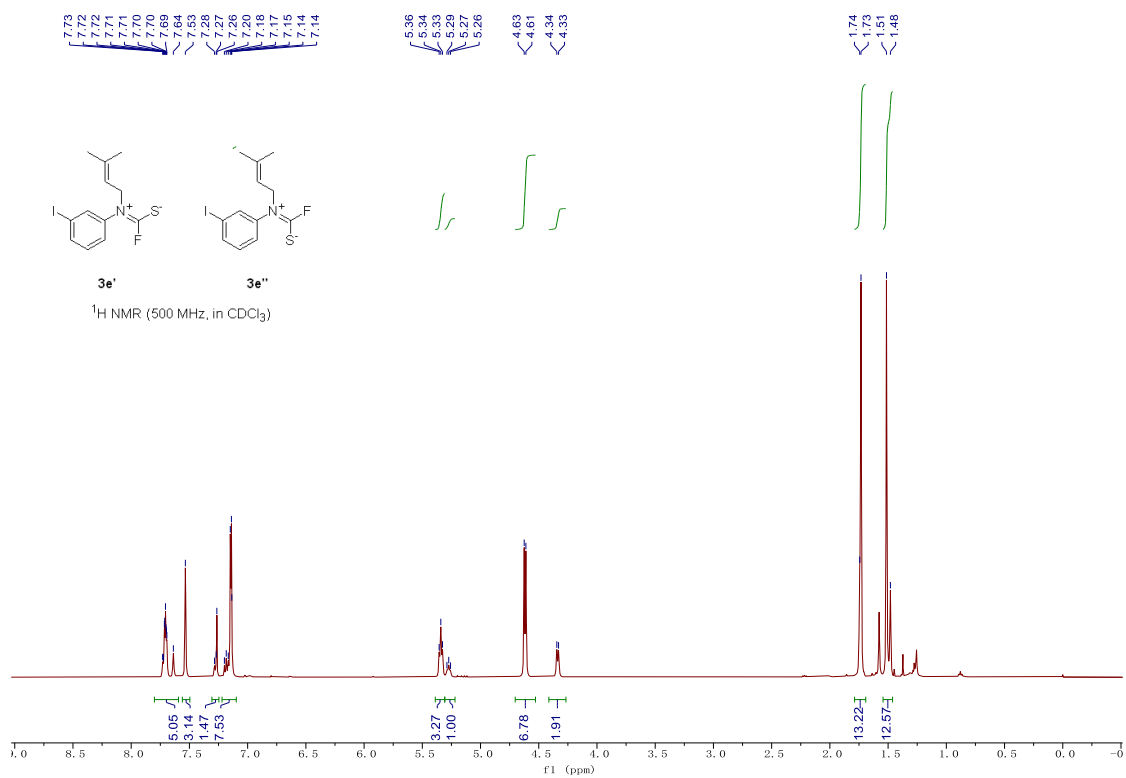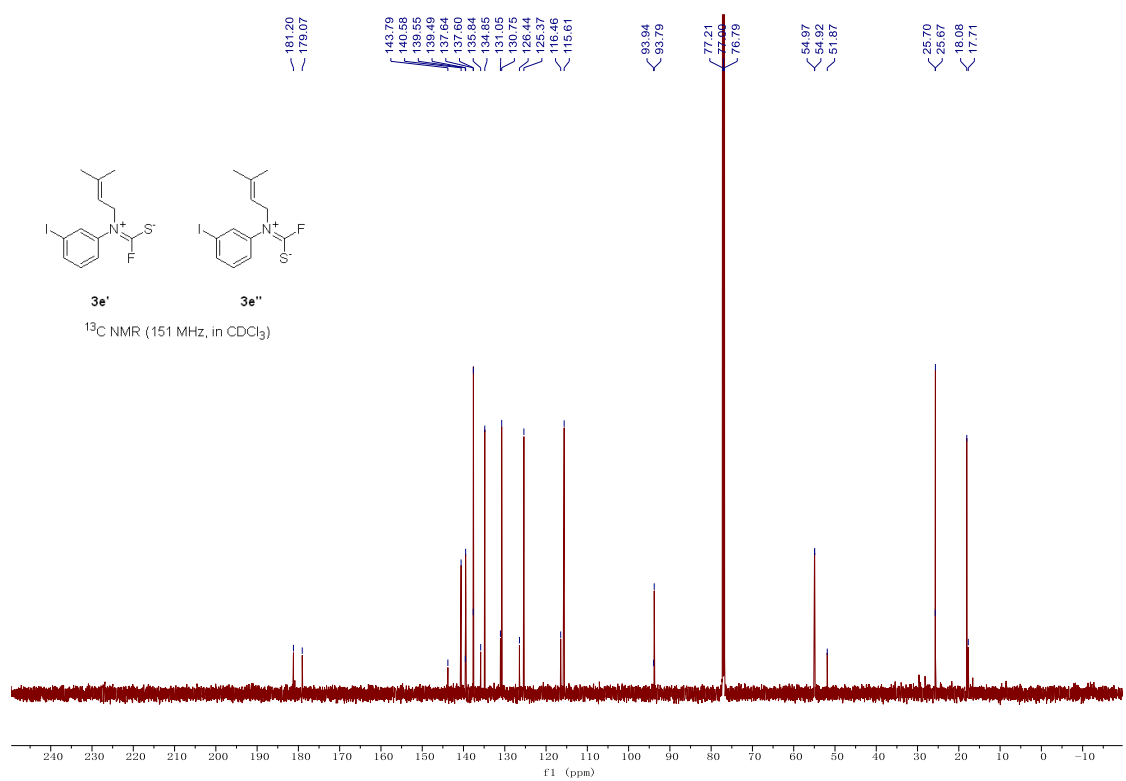

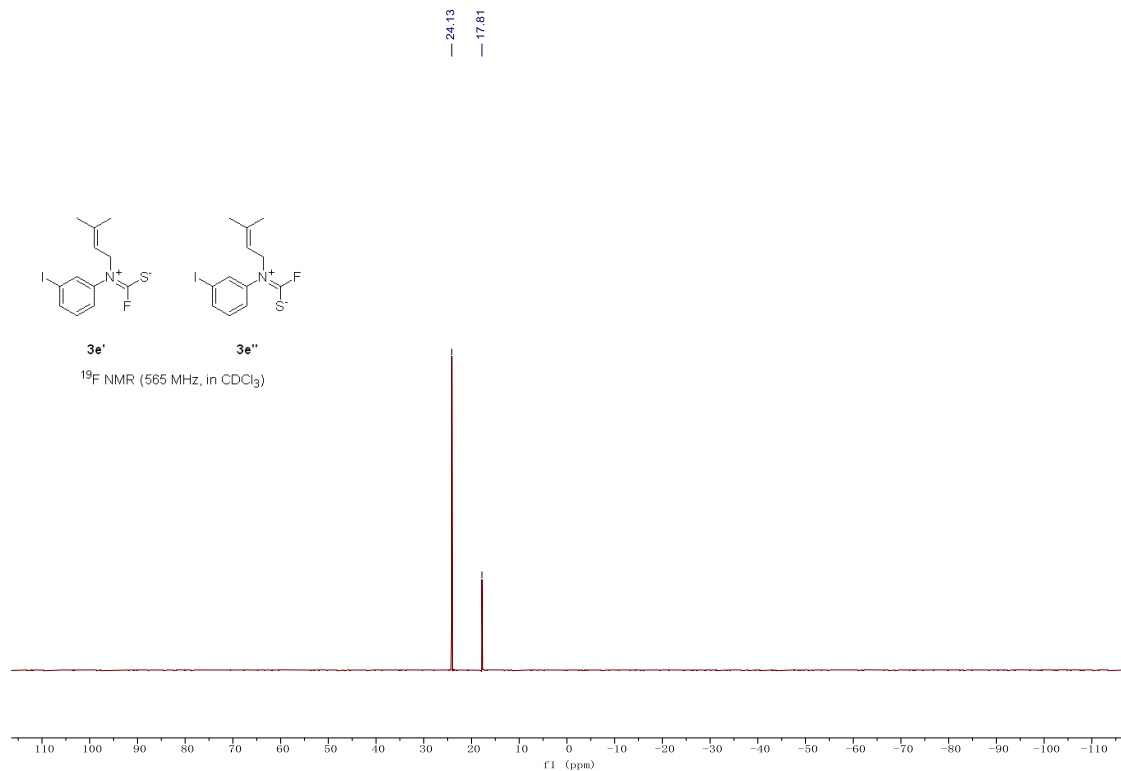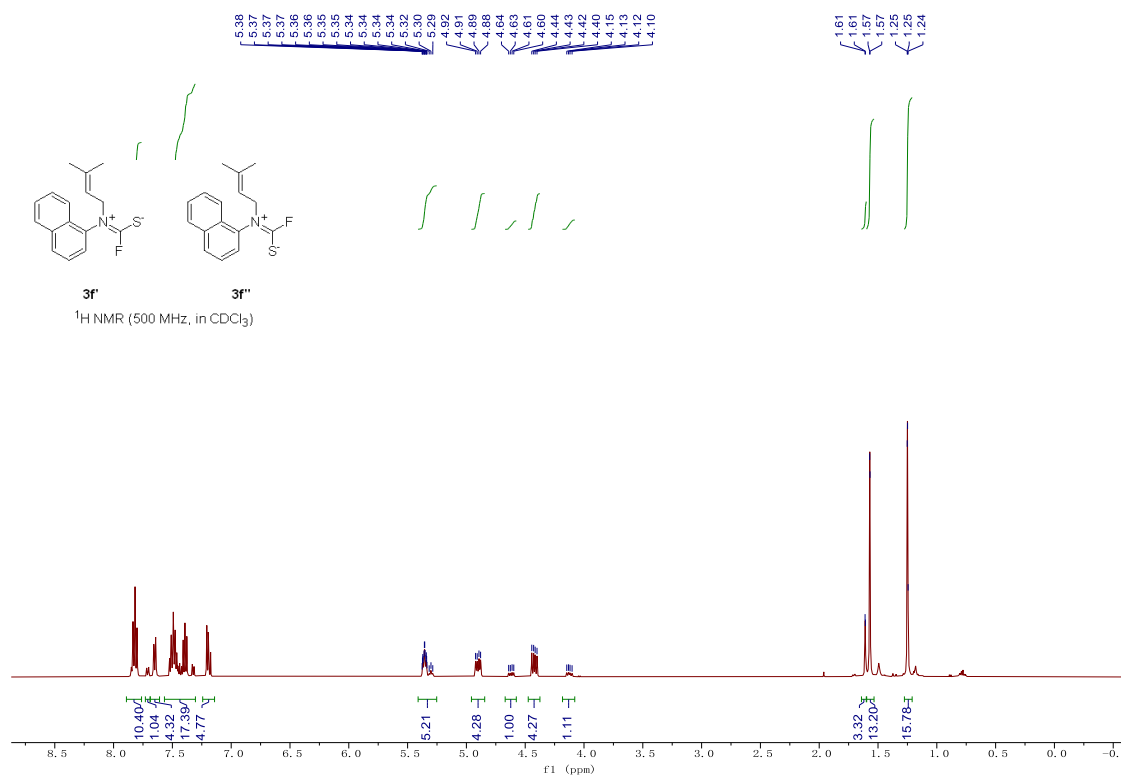

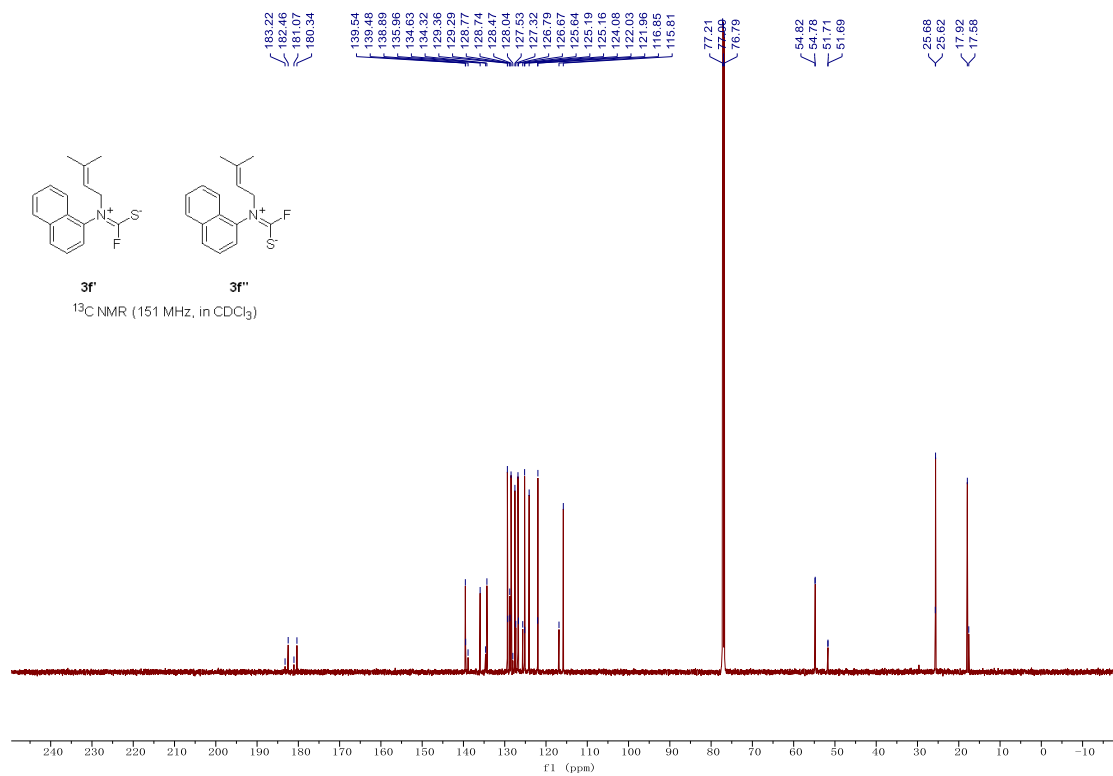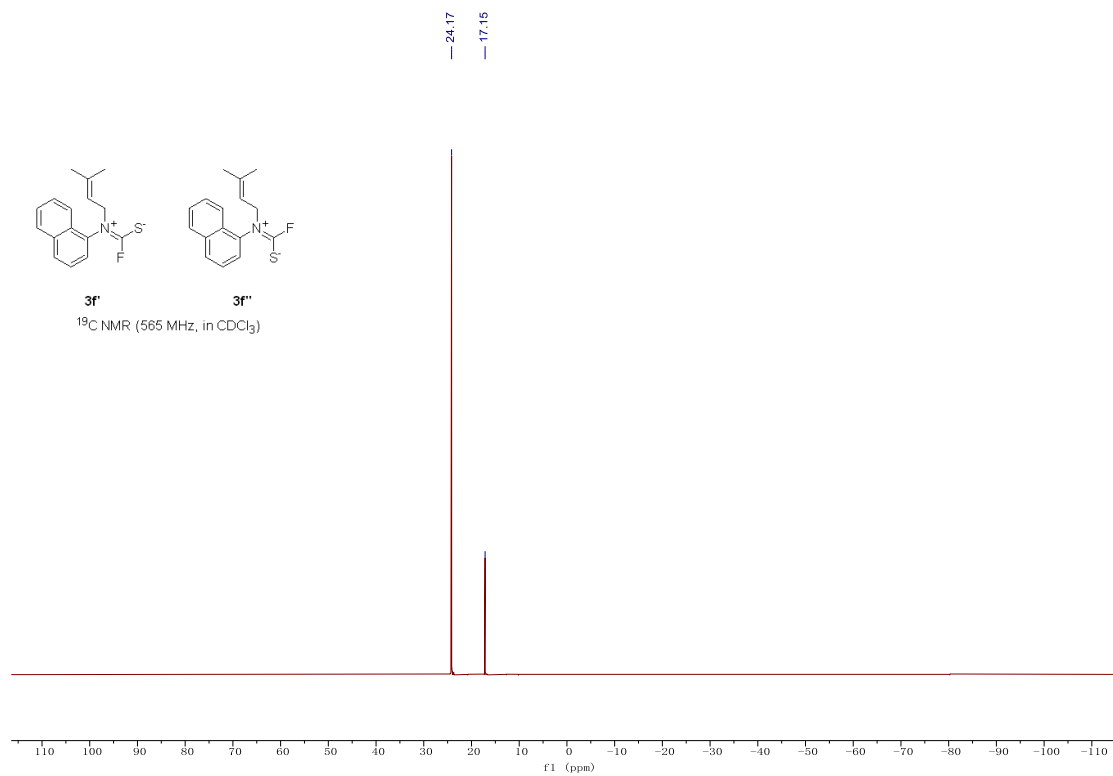

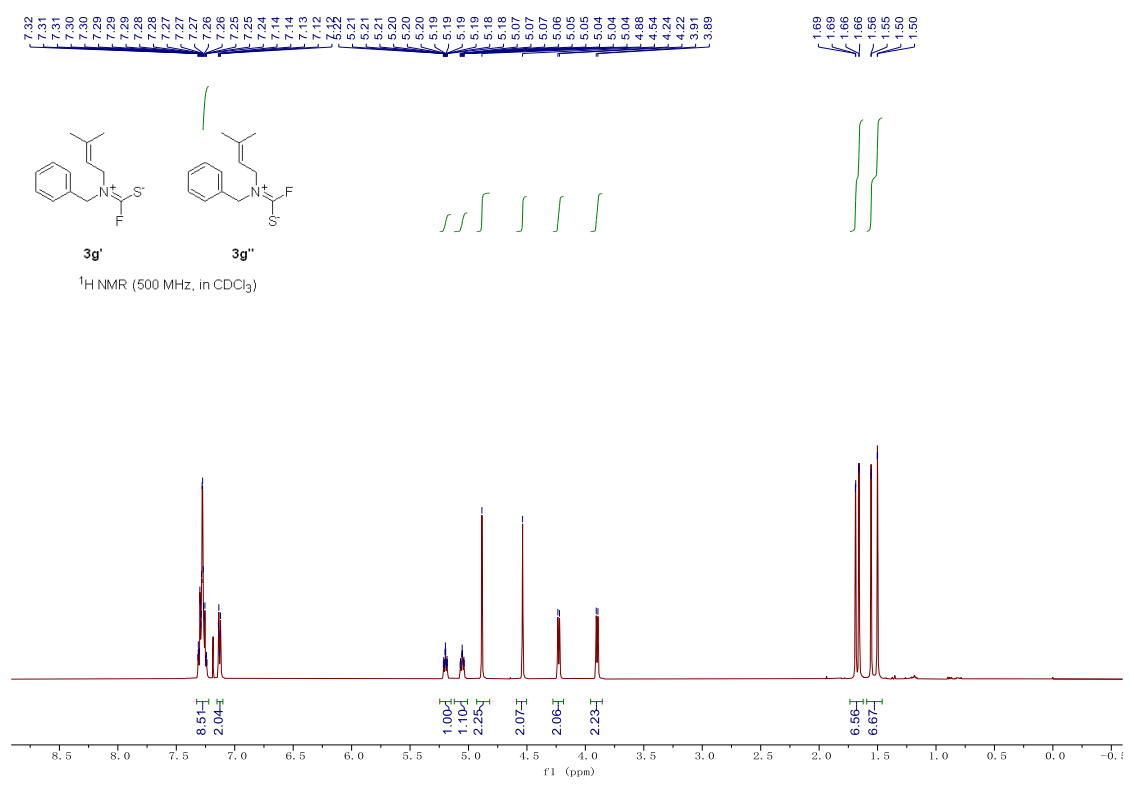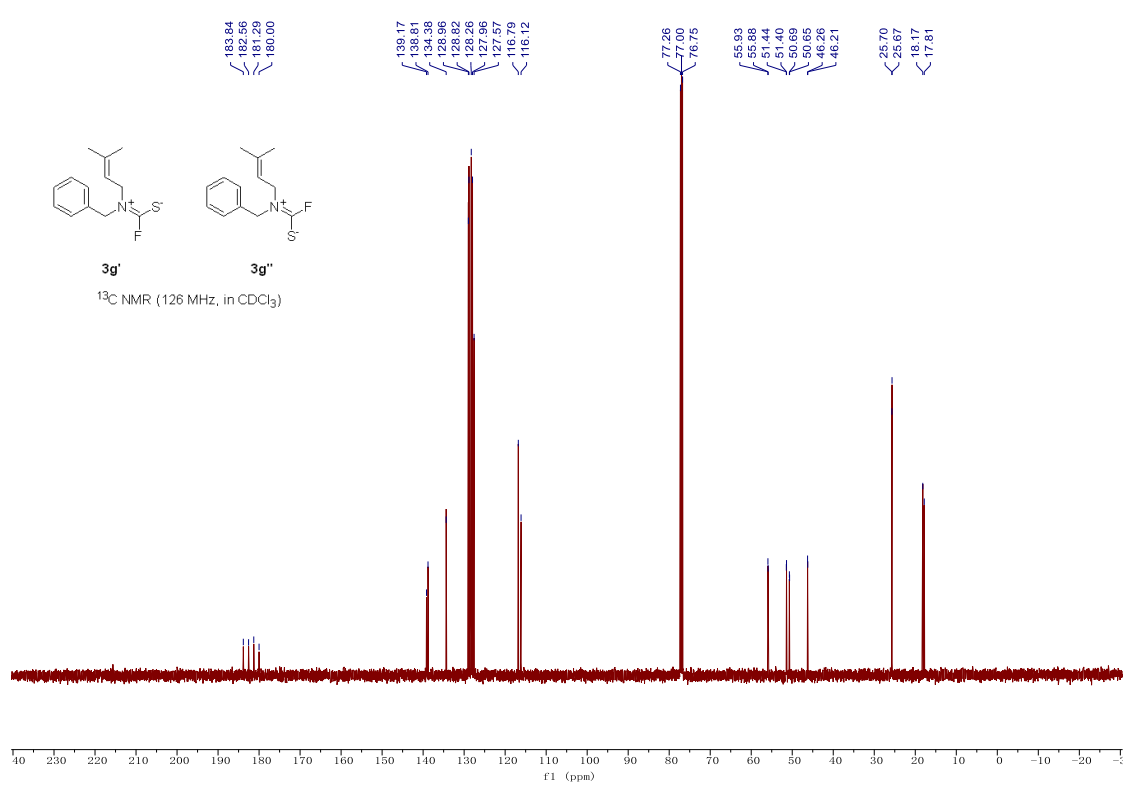

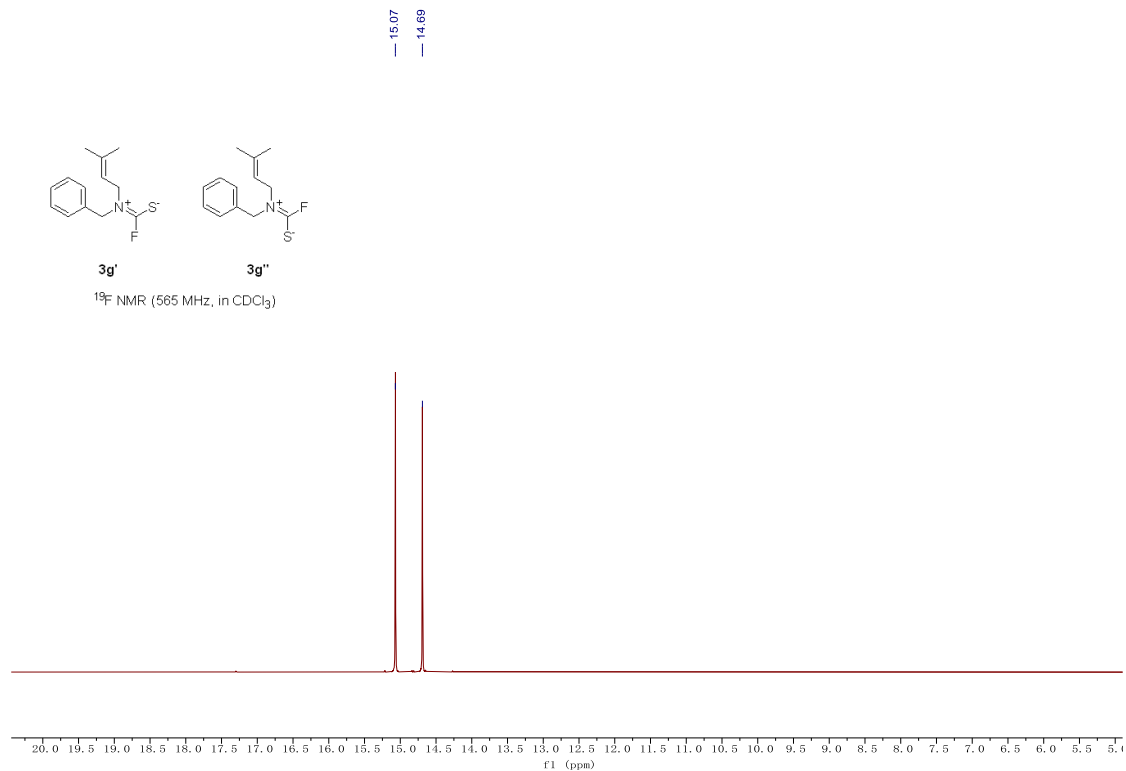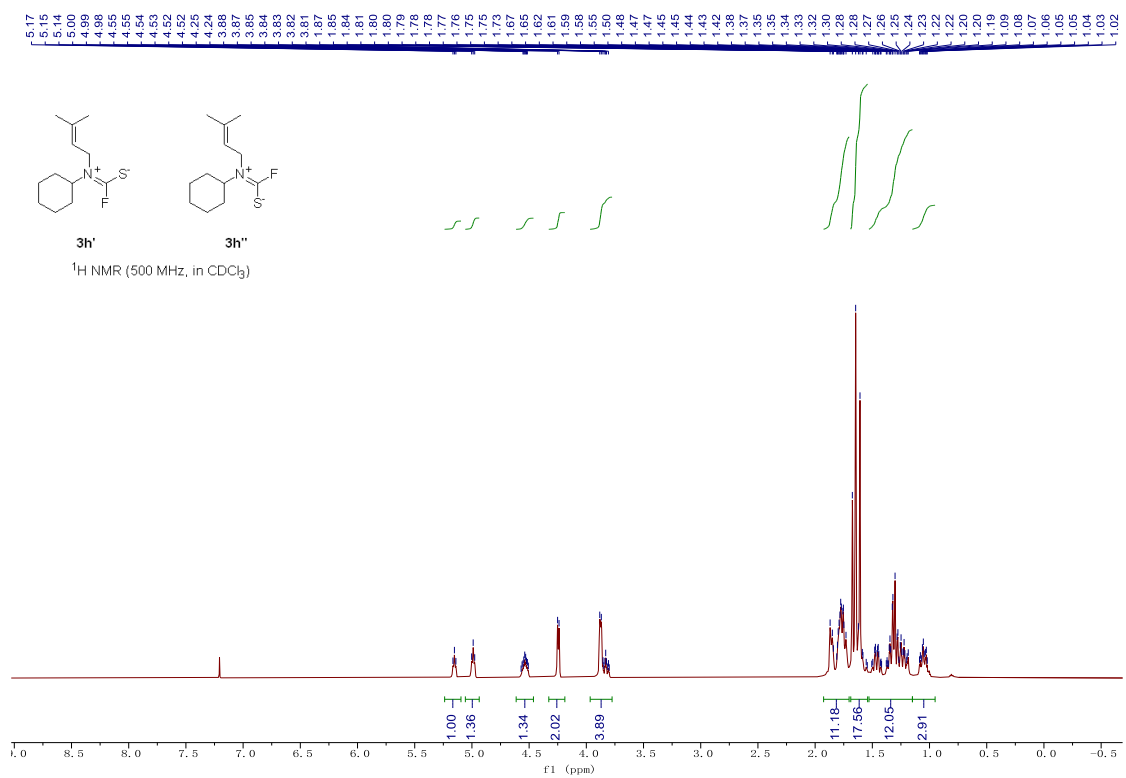

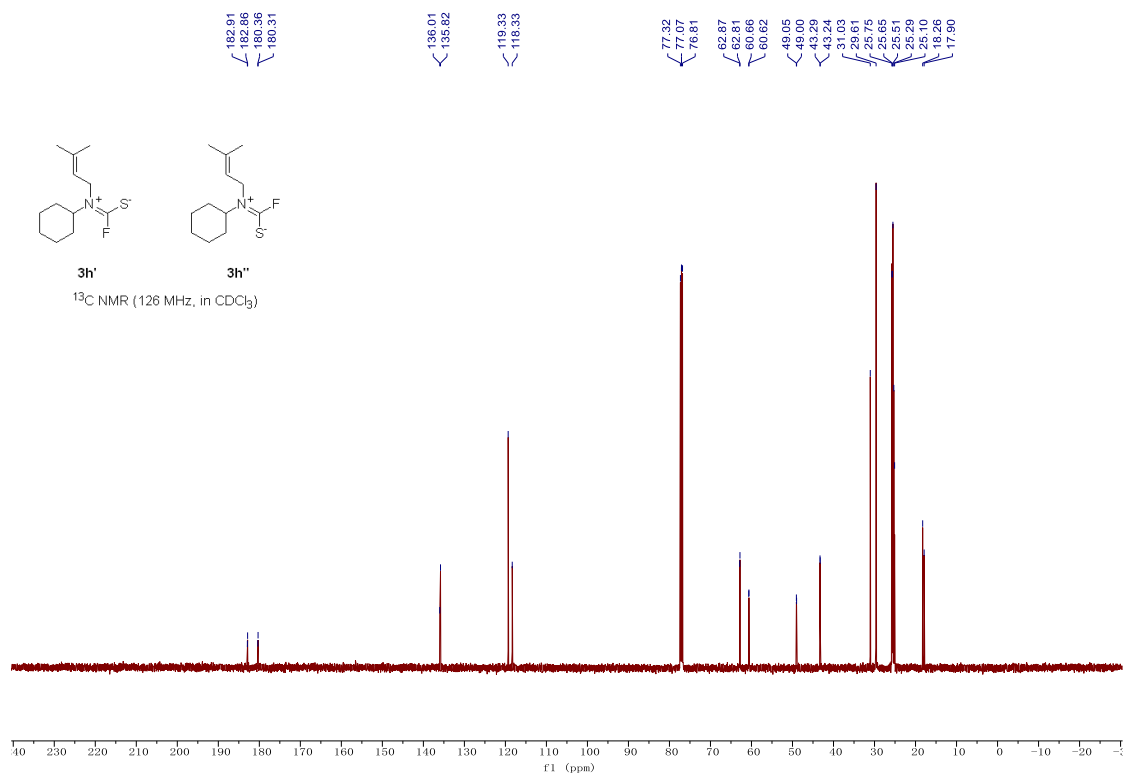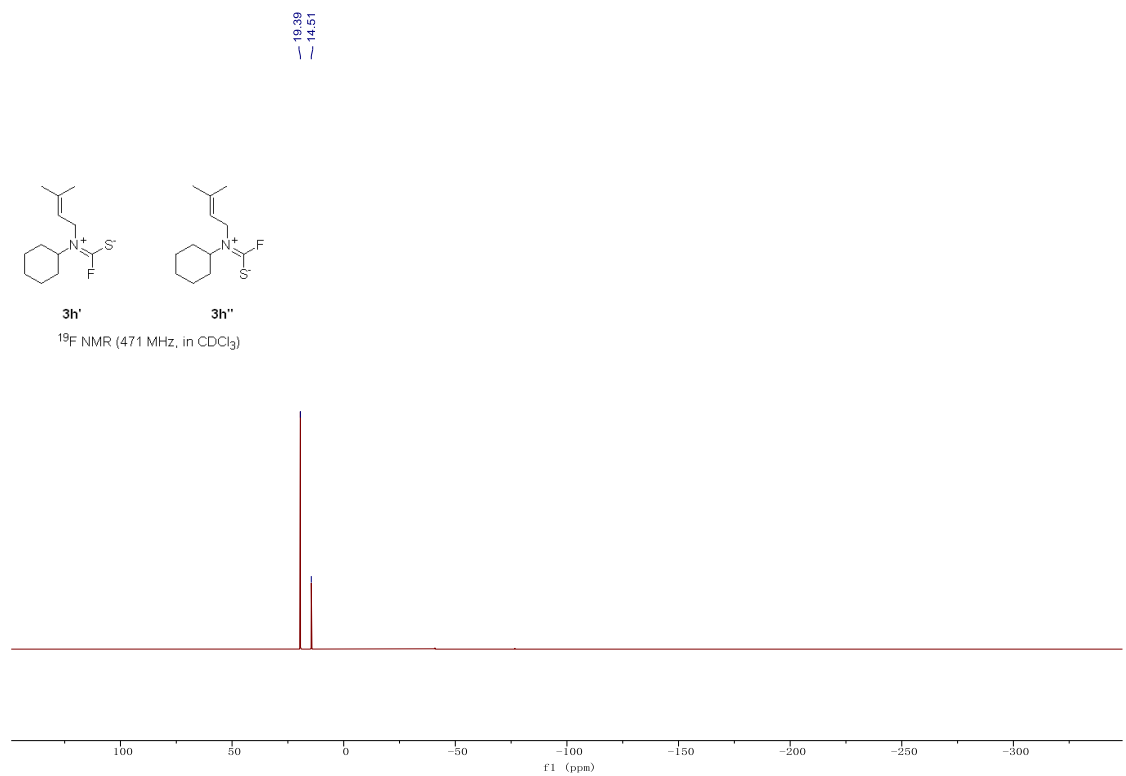

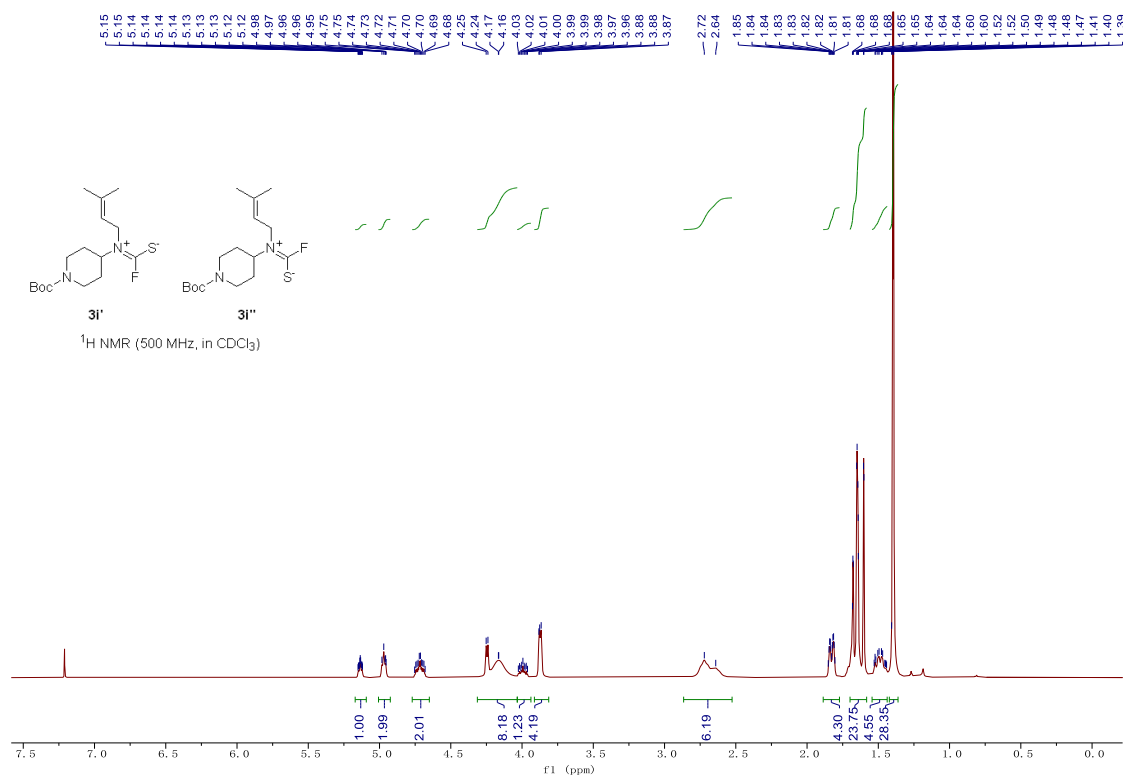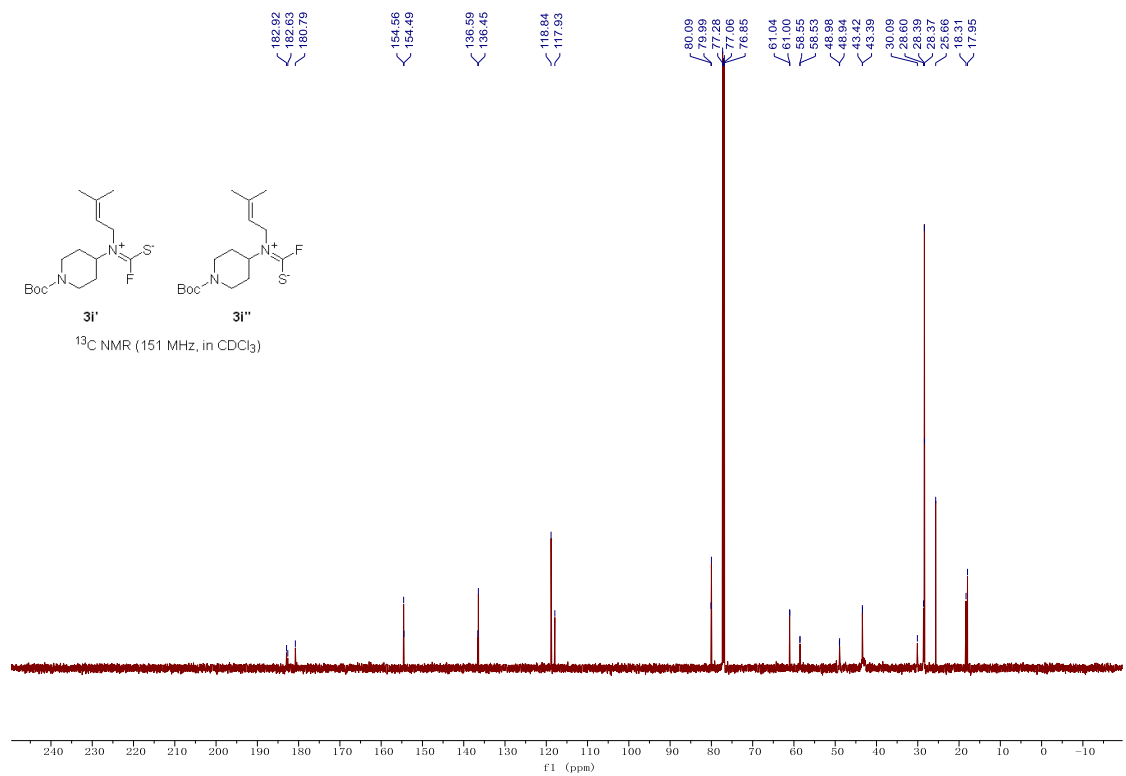



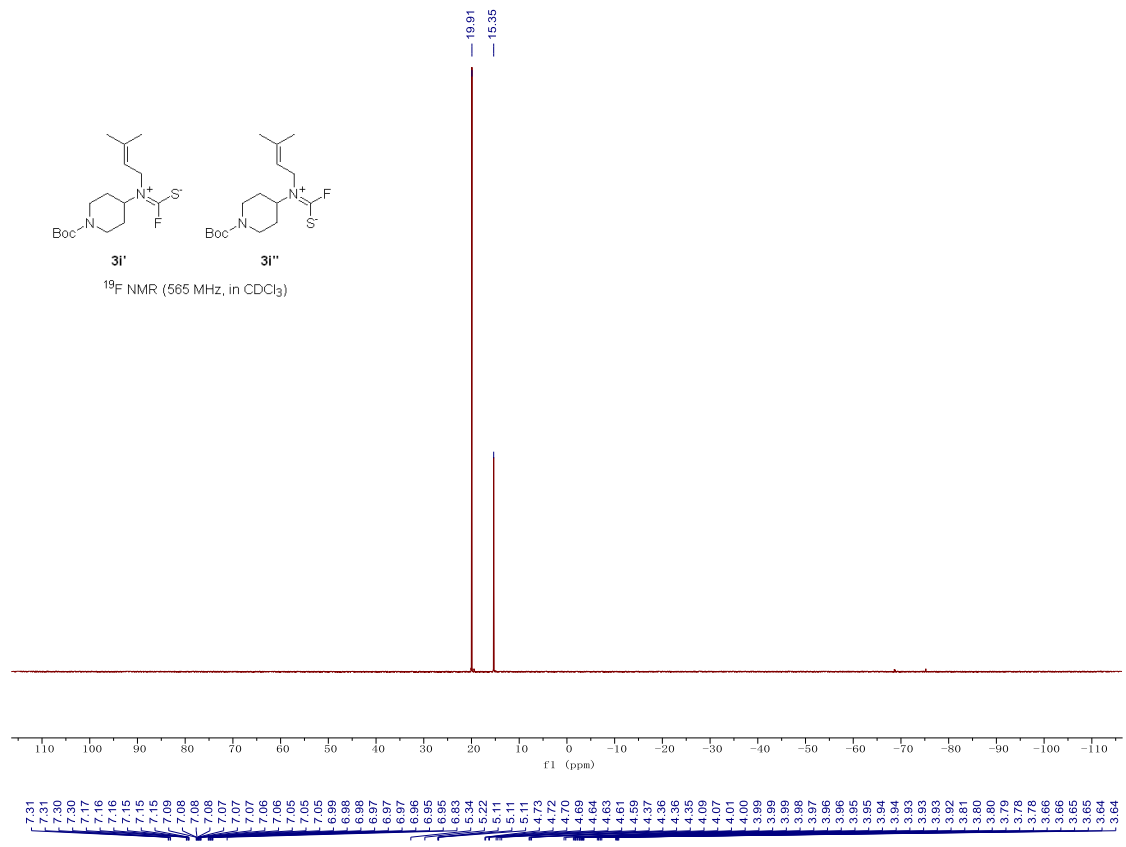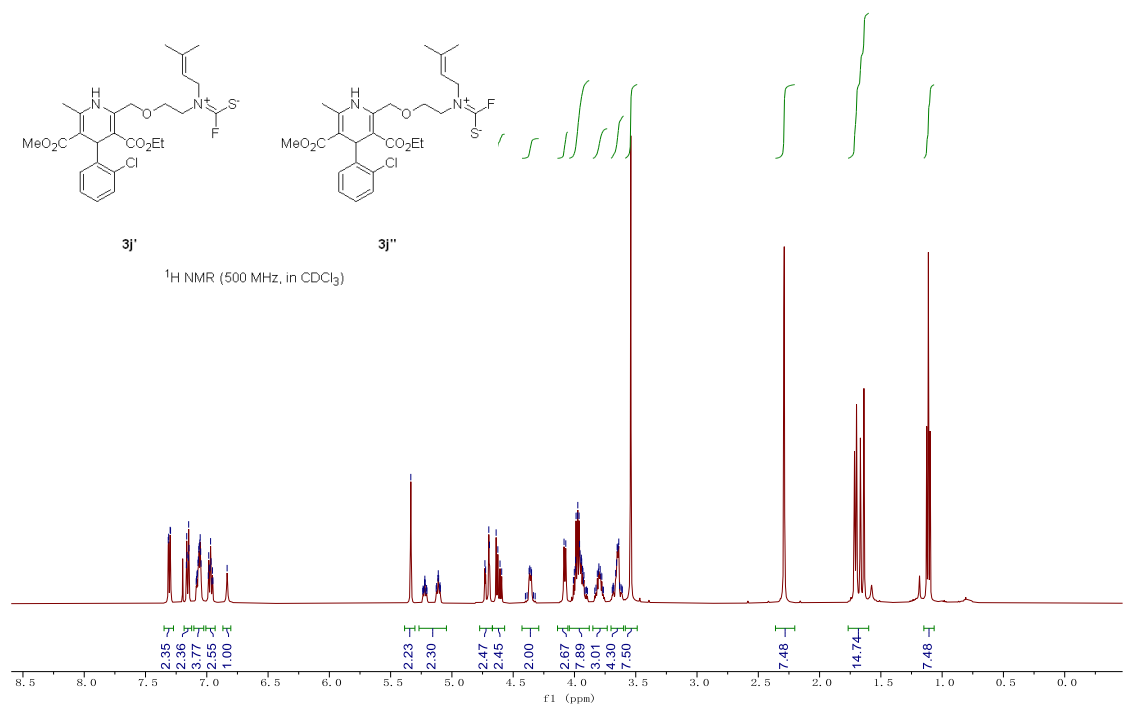

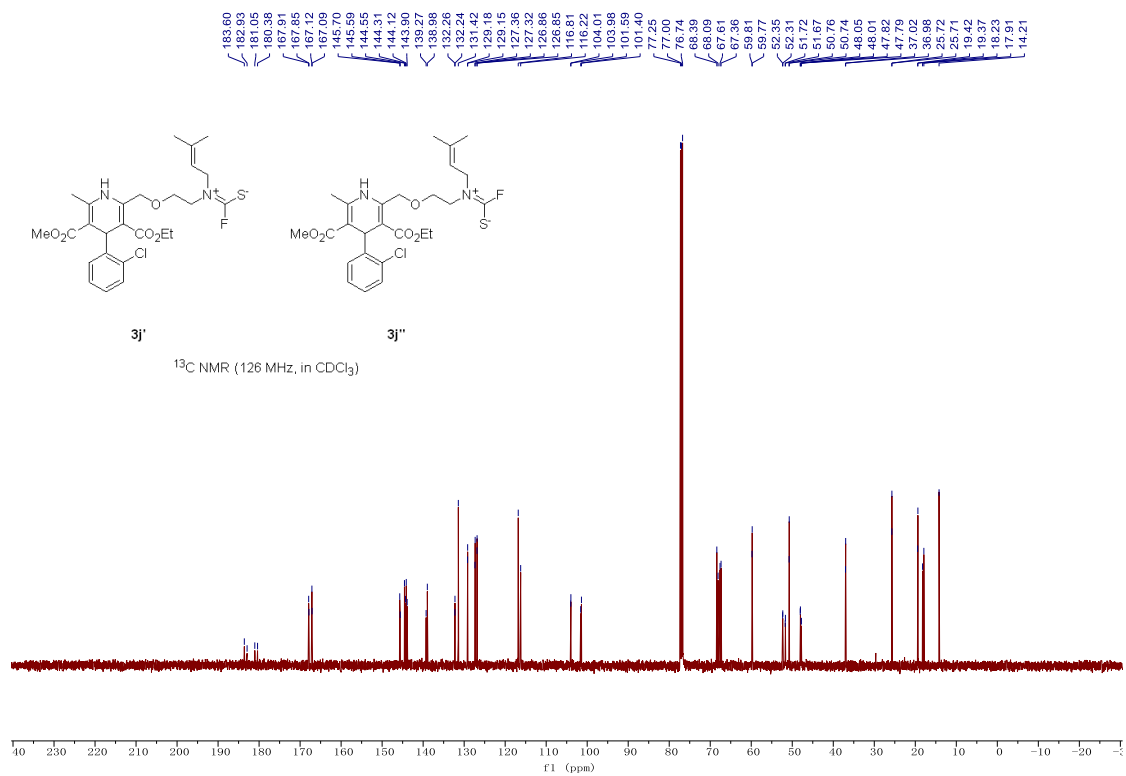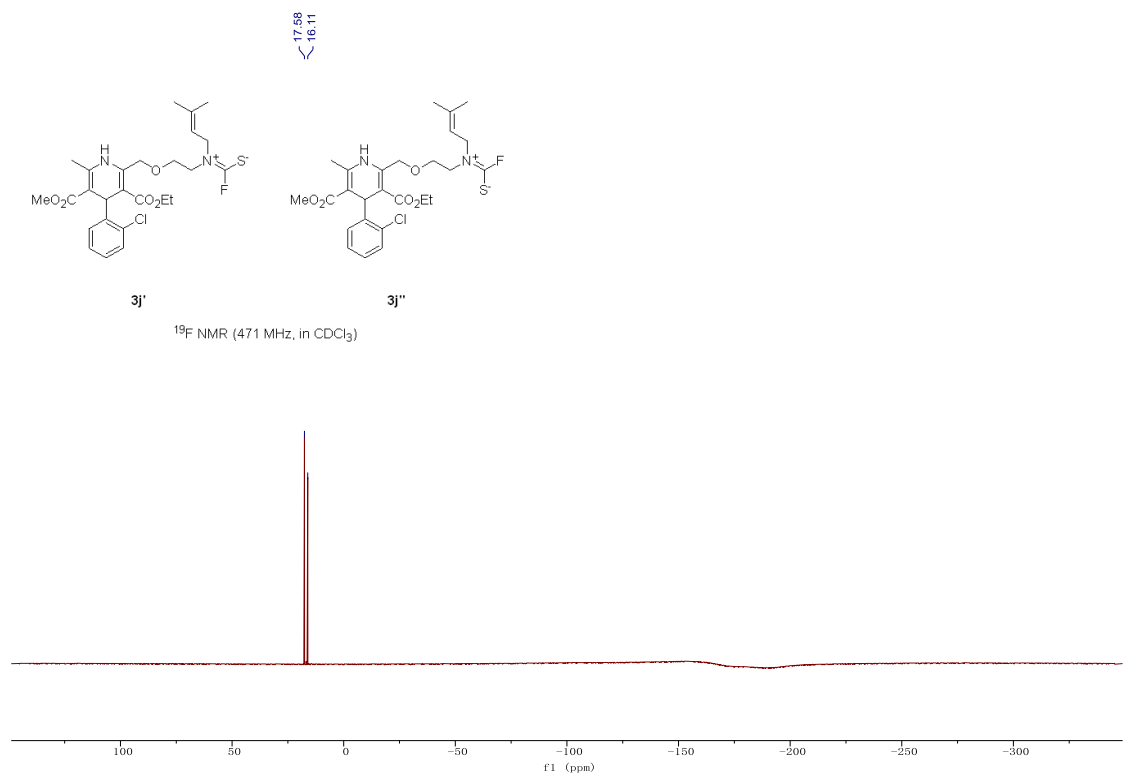

7.48  
7.46  
7.45  
7.43  
7.42  
7.42  
7.41  
7.41  
7.40  
7.39  
7.38  
7.38  
7.37  
7.36  
7.36  
7.34  
7.34  
7.33  
7.33  
7.31  
7.31  
7.29  
7.29  
7.28  
7.28  
7.27  
7.27  
7.26  
7.26  
7.25  
7.20  
7.20  
7.19  
7.18  
6.54  
6.54  
6.48  
6.38  
6.37  
6.36  
6.36  
6.35  
6.35  
6.26  
6.26  
6.24  
6.24  
6.23  
6.23  
6.21  
6.21  
4.79  
4.79  
4.52  
4.52

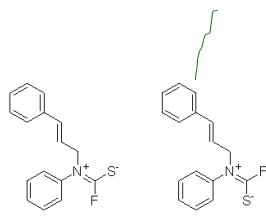

<sup>1</sup>H NMR (600 MHz, in CDCl<sub>3</sub>)

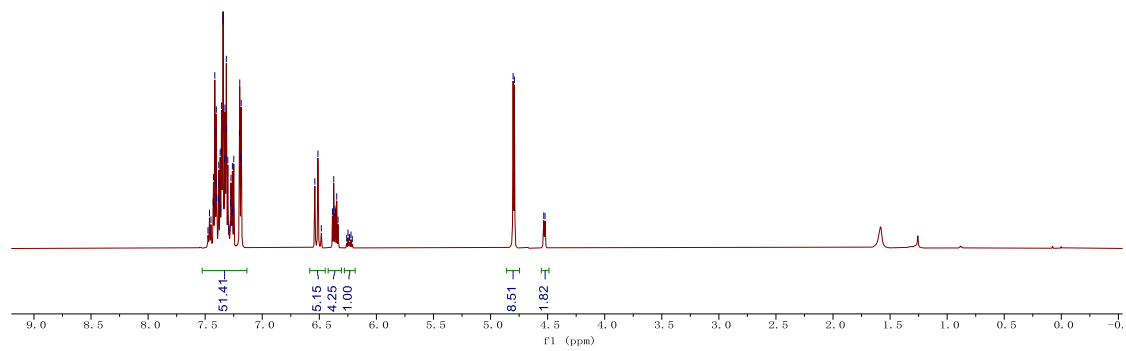

181.81  
179.68  
142.86  
139.69  
135.96  
135.67  
135.60  
135.31  
129.68  
129.68  
128.78  
128.73  
128.68  
128.61  
128.40  
128.20  
128.13  
126.60  
125.86  
121.11  
120.27  
77.21  
77.00  
76.79  
59.36  
59.31  
58.13

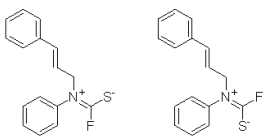

<sup>13</sup>C NMR (151 MHz, in CDCl<sub>3</sub>)

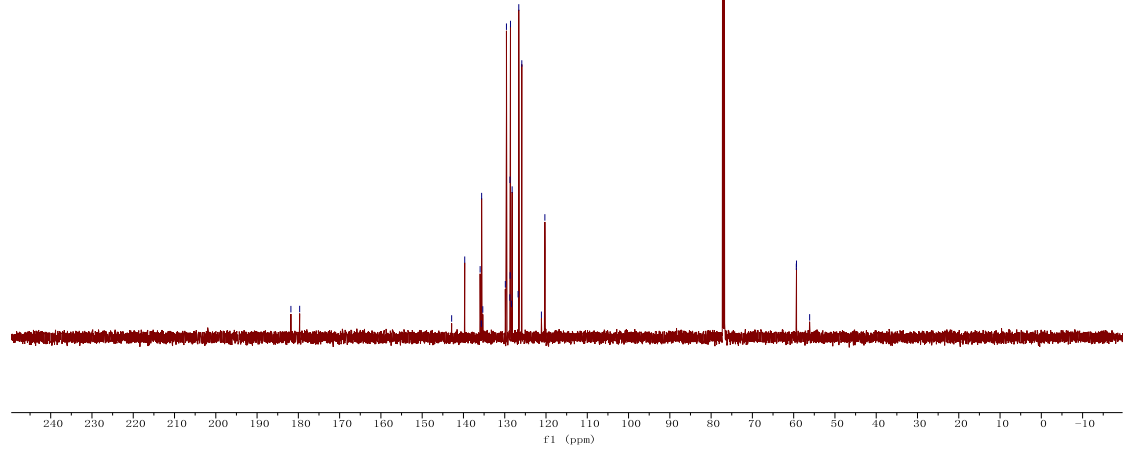

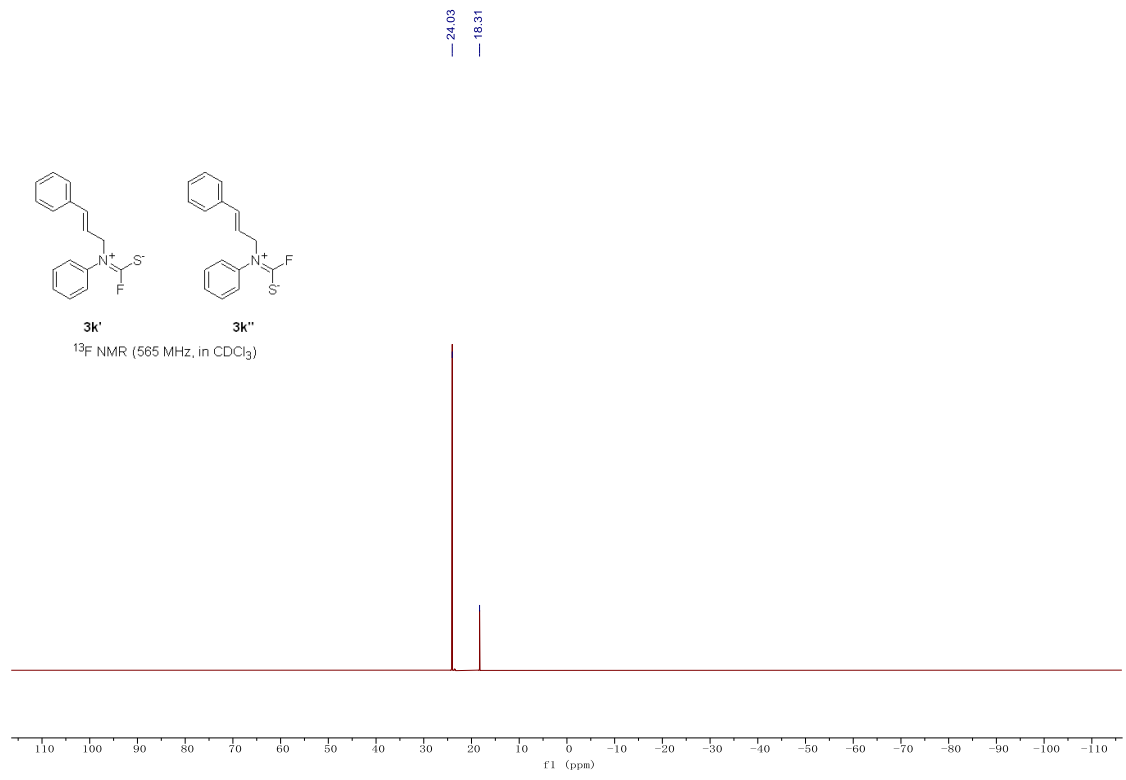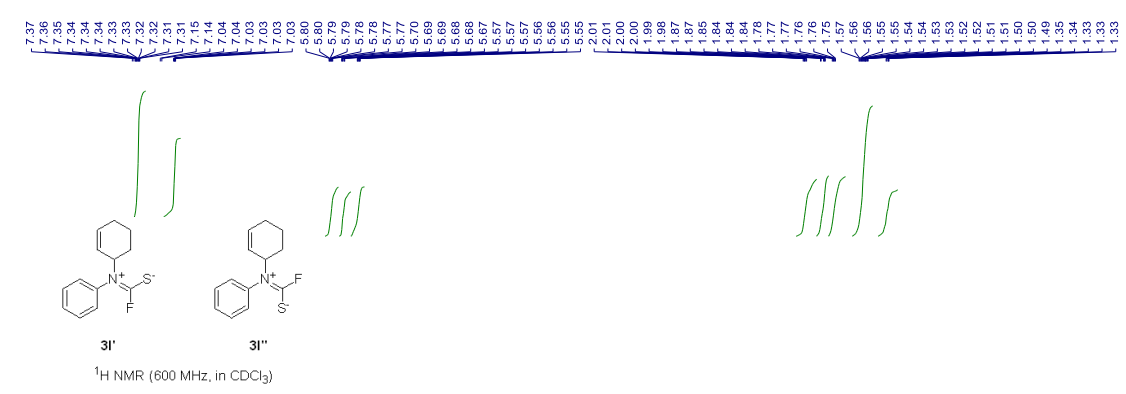

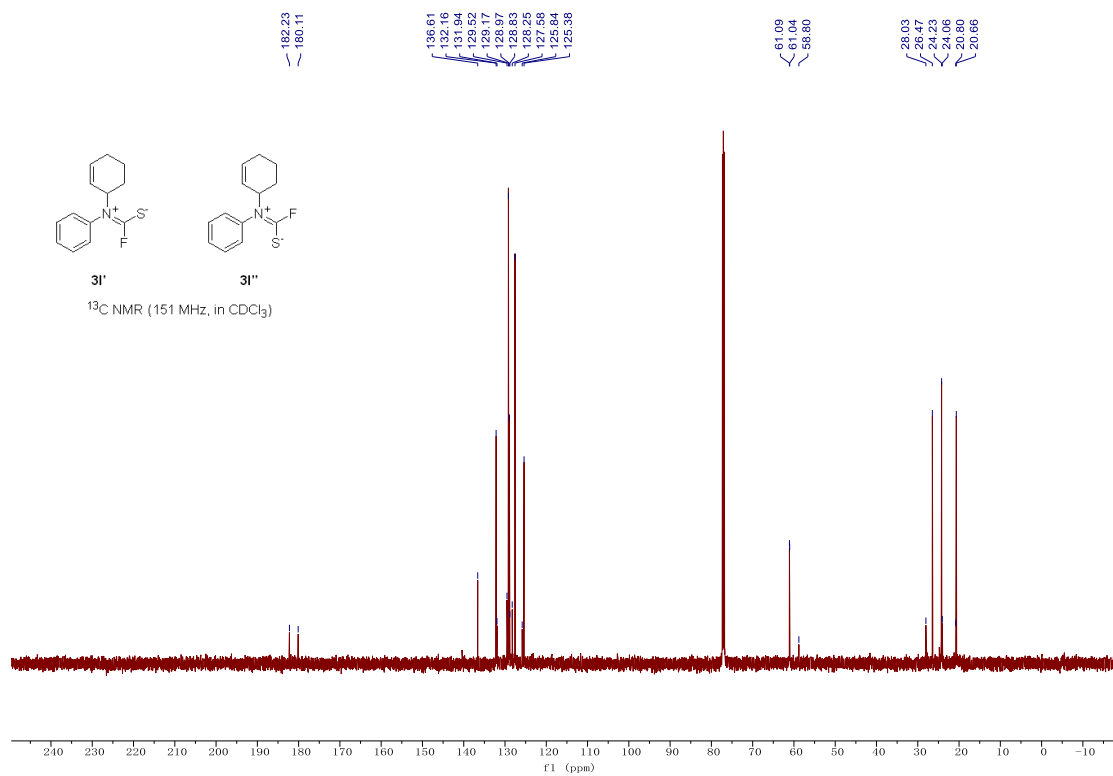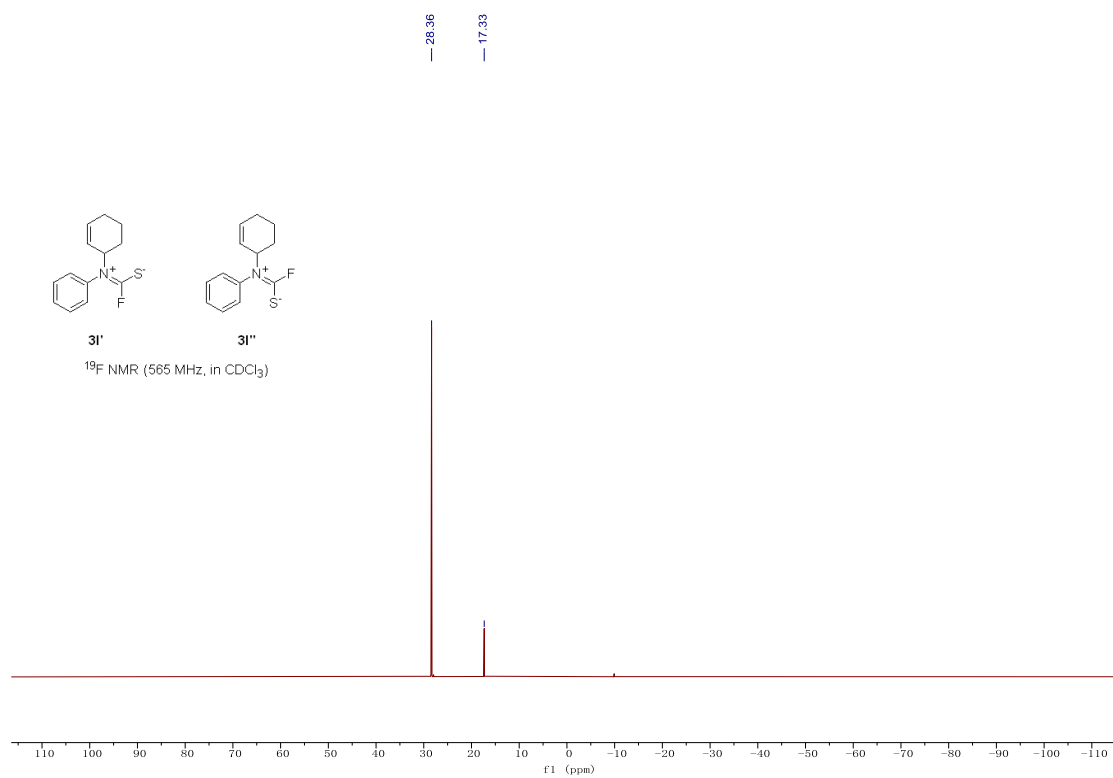

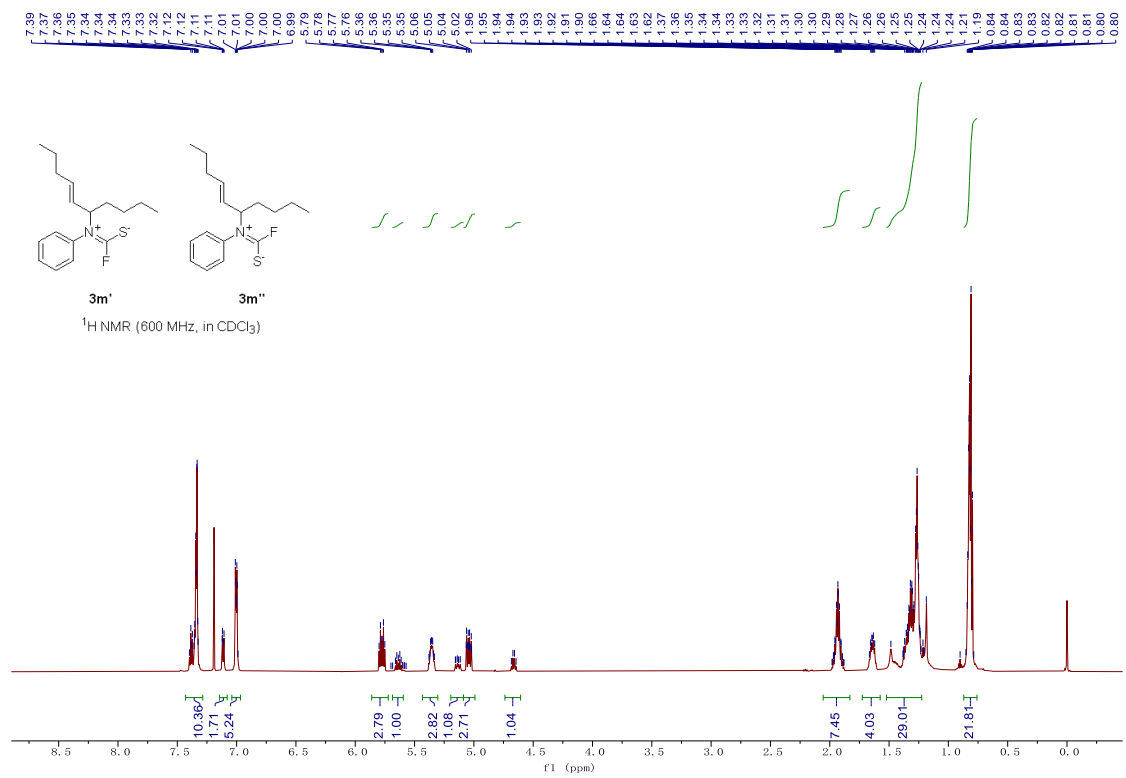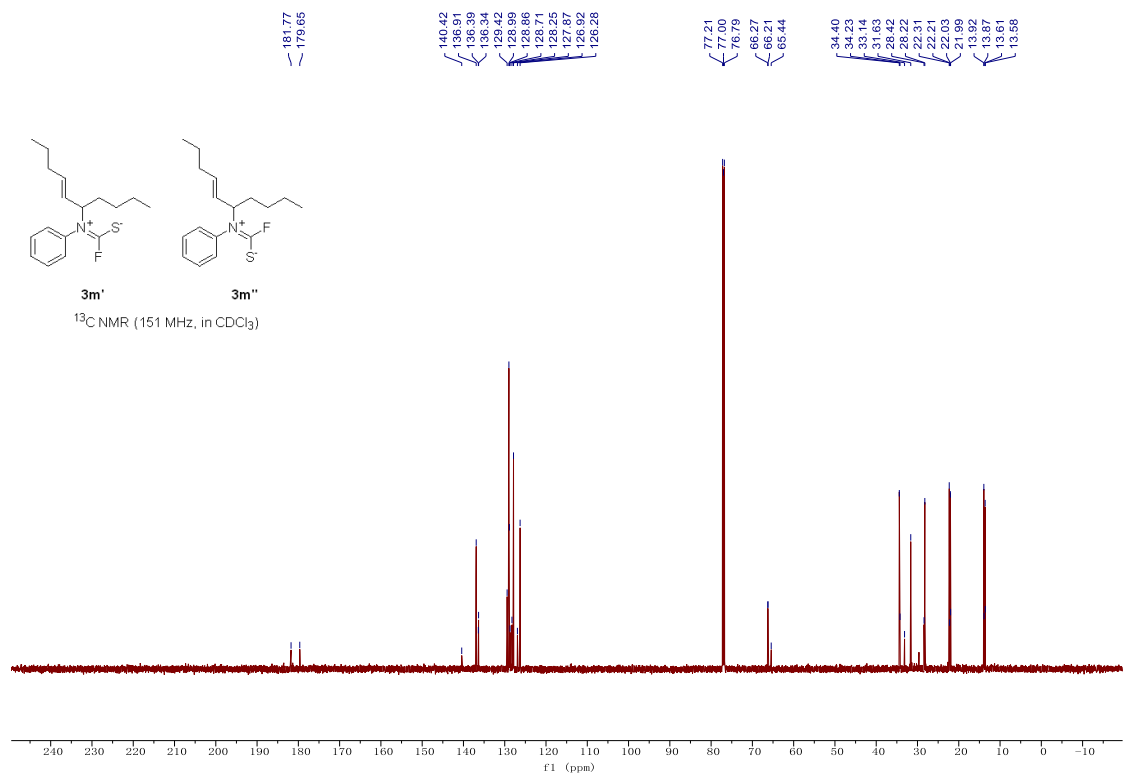

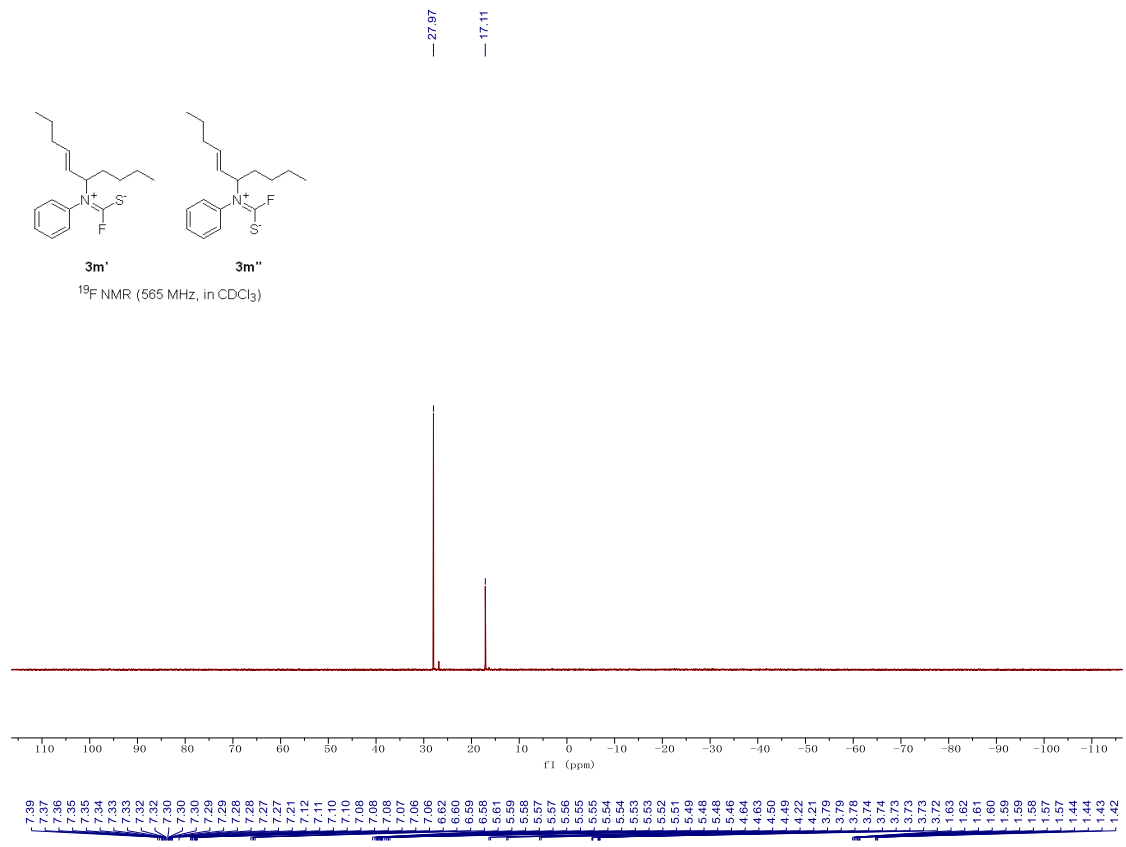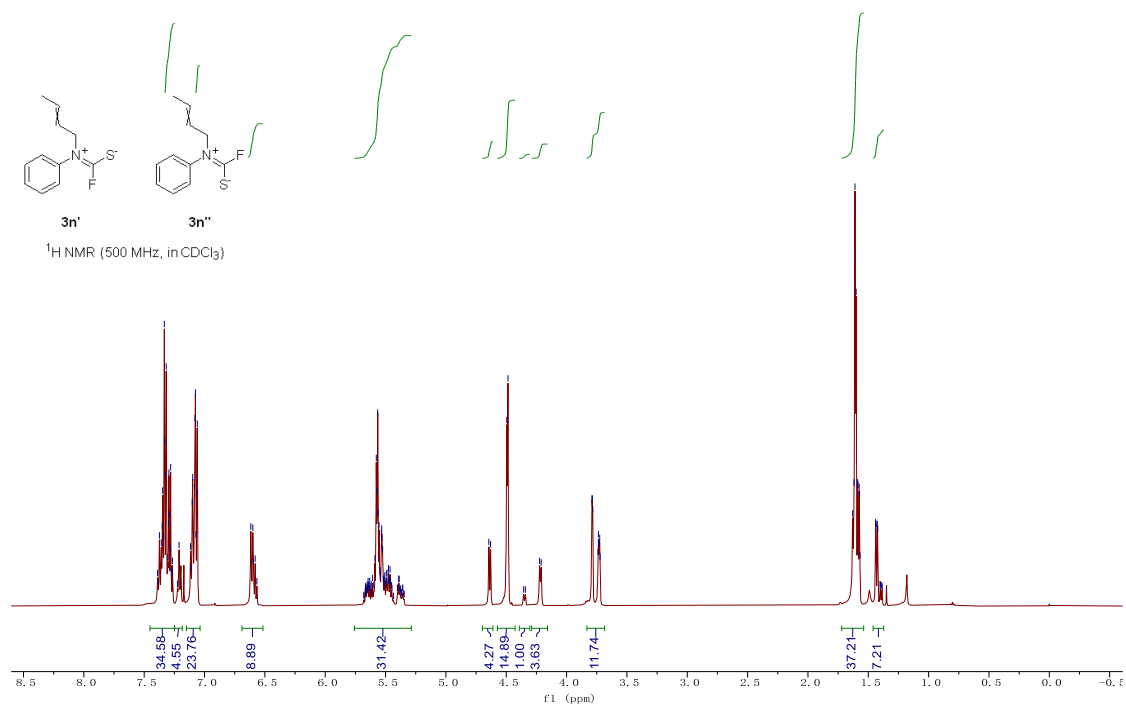

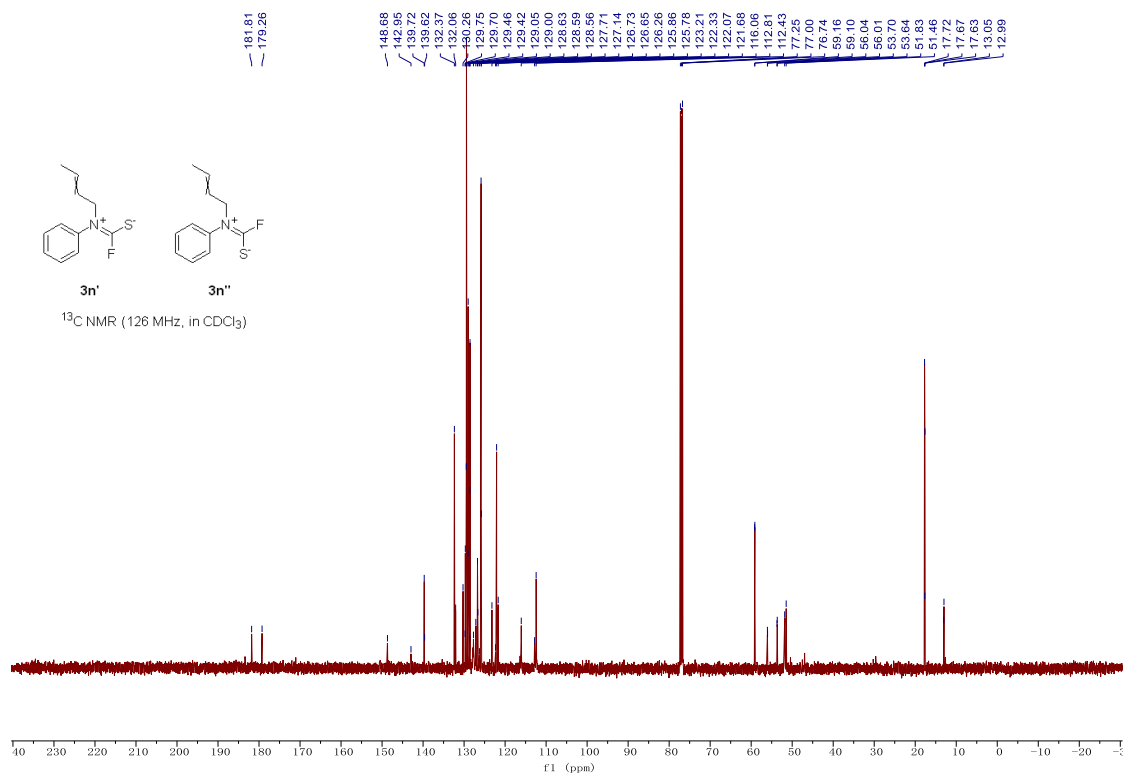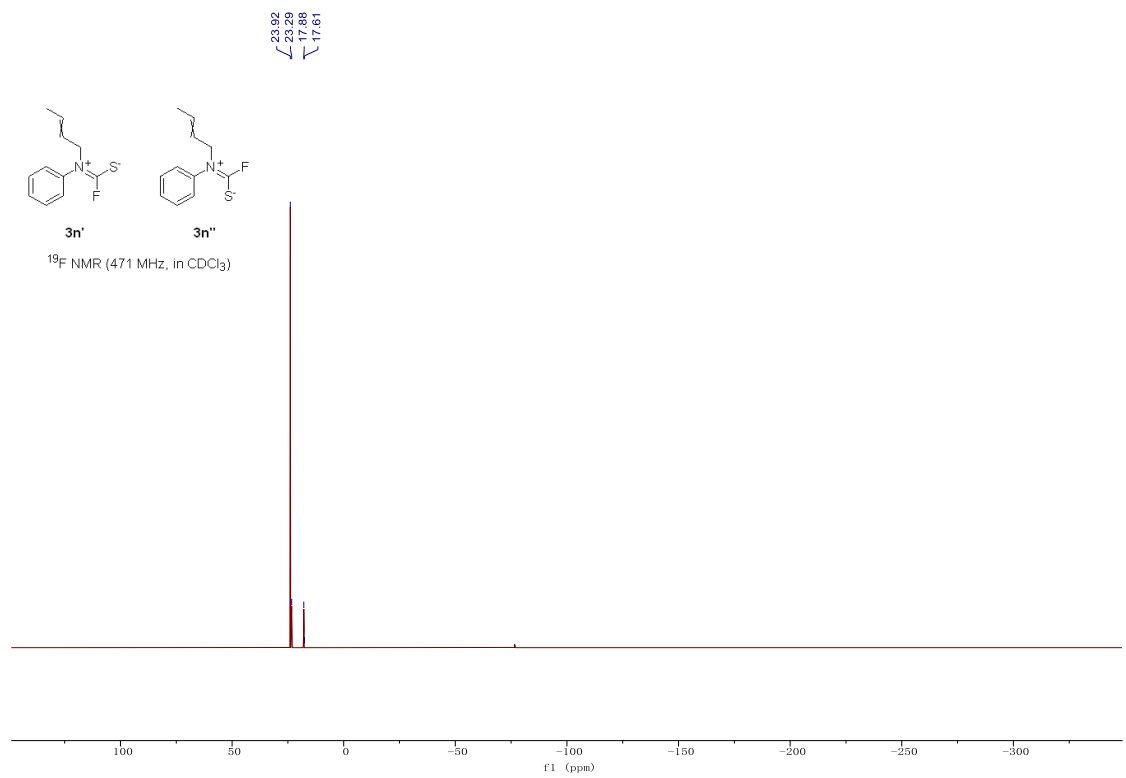



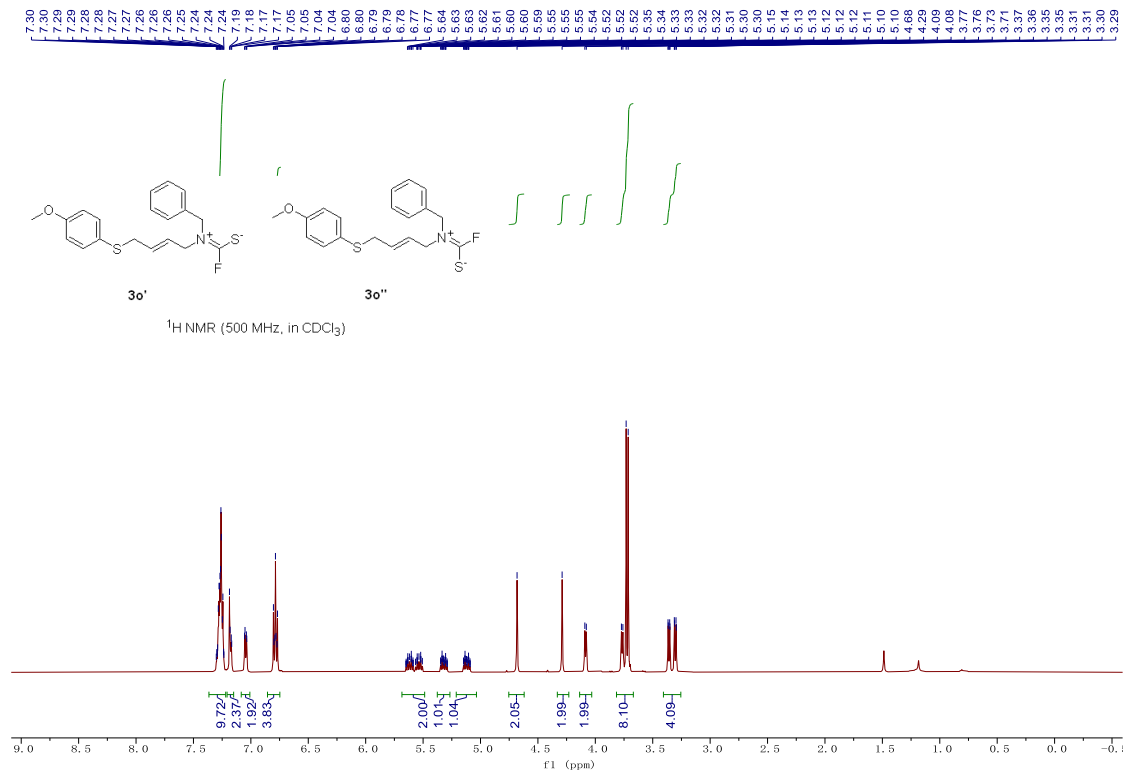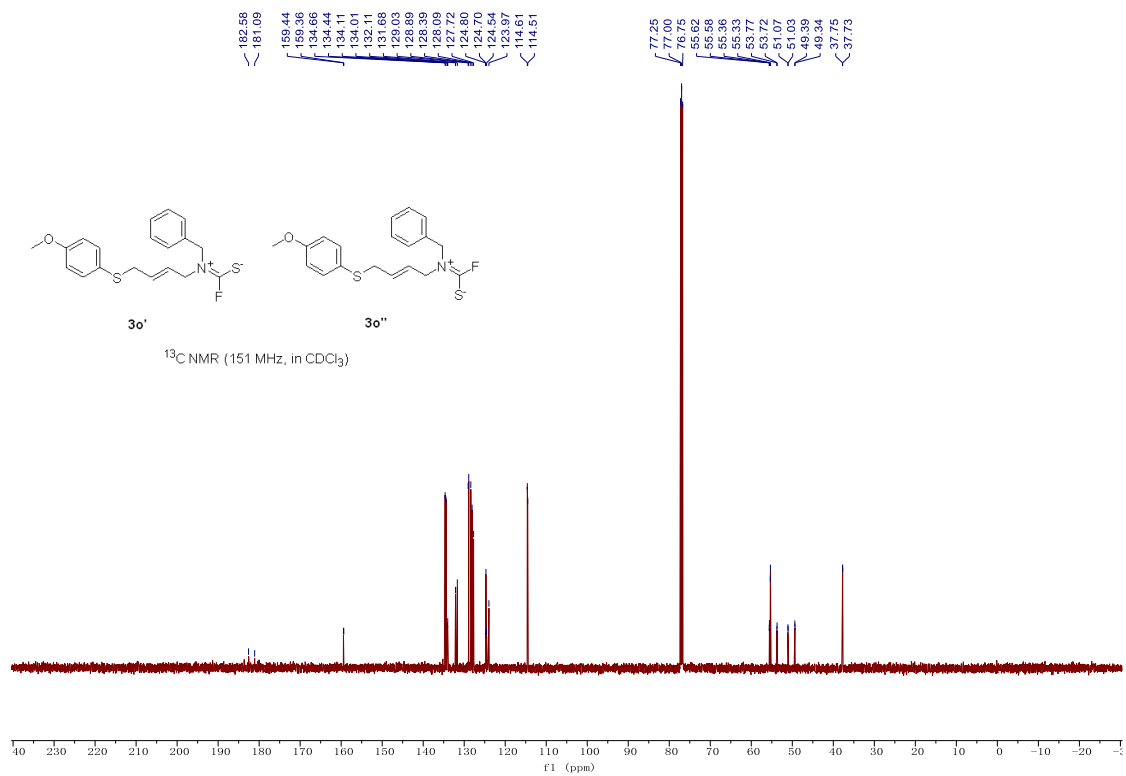

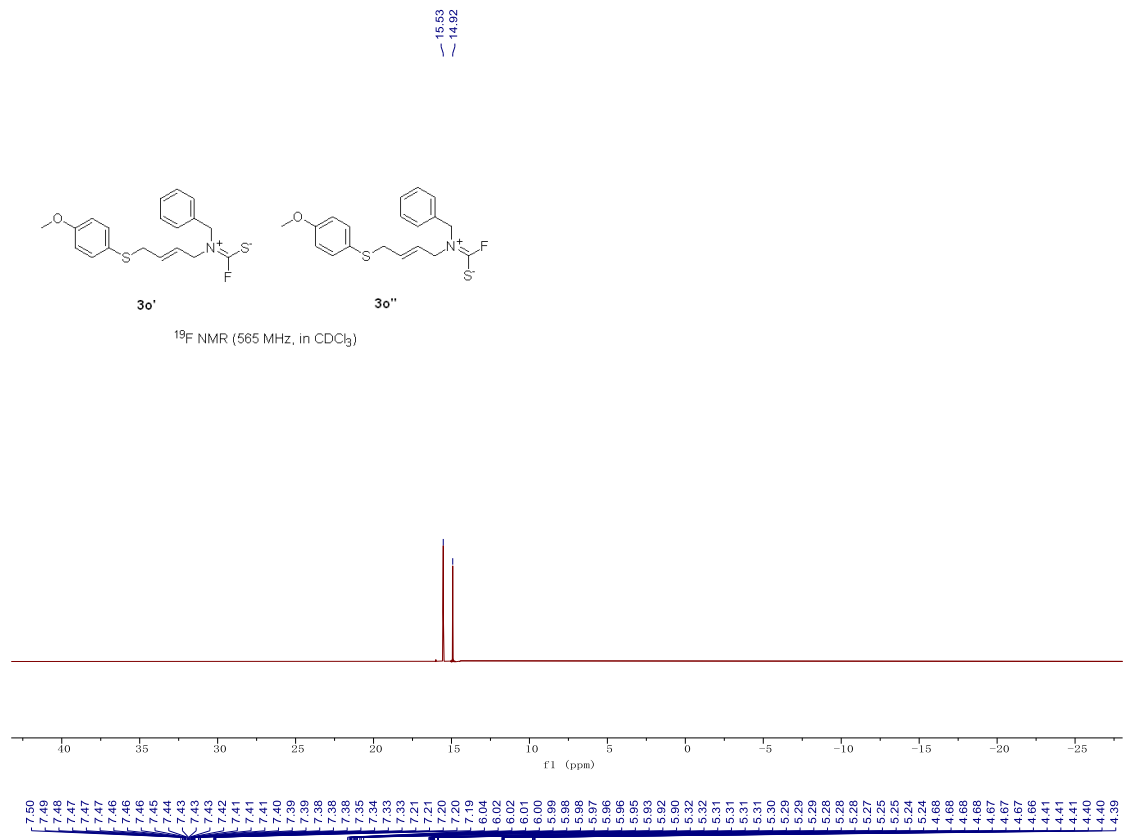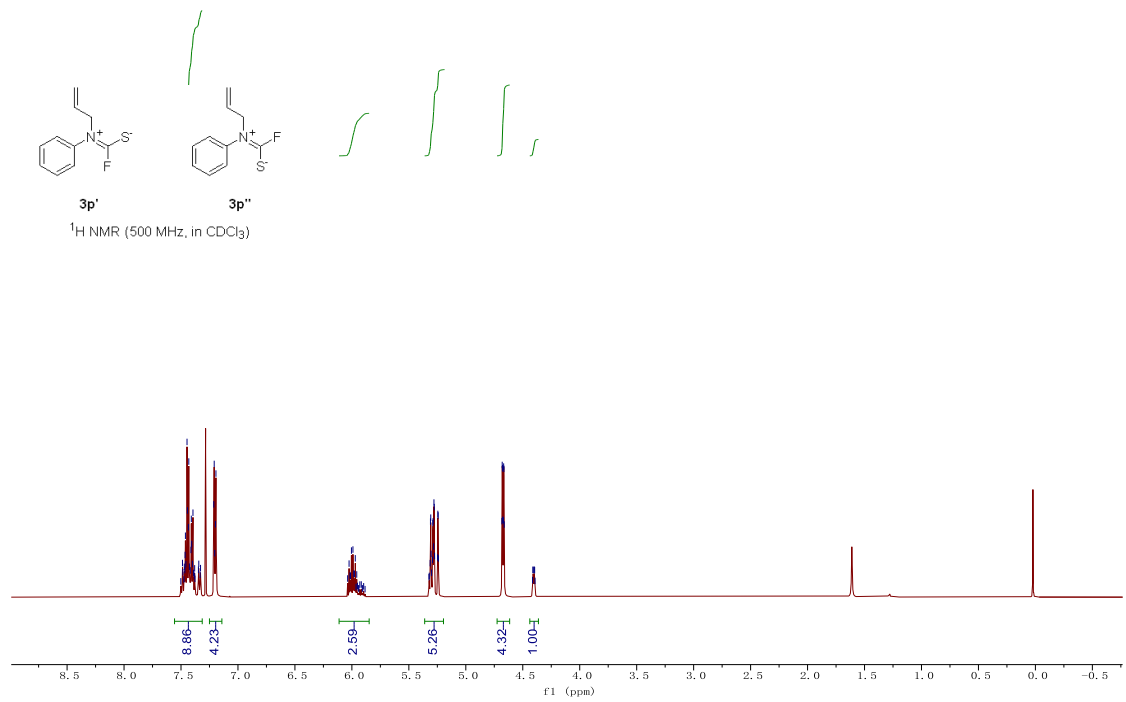

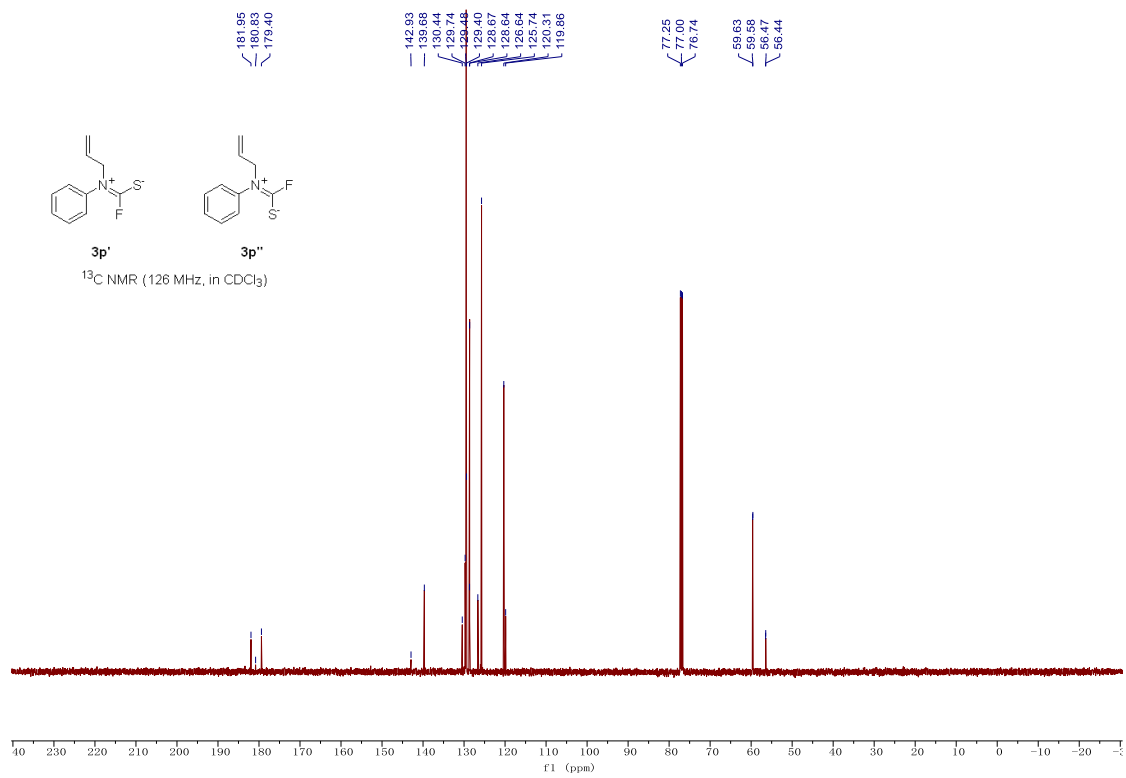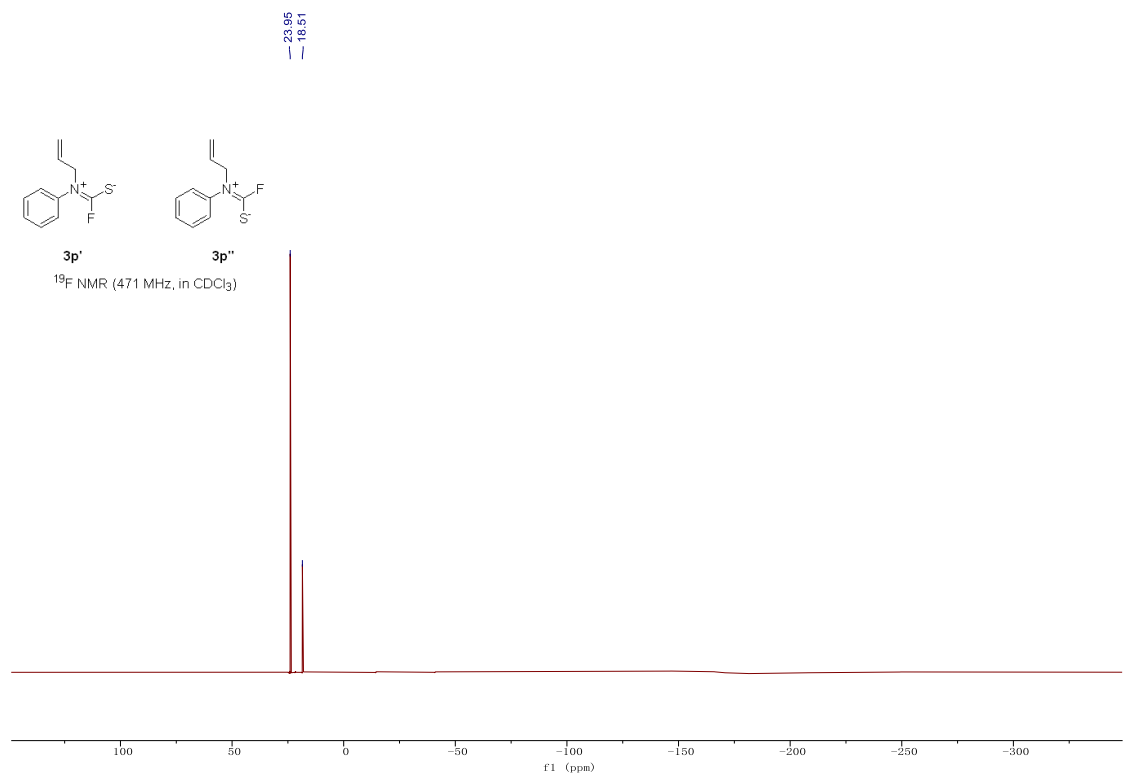

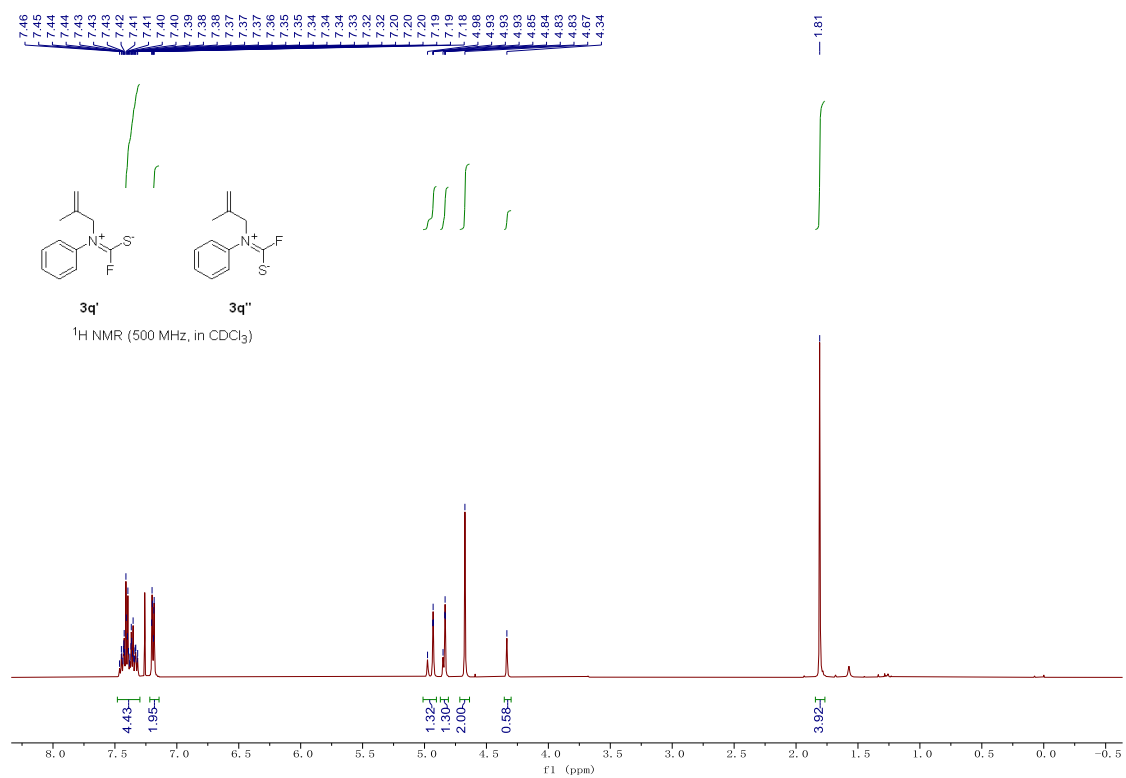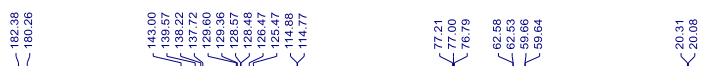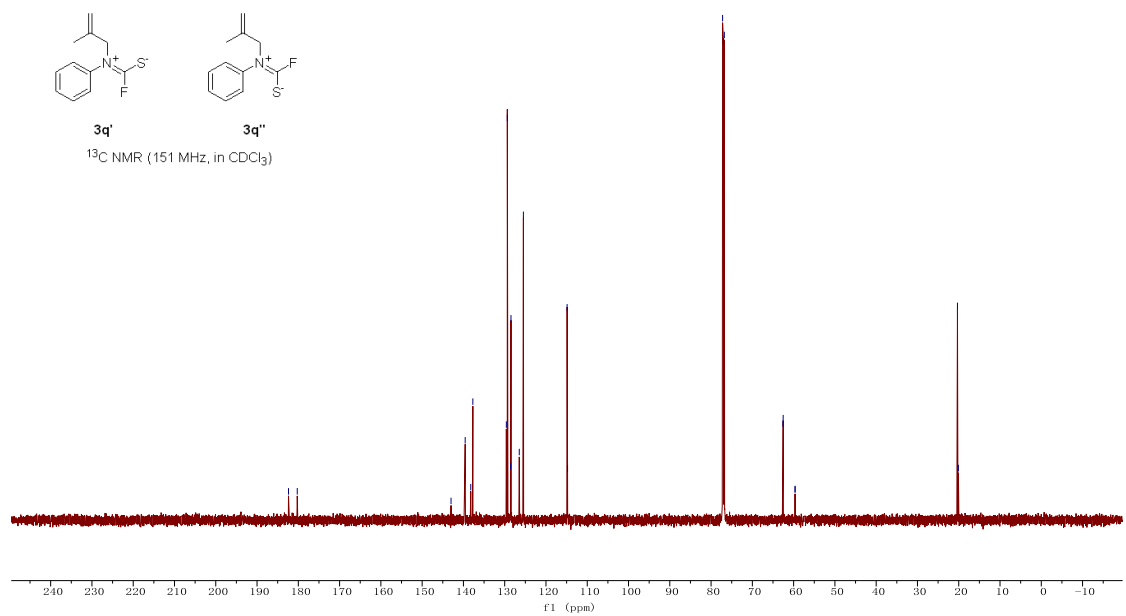

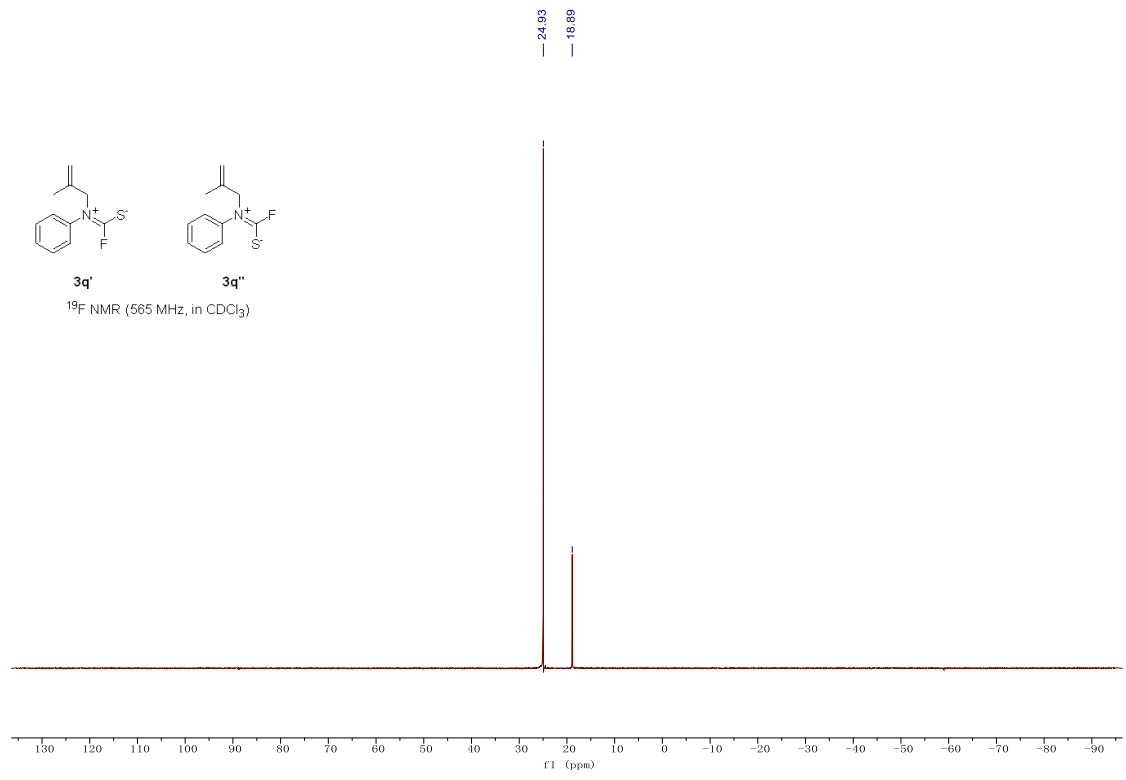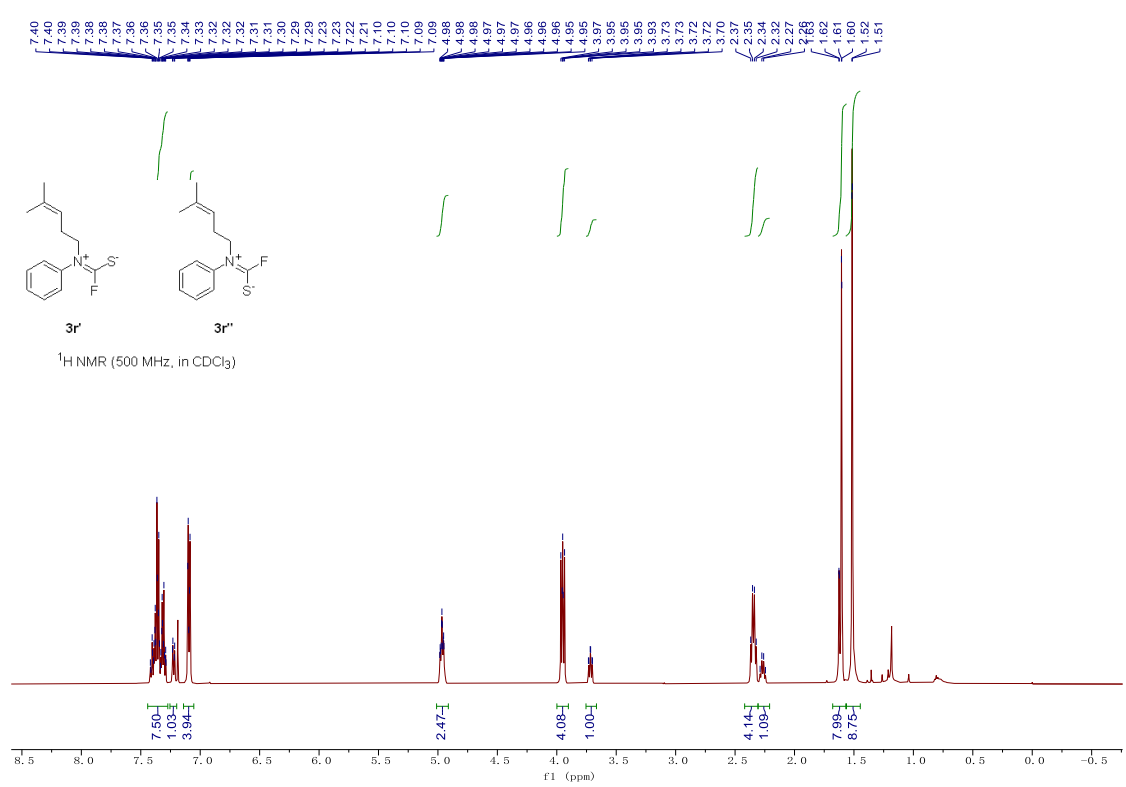

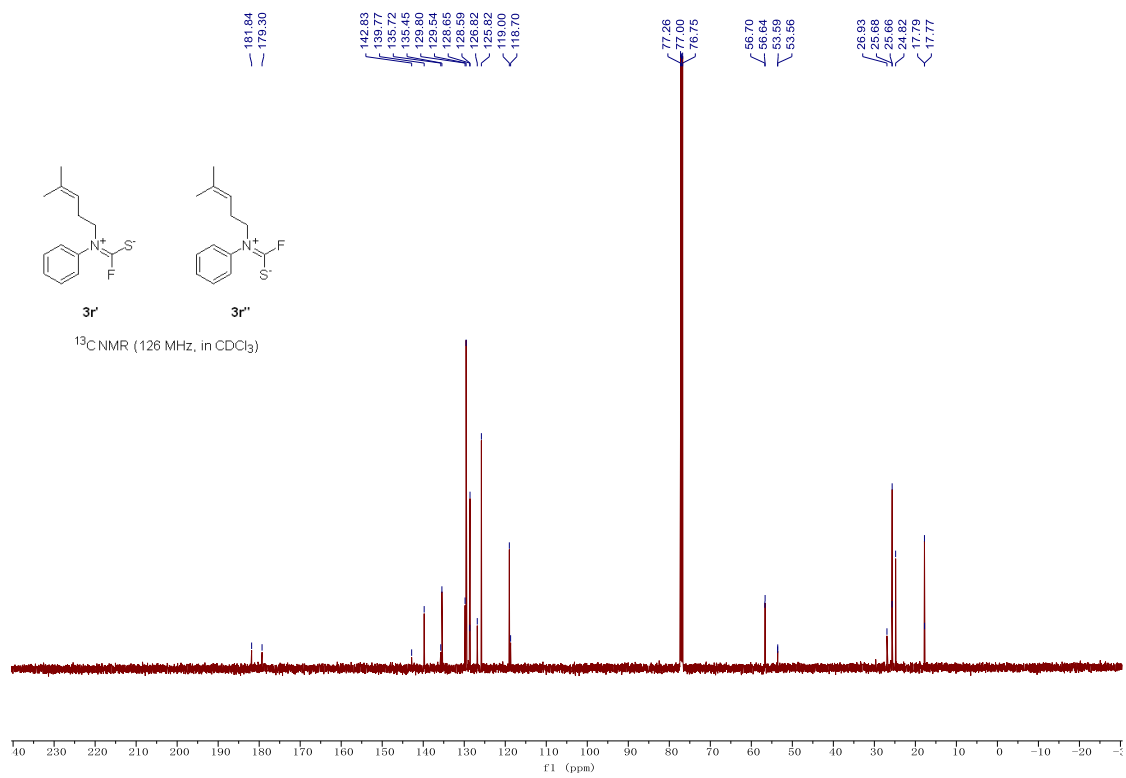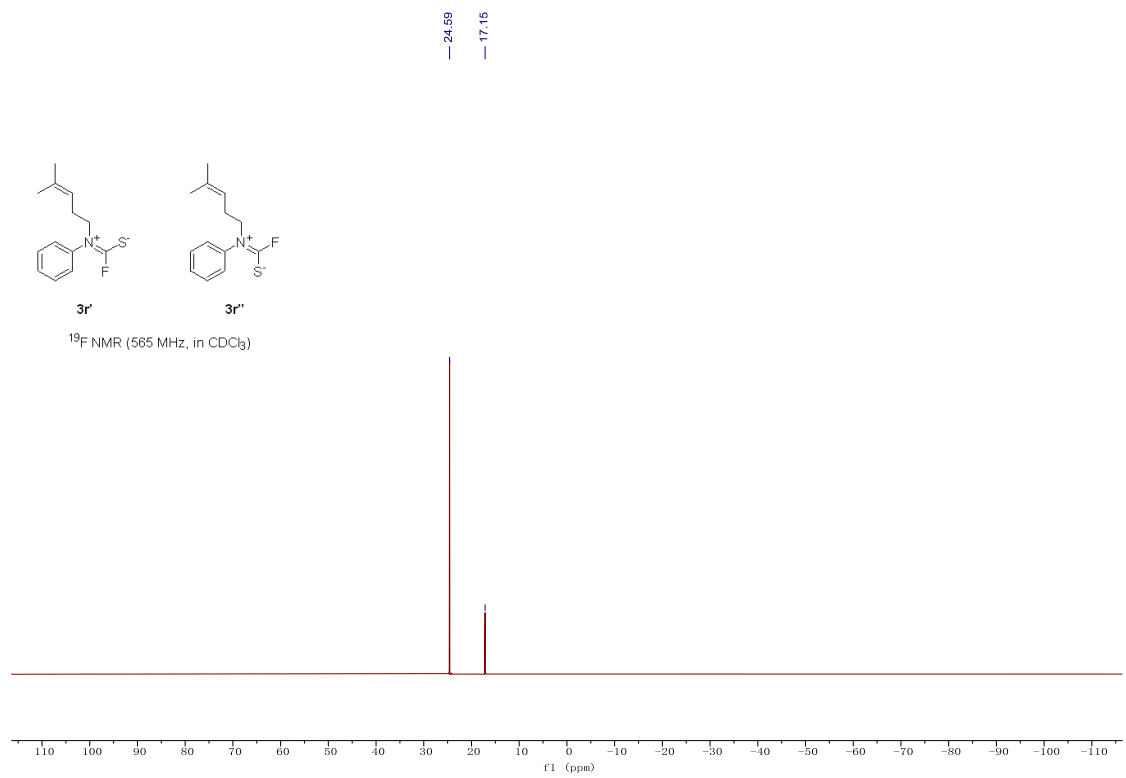

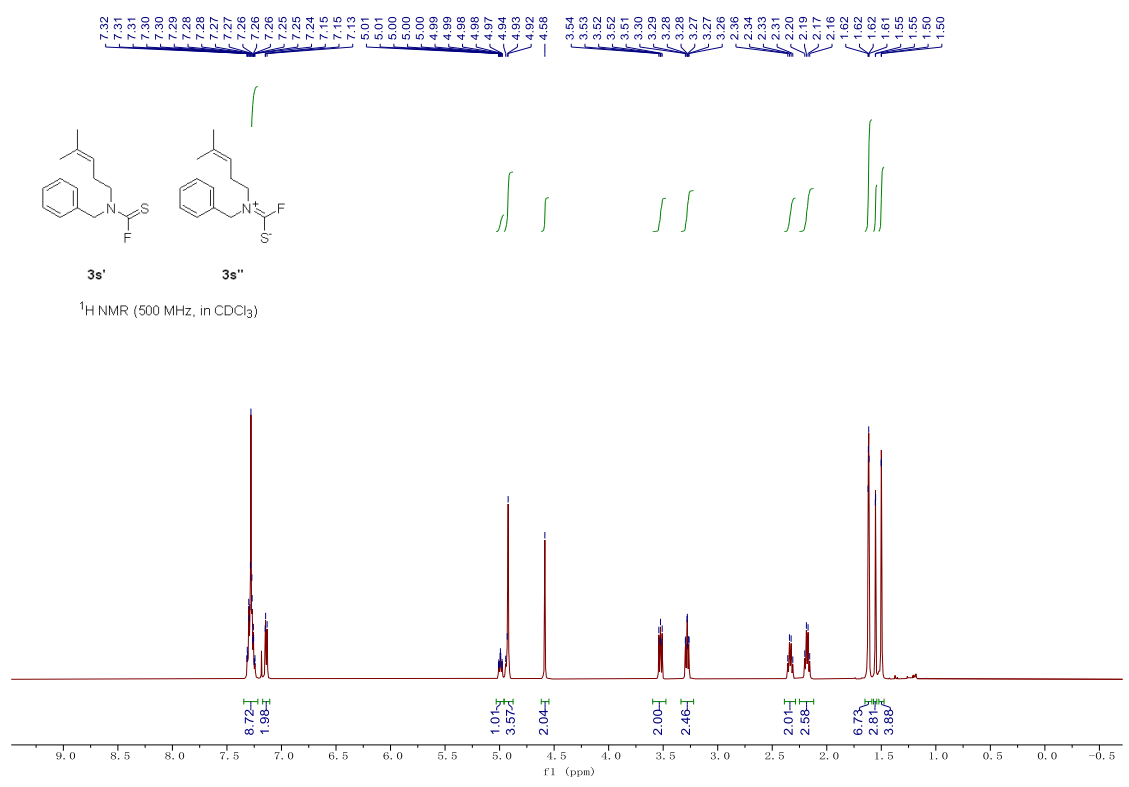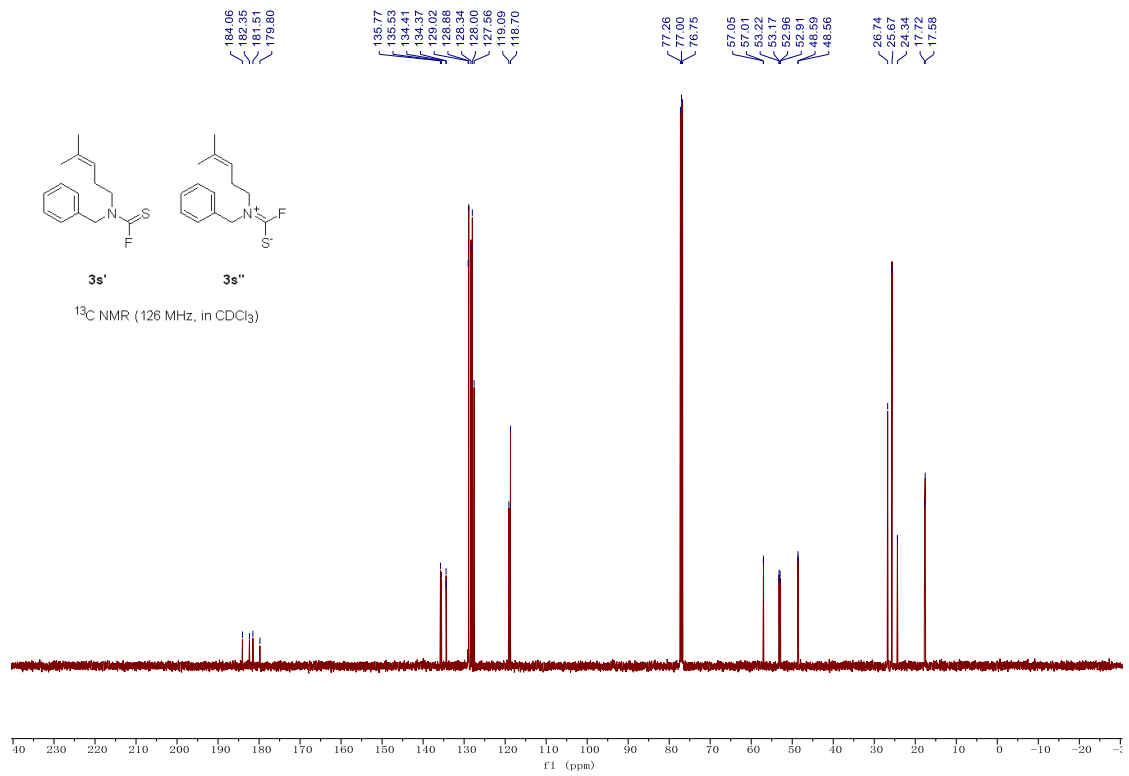

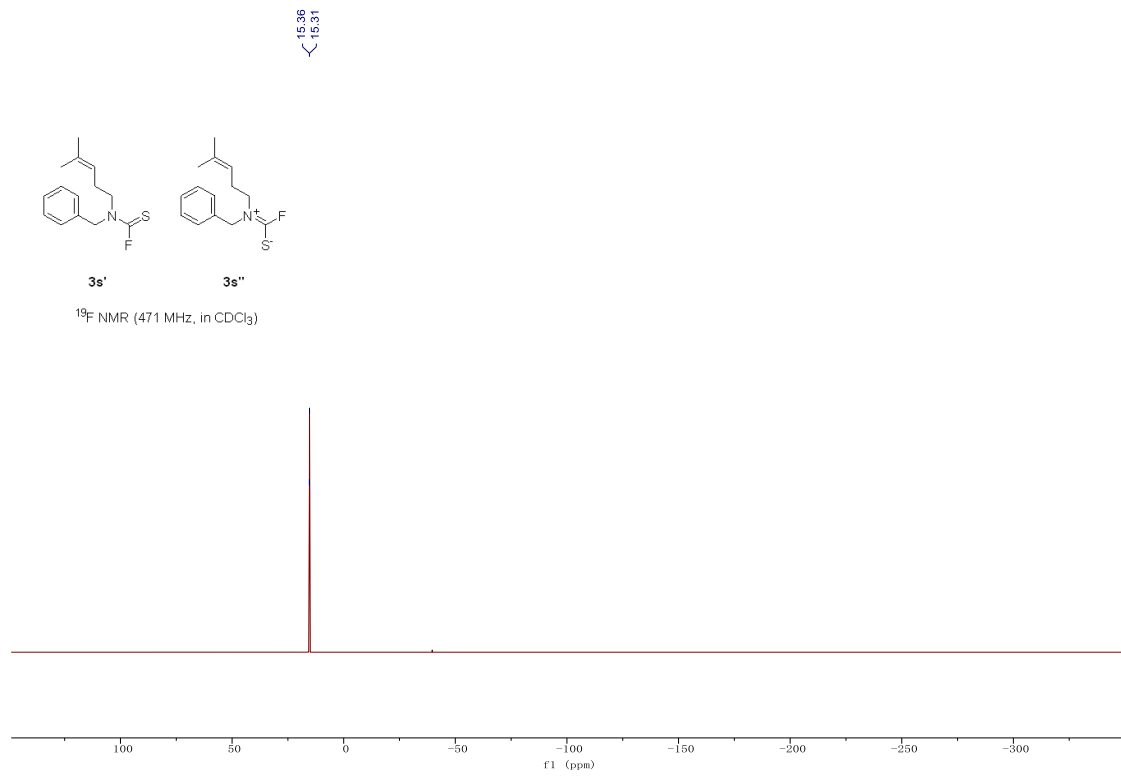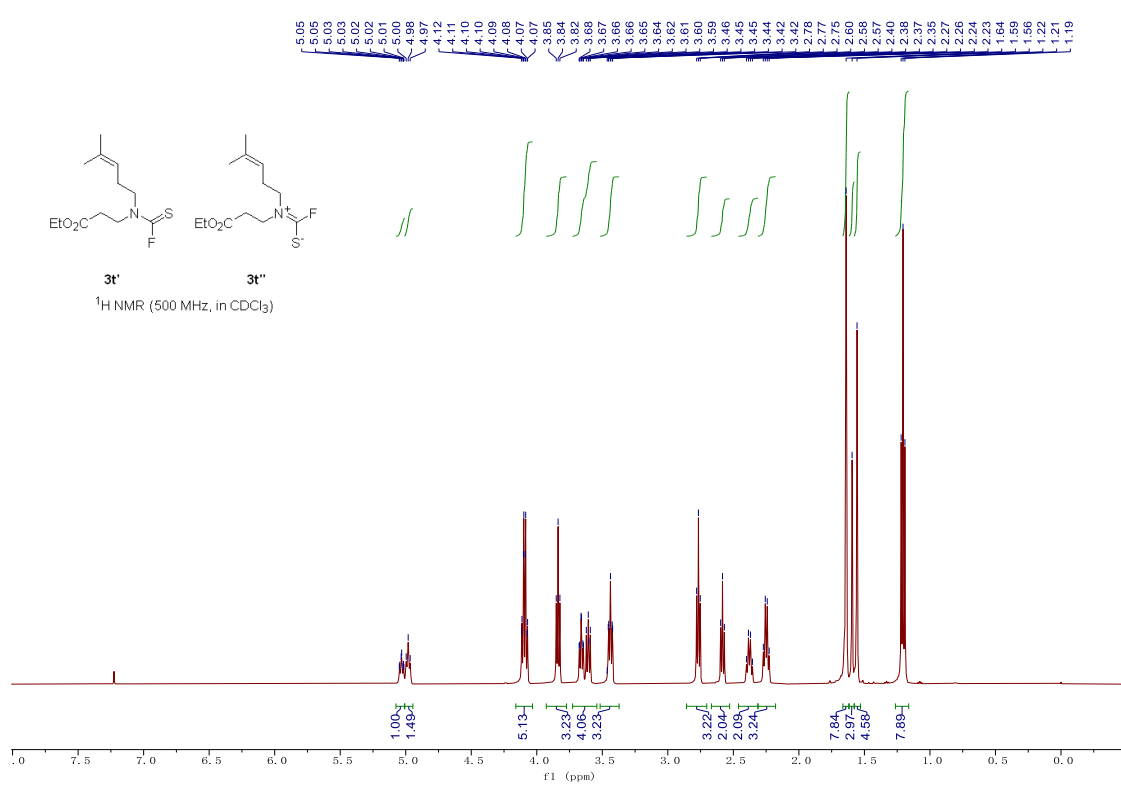



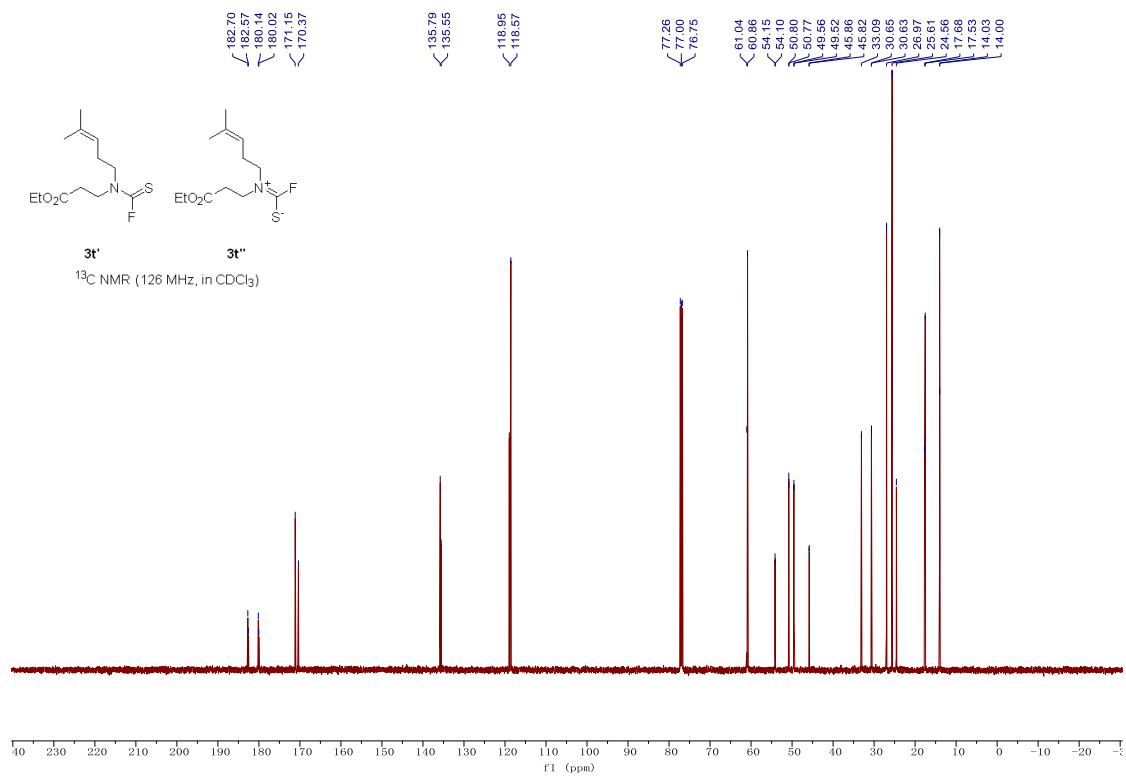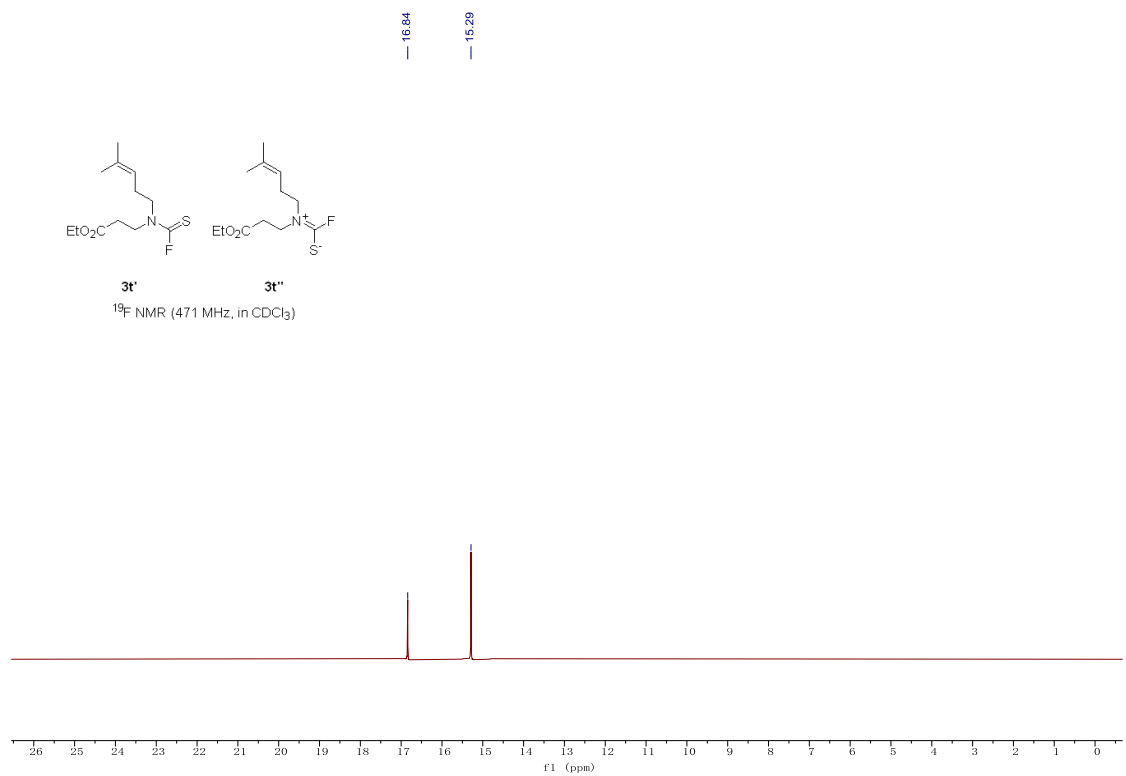

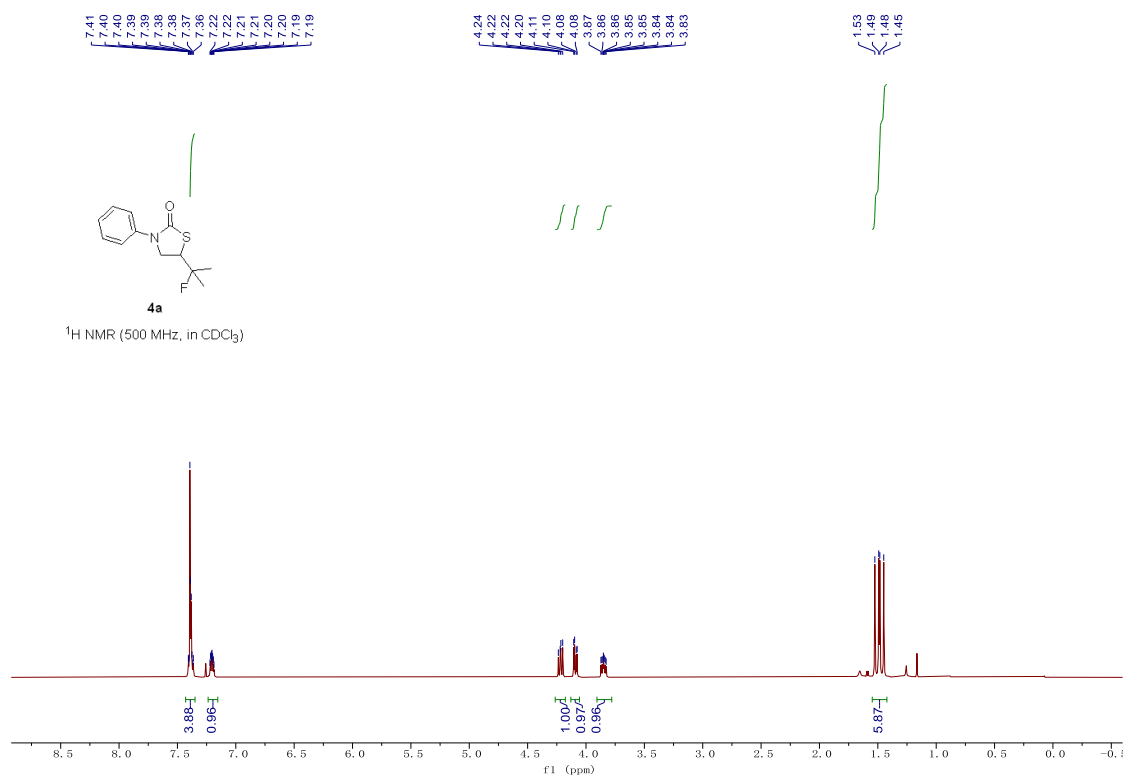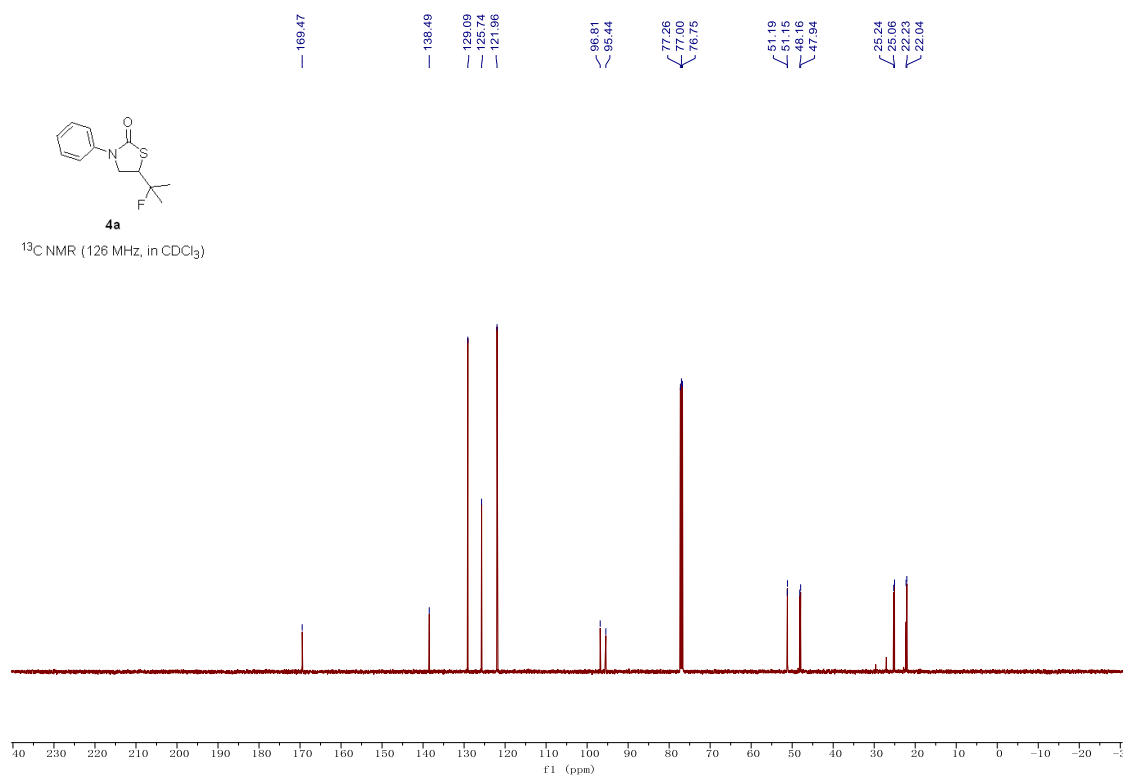

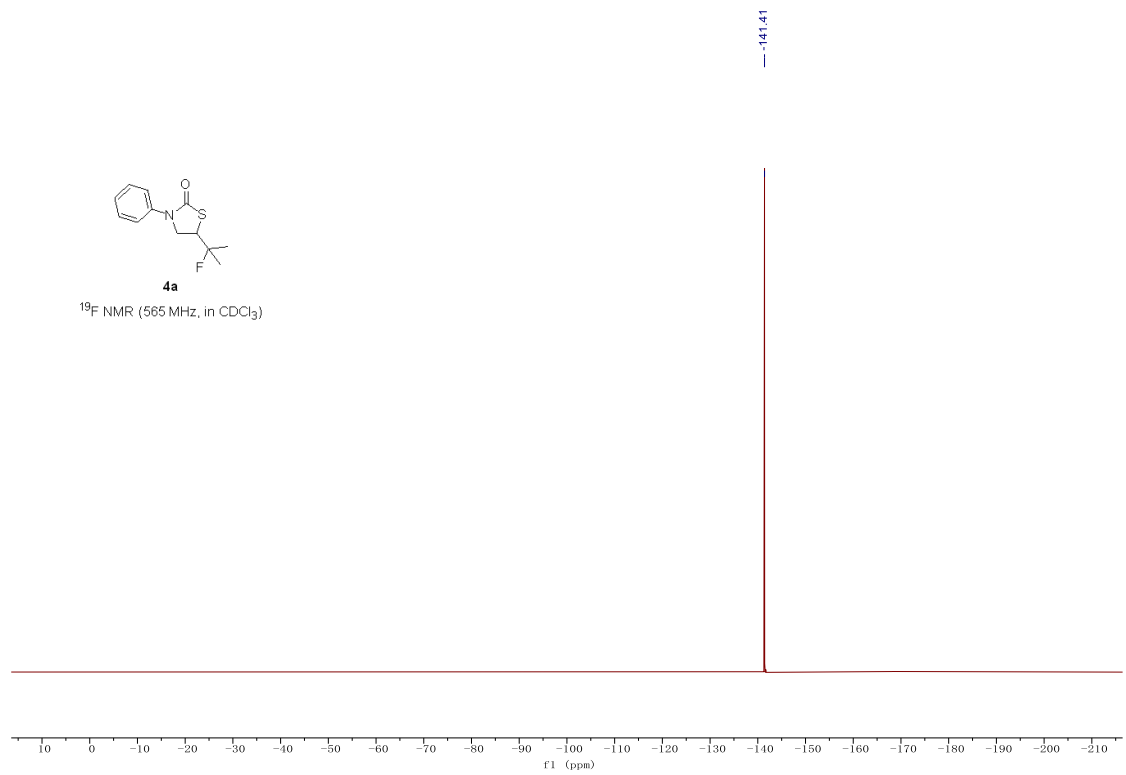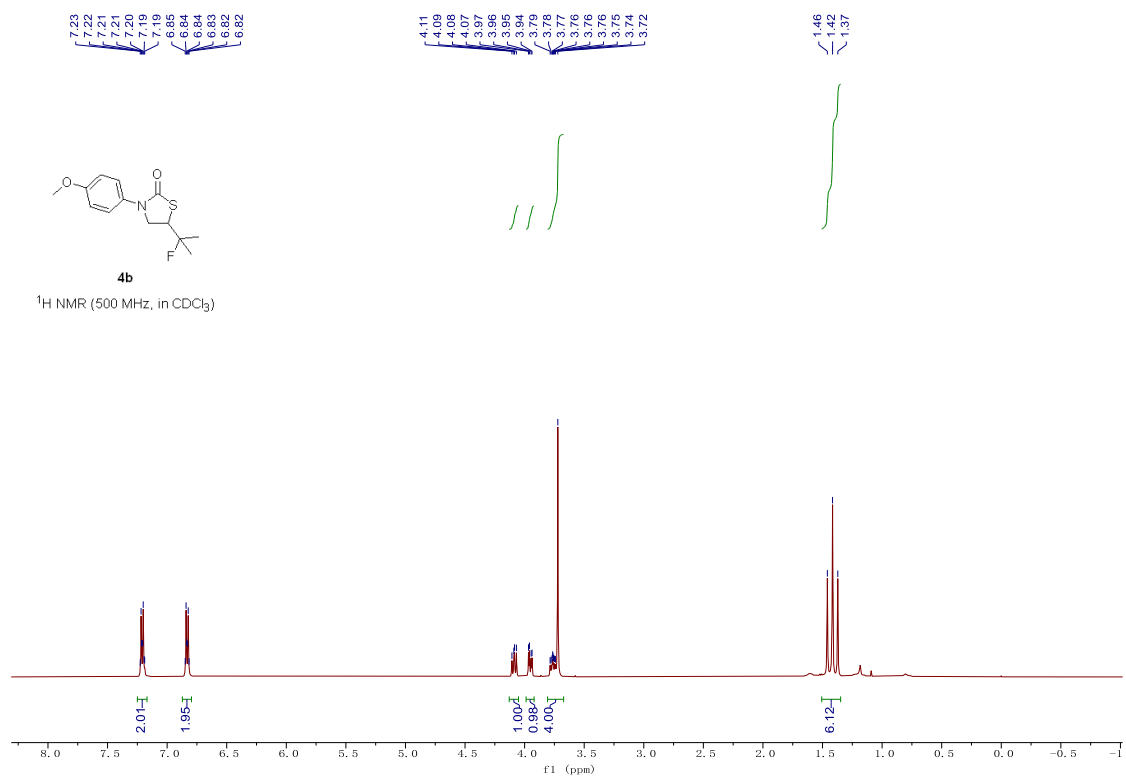

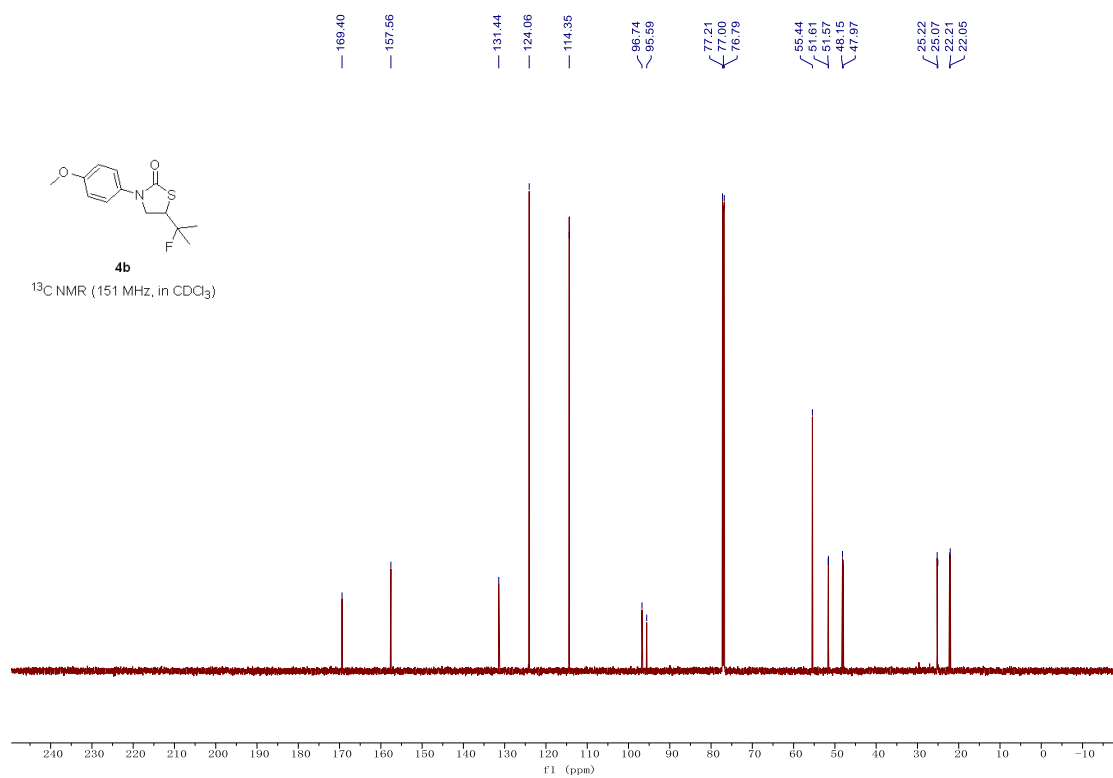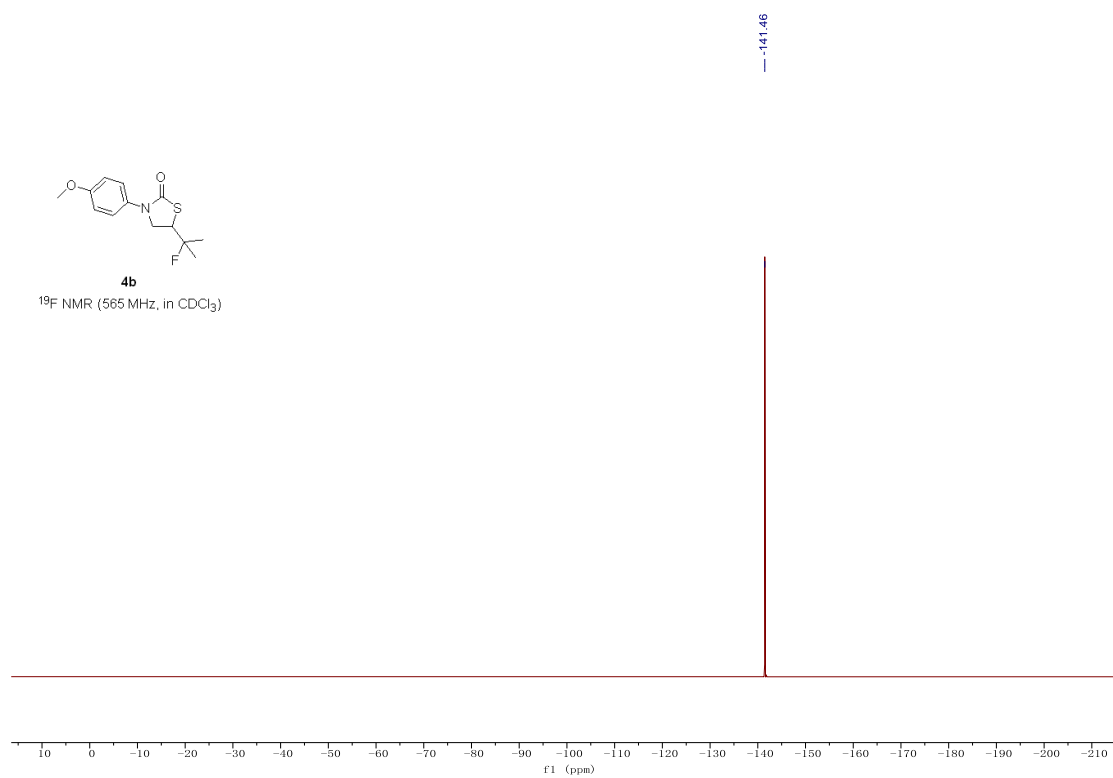

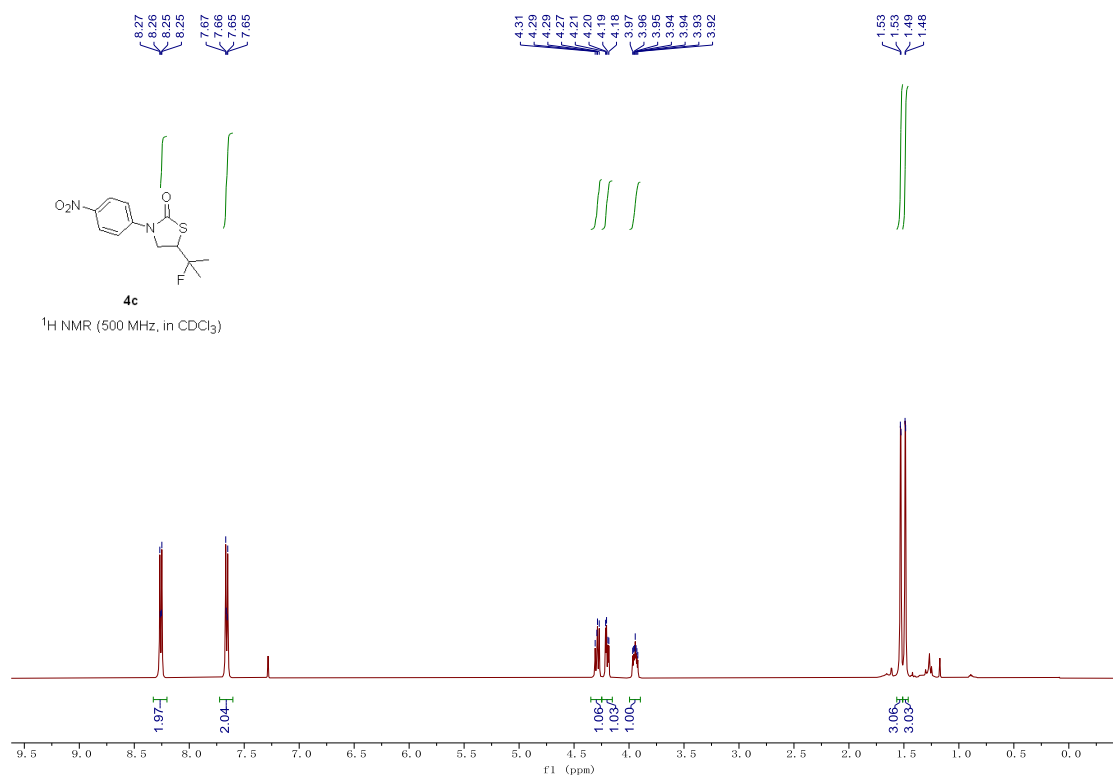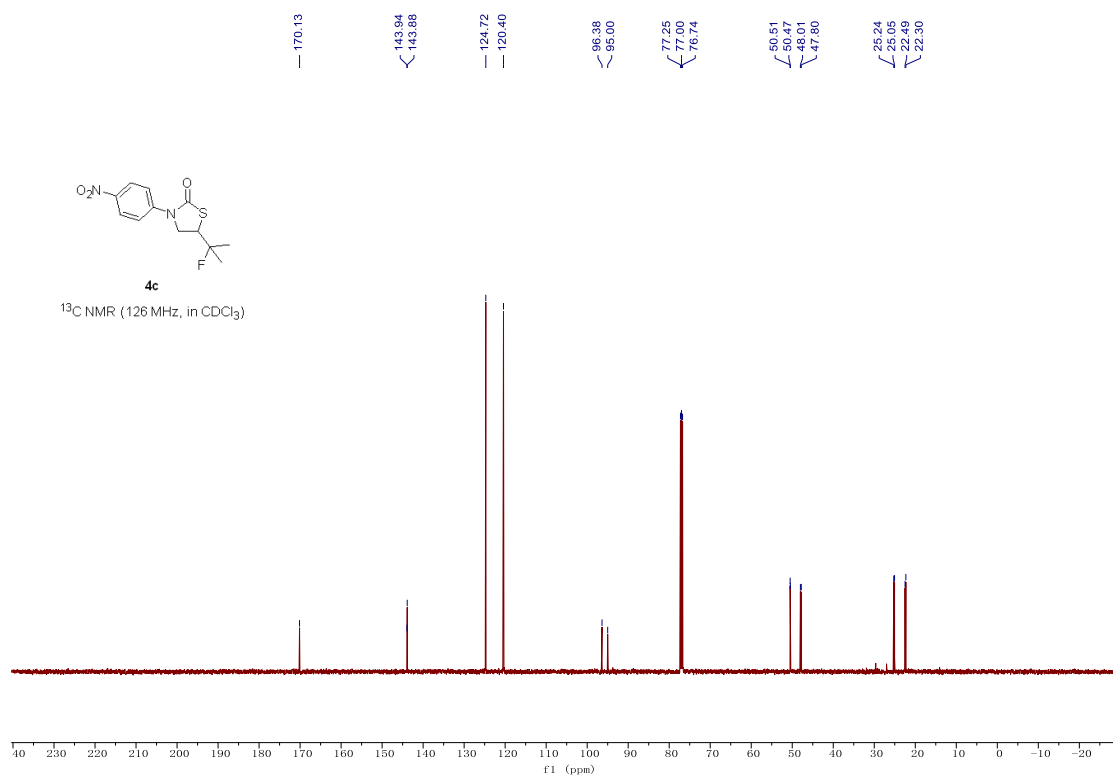

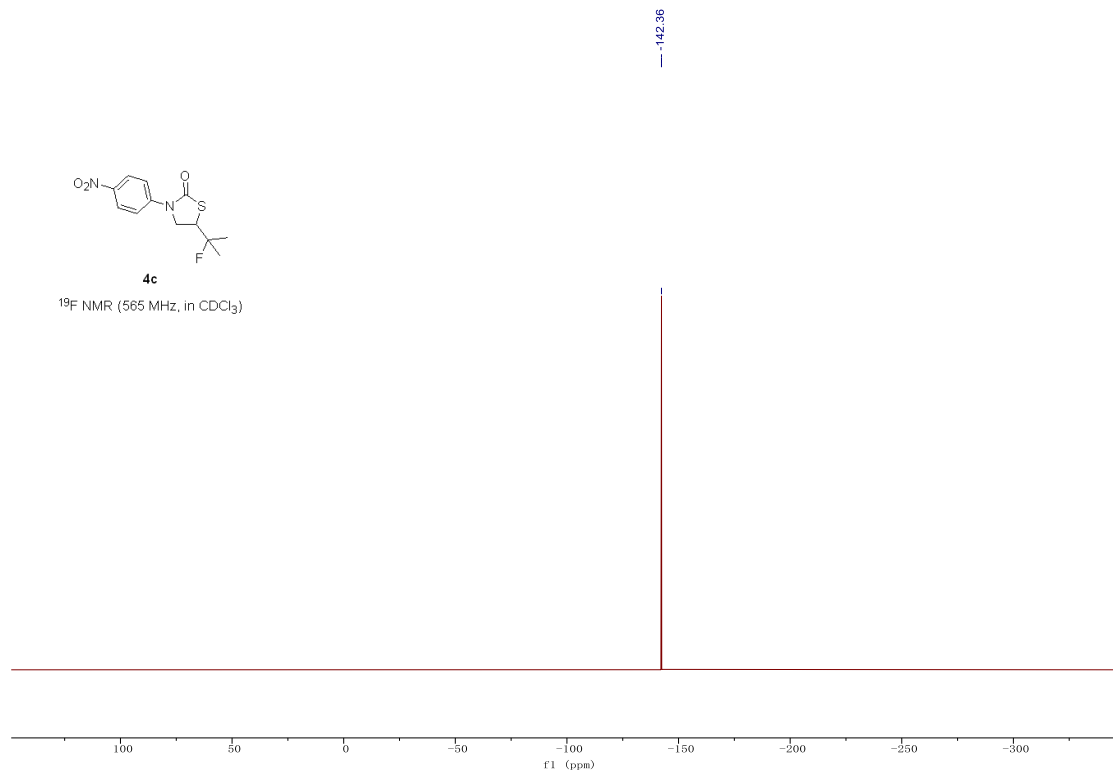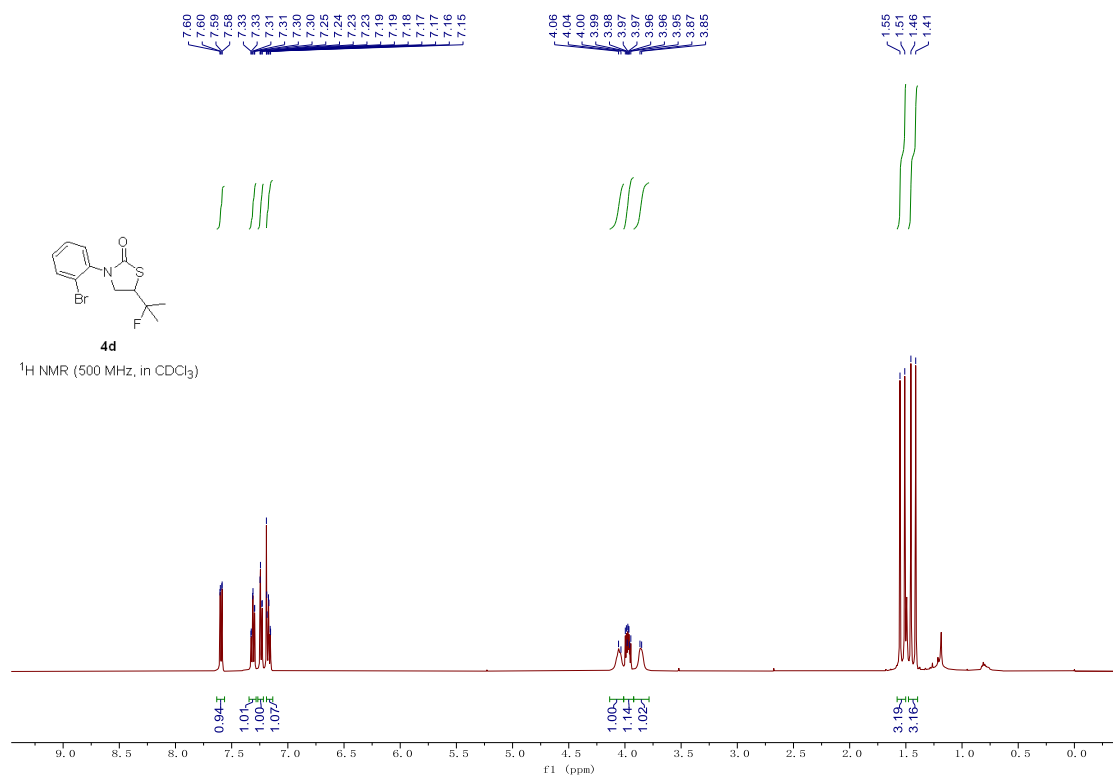

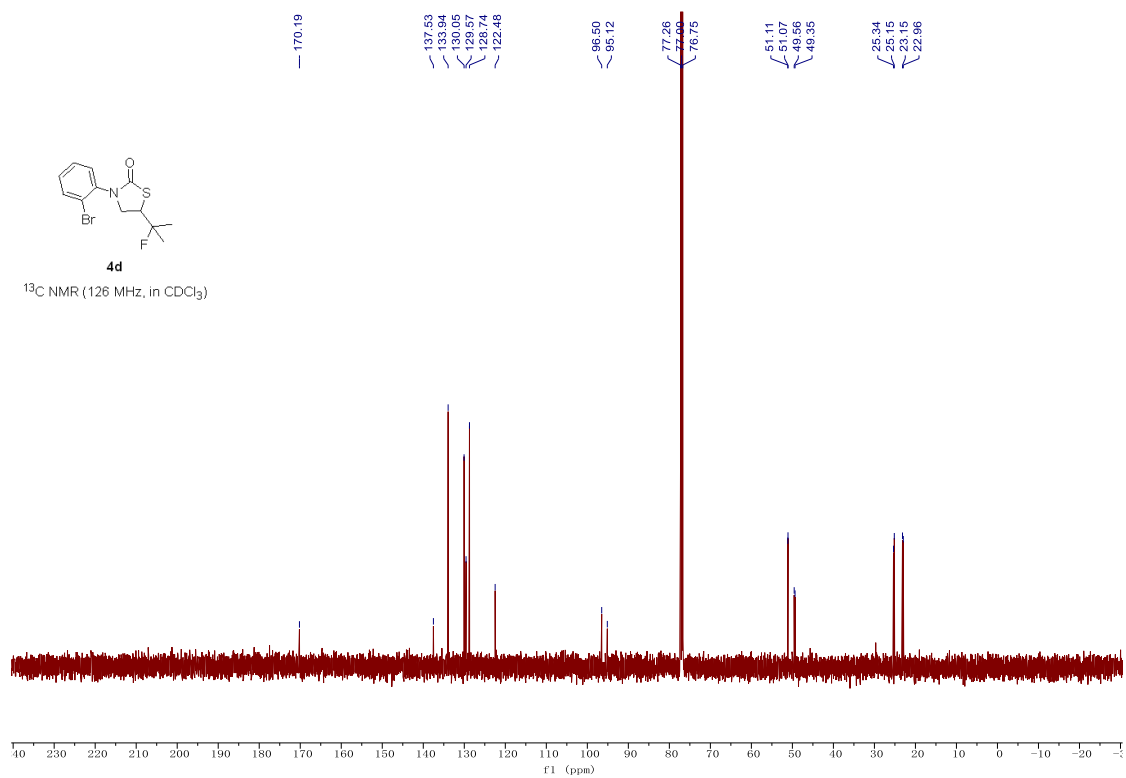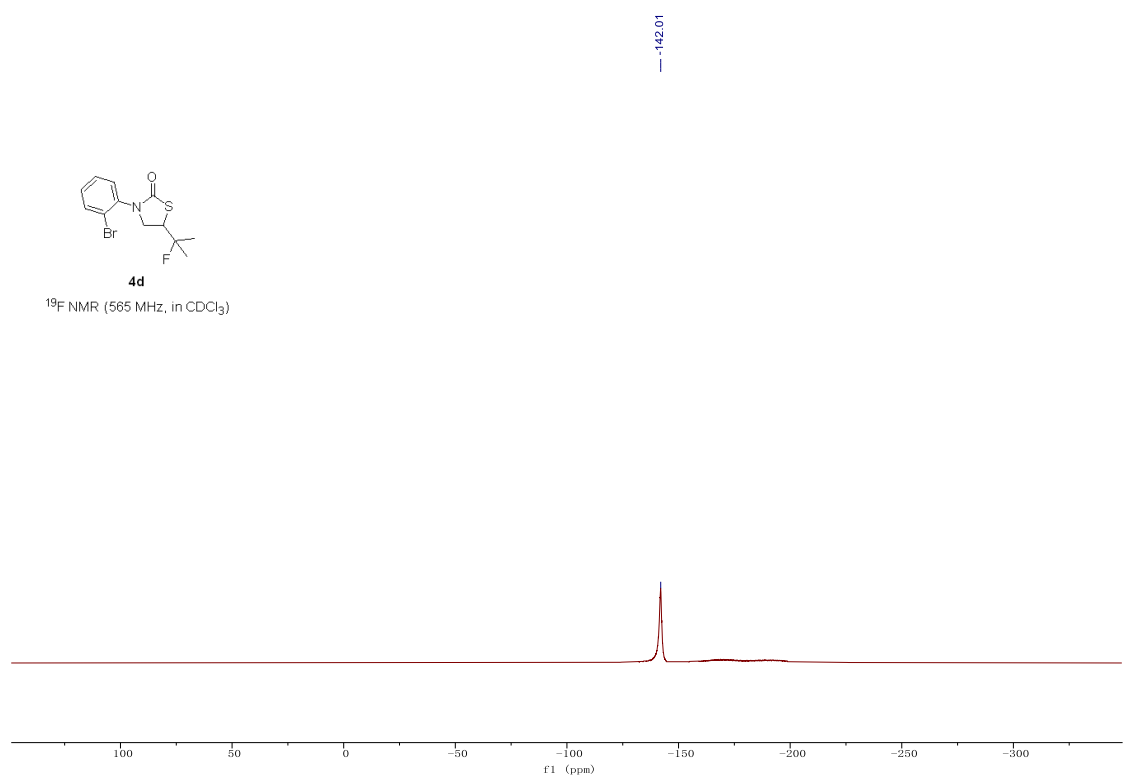

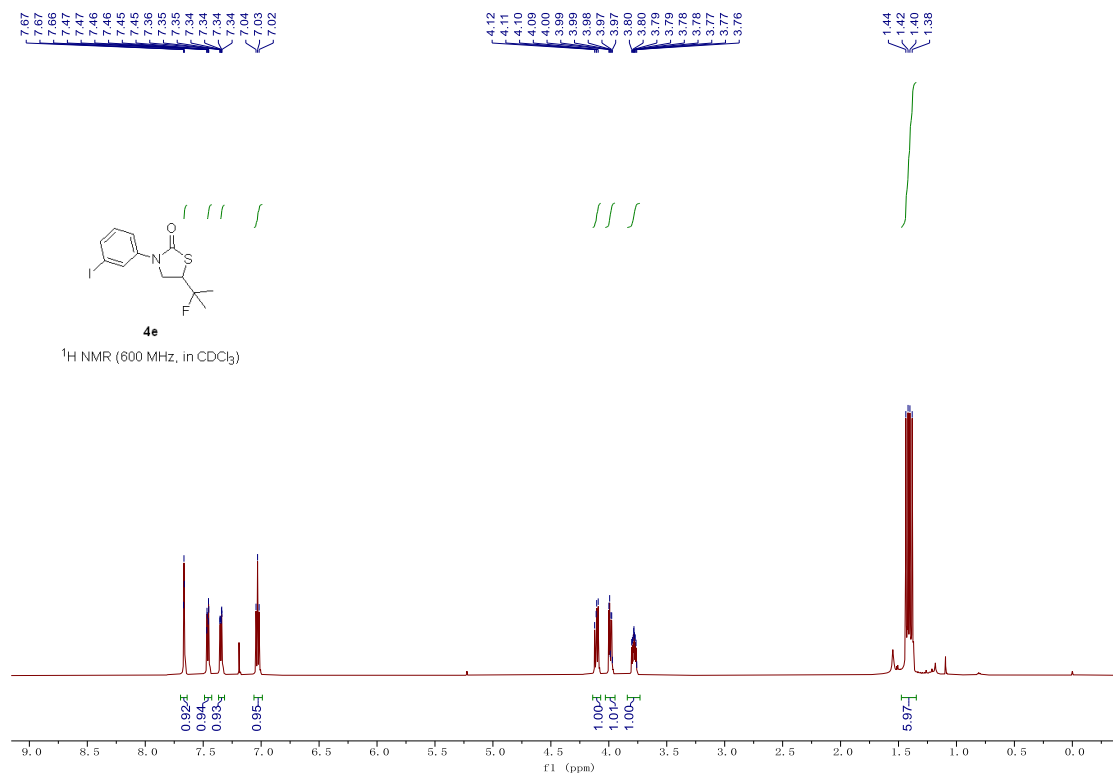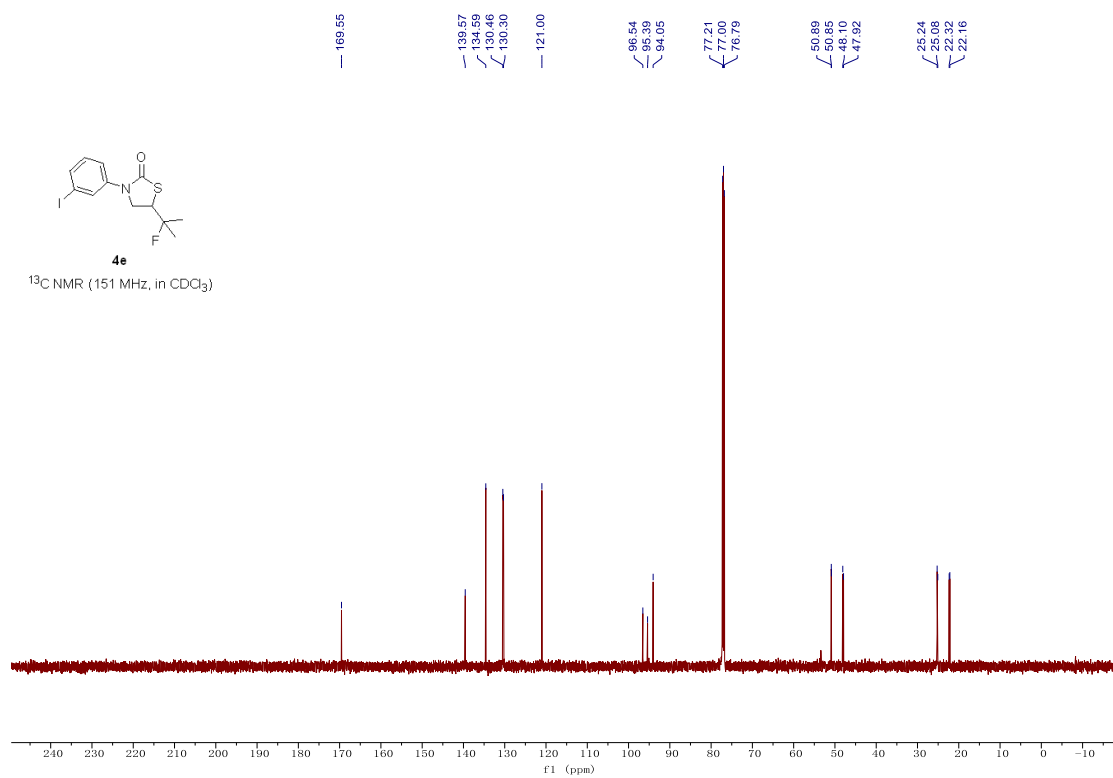



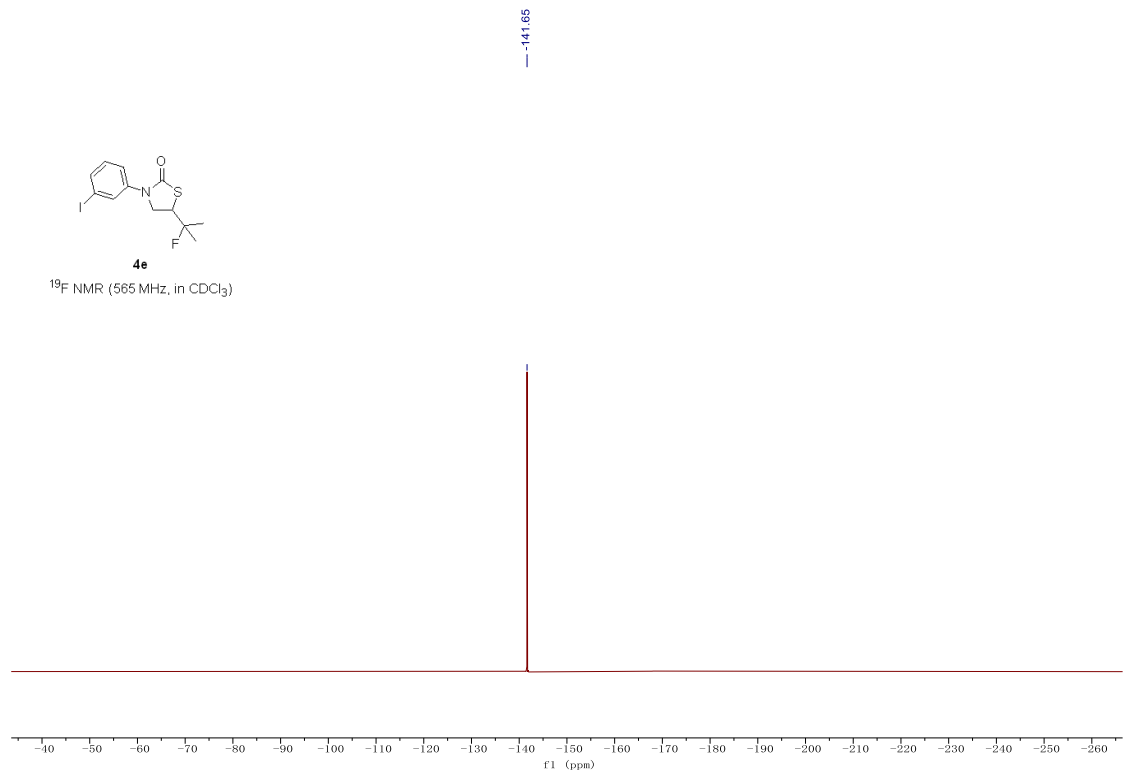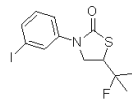

**4e**

<sup>19</sup>F NMR (565 MHz, in CDCl<sub>3</sub>)

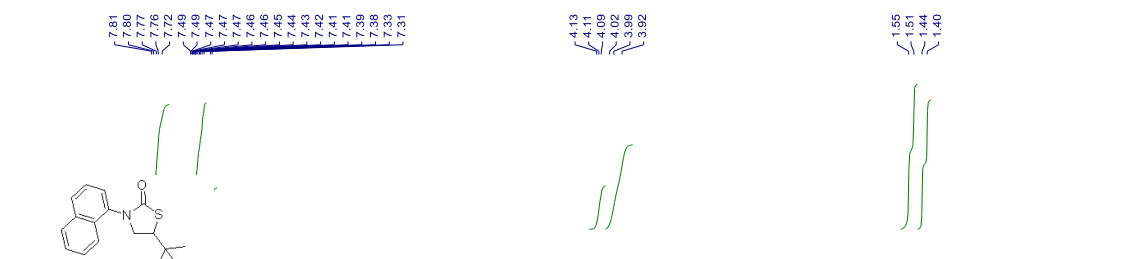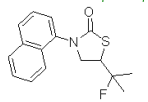

**4f**

<sup>1</sup>H NMR (500 MHz, in CDCl<sub>3</sub>)

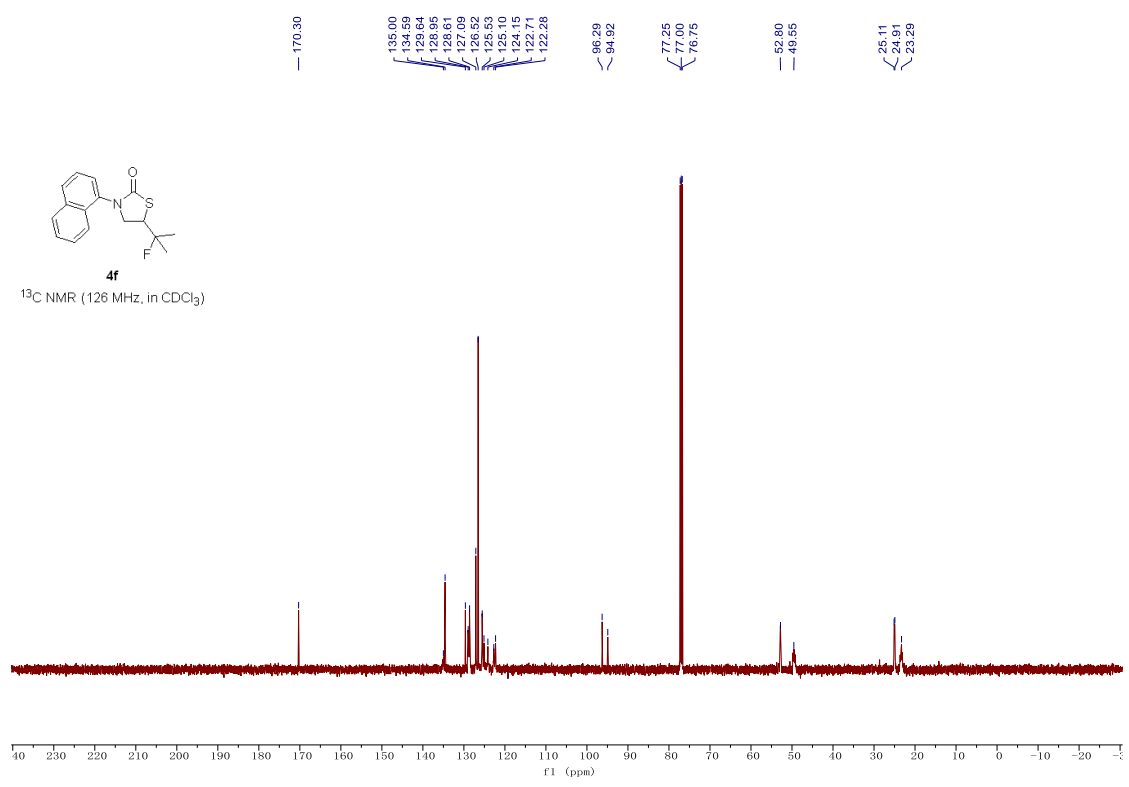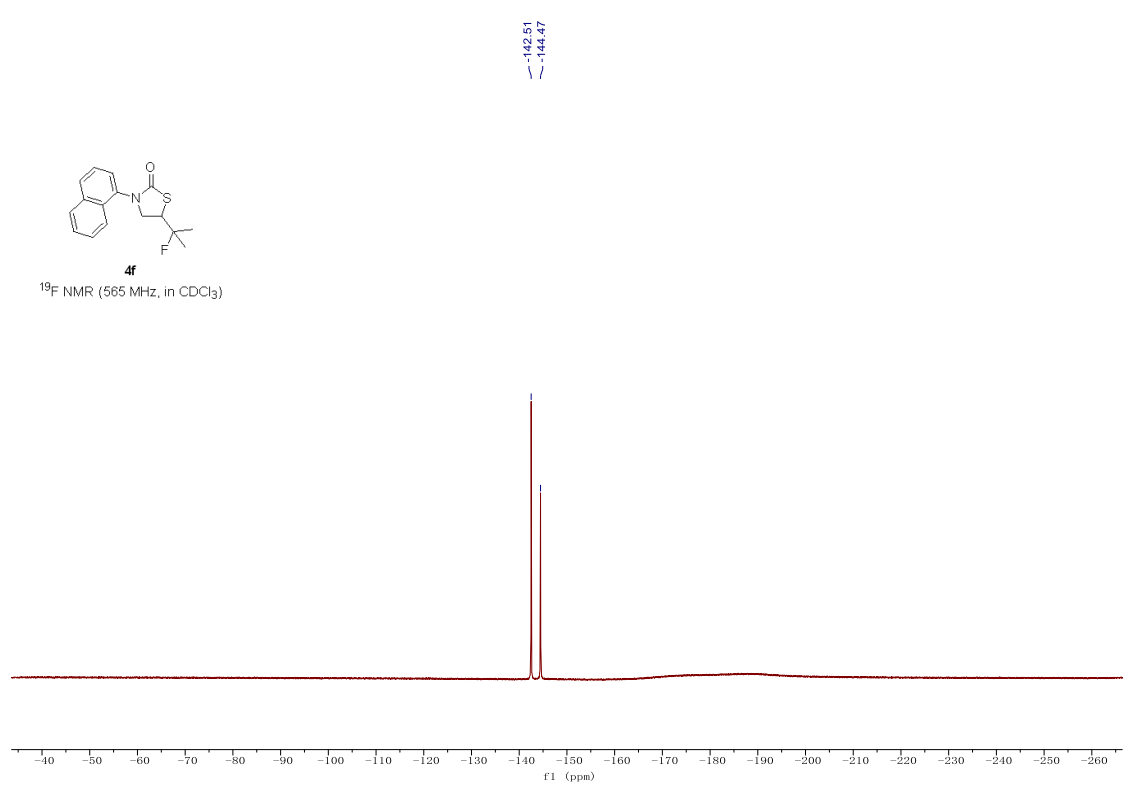

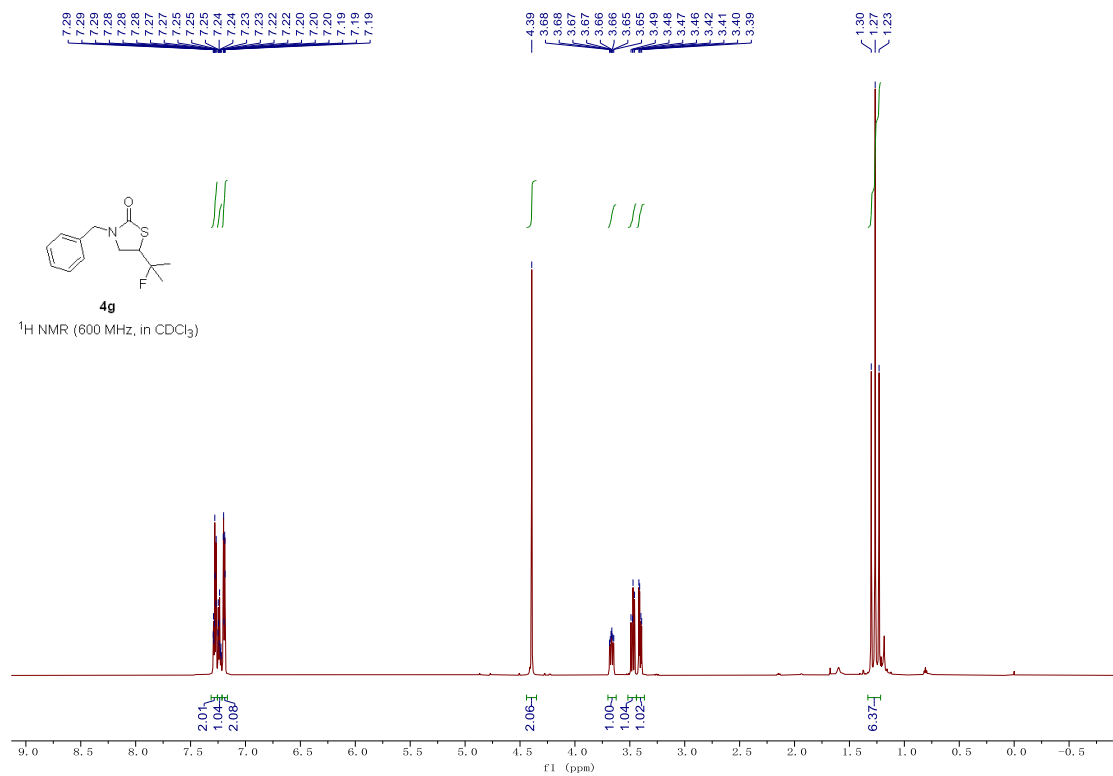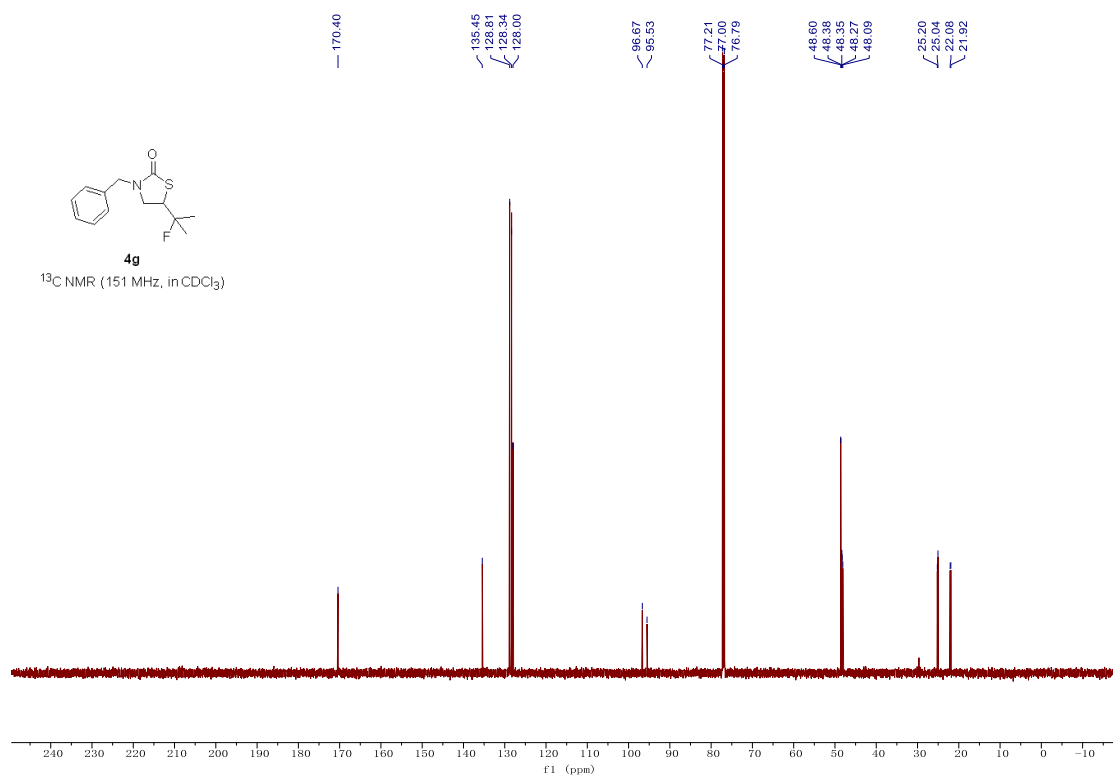

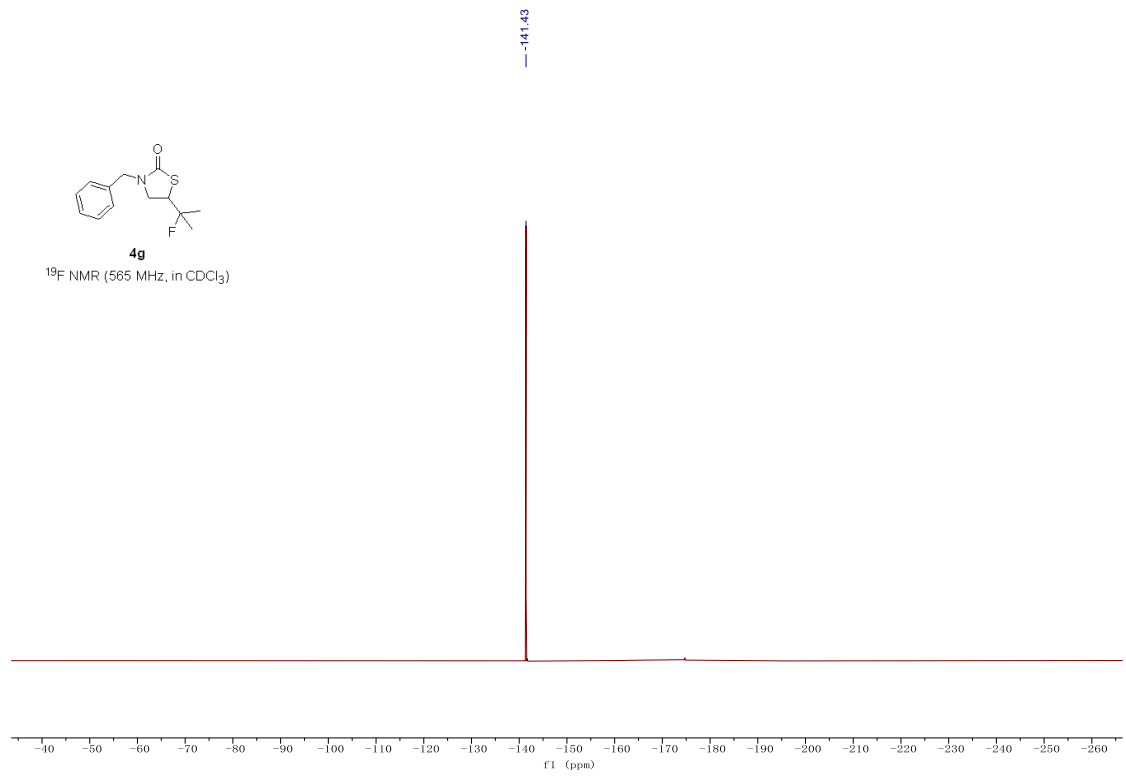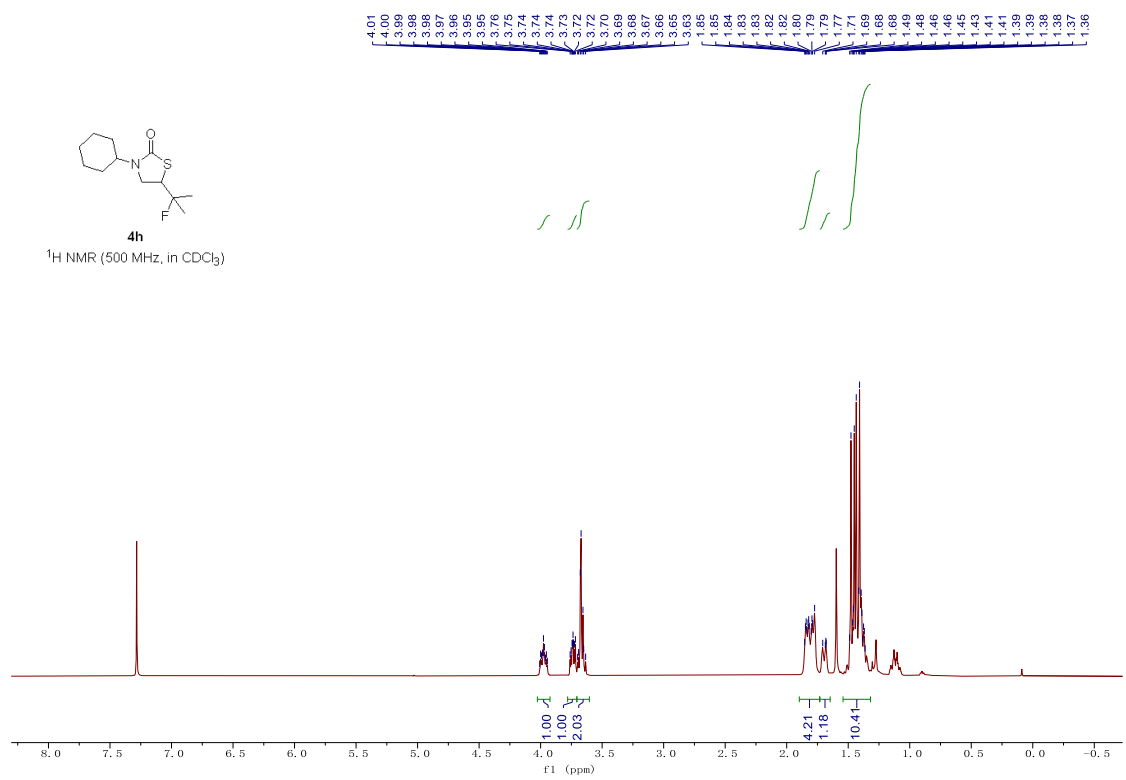

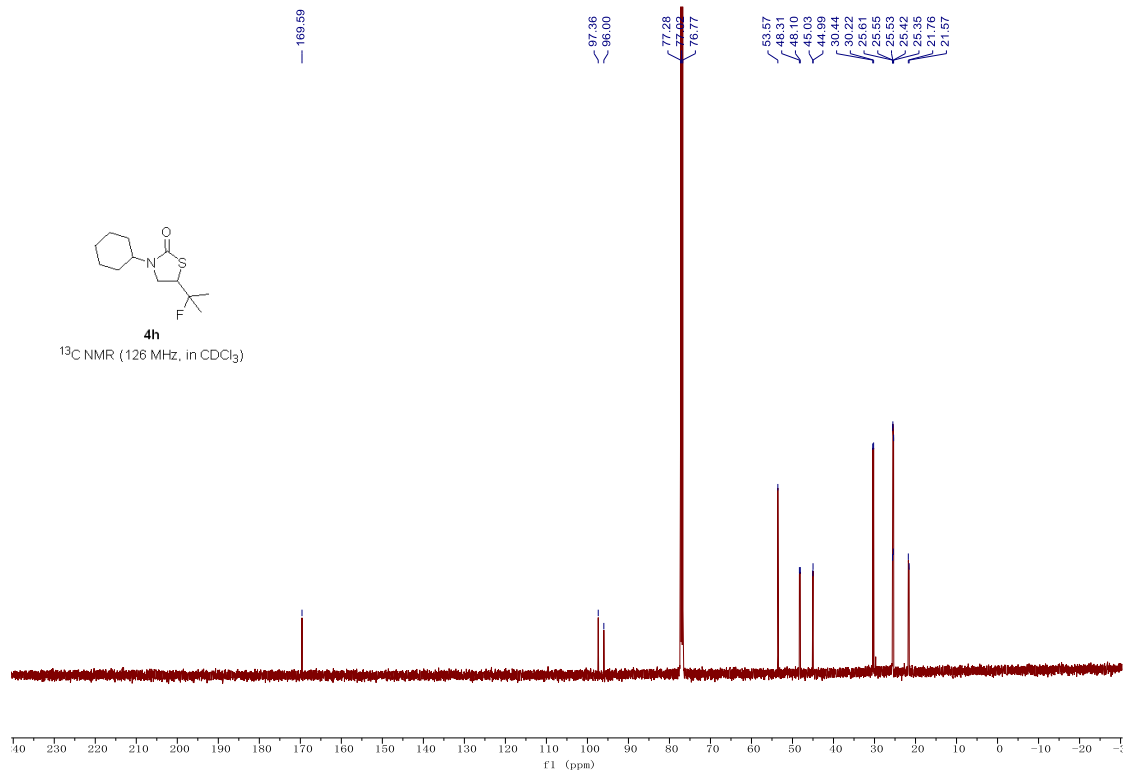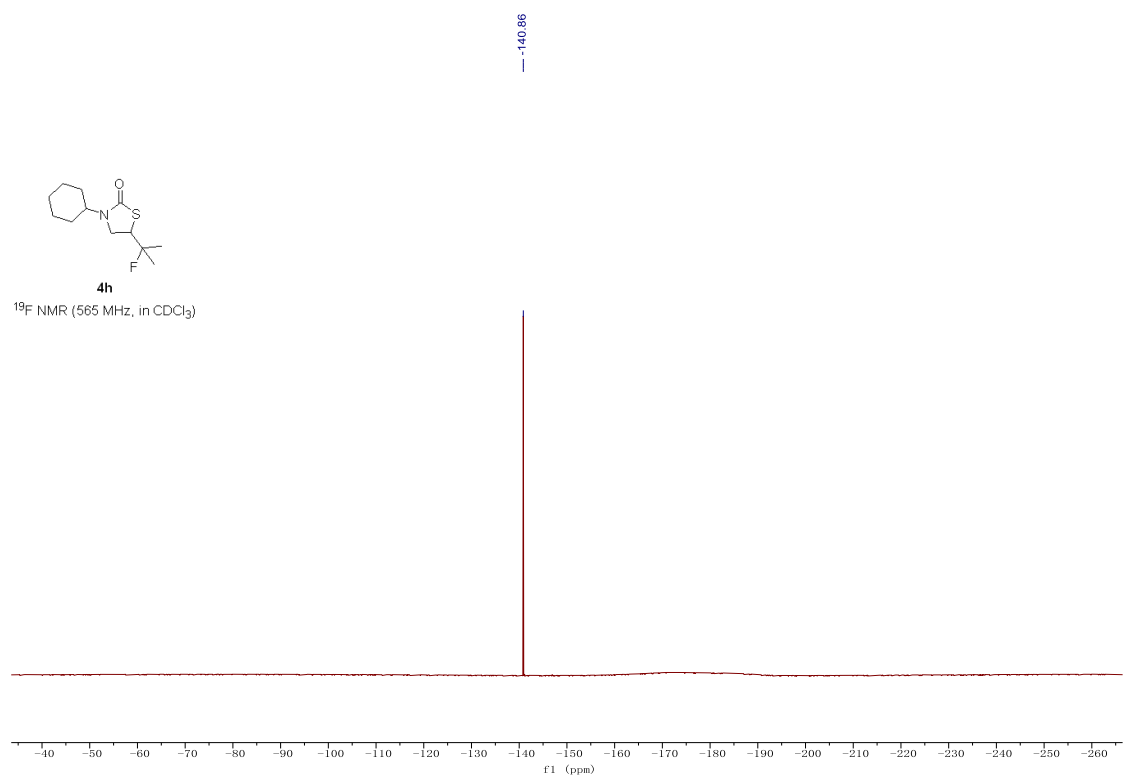

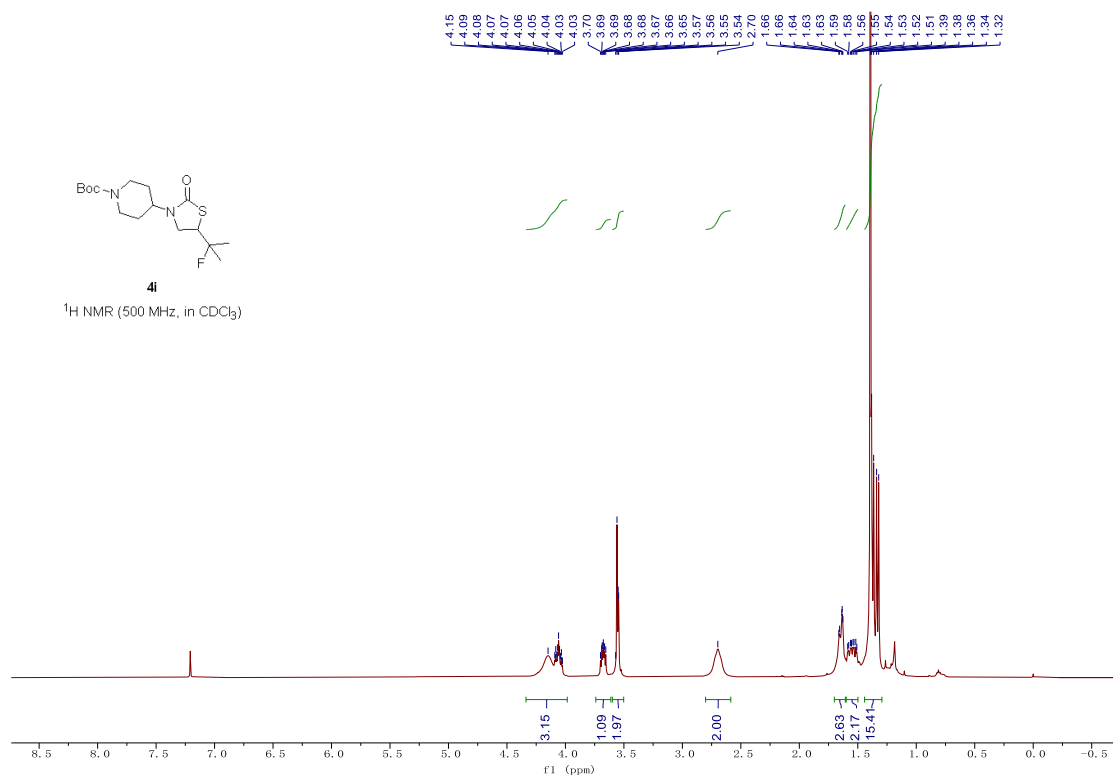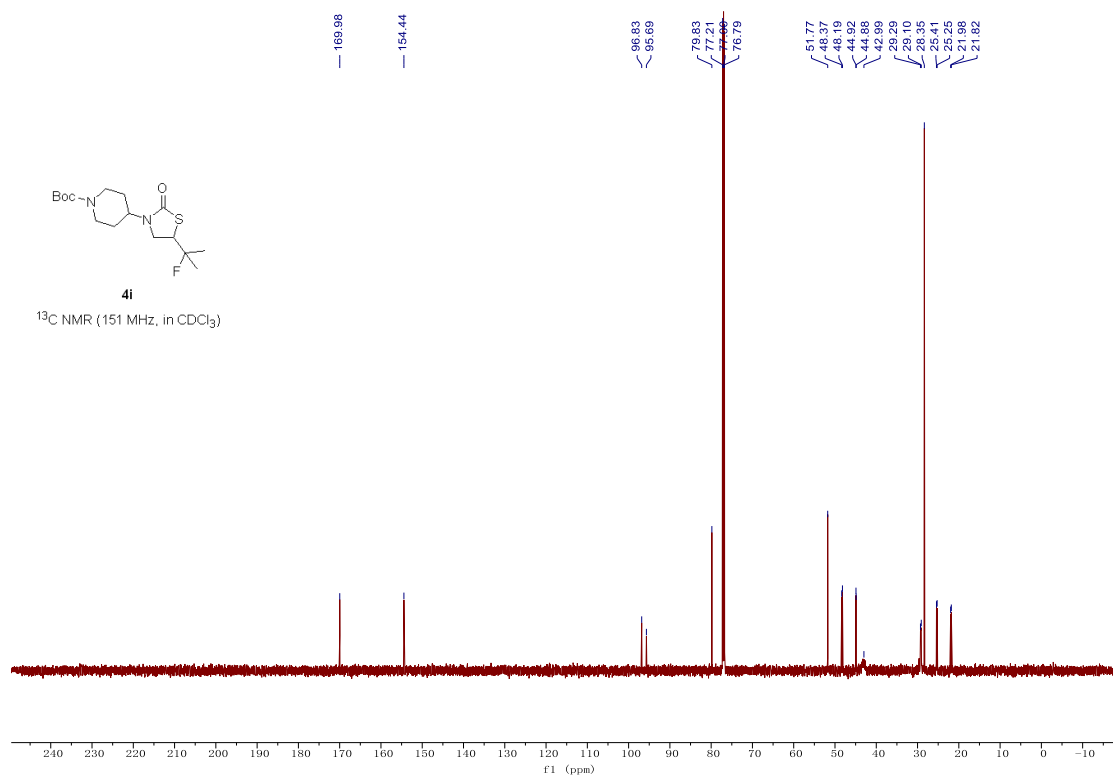

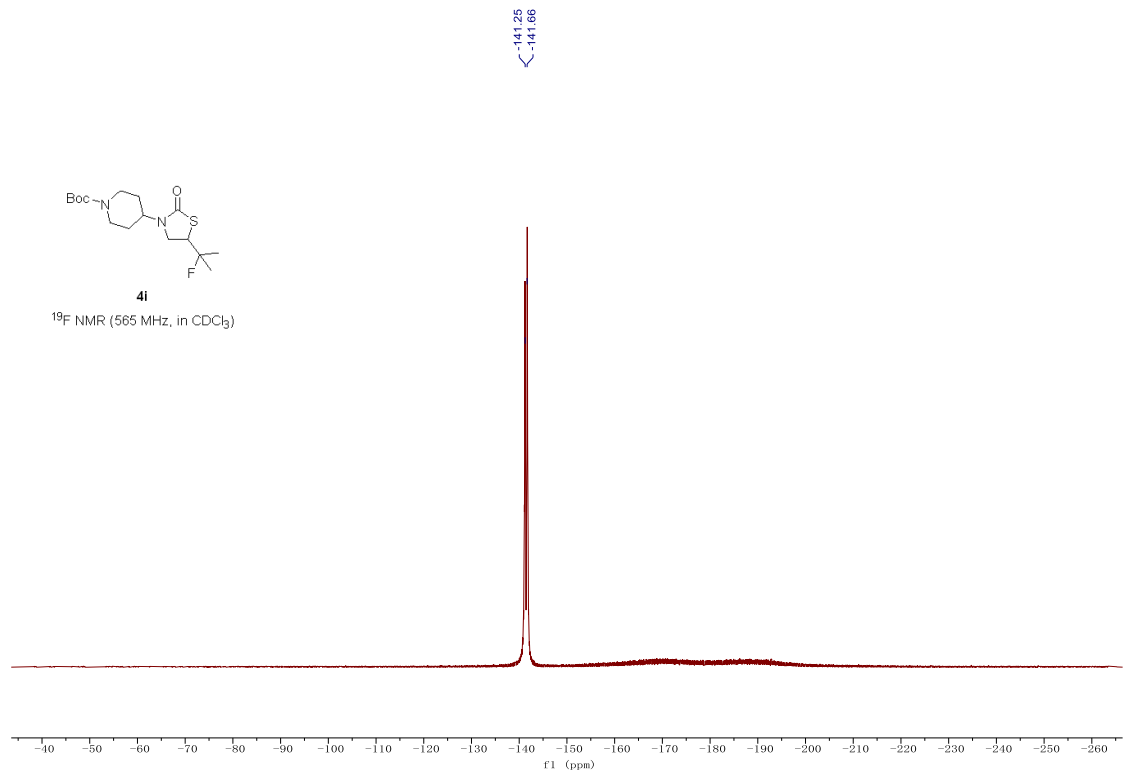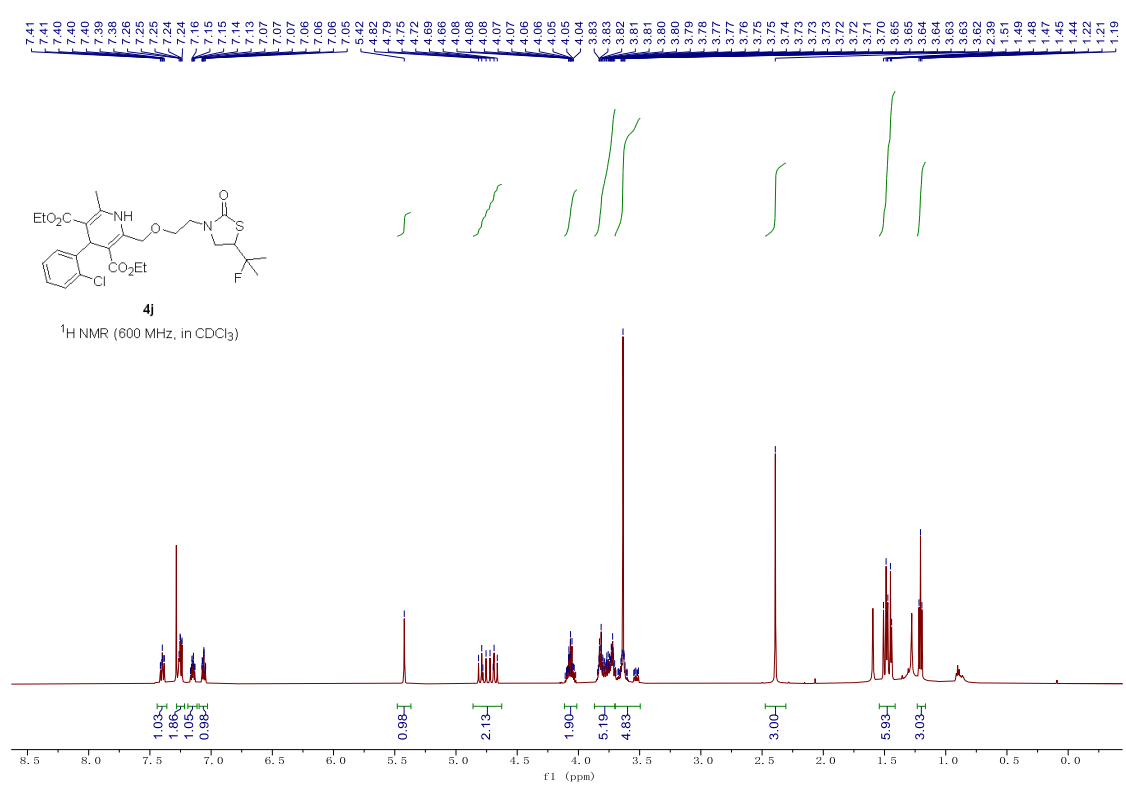

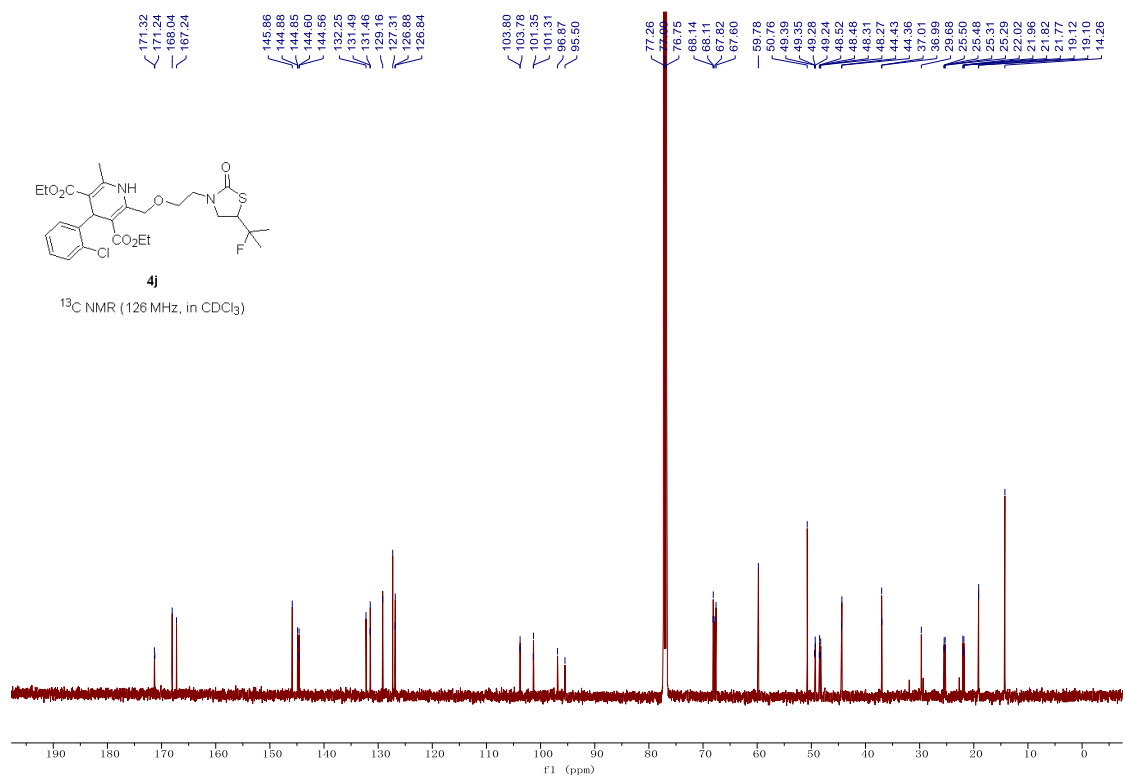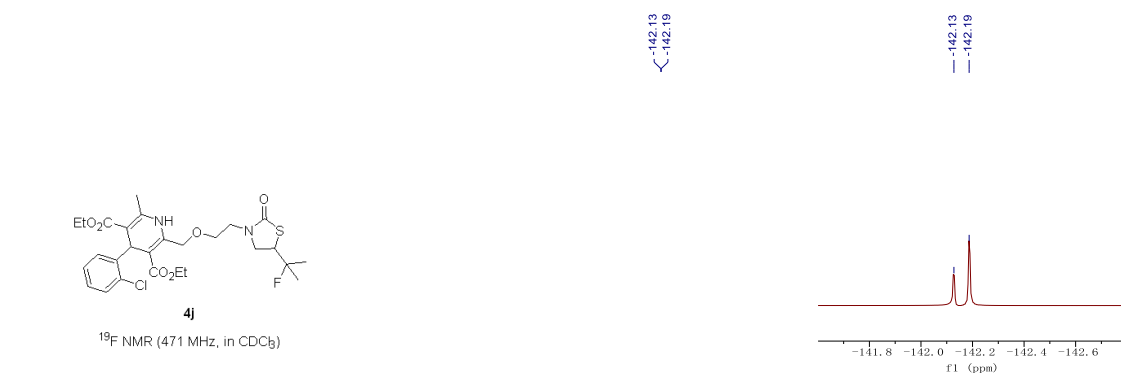



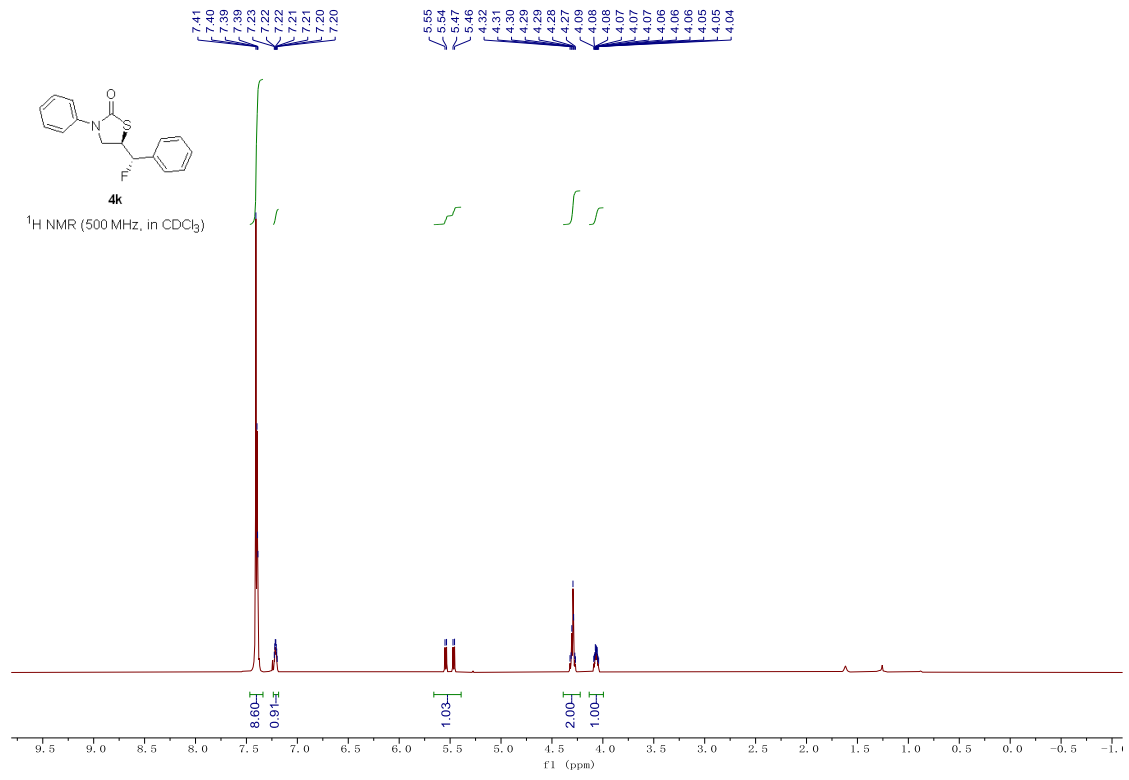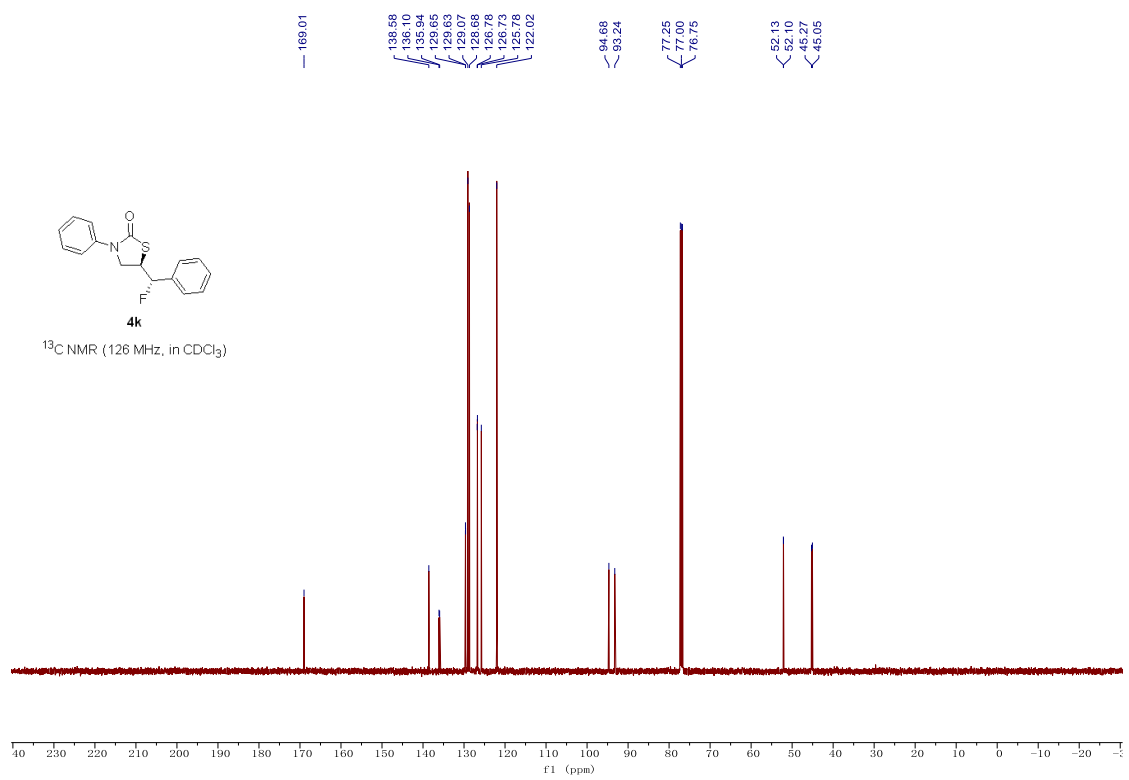

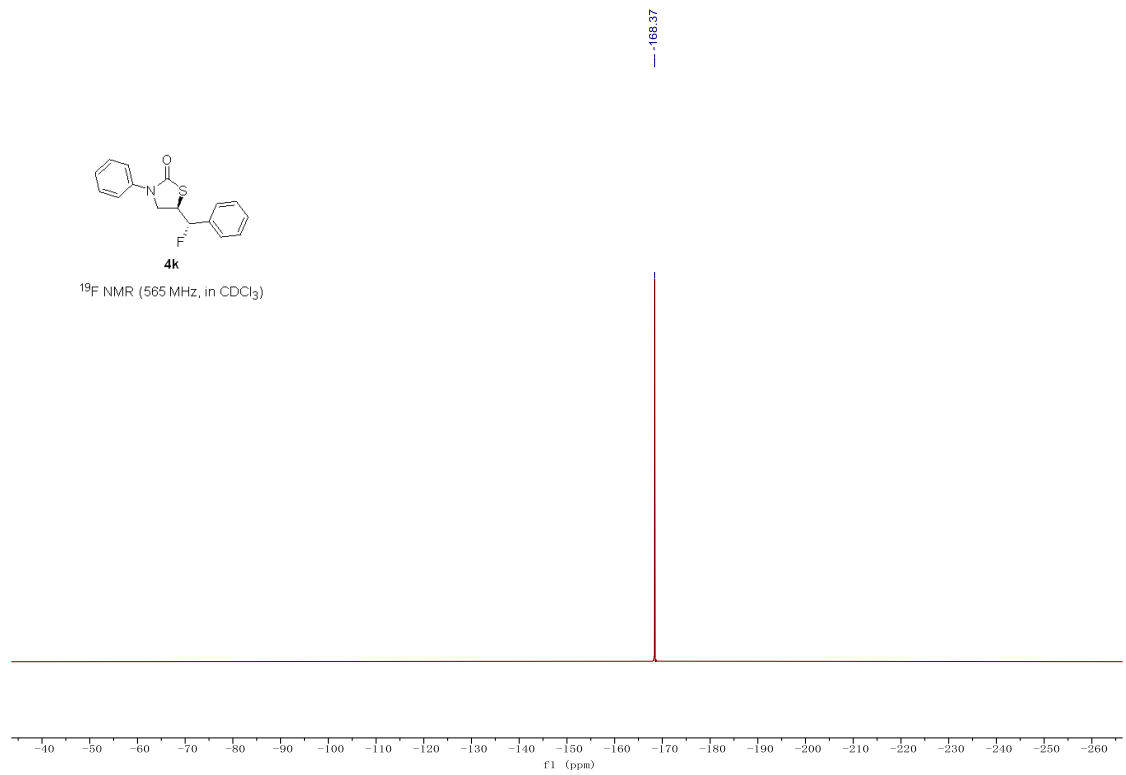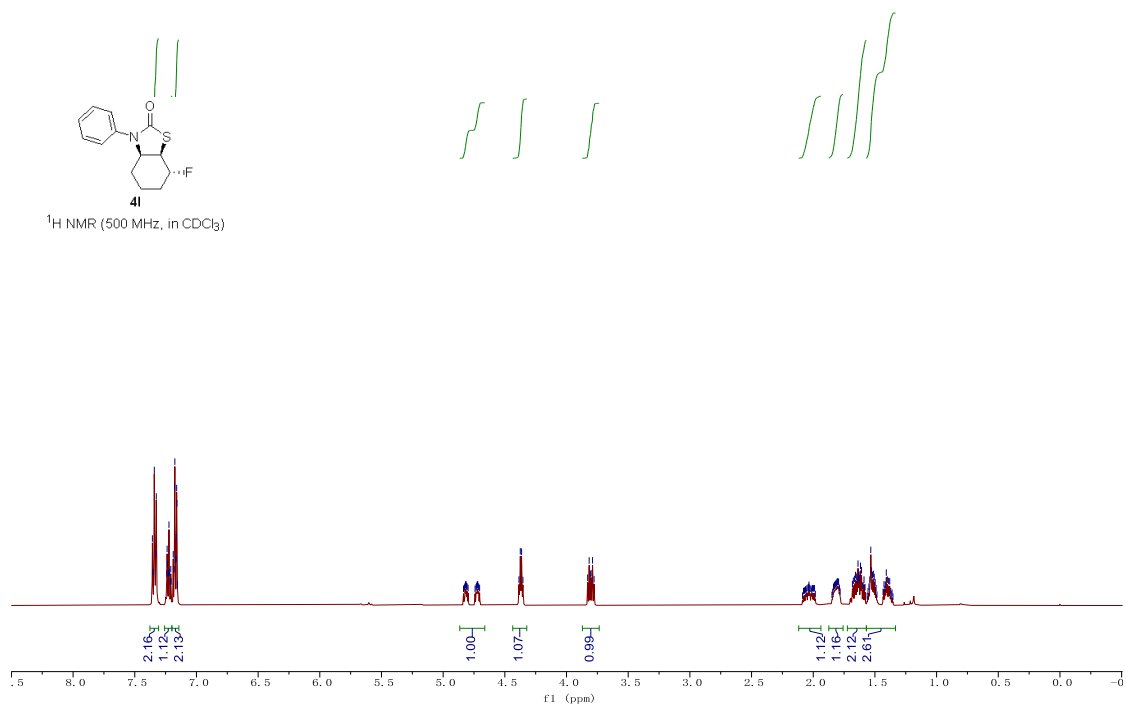

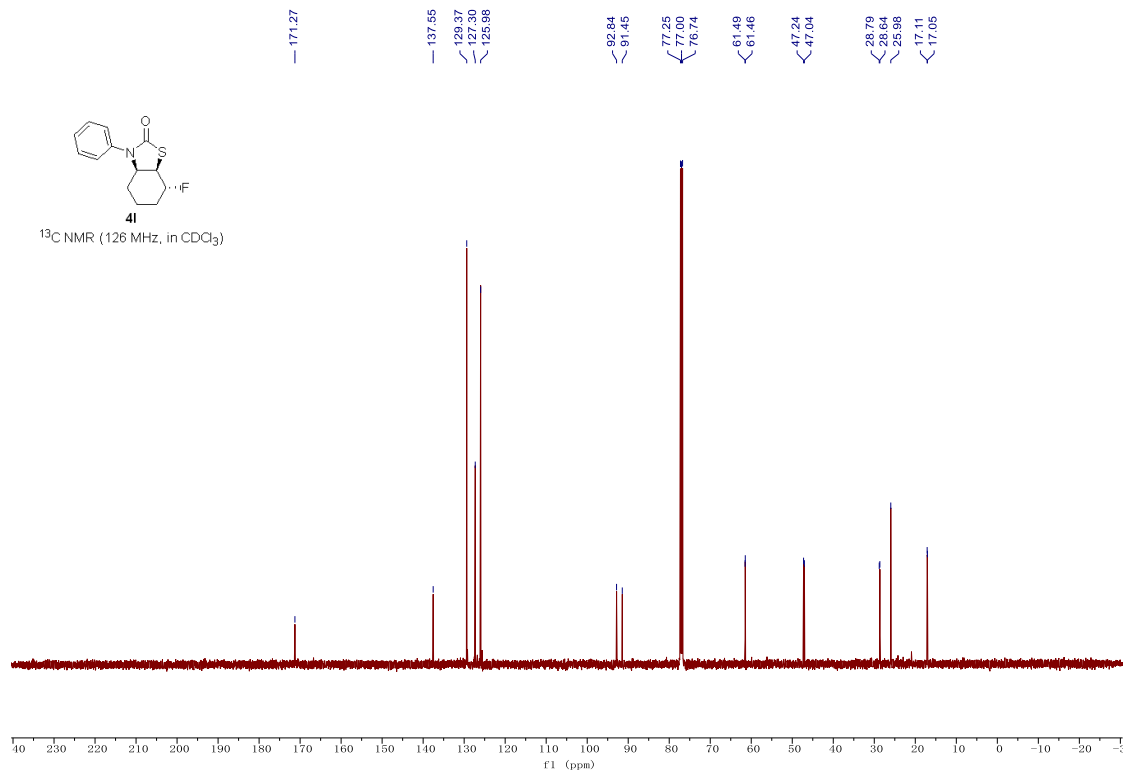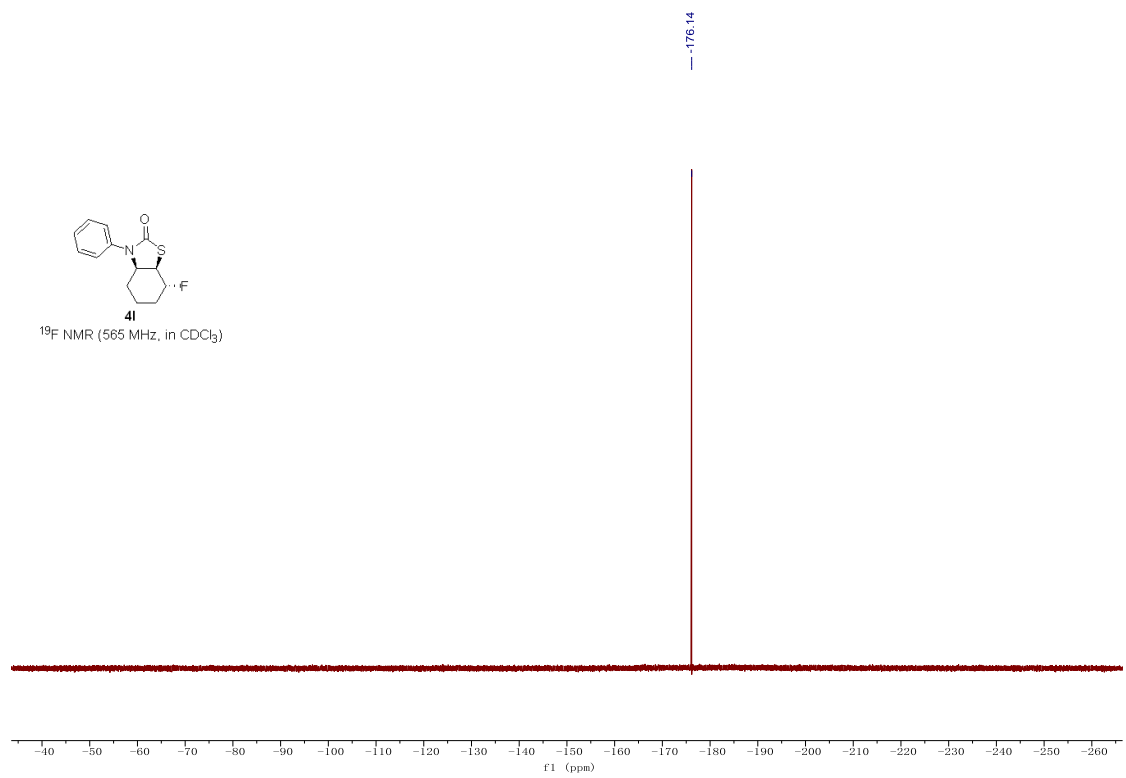

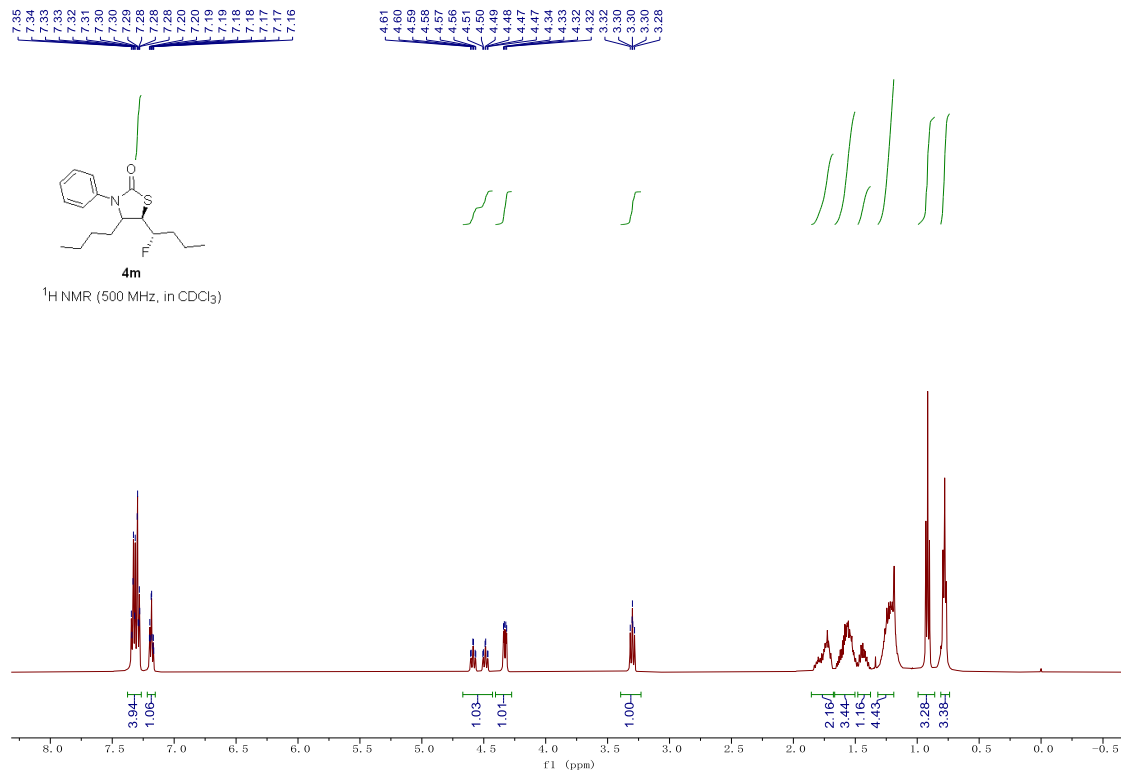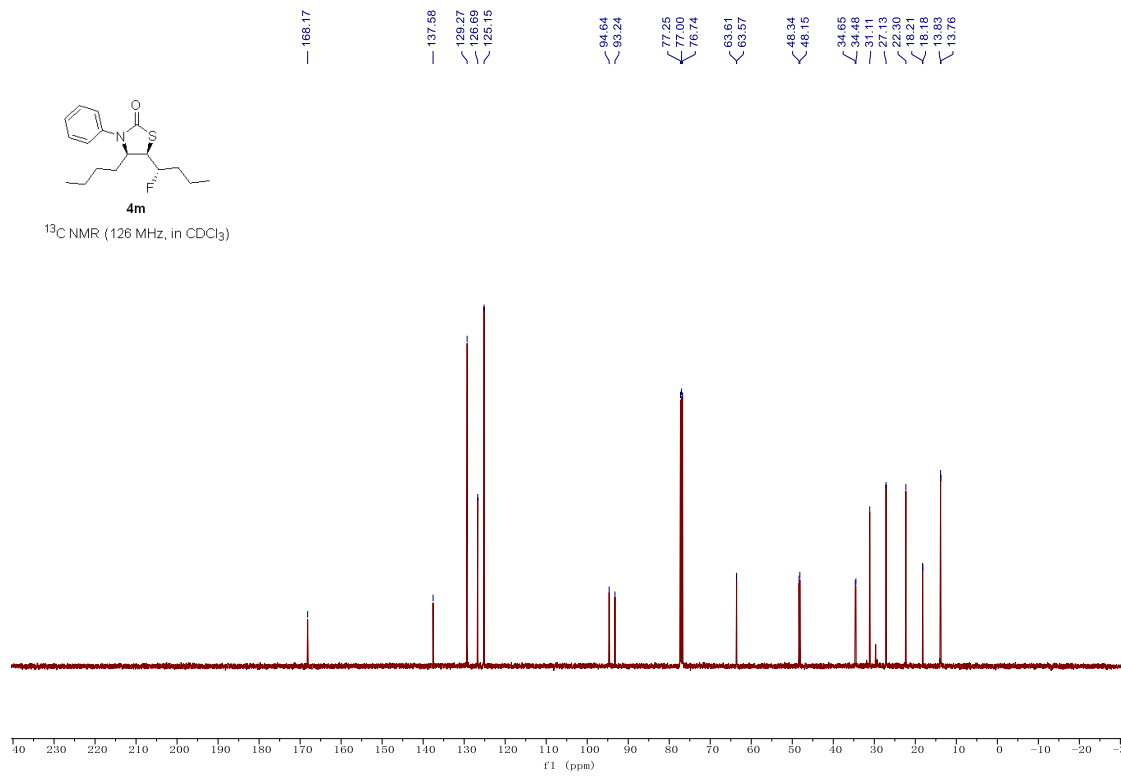

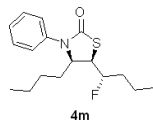

$^{19}\text{F}$  NMR (471 MHz, in  $\text{CDCl}_3$ )

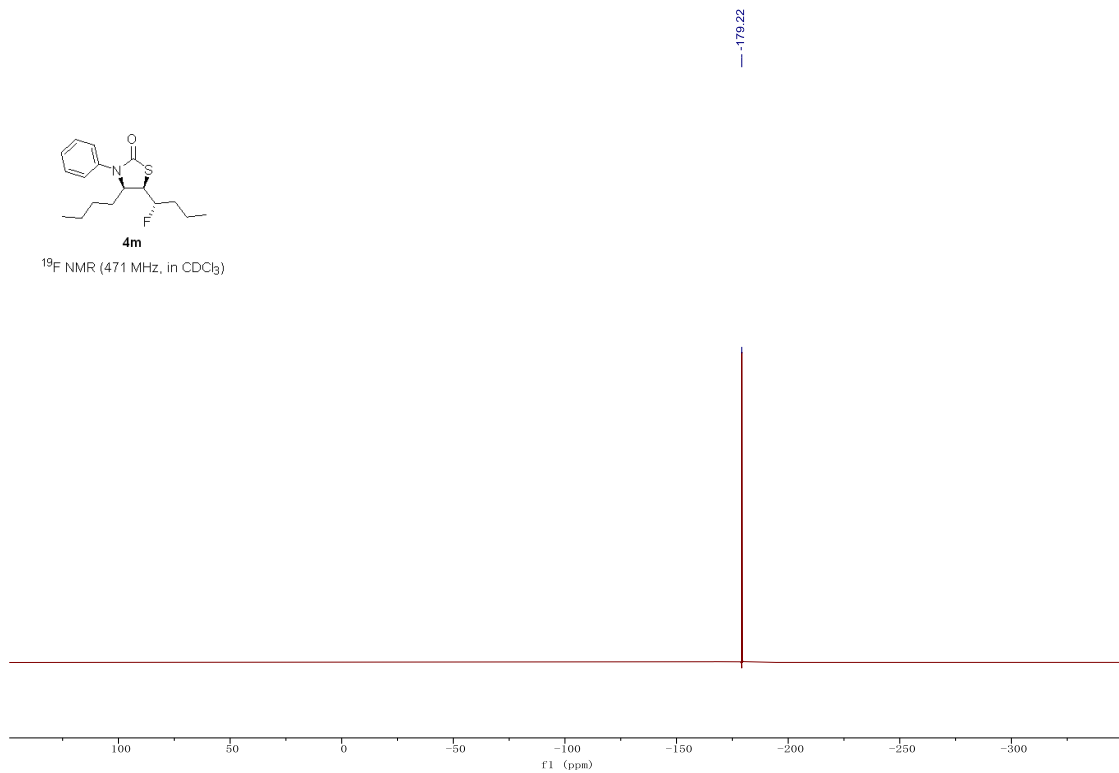

7.43  
7.43  
7.42  
7.42  
7.41  
7.40  
7.37  
7.36  
7.36  
7.35  
7.35  
7.30  
7.29  
7.29  
7.28  
7.28  
7.28  
7.28  
7.26  
7.26  
-4.80  
-4.49  
-4.48  
-4.48  
-4.45  
-4.45  
-4.30  
-4.29  
-4.28  
-4.28  
-4.27  
-4.27  
-4.25  
-4.25  
-4.22  
-4.22  
-4.181  
-4.181  
-4.180  
-4.180  
-4.179  
-4.179  
-4.178  
-4.178  
-4.177  
-4.177  
-4.175  
-4.175  
-4.165  
-4.164  
-4.164  
-4.163  
-4.162  
-4.162  
-4.161  
-4.161  
-4.159  
-4.159  
-4.153  
-4.153  
-4.151  
-4.151  
-4.149  
-4.149  
-4.134  
-4.134  
-4.133  
-4.133  
-4.132  
-4.132  
-4.131  
-4.131  
-4.129  
-4.129  
-4.127  
-4.127  
-4.126  
-4.126  
-4.125  
-4.125  
-4.124  
-4.124  
-4.123  
-4.123  
-4.122  
-4.122  
-4.121  
-4.121  
-4.103  
-4.103  
-4.101  
-4.101  
-4.099  
-4.099  
-4.083  
-4.083  
-4.082  
-4.082

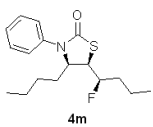

$^1\text{H}$  NMR (500 MHz, in  $\text{CDCl}_3$ )

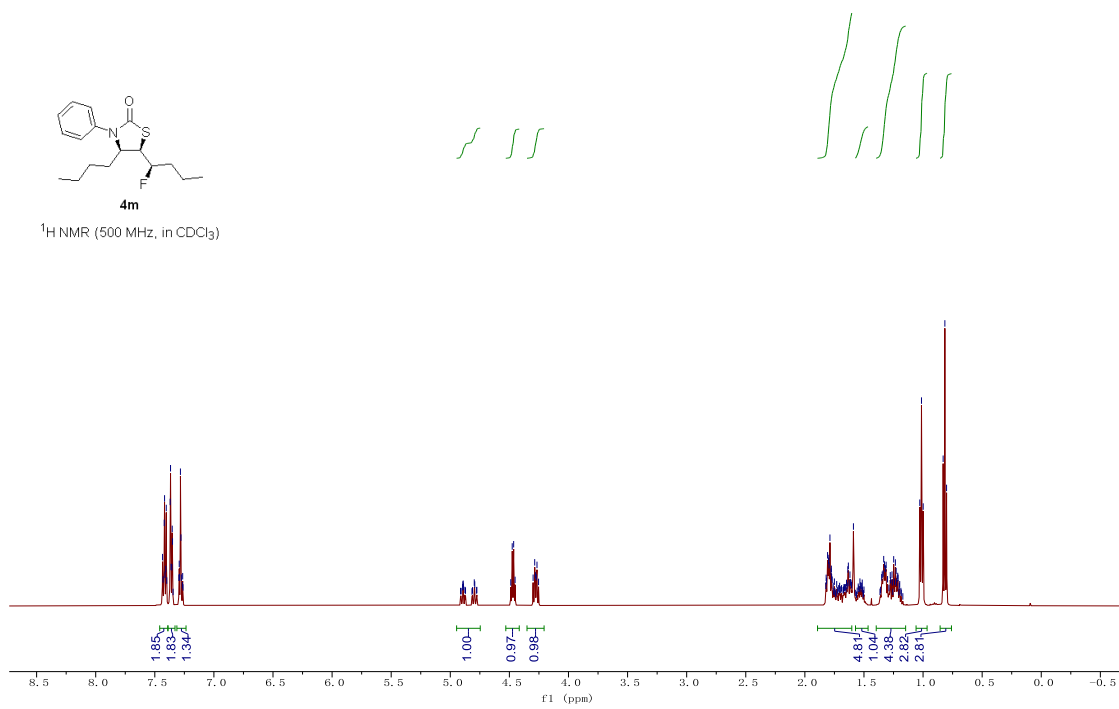

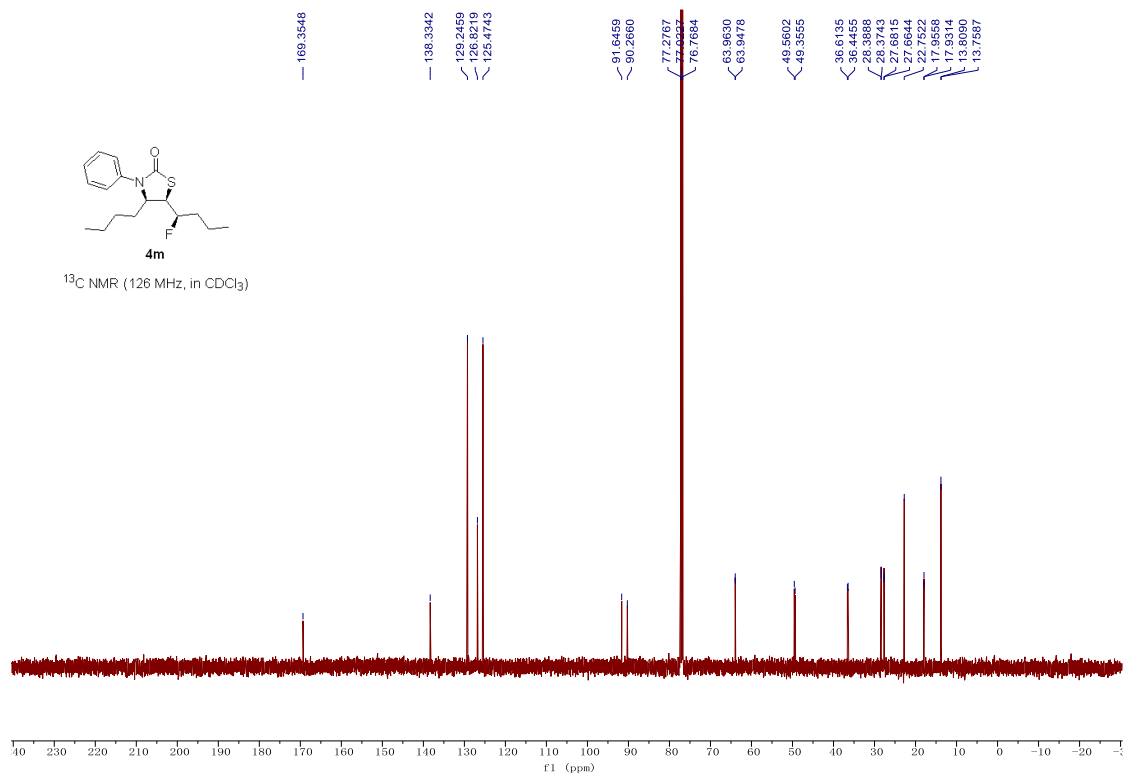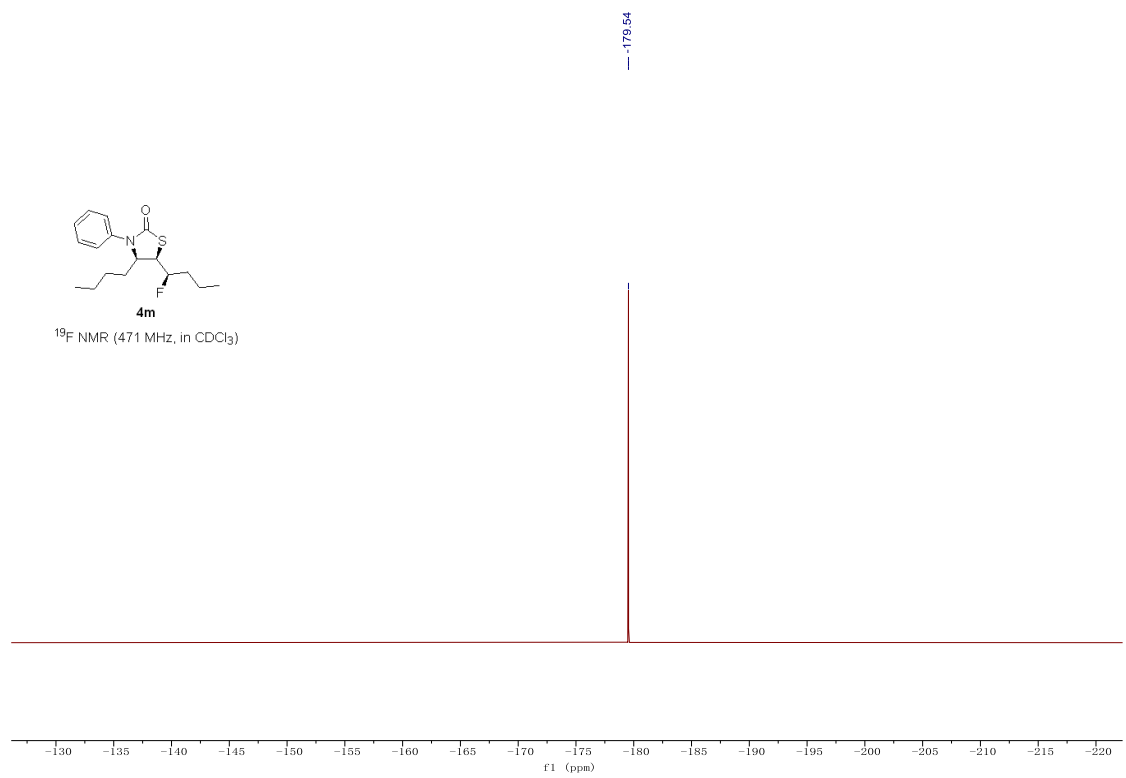

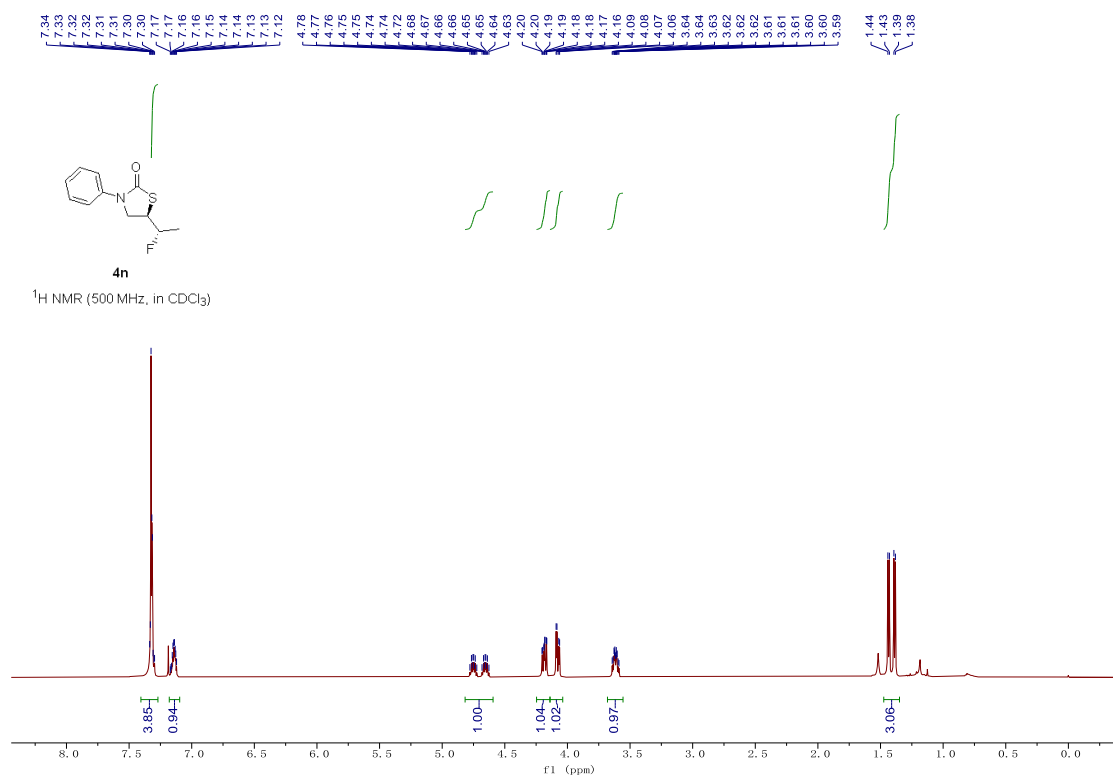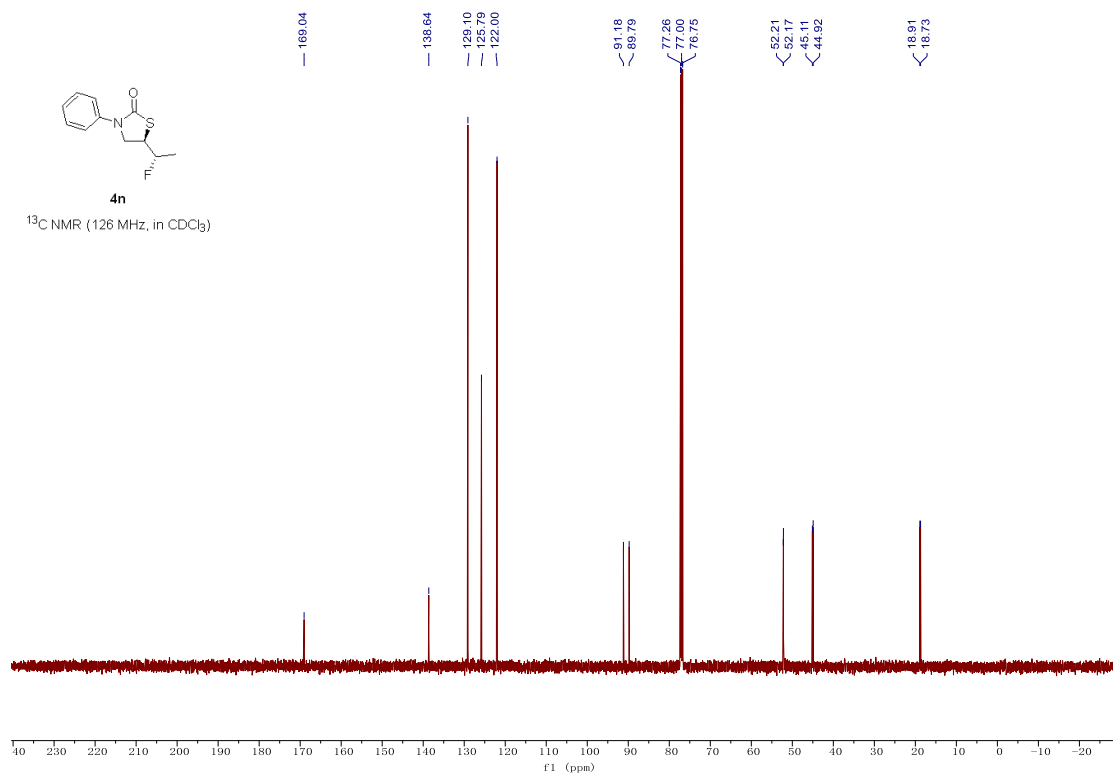

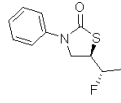

4n

$^{19}\text{F}$  NMR (471 MHz, in  $\text{CDCl}_3$ )

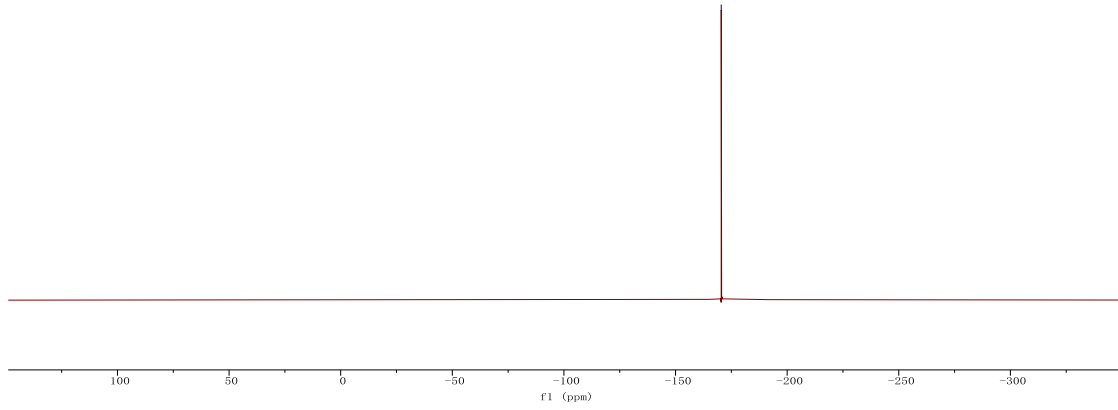

7.35  
7.34  
7.33  
7.32  
7.31  
7.30  
7.29  
7.17  
7.16  
7.15  
7.14  
7.13  
7.12  
7.11  
7.10  
7.09  
7.08  
7.07  
7.06  
7.05  
7.04  
7.03  
7.02  
7.01  
7.00  
6.99  
6.98  
6.97  
6.96  
6.95  
6.94  
6.93  
6.92  
6.91  
6.90  
6.89  
6.88  
6.87  
6.86  
6.85  
6.84  
6.83  
4.84  
4.83  
4.82  
4.81  
4.80  
4.79  
4.78  
4.77  
4.76  
4.75  
4.74  
4.73  
4.72  
4.71  
4.17  
4.15  
4.13  
3.95  
3.94  
3.93  
3.92  
3.90  
3.89  
3.88  
3.87  
3.86  
3.85  
3.84  
3.83  
1.44  
1.43  
1.40  
1.38

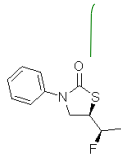

4n

$^1\text{H}$  NMR (500 MHz, in  $\text{CDCl}_3$ )

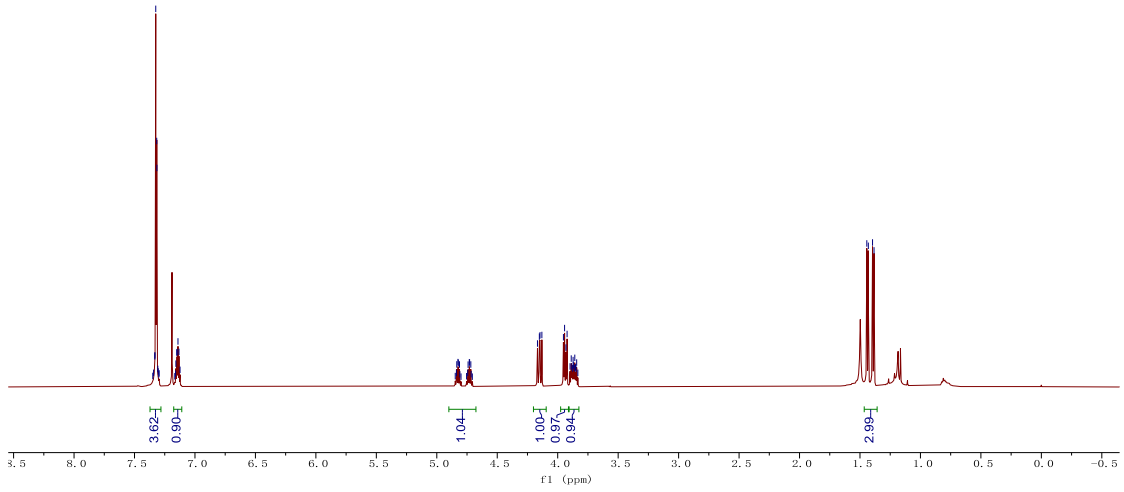



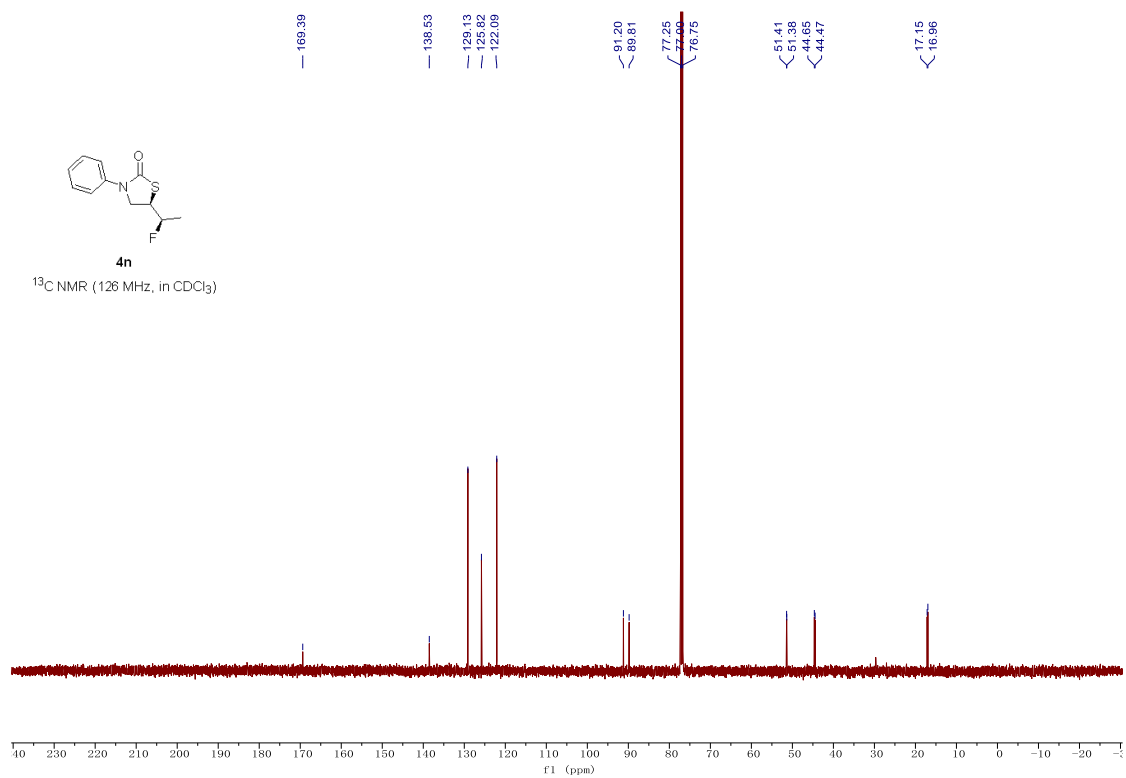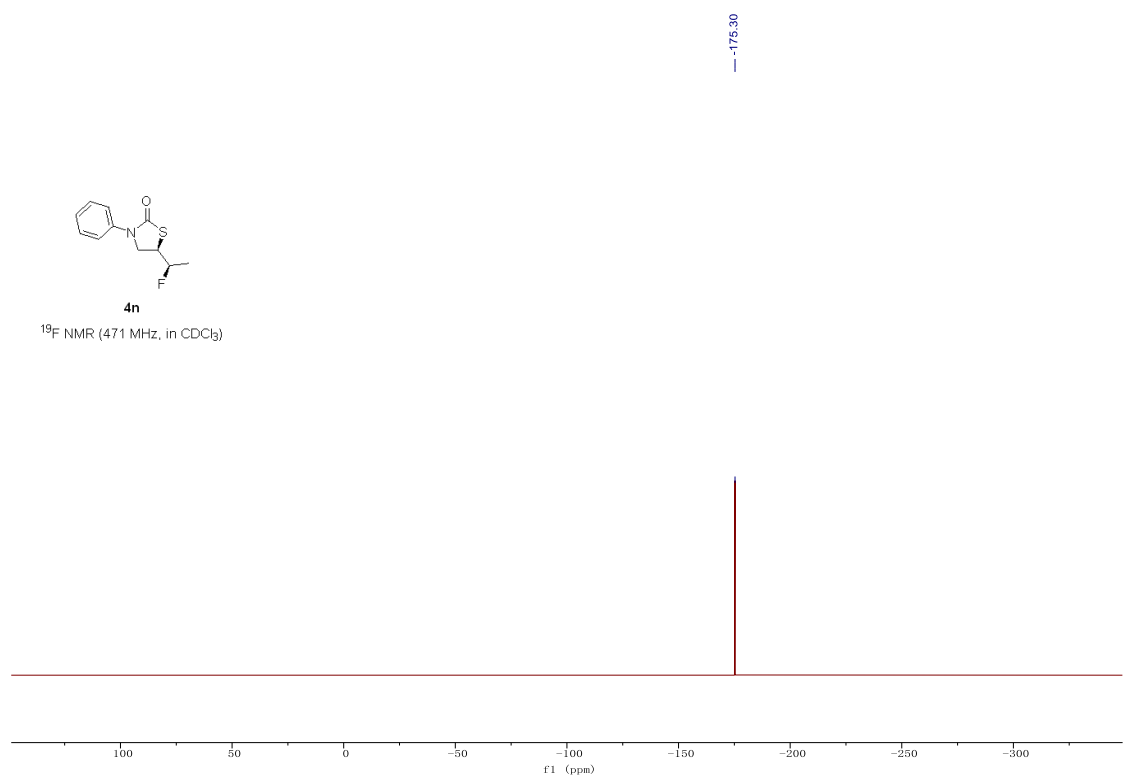

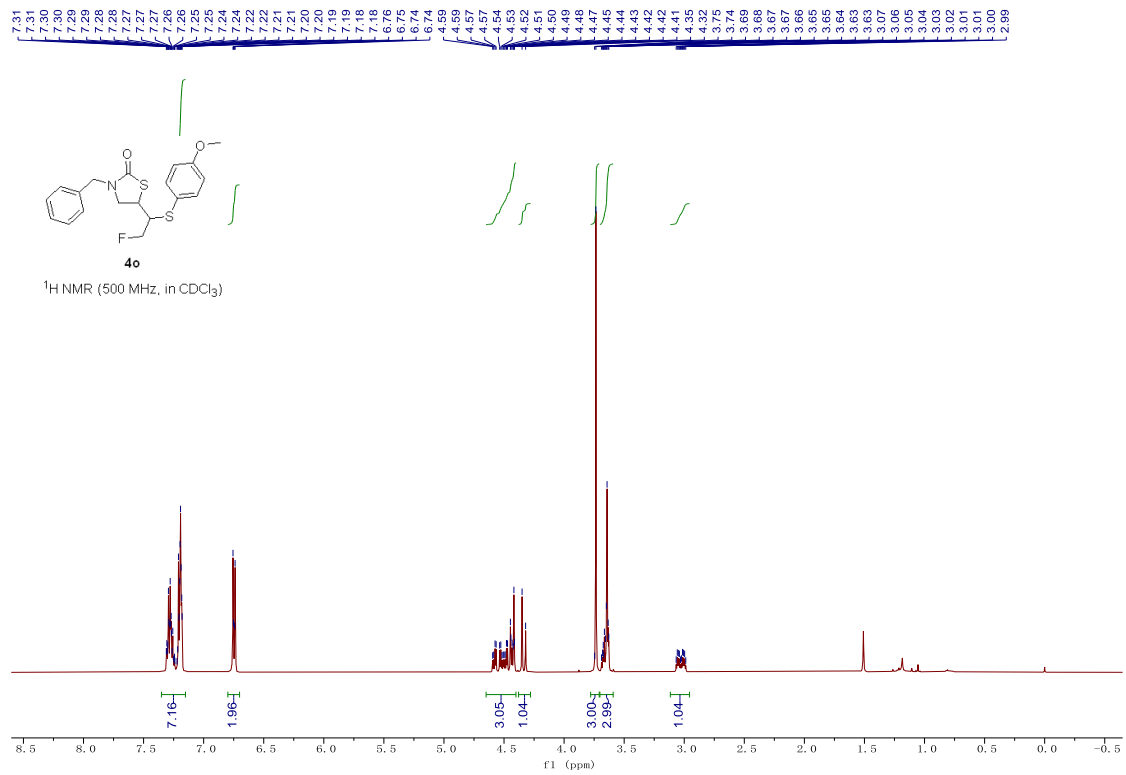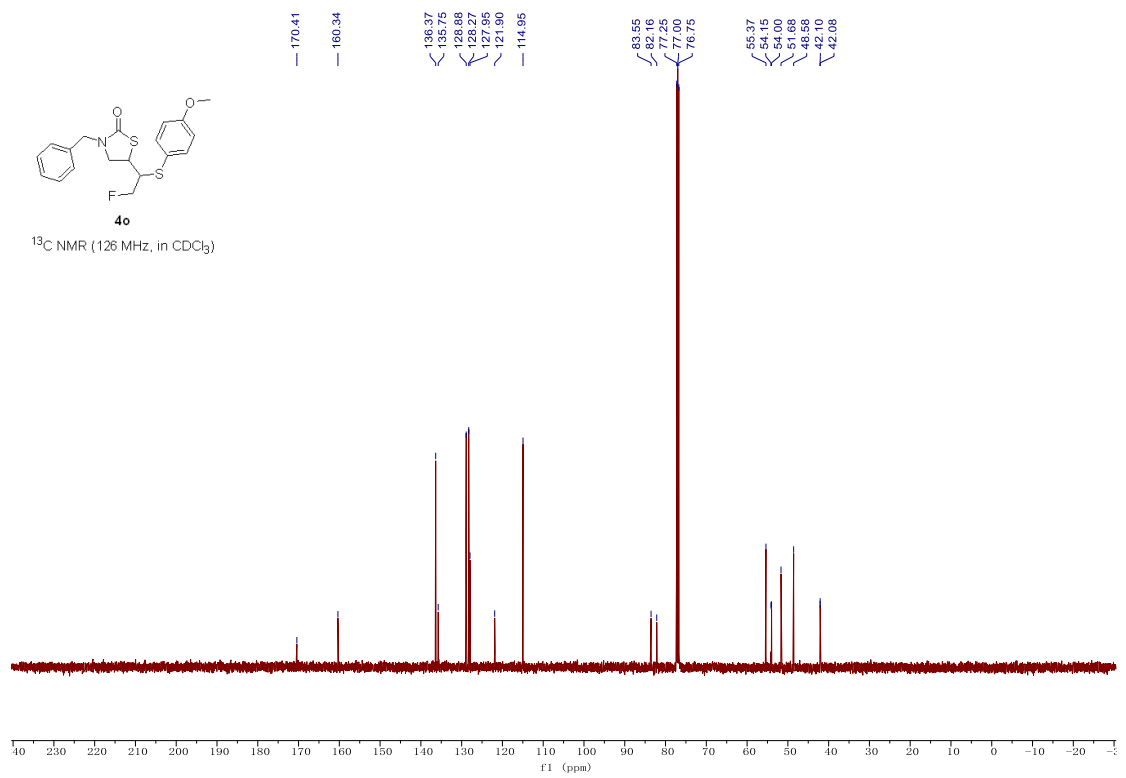

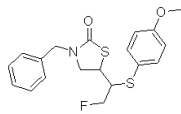

4o

<sup>19</sup>F NMR (471 MHz, in CDCl<sub>3</sub>)

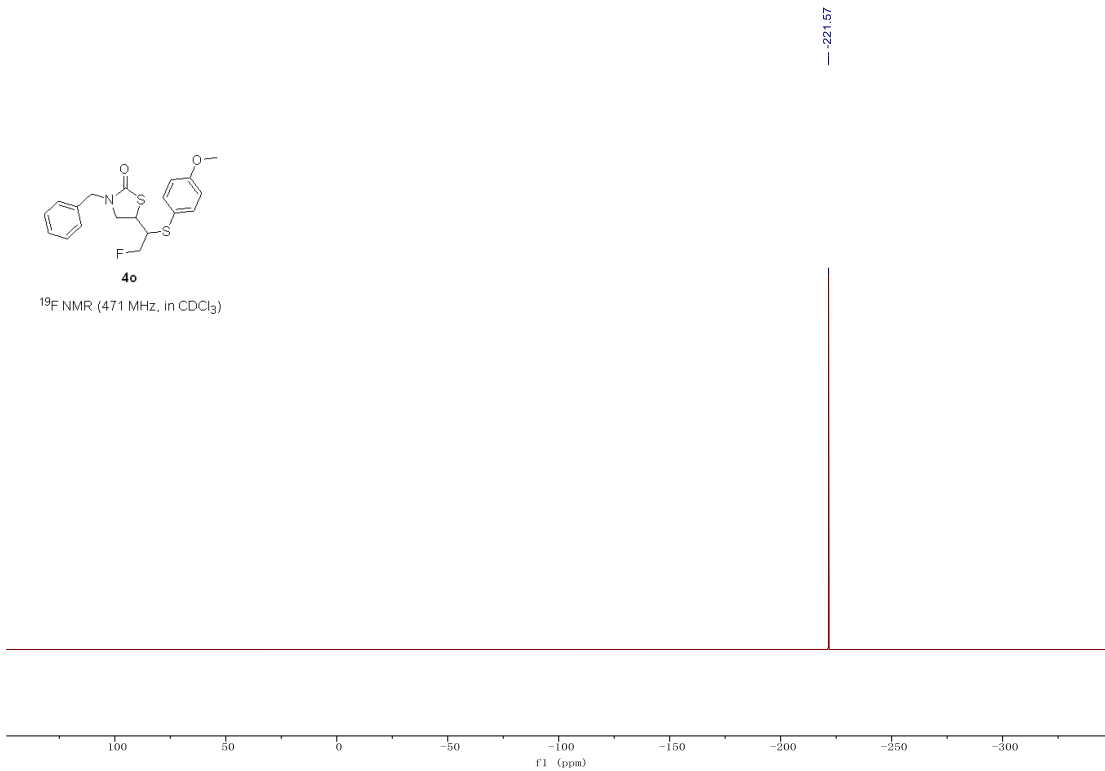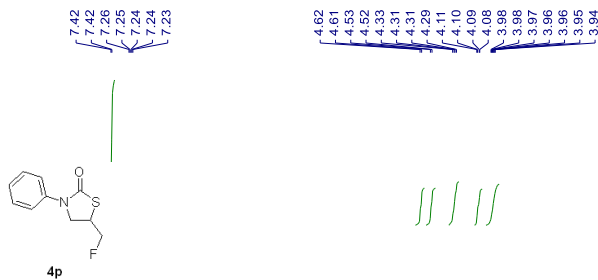

4p

<sup>1</sup>H NMR (500 MHz, in CDCl<sub>3</sub>)

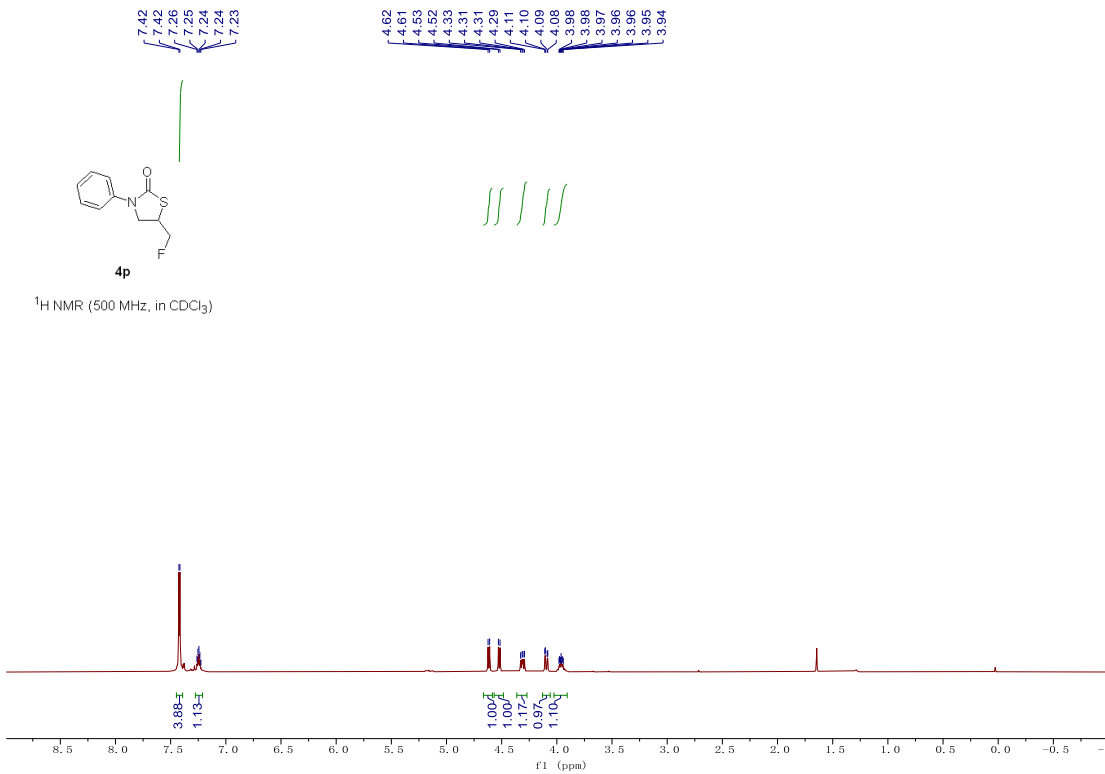

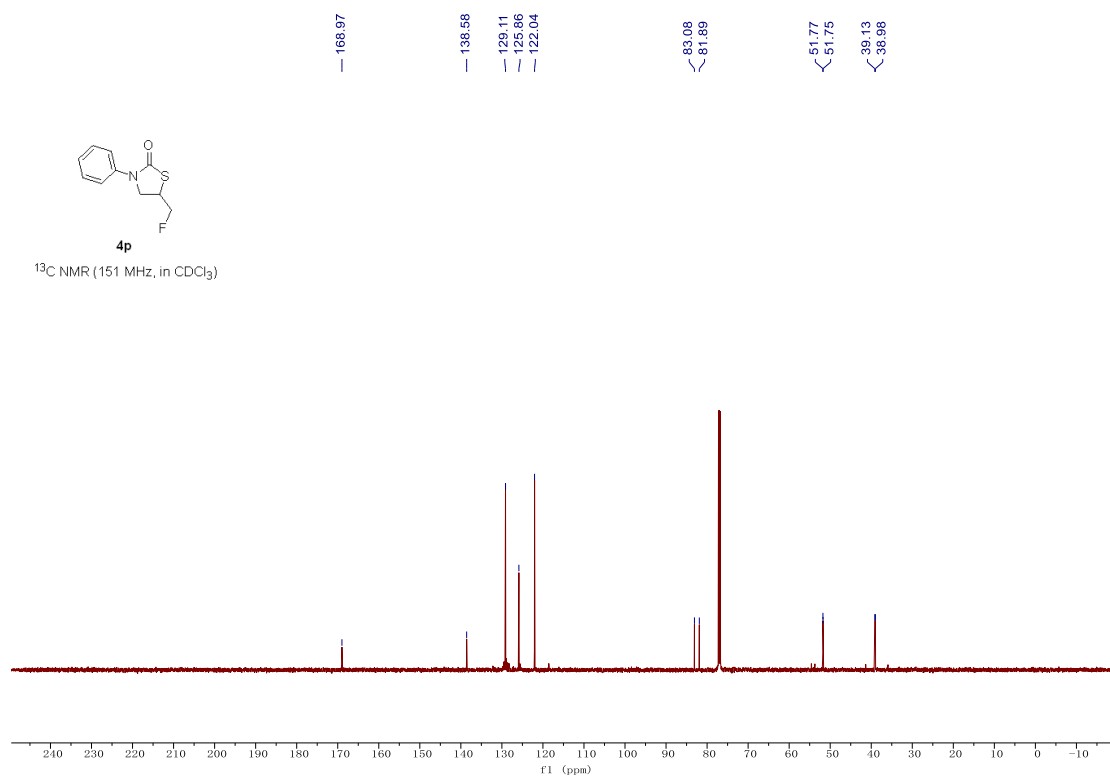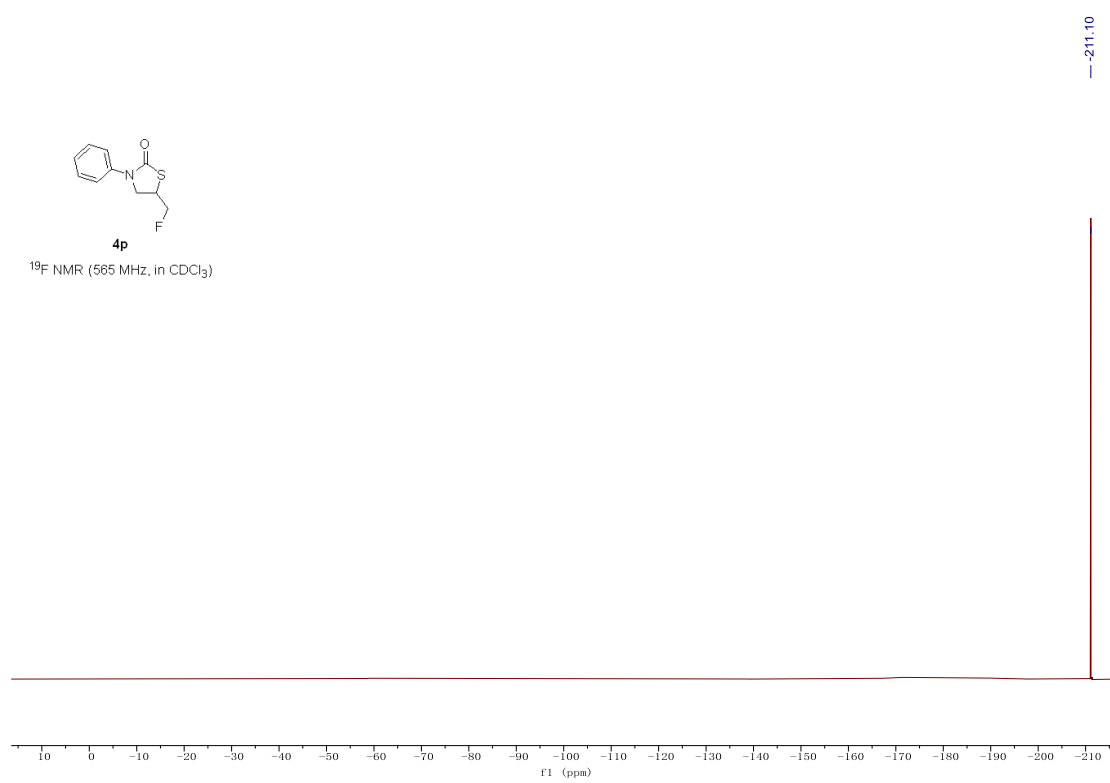

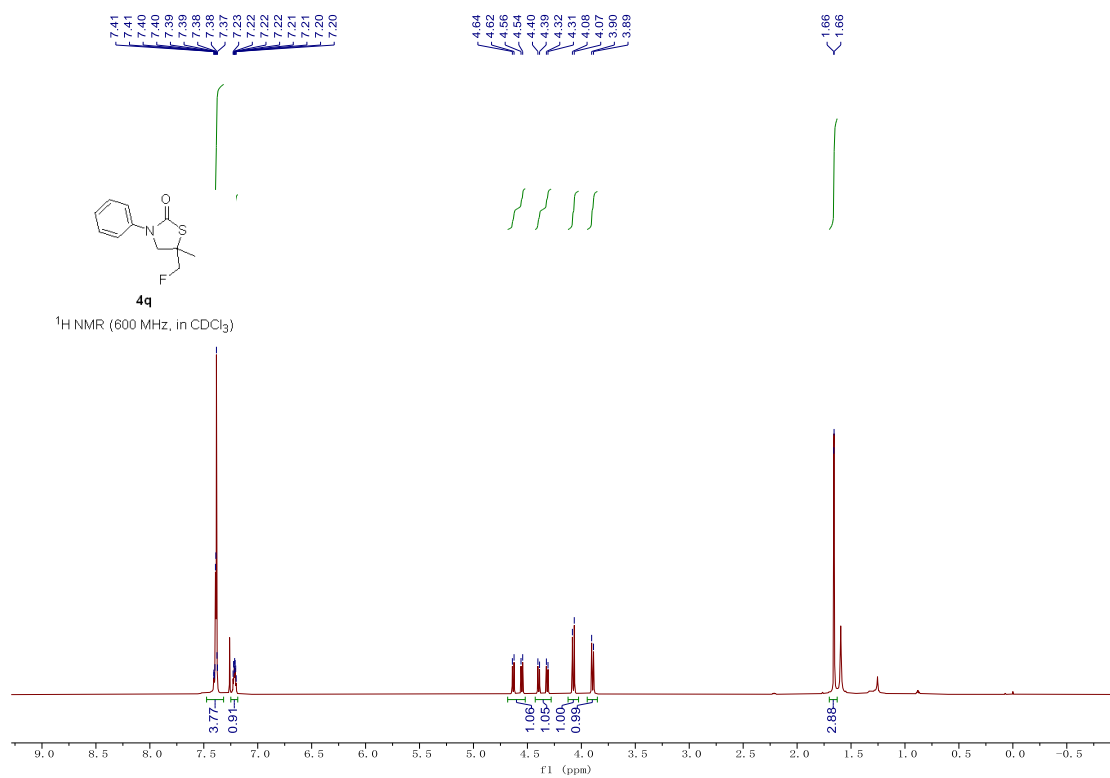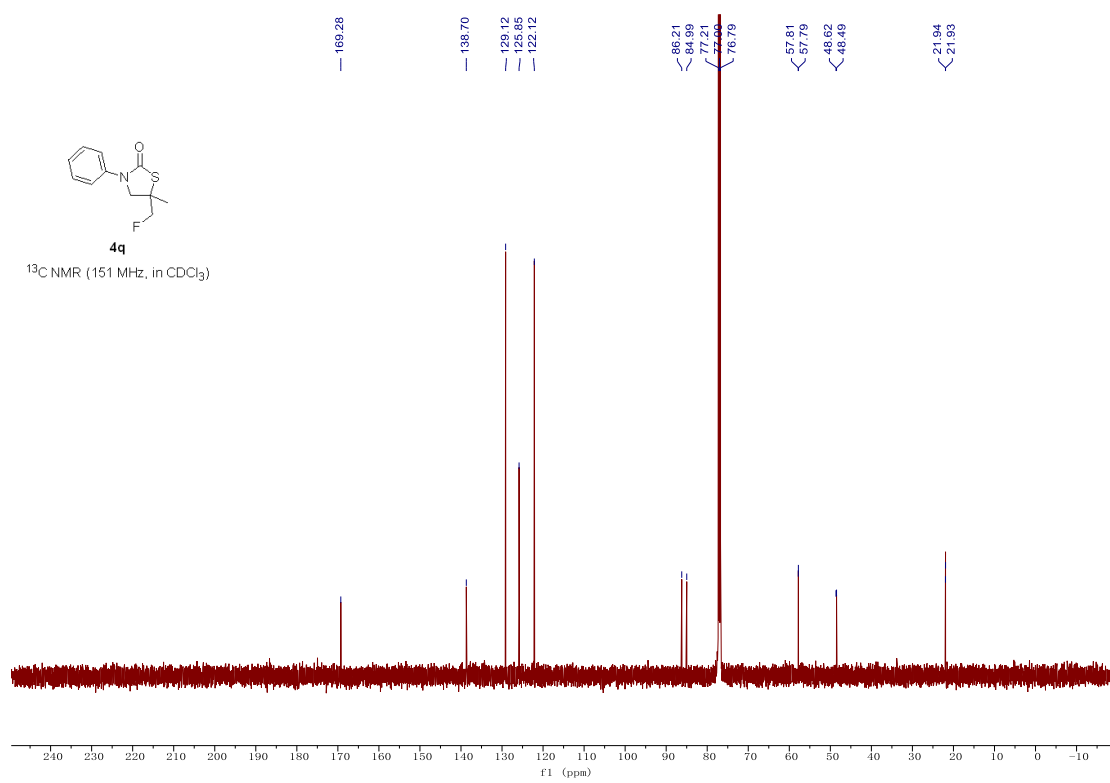

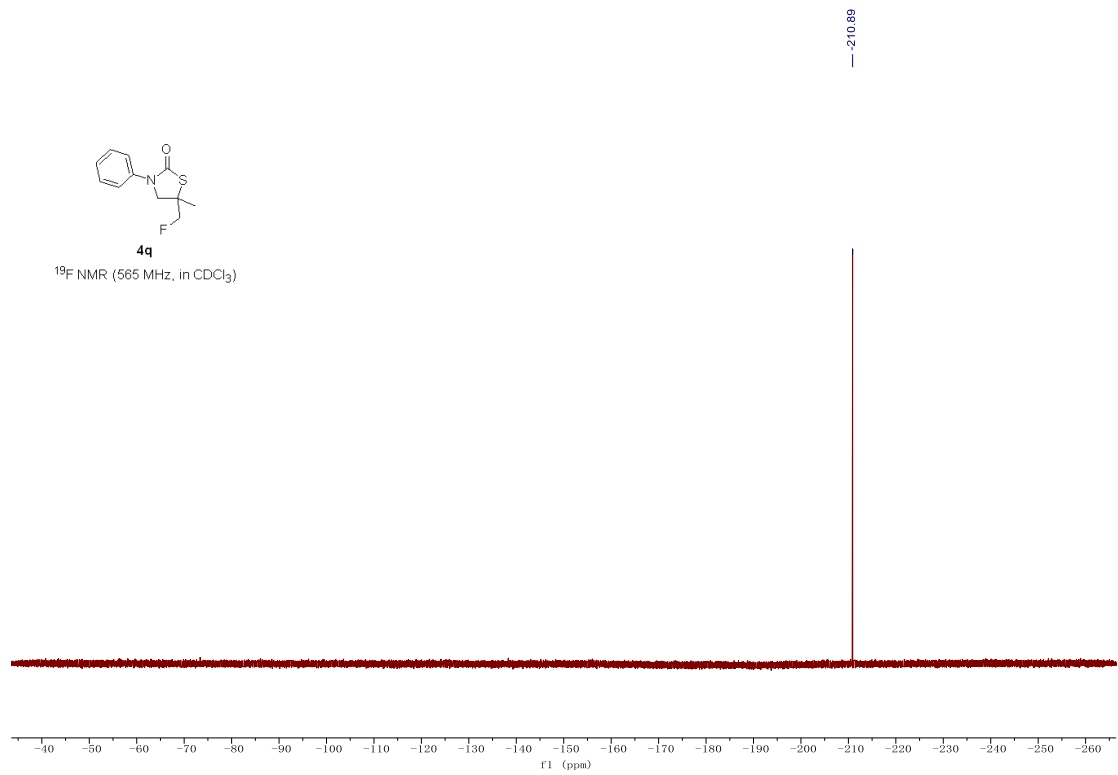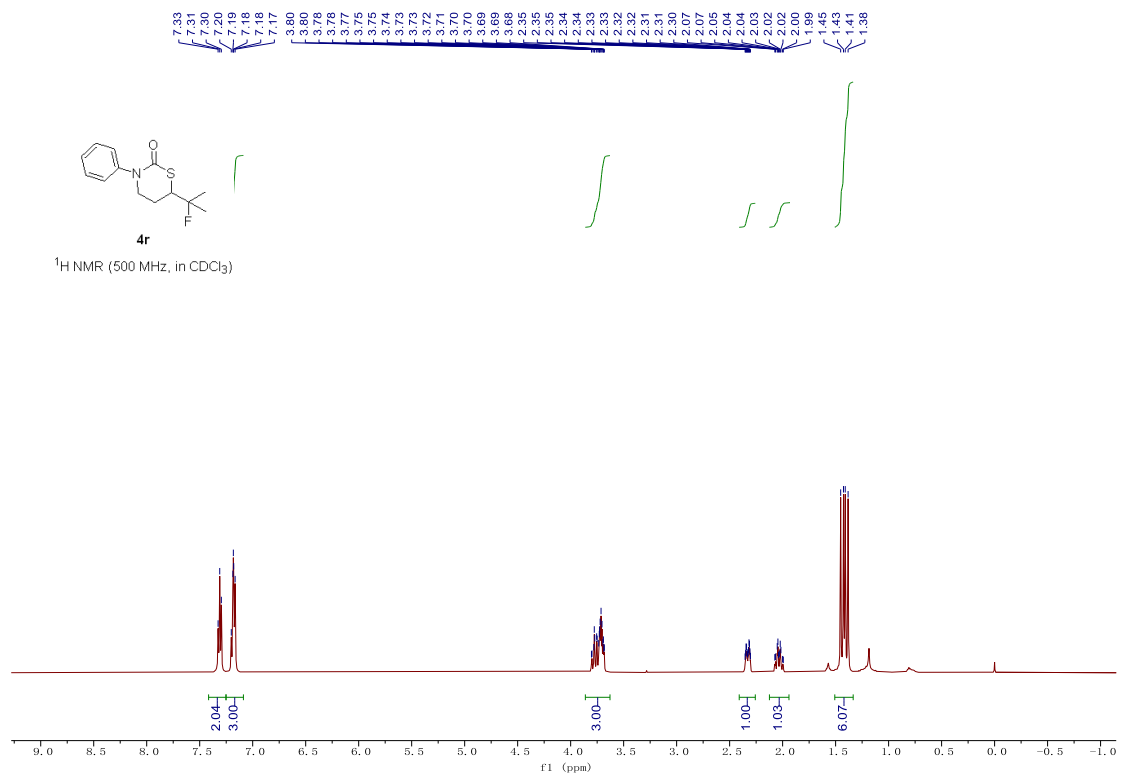

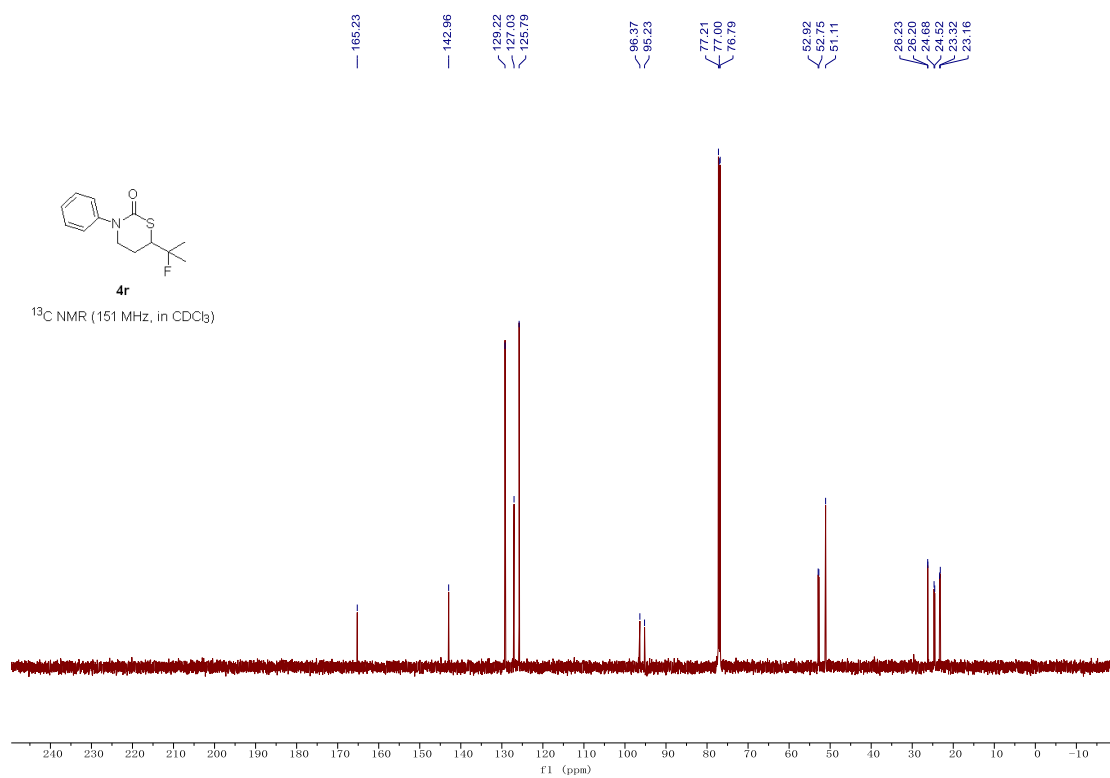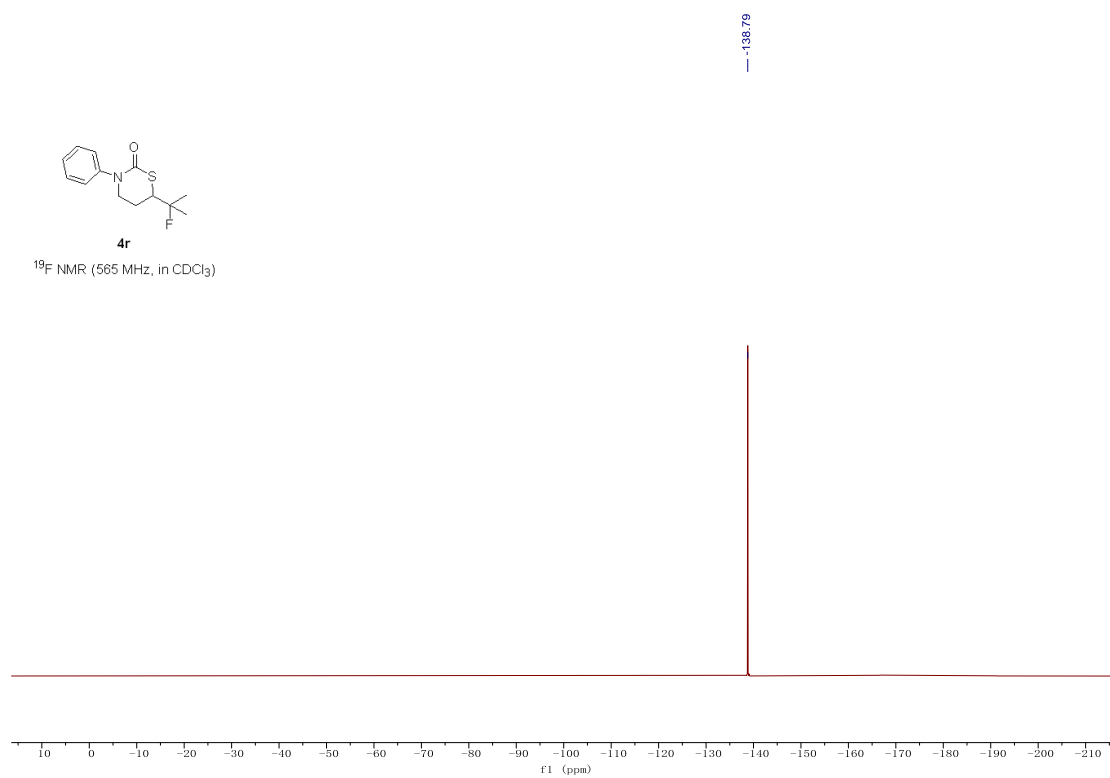

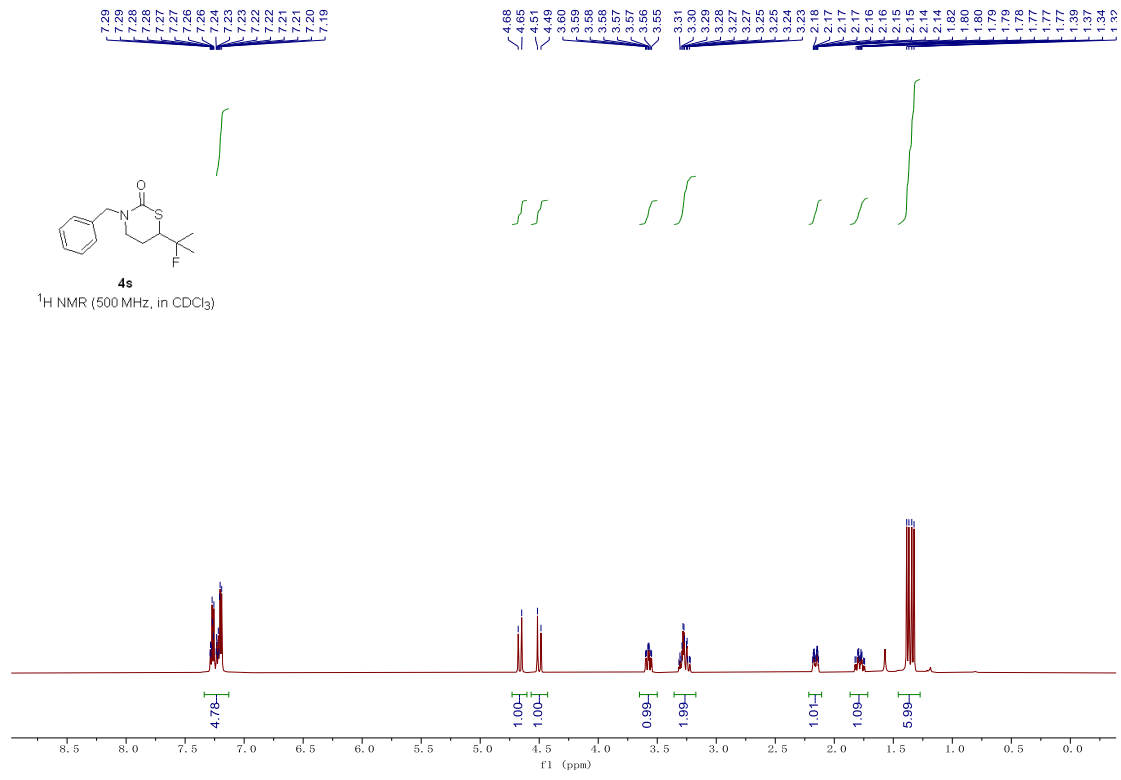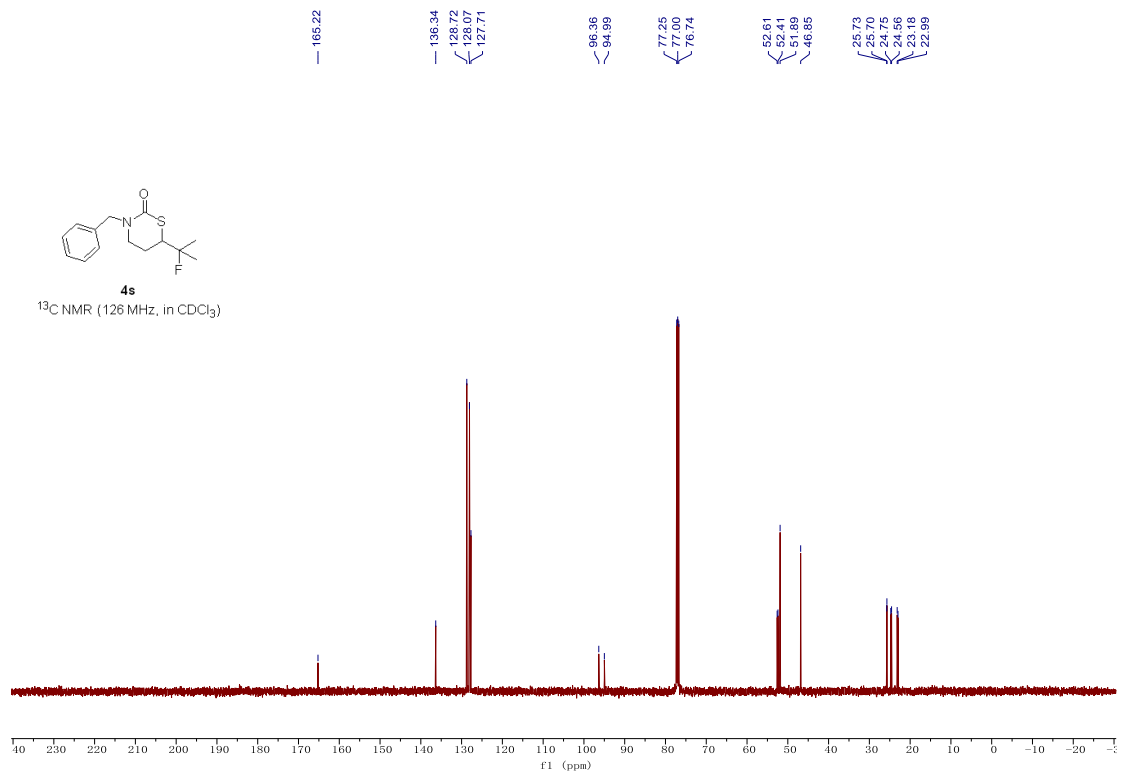



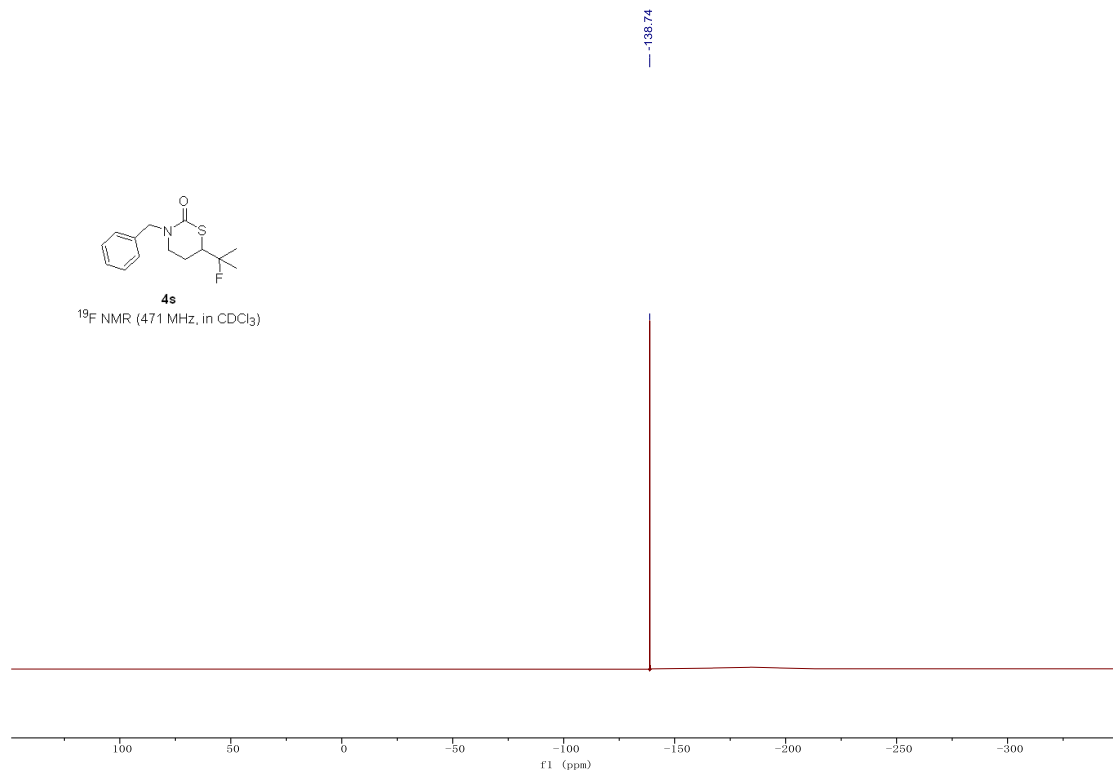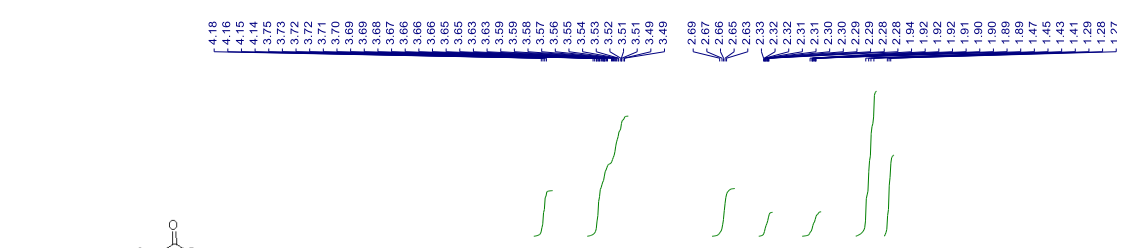

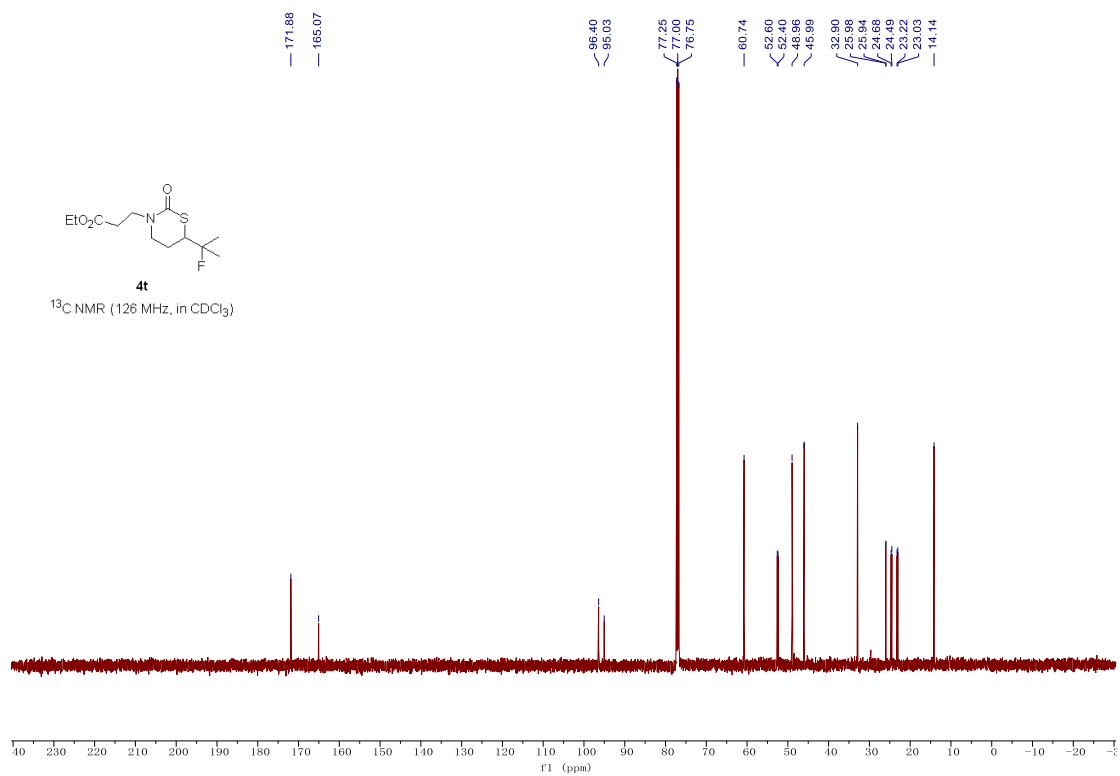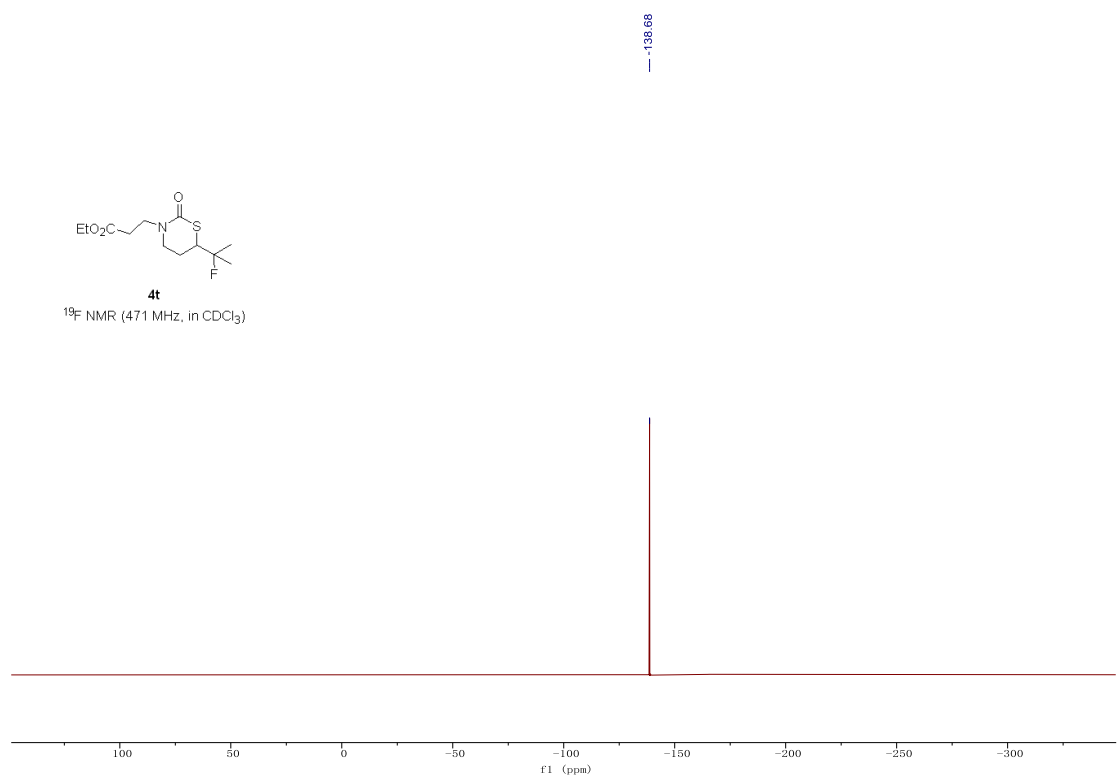

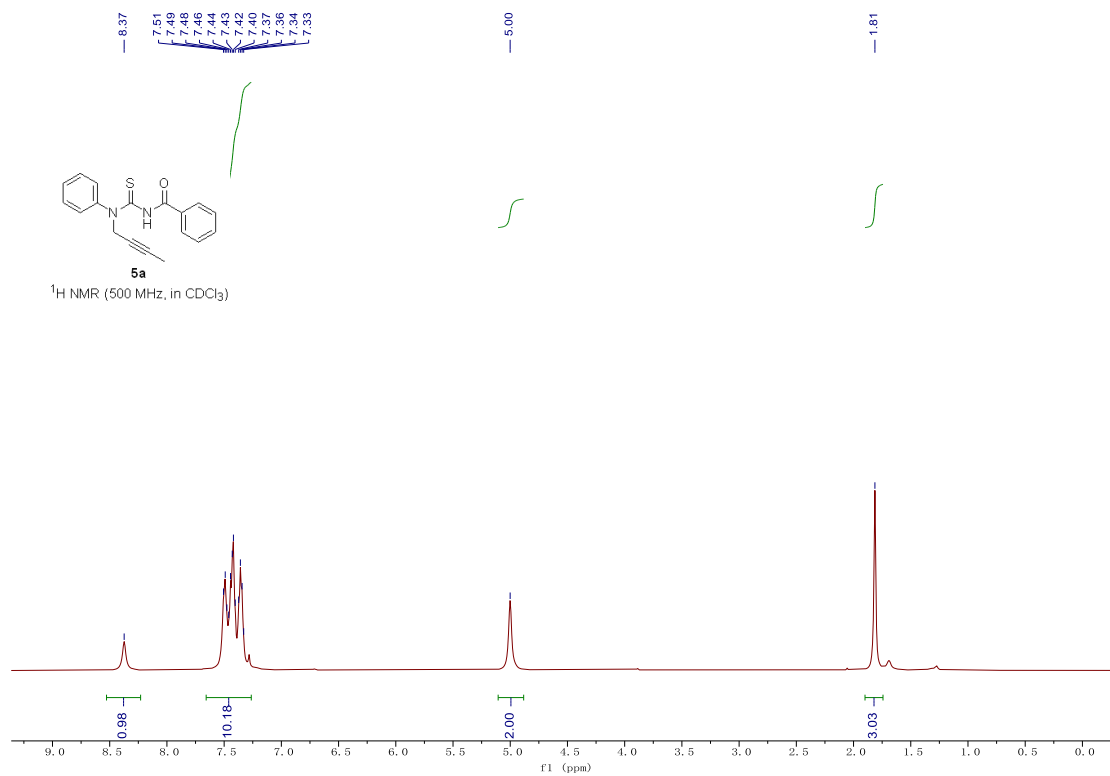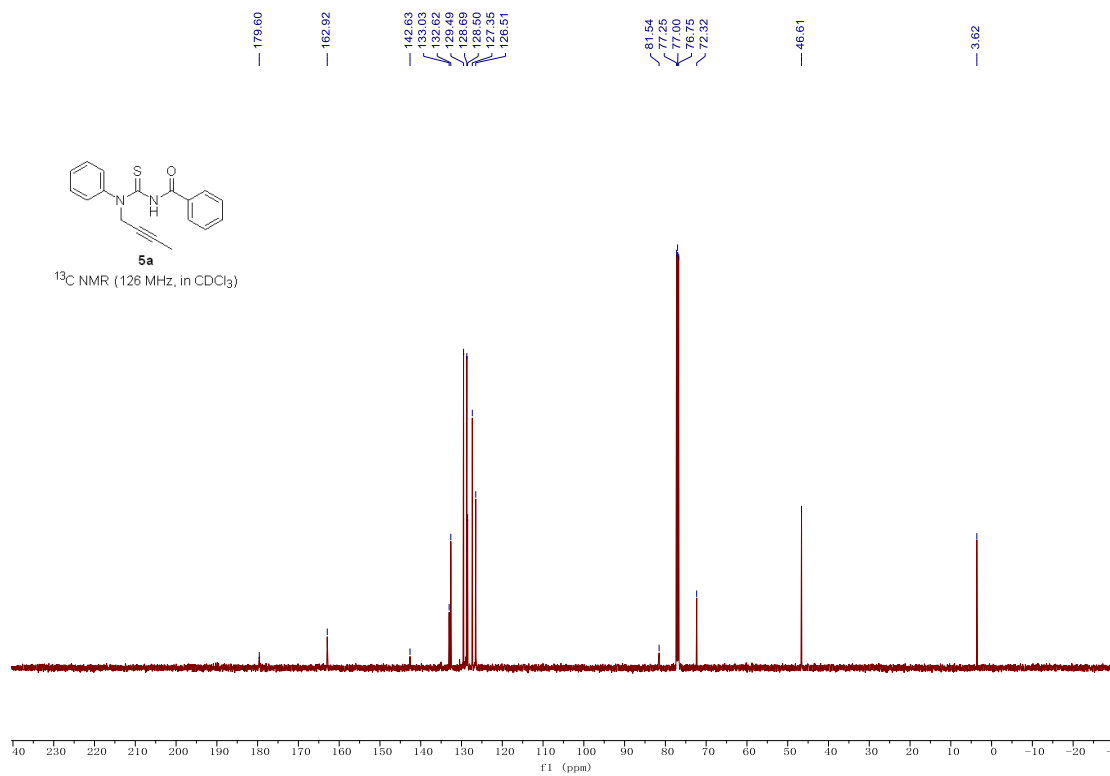

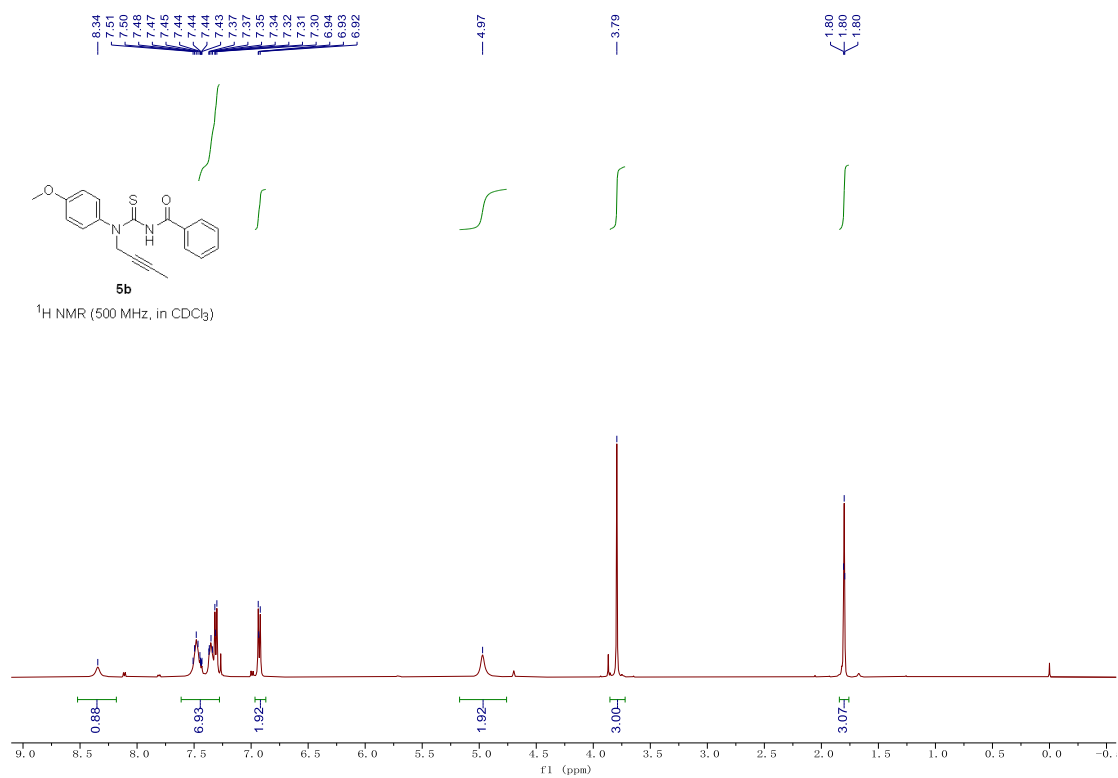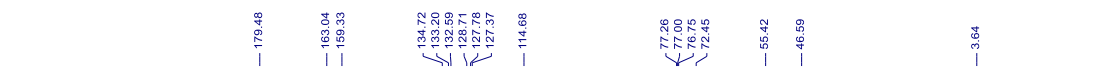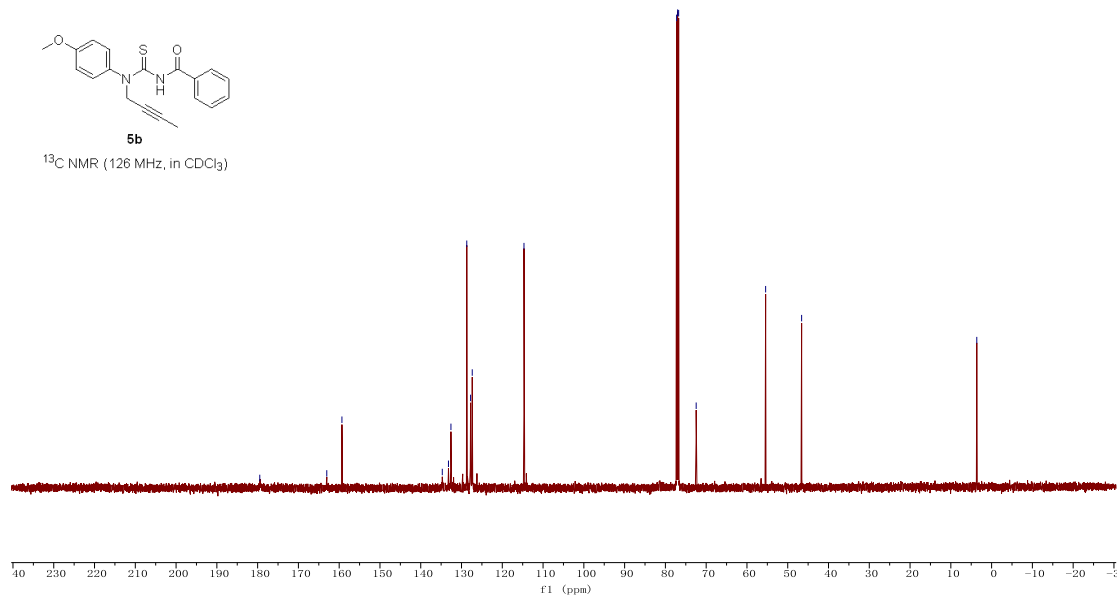

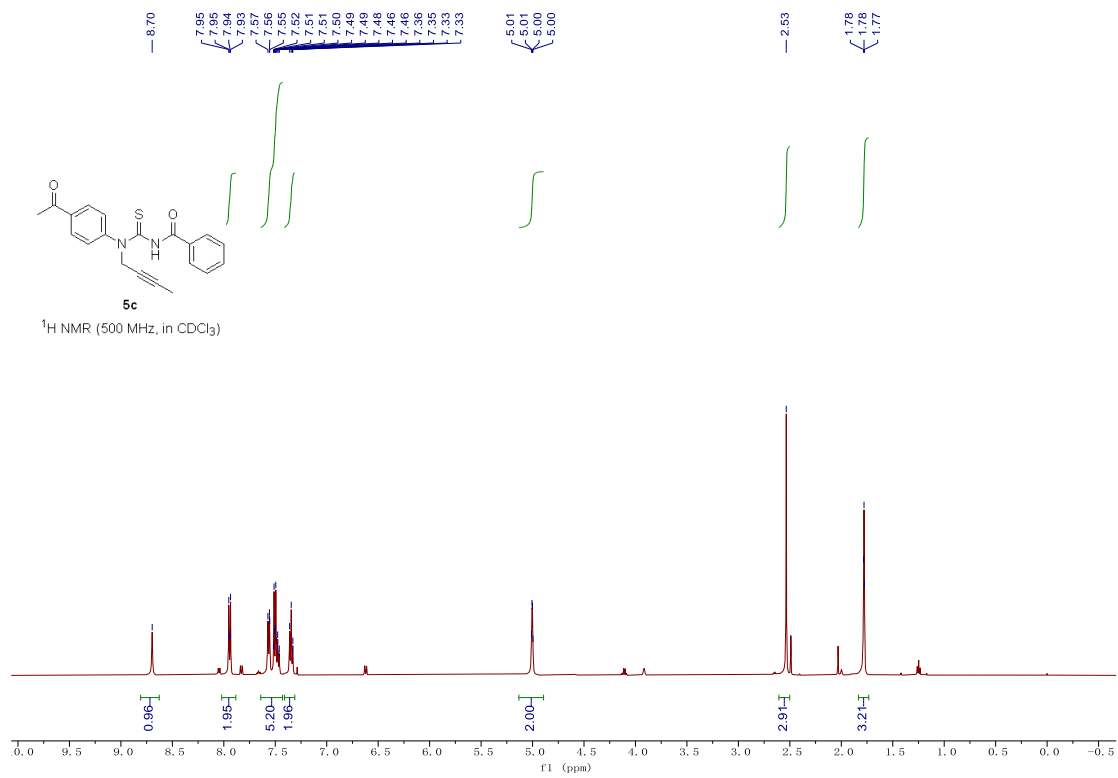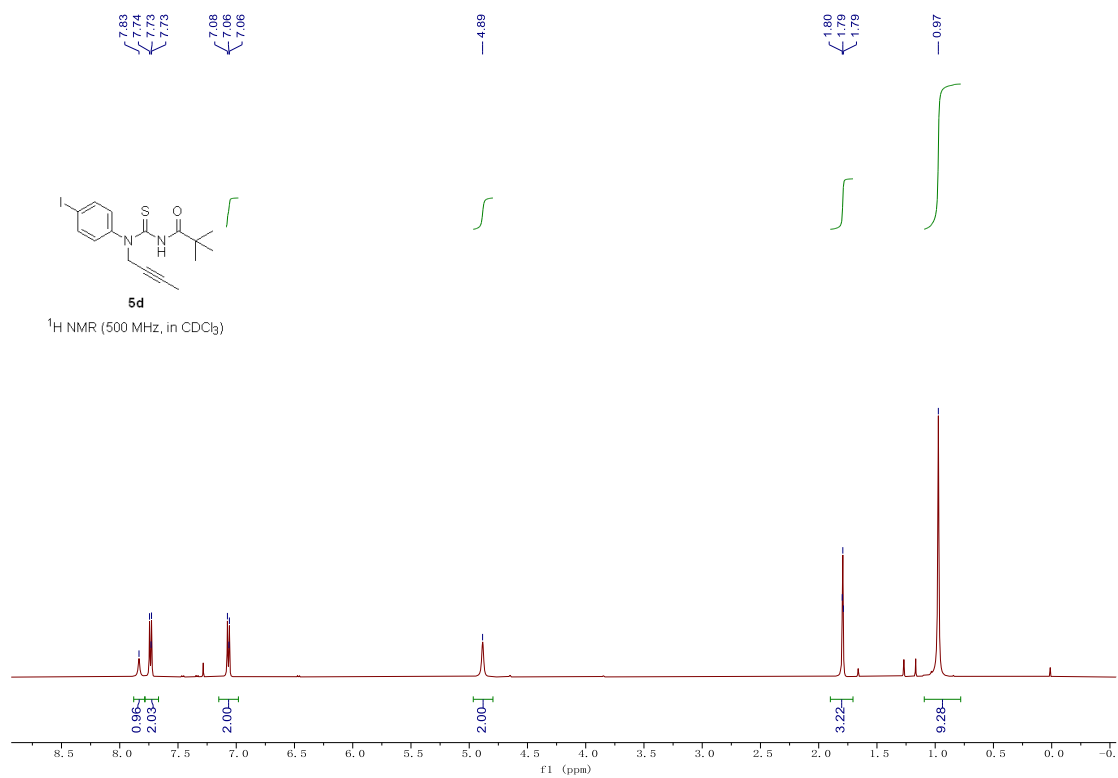

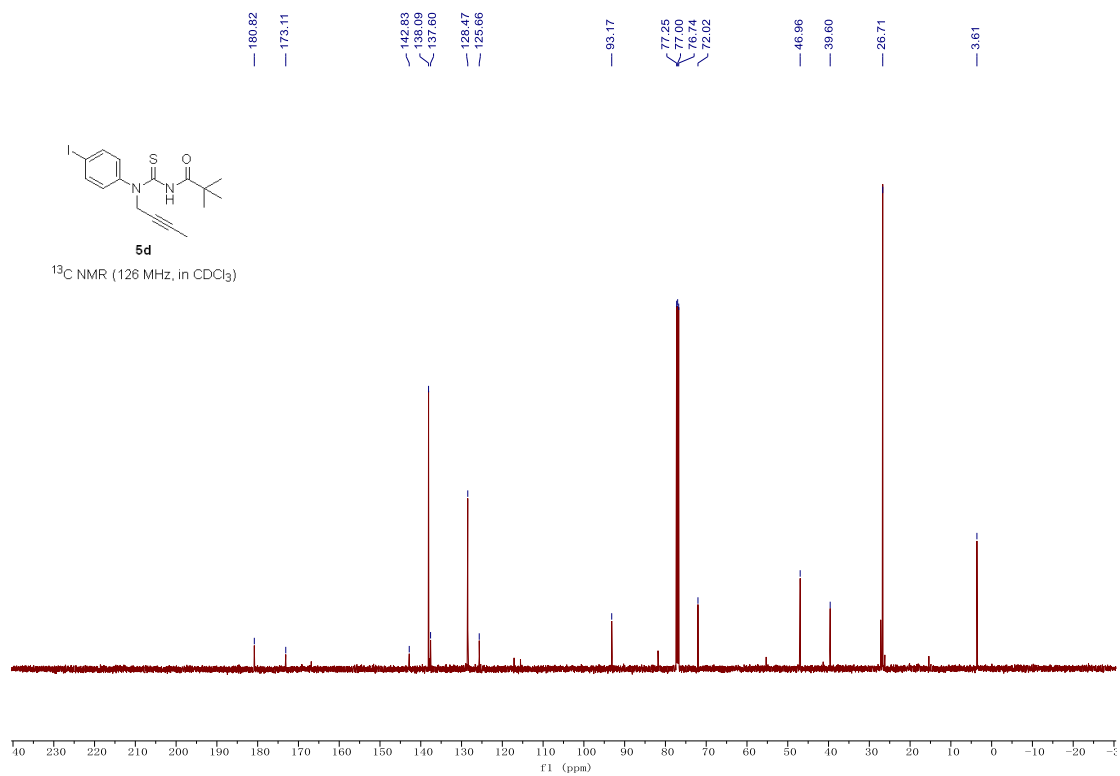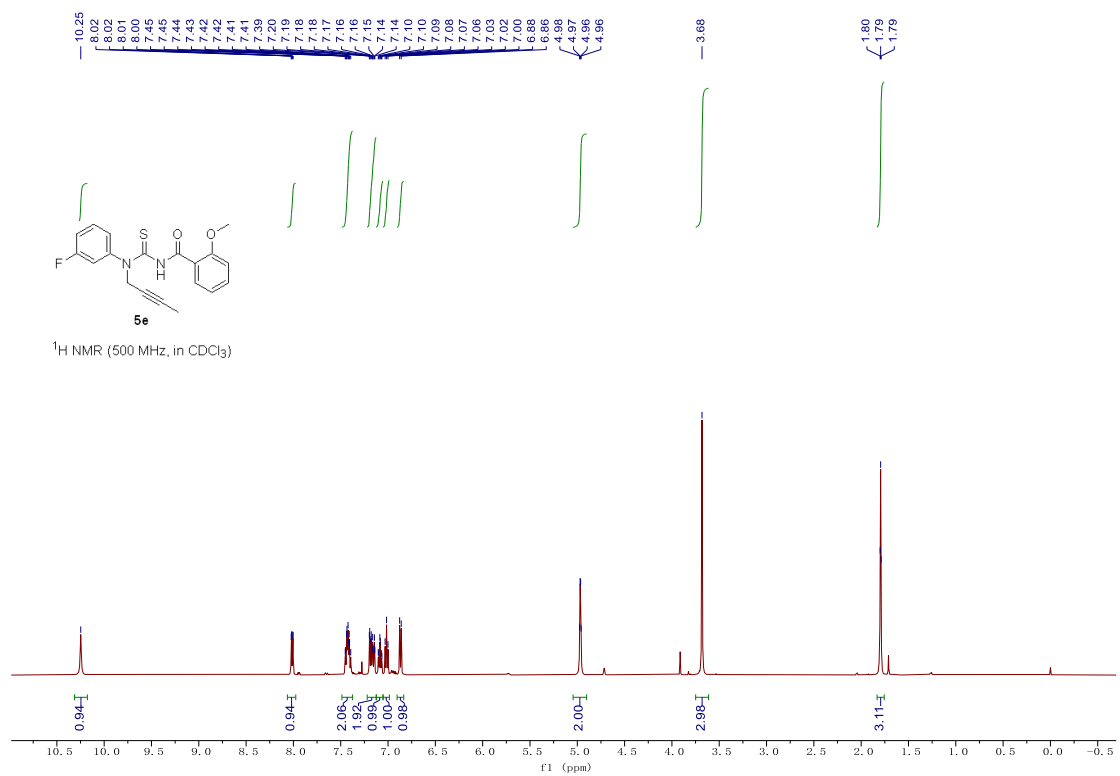

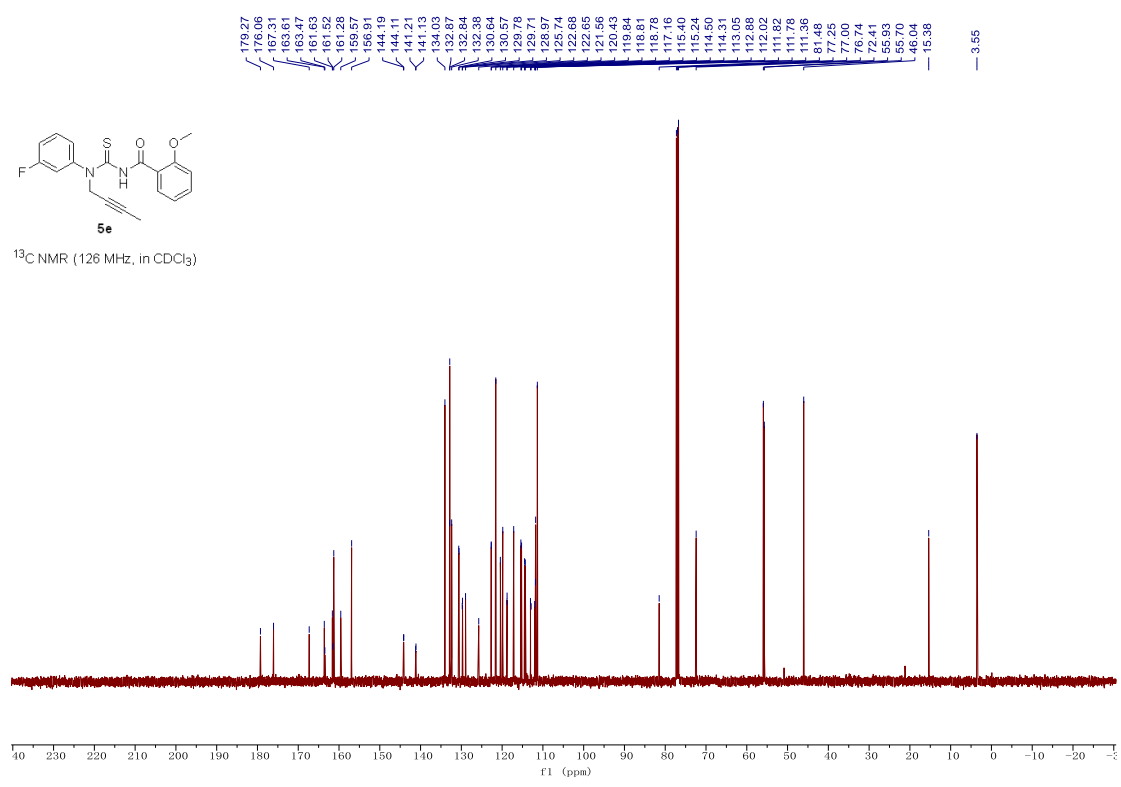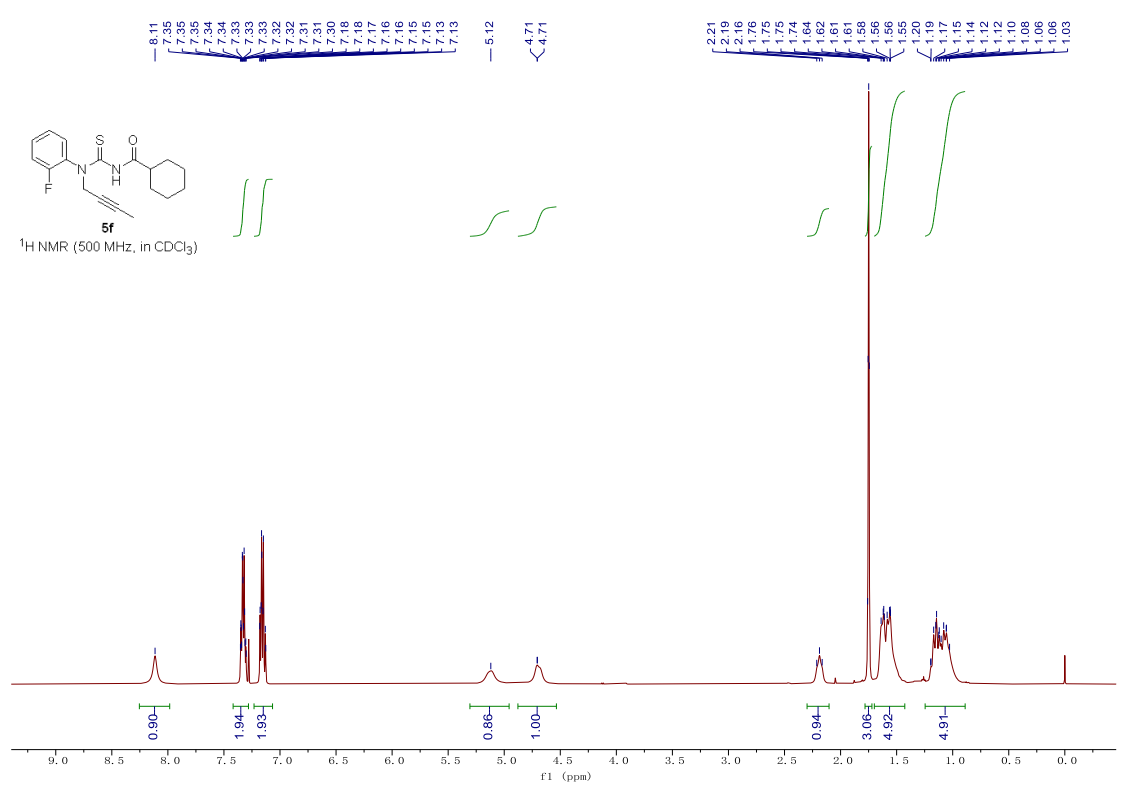

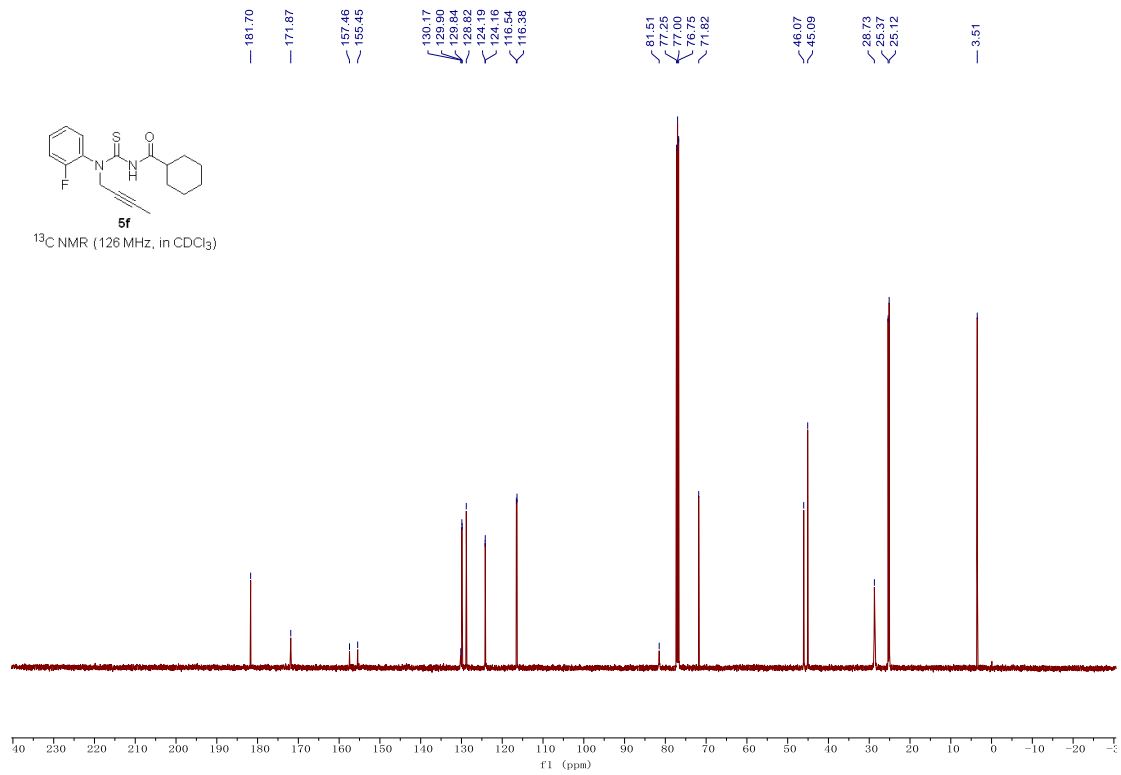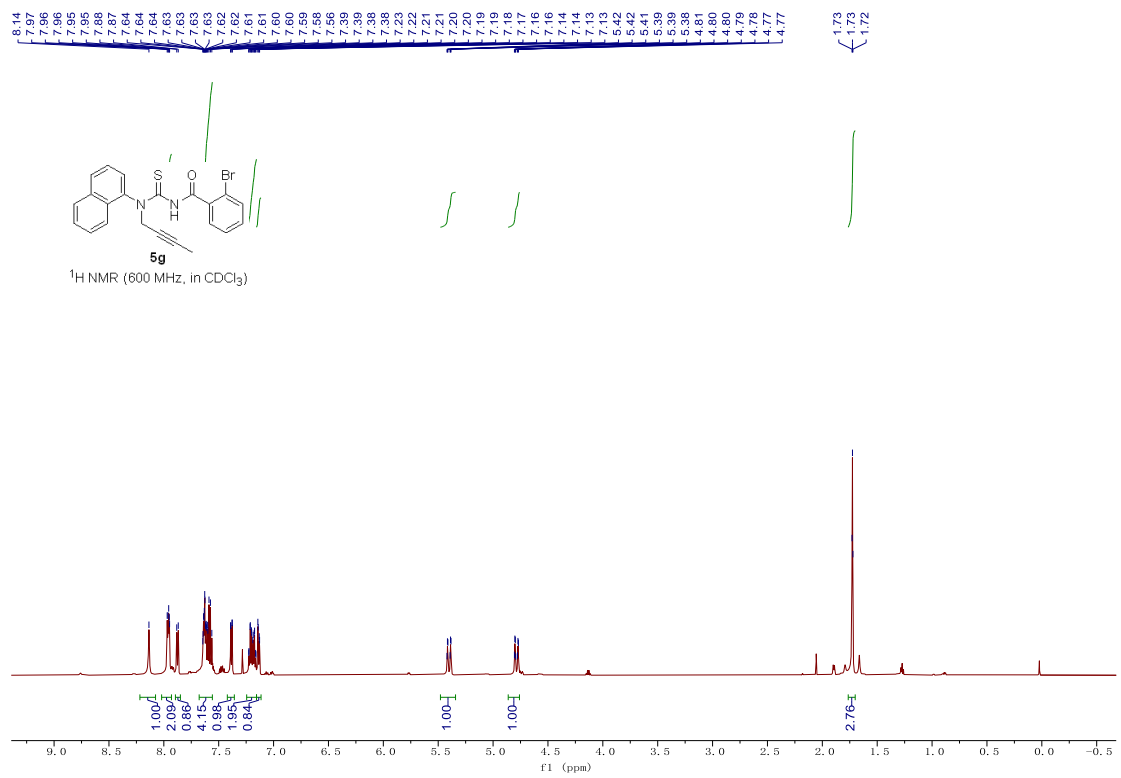



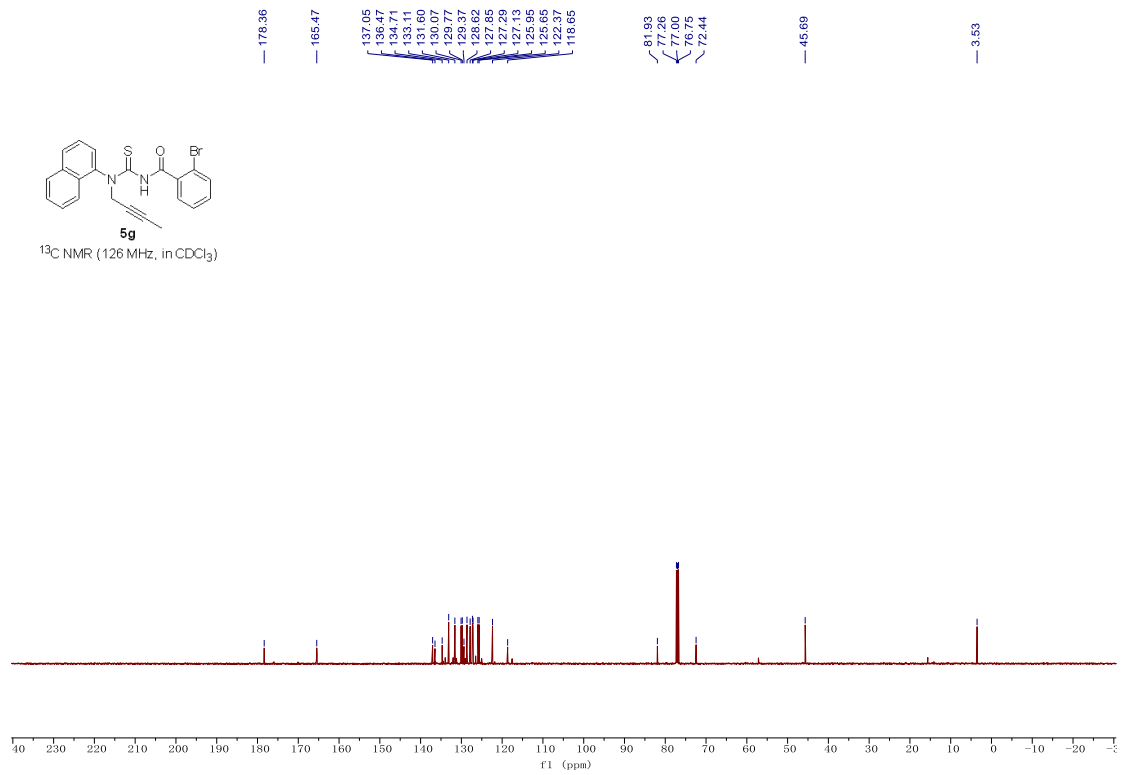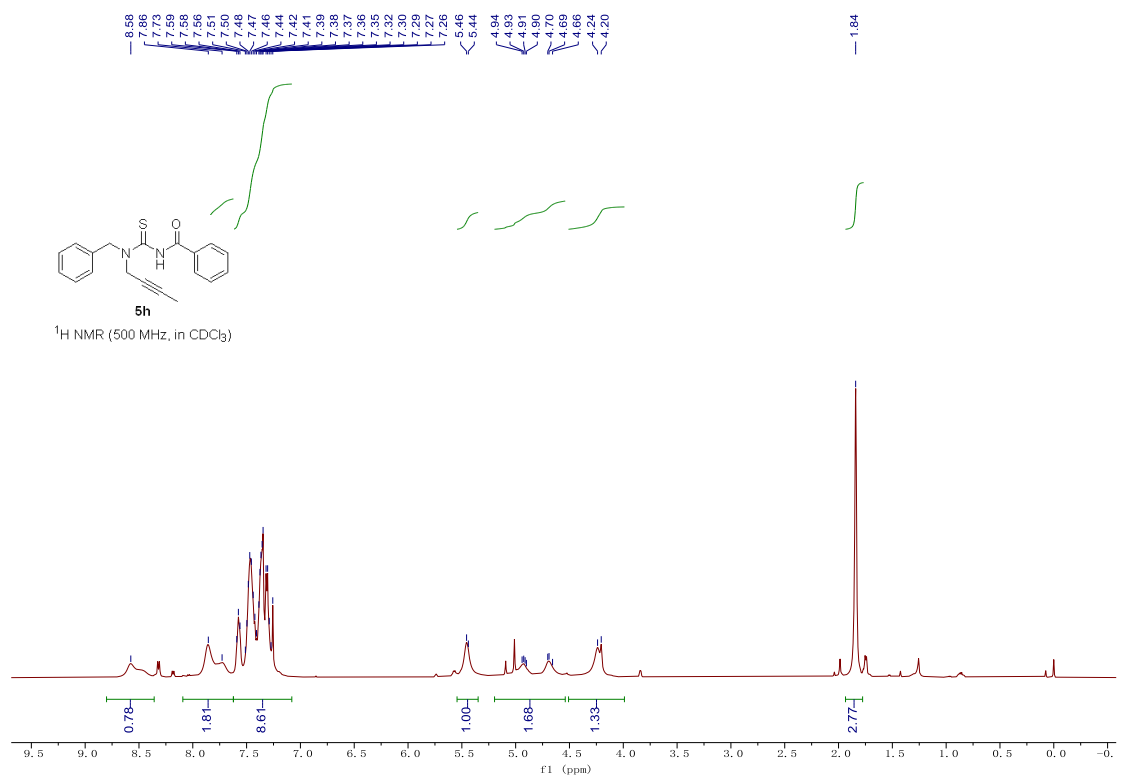

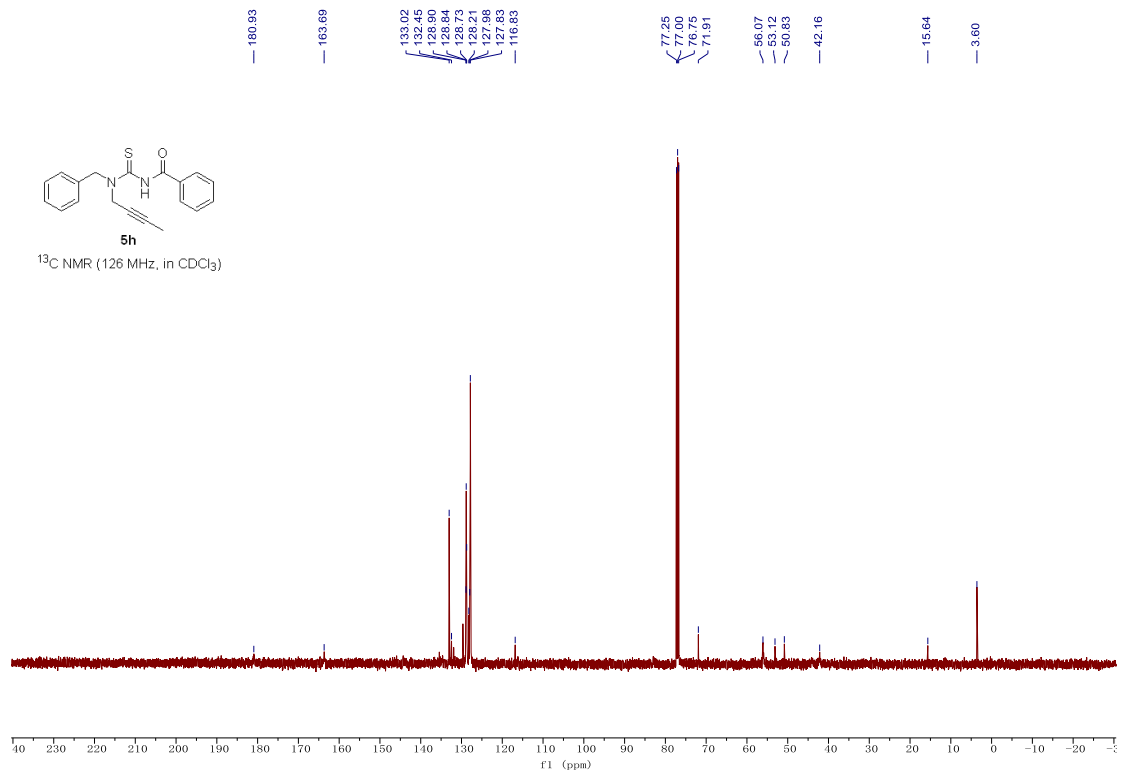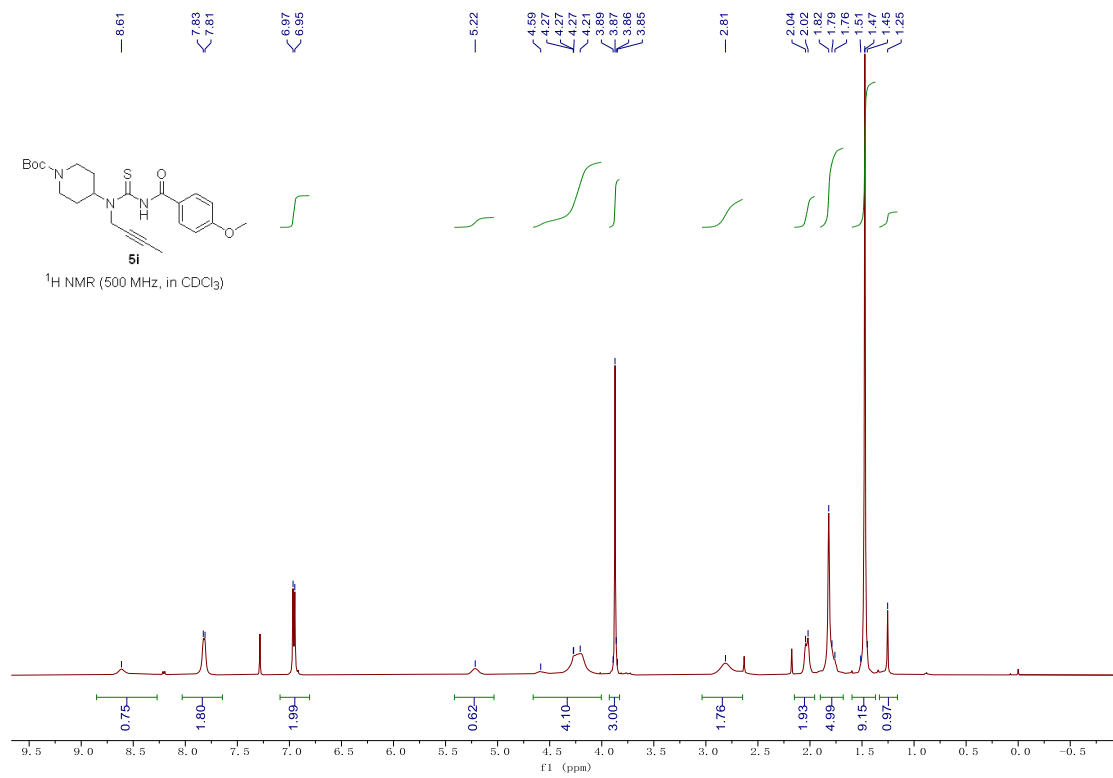

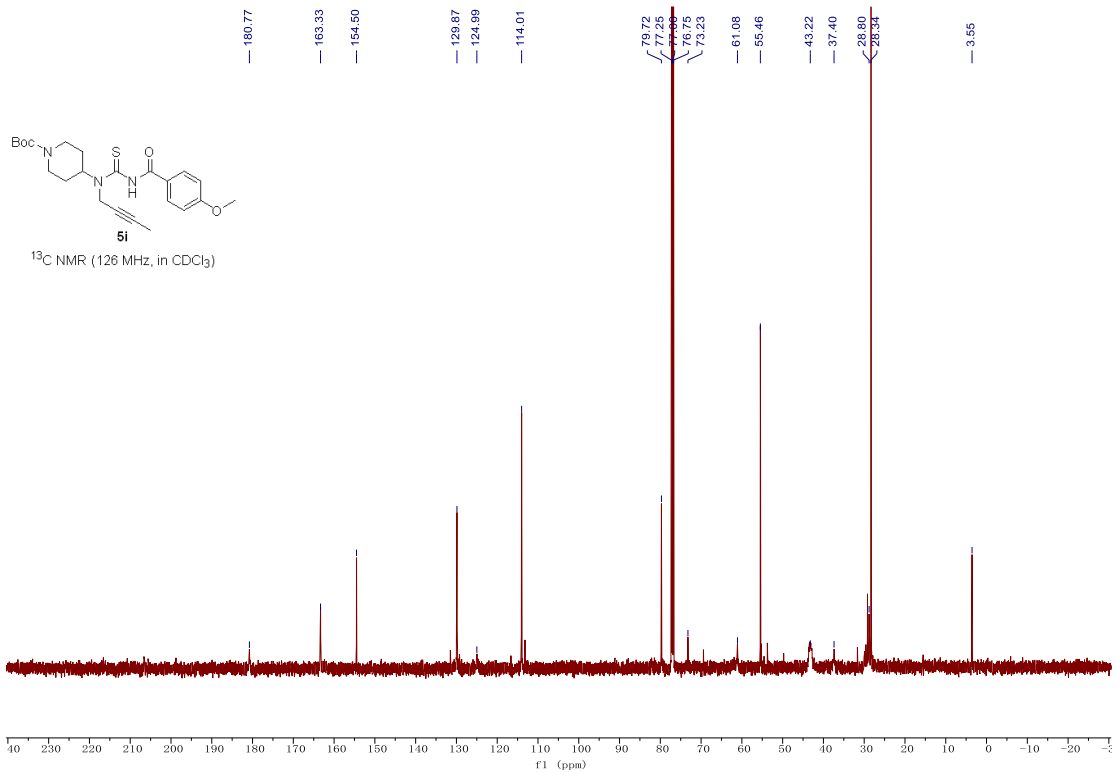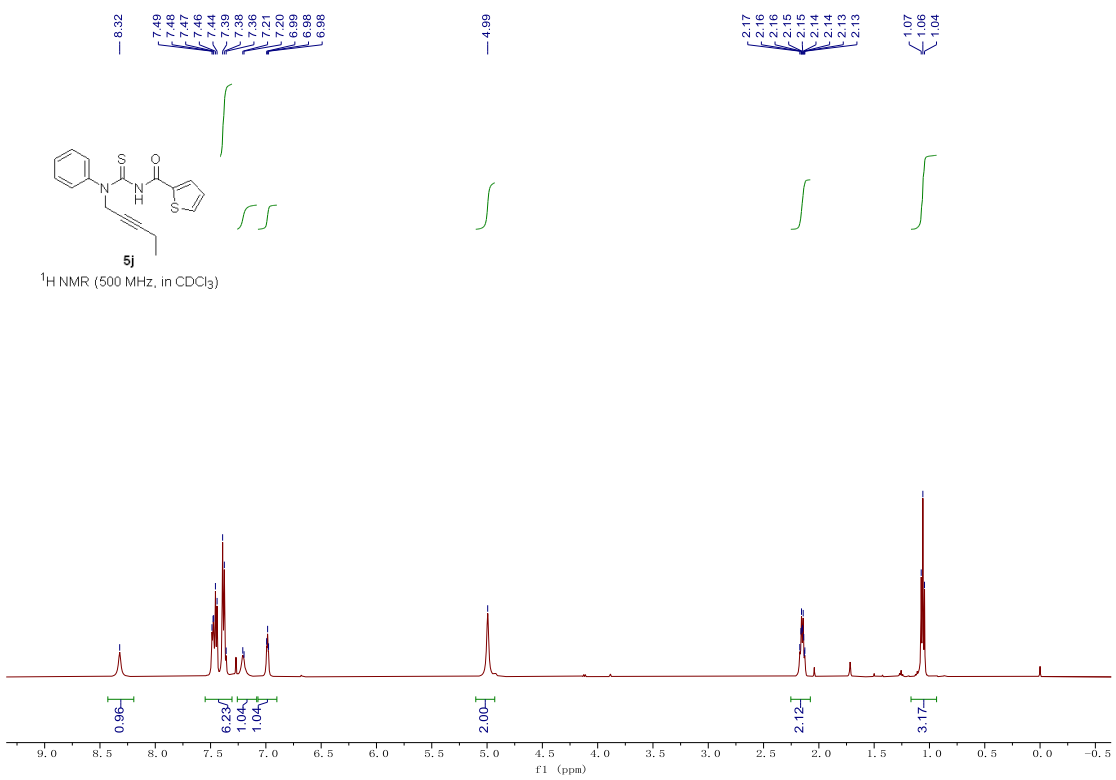

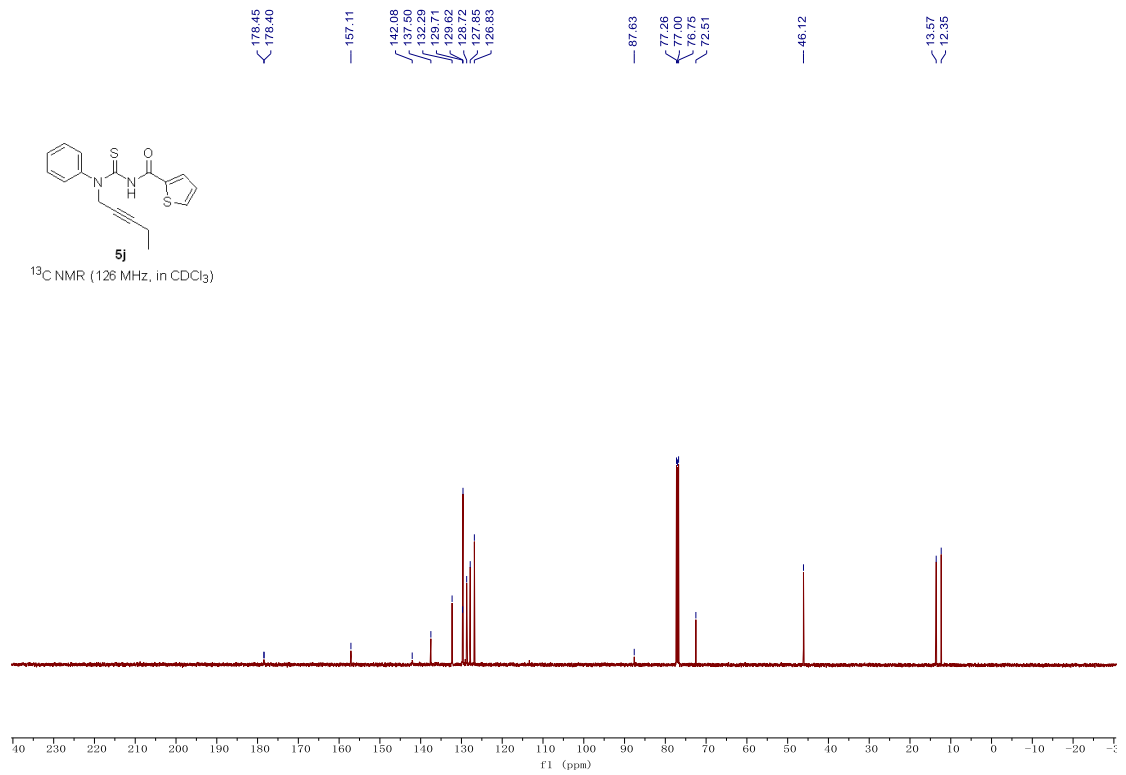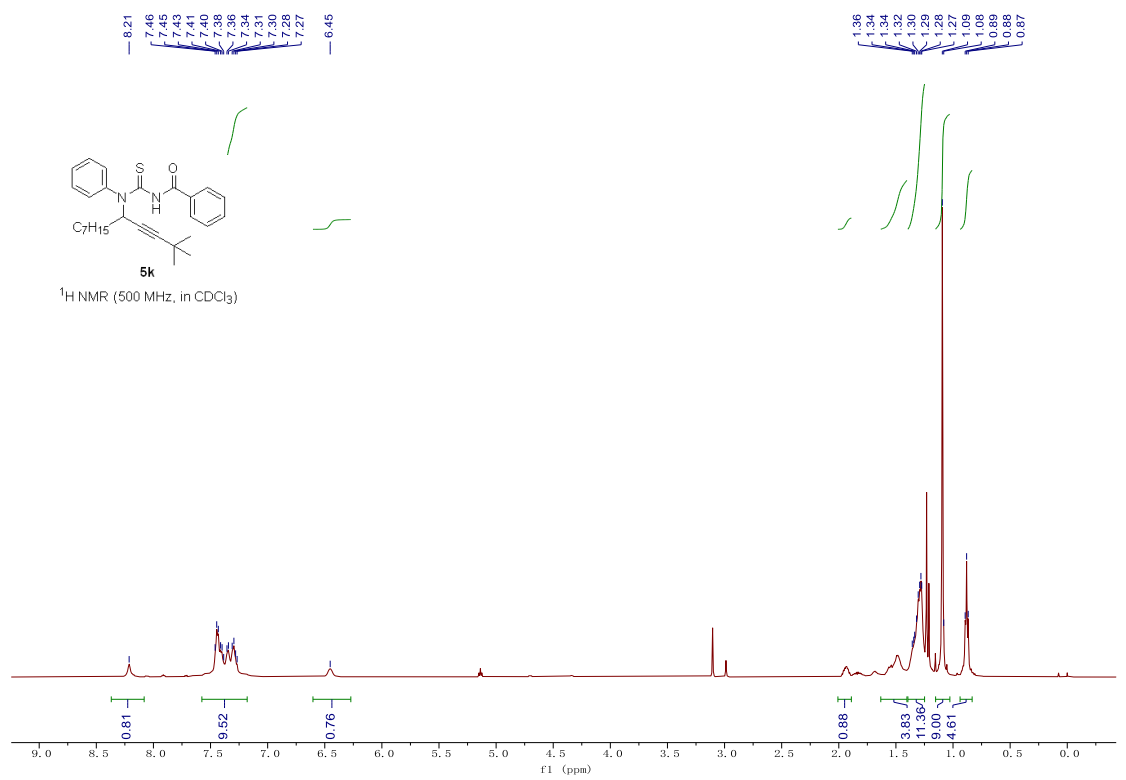

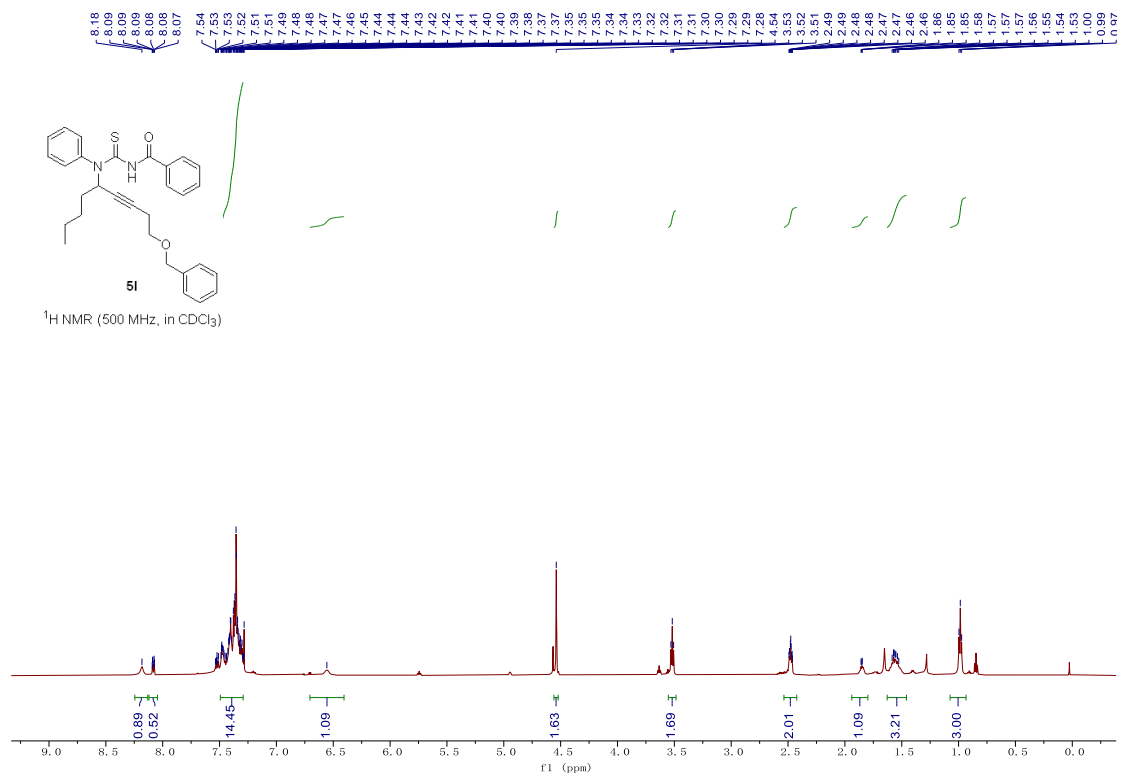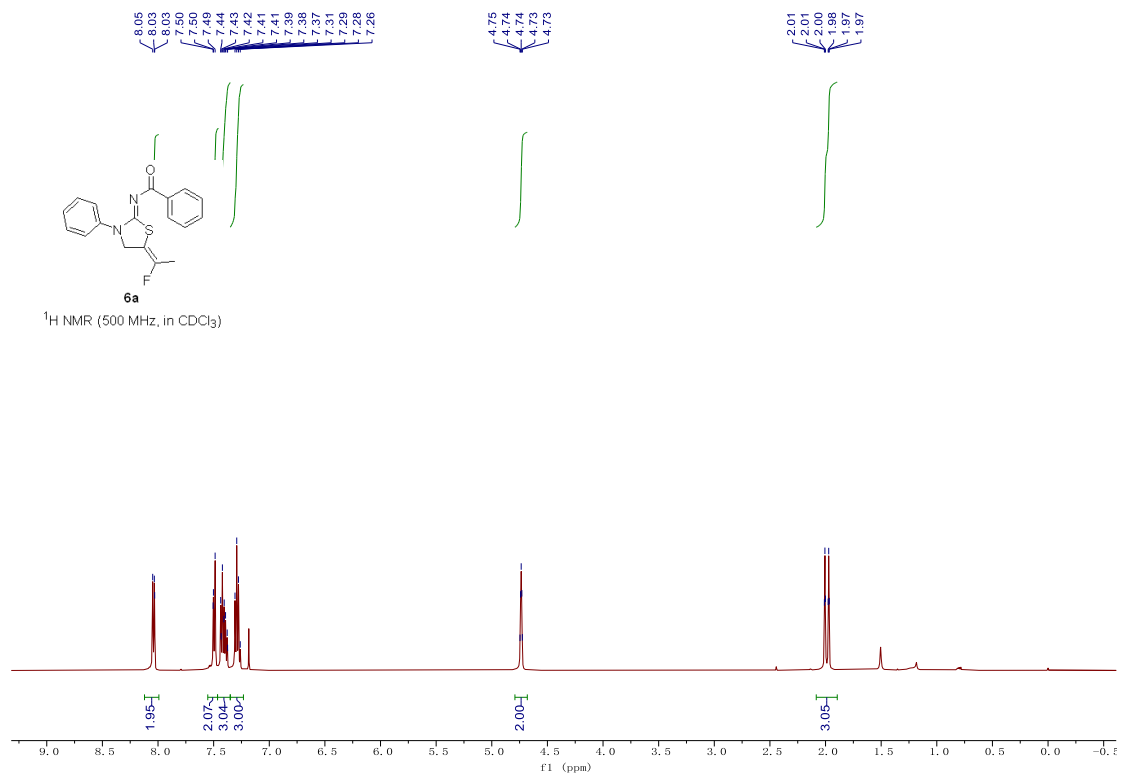

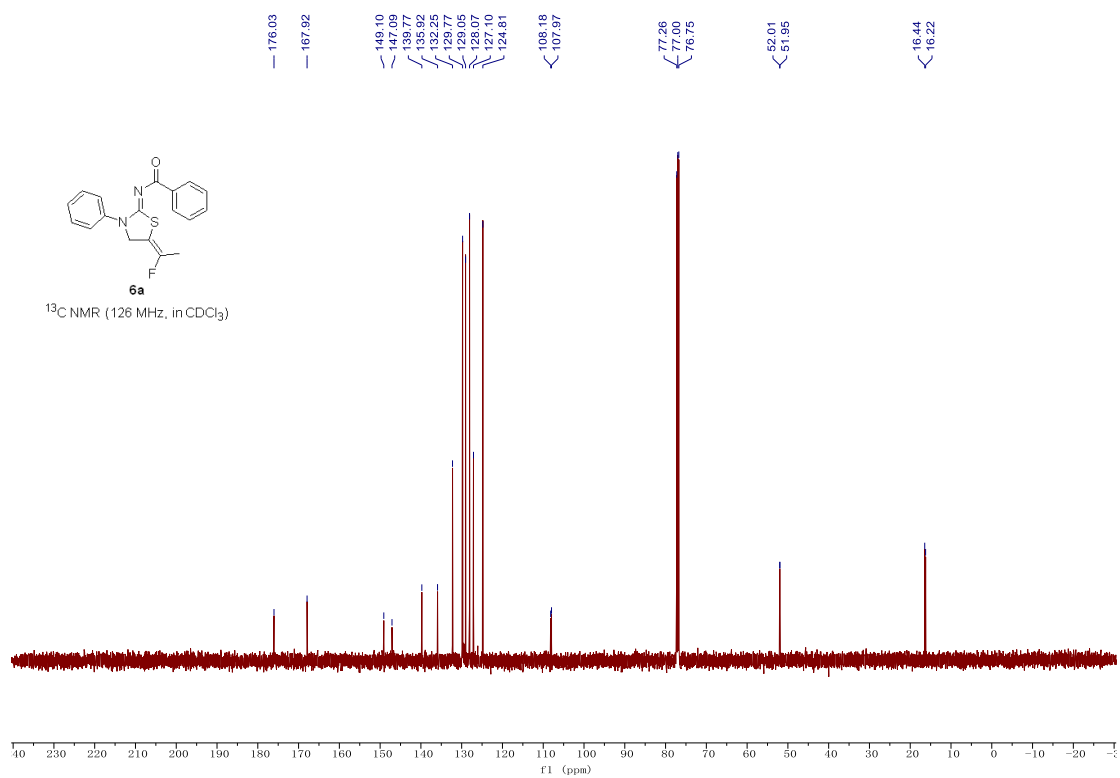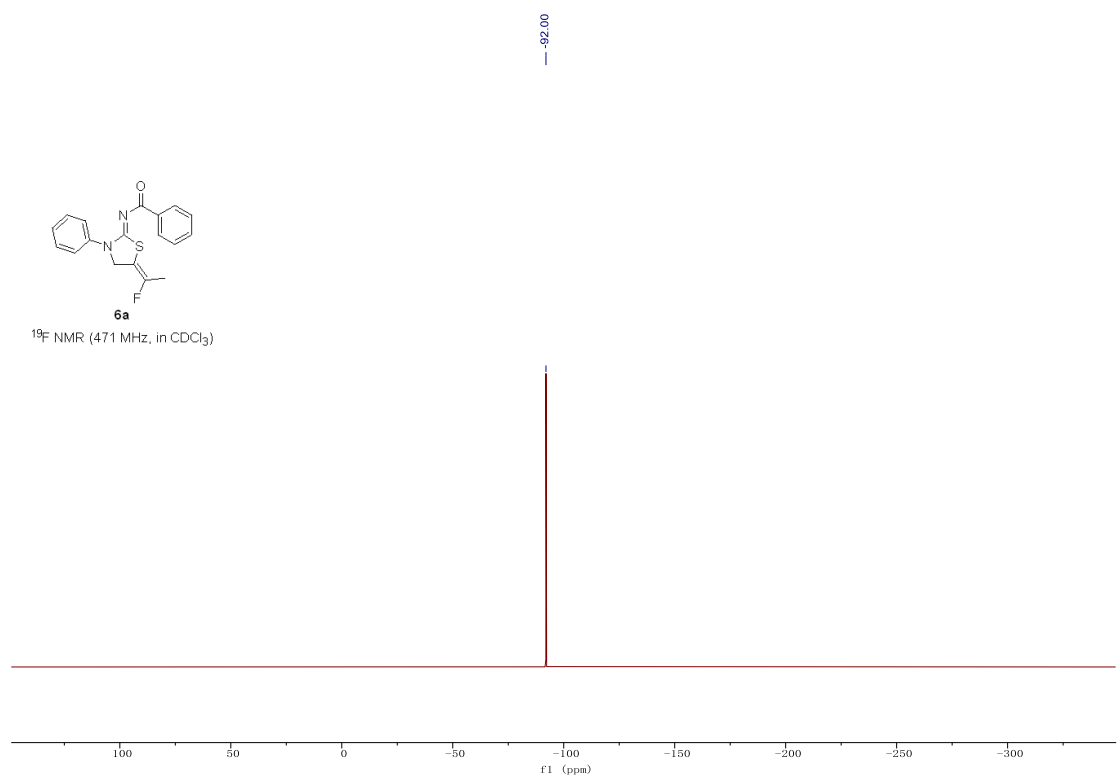

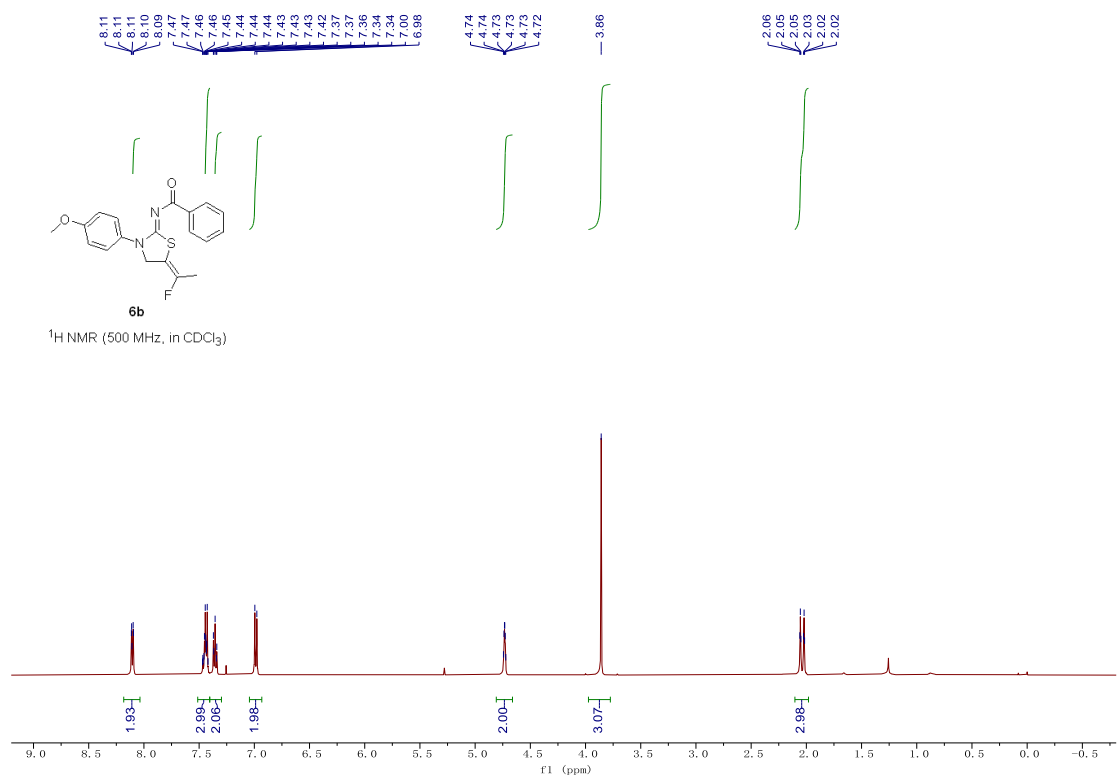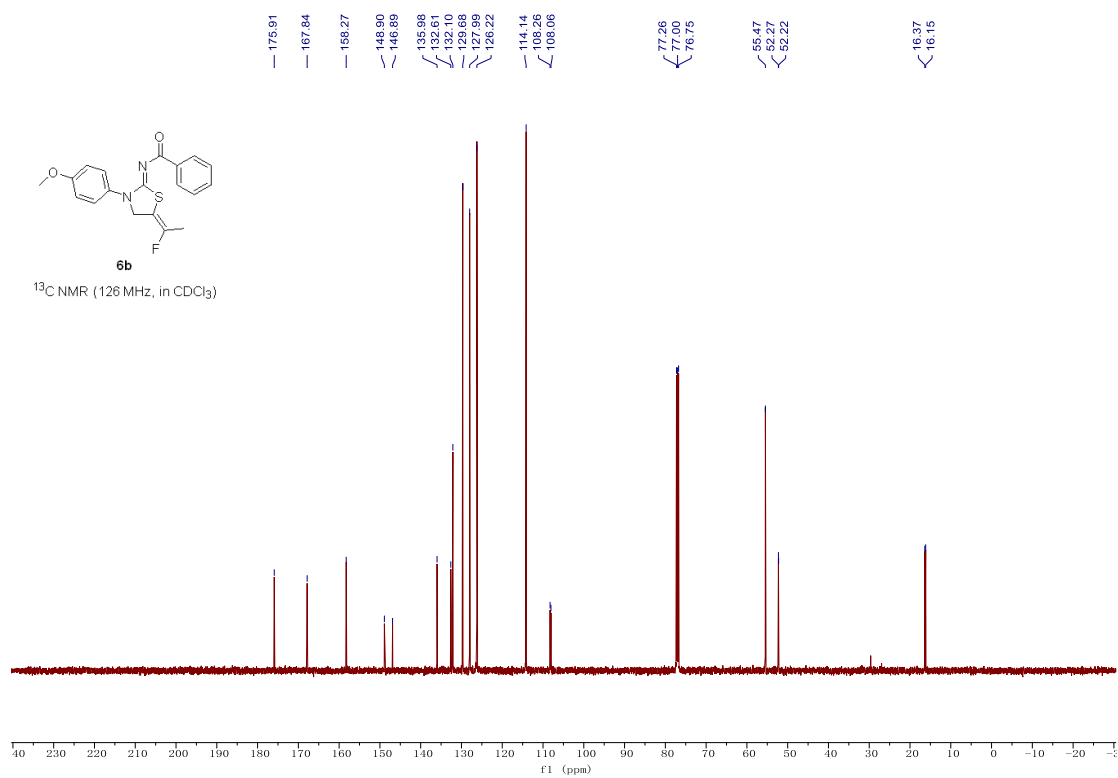

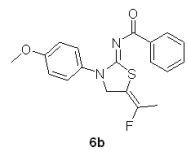

<sup>19</sup>F NMR (471 MHz, in CDCl<sub>3</sub>)

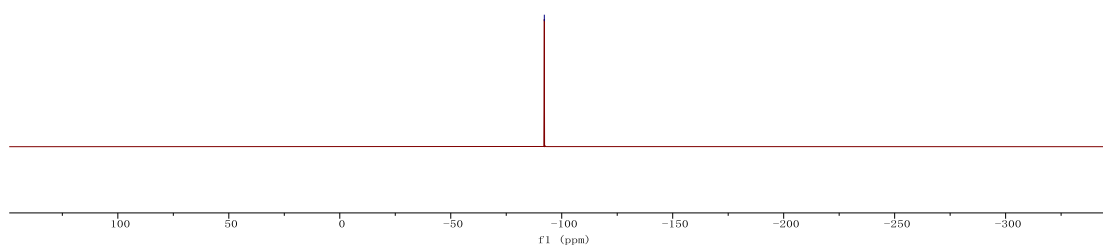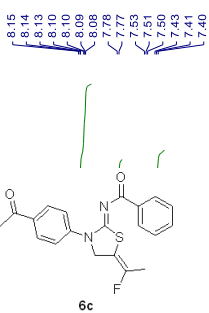

<sup>1</sup>H NMR (500 MHz, in CDCl<sub>3</sub>)

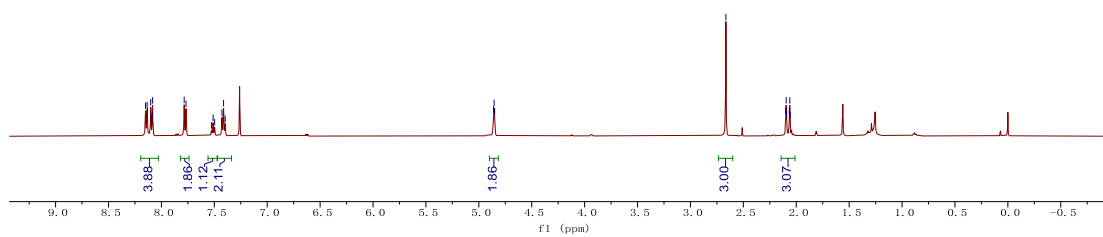



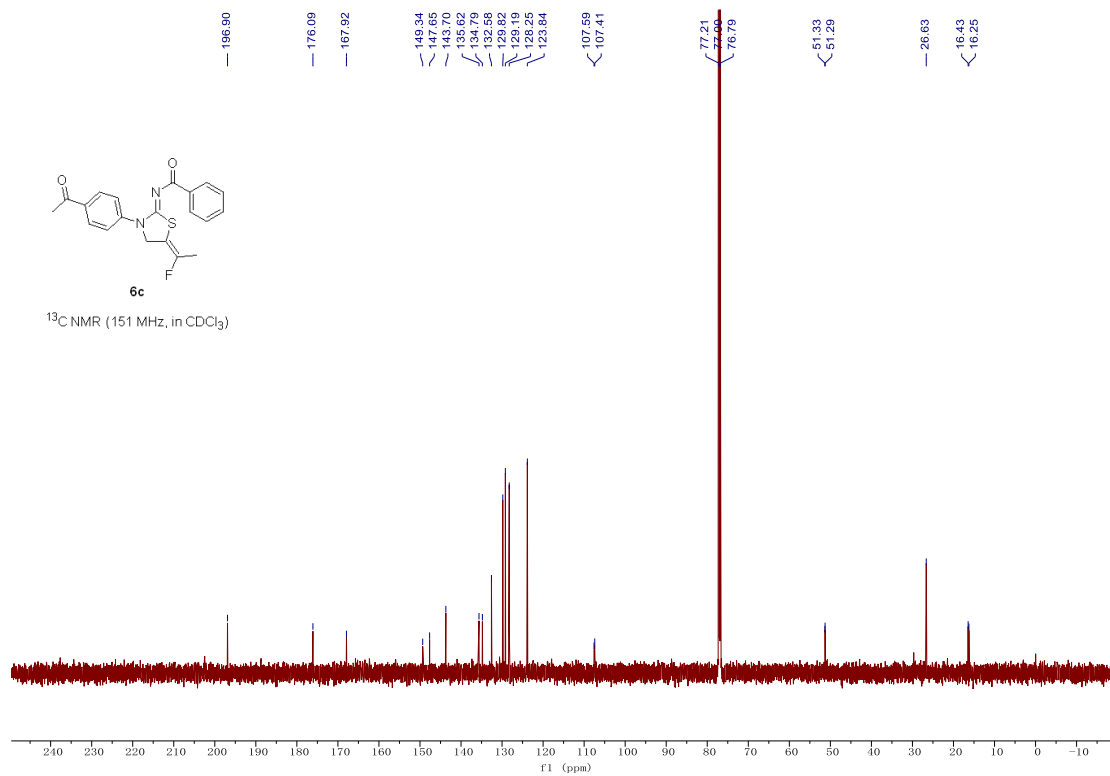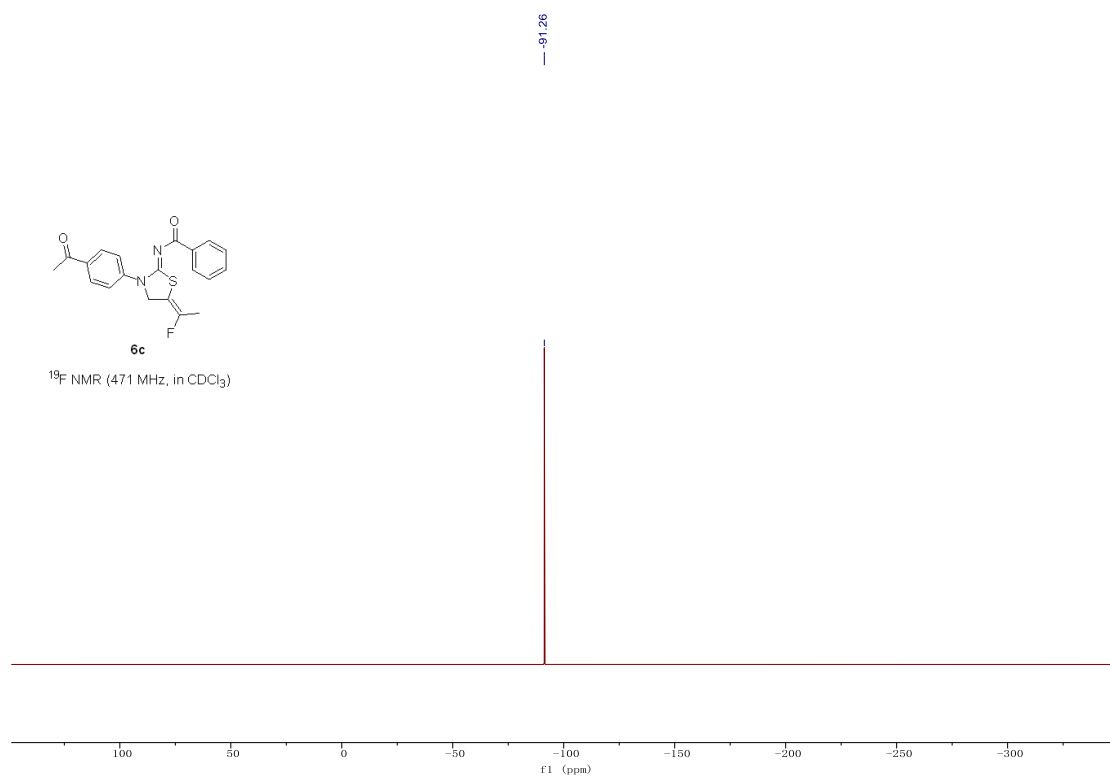

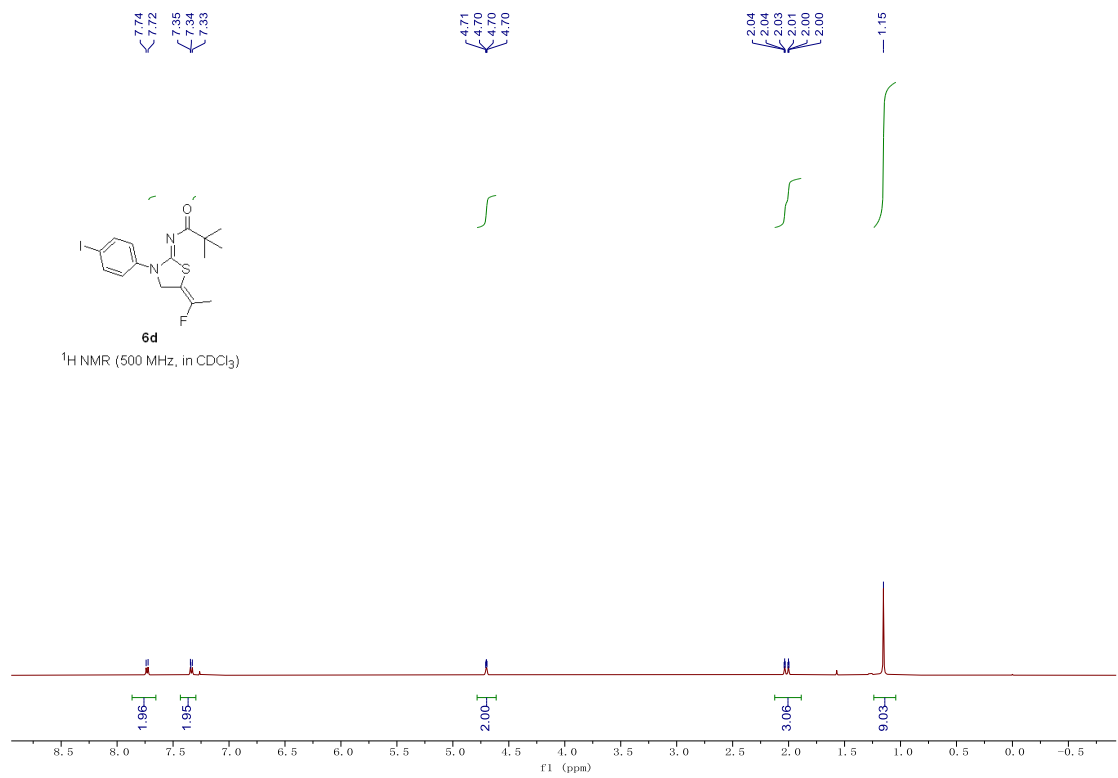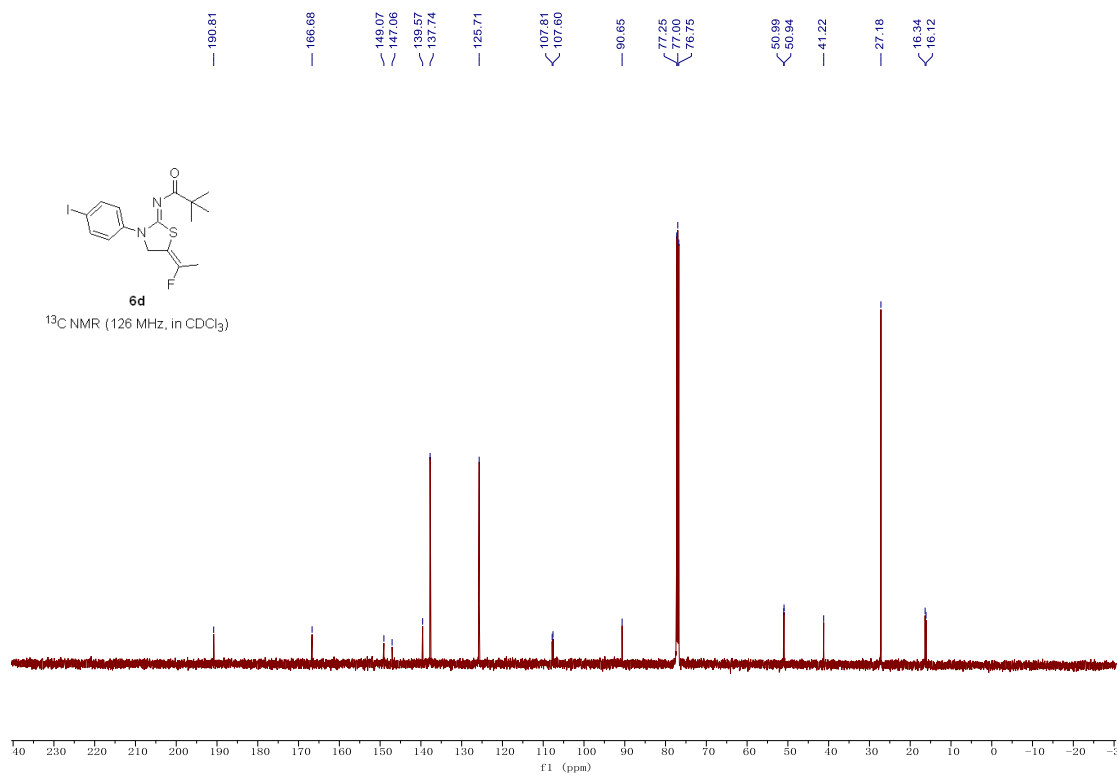

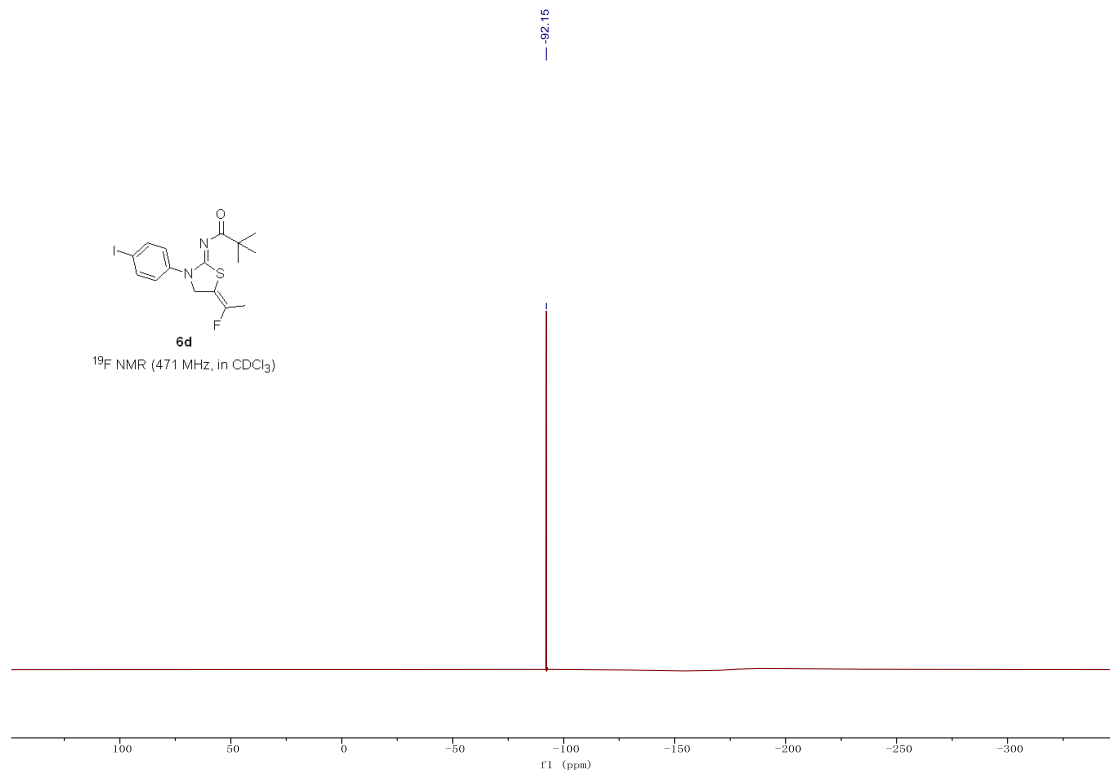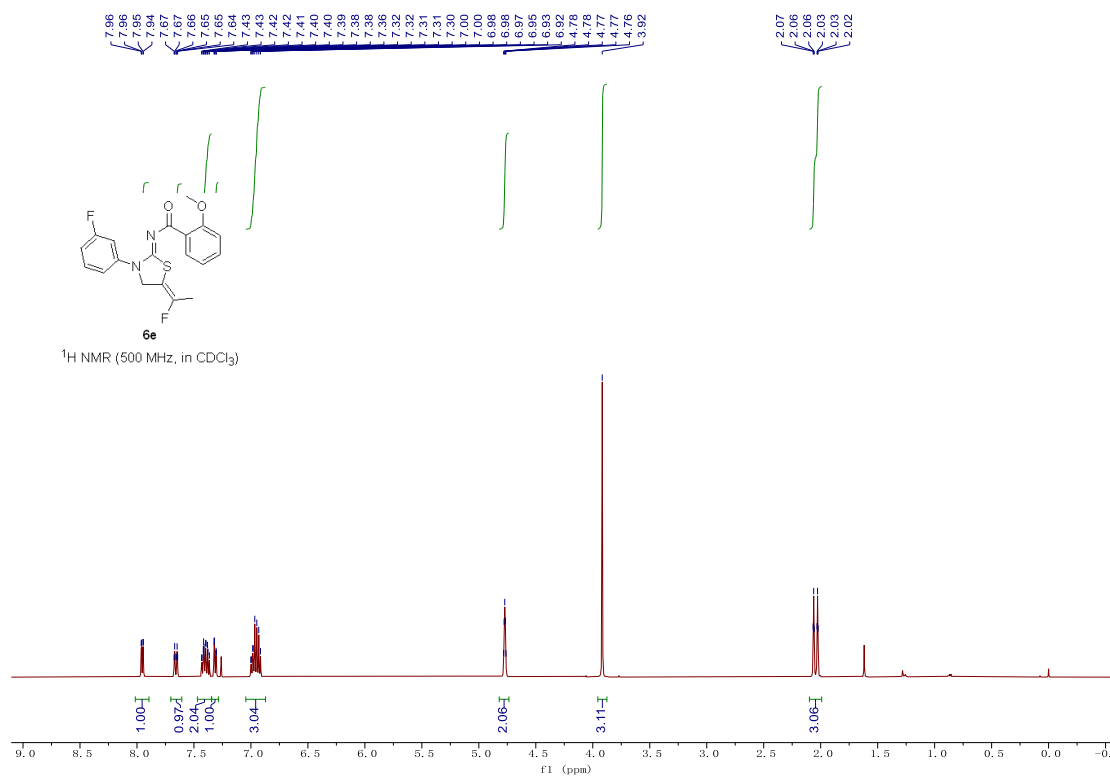

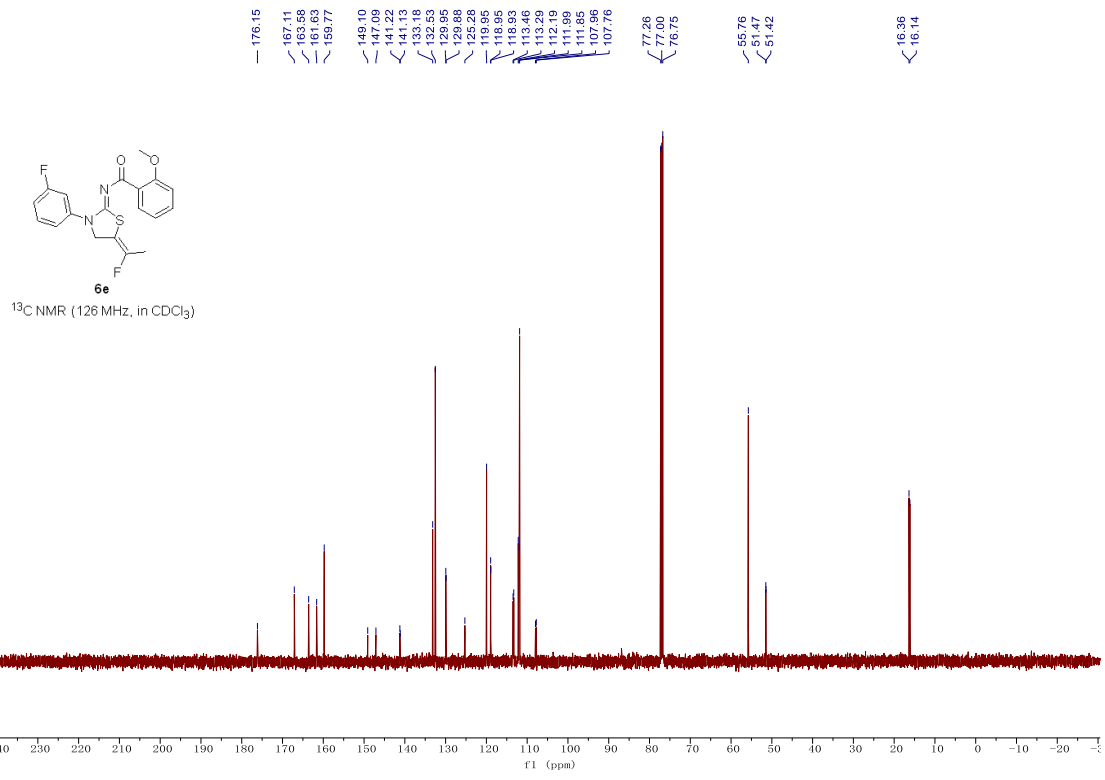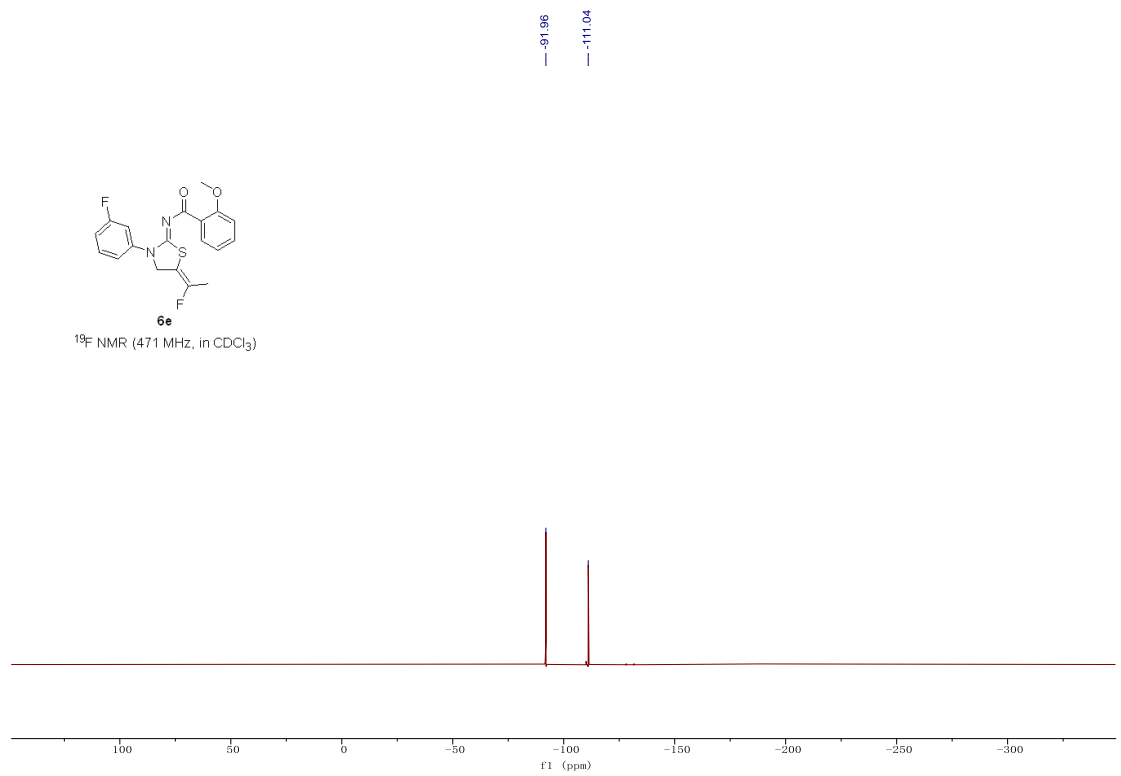

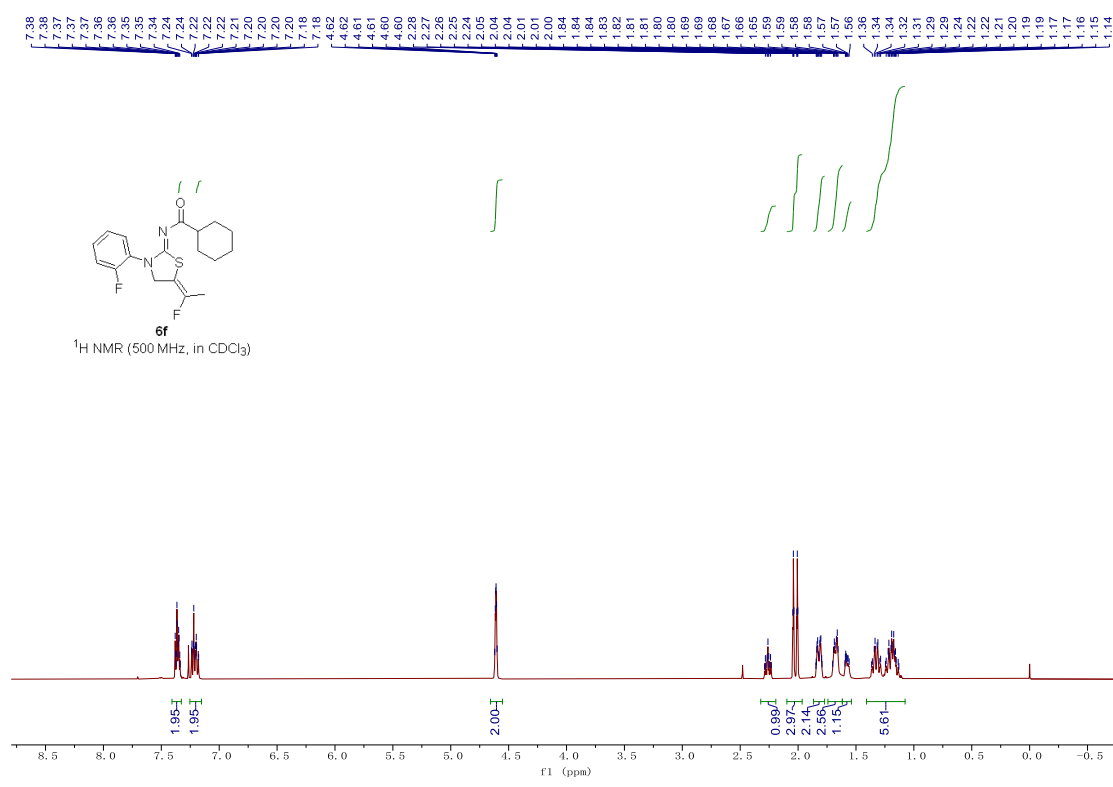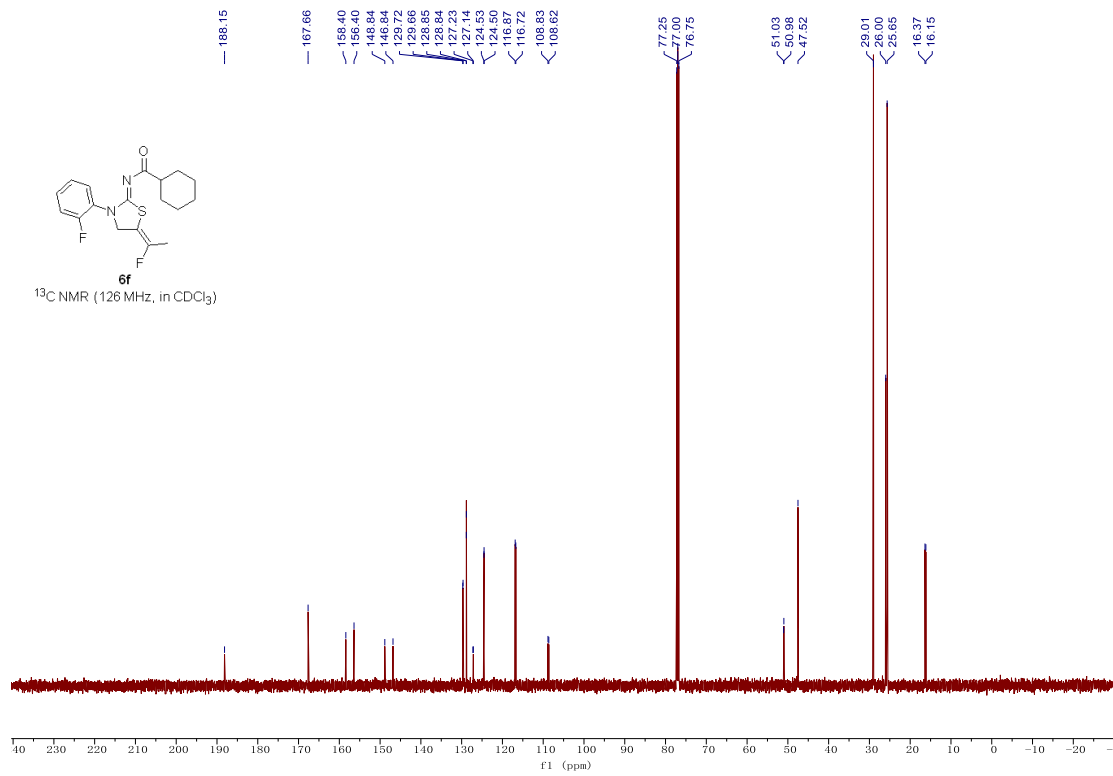

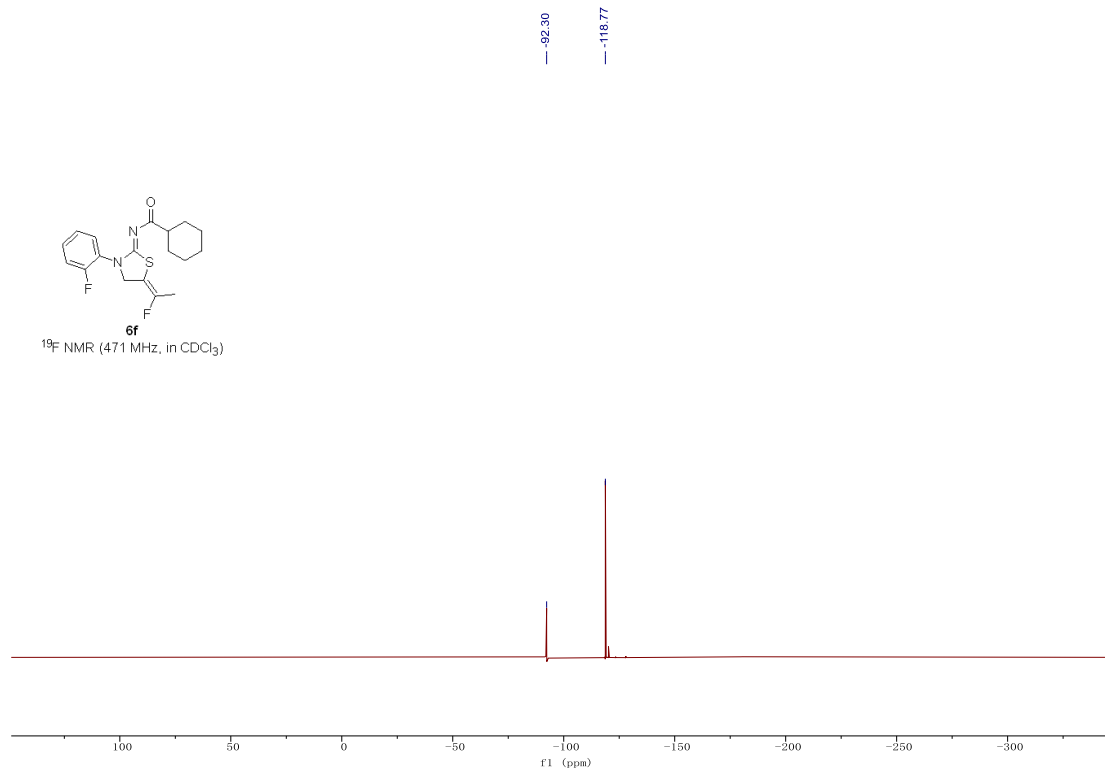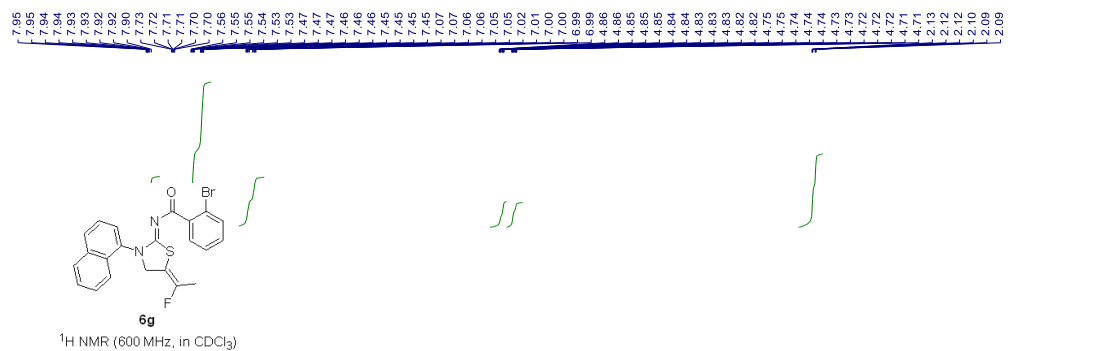

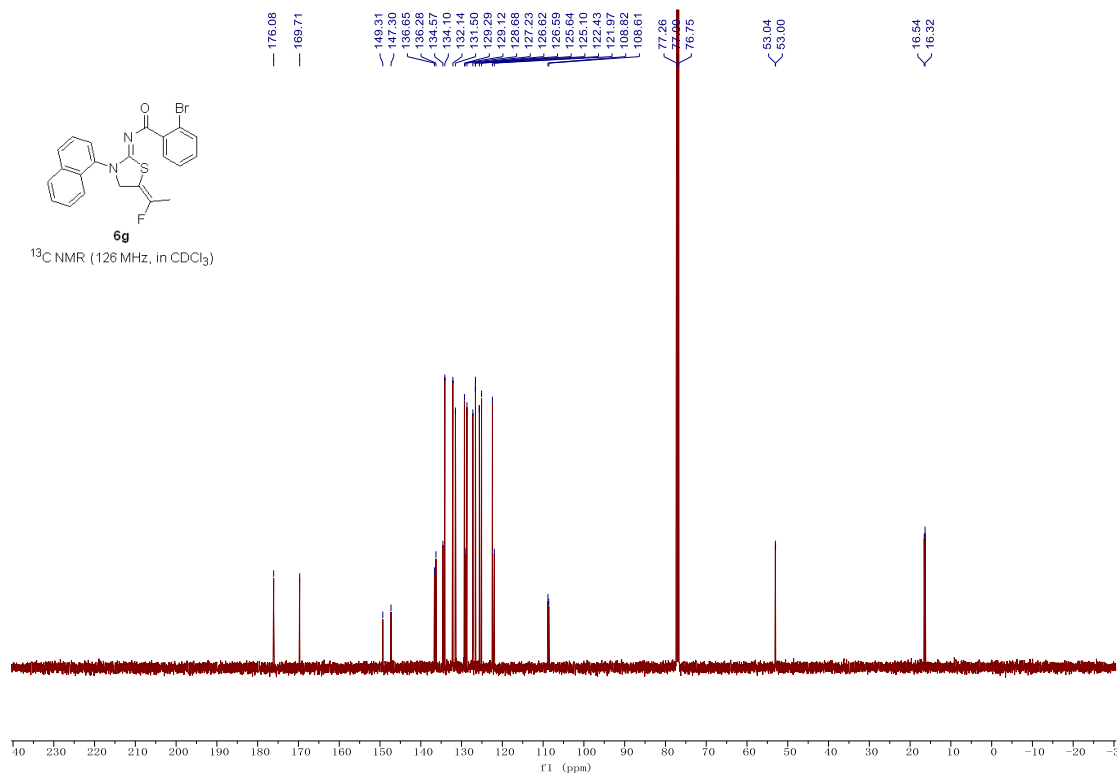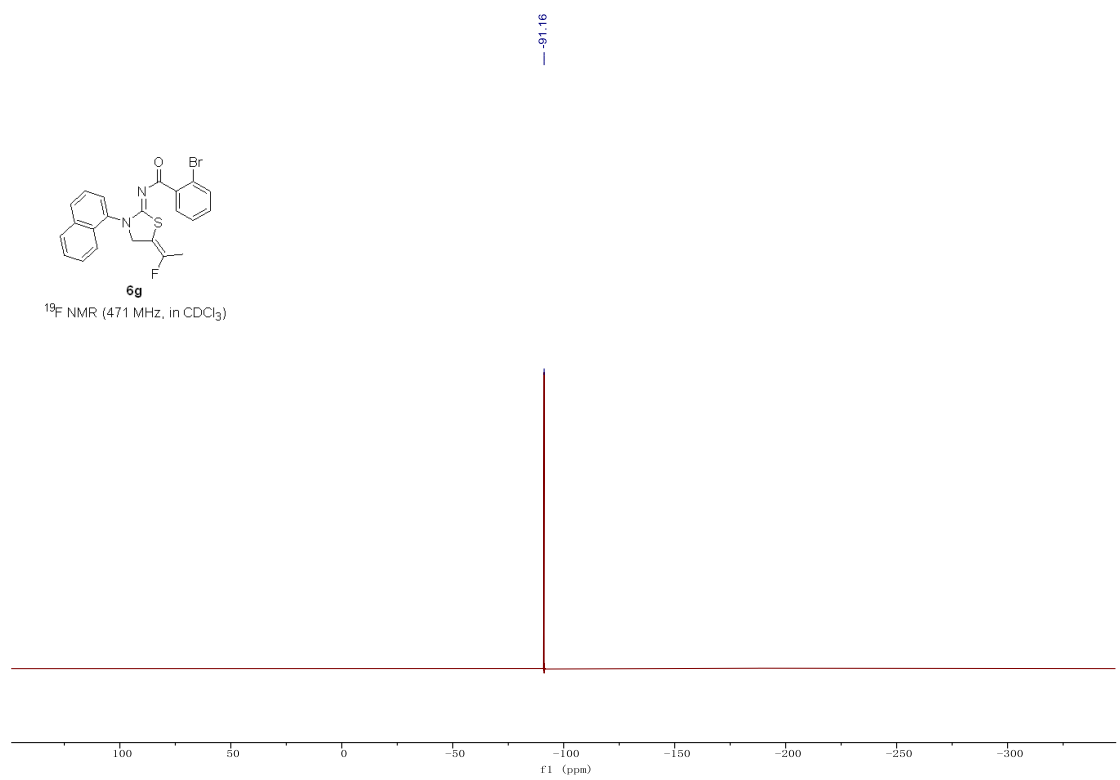

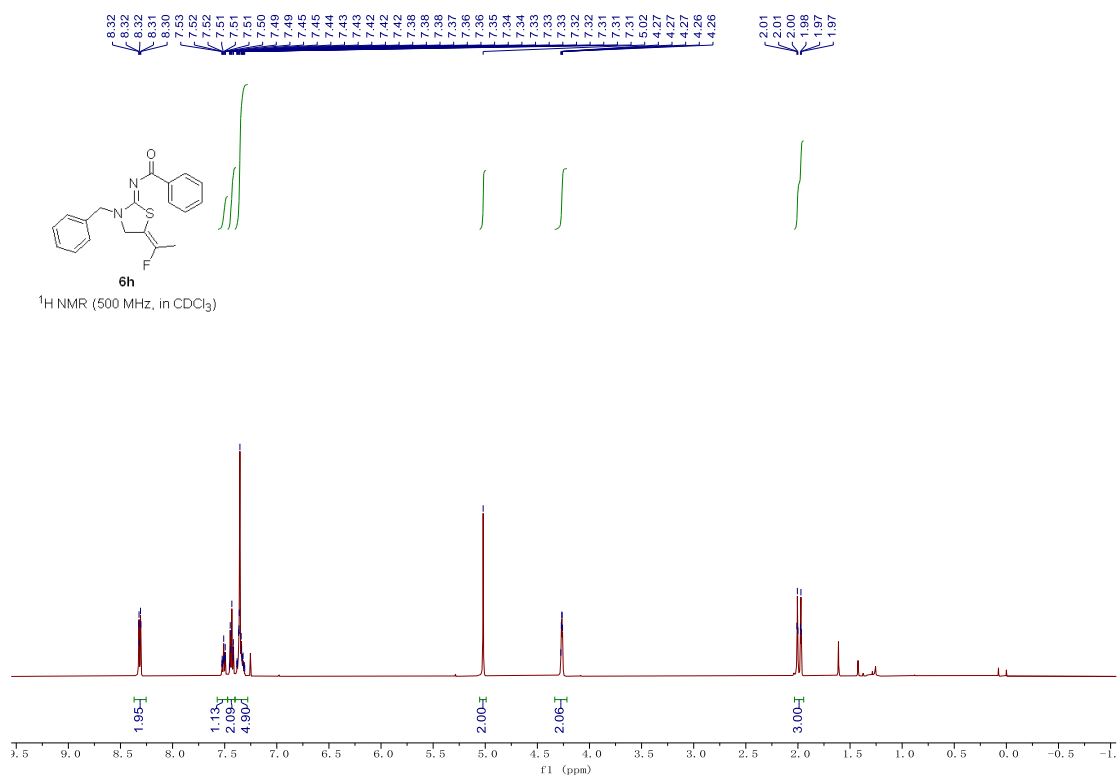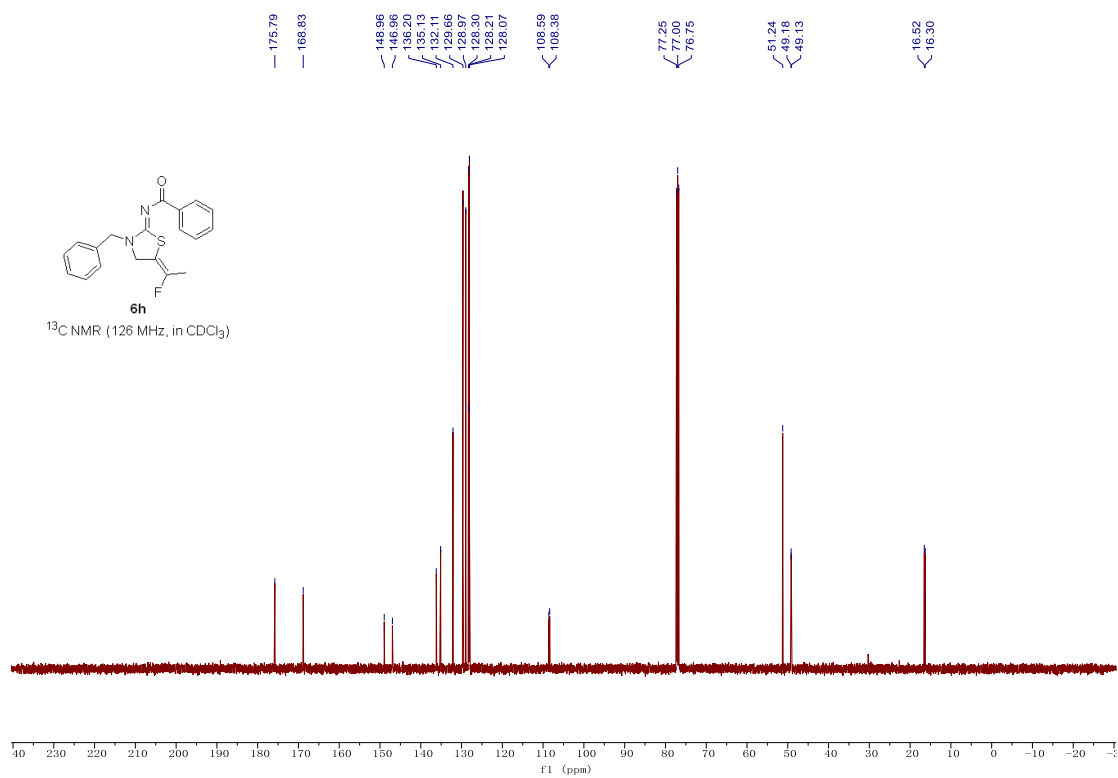



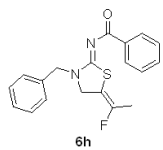

<sup>19</sup>F NMR (471 MHz, in CDCl<sub>3</sub>)

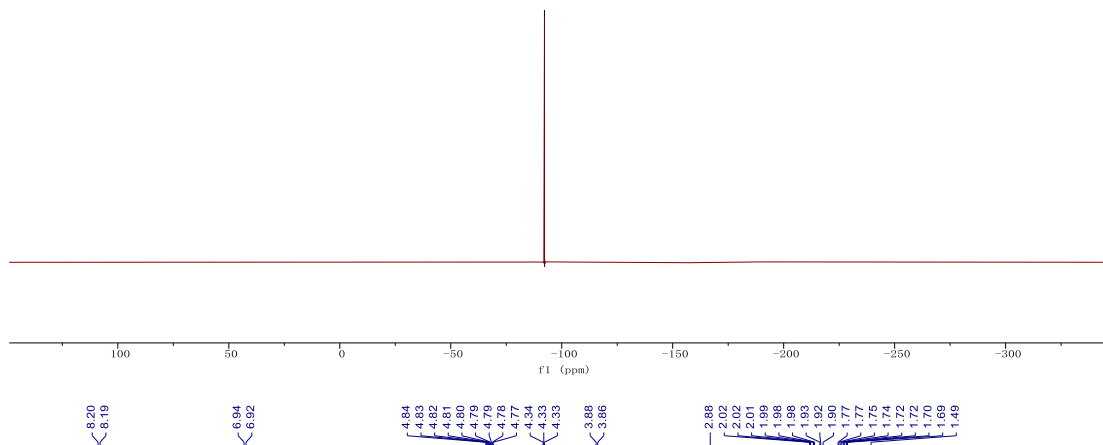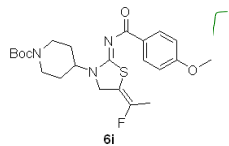

<sup>1</sup>H NMR (500 MHz, in CDCl<sub>3</sub>)

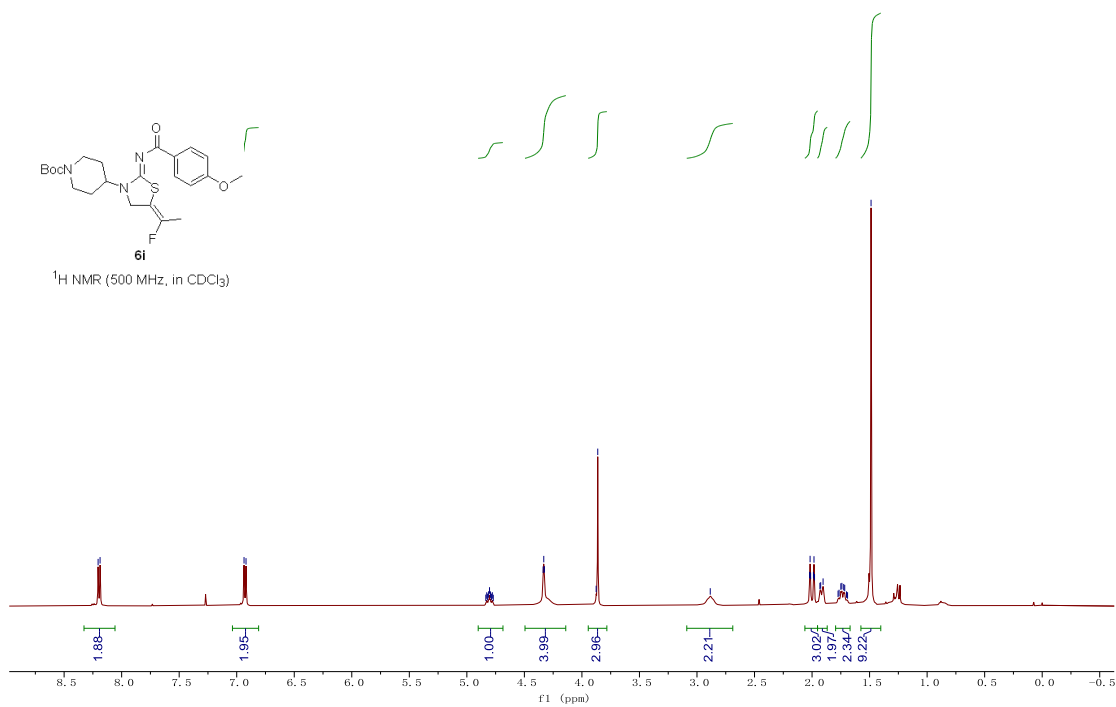

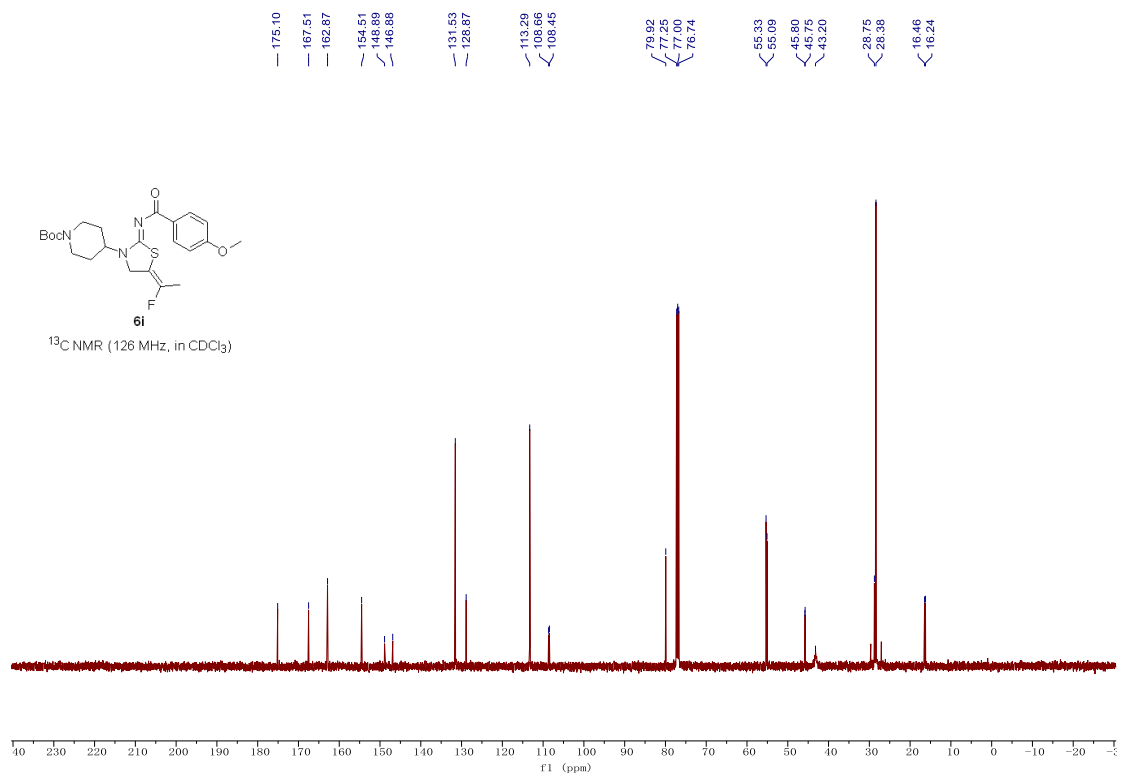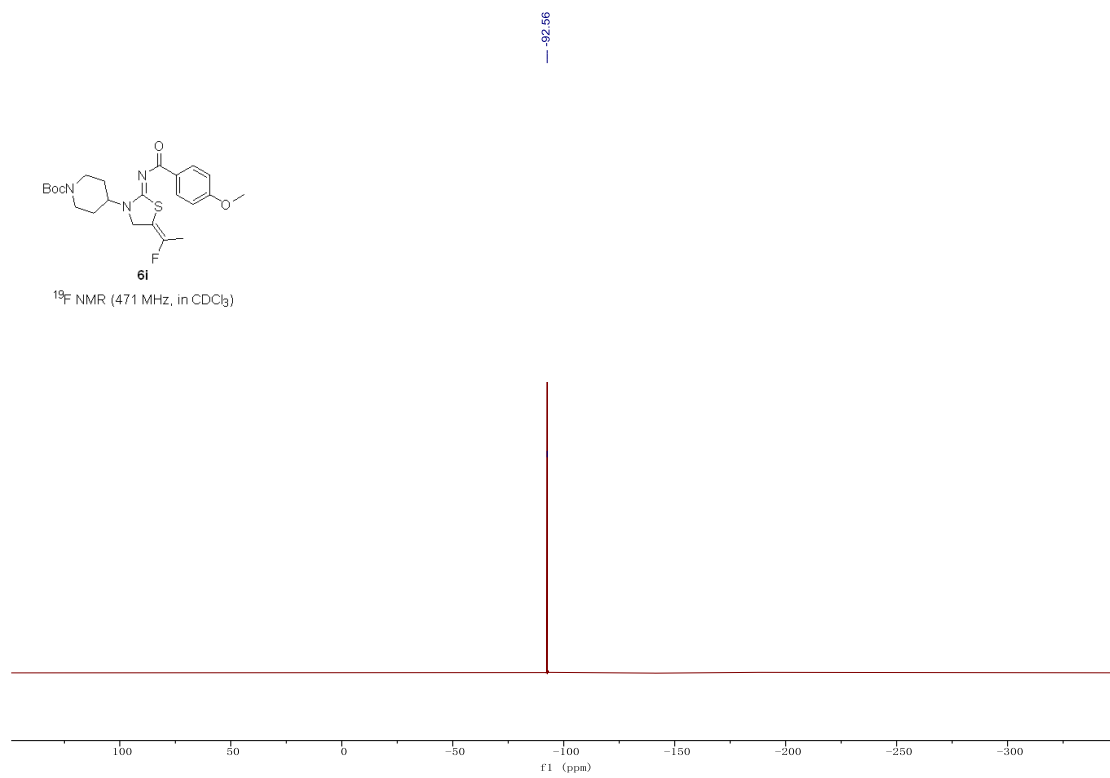

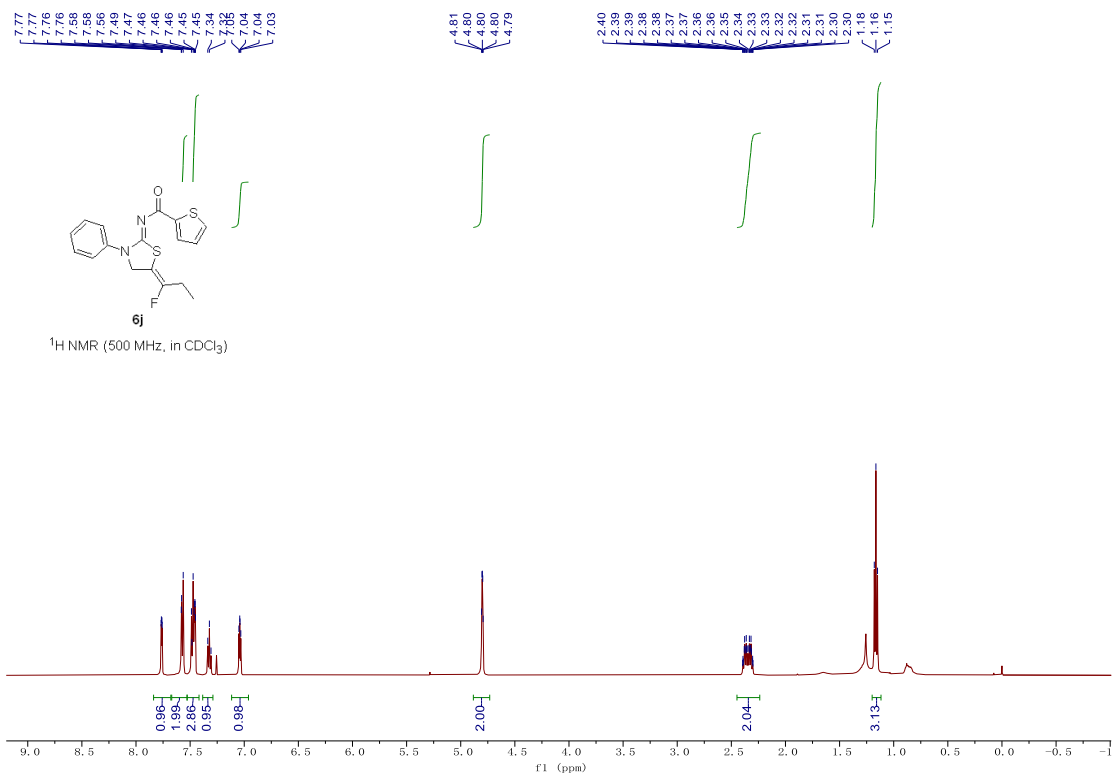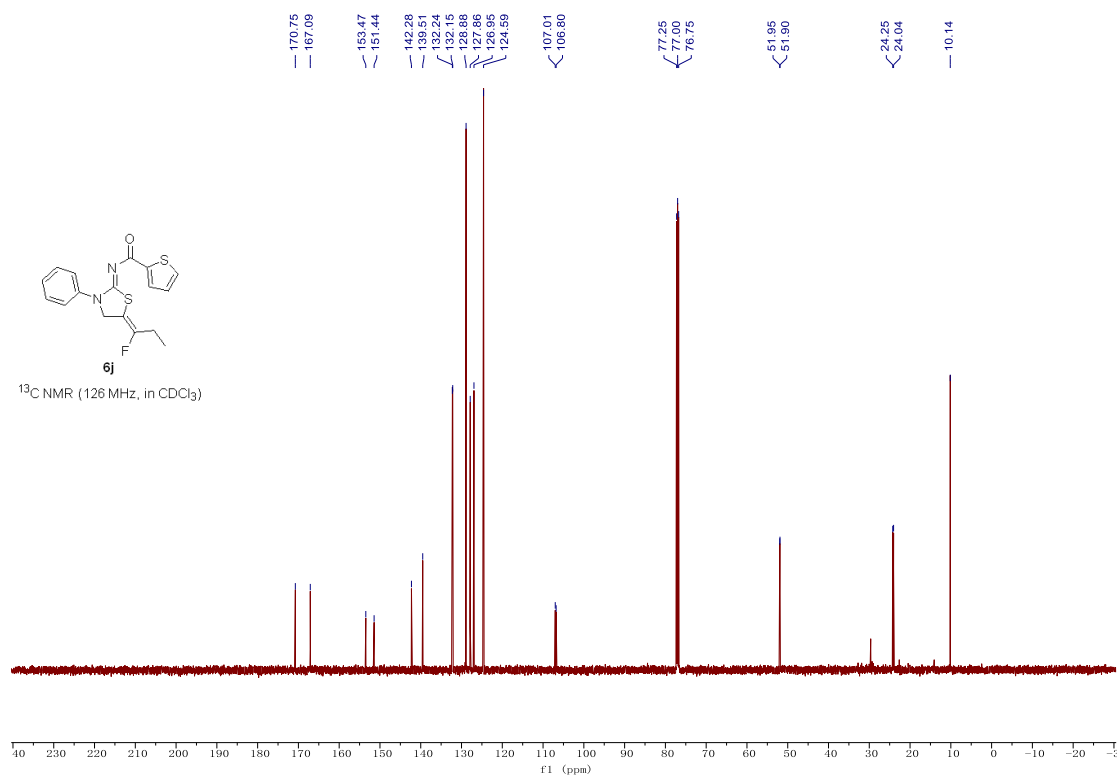

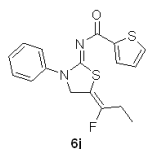

<sup>19</sup>F NMR (471 MHz, in CDCl<sub>3</sub>)

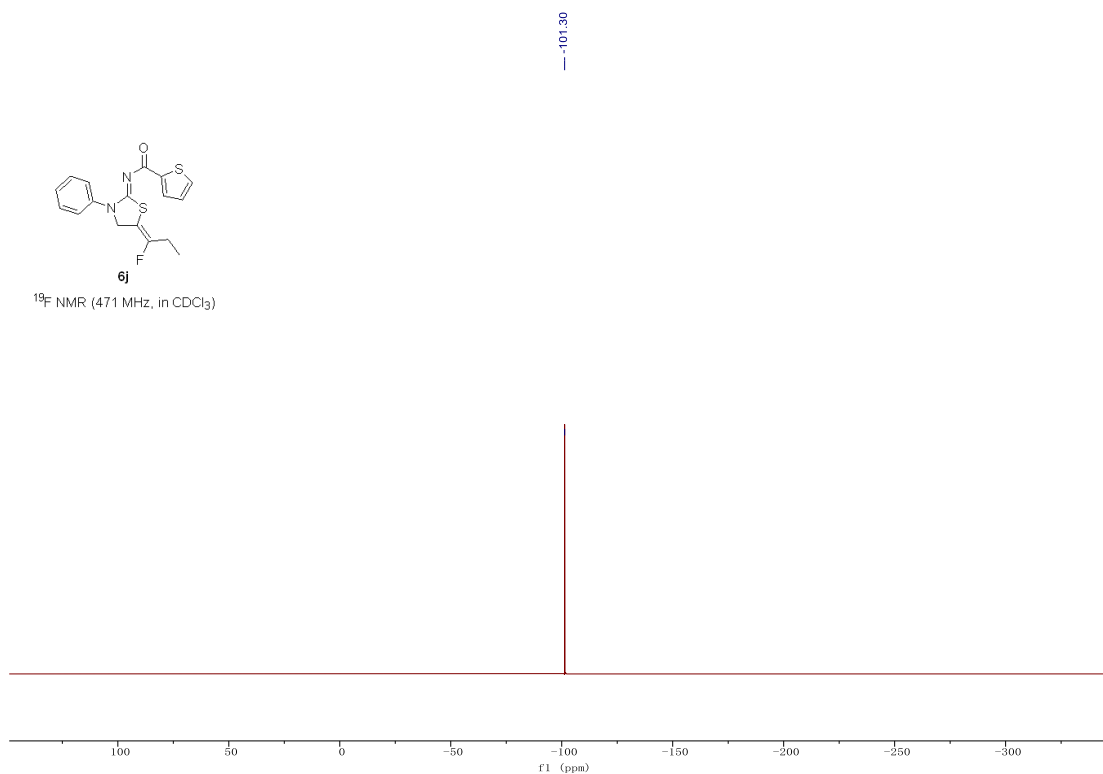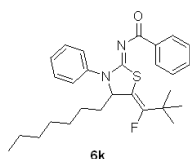

<sup>1</sup>H NMR (500 MHz, in CDCl<sub>3</sub>)

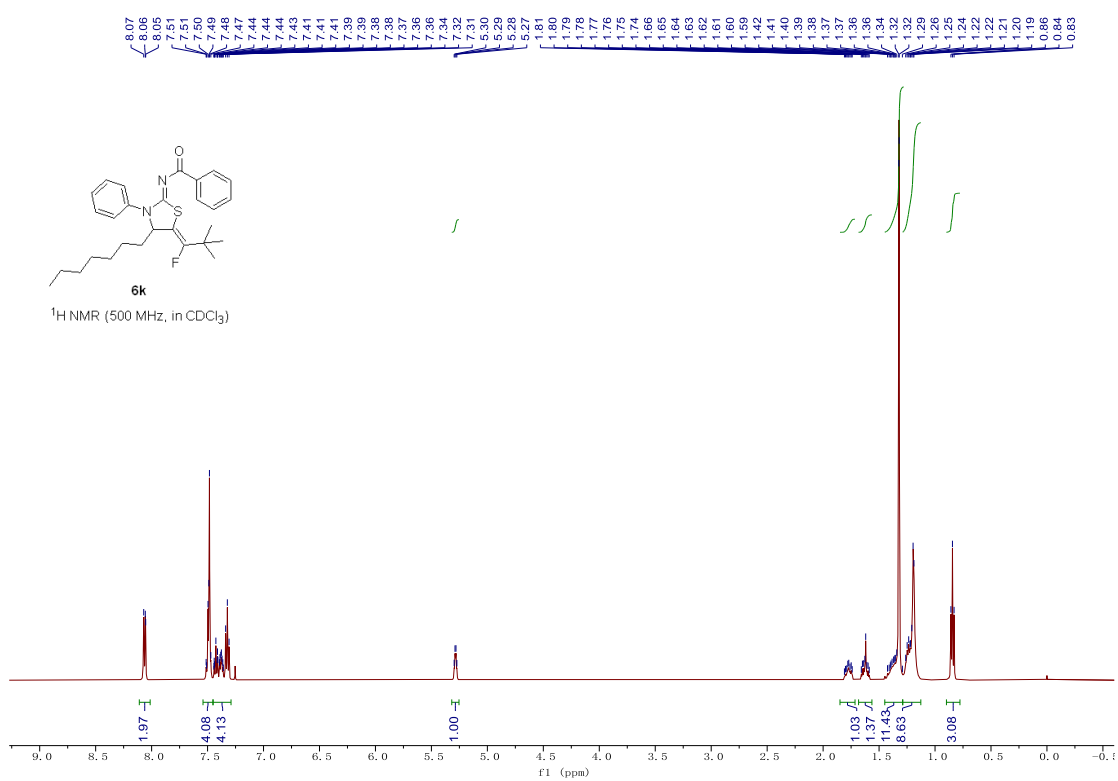

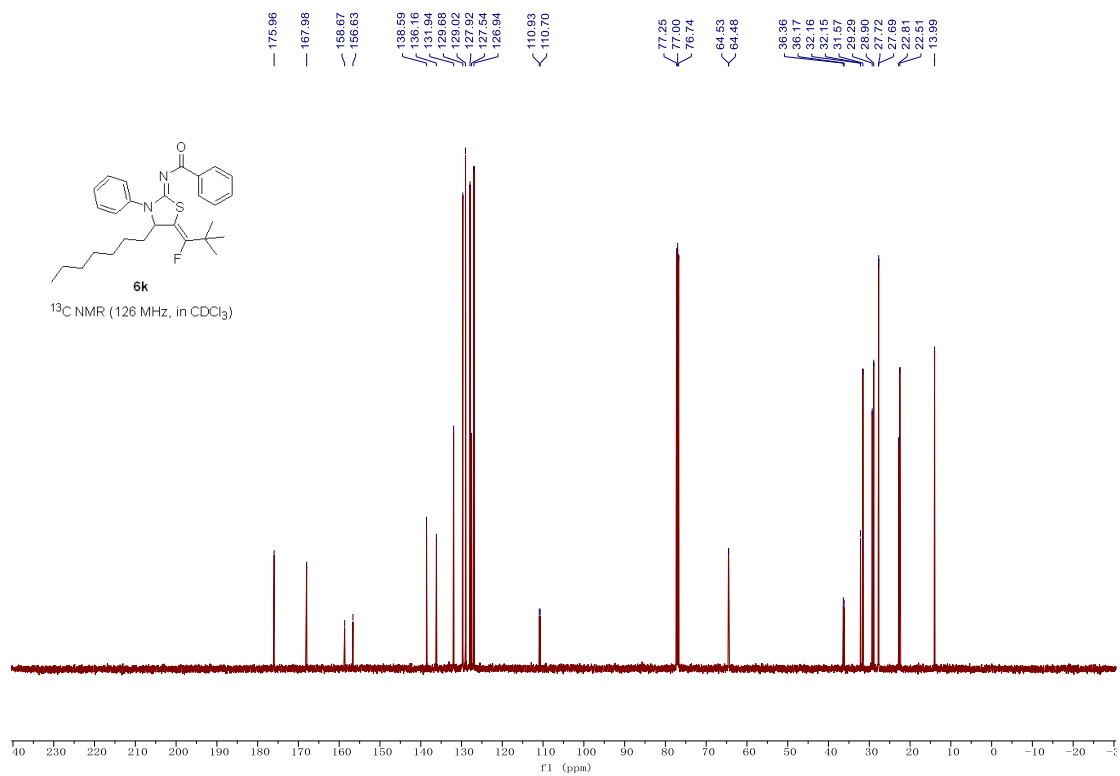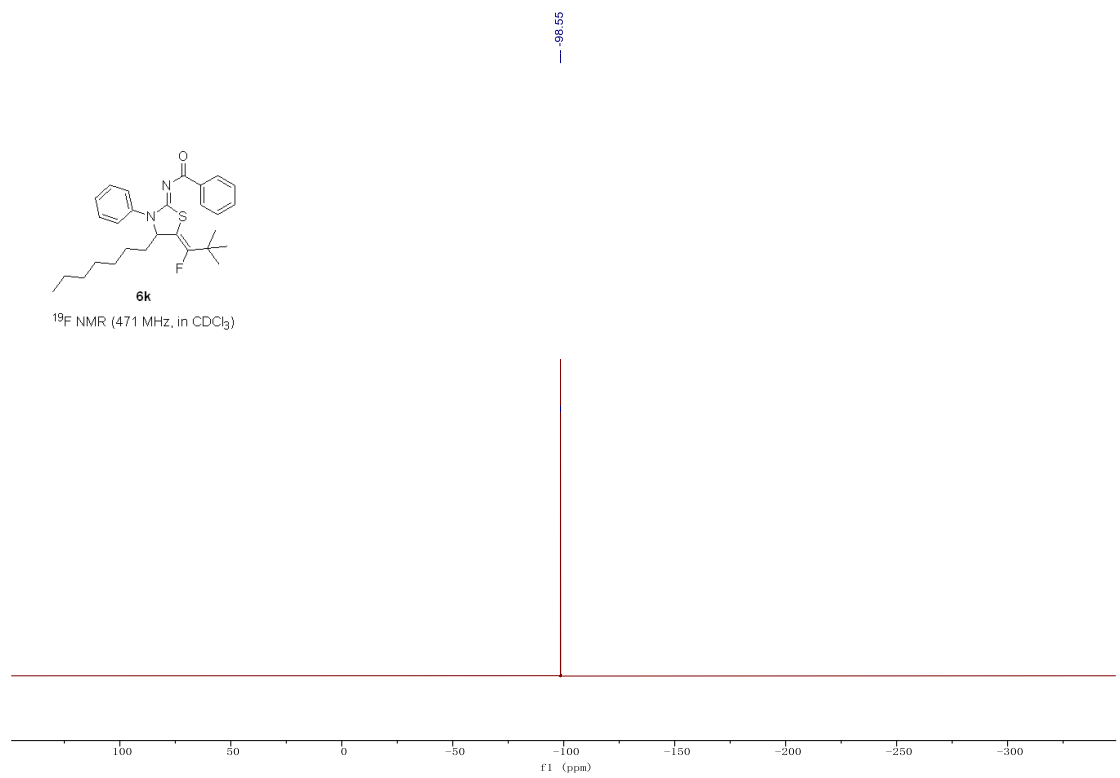

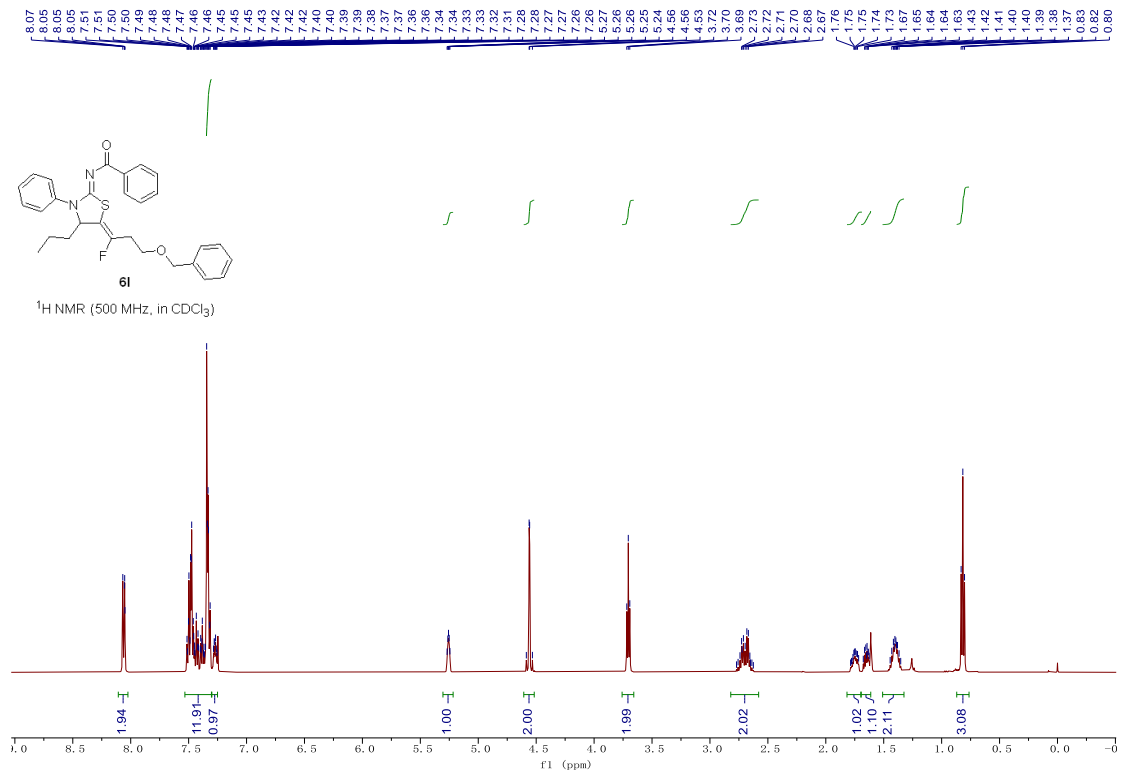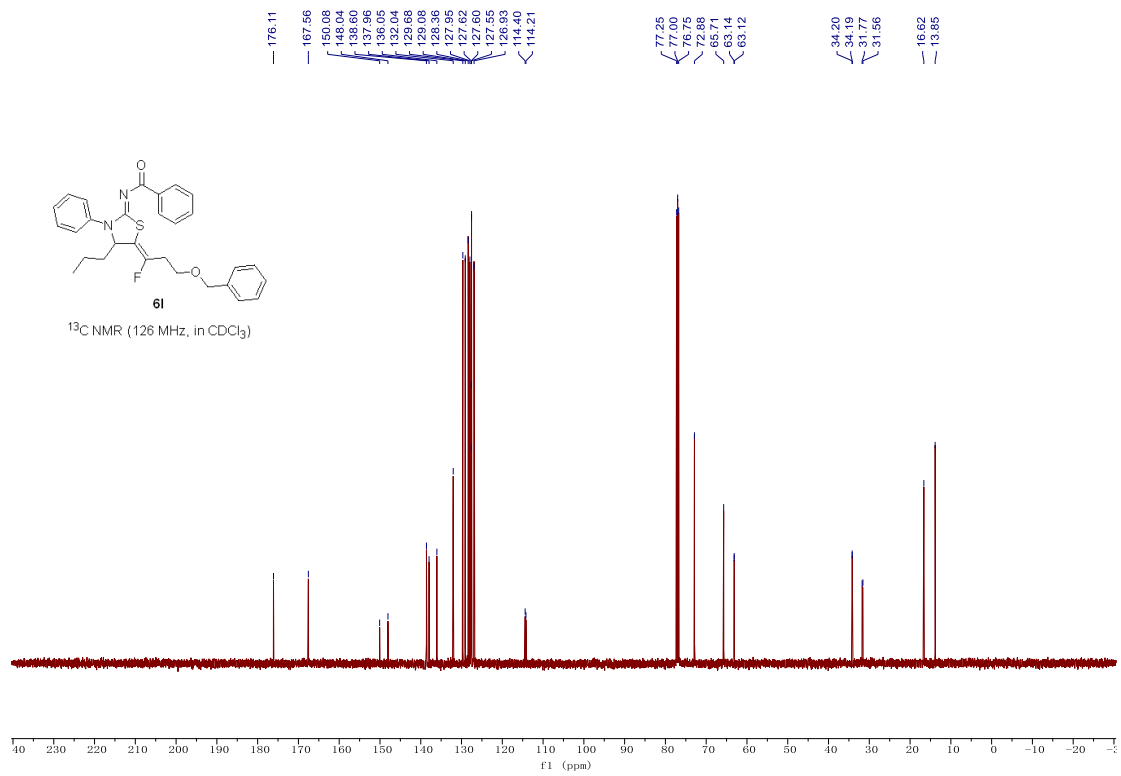

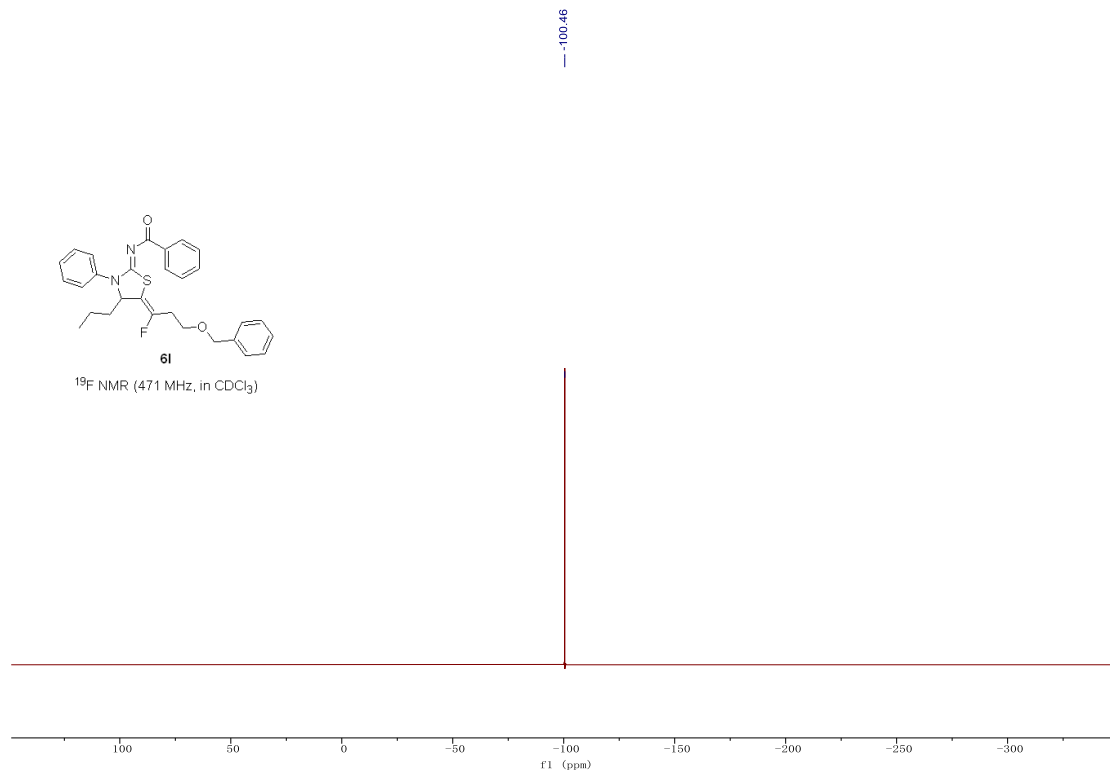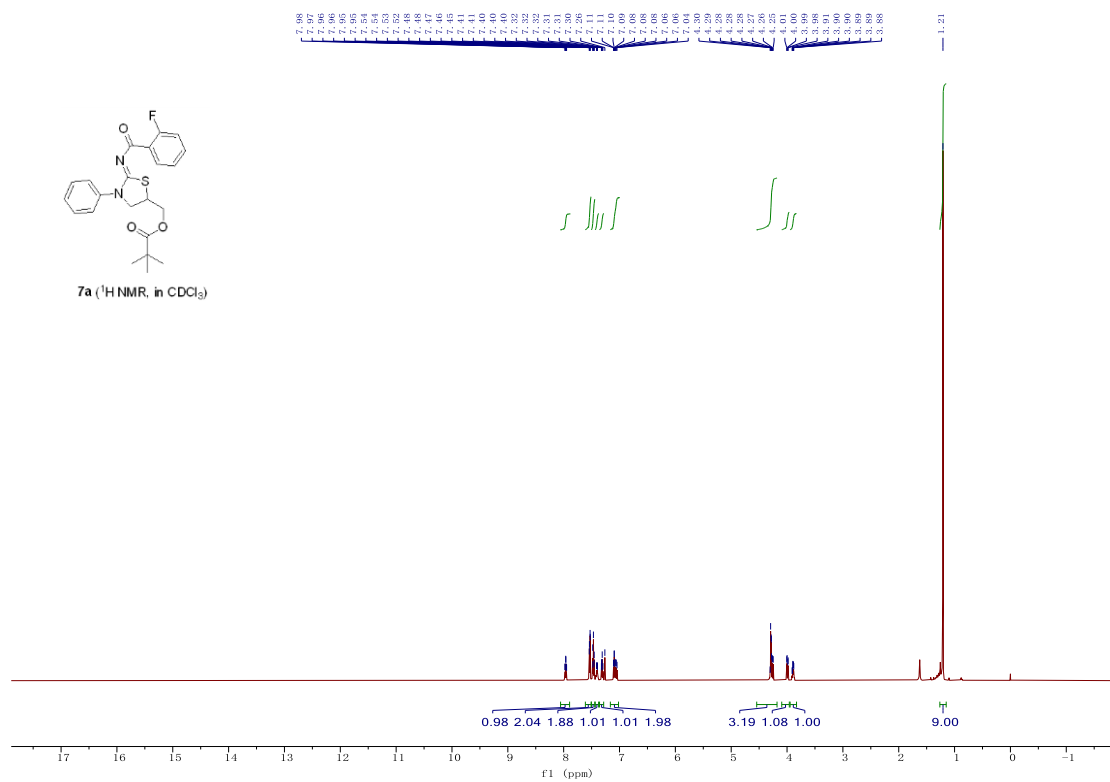

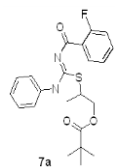

$^{13}\text{C}$  NMR (126 MHz, in  $\text{CDCl}_3$ )

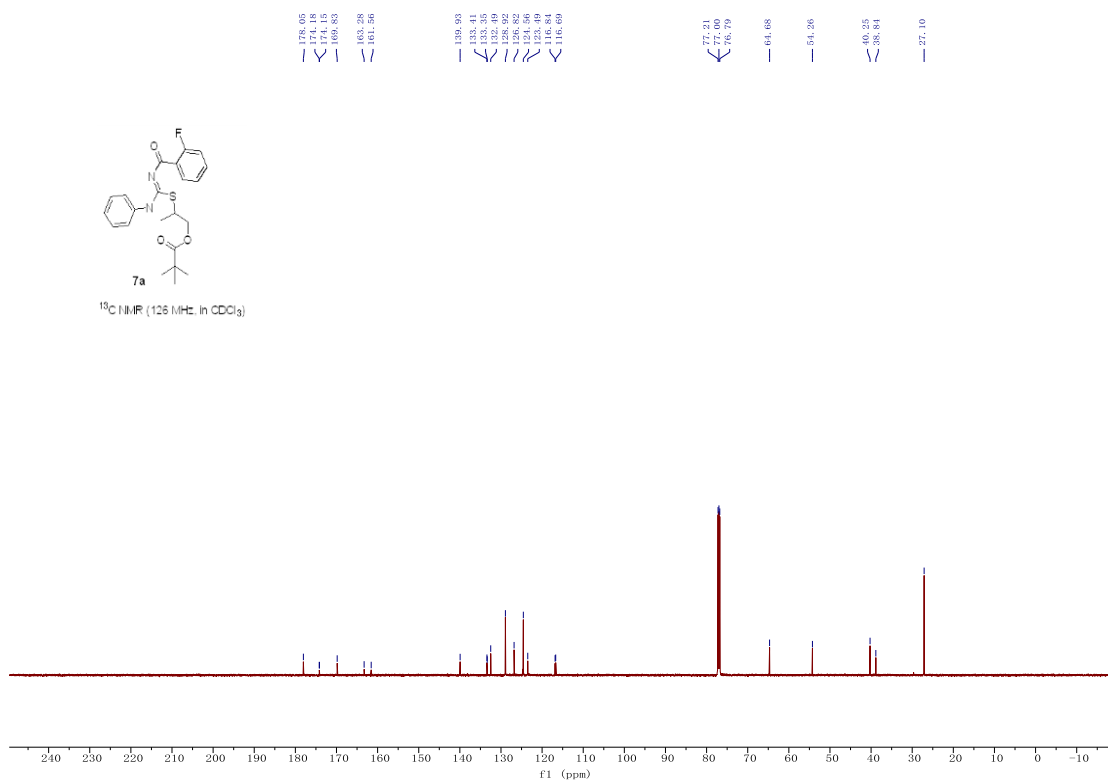

Supplement: d4qo01569j1.pdf [file d4qo01569j1.pdf]
